# Supplementary material for: Characterizing Relevant MicroRNA Editing Sites in Parkinson’s Disease
Source: Cells. 2022 Dec 24;12(1):75. doi: 10.3390/cells12010075 (PMC9818192; doi:10.3390/cells12010075)
Supplement: Supplementary file 1 [file cells-12-00075-s001.zip]

Archive with 21 entries (21 files):
- SupplementaryFigures-2022-12-07.pdf
- TableS10_Fig4-source-data-2021-10-20.xlsx
- TableS11_Fig5-source-data-2022-08-01.xlsx
- TableS12_FigS1-source-data-2021-10-20.xlsx
- TableS13_FigS2-source-data-2021-10-20.xlsx
- TableS14_FigS3-source-data-2021-11-14.xlsx
- TableS15_FigS4-source-data-2021-11-14.xlsx
- TableS16_FigS5-source-data-2022-12-7.xlsx
- TableS17_FigS6-source-data-2022-12-4.xlsx
- TableS18_FigS7-source-data-2020-3-28.xlsx
- TableS19_FigS8-source-data-2020-3-28.xlsx
- TableS1_sRNA-seq profiles-2020-04-06.xlsx
- TableS20_FigS9-source-data-2021-04-06.xlsx
- TableS2_860-editing-site-2022-11-30.xlsx
- TableS3_significantly different edting level-12-5.xlsx
- TableS4_the targets of  A-to-I edited miRNAs.xlsx
- TableS5_GO-and-KEGG-2021-04-06.xlsx
- TableS6_primer.xlsx
- TableS7_Fig1-source-data-2021-10-20.xlsx
- TableS8_Fig2-source-data-2022-12-5.xlsx
- TableS9_Fig3-source-data-2020-3-29.xlsx
