# Supplementary material for: Characterizing Relevant MicroRNA Editing Sites in Parkinson’s Disease
Source: Cells. 2022 Dec 24;12(1):75. doi: 10.3390/cells12010075 (PMC9818192; doi:10.3390/cells12010075)
Supplement: Supplementary file 1 [file cells-12-00075-s001.zip › TableS4_the targets of A-to-I edited miRNAs.xlsx]

## Sheet: TableS4.1
Table S4.1 The targets of 4 A-to-I edited miRNAs. The targets of A-to-I edited hsa-mir-411-5p (hsa-mir-411_20g), hsa-miR-497-5p (miR-497_25g), hsa-mir-1251-5p (hsa-mir-1251_10g) and hsa-mir-1301-3p (hsa-mir-1301_52g) were predicted with the MiCPAR algorithm (see Methods) using 11 PAR-CLIP sequecing profiles in Table S1.3. Only targets having at least 1 PAR-CLIP read with T-to-C variation were inc…
Query	Ref	Total_Hits	Total_Score	Max_Score	Score_PValue	Corrected_Score_PValue	U-to-C_Reads	Total_Reads	Variation_PValue	Total_Mismatches	Mismatch_PValue	Total_Extension	Total_Matched_Length	Seed_Score	12-17nt_Score	Close_Hit_Score	AU_Content_Score	Position_Score	FirstA_Score	Query_Len	Ref_Len	Query_Start	Query_End	Ref_Start	Ref_End	Query_Paired	Ref_Paired	Centered_Pair	Site_Type	Ref.	#tax_id	GeneID	Symbol	Synonyms	description	Other_designations	RNA_nucleotide_accession.version	protein_accession.version	genomic_nucleotide_accession.version	type_of_gene	status	chromosome	orientation	start_position_on_the_genomic_accession	end_position_on_the_genomic_accession	assembly
hsa-mir-411_20g	NM_001130410.1	1	547.2	547.2	3.49e-05	0.000137	1	1	6.54e-06	11.5	1	0	8	244	0	0	225.2	0	0	19	1561	12	19	555	562	8	8	0	read	NM_001130410.1	9606	30	ACAA1	ACAA|PTHIO|THIO	acetyl-CoA acyltransferase 1	3-ketoacyl-CoA thiolase, peroxisomal|acetyl-Coenzyme A acyltransferase 1|beta-ketothiolase|peroxisomal 3-oxoacyl-CoA thiolase|peroxisomal 3-oxoacyl-Coenzyme A thiolase|testicular tissue protein Li 197	NM_001130410.1	NP_001123882.1	NC_000003.12	protein-coding	REVIEWED	3	-	38122709	38137241	Reference GRCh38.p12 Primary Assembly
hsa-mir-411_20g	NM_021116.3	3	1561.7	554.2	0.000474	0.00231	1	1	6.54e-06	6	1	0	19	312	4	0	149.2	0	0	19	12503	1	19	11569	11587	19	19	0	read	NM_021116.3	9606	107	ADCY1	AC1|DFNB44	adenylate cyclase 1	adenylate cyclase type 1|3',5'-cyclic AMP synthetase|ATP pyrophosphate-lyase 1|Ca(2+)/calmodulin-activated adenylyl cyclase|adenyl cyclase|adenylate cyclase 1 (brain)|adenylate cyclase type I|adenylyl cyclase 1	NM_021116.3	NP_066939.1	NC_000007.14	protein-coding	REVIEWED	7	+	45574139	45723115	Reference GRCh38.p12 Primary Assembly
hsa-mir-411_20g	NM_001030055.1	1	570.4	570.4	6.1e-05	0.000623	1	1	6.54e-06	7	1	0	19	244	12	0	236.4	0	0	19	9604	1	19	8842	8860	19	19	0	read	NM_001030055.1	9606	394	ARHGAP5	GFI2|RhoGAP5|p190-B|p190BRhoGAP	Rho GTPase activating protein 5	rho GTPase-activating protein 5|growth factor independent 2|p100 RasGAP-associated p105 protein|p105 RhoGAP|rho-type GTPase-activating protein 5	NM_001030055.1	NP_001025226.1	NC_000014.9	protein-coding	REVIEWED	14	+	32072587	32159727	Reference GRCh38.p12 Primary Assembly
hsa-mir-411_20g	NM_001164751.1	1	594.5	594.5	0.0005	0.00248	1	1	6.54e-06	6.5	1	0	18	244	8	0	254.5	0	0	19	3639	2	19	1196	1213	18	18	0	read	NM_001164751.1	9606	444	ASPH	AAH|BAH|CASQ2BP1|FDLAB|HAAH|JCTN|junctin	aspartate beta-hydroxylase	aspartyl/asparaginyl beta-hydroxylase|A beta H-J-J|ASP beta-hydroxylase|cardiac junctin|humbug|junctate|peptide-aspartate beta-dioxygenase	NM_001164751.1	NP_001158223.1	NC_000008.11	protein-coding	REVIEWED	8	-	61500555	61714639	Reference GRCh38.p12 Primary Assembly
hsa-mir-411_20g	NM_001286822.1	1	677.3	677.3	4.25e-05	0.00106	3	3	2.18e-14	10	1	0	10	312	0	0	202.3	0	0	19	2515	10	19	864	873	10	10	0	read	NM_001286822.1	9606	754	PTTG1IP	C21orf1|C21orf3|PBF	PTTG1 interacting protein	pituitary tumor-transforming gene 1 protein-interacting protein|PTTG-binding factor|pituitary tumor-transforming 1 interacting protein|pituitary tumor-transforming gene protein-binding factor	NM_001286822.1	NP_001273751.1	NC_000021.9	protein-coding	REVIEWED	21	-	44849584	44873902	Reference GRCh38.p12 Primary Assembly
hsa-mir-411_20g	NM_001321839.1	1	615.3	615.3	8.31e-05	0.00103	1	1	6.54e-06	5.5	1	0	19	244	40	0	244.3	0	0	19	5654	1	19	1905	1923	19	19	0	read	NM_001321839.1	9606	767	CA8	CA-RP|CA-VIII|CALS|CAMRQ3|CARP	carbonic anhydrase 8	carbonic anhydrase-related protein|CA-related protein|carbonate dehydratase|carbonic anhydrase VIII|carbonic anhydrase-like sequence	NM_001321839.1	NP_001308768.1	NC_000008.11	protein-coding	REVIEWED	8	-	60185419	60281422	Reference GRCh38.p12 Primary Assembly
hsa-mir-411_20g	NM_001204492.1	1	587.4	587.4	0.000566	0.0026	1	1	6.54e-06	11	1	0	8	312	0	0	195.4	0	0	19	3767	12	19	1706	1713	8	8	0	read	NM_001204492.1	9606	818	CAMK2G	CAMK|CAMK-II|CAMKG	calcium/calmodulin dependent protein kinase II gamma	calcium/calmodulin-dependent protein kinase type II subunit gamma|caMK-II subunit gamma|calcium/calmodulin-dependent protein kinase (CaM kinase) II gamma	NM_001204492.1	NP_001191421.1	NC_000010.11	protein-coding	REVIEWED	10	-	73812500	73874590	Reference GRCh38.p12 Primary Assembly
hsa-mir-411_20g	NM_001011553.3	1	702.6	702.6	1.71e-07	1.8e-06	2	2	3.54e-10	8	1	0	13	312	0	0	264.6	0	0	19	4377	7	19	1126	1138	13	13	0	read	NM_001011553.3	9606	989	SEPt7	CDC10|CDC3|NBLA02942|SEPT7A	septin 7	septin-7|CDC10 (cell division cycle 10, S. cerevisiae, homolog)|CDC10 protein homolog|septin 7 variant 4	NM_001011553.3	NP_001011553.2	NC_000007.14	protein-coding	REVIEWED	7	+	35800985	35915762	Reference GRCh38.p12 Primary Assembly
hsa-mir-411_20g	NM_001789.2	1	580.4	580.4	4.92e-05	0.000259	2	2	3.54e-10	11.5	1	0	8	244	0	0	218.4	0	0	19	3717	12	19	2917	2924	8	8	0	read	NM_001789.2	9606	993	CDC25A	CDC25A2	cell division cycle 25A	M-phase inducer phosphatase 1|CDC25 isoform A1-CAG|CDC25A2-CAG isoform|dual specificity phosphatase CDC25A	NM_001789.2	NP_001780.2	NC_000003.12	protein-coding	REVIEWED	3	-	48157177	48188404	Reference GRCh38.p12 Primary Assembly
hsa-mir-411_20g	NM_001346232.1	1	664.4	664.4	0.0108	0.0571	2	2	3.54e-10	11	1	0	8	312	0	0	232.4	0	0	19	5454	12	19	2606	2613	8	8	0	read	NM_001346232.1	9606	1108	CHD4	CHD-4|Mi-2b|Mi2-BETA|SIHIWES	chromodomain helicase DNA binding protein 4	chromodomain-helicase-DNA-binding protein 4|ATP-dependent helicase CHD4|Mi-2 autoantigen 218 kDa protein	NM_001297553.2	NP_001284482.1	NC_000012.12	protein-coding	REVIEWED	12	-	6570081	6607438	Reference GRCh38.p12 Primary Assembly
hsa-mir-411_20g	NM_001290307.2	1	726.5	726.5	2.11e-05	0.000241	2	9	0.00888	5	1	0	19	312	20	0	261.5	0	0	19	3872	1	19	3833	3851	19	19	0	read	NM_001290307.2	9606	1495	CTNNA1	CAP102|MDPT2	catenin alpha 1	catenin alpha-1|alpha-E-catenin|catenin (cadherin-associated protein), alpha 1, 102kDa|renal carcinoma antigen NY-REN-13	NM_001290307.2	NP_001277236.1	NC_000005.10	protein-coding	REVIEWED	5	+	138753385	138935033	Reference GRCh38.p12 Primary Assembly
hsa-mir-411_20g	NM_000786.3	1	642	642	1.11e-05	0.000177	1	1	6.54e-06	6.5	1	0	15	320	0	0	226	0	0	19	3208	5	19	1562	1576	15	15	0	read	NM_000786.3	9606	1595	CYP51A1	CP51|CYP51|CYPL1|LDM|P450-14DM|P450L1	cytochrome P450 family 51 subfamily A member 1	lanosterol 14-alpha demethylase|CYPLI|cytochrome P450 51A1|cytochrome P450, 51 (lanosterol 14-alpha-demethylase)|cytochrome P450, family 51, subfamily A, polypeptide 1|cytochrome P450-14DM|cytochrome P45014DM|cytochrome P450LI|sterol 14-alpha demethylase	NM_000786.3	NP_000777.1	NC_000007.14	protein-coding	REVIEWED	7	-	92112148	92134744	Reference GRCh38.p12 Primary Assembly
hsa-mir-411_20g	NM_001081560.2	1	547.8	547.8	0.00147	0.00314	1	1	6.54e-06	6.5	1	0	16	312	0	0	142.8	0	0	19	2859	4	19	1068	1083	16	16	0	read	NM_001081560.2	9606	1760	DMPK	DM|DM1|DM1PK|DMK|MDPK|MT-PK	DM1 protein kinase	myotonin-protein kinase|DM protein kinase|dystrophia myotonica protein kinase|myotonic dystrophy associated protein kinase|myotonin protein kinase A|thymopoietin homolog	NM_001081560.2	NP_001075029.1	NC_000019.10	protein-coding	REVIEWED	19	-	45769708	45782556	Reference GRCh38.p12 Primary Assembly
hsa-mir-411_20g	NM_004947.4	2	686	573.4	0.000778	0.00296	2	2	3.54e-10	10	1	0	10	312	0	0	138.4	0	0	19	8777	10	19	5824	5833	10	10	0	read	NM_004947.4	9606	1795	DOCK3	MOCA|PBP	dedicator of cytokinesis 3	dedicator of cytokinesis protein 3|modifier of cell adhesion|presenilin-binding protein	NM_004947.4	NP_004938.1	NC_000003.12	protein-coding	REVIEWED	3	+	50674968	51384197	Reference GRCh38.p12 Primary Assembly
hsa-mir-411_20g	NM_001938.2	1	1169.2	1169.2	0	0	16	20	0	6	1	0	19	252	12	0	218.2	0	0	19	3222	1	19	1932	1950	19	19	0	read	NM_001938.2	9606	1810	DR1	NC2|NC2-BETA|NC2B|NCB2	down-regulator of transcription 1	protein Dr1|TATA-binding protein-associated phosphoprotein|negative cofactor 2|negative cofactor 2-beta	NM_001938.2	NP_001929.1	NC_000001.11	protein-coding	REVIEWED	1	+	93345920	93362591	Reference GRCh38.p12 Primary Assembly
hsa-mir-411_20g	NM_001015881.1	1	536.6	536.6	0.194	0.243	1	1	6.54e-06	10	1	0	11	244	0	0	209.6	0	0	19	1781	9	19	1355	1365	11	11	0	read	NM_001015881.1	9606	1831	TSC22D3	DIP|DSIPI|GILZ|TSC-22R	TSC22 domain family member 3	TSC22 domain family protein 3|DSIP-immunoreactive leucine zipper protein|DSIP-immunoreactive peptide|TSC-22 related protein|TSC-22-like protein|delta sleep-inducing peptide immunoreactor|glucocorticoid-induced leucine zipper protein	NM_001015881.1	NP_001015881.1	NC_000023.11	protein-coding	REVIEWED	X	-	107713220	107777328	Reference GRCh38.p12 Primary Assembly
hsa-mir-411_20g	NM_004094.4	1	799.8	799.8	2.79e-06	0.000169	7	7	0	8.5	1	0	15	244	0	0	239.8	0	0	19	4165	5	19	1939	1953	15	15	0	read	NM_004094.4	9606	1965	EIF2S1	EIF-2|EIF-2A|EIF-2alpha|EIF2|EIF2A	eukaryotic translation initiation factor 2 subunit alpha	eukaryotic translation initiation factor 2 subunit 1|eIF-2-alpha|eukaryotic translation initiation factor 2, subunit 1 alpha, 35kDa	NM_004094.4	NP_004085.1	NC_000014.9	protein-coding	VALIDATED	14	+	67360316	67386515	Reference GRCh38.p12 Primary Assembly
hsa-mir-411_20g	NM_001414.3	1	734.8	734.8	6.82e-08	1.59e-06	6	6	0	7.5	1	0	19	244	4	0	208.8	0	0	19	1886	1	19	924	942	19	19	0	read	NM_001414.3	9606	1967	EIF2B1	EIF2B|EIF2BA	eukaryotic translation initiation factor 2B subunit alpha	translation initiation factor eIF-2B subunit alpha|eIF-2B GDP-GTP exchange factor subunit alpha|eukaryotic translation initiation factor 2B, subunit 1 alpha, 26kDa	NM_001414.3	NP_001405.1	NC_000012.12	protein-coding	REVIEWED	12	-	123621022	123633775	Reference GRCh38.p12 Primary Assembly
hsa-mir-411_20g	NM_001130678.2	2	1123.7	640.6	5.41e-05	0.000511	3	6	2.12e-07	7	1	0	16	244	0	0	230.6	0	0	19	10188	4	19	1028	1043	16	16	0	read	NM_001130678.2	9606	1977	EIF4E	AUTS19|CBP|EIF4E1|EIF4EL1|EIF4F|eIF-4E	eukaryotic translation initiation factor 4E	eukaryotic translation initiation factor 4E|eIF-4F 25 kDa subunit|eukaryotic translation initiation factor 4E-like 1|mRNA cap-binding protein	NM_001130678.2	NP_001124150.1	NC_000004.12	protein-coding	REVIEWED	4	-	98871683	98930636	Reference GRCh38.p12 Primary Assembly
hsa-mir-411_20g	NM_001165924.1	1	593.2	593.2	5.08e-05	0.000402	1	1	6.54e-06	10	1	0	10	240	0	0	270.2	0	0	19	2723	9	18	1825	1834	10	10	0	read	NM_001165924.1	9606	2018	EMX2	-	empty spiracles homeobox 2	homeobox protein EMX2|empty spiracles homolog 2|empty spiracles-like protein 2	NM_001165924.1	NP_001159396.1	NC_000010.11	protein-coding	REVIEWED	10	+	117542444	117549545	Reference GRCh38.p12 Primary Assembly
hsa-mir-411_20g	NM_001318509.1	2	1160.2	611.9	1.66e-05	4.71e-05	3	3	2.18e-14	11	1	0	9	240	0	0	212.9	0	0	19	5349	10	18	539	547	9	9	0	read	NM_001318509.1	9606	2182	ACSL4	ACS4|FACL4|LACS4|MRX63|MRX68	acyl-CoA synthetase long chain family member 4	long-chain-fatty-acid--CoA ligase 4|LACS 4|acyl-CoA synthetase 4|fatty-acid-Coenzyme A ligase, long-chain 4|lignoceroyl-CoA synthase|long-chain acyl-CoA synthetase 4|long-chain fatty-acid-Coenzyme A ligase 4	NM_001318509.1	NP_001305438.1	NC_000023.11	protein-coding	REVIEWED	X	-	109641329	109733402	Reference GRCh38.p12 Primary Assembly
hsa-mir-411_20g	NM_001079802.1	1	645.3	645.3	6.49e-06	4.87e-05	4	4	0	7	1	0	19	244	12	0	189.3	0	0	19	7456	1	19	5585	5603	19	19	0	read	NM_001079802.1	9606	2218	FKTN	CMD1X|FCMD|LGMD2M|MDDGA4|MDDGB4|MDDGC4	fukutin	fukutin|Fukuyama type congenital muscular dystrophy protein|patient fukutin	NM_001079802.1	NP_001073270.1	NC_000009.12	protein-coding	REVIEWED	9	+	105558116	105655949	Reference GRCh38.p12 Primary Assembly
hsa-mir-411_20g	NM_004109.4	1	2670.8	2670.8	0	0	53	53	0	10	1	0	10	240	0	0	267.8	0	0	19	3155	9	18	386	395	10	10	0	read	NM_004109.4	9606	2230	FDX1	ADX|FDX|LOH11CR1D	ferredoxin 1	adrenodoxin, mitochondrial|adrenal ferredoxin|hepatoredoxin|mitochondrial adrenodoxin	NM_004109.4	NP_004100.1	NC_000011.10	protein-coding	REVIEWED	11	+	110429936	110464883	Reference GRCh38.p12 Primary Assembly
hsa-mir-411_20g	NM_001316772.1	1	930.6	930.6	5.13e-07	1.39e-05	9	9	0	9	1	0	14	240	0	0	292.6	0	0	19	2590	5	18	2462	2475	14	14	0	read	NM_001316772.1	9606	2617	GARS	CMT2D|DSMAV|GlyRS|HMN5|SMAD1	glycyl-tRNA synthetase	glycine--tRNA ligase|AP-4-A synthetase|Charcot-Marie-Tooth neuropathy 2D|Charcot-Marie-Tooth neuropathy, neuronal type, D|diadenosine tetraphosphate synthetase	NM_001316772.1	NP_001303701.1	NC_000007.14	protein-coding	REVIEWED	7	+	30594734	30634032	Reference GRCh38.p12 Primary Assembly
hsa-mir-411_20g	NM_001004106.2	1	619.7	619.7	1e-07	9.33e-07	3	3	2.18e-14	10.5	1	0	10	240	0	0	220.7	0	0	19	2950	9	18	1975	1984	10	10	0	read	NM_001004106.2	9606	2870	GRK6	GPRK6	G protein-coupled receptor kinase 6	G protein-coupled receptor kinase 6	NM_001004106.2	NP_001004106.1	NC_000005.10	protein-coding	REVIEWED	5	+	177426495	177442848	Reference GRCh38.p12 Primary Assembly
hsa-mir-411_20g	NM_001512.3	1	580.2	580.2	7.09e-05	0.00043	2	2	3.54e-10	8	1	0	17	244	12	0	205.2	0	0	19	1352	3	19	355	371	17	17	0	read	NM_001512.3	9606	2941	GSTA4	GSTA4-4|GTA4	glutathione S-transferase alpha 4	glutathione S-transferase A4|GST class-alpha member 4|S-(hydroxyalkyl)glutathione lyase A4|glutathione S-alkyltransferase A4|glutathione S-aralkyltransferase A4|glutathione S-aryltransferase A4|glutathione S-transferase A4-4|glutathione transferase A4-4	NM_001512.3	NP_001503.1	NC_000006.12	protein-coding	REVIEWED	6	-	52977947	52995379	Reference GRCh38.p12 Primary Assembly
hsa-mir-411_20g	NM_001289067.1	1	554.2	554.2	0.00279	0.00691	1	2	0.00175	10.5	1	0	10	240	0	0	235.2	0	0	19	3301	9	18	2886	2895	10	10	0	read	NM_001289067.1	9606	3070	HELLS	ICF4|LSH|Nbla10143|PASG|SMARCA6	helicase, lymphoid specific	lymphoid-specific helicase|SWI/SNF2-related, matrix-associated, actin-dependent regulator of chromatin, subfamily A, member 6|proliferation-associated SNF2-like protein	NM_001289067.1	NP_001275996.1	NC_000010.11	protein-coding	REVIEWED	10	+	94545766	94613904	Reference GRCh38.p12 Primary Assembly
hsa-mir-411_20g	NM_004514.3	1	632.6	632.6	7.55e-05	0.000971	3	3	2.18e-14	7.5	1	0	18	244	8	0	224.6	0	0	19	5262	2	19	5143	5160	18	18	0	read	NM_004514.3	9606	3607	FOXK2	ILF|ILF-1|ILF1	forkhead box K2	forkhead box protein K2|FOXK1|cellular transcription factor ILF-1|interleukin enhancer-binding factor 1	NM_004514.3	NP_004505.2	NC_000017.11	protein-coding	REVIEWED	17	+	82519717	82604606	Reference GRCh38.p12 Primary Assembly
hsa-mir-411_20g	NM_004521.2	1	1018.7	1018.7	1.68e-10	1.02e-08	13	14	0	9	1	0	14	152	0	0	309.7	0	0	19	5905	5	18	4899	4912	14	14	0	read	NM_004521.2	9606	3799	KIF5B	HEL-S-61|KINH|KNS|KNS1|UKHC	kinesin family member 5B	kinesin-1 heavy chain|conventional kinesin heavy chain|epididymis secretory protein Li 61|kinesin 1 (110-120kD)|kinesin heavy chain|ubiquitous kinesin heavy chain	NM_004521.2	NP_004512.1	NC_000010.11	protein-coding	VALIDATED	10	-	32009009	32056442	Reference GRCh38.p12 Primary Assembly
hsa-mir-411_20g	NM_002268.4	1	627.2	627.2	3.06e-06	2.86e-05	3	3	2.18e-14	6.5	1	0	19	244	16	0	203.2	0	0	19	8981	1	19	8845	8863	19	19	0	read	NM_002268.4	9606	3840	KPNA4	IPOA3|QIP1|SRP3	karyopherin subunit alpha 4	importin subunit alpha-3|importin alpha Q1|importin subunit alpha-4|karyopherin alpha 4 (importin alpha 3)	NM_002268.4	NP_002259.1	NC_000003.12	protein-coding	REVIEWED	3	-	160494994	160565587	Reference GRCh38.p12 Primary Assembly
hsa-mir-411_20g	NM_001270472.1	1	553.9	553.9	1.11e-06	3.8e-06	1	6	0.0949	11	1	0	8	312	0	0	161.9	0	0	19	3121	12	19	527	534	8	8	0	read	NM_001270472.1	9606	4172	MCM3	HCC5|P1-MCM3|P1.h|RLFB	minichromosome maintenance complex component 3	DNA replication licensing factor MCM3|DNA polymerase alpha holoenzyme-associated protein P1|DNA replication factor MCM3|MCM3 minichromosome maintenance deficient 3|RLF subunit beta|cervical cancer proto-oncogene 5|hRlf beta subunit|minichromosome maintenance deficient 3|p102|replication licensing factor, beta subunit	NM_001270472.1	NP_001257401.1	NC_000006.12	protein-coding	REVIEWED	6	-	52264013	52284880	Reference GRCh38.p12 Primary Assembly
hsa-mir-411_20g	NM_001135037.1	1	573.8	573.8	0.000236	0.00236	1	1	6.54e-06	8	1	0	15	244	0	0	244.8	0	0	19	4588	5	19	2768	2782	15	15	0	read	NM_001135037.1	9606	4238	MFAP3	-	microfibril associated protein 3	microfibril-associated glycoprotein 3|microfibrillar associated protein 3	NM_001135037.1	NP_001128509.1	NC_000005.10	protein-coding	VALIDATED	5	+	154038958	154057453	Reference GRCh38.p12 Primary Assembly
hsa-mir-411_20g	NM_001040000.2	2	1393.4	881.9	1.61e-09	1.53e-07	8	8	0	6	1	0	15	240	0	0	261.9	0	0	19	7629	4	18	2016	2030	15	15	0	read	NM_001040000.2	9606	4301	AFDN	AF6|MLL-AF6|MLLT4|l-afadin	afadin, adherens junction formation factor	afadin|ALL1-fused gene from chromosome 6 protein|myeloid/lymphoid or mixed-lineage leukemia (trithorax homolog, Drosophila); translocated to, 4|myeloid/lymphoid or mixed-lineage leukemia; translocated to, 4|protein AF-6	NM_001040000.2	NP_001035089.1	NC_000006.12	protein-coding	REVIEWED	6	+	167826871	167972022	Reference GRCh38.p12 Primary Assembly
hsa-mir-411_20g	NM_001300899.1	1	732	732	2.98e-08	1.59e-06	3	6	2.12e-07	11	1	0	8	312	0	0	260	0	0	19	8609	12	19	2953	2960	8	8	0	read	NM_001300899.1	9606	4646	MYO6	DFNA22|DFNB37|Myo6-007|Myo6-008	myosin VI	unconventional myosin-VI|myosin VI transcript variant 007|myosin VI transcript variant 008|unconventional myosin-6	NM_001300899.1	NP_001287828.1	NC_000006.12	protein-coding	REVIEWED	6	+	75749175	75919536	Reference GRCh38.p12 Primary Assembly
hsa-mir-411_20g	NM_005002.4	1	713.4	713.4	6.38e-07	1.08e-05	5	14	6.71e-08	11	1	0	9	252	0	0	224.4	0	0	19	1621	11	19	1260	1268	9	9	0	read	NM_005002.4	9606	4704	NDUFA9	CC6|CI-39k|CI39k|NDUFS2L|SDR22E1	NADH:ubiquinone oxidoreductase subunit A9	NADH dehydrogenase [ubiquinone] 1 alpha subcomplex subunit 9, mitochondrial|CI-39kD|NADH dehydrogenase (ubiquinone) 1 alpha subcomplex, 9, 39kDa|NADH dehydrogenase (ubiquinone) Fe-S protein 2-like (NADH-coenzyme Q reductase)|NADH-ubiquinone oxidoreductase 39 kDa subunit|complex I 39kDa subunit|short chain dehydrogenase/reductase family 22E, member 1	NM_005002.4	NP_004993.1	NC_000012.12	protein-coding	REVIEWED	12	+	4649097	4687553	Reference GRCh38.p12 Primary Assembly
hsa-mir-411_20g	NM_001173523.1	1	705.3	705.3	1.46e-06	3.47e-05	5	5	0	7	1	0	14	240	0	0	211.3	0	0	19	8728	5	18	4523	4536	14	14	0	read	NM_001173523.1	9606	5099	PCDH7	BH-Pcdh|BHPCDH|PPP1R120	protocadherin 7	protocadherin-7|BH-protocadherin (brain-heart)|brain-heart protocadherin|protein phosphatase 1, regulatory subunit 120	NM_001173523.1	NP_001166994.1	NC_000004.12	protein-coding	REVIEWED	4	+	30719860	31146800	Reference GRCh38.p12 Primary Assembly
hsa-mir-411_20g	NM_001242318.2	2	1071.1	543.3	0.191	0.243	1	1	6.54e-06	4.5	1	0	19	244	8	0	194.3	0	0	19	6641	1	19	2059	2077	19	19	0	read	NM_001242318.2	9606	5150	PDE7A	HCP1|PDE7	phosphodiesterase 7A	high affinity cAMP-specific 3',5'-cyclic phosphodiesterase 7A|TM22|phosphodiesterase isozyme 7	NM_001242318.2	NP_001229247.1	NC_000008.11	protein-coding	REVIEWED	8	-	65714333	65841733	Reference GRCh38.p12 Primary Assembly
hsa-mir-411_20g	NM_001261816.1	1	619.6	619.6	0.00033	0.0013	1	6	0.0949	9	1	0	15	244	0	0	299.6	0	0	19	7032	5	19	4891	4905	15	15	0	read	NM_001261816.1	9606	5170	PDPK1	PDK1|PDPK2|PDPK2P|PRO0461	3-phosphoinositide dependent protein kinase 1	3-phosphoinositide-dependent protein kinase 1|3-phosphoinositide-dependent protein kinase 2 pseudogene|PkB kinase like gene 1	NM_001261816.1	NP_001248745.1	NC_000016.10	protein-coding	VALIDATED	16	+	2537963	2603189	Reference GRCh38.p12 Primary Assembly
hsa-mir-411_20g	NM_000293.2	1	536.6	536.6	0.000234	0.000789	1	1	6.54e-06	8	1	0	17	240	12	0	203.6	0	0	19	5491	2	18	1883	1899	17	17	0	read	NM_000293.2	9606	5257	PHKB	-	phosphorylase kinase regulatory subunit beta	phosphorylase b kinase regulatory subunit beta|phosphorylase kinase beta-subunit|phosphorylase kinase subunit beta|phosphorylase kinase, beta	NM_000293.2	NP_000284.1	NC_000016.10	protein-coding	REVIEWED	16	+	47461130	47701522	Reference GRCh38.p12 Primary Assembly
hsa-mir-411_20g	NM_002736.2	1	575.2	575.2	3.57e-09	3.45e-08	1	1	6.54e-06	11.5	1	0	8	244	0	0	253.2	0	0	19	3678	12	19	1485	1492	8	8	0	read	NM_002736.2	9606	5577	PRKAR2B	PRKAR2|RII-BETA	protein kinase cAMP-dependent type II regulatory subunit beta	cAMP-dependent protein kinase type II-beta regulatory subunit|H_RG363E19.2|WUGSC:H_RG363E19.2|cAMP-dependent protein kinase type II-beta regulatory chain|protein kinase, cAMP-dependent, regulatory subunit type II beta|protein kinase, cAMP-dependent, regulatory, type II, beta	NM_002736.2	NP_002727.2	NC_000007.14	protein-coding	REVIEWED	7	+	107044727	107161810	Reference GRCh38.p12 Primary Assembly
hsa-mir-411_20g	NM_002752.4	1	731.1	731.1	1.79e-05	0.000362	6	6	0	11.5	1	0	8	244	0	0	209.1	0	0	19	4336	12	19	1468	1475	8	8	0	read	NM_002752.4	9606	5601	MAPK9	JNK-55|JNK2|JNK2A|JNK2ALPHA|JNK2B|JNK2BETA|PRKM9|SAPK|SAPK1a|p54a|p54aSAPK	mitogen-activated protein kinase 9	mitogen-activated protein kinase 9|Jun kinase|MAP kinase 9|MAPK 9|c-Jun N-terminal kinase 2|c-Jun kinase 2|stress-activated protein kinase 1a|stress-activated protein kinase JNK2	NM_002752.4	NP_002743.3	NC_000005.10	protein-coding	REVIEWED	5	-	180233593	180292070	Reference GRCh38.p12 Primary Assembly
hsa-mir-411_20g	NM_002788.3	1	887.3	887.3	3.8e-11	2.1e-09	9	14	0	10	1	0	11	244	0	0	245.3	0	0	19	1014	9	19	433	443	11	11	0	read	NM_002788.3	9606	5684	PSMA3	HC8|PSC3	proteasome subunit alpha 3	proteasome subunit alpha type-3|macropain subunit C8|multicatalytic endopeptidase complex subunit C8|proteasome (prosome, macropain) subunit, alpha type, 3|proteasome component C8|proteasome subunit C8|testicular secretory protein Li 43	NM_002788.3	NP_002779.1	NC_000014.9	protein-coding	REVIEWED	14	+	58244804	58272008	Reference GRCh38.p12 Primary Assembly
hsa-mir-411_20g	NM_006503.3	1	2640.8	2640.8	0	0	53	104	0	9.5	1	0	13	244	0	0	241.8	0	0	19	1914	7	19	1228	1240	13	13	0	read	NM_006503.3	9606	5704	PSMC4	MIP224|RPT3|S6|TBP-7|TBP7	proteasome 26S subunit, ATPase 4	26S proteasome regulatory subunit 6B|26S protease regulatory subunit 6B|26S proteasome AAA-ATPase subunit RPT3|MB67-interacting protein|Tat-binding protein 7|protease 26S subunit 6|proteasome (prosome, macropain) 26S subunit, ATPase, 4	NM_006503.3	NP_006494.1	NC_000019.10	protein-coding	REVIEWED	19	+	39971004	39981763	Reference GRCh38.p12 Primary Assembly
hsa-mir-411_20g	NM_001278708.1	1	674.5	674.5	1.66e-05	0.000205	5	6	0	7.5	1	0	16	244	0	0	188.5	0	0	19	2655	4	19	1345	1360	16	16	0	read	NM_001278708.1	9606	5708	PSMD2	P97|RPN1|S2|TRAP2	proteasome 26S subunit, non-ATPase 2	26S proteasome non-ATPase regulatory subunit 2|55.11 protein|TNFR-associated protein 2|proteasome (prosome, macropain) 26S subunit, non-ATPase, 2|protein 55.11|tumor necrosis factor type 1 receptor-associated protein 2	NM_001278708.1	NP_001265637.1	NC_000003.12	protein-coding	REVIEWED	3	+	184299097	184309053	Reference GRCh38.p12 Primary Assembly
hsa-mir-411_20g	NM_000314.6	1	568.6	568.6	0.000151	0.000923	1	1	6.54e-06	6.5	1	0	17	152	28	0	299.6	0	0	19	8718	2	18	5501	5517	17	17	0	read	NM_000314.6	9606	5728	PTEN	10q23del|BZS|CWS1|DEC|GLM2|MHAM|MMAC1|PTEN1|PTENbeta|TEP1	phosphatase and tensin homolog	phosphatidylinositol 3,4,5-trisphosphate 3-phosphatase and dual-specificity protein phosphatase PTEN|MMAC1 phosphatase and tensin homolog deleted on chromosome 10|mitochondrial PTENalpha|mitochondrial phosphatase and tensin protein alpha|mutated in multiple advanced cancers 1|phosphatase and tensin-like protein|phosphatidylinositol-3,4,5-trisphosphate 3-phosphatase and dual-specificity protein ph…	NM_000314.6	NP_000305.3	NC_000010.11	protein-coding	REVIEWED	10	+	87863437	87971929	Reference GRCh38.p12 Primary Assembly
hsa-mir-411_20g	NM_001242397.1	1	1427.6	1427.6	0.00577	0.231	22	26	0	5.5	1	0	19	244	16	0	240.6	0	0	19	3083	1	19	2778	2796	19	19	0	read	NM_001242397.1	9606	5756	TWF1	A6|PTK9	twinfilin actin binding protein 1	twinfilin-1|A6 protein tyrosine kinase|PTK9 protein tyrosine kinase 9|protein A6|protein tyrosine kinase 9|twinfilin, actin-binding protein, homolog 1	NM_001242397.1	NP_001229326.1	NC_000012.12	protein-coding	REVIEWED	12	-	43793722	43806374	Reference GRCh38.p12 Primary Assembly
hsa-mir-411_20g	NM_002853.3	1	544.7	544.7	0.000636	0.00212	1	1	6.54e-06	8	1	0	18	152	4	0	316.7	0	0	19	4683	1	18	4430	4447	18	18	0	read	NM_002853.3	9606	5810	RAD1	HRAD1|REC1	RAD1 checkpoint DNA exonuclease	cell cycle checkpoint protein RAD1|DNA repair exonuclease REC1|DNA repair exonuclease rad1 homolog|RAD1 checkpoint clamp component|RAD1 homolog|cell cycle checkpoint protein Hrad1|checkpoint control protein HRAD1|exonuclease homolog RAD1|rad1-like DNA damage checkpoint protein	NM_002853.3	NP_002844.1	NC_000005.10	protein-coding	REVIEWED	5	-	34905259	34915674	Reference GRCh38.p12 Primary Assembly
hsa-mir-411_20g	NM_005859.4	1	767.4	767.4	3.16e-08	1.15e-06	6	13	4.94e-12	9	1	0	12	240	0	0	242.4	0	0	19	5304	7	18	1236	1247	12	12	0	read	NM_005859.4	9606	5813	PURA	MRD31|PUR-ALPHA|PUR1|PURALPHA	purine rich element binding protein A	transcriptional activator protein Pur-alpha|purine-rich single-stranded DNA-binding protein alpha	NM_005859.4	NP_005850.1	NC_000005.10	protein-coding	REVIEWED	5	+	140114122	140119415	Reference GRCh38.p12 Primary Assembly
hsa-mir-411_20g	NM_001042603.2	1	619.8	619.8	0.000175	0.00149	2	3	4.77e-07	7	1	0	19	244	16	0	241.8	0	0	19	10836	1	19	7766	7784	19	19	0	read	NM_001042603.2	9606	5927	KDM5A	RBBP-2|RBBP2|RBP2	lysine demethylase 5A	lysine-specific demethylase 5A|Jumonji, AT rich interactive domain 1A (RBP2-like)|histone demethylase JARID1A|jumonji/ARID domain-containing protein 1A|lysine (K)-specific demethylase 5A|retinoblastoma binding protein 2	NM_001042603.2	NP_001036068.1	NC_000012.12	protein-coding	REVIEWED	12	-	280056	389454	Reference GRCh38.p12 Primary Assembly
hsa-mir-411_20g	NM_001135255.1	1	693.3	693.3	1.36e-07	2.12e-06	3	3	2.18e-14	9.5	1	0	12	240	0	0	293.3	0	0	19	7940	7	18	6162	6173	12	12	0	read	NM_001135255.1	9606	5928	RBBP4	NURF55|RBAP48|lin-53	RB binding protein 4, chromatin remodeling factor	histone-binding protein RBBP4|CAF-1 subunit C|CAF-I 48 kDa subunit|CAF-I p48|MSI1 protein homolog|RBBP-4|chromatin assembly factor 1 subunit C|chromatin assembly factor I p48 subunit|chromatin assembly factor/CAF-1 p48 subunit|nucleosome-remodeling factor subunit RBAP48|retinoblastoma-binding protein 4|retinoblastoma-binding protein p48	NM_001135255.1	NP_001128727.1	NC_000001.11	protein-coding	REVIEWED	1	+	32651147	32686210	Reference GRCh38.p12 Primary Assembly
hsa-mir-411_20g	NM_002898.3	1	516.4	516.4	8.3e-05	0.000159	1	1	6.54e-06	7.5	1	0	16	240	0	0	188.4	0	0	19	8504	3	18	7035	7050	16	16	0	read	NM_002898.3	9606	5939	RBMS2	SCR3	RNA binding motif single stranded interacting protein 2	RNA-binding motif, single-stranded-interacting protein 2|suppressor of CDC2 with RNA-binding motif 3	NM_002898.3	NP_002889.1	NC_000012.12	protein-coding	REVIEWED	12	+	56520405	56596195	Reference GRCh38.p12 Primary Assembly
hsa-mir-411_20g	NM_001185009.2	1	574.9	574.9	5.79e-05	0.000259	1	1	6.54e-06	11	1	0	9	240	0	0	255.9	0	0	19	3493	10	18	3161	3169	9	9	0	read	NM_001185009.2	9606	6047	RNF4	RES4-26|SLX5|SNURF	ring finger protein 4	E3 ubiquitin-protein ligase RNF4|E3 ubiquitin ligase RNF4|RING-type E3 ubiquitin transferase RNF4|small nuclear RING finger protein	NM_001185009.2	NP_001171938.1	NC_000004.12	protein-coding	REVIEWED	4	+	2469067	2515858	Reference GRCh38.p12 Primary Assembly
hsa-mir-411_20g	NM_002950.3	1	606.6	606.6	0.000337	0.00325	2	2	3.54e-10	8	1	0	12	320	0	0	152.6	0	0	19	2372	8	19	1348	1359	12	12	11	read	NM_002950.3	9606	6184	RPN1	OST1|RBPH1	ribophorin I	dolichyl-diphosphooligosaccharide--protein glycosyltransferase subunit 1|RPN-I|dolichyl-diphosphooligosaccharide-protein glycosyltransferase 67 kDa subunit|oligosaccharyltransferase 1 homolog|oligosaccharyltransferase complex subunit (non-catalytic)|ribophorin-1	NM_002950.3	NP_002941.1	NC_000003.12	protein-coding	REVIEWED	3	-	128619969	128650875	Reference GRCh38.p12 Primary Assembly
hsa-mir-411_20g	NM_001308122.1	1	517.3	517.3	0.000204	0.000355	1	1	6.54e-06	6	1	0	17	244	12	0	165.3	0	0	19	3371	3	19	1254	1270	17	17	0	read	NM_001308122.1	9606	6584	SLC22A5	CDSP|OCTN2	solute carrier family 22 member 5	solute carrier family 22 member 5|high-affinity sodium dependent carnitine cotransporter|organic cation/carnitine transporter 2	NM_001308122.1	NP_001295051.1	NC_000005.10	protein-coding	REVIEWED	5	+	132369703	132395613	Reference GRCh38.p12 Primary Assembly
hsa-mir-411_20g	NM_003090.3	1	764.6	764.6	5.8e-12	1.55e-10	7	15	6.59e-14	10	1	0	12	152	0	0	299.6	0	0	19	1103	7	18	1061	1072	12	12	0	read	NM_003090.3	9606	6627	SNRPA1	Lea1|U2A'	small nuclear ribonucleoprotein polypeptide A'	U2 small nuclear ribonucleoprotein A'|U2 small nuclear ribonucleoprotein polypeptide A'|U2 snRNP A'	NM_003090.3	NP_003081.2	NC_000015.10	protein-coding	VALIDATED	15	-	101281509	101295281	Reference GRCh38.p12 Primary Assembly
hsa-mir-411_20g	NR_028597.1	1	522.2	522.2	2.62e-09	4.73e-09	1	1	6.54e-06	11	1	0	8	312	0	0	130.2	0	0	19	2155	12	19	355	362	8	8	0	read	NR_028597.1	9606	6719	SRD5A1P1	SRD5AP1	steroid 5 alpha-reductase 1 pseudogene 1	steroid 5 alpha-reductase A1 pseudogene 1|steroid-5-alpha-reductase 1 pseudogene|steroid-5-alpha-reductase, alpha polypeptide 1 (3-oxo-5 alpha-steroid delta 4-dehydrogenase alpha 1) pseudogene|steroid-5-alpha-reductase, alpha polypeptide 1 pseudogene 1 (3-oxo-5 alpha-steroid delta 4-dehydrogenase alpha pseudogene)|steroid-5-alpha-reductase, alpha polypeptide pseudogene 1 (3-oxo-5 alpha-steroid de…	NR_028597.1	-	NC_000023.11	pseudo	PROVISIONAL	X	+	139446818	139448972	Reference GRCh38.p12 Primary Assembly
hsa-mir-411_20g	NM_001294145.1	1	536.4	536.4	0.000119	0.000289	1	1	6.54e-06	7	1	0	17	248	16	0	187.4	0	0	19	2043	2	18	1800	1816	17	17	0	read	NM_001294145.1	9606	6741	SSB	LARP3|La|La/SSB	Sjogren syndrome antigen B	lupus La protein|La ribonucleoprotein domain family, member 3|SS-B|SS-B/La protein|autoantigen La|la autoantigen|lupus La antigen|sjoegren syndrome type B antigen	NM_001294145.1	NP_001281074.1	NC_000002.12	protein-coding	REVIEWED	2	+	169798811	169812063	Reference GRCh38.p12 Primary Assembly
hsa-mir-411_20g	NM_001301683.1	1	635	635	0.000629	0.00463	3	3	2.18e-14	7.5	1	0	18	244	4	0	228	0	0	19	2665	2	19	1904	1921	18	18	0	read	NM_001301683.1	9606	6832	SUPV3L1	SUV3	Suv3 like RNA helicase	ATP-dependent RNA helicase SUPV3L1, mitochondrial|SUV3-like helicase|SUV3-like protein 1|suppressor of var1, 3-like 1|suppressor of var1, 3-like 1(SUV3)	NM_001301683.1	NP_001288612.1	NC_000010.11	protein-coding	VALIDATED	10	+	69180203	69209097	Reference GRCh38.p12 Primary Assembly
hsa-mir-411_20g	NR_138148.1	3	1183.8	576	0.00256	0.00644	2	2	3.54e-10	9.5	1	0	14	152	0	0	310	0	0	19	5817	5	18	1395	1408	14	14	0	read	NR_138148.1	9606	7042	TGFB2	G-TSF|LDS4|TGF-beta2	transforming growth factor beta 2	transforming growth factor beta-2|BSC-1 cell growth inhibitor|cetermin|glioblastoma-derived T-cell suppressor factor|polyergin|prepro-transforming growth factor beta-2	NR_138148.1	-	NC_000001.11	protein-coding	REVIEWED	1	+	218345283	218444618	Reference GRCh38.p12 Primary Assembly
hsa-mir-411_20g	NM_001353684.1	1	552.7	552.7	4.17e-13	1.25e-12	1	1	6.54e-06	7	1	0	17	240	8	0	218.7	0	0	19	4231	2	18	3572	3588	17	17	0	read	NM_001353684.1	9606	7074	TIAM1	TIAM-1	T cell lymphoma invasion and metastasis 1	T-lymphoma invasion and metastasis-inducing protein 1|human T-lymphoma invasion and metastasis inducing TIAM1 protein	NM_001353684.1	NP_001340613.1	NC_000021.9	protein-coding	REVIEWED	21	-	31118417	31559976	Reference GRCh38.p12 Primary Assembly
hsa-mir-411_20g	NM_001067.3	1	566.2	566.2	4.93e-05	0.000251	2	2	3.54e-10	10	1	0	11	244	0	0	204.2	0	0	19	5753	9	19	5082	5092	11	11	0	read	NM_001067.3	9606	7153	TOP2A	TOP2|TP2A	DNA topoisomerase II alpha	DNA topoisomerase 2-alpha|DNA gyrase|DNA topoisomerase (ATP-hydrolyzing)|DNA topoisomerase II, 170 kD|DNA topoisomerase II, alpha isozyme|topoisomerase (DNA) II alpha 170kDa	NM_001067.3	NP_001058.2	NC_000017.11	protein-coding	REVIEWED	17	-	40388520	40417949	Reference GRCh38.p12 Primary Assembly
hsa-mir-411_20g	NM_000371.3	1	526.5	526.5	0.000203	0.000336	1	1	6.54e-06	7.5	1	0	17	152	20	0	271.5	0	0	19	938	2	18	724	740	17	17	0	read	NM_000371.3	9606	7276	TTR	ATTR|CTS|CTS1|HEL111|HsT2651|PALB|TBPA	transthyretin	transthyretin|epididymis luminal protein 111|prealbumin, amyloidosis type I|thyroxine-binding prealbumin	NM_000371.3	NP_000362.1	NC_000018.10	protein-coding	REVIEWED	18	+	31591766	31599023	Reference GRCh38.p12 Primary Assembly
hsa-mir-411_20g	NM_001042498.2	1	628.1	628.1	6.75e-08	9e-07	3	3	2.18e-14	5	1	0	19	244	12	0	193.1	0	0	19	2619	1	19	1232	1250	19	19	0	read	NM_001042498.2	9606	7355	SLC35A2	CDG2M|CDGX|UDP-Gal-Tr|UGALT|UGAT|UGT|UGT1|UGT2|UGTL	solute carrier family 35 member A2	UDP-galactose translocator|solute carrier family 35 (UDP-galactose transporter), member 2|solute carrier family 35 (UDP-galactose transporter), member A2	NM_001042498.2	NP_001035963.1	NC_000023.11	protein-coding	REVIEWED	X	-	48903179	48911957	Reference GRCh38.p12 Primary Assembly
hsa-mir-411_20g	NM_000551.3	2	1144.4	602.1	7.51e-07	7.62e-06	3	3	2.18e-14	8	1	0	18	152	8	0	290.1	0	0	19	4560	1	18	2259	2276	18	18	0	read	NM_000551.3	9606	7428	VHL	HRCA1|RCA1|VHL1|pVHL	von Hippel-Lindau tumor suppressor	von Hippel-Lindau disease tumor suppressor|elongin binding protein|protein G7|von Hippel-Lindau tumor suppressor, E3 ubiquitin protein ligase	NM_000551.3	NP_000542.1	NC_000003.12	protein-coding	REVIEWED	3	+	10141634	10153669	Reference GRCh38.p12 Primary Assembly
hsa-mir-411_20g	NM_004184.3	1	525.7	525.7	6.76e-08	1.43e-07	1	1	6.54e-06	9	1	0	12	240	0	0	200.7	0	0	19	2884	7	18	2460	2471	12	12	0	read	NM_004184.3	9606	7453	WARS	GAMMA-2|HMN9|IFI53|IFP53	tryptophanyl-tRNA synthetase	tryptophan--tRNA ligase, cytoplasmic|hWRS|interferon-induced protein 53|trpRS|tryptophan tRNA ligase 1, cytoplasmic	NM_004184.3	NP_004175.2	NC_000014.9	protein-coding	REVIEWED	14	-	100333787	100376342	Reference GRCh38.p12 Primary Assembly
hsa-mir-411_20g	NM_001077269.1	1	543	543	6.28e-05	0.000188	1	1	6.54e-06	11	1	0	9	252	0	0	214	0	0	19	4664	11	19	3070	3078	9	9	0	read	NM_001077269.1	9606	7456	WIPF1	PRPL-2|WAS2|WASPIP|WIP	WAS/WASL interacting protein family member 1	WAS/WASL-interacting protein family member 1|WASP-interacting protein|Wiskott-Aldrich syndrome protein interacting protein|protein PRPL-2|testicular tissue protein Li 226	NM_001077269.1	NP_001070737.1	NC_000002.12	protein-coding	REVIEWED	2	-	174559573	174682898	Reference GRCh38.p12 Primary Assembly
hsa-mir-411_20g	NM_021141.3	1	601.8	601.8	0.000267	0.00181	2	2	3.54e-10	6.5	1	0	19	244	16	0	217.8	0	0	19	3448	1	19	704	722	19	19	0	read	NM_021141.3	9606	7520	XRCC5	KARP-1|KARP1|KU80|KUB2|Ku86|NFIV	X-ray repair cross complementing 5	X-ray repair cross-complementing protein 5|86 kDa subunit of Ku antigen|ATP-dependent DNA helicase 2 subunit 2|ATP-dependent DNA helicase II 80 kDa subunit|CTC box-binding factor 85 kDa subunit|CTC85|CTCBF|DNA repair protein XRCC5|Ku autoantigen, 80kDa|Ku86 autoantigen related protein 1|TLAA|X-ray repair complementing defective repair in Chinese hamster cells 5 (double-strand-break rejoining)|lup…	NM_021141.3	NP_066964.1	NC_000002.12	protein-coding	REVIEWED	2	+	216109296	216206292	Reference GRCh38.p12 Primary Assembly
hsa-mir-411_20g	NM_001324139.1	1	605.7	605.7	2.01e-05	4.71e-05	3	3	2.18e-14	9.5	1	0	12	244	0	0	199.7	0	0	19	4666	8	19	2567	2578	12	12	0	read	NM_001324139.1	9606	7592	ZNF41	MRX89	zinc finger protein 41	zinc finger protein 41	NM_001324139.1	NP_001311068.1	NC_000023.11	protein-coding	REVIEWED	X	-	47444690	47485933	Reference GRCh38.p12 Primary Assembly
hsa-mir-411_20g	NM_003425.3	1	646.2	646.2	1.02e-05	0.000161	4	4	0	9.5	1	0	12	252	0	0	194.2	0	0	19	3903	8	19	3397	3408	12	12	0	read	NM_003425.3	9606	7596	ZNF45	KOX5|ZNF13	zinc finger protein 45	zinc finger protein 45|BRC1744|zinc finger protein 13|zinc finger protein 45 (a Kruppel-associated box (KRAB) domain polypeptide)|zinc finger protein KOX5	NM_003425.3	NP_003416.1	NC_000019.10	protein-coding	VALIDATED	19	-	43912623	43935314	Reference GRCh38.p12 Primary Assembly
hsa-mir-411_20g	NM_001105537.2	1	637.5	637.5	8.76e-10	1.04e-08	3	3	2.18e-14	6	1	0	18	240	12	0	214.5	0	0	19	5942	1	18	4203	4220	18	18	0	read	NM_001105537.2	9606	7701	ZNF142	pHZ-49	zinc finger protein 142	zinc finger protein 142|HA4654|zinc finger protein 142 (clone pHZ-49)	NM_001105537.2	NP_001099007.1	NC_000002.12	protein-coding	REVIEWED	2	-	218637915	218659631	Reference GRCh38.p12 Primary Assembly
hsa-mir-411_20g	NM_001321645.1	1	624.2	624.2	0.000251	0.00254	1	1	6.54e-06	11	1	0	8	312	0	0	232.2	0	0	19	4035	12	19	2868	2875	8	8	0	read	NM_001321645.1	9606	7767	ZNF224	BMZF-2|BMZF2|KOX22|ZNF233|ZNF255|ZNF27	zinc finger protein 224	zinc finger protein 224|bone marrow zinc finger 2|zinc finger protein 233|zinc finger protein 255|zinc finger protein 27|zinc finger protein KOX22	NM_001321645.1	NP_001308574.1	NC_000019.10	protein-coding	REVIEWED	19	+	44094328	44109830	Reference GRCh38.p12 Primary Assembly
hsa-mir-411_20g	NM_001007257.2	1	712.4	712.4	6.11e-08	1.19e-06	5	5	0	6.5	1	0	18	244	16	0	207.4	0	0	19	6206	2	19	5662	5679	18	18	0	read	NM_001007257.2	9606	7799	PRDM2	HUMHOXY1|KMT8|KMT8A|MTB-ZF|RIZ|RIZ1|RIZ2	PR/SET domain 2	PR domain zinc finger protein 2|GATA-3 binding protein G3B|MTE-binding protein|PR domain 2|PR domain containing 2, with ZNF domain|PR domain-containing protein 2|lysine N-methyltransferase 8|retinoblastoma protein-binding zinc finger protein|retinoblastoma protein-interacting zinc finger protein|zinc finger protein RIZ|zinc-finger DNA-binding protein	NM_001007257.2	NP_001007258.1	NC_000001.11	protein-coding	REVIEWED	1	+	13698873	13825078	Reference GRCh38.p12 Primary Assembly
hsa-mir-411_20g	NM_022041.3	1	655.1	655.1	1.48e-06	2.29e-05	1	1	6.54e-06	5	1	1	17	312	24	0	234.1	0	0	19	4544	3	19	1495	1510	17	16	0	read	NM_022041.3	9606	8139	GAN	GAN1|KLHL16	gigaxonin	gigaxonin|kelch-like family member 16|kelch-like protein 16	NM_022041.3	NP_071324.1	NC_000016.10	protein-coding	REVIEWED	16	+	81314940	81380197	Reference GRCh38.p12 Primary Assembly
hsa-mir-411_20g	NM_001146702.1	1	598.5	598.5	2.52e-05	5.63e-05	3	3	2.18e-14	11.5	1	0	8	244	0	0	196.5	0	0	19	6097	12	19	4063	4070	8	8	0	read	NM_001146702.1	9606	8242	KDM5C	DXS1272E|JARID1C|MRX13|MRXJ|MRXSCJ|MRXSJ|SMCX|XE169	lysine demethylase 5C	lysine-specific demethylase 5C|JmjC domain-containing protein SMCX|Jumonji, AT rich interactive domain 1C (RBP2-like)|Jumonji/ARID domain-containing protein 1C|Smcx homolog, X chromosome|Smcy homolog, X-linked|histone demethylase JARID1C|lysine (K)-specific demethylase 5C	NM_001146702.1	NP_001140174.1	NC_000023.11	protein-coding	REVIEWED	X	-	53159734	53225421	Reference GRCh38.p12 Primary Assembly
hsa-mir-411_20g	NM_001164615.1	1	844.9	844.9	7.92e-07	2.51e-05	6	12	4.26e-13	11	1	0	8	312	0	0	252.9	0	0	19	3779	12	19	3111	3118	8	8	0	read	NM_001164615.1	9606	8323	FZD6	FZ-6|FZ6|HFZ6|NDNC10	frizzled class receptor 6	frizzled-6|frizzled 6, seven transmembrane spanning receptor|frizzled family receptor 6|frizzled homolog 6|seven transmembrane helix receptor	NM_001164615.1	NP_001158087.1	NC_000008.11	protein-coding	REVIEWED	8	+	103298432	103332865	Reference GRCh38.p12 Primary Assembly
hsa-mir-411_20g	NM_001330689.1	1	585.7	585.7	1.3e-07	8.67e-07	2	4	1.82e-05	5.5	1	1	18	244	20	0	204.7	0	0	19	3772	2	19	2379	2395	18	17	0	read	NM_001330689.1	9606	8394	PIP5K1A	-	phosphatidylinositol-4-phosphate 5-kinase type 1 alpha	phosphatidylinositol 4-phosphate 5-kinase type-1 alpha|68 kDa type I phosphatidylinositol 4-phosphate 5-kinase alpha|PIP5K1-alpha|PIP5KIalpha|phosphatidylinositol 4-phosphate 5-kinase type I alpha|ptdIns(4)P-5-kinase 1 alpha	NM_001330689.1	NP_001317618.1	NC_000001.11	protein-coding	VALIDATED	1	+	151197953	151249535	Reference GRCh38.p12 Primary Assembly
hsa-mir-411_20g	NM_003584.2	1	693.5	693.5	1.23e-08	4.26e-07	4	4	0	7.5	1	0	18	244	8	0	240.5	0	0	19	1639	2	19	621	638	18	18	0	read	NM_003584.2	9606	8446	DUSP11	PIR1	dual specificity phosphatase 11	RNA/RNP complex-1-interacting phosphatase|RNA/RNP complex 1-interacting|RNA/RNP complex-interacting phosphatase|dual specificity protein phosphatase 11|phosphatase that interacts with RNA/RNP complex 1|serine/threonine specific protein phosphatase	NM_003584.2	NP_003575.2	NC_000002.12	protein-coding	REVIEWED	2	-	73762197	73780156	Reference GRCh38.p12 Primary Assembly
hsa-mir-411_20g	NM_001198777.1	1	517	517	0.204	0.243	1	1	6.54e-06	11.5	1	0	8	244	0	0	195	0	0	19	4246	12	19	1147	1154	8	8	0	read	NM_001198777.1	9606	8453	CUL2	-	cullin 2	cullin-2|CUL-2|testis secretory sperm-binding protein Li 238E	NM_001198777.1	NP_001185706.1	NC_000010.11	protein-coding	VALIDATED	10	-	35008550	35126898	Reference GRCh38.p12 Primary Assembly
hsa-mir-411_20g	NM_003647.2	1	556.6	556.6	0.000142	0.000682	2	2	3.54e-10	6.5	1	0	18	152	20	0	259.6	0	0	19	7784	1	18	3783	3800	18	18	0	read	NM_003647.2	9606	8526	DGKE	AHUS7|DAGK5|DAGK6|DGK|NPHS7	diacylglycerol kinase epsilon	diacylglycerol kinase epsilon|DAG kinase epsilon|DGK-epsilon|diacylglycerol kinase, epsilon 64kDa|diglyceride kinase epsilon	NM_003647.2	NP_003638.1	NC_000017.11	protein-coding	REVIEWED	17	+	56834098	56869566	Reference GRCh38.p12 Primary Assembly
hsa-mir-411_20g	NM_001320687.1	1	872.6	872.6	4.28e-07	4.67e-05	9	9	0	7	1	0	18	240	28	0	202.6	0	0	19	6342	1	18	1740	1757	18	18	0	read	NM_001320687.1	9606	8554	PIAS1	DDXBP1|GBP|GU/RH-II|ZMIZ3	protein inhibitor of activated STAT 1	E3 SUMO-protein ligase PIAS1|AR interacting protein|DEAD/H (Asp-Glu-Ala-Asp/His) box binding protein 1|DEAD/H box-binding protein 1|E3 SUMO-protein transferase PIAS1|RNA helicase II-binding protein|gu-binding protein|protein inhibitor of activated STAT protein 1|zinc finger, MIZ-type containing 3	NM_001320687.1	NP_001307616.1	NC_000015.10	protein-coding	REVIEWED	15	+	68054178	68191463	Reference GRCh38.p12 Primary Assembly
hsa-mir-411_20g	NM_001005417.2	1	558.4	558.4	3.21e-05	0.000121	1	7	0.13	4.5	1	0	19	252	60	0	146.4	0	0	19	2009	1	19	635	653	19	19	0	read	NM_001005417.2	9606	8704	B4GALT2	B4Gal-T2|B4Gal-T3|beta4Gal-T2	beta-1,4-galactosyltransferase 2	beta-1,4-galactosyltransferase 2|UDP-Gal:beta-GlcNAc beta-1,4-galactosyltransferase 2|UDP-Gal:betaGlcNAc beta 1,4- galactosyltransferase 2|UDP-Gal:betaGlcNAc beta 1,4-galactosyltransferase, polypeptide 2|UDP-galactose:beta-N-acetylglucosamine beta-1,4-galactosyltransferase 2|beta-1,4-GalTase 2|beta-4-GalT2|beta-N-acetylglucosaminyl-glycolipid beta-1,4-galactosyltransferase 2	NM_001005417.2	NP_001005417.1	NC_000001.11	protein-coding	REVIEWED	1	+	43979201	43991170	Reference GRCh38.p12 Primary Assembly
hsa-mir-411_20g	NM_001308043.1	1	561	561	0.00329	0.00739	1	1	6.54e-06	10	1	0	12	244	0	0	242	0	0	19	4718	8	19	4570	4581	12	12	0	read	NM_001308043.1	9606	8837	CFLAR	CASH|CASP8AP1|CLARP|Casper|FLAME|FLAME-1|FLAME1|FLIP|I-FLICE|MRIT|c-FLIP|c-FLIPL|c-FLIPR|c-FLIPS	CASP8 and FADD like apoptosis regulator	CASP8 and FADD-like apoptosis regulator|FADD-like antiapoptotic molecule 1|MACH-related inducer of toxicity|caspase homolog|caspase-eight-related protein|caspase-like apoptosis regulatory protein|caspase-related inducer of apoptosis|cellular FLICE-like inhibitory protein|inhibitor of FLICE|testis secretory sperm-binding protein Li 233m|usurpin beta	NM_001308043.1	NP_001294972.1	NC_000002.12	protein-coding	REVIEWED	2	+	201116103	201172687	Reference GRCh38.p12 Primary Assembly
hsa-mir-411_20g	NM_022817.2	1	565.2	565.2	1.93e-05	8.53e-05	1	1	6.54e-06	7	1	0	17	244	20	0	215.2	0	0	19	6342	3	19	5654	5670	17	17	0	read	NM_022817.2	9606	8864	PER2	FASPS|FASPS1	period circadian regulator 2	period circadian protein homolog 2|circadian clock protein PERIOD 2|hPER2|period 2|period circadian clock 2|period circadian protein 2|period homolog 2	NM_022817.2	NP_073728.1	NC_000002.12	protein-coding	REVIEWED	2	-	238244037	238290101	Reference GRCh38.p12 Primary Assembly
hsa-mir-411_20g	NM_004686.4	1	563.6	563.6	0.000393	0.00172	1	1	6.54e-06	7.5	1	0	18	240	4	0	236.6	0	0	19	5302	1	18	3935	3952	18	18	0	read	NM_004686.4	9606	9108	MTMR7	-	myotubularin related protein 7	myotubularin-related protein 7	NM_004686.4	NP_004677.3	NC_000008.11	protein-coding	REVIEWED	8	-	17296127	17413530	Reference GRCh38.p12 Primary Assembly
hsa-mir-411_20g	NM_004218.3	1	875.6	875.6	1.16e-12	5.8e-11	10	10	0	8.5	1	0	16	244	0	0	194.6	0	0	19	1635	4	19	559	574	16	16	0	read	NM_004218.3	9606	9230	RAB11B	H-YPT3|NDAGSCW	RAB11B, member RAS oncogene family	ras-related protein Rab-11B|GTP-binding protein YPT3|RAB11B, member of RAS oncogene family	NM_004218.3	NP_004209.2	NC_000019.10	protein-coding	VALIDATED	19	+	8390320	8404433	Reference GRCh38.p12 Primary Assembly
hsa-mir-411_20g	NM_004229.3	2	1064.1	577.2	6.98e-07	3.4e-06	1	2	0.00175	9.5	1	0	12	240	0	0	257.2	0	0	19	6768	7	18	2321	2332	12	12	0	read	NM_004229.3	9606	9282	MED14	CRSP150|CRSP2|CSRP|CXorf4|DRIP150|EXLM1|RGR1|TRAP170	mediator complex subunit 14	mediator of RNA polymerase II transcription subunit 14|ARC150|CRSP complex subunit 2|RGR1 homolog|activator-recruited cofactor 150 kDa component|cofactor required for Sp1 transcriptional activation, subunit 2 (150kD)|hRGR1|human homolog of yeast RGR1|thyroid hormone receptor-associated protein complex 170 kDa component|thyroid hormone receptor-associated protein complex component TRAP170|transcri…	NM_004229.3	NP_004220.2	NC_000023.11	protein-coding	REVIEWED	X	-	40649542	40736121	Reference GRCh38.p12 Primary Assembly
hsa-mir-411_20g	NM_001001484.2	1	592.6	592.6	0.00109	0.00661	1	1	6.54e-06	6	1	0	18	244	20	0	234.6	0	0	19	3826	2	19	1391	1408	18	18	0	read	NM_001001484.2	9606	9317	PTER	HPHRP|RPR-1	phosphotriesterase related	phosphotriesterase-related protein|parathion hydrolase-related protein|resiniferatoxin-binding, phosphotriesterase-related	NM_001001484.2	NP_001001484.1	NC_000010.11	protein-coding	VALIDATED	10	+	16436942	16517961	Reference GRCh38.p12 Primary Assembly
hsa-mir-411_20g	NM_015080.3	1	520.4	520.4	0.00037	0.000682	1	1	6.54e-06	8.5	1	0	14	244	0	0	195.4	0	0	19	6639	6	19	5940	5953	14	14	0	read	NM_015080.3	9606	9379	NRXN2	-	neurexin 2	neurexin-2-beta|neurexin II	NM_015080.3	NP_055895.1	NC_000011.10	protein-coding	REVIEWED	11	-	64606173	64723187	Reference GRCh38.p12 Primary Assembly
hsa-mir-411_20g	NM_001100164.1	1	587.8	587.8	0.000166	0.00236	1	3	0.0122	10	1	0	12	244	0	0	267.8	0	0	19	9642	8	19	9036	9047	12	12	0	read	NM_001100164.1	9606	9749	PHACTR2	C6orf56	phosphatase and actin regulator 2	phosphatase and actin regulator 2	NM_001100164.1	NP_001093634.1	NC_000006.12	protein-coding	VALIDATED	6	+	143608179	143831184	Reference GRCh38.p12 Primary Assembly
hsa-mir-411_20g	NM_001256864.1	1	534.9	534.9	2.61e-07	5.98e-07	1	1	6.54e-06	7	1	0	15	244	0	0	195.9	0	0	19	5968	5	19	859	873	15	15	0	read	NM_001256864.1	9606	9829	DNAJC6	DJC6|PARK19	DnaJ heat shock protein family (Hsp40) member C6	putative tyrosine-protein phosphatase auxilin|DnaJ (Hsp40) homolog, subfamily B, member 6|DnaJ (Hsp40) homolog, subfamily C, member 6|auxilin	NM_001256864.1	NP_001243793.1	NC_000001.11	protein-coding	REVIEWED	1	+	65264693	65415868	Reference GRCh38.p12 Primary Assembly
hsa-mir-411_20g	NM_001009554.3	1	548.6	548.6	0.00307	0.00691	1	1	6.54e-06	11	1	0	8	248	0	0	218.6	0	0	19	5850	11	18	2078	2085	8	8	0	read	NM_001009554.3	9606	9848	MFAP3L	NYD-sp9	microfibril associated protein 3 like	microfibrillar-associated protein 3-like|microfi brillar-associated protein 3-like|microfibrillar associated protein 3 like|testis development protein NYD-SP9	NM_001009554.3	NP_001009554.1	NC_000004.12	protein-coding	VALIDATED	4	-	169986596	170033027	Reference GRCh38.p12 Primary Assembly
hsa-mir-411_20g	NM_001039479.1	1	539.7	539.7	0.000157	0.000381	1	1	6.54e-06	5	1	1	17	240	36	0	176.7	0	0	19	5445	2	18	1360	1375	17	16	0	read	NM_001039479.1	9606	9870	AREL1	FIEL1|KIAA0317	apoptosis resistant E3 ubiquitin protein ligase 1	apoptosis-resistant E3 ubiquitin protein ligase 1|apoptosis-resistant HECT-type E3 ubiquitin transferase 1|fibrosis-inducing E3 ligase 1	NM_001039479.1	NP_001034568.1	NC_000014.9	protein-coding	VALIDATED	14	-	74661251	74713117	Reference GRCh38.p12 Primary Assembly
hsa-mir-411_20g	NM_005110.3	2	1896.3	1394.7	0	0	23	108	3.89e-15	9	1	0	16	244	0	0	195.7	0	0	19	3115	4	19	2457	2472	16	16	0	read	NM_005110.3	9606	9945	GFPT2	GFAT|GFAT 2|GFAT2	glutamine-fructose-6-phosphate transaminase 2	glutamine--fructose-6-phosphate aminotransferase [isomerizing] 2|D-fructose-6-phosphate amidotransferase 2|glucosamine--fructose-6-phosphate aminotransferase [isomerizing] 2|glutamine: fructose-6-phosphate aminotransferase 2|glutamine:fructose-6-phosphate amidotransferase 2|hexosephosphate aminotransferase 2	NM_005110.3	NP_005101.1	NC_000005.10	protein-coding	VALIDATED	5	-	180300689	180353386	Reference GRCh38.p12 Primary Assembly
hsa-mir-411_20g	NM_005121.2	1	639.7	639.7	0.000205	0.00261	2	2	3.54e-10	4.5	1	1	19	244	60	0	214.7	0	0	19	10474	1	19	9775	9792	19	18	0	read	NM_005121.2	9606	9969	MED13	ARC250|DRIP250|HSPC221|THRAP1|TRAP240	mediator complex subunit 13	mediator of RNA polymerase II transcription subunit 13|activator-recruited cofactor 250 kDa component|mediator of RNA polymerase II transcription, subunit 13 homolog|thyroid hormone receptor-associated protein 1|thyroid hormone receptor-associated protein complex 240 kDa component|thyroid hormone receptor-associated protein complex component TRAP240|thyroid hormone receptor-associated protein, 24…	NM_005121.2	NP_005112.2	NC_000017.11	protein-coding	REVIEWED	17	-	61942604	62065982	Reference GRCh38.p12 Primary Assembly
hsa-mir-411_20g	NM_031407.6	1	608.8	608.8	1.83e-05	4.71e-05	3	5	8.36e-09	10.5	1	0	10	240	0	0	209.8	0	0	19	14747	9	18	1403	1412	10	10	0	read	NM_031407.6	9606	10075	HUWE1	ARF-BP1|HECTH9|HSPC272|Ib772|LASU1|MULE|URE-B1|UREB1	HECT, UBA and WWE domain containing 1, E3 ubiquitin protein ligase	E3 ubiquitin-protein ligase HUWE1|ARF-binding protein 1|BJ-HCC-24 tumor antigen|HECT domain protein LASU1|HECT-type E3 ubiquitin transferase HUWE1|Mcl-1 ubiquitin ligase E3|URE-binding protein 1|homologous to E6AP carboxyl terminus homologous protein 9|large structure of UREB1|upstream regulatory element-binding protein 1	NM_031407.6	NP_113584.3	NC_000023.11	protein-coding	REVIEWED	X	-	53532095	53686728	Reference GRCh38.p12 Primary Assembly
hsa-mir-411_20g	NM_001270439.1	1	565.9	565.9	4.51e-05	0.000188	1	3	0.0122	9.5	1	0	12	252	0	0	233.9	0	0	19	2094	8	19	1471	1482	12	12	0	read	NM_001270439.1	9606	10092	ARPC5	ARC16|dJ127C7.3|p16-Arc	actin related protein 2/3 complex subunit 5	actin-related protein 2/3 complex subunit 5|Arp2/3 protein complex subunit p16|actin related protein 2/3 complex, subunit 5, 16kDa|arp2/3 complex 16 kDa subunit	NM_001270439.1	NP_001257368.1	NC_000001.11	protein-coding	REVIEWED	1	-	183626192	183635940	Reference GRCh38.p12 Primary Assembly
hsa-mir-411_20g	NM_015322.4	1	542.2	542.2	8.2e-06	1.8e-05	1	2	0.00175	5.5	1	0	19	244	28	0	179.2	0	0	19	7132	1	19	2586	2604	19	19	0	read	NM_015322.4	9606	10116	FEM1B	F1A-ALPHA|F1AA|FEM1-beta	fem-1 homolog B	protein fem-1 homolog B|FEM-1-like death receptor binding protein|fem-1-like death receptor-binding protein alpha|fem-1-like in apoptotic pathway protein alpha	NM_015322.4	NP_056137.1	NC_000015.10	protein-coding	REVIEWED	15	+	68277802	68295864	Reference GRCh38.p12 Primary Assembly
hsa-mir-411_20g	NM_005780.2	1	632.2	632.2	5.27e-05	0.00103	1	1	6.54e-06	9	1	0	12	312	0	0	236.2	0	0	19	2180	8	19	1955	1966	12	12	0	read	NM_005780.2	9606	10186	LHFPL6	LHFP	LHFPL tetraspan subfamily member 6	LHFPL tetraspan subfamily member 6 protein|lipoma HMGIC fusion partner	NM_005780.2	NP_005771.1	NC_000013.11	protein-coding	REVIEWED	13	-	39342891	39603218	Reference GRCh38.p12 Primary Assembly
hsa-mir-411_20g	NM_005857.4	1	637.9	637.9	2.16e-05	0.000659	3	3	2.18e-14	11	1	0	9	240	0	0	238.9	0	0	19	3165	10	18	2793	2801	9	9	0	read	NM_005857.4	9606	10269	ZMPSTE24	FACE-1|FACE1|HGPS|PRO1|STE24|Ste24p	zinc metallopeptidase STE24	CAAX prenyl protease 1 homolog|farnesylated proteins-converting enzyme 1|prenyl protein-specific endoprotease 1|zinc metallopeptidase STE24 homolog|zinc metalloproteinase Ste24 homolog	NM_005857.4	NP_005848.2	NC_000001.11	protein-coding	REVIEWED	1	+	40258049	40294183	Reference GRCh38.p12 Primary Assembly
hsa-mir-411_20g	NM_005875.2	1	754.5	754.5	1.22e-05	0.000311	5	5	0	11	1	0	8	312	0	0	202.5	0	0	19	1014	12	19	263	270	8	8	0	read	NM_005875.2	9606	10289	EIF1B	GC20	eukaryotic translation initiation factor 1B	eukaryotic translation initiation factor 1b|protein translation factor SUI1 homolog GC20|translation factor sui1 homolog	NM_005875.2	NP_005866.1	NC_000003.12	protein-coding	VALIDATED	3	+	40309681	40312423	Reference GRCh38.p12 Primary Assembly
hsa-mir-411_20g	NM_001278554.1	1	704.6	704.6	1.24e-11	2.29e-10	4	5	7.11e-15	6.5	1	0	17	244	40	0	209.6	0	0	19	1557	3	19	547	563	17	17	0	read	NM_001278554.1	9606	10477	UBE2E3	UBCH9|UbcM2	ubiquitin conjugating enzyme E2 E3	ubiquitin-conjugating enzyme E2 E3|E2 ubiquitin-conjugating enzyme E3|ubiquitin carrier protein E3|ubiquitin conjugating enzyme E2E 3|ubiquitin-conjugating enzyme E2-23 kDa|ubiquitin-conjugating enzyme E2E 3 (UBC4/5 homolog, yeast)|ubiquitin-conjugating enzyme E2E 3 (homologous to yeast UBC4/5)|ubiquitin-protein ligase E3	NM_001278554.1	NP_001265483.1	NC_000002.12	protein-coding	REVIEWED	2	+	180980384	181063426	Reference GRCh38.p12 Primary Assembly
hsa-mir-411_20g	NM_001282425.1	1	594.7	594.7	0.00186	0.00537	2	4	1.82e-05	7.5	1	0	18	244	8	0	226.7	0	0	19	6016	2	19	2695	2712	18	18	0	read	NM_001282425.1	9606	10672	GNA13	G13	G protein subunit alpha 13	guanine nucleotide-binding protein subunit alpha-13|g alpha-13|guanine nucleotide binding protein (G protein), alpha 13	NM_001282425.1	NP_001269354.1	NC_000017.11	protein-coding	VALIDATED	17	-	65009288	65056801	Reference GRCh38.p12 Primary Assembly
hsa-mir-411_20g	NM_001319674.1	1	529.8	529.8	0.000688	0.00175	1	1	6.54e-06	8.5	1	0	15	240	0	0	207.8	0	0	19	2664	4	18	521	535	15	15	0	read	NM_001319674.1	9606	10691	GMEB1	P96PIF|PIF96	glucocorticoid modulatory element binding protein 1	glucocorticoid modulatory element-binding protein 1|DNA-binding protein p96PIF|PIF p96|parvovirus initiation factor p96	NM_001319674.1	NP_001306603.1	NC_000001.11	protein-coding	REVIEWED	1	+	28668727	28715602	Reference GRCh38.p12 Primary Assembly
hsa-mir-411_20g	NM_001113178.2	1	567.8	567.8	6e-07	2.89e-06	1	1	6.54e-06	9.5	1	0	13	244	0	0	248.8	0	0	19	13304	7	19	2236	2248	13	13	0	read	NM_001113178.2	9606	10725	NFAT5	NF-AT5|NFATL1|NFATZ|OREBP|TONEBP	nuclear factor of activated T cells 5	nuclear factor of activated T-cells 5|NFAT-like protein 1|T-cell transcription factor NFAT5|TonE-binding protein|glutamine rich protein H65|nuclear factor of activated T-cells 5, tonicity-responsive|osmotic response element-binding protein|tonicity-responsive enhancer-binding protein	NM_001113178.2	NP_001106649.1	NC_000016.10	protein-coding	REVIEWED	16	+	69565951	69704665	Reference GRCh38.p12 Primary Assembly
hsa-mir-411_20g	NM_001282601.1	1	628.6	628.6	4.41e-08	5.02e-07	2	2	3.54e-10	10.5	1	0	10	252	0	0	257.6	0	0	19	1982	10	19	1302	1311	10	10	0	read	NM_001282601.1	9606	10728	PTGES3	P23|TEBP|cPGES	prostaglandin E synthase 3	prostaglandin E synthase 3|Hsp90 co-chaperone|cytosolic prostaglandin E synthase|cytosolic prostaglandin E2 synthase|progesterone receptor complex p23|prostaglandin E synthase 3 (cytosolic)|telomerase-binding protein p23|unactive progesterone receptor, 23 kD	NM_001282601.1	NP_001269530.1	NC_000012.12	protein-coding	REVIEWED	12	-	56663340	56689574	Reference GRCh38.p12 Primary Assembly
hsa-mir-411_20g	NR_024565.1	1	517	517	0.000295	0.000569	1	1	6.54e-06	7	1	0	18	120	16	0	295	0	0	19	5151	2	19	4590	4607	18	18	0	read	NR_024565.1	9606	10778	ZNF271P	CT-ZFP48|HZF7|ZNF-EB|ZNF-dp|ZNF271|ZNFEB	zinc finger protein 271, pseudogene	C2H2 (Kruppel-type) zinc finger protein pseudogene|EBV-induced zinc finger protein|Zinc finger protein HZF7|Zinc finger protein ZNFphex133|Zinc finger protein dp|epstein-barr virus-induced zinc finger protein	NR_024565.1	-	NC_000018.10	pseudo	VALIDATED	18	+	35290271	35310765	Reference GRCh38.p12 Primary Assembly
hsa-mir-411_20g	NM_001080485.3	1	633.6	633.6	1.52e-05	0.000206	2	5	0.000165	9.5	1	0	13	240	0	0	276.6	0	0	19	6320	6	18	3012	3024	13	13	0	read	NM_001080485.3	9606	10838	ZNF275	-	zinc finger protein 275	zinc finger protein 275	NM_001080485.3	NP_001073954.3	NC_000023.11	protein-coding	VALIDATED	X	+	153334154	153352925	Reference GRCh38.p12 Primary Assembly
hsa-mir-411_20g	NM_001282621.1	1	710.7	710.7	5.72e-06	0.000129	4	6	2.09e-12	10	1	0	10	240	0	0	267.7	0	0	19	1772	9	18	602	611	10	10	0	read	NM_001282621.1	9606	10857	PGRMC1	Dap1|HPR6.6|IZA|MPR	progesterone receptor membrane component 1	membrane-associated progesterone receptor component 1|progesterone binding protein	NM_001282621.1	NP_001269550.1	NC_000023.11	protein-coding	REVIEWED	X	+	119236244	119244465	Reference GRCh38.p12 Primary Assembly
hsa-mir-411_20g	NM_006785.3	1	570.5	570.5	3.91e-05	0.000188	1	3	0.0122	6.5	1	0	19	244	28	0	218.5	0	0	19	5046	1	19	3189	3207	19	19	0	read	NM_006785.3	9606	10892	MALT1	IMD12|MLT|MLT1|PCASP1	MALT1 paracaspase	mucosa-associated lymphoid tissue lymphoma translocation protein 1|MALT1 protease|caspase-like protein|mucosa associated lymphoid tissue lymphoma translocation gene 1|paracaspase-1	NM_006785.4	NP_006776.1	NC_000018.10	protein-coding	REVIEWED	18	+	58671385	58753805	Reference GRCh38.p12 Primary Assembly
hsa-mir-411_20g	NM_006690.3	1	570.5	570.5	0.000351	0.00157	2	2	3.54e-10	11	1	0	9	240	0	0	211.5	0	0	19	4344	10	18	3719	3727	9	9	0	read	NM_006690.3	9606	10893	MMP24	MMP-24|MMP25|MT-MMP 5|MT-MMP5|MT5-MMP|MT5MMP|MTMMP5	matrix metallopeptidase 24	matrix metalloproteinase-24|matrix metallopeptidase 24 (membrane-inserted)|matrix metalloproteinase 24 (membrane-inserted)|membrane-type 5 matrix metalloproteinase|membrane-type matrix metalloproteinase 5	NM_006690.3	NP_006681.1	NC_000020.11	protein-coding	REVIEWED	20	+	35226735	35277000	Reference GRCh38.p12 Primary Assembly
hsa-mir-411_20g	NM_001297655.1	1	519.1	519.1	0.00502	0.00813	1	1	6.54e-06	11.5	1	0	8	244	0	0	197.1	0	0	19	2773	12	19	457	464	8	8	0	read	NM_001297655.1	9606	11004	KIF2C	CT139|KNSL6|MCAK	kinesin family member 2C	kinesin-like protein KIF2C|kinesin-like protein 6|mitotic centromere-associated kinesin|testis tissue sperm-binding protein Li 68n	NM_001297655.1	NP_001284584.1	NC_000001.11	protein-coding	REVIEWED	1	+	44739703	44767766	Reference GRCh38.p12 Primary Assembly
hsa-mir-411_20g	NM_001100603.1	1	591.2	591.2	3.74e-07	2.49e-06	1	3	0.0122	9.5	1	0	12	244	0	0	267.2	0	0	19	2621	8	19	974	985	12	12	0	read	NM_001100603.1	9606	11014	KDELR2	ELP-1|ERD2.2	KDEL endoplasmic reticulum protein retention receptor 2	ER lumen protein-retaining receptor 2|(Lys-Asp-Glu-Leu) endoplasmic reticulum protein retention receptor 2|ERD-2-like protein|ERD2-like protein 1|KDEL (Lys-Asp-Glu-Leu) endoplasmic reticulum protein retention receptor 2|KDEL receptor 2	NM_001100603.1	NP_001094073.1	NC_000007.14	protein-coding	REVIEWED	7	-	6461080	6484217	Reference GRCh38.p12 Primary Assembly
hsa-mir-411_20g	NM_001167606.1	1	573.9	573.9	2.39e-06	7.62e-06	1	1	6.54e-06	11.5	1	0	8	244	0	0	251.9	0	0	19	2835	12	19	1609	1616	8	8	0	read	NM_001167606.1	9606	11021	RAB35	H-ray|RAB1C|RAY	RAB35, member RAS oncogene family	ras-related protein Rab-35|GTP-binding protein RAY|ras-related protein rab-1c (GTP-binding protein ray)	NM_001167606.1	NP_001161078.1	NC_000012.12	protein-coding	VALIDATED	12	-	120095093	120117468	Reference GRCh38.p12 Primary Assembly
hsa-mir-411_20g	NM_001102426.2	1	653.3	653.3	1.58e-08	2.42e-07	2	5	0.000165	11	1	0	8	312	0	0	221.3	0	0	19	4226	12	19	4030	4037	8	8	0	read	NM_001102426.2	9606	11138	TBC1D8	AD3|GRAMD8|HBLP1|TBC1D8A|VRP	TBC1 domain family member 8	TBC1 domain family member 8|BUB2-like protein 1|TBC1 domain family, member 8 (with GRAM domain)|TBC1 domain family, member 8A|vascular Rab-GAP/TBC-containing protein	NM_001102426.2	NP_001095896.1	NC_000002.12	protein-coding	VALIDATED	2	-	101006434	101195320	Reference GRCh38.p12 Primary Assembly
hsa-mir-411_20g	NM_001349346.1	1	606.4	606.4	4.18e-06	1.56e-05	2	3	4.77e-07	8	1	0	15	244	0	0	241.4	0	0	19	2616	5	19	2055	2069	15	15	0	read	NM_001349346.1	9606	11212	PLPBP	EPVB6D|PROSC	pyridoxal phosphate binding protein	pyridoxal phosphate homeostasis protein|PLP homeostasis protein|proline synthase co-transcribed bacterial homolog protein|proline synthetase co-transcribed bacterial homolog protein	NM_001349346.1	NP_001336275.1	NC_000008.11	protein-coding	REVIEWED	8	+	37762545	37779767	Reference GRCh38.p12 Primary Assembly
hsa-mir-411_20g	NM_007359.4	1	587.5	587.5	0.00064	0.00272	2	2	3.54e-10	10	1	0	10	252	0	0	209.5	0	0	19	4198	10	19	4047	4056	10	10	0	read	NM_007359.4	9606	22794	CASC3	BTZ|MLN51	CASC3, exon junction complex subunit	protein CASC3|MLN 51|barentsz|cancer susceptibility 3|cancer susceptibility candidate 3|cancer susceptibility candidate gene 3 protein|metastatic lymph node 51|metastatic lymph node gene 51 protein|protein barentsz	NM_007359.4	NP_031385.2	NC_000017.11	protein-coding	REVIEWED	17	+	40140253	40172177	Reference GRCh38.p12 Primary Assembly
hsa-mir-411_20g	NM_012081.5	2	1010	513.8	0.000314	0.000462	1	1	6.54e-06	7.5	1	0	16	152	0	0	276.8	0	0	19	6063	3	18	5244	5259	16	16	0	read	NM_012081.5	9606	22936	ELL2	MRCCAT1	elongation factor for RNA polymerase II 2	RNA polymerase II elongation factor ELL2|ELL-related RNA polymerase II, elongation factor|elongation factor RNA for polymerase II 2|elongation factor, RNA polymerase II, 2|metastatic renal cell carcinoma-associated transcript 1	NM_012081.5	NP_036213.2	NC_000005.10	protein-coding	VALIDATED	5	-	95885097	95962070	Reference GRCh38.p12 Primary Assembly
hsa-mir-411_20g	NM_014976.1	1	513.7	513.7	0.00126	0.00234	1	1	6.54e-06	8.5	1	0	13	244	0	0	183.7	0	0	19	6416	7	19	3940	3952	13	13	0	read	NM_014976.1	9606	22984	PDCD11	ALG-4|ALG4|NFBP|RRP5	programmed cell death 11	protein RRP5 homolog|NF-kappa-B-binding protein|apoptosis-linked gene 4|programmed cell death protein 11	NM_014976.1	NP_055791.1	NC_000010.11	protein-coding	VALIDATED	10	+	103396614	103446294	Reference GRCh38.p12 Primary Assembly
hsa-mir-411_20g	NM_015060.2	1	517.4	517.4	0.000114	0.000251	1	1	6.54e-06	7.5	1	0	16	152	0	0	281.4	0	0	19	7065	3	18	3996	4011	16	16	0	read	NM_015060.2	9606	23080	AVL9	KIAA0241	AVL9 cell migration associated	late secretory pathway protein AVL9 homolog|AVL9 homolog (S. cerevisiase)	NM_015060.2	NP_055875.1	NC_000007.14	protein-coding	VALIDATED	7	+	32495425	32588740	Reference GRCh38.p12 Primary Assembly
hsa-mir-411_20g	NM_015113.3	1	517.3	517.3	0.00213	0.00338	1	1	6.54e-06	8	1	0	16	252	0	0	183.3	0	0	19	11412	4	19	4046	4061	16	16	0	read	NM_015113.3	9606	23140	ZZEF1	ZZZ4	zinc finger ZZ-type and EF-hand domain containing 1	zinc finger ZZ-type and EF-hand domain-containing protein 1|zinc finger, ZZ-type with EF hand domain 1	NM_015113.3	NP_055928.3	NC_000017.11	protein-coding	VALIDATED	17	-	4004444	4143019	Reference GRCh38.p12 Primary Assembly
hsa-mir-411_20g	NM_001134473.2	1	527.4	527.4	0.00439	0.00726	1	3	0.0122	10	1	0	10	312	0	0	132.4	0	0	19	7217	10	19	3062	3071	10	10	0	read	NM_001134473.2	9606	23199	GSE1	CRHSP24|KIAA0182	Gse1 coiled-coil protein	genetic suppressor element 1|CTC-786C10.1|Gse1 coiled-coil protein homolog	NM_001134473.2	NP_001127945.1	NC_000016.10	protein-coding	REVIEWED	16	+	85169511	85676205	Reference GRCh38.p12 Primary Assembly
hsa-mir-411_20g	NM_001136115.2	1	613.5	613.5	0.000204	0.00149	3	8	1.23e-05	7	1	1	17	152	44	0	262.5	0	0	19	5263	3	18	1682	1698	16	17	0	read	NM_001136115.2	9606	23219	FBXO28	CENP-30|Fbx28	F-box protein 28	F-box only protein 28|centromere protein 30	NM_001136115.2	NP_001129587.1	NC_000001.11	protein-coding	VALIDATED	1	+	224114086	224162046	Reference GRCh38.p12 Primary Assembly
hsa-mir-411_20g	NM_001297707.1	1	588.8	588.8	2.3e-07	2.89e-06	1	1	6.54e-06	6	1	0	18	240	24	0	230.8	0	0	19	7402	1	18	7244	7261	18	18	0	read	NM_001297707.1	9606	23271	CAMSAP2	CAMSAP1L1	calmodulin regulated spectrin associated protein family member 2	calmodulin-regulated spectrin-associated protein 2|calmodulin-regulated spectrin-associated protein 1-like protein 1	NM_001297707.1	NP_001284636.1	NC_000001.11	protein-coding	VALIDATED	1	+	200738904	200860706	Reference GRCh38.p12 Primary Assembly
hsa-mir-411_20g	NM_001142289.2	1	528.5	528.5	0.198	0.243	1	1	6.54e-06	6	1	0	18	312	8	0	116.5	0	0	19	3868	2	19	608	625	18	18	0	read	NM_001142289.2	9606	23295	MGRN1	RNF156	mahogunin ring finger 1	E3 ubiquitin-protein ligase MGRN1|RING finger protein 156|RING-type E3 ubiquitin transferase MGRN1|mahogunin RING finger protein 1|mahogunin ring finger 1, E3 ubiquitin protein ligase|probable E3 ubiquitin-protein ligase MGRN1	NM_001142289.2	NP_001135761.2	NC_000016.10	protein-coding	VALIDATED	16	+	4616492	4690973	Reference GRCh38.p12 Primary Assembly
hsa-mir-411_20g	NM_001290259.1	1	618.2	618.2	2.49e-11	2.57e-10	2	2	3.54e-10	9.5	1	0	11	248	0	0	245.2	0	0	19	8501	8	18	8282	8292	11	11	0	read	NM_001290259.1	9606	23469	PHF3	-	PHD finger protein 3	PHD finger protein 3	NM_001290259.1	NP_001277188.1	NC_000006.12	protein-coding	REVIEWED	6	+	63635801	63715521	Reference GRCh38.p12 Primary Assembly
hsa-mir-411_20g	NM_001318819.1	1	604.9	604.9	4.41e-06	1.56e-05	3	3	2.18e-14	9.5	1	0	11	240	0	0	199.9	0	0	19	6784	8	18	1834	1844	11	11	0	read	NM_001318819.1	9606	23506	BICRAL	GLTSCR1L|KIAA0240	BRD4 interacting chromatin remodeling complex associated protein like	BRD4-interacting chromatin-remodeling complex-associated protein-like|BRD4 interacting chromatin remodelling complex associated protein like|GLTSCR1 like|glioma tumor suppressor candidate region gene 1 protein-like	NM_001318819.1	NP_001305748.1	NC_000006.12	protein-coding	VALIDATED	6	+	42746957	42868559	Reference GRCh38.p12 Primary Assembly
hsa-mir-411_20g	NM_015352.1	1	512.4	512.4	0.000326	0.000468	1	1	6.54e-06	6	1	0	18	248	16	0	154.4	0	0	19	5249	1	18	1489	1506	18	18	0	read	NM_015352.1	9606	23509	POFUT1	DDD2|FUT12|O-FUT|O-Fuc-T|O-FucT-1|OFUCT1	protein O-fucosyltransferase 1	GDP-fucose protein O-fucosyltransferase 1|o-fucosyltransferase protein|peptide-O-fucosyltransferase 1	NM_015352.1	NP_056167.1	NC_000020.11	protein-coding	REVIEWED	20	+	32207888	32238663	Reference GRCh38.p12 Primary Assembly
hsa-mir-411_20g	NM_001105237.2	1	704	704	1.29e-11	2.29e-10	5	12	2.81e-09	5.5	1	1	17	312	12	0	138	0	0	19	3939	3	19	1104	1119	17	16	0	read	NM_001105237.2	9606	23603	CORO1C	HCRNN4	coronin 1C	coronin-1C|coronin, actin binding protein, 1C|coronin-3	NM_001105237.2	NP_001098707.1	NC_000012.12	protein-coding	REVIEWED	12	-	108645108	108759954	Reference GRCh38.p12 Primary Assembly
hsa-mir-411_20g	NM_177424.2	1	536.9	536.9	3.89e-06	9.72e-06	1	1	6.54e-06	9	1	0	12	240	0	0	211.9	0	0	19	3098	7	18	2106	2117	12	12	0	read	NM_177424.2	9606	23673	STX12	STX13|STX14	syntaxin 12	syntaxin-12	NM_177424.2	NP_803173.1	NC_000001.11	protein-coding	VALIDATED	1	+	27773182	27824451	Reference GRCh38.p12 Primary Assembly
hsa-mir-411_20g	NM_001330353.1	1	728.4	728.4	0.0056	0.0571	3	3	2.18e-14	6	1	1	17	312	28	0	221.4	0	0	19	1196	4	19	456	472	16	17	0	read	NM_001330353.1	9606	25972	UNC50	GMH1|HSD23|PDLs22|UNCL|URP	unc-50 inner nuclear membrane RNA binding protein	protein unc-50 homolog|geal-6 membrane-associated high-copy suppressor 1|periodontal ligament-specific protein 22|protein GMH1 homolog|unc-50 related|unc-50-like protein|uncoordinated-like protein	NM_001330353.1	NP_001317282.1	NC_000002.12	protein-coding	VALIDATED	2	+	98608547	98618514	Reference GRCh38.p12 Primary Assembly
hsa-mir-411_20g	NM_001251962.1	1	602.7	602.7	0.000464	0.00272	2	2	3.54e-10	7	1	0	18	244	16	0	221.7	0	0	19	5254	2	19	4276	4293	18	18	0	read	NM_001251962.1	9606	26084	ARHGEF26	CSGEF|HMFN1864|SGEF	Rho guanine nucleotide exchange factor 26	rho guanine nucleotide exchange factor 26|Rho guanine nucleotide exchange factor (GEF) 26|SH3 domain-containing guanine exchange factor|Src homology 3 domain-containing guanine nucleotide exchange factor|testicular tissue protein Li 171	NM_001251962.1	NP_001238891.1	NC_000003.12	protein-coding	REVIEWED	3	+	154121002	154257826	Reference GRCh38.p12 Primary Assembly
hsa-mir-411_20g	NM_001202438.1	2	1174.8	621.6	3.75e-06	2.86e-05	1	2	0.00175	9.5	1	0	11	312	0	0	226.6	0	0	19	4698	9	19	3191	3201	11	11	0	read	NM_001202438.1	9606	26098	EDRF1	C10orf137	erythroid differentiation regulatory factor 1	erythroid differentiation-related factor 1	NM_001202438.1	NP_001189367.1	NC_000010.11	protein-coding	REVIEWED	10	+	125719514	125764142	Reference GRCh38.p12 Primary Assembly
hsa-mir-411_20g	NM_001330326.1	1	601.7	601.7	0.000119	0.00103	3	3	2.18e-14	9	1	0	14	152	0	0	292.7	0	0	19	7718	5	18	6121	6134	14	14	0	read	NM_001330326.1	9606	26108	PYGO1	-	pygopus family PHD finger 1	pygopus homolog 1|pygopus-like protein 1	NM_001330326.1	NP_001317255.1	NC_000015.10	protein-coding	VALIDATED	15	-	55538880	55588851	Reference GRCh38.p12 Primary Assembly
hsa-mir-411_20g	NM_001039937.1	1	540.3	540.3	0.00136	0.00325	1	1	6.54e-06	6	1	1	18	244	20	0	194.3	0	0	19	6973	3	19	2094	2111	17	18	0	read	NM_001039937.1	9606	26512	INTS6	DBI-1|DDX26|DDX26A|DICE1|HDB|INT6|Notchl2	integrator complex subunit 6	integrator complex subunit 6|DEAD box protein|DEAD/H (Asp-Glu-Ala-Asp/His) box polypeptide 26|RNA helicase HDB|protein deleted in cancer 1	NM_001039937.1	NP_001035026.1	NC_000013.11	protein-coding	REVIEWED	13	-	51353170	51453332	Reference GRCh38.p12 Primary Assembly
hsa-mir-411_20g	NM_001317122.1	1	911.3	911.3	8.63e-09	1.21e-07	10	55	3.64e-06	5.5	1	0	19	244	12	0	206.3	0	0	19	7510	1	19	2248	2266	19	19	0	read	NM_001317122.1	9606	26523	AGO1	EIF2C|EIF2C1|GERP95|Q99|hAgo1	argonaute 1, RISC catalytic component	protein argonaute-1|Golgi Endoplasmic Reticulum protein 95 kDa|argonaute RISC catalytic component 1|argonaute1|eIF-2C 1|eIF2C 1|eukaryotic translation initiation factor 2C, 1|putative RNA-binding protein Q99	NM_001317122.1	NP_001304051.1	NC_000001.11	protein-coding	REVIEWED	1	+	35869807	35929609	Reference GRCh38.p12 Primary Assembly
hsa-mir-411_20g	NM_001136138.3	1	567.9	567.9	8.31e-05	0.000165	1	1	6.54e-06	9	1	0	13	240	0	0	245.9	0	0	19	5477	6	18	2598	2610	13	13	0	read	NM_001136138.3	9606	26750	RPS6KC1	RPK118|RSKL1|S6K-delta-1|S6PKh1|humS6PKh1	ribosomal protein S6 kinase C1	ribosomal protein S6 kinase delta-1|52 kDa ribosomal protein S6 kinase|SPHK1-binding protein|ribosomal S6 kinase-like protein with two PSK domains 118 kDa protein|ribosomal protein S6 kinase, 52kDa, polypeptide 1	NM_001136138.3	NP_001129610.1	NC_000001.11	protein-coding	REVIEWED	1	+	213051232	213378752	Reference GRCh38.p12 Primary Assembly
hsa-mir-411_20g	NM_001278241.1	1	600.1	600.1	1.53e-05	0.000188	1	1	6.54e-06	11	1	0	8	312	0	0	208.1	0	0	19	3539	12	19	2604	2611	8	8	0	read	NM_001278241.1	9606	27043	PELP1	MNAR|P160	proline, glutamate and leucine rich protein 1	proline-, glutamic acid- and leucine-rich protein 1|modulator of non-genomic activity of estrogen receptor|proline and glutamic acid rich nuclear protein|transcription factor HMX3	NM_001278241.1	NP_001265170.1	NC_000017.11	protein-coding	REVIEWED	17	-	4671383	4704336	Reference GRCh38.p12 Primary Assembly
hsa-mir-411_20g	NM_014415.3	1	583.7	583.7	8.99e-06	6.12e-05	1	1	6.54e-06	11	1	0	9	252	0	0	254.7	0	0	19	5132	11	19	4462	4470	9	9	0	read	NM_014415.3	9606	27107	ZBTB11	ZNF-U69274|ZNF913	zinc finger and BTB domain containing 11	zinc finger and BTB domain-containing protein 11	NM_014415.3	NP_055230.2	NC_000003.12	protein-coding	VALIDATED	3	-	101649438	101677143	Reference GRCh38.p12 Primary Assembly
hsa-mir-411_20g	NM_001126103.2	1	597.2	597.2	5.79e-06	1.77e-05	1	1	6.54e-06	11	1	0	8	312	0	0	205.2	0	0	19	3372	12	19	1053	1060	8	8	0	read	NM_001126103.2	9606	29127	RACGAP1	CYK4|HsCYK-4|ID-GAP|MgcRacGAP	Rac GTPase activating protein 1	rac GTPase-activating protein 1|male germ cell RacGap|protein CYK4 homolog	NM_001126103.2	NP_001119575.1	NC_000012.12	protein-coding	REVIEWED	12	-	49989161	50033205	Reference GRCh38.p12 Primary Assembly
hsa-mir-411_20g	NM_016010.2	1	699	699	0.000124	0.00184	1	1	6.54e-06	6	1	0	19	312	8	0	294	0	0	19	3352	1	19	3262	3280	19	19	0	read	NM_016010.2	9606	51101	ZC2HC1A	C8orf70|CGI-62|FAM164A	zinc finger C2HC-type containing 1A	zinc finger C2HC domain-containing protein 1A|family with sequence similarity 164, member A|protein FAM164A	NM_016010.2	NP_057094.2	NC_000008.11	protein-coding	VALIDATED	8	+	78666046	78719764	Reference GRCh38.p12 Primary Assembly
hsa-mir-411_20g	NM_001317980.1	1	520.7	520.7	0.000104	0.000251	1	2	0.00175	10	1	0	12	152	0	0	295.7	0	0	19	789	7	18	756	767	12	12	0	read	NM_001317980.1	9606	51121	RPL26L1	RPL26P1	ribosomal protein L26 like 1	60S ribosomal protein L26-like 1|large ribosomal subunit protein uL24-like 1|ribosomal protein L26 homolog|ribosomal protein L26 pseudogene 1	NM_001317980.1	NP_001304909.1	NC_000005.10	protein-coding	REVIEWED	5	+	172953676	172969770	Reference GRCh38.p12 Primary Assembly
hsa-mir-411_20g	NM_016120.3	1	604.7	604.7	0.000401	0.00248	1	1	6.54e-06	7.5	1	0	16	240	0	0	278.7	0	0	19	10590	3	18	2162	2177	16	16	0	read	NM_016120.3	9606	51132	RLIM	MRX61|NY-REN-43|RNF12	ring finger protein, LIM domain interacting	E3 ubiquitin-protein ligase RLIM|E3 ubiquitin-protein ligase RNF12|LIM domain-interacting RING finger protein|R-LIM|RING finger LIM domain-binding protein|RING-type E3 ubiquitin transferase RLIM|renal carcinoma antigen NY-REN-43|ring finger protein 12|ring zinc finger LIM domain binding protein|ring zinc finger protein NY-REN-43antigen	NM_016120.3	NP_057204.2	NC_000023.11	protein-coding	REVIEWED	X	-	74582975	74614625	Reference GRCh38.p12 Primary Assembly
hsa-mir-411_20g	NM_016299.3	1	517.8	517.8	0.000367	0.000807	1	1	6.54e-06	9	1	0	14	152	0	0	286.8	0	0	19	1921	5	18	1150	1163	14	14	0	read	NM_016299.3	9606	51182	HSPA14	HSP70-4|HSP70L1	heat shock protein family A (Hsp70) member 14	heat shock 70 kDa protein 14|HSP70-like protein 1|heat shock 70kDa protein 14 isoform 1 variant 3|heat shock protein HSP60|heat shock protein hsp70-related protein	NM_016299.3	NP_057383.2	NC_000010.11	protein-coding	VALIDATED	10	+	14838159	14871740	Reference GRCh38.p12 Primary Assembly
hsa-mir-411_20g	NM_001142464.2	1	532.9	532.9	0	0	1	1	6.54e-06	7	1	0	18	312	24	0	109.9	0	0	19	1561	2	19	578	595	18	18	0	read	NM_001142464.2	9606	51295	ECSIT	SITPEC	ECSIT signalling integrator	evolutionarily conserved signaling intermediate in Toll pathway, mitochondrial|ECSIT homolog|likely ortholog of mouse signaling intermediate in Toll pathway evolutionarily conserved	NM_001142464.2	NP_001135936.1	NC_000019.10	protein-coding	VALIDATED	19	-	11505915	11529171	Reference GRCh38.p12 Primary Assembly
hsa-mir-411_20g	NM_016622.3	1	590.6	590.6	1.39e-05	9.77e-05	2	2	3.54e-10	7.5	1	0	15	244	0	0	216.6	0	0	19	3323	5	19	174	188	15	15	0	read	NM_016622.3	9606	51318	MRPL35	L35mt|MRP-L35	mitochondrial ribosomal protein L35	39S ribosomal protein L35, mitochondrial|mitochondrial large ribosomal subunit protein bL35m	NM_016622.3	NP_057706.2	NC_000002.12	protein-coding	REVIEWED	2	+	86199432	86213797	Reference GRCh38.p12 Primary Assembly
hsa-mir-411_20g	NM_001079520.1	1	622.1	622.1	3.17e-05	0.000354	2	2	3.54e-10	6	1	1	17	240	84	0	172.1	0	0	19	3766	3	18	855	871	16	17	0	read	NM_001079520.1	9606	51339	DACT1	DAPPER|DAPPER1|DPR1|FRODO|HDPR1|TBS2|THYEX3	dishevelled binding antagonist of beta catenin 1	dapper homolog 1|dapper antagonist of catenin 1|dapper, antagonist of beta-catenin, homolog 1|hepatocellular carcinoma novel gene 3 protein|heptacellular carcinoma novel gene 3	NM_001079520.1	NP_001072988.1	NC_000014.9	protein-coding	REVIEWED	14	+	58634067	58648320	Reference GRCh38.p12 Primary Assembly
hsa-mir-411_20g	NM_016145.3	1	3332.3	3332.3	0	0	69	69	0	11	1	0	8	312	0	0	220.3	0	0	19	861	12	19	251	258	8	8	0	read	NM_016145.3	9606	51398	WDR83OS	C19orf56|PTD008	WD repeat domain 83 opposite strand	protein Asterix|UPF0139 membrane protein C19orf56|WDR83 opposite strand	NM_016145.3	NP_057229.1	NC_000019.10	protein-coding	VALIDATED	19	-	12668066	12671022	Reference GRCh38.p12 Primary Assembly
hsa-mir-411_20g	NM_016255.2	1	1056.6	1056.6	0	0	12	13	0	6	1	0	18	312	16	0	198.6	0	0	19	4762	2	19	1211	1228	18	18	0	read	NM_016255.2	9606	51439	FAM8A1	AHCP	family with sequence similarity 8 member A1	protein FAM8A1|Autosomal Highly Conserved Protein	NM_016255.2	NP_057339.1	NC_000006.12	protein-coding	VALIDATED	6	+	17600286	17611718	Reference GRCh38.p12 Primary Assembly
hsa-mir-411_20g	NM_001257999.2	1	633.6	633.6	1.55e-06	7.9e-06	4	4	0	10	1	0	12	244	0	0	193.6	0	0	19	7727	8	19	536	547	12	12	0	read	NM_001257999.2	9606	51479	ANKFY1	ANKHZN|BTBD23|ZFYVE14	ankyrin repeat and FYVE domain containing 1	rabankyrin-5|Rabankyrin-5|ankyrin repeat and FYVE domain-containing protein 1|ankyrin repeat hooked to zinc finger motif|ankyrin repeats hooked to a zinc finger motif|rank-5	NM_001257999.2	NP_001244928.1	NC_000017.11	protein-coding	REVIEWED	17	-	4163817	4263994	Reference GRCh38.p12 Primary Assembly
hsa-mir-411_20g	NM_016395.2	1	580.1	580.1	6.15e-07	3.28e-06	1	1	6.54e-06	9	1	0	13	252	0	0	249.1	0	0	19	3213	7	19	1224	1236	13	13	0	read	NM_016395.2	9606	51495	HACD3	B-IND1|BIND1|HSPC121|PTPLAD1	3-hydroxyacyl-CoA dehydratase 3	very-long-chain (3R)-3-hydroxyacyl-CoA dehydratase 3|butyrate-induced protein 1|butyrate-induced transcript 1|protein tyrosine phosphatase-like A domain containing 1|protein tyrosine phosphatase-like protein PTPLAD1|protein-tyrosine phosphatase-like A domain-containing protein 1|very-long-chain (3R)-3-hydroxyacyl-[acyl-carrier protein] dehydratase 3	NM_016395.2	NP_057479.2	NC_000015.10	protein-coding	VALIDATED	15	+	65530488	65578354	Reference GRCh38.p12 Primary Assembly
hsa-mir-411_20g	NM_001286229.1	2	1268.7	669.4	0.000315	0.00337	2	2	3.54e-10	8.5	1	0	12	320	0	0	220.4	0	0	19	4381	8	19	2328	2339	12	12	0	read	NM_001286229.1	9606	51514	DTL	CDT2|DCAF2|L2DTL|RAMP	denticleless E3 ubiquitin protein ligase homolog	denticleless protein homolog|DDB1- and CUL4-associated factor 2|RA-regulated nuclear matrix-associated protein|lethal(2) denticleless protein homolog|retinoic acid-regulated nuclear matrix-associated protein	NM_001286229.1	NP_001273158.1	NC_000001.11	protein-coding	VALIDATED	1	+	212035552	212105005	Reference GRCh38.p12 Primary Assembly
hsa-mir-411_20g	NM_001165258.1	1	658.4	658.4	0	0	3	7	2.16e-06	8	1	0	15	244	0	0	251.4	0	0	19	1201	5	19	767	781	15	15	0	read	NM_001165258.1	9606	51522	TMEM14C	C6orf53|HSPC194|MSTP073|NET26|bA421M1.6	transmembrane protein 14C	transmembrane protein 14C	NM_001165258.1	NP_001158730.1	NC_000006.12	protein-coding	VALIDATED	6	+	10722914	10731128	Reference GRCh38.p12 Primary Assembly
hsa-mir-411_20g	NM_001146265.1	1	584.7	584.7	0.00025	0.00148	1	1	6.54e-06	7.5	1	0	18	244	8	0	253.7	0	0	19	4951	2	19	2216	2233	18	18	0	read	NM_001146265.1	9606	54329	GPR85	SREB|SREB2	G protein-coupled receptor 85	probable G-protein coupled receptor 85|seven transmembrane helix receptor|super conserved receptor expressed in brain 2	NM_001146265.1	NP_001139737.1	NC_000007.14	protein-coding	VALIDATED	7	-	113080412	113087777	Reference GRCh38.p12 Primary Assembly
hsa-mir-411_20g	NM_001102653.1	1	873.4	873.4	5.6e-14	2.24e-12	9	11	0	6.5	1	0	18	248	4	0	214.4	0	0	19	7068	1	18	6376	6393	18	18	0	read	NM_001102653.1	9606	54726	OTUD4	DUBA6|HIN1|HSHIN1	OTU deubiquitinase 4	OTU domain-containing protein 4|HIV-1 induced protein HIN-1	NM_001102653.1	NP_001096123.1	NC_000004.12	protein-coding	REVIEWED	4	-	145133649	145180018	Reference GRCh38.p12 Primary Assembly
hsa-mir-411_20g	NM_001321783.1	1	610.9	610.9	3.72e-08	3.72e-07	3	3	2.18e-14	6.5	1	0	15	248	0	0	184.9	0	0	19	8699	4	18	804	818	15	15	0	read	NM_001321783.1	9606	54906	FAM208B	C10orf18|bA318E3.2	family with sequence similarity 208 member B	protein FAM208B	NM_001321783.1	NP_001308712.1	NC_000010.11	protein-coding	VALIDATED	10	+	5684758	5765778	Reference GRCh38.p12 Primary Assembly
hsa-mir-411_20g	NM_001104595.2	1	666.4	666.4	2.68e-05	0.000328	2	2	3.54e-10	4	1	1	20	252	20	0	262.4	0	0	19	3480	1	19	2689	2708	19	20	0	read	NM_001104595.2	9606	55007	FAM118A	C22orf8	family with sequence similarity 118 member A	protein FAM118A|bK268H5.C22.4	NM_001104595.2	NP_001098065.1	NC_000022.11	protein-coding	VALIDATED	22	+	45308959	45341954	Reference GRCh38.p12 Primary Assembly
hsa-mir-411_20g	NM_017966.4	1	587.8	587.8	0.000508	0.00325	1	1	6.54e-06	5.5	1	0	19	312	8	0	175.8	0	0	19	2711	1	19	2403	2421	19	19	0	read	NM_017966.4	9606	55048	VPS37C	-	VPS37C, ESCRT-I subunit	vacuolar protein sorting-associated protein 37C|ESCRT-I complex subunit VPS37C|hVps37C|vacuolar protein sorting 37 homolog C|vacuolar protein sorting 37C	NM_017966.4	NP_060436.4	NC_000011.10	protein-coding	VALIDATED	11	-	61130255	61161443	Reference GRCh38.p12 Primary Assembly
hsa-mir-411_20g	NM_018011.3	1	623.1	623.1	8.54e-08	9.33e-07	3	11	0.00035	8.5	1	0	15	244	0	0	221.1	0	0	19	1772	5	19	1235	1249	15	15	0	read	NM_018011.3	9606	55082	ARGLU1	-	arginine and glutamate rich 1	arginine and glutamate-rich protein 1	NM_018011.3	NP_060481.3	NC_000013.11	protein-coding	VALIDATED	13	-	106543313	106568165	Reference GRCh38.p12 Primary Assembly
hsa-mir-411_20g	NM_001345998.1	1	547.8	547.8	0.000968	0.0029	1	1	6.54e-06	9	1	0	12	252	0	0	213.8	0	0	19	2169	8	19	1206	1217	12	12	0	read	NM_001345998.1	9606	55100	WDR70	-	WD repeat domain 70	WD repeat-containing protein 70	NM_001345998.1	NP_001332927.1	NC_000005.10	protein-coding	VALIDATED	5	+	37379259	37752671	Reference GRCh38.p12 Primary Assembly
hsa-mir-411_20g	NM_018046.4	1	566.2	566.2	0	0	2	2	3.54e-10	8.5	1	0	15	252	0	0	194.2	0	0	19	4514	5	19	4273	4287	15	15	0	read	NM_018046.4	9606	55109	AGGF1	GPATC7|GPATCH7|HSU84971|HUS84971|VG5Q	angiogenic factor with G-patch and FHA domains 1	angiogenic factor with G patch and FHA domains 1|G patch domain-containing protein 7|angiogenic factor VG5Q|vasculogenesis gene on 5q protein	NM_018046.4	NP_060516.2	NC_000005.10	protein-coding	REVIEWED	5	+	77030384	77065233	Reference GRCh38.p12 Primary Assembly
hsa-mir-411_20g	NM_001319677.1	1	1362.8	1362.8	0	0	21	22	0	11	1	0	8	312	0	0	170.8	0	0	19	2106	12	19	698	705	8	8	0	read	NM_001319677.1	9606	55116	TMEM39B	-	transmembrane protein 39B	transmembrane protein 39B	NM_001319677.1	NP_001306606.1	NC_000001.11	protein-coding	VALIDATED	1	+	32072030	32102865	Reference GRCh38.p12 Primary Assembly
hsa-mir-411_20g	NM_001134479.1	1	351.1	351.1	0.00225	0.00234	4	6	2.09e-12	6	1	0	15	84	-10	0	56.1	0	0	19	3795	2	16	1343	1357	15	15	11	read	NM_001134479.1	9606	55144	LRRC8D	LRRC5	leucine rich repeat containing 8 VRAC subunit D	volume-regulated anion channel subunit LRRC8D|leucine rich repeat containing 5|leucine rich repeat containing 8 family member D|leucine-rich repeat-containing protein 5|leucine-rich repeat-containing protein 8D	NM_001134479.1	NP_001127951.1	NC_000001.11	protein-coding	VALIDATED	1	+	89821013	89936431	Reference GRCh38.p12 Primary Assembly
hsa-mir-411_20g	NM_018169.3	2	1197.8	665.5	0	0	2	2	3.54e-10	11	1	0	8	312	0	0	233.5	0	0	19	6246	12	19	4409	4416	8	8	0	read	NM_018169.3	9606	55196	KIAA1551	C12orf35|GET|UTA2-1	KIAA1551	uncharacterized protein KIAA1551|gonad expressed transcript|uncharacterized protein C12orf35	NM_018169.3	NP_060639.3	NC_000012.12	protein-coding	VALIDATED	12	+	31959418	31993106	Reference GRCh38.p12 Primary Assembly
hsa-mir-411_20g	NM_001251904.1	1	592.2	592.2	0.167	0.243	1	1	6.54e-06	6.5	1	0	19	244	4	0	264.2	0	0	19	3307	1	19	463	481	19	19	0	read	NM_001251904.1	9606	55198	APPL2	DIP13B	adaptor protein, phosphotyrosine interacting with PH domain and leucine zipper 2	DCC-interacting protein 13-beta|DIP13 beta|adapter protein containing PH domain, PTB domain and leucine zipper motif 2|adaptor protein, phosphotyrosine interaction, PH domain and leucine zipper containing 2	NM_001251904.1	NP_001238833.1	NC_000012.12	protein-coding	REVIEWED	12	-	105173296	105236229	Reference GRCh38.p12 Primary Assembly
hsa-mir-411_20g	NM_018292.4	1	562.8	562.8	3.41e-05	0.000159	1	1	6.54e-06	7.5	1	0	18	244	8	0	229.8	0	0	19	4118	2	19	1171	1188	18	18	0	read	NM_018292.4	9606	55278	QRSL1	GatA	glutaminyl-tRNA synthase (glutamine-hydrolyzing)-like 1	glutamyl-tRNA(Gln) amidotransferase subunit A, mitochondrial|glu-AdT subunit A|glutaminyl-tRNA synthase-like protein 1|glutamyl-tRNA(Gln) amidotransferase subunit A homolog|glutamyl-tRNA(Gln) amidotransferase, subunit A	NM_018292.4	NP_060762.3	NC_000006.12	protein-coding	VALIDATED	6	+	106629565	106668416	Reference GRCh38.p12 Primary Assembly
hsa-mir-411_20g	NM_018638.4	1	729.1	729.1	3.63e-08	1.52e-06	4	4	0	6.5	1	0	18	244	16	0	264.1	0	0	19	7101	2	19	1272	1289	18	18	0	read	NM_018638.4	9606	55500	ETNK1	EKI|EKI 1|EKI1|Nbla10396	ethanolamine kinase 1	ethanolamine kinase 1|putative protein product of Nbla10396	NM_018638.4	NP_061108.2	NC_000012.12	protein-coding	REVIEWED	12	+	22625141	22690673	Reference GRCh38.p12 Primary Assembly
hsa-mir-411_20g	NM_018708.2	1	579.2	579.2	1.93e-06	7.62e-06	2	2	3.54e-10	5.5	1	1	18	244	24	0	196.2	0	0	19	3844	2	19	3333	3349	18	17	0	read	NM_018708.2	9606	55527	FEM1A	EPRAP	fem-1 homolog A	protein fem-1 homolog A|FEM1-alpha|prostaglandin E receptor 4-associated protein	NM_018708.2	NP_061178.1	NC_000019.10	protein-coding	VALIDATED	19	+	4791715	4795558	Reference GRCh38.p12 Primary Assembly
hsa-mir-411_20g	NM_001330425.1	1	554.1	554.1	0.000106	0.000367	2	6	0.000725	11	1	0	9	252	0	0	185.1	0	0	19	1716	11	19	885	893	9	9	0	read	NM_001330425.1	9606	55577	NAGK	GNK|HSA242910	N-acetylglucosamine kinase	N-acetyl-D-glucosamine kinase|glcNAc kinase	NM_001330425.1	NP_001317354.1	NC_000002.12	protein-coding	REVIEWED	2	+	71068277	71078867	Reference GRCh38.p12 Primary Assembly
hsa-mir-411_20g	NM_001173977.1	1	661	661	0.000374	0.00337	3	3	2.18e-14	6.5	1	0	18	244	4	0	245	0	0	19	5413	2	19	1048	1065	18	18	0	read	NM_001173977.1	9606	55604	CARMIL1	CARMIL|CARMIL1a|LRRC16|LRRC16A|dJ501N12.1|dJ501N12.5	capping protein regulator and myosin 1 linker 1	F-actin-uncapping protein LRRC16A|CARMIL homolog|capping protein regulator and myosin 1 linker protein 1|capping protein, Arp2/3 and myosin-I linker homolog 1|capping protein, Arp2/3 and myosin-I linker protein 1|capping protein, Arp2/3, and Myosin-I Linker homolog 1|leucine rich repeat containing 16|leucine rich repeat containing 16A|leucine-rich repeat-containing protein 16A|testicular tissue p…	NM_001173977.1	NP_001167448.1	NC_000006.12	protein-coding	VALIDATED	6	+	25279427	25620529	Reference GRCh38.p12 Primary Assembly
hsa-mir-411_20g	NM_001257998.1	1	-50.9	-50.9	0.758	0.758	2	2	3.54e-10	6.5	1	0	16	-220	-10	0	42.1	0	0	19	5741	1	16	2319	2334	16	16	11	read	NM_001257998.1	9606	55610	VPS50	CCDC132|VPS54L	VPS50, EARP/GARPII complex subunit	syndetin|EARP/GARPII complex subunit VPS50|coiled-coil domain containing 132|coiled-coil domain-containing protein 132	NM_001257998.1	NP_001244927.1	NC_000007.14	protein-coding	VALIDATED	7	+	93232339	93361122	Reference GRCh38.p12 Primary Assembly
hsa-mir-411_20g	NM_017908.3	1	803.1	803.1	1.82e-12	1.62e-10	8	15	0	10	1	0	12	152	0	0	298.1	0	0	19	2268	7	18	2218	2229	12	12	0	read	NM_017908.3	9606	55663	ZNF446	ZKSCAN20|ZSCAN30|ZSCAN52	zinc finger protein 446	zinc finger protein 446|zinc finger protein with KRAB and SCAN domains 20	NM_017908.3	NP_060378.1	NC_000019.10	protein-coding	VALIDATED	19	+	58476025	58489532	Reference GRCh38.p12 Primary Assembly
hsa-mir-411_20g	NM_001168347.2	1	550.8	550.8	7.13e-05	0.000195	1	3	0.0122	6.5	1	0	15	320	0	0	134.8	0	0	19	2372	5	19	965	979	15	15	0	read	NM_001168347.2	9606	55695	NSUN5	NOL1|NOL1R|NSUN5A|WBSCR20|WBSCR20A|p120|p120(NOL1)	NOP2/Sun RNA methyltransferase family member 5	probable 28S rRNA (cytosine-C(5))-methyltransferase|NOL1-related protein|NOL1/NOP2/Sun domain family member 5|NOP2/Sun domain family, member 5|NOP2/Sun domain family, member 5A|Williams Beuren syndrome chromosome region 20A|Williams-Beuren syndrome chromosomal region 20A protein|Williams-Beuren syndrome critical region protein 20 copy A|putative methyltransferase NSUN5	NM_001168347.2	NP_001161819.1	NC_000007.14	protein-coding	REVIEWED	7	-	73302515	73308866	Reference GRCh38.p12 Primary Assembly
hsa-mir-411_20g	NM_001008493.2	1	610.9	610.9	3.71e-08	3.72e-07	2	4	1.82e-05	6.5	1	0	15	244	0	0	232.9	0	0	19	13190	5	19	4866	4880	15	15	0	read	NM_001008493.2	9606	55740	ENAH	ENA|MENA|NDPP1	ENAH, actin regulator	protein enabled homolog|enabled homolog|mammalian enabled variant 11a|mammalian enabled variant pan	NM_001008493.2	NP_001008493.1	NC_000001.11	protein-coding	REVIEWED	1	-	225486828	225660045	Reference GRCh38.p12 Primary Assembly
hsa-mir-411_20g	NM_018229.3	1	823.8	823.8	2.14e-07	1.79e-06	8	9	0	3.5	1	1	19	252	28	0	172.8	0	0	19	3110	1	19	743	760	19	18	0	read	NM_018229.3	9606	55745	AP5M1	C14orf108|MUDENG|Mu5|MuD	adaptor related protein complex 5 subunit mu 1	AP-5 complex subunit mu-1|AP-5 complex subunit mu|MHD domain-containing death-inducing protein|MU-2/AP1M2 domain containing, death-inducing|Mu-2 related death-inducing|adapter-related protein complex 5 mu subunit|adapter-related protein complex 5 subunit mu-1|adaptor related protein complex 5 mu 1 subunit|mu-2-related death-inducing protein|putative HIV-1 infection-related protein	NM_018229.3	NP_060699.3	NC_000014.9	protein-coding	VALIDATED	14	+	57268887	57298741	Reference GRCh38.p12 Primary Assembly
hsa-mir-411_20g	NM_018328.4	1	616.5	616.5	1.44e-05	4.71e-05	2	2	3.54e-10	7.5	1	0	18	240	8	0	250.5	0	0	19	6032	1	18	2139	2156	18	18	0	read	NM_018328.4	9606	55777	MBD5	MRD1	methyl-CpG binding domain protein 5	methyl-CpG-binding domain protein 5|methyl-CpG-binding protein MBD5	NM_018328.4	NP_060798.2	NC_000002.12	protein-coding	REVIEWED	2	+	148021010	148516922	Reference GRCh38.p12 Primary Assembly
hsa-mir-411_20g	NM_018682.3	1	764.4	764.4	6.49e-05	0.00169	4	4	0	11	1	0	8	312	0	0	252.4	0	0	19	6725	12	19	2947	2954	8	8	0	read	NM_018682.3	9606	55904	KMT2E	HDCMC04P|MLL5|NKp44L	lysine methyltransferase 2E	inactive histone-lysine N-methyltransferase 2E|histone-lysine N-methyltransferase 2E|histone-lysine N-methyltransferase MLL5|inactive lysine N-methyltransferase 2E|lysine (K)-specific methyltransferase 2E|myeloid/lymphoid or mixed-lineage leukemia 5 (trithorax homolog, Drosophila)|myeloid/lymphoid or mixed-lineage leukemia protein 5	NM_018682.3	NP_061152.3	NC_000007.14	protein-coding	REVIEWED	7	+	104940948	105114084	Reference GRCh38.p12 Primary Assembly
hsa-mir-411_20g	NM_018697.3	1	558.7	558.7	9.81e-09	5.17e-08	1	1	6.54e-06	8	1	0	18	240	0	0	241.7	0	0	19	4353	1	18	2250	2267	18	18	0	read	NM_018697.3	9606	55915	LANCL2	GPR69B|TASP	LanC like 2	lanC-like protein 2|G protein-coupled receptor 69B|LanC (bacterial lantibiotic synthetase component C)-like 2|LanC lantibiotic synthetase component C-like 2|testis-specific adriamycin sensitivity protein	NM_018697.3	NP_061167.1	NC_000007.14	protein-coding	VALIDATED	7	+	55365447	55433741	Reference GRCh38.p12 Primary Assembly
hsa-mir-411_20g	NM_001242617.1	1	775.2	775.2	7.9e-09	1.11e-07	5	7	3.33e-16	7	1	0	14	244	0	0	281.2	0	0	19	2623	6	19	810	823	14	14	0	read	NM_001242617.1	9606	55916	NXT2	P15-2	nuclear transport factor 2 like export factor 2	NTF2-related export protein 2|protein p15-2	NM_001242617.1	NP_001229546.1	NC_000023.11	protein-coding	REVIEWED	X	+	109535780	109544697	Reference GRCh38.p12 Primary Assembly
hsa-mir-411_20g	NM_019613.3	1	804.8	804.8	2.59e-05	0.00101	7	8	0	10.5	1	0	10	252	0	0	233.8	0	0	19	2596	10	19	309	318	10	10	0	read	NM_019613.3	9606	56270	WDR45B	NEDSBAS|WDR45L|WIPI-3|WIPI3	WD repeat domain 45B	WD repeat domain phosphoinositide-interacting protein 3|WD repeat protein 45-like|WD repeat-containing protein 45-like|WD repeat-containing protein 45B|WDR45-like protein|WIPI3 long|WIPI49-like protein	NM_019613.3	NP_062559.2	NC_000017.11	protein-coding	REVIEWED	17	-	82614561	82648534	Reference GRCh38.p12 Primary Assembly
hsa-mir-411_20g	NM_001040181.1	1	1104.2	1104.2	2.68e-12	6.57e-11	14	17	0	8	1	0	15	244	0	0	259.2	0	0	19	2193	5	19	2064	2078	15	15	0	read	NM_001040181.1	9606	56650	CLDND1	C3orf4|GENX-3745|Z38	claudin domain containing 1	claudin domain-containing protein 1|claudin domain containing 1 protein|membrane protein GENX-3745	NM_001040181.1	NP_001035271.1	NC_000003.12	protein-coding	VALIDATED	3	-	98515472	98523065	Reference GRCh38.p12 Primary Assembly
hsa-mir-411_20g	NM_020122.4	1	651.4	651.4	8.36e-09	2.31e-07	4	4	0	10	1	0	11	240	0	0	211.4	0	0	19	7555	8	18	1315	1325	11	11	0	read	NM_020122.4	9606	56888	KCMF1	DEBT91|FIGC|PCMF|ZZZ1	potassium channel modulatory factor 1	E3 ubiquitin-protein ligase KCMF1|FGF-induced in gastric cancer|FGF-induced ubiquitin-protein ligase in gastric cancers|RING-type E3 ubiquitin transferase KCMF1|ZZ-type zinc finger-containing protein 1|differentially expressed in branching tubulogenesis 91|zinc finger, ZZ domain containing 1	NM_020122.4	NP_064507.3	NC_000002.12	protein-coding	VALIDATED	2	+	84971107	85059471	Reference GRCh38.p12 Primary Assembly
hsa-mir-411_20g	NM_020179.2	1	614.9	614.9	3.39e-06	4.75e-05	3	3	2.18e-14	4.5	1	0	18	248	12	0	171.9	0	0	19	979	1	18	643	660	18	18	0	read	NM_020179.2	9606	56935	SMCO4	C11orf75|FN5	single-pass membrane protein with coiled-coil domains 4	single-pass membrane and coiled-coil domain-containing protein 4|UPF0443 protein C11orf75	NM_020179.2	NP_064564.1	NC_000011.10	protein-coding	VALIDATED	11	-	93478471	93553978	Reference GRCh38.p12 Primary Assembly
hsa-mir-411_20g	NM_001007466.2	1	156.3	156.3	0.274	0.278	1	1	6.54e-06	8	1	0	12	32	-10	0	36.3	0	0	19	8622	4	15	6603	6614	12	12	11	read	NM_001007466.2	9606	56995	TULP4	TUSP	tubby like protein 4	tubby-related protein 4|tubby super-family protein|tubby superfamily protein	NM_001007466.2	NP_001007467.1	NC_000006.12	protein-coding	VALIDATED	6	+	158232235	158511827	Reference GRCh38.p12 Primary Assembly
hsa-mir-411_20g	NM_020381.3	1	618.9	618.9	1.05e-07	9.33e-07	2	2	3.54e-10	9	1	0	11	252	0	0	236.9	0	0	19	3568	9	19	814	824	11	11	0	read	NM_020381.3	9606	57107	PDSS2	C6orf210|COQ10D3|DLP1|bA59I9.3|hDLP1	decaprenyl diphosphate synthase subunit 2	decaprenyl-diphosphate synthase subunit 2|all-trans-decaprenyl-diphosphate synthase subunit 2|decaprenyl pyrophosphate synthase subunit 2|decaprenyl pyrophosphate synthetase subunit 2|prenyl (decaprenyl) diphosphate synthase, subunit 2|subunit 2 of decaprenyl diphosphate synthase	NM_020381.3	NP_065114.3	NC_000006.12	protein-coding	REVIEWED	6	-	107152556	107459680	Reference GRCh38.p12 Primary Assembly
hsa-mir-411_20g	NM_001127257.1	1	1287.4	1287.4	0	0	19	20	0	7.5	1	0	18	244	12	0	235.4	0	0	19	5386	2	19	4891	4908	18	18	0	read	NM_001127257.1	9606	57181	SLC39A10	LZT-Hs2	solute carrier family 39 member 10	zinc transporter ZIP10|ZIP-10|solute carrier family 39 (metal ion transporter), member 10|solute carrier family 39 (zinc transporter), member 10|zrt- and Irt-like protein 10	NM_001127257.1	NP_001120729.1	NC_000002.12	protein-coding	VALIDATED	2	+	195575943	195737701	Reference GRCh38.p12 Primary Assembly
hsa-mir-411_20g	NM_001267606.1	1	519.2	519.2	9.22e-09	1.46e-08	1	1	6.54e-06	8	1	0	18	244	16	0	183.2	0	0	19	4228	2	19	1299	1316	18	18	0	read	NM_001267606.1	9606	57209	ZNF248	bA162G10.3	zinc finger protein 248	zinc finger protein 248|KRAB protein domain|Kruppel-type zinc finger protein|bA162G10.3 (zinc finger protein)	NM_001267606.1	NP_001254535.1	NC_000010.11	protein-coding	VALIDATED	10	-	37758451	37858201	Reference GRCh38.p12 Primary Assembly
hsa-mir-411_20g	NM_001297776.1	1	653.7	653.7	6.06e-06	8.92e-05	2	4	1.82e-05	7	1	0	14	240	0	0	279.7	0	0	19	5037	5	18	3126	3139	14	14	0	read	NM_001297776.1	9606	57494	RIMKLB	FAM80B|NAAGS|NAAGS-I	ribosomal modification protein rimK like family member B	beta-citrylglutamate synthase B|N-acetyl-aspartyl-glutamate synthetase B|N-acetyl-aspartylglutamate synthetase B|N-acetylaspartyl-glutamate synthetase B|NAAG synthetase B|beta-citryl-glutamate synthase B|family with sequence similarity 80, member B|ribosomal protein S6 modification-like protein B	NM_001297776.1	NP_001284705.1	NC_000012.12	protein-coding	VALIDATED	12	+	8681676	8783097	Reference GRCh38.p12 Primary Assembly
hsa-mir-411_20g	NM_001303402.1	1	546.4	546.4	6.99e-06	1.8e-05	1	1	6.54e-06	7.5	1	0	17	252	4	0	204.4	0	0	19	3948	3	19	510	526	17	17	0	read	NM_001303402.1	9606	57599	WDR48	P80|SPG60|UAF1	WD repeat domain 48	WD repeat-containing protein 48|USP1 associated factor 1|WD repeat endosomal protein|testicular tissue protein Li 224	NM_001303402.1	NP_001290331.1	NC_000003.12	protein-coding	REVIEWED	3	+	39051985	39096670	Reference GRCh38.p12 Primary Assembly
hsa-mir-411_20g	NM_173602.2	3	1725.5	590.8	0.000597	0.00272	1	1	6.54e-06	5.5	1	0	19	252	4	0	244.8	0	0	19	8715	1	19	6818	6836	19	19	0	read	NM_173602.2	9606	57609	DIP2B	-	disco interacting protein 2 homolog B	disco-interacting protein 2 homolog B|DIP2 disco-interacting protein 2 homolog B	NM_173602.2	NP_775873.2	NC_000012.12	protein-coding	REVIEWED	12	+	50504984	50748666	Reference GRCh38.p12 Primary Assembly
hsa-mir-411_20g	NM_001320238.1	1	522.2	522.2	9.89e-05	0.000251	1	1	6.54e-06	11	1	0	8	312	0	0	130.2	0	0	19	5328	12	19	339	346	8	8	0	read	NM_001320238.1	9606	57610	RANBP10	-	RAN binding protein 10	ran-binding protein 10	NM_001320238.1	NP_001307167.1	NC_000016.10	protein-coding	REVIEWED	16	-	67723065	67806651	Reference GRCh38.p12 Primary Assembly
hsa-mir-411_20g	NM_001346229.1	1	664.4	664.4	6.78e-05	0.0012	2	2	3.54e-10	11	1	0	8	312	0	0	232.4	0	0	19	5556	12	19	2606	2613	8	8	0	read	NM_001346229.1	9606	57614	RELCH	HsT3308|HsT885|KIAA1468	RAB11 binding and LisH domain, coiled-coil and HEAT repeat containing	lisH domain and HEAT repeat-containing protein KIAA1468	NM_001346229.1	NP_001333158.1	NC_000018.10	protein-coding	VALIDATED	18	+	62187254	62307121	Reference GRCh38.p12 Primary Assembly
hsa-mir-411_20g	NM_020940.3	1	650	650	1.78e-06	2.36e-05	3	6	2.12e-07	7.5	1	0	17	240	8	0	236	0	0	19	5828	2	18	3793	3809	17	17	0	read	NM_020940.3	9606	57700	FAM160B1	KIAA1600|bA106M7.3	family with sequence similarity 160 member B1	protein FAM160B1	NM_020940.3	NP_065991.3	NC_000010.11	protein-coding	VALIDATED	10	+	114821743	114899826	Reference GRCh38.p12 Primary Assembly
hsa-mir-411_20g	NM_001330660.1	2	1103.8	582.2	0.00231	0.00621	1	1	6.54e-06	8.5	1	0	13	240	0	0	258.2	0	0	19	3793	6	18	2141	2153	13	13	0	read	NM_001330660.1	9606	57704	GBA2	AD035|NLGase|SPG46	glucosylceramidase beta 2	non-lysosomal glucosylceramidase|beta-glucocerebrosidase 2|glucosidase, beta (bile acid) 2|glucosylceramidase 2	NM_001330660.1	NP_001317589.1	NC_000009.12	protein-coding	REVIEWED	9	-	35736861	35749235	Reference GRCh38.p12 Primary Assembly
hsa-mir-411_20g	NM_001077700.2	1	638.4	638.4	8.22e-06	6.99e-05	2	5	0.000165	6.5	1	0	18	244	8	0	261.4	0	0	19	5569	2	19	4057	4074	18	18	0	read	NM_001077700.2	9606	57708	MIER1	ER1|MI-ER1	MIER1 transcriptional regulator	mesoderm induction early response protein 1|mesoderm induction early response 1 homolog|mesoderm induction early response 1, transcriptional regulator	NM_001077700.2	NP_001071168.2	NC_000001.11	protein-coding	REVIEWED	1	+	66924894	66988618	Reference GRCh38.p12 Primary Assembly
hsa-mir-411_20g	NM_001204456.1	1	821.7	821.7	9.41e-10	2.63e-08	7	7	0	9	1	0	11	312	0	0	182.7	0	0	19	6356	9	19	2239	2249	11	11	0	read	NM_001204456.1	9606	57786	RBAK	ZNF769	RB associated KRAB zinc finger	RB-associated KRAB zinc finger protein|RB-associated KRAB repressor|zinc finger protein 769	NM_001204456.1	NP_001191385.1	NC_000007.14	protein-coding	REVIEWED	7	+	5045820	5069487	Reference GRCh38.p12 Primary Assembly
hsa-mir-411_20g	NM_001271213.1	1	552.4	552.4	8.16e-06	2.73e-05	2	2	3.54e-10	11.5	1	0	8	244	0	0	190.4	0	0	19	1810	12	19	1329	1336	8	8	0	read	NM_001271213.1	9606	58472	SQOR	CGI-44|PRO1975|SQR|SQRDL	sulfide quinone oxidoreductase	sulfide:quinone oxidoreductase, mitochondrial|sulfide dehydrogenase like|sulfide quinone reductase-like	NM_001271213.1	NP_001258142.1	NC_000015.10	protein-coding	REVIEWED	15	+	45631147	45691293	Reference GRCh38.p12 Primary Assembly
hsa-mir-411_20g	NM_001153446.1	1	864.3	864.3	5.17e-08	4.76e-07	8	15	0	6	1	0	19	252	8	0	237.3	0	0	19	1876	1	19	1641	1659	19	19	0	read	NM_001153446.1	9606	60592	SCOC	HRIHFB2072|SCOCO|UNC-69	short coiled-coil protein	short coiled-coil protein	NM_001153446.1	NP_001146918.1	NC_000004.12	protein-coding	REVIEWED	4	+	140257285	140382555	Reference GRCh38.p12 Primary Assembly
hsa-mir-411_20g	NM_001040284.2	1	566.5	566.5	0.000897	0.00312	2	2	3.54e-10	10.5	1	0	11	152	0	0	300.5	0	0	19	8114	8	18	3320	3330	11	11	0	read	NM_001040284.2	9606	64282	TENT4B	PAPD5|TRF4-2|TUT3	terminal nucleotidyltransferase 4B	non-canonical poly(A) RNA polymerase PAPD5|PAP associated domain containing 5|PAP-associated domain-containing protein 5|TUTase 3|poly(A) RNA polymerase D5, non-canonical|terminal uridylyltransferase 3|topoisomerase-related function protein 4-2	NM_001040284.2	NP_001035374.2	NC_000016.10	protein-coding	VALIDATED	16	+	50152917	50235309	Reference GRCh38.p12 Primary Assembly
hsa-mir-411_20g	NM_022731.4	1	605.1	605.1	0.000142	0.001	3	3	2.18e-14	8.5	1	0	16	152	0	0	295.1	0	0	19	6471	3	18	3293	3308	16	16	0	read	NM_022731.4	9606	64710	NUCKS1	JC7|NUCKS	nuclear casein kinase and cyclin dependent kinase substrate 1	nuclear ubiquitous casein and cyclin-dependent kinase substrate 1|P1|nuclear ubiquitous casein kinase and cyclin-dependent kinase substrate|potential LAG1 interactor	NM_022731.4	NP_073568.2	NC_000001.11	protein-coding	REVIEWED	1	-	205712818	205750243	Reference GRCh38.p12 Primary Assembly
hsa-mir-411_20g	NM_001258217.1	1	585.3	585.3	5.8e-05	0.000393	2	2	3.54e-10	8	1	0	14	248	0	0	209.3	0	0	19	2701	5	18	1523	1536	14	14	0	read	NM_001258217.1	9606	79003	MIS12	2510025F08Rik|KNTC2AP|MTW1|hMis12	MIS12, kinetochore complex component	protein MIS12 homolog|MIS12 homolog|MIS12, MIND kinetochore complex component, homolog|homolog of yeast Mis12	NM_001258217.1	NP_001245146.1	NC_000017.11	protein-coding	VALIDATED	17	+	5486373	5490813	Reference GRCh38.p12 Primary Assembly
hsa-mir-411_20g	NM_001198953.1	1	546.7	546.7	2.59e-06	8.29e-06	1	1	6.54e-06	8	1	0	18	240	8	0	220.7	0	0	19	1524	1	18	1315	1332	18	18	0	read	NM_001198953.1	9606	79038	ZFYVE21	HCVP7TP1|ZF21	zinc finger FYVE-type containing 21	zinc finger FYVE domain-containing protein 21|FYVE domain containing 21|HCV p7-transactivated protein 1|zinc finger, FYVE domain containing 21	NM_001198953.1	NP_001185882.1	NC_000014.9	protein-coding	VALIDATED	14	+	103715743	103733667	Reference GRCh38.p12 Primary Assembly
hsa-mir-411_20g	NM_024523.5	1	512.6	512.6	0.00278	0.00432	1	1	6.54e-06	6.5	1	0	18	244	16	0	166.6	0	0	19	4152	2	19	3245	3262	18	18	0	read	NM_024523.5	9606	79571	GCC1	GCC1P|GCC88	GRIP and coiled-coil domain containing 1	GRIP and coiled-coil domain-containing protein 1|golgi coiled-coil 1|golgi coiled-coil protein 1|peripheral membrane Golgi protein	NM_024523.5	NP_078799.2	NC_000007.14	protein-coding	REVIEWED	7	-	127580627	127585599	Reference GRCh38.p12 Primary Assembly
hsa-mir-411_20g	NM_001321193.1	1	582	582	2.63e-06	1.28e-05	1	1	6.54e-06	6.5	1	0	18	312	8	0	175	0	0	19	7969	2	19	1903	1920	18	18	0	read	NM_001321193.1	9606	79718	TBL1XR1	C21|DC42|IRA1|MRD41|TBLR1	transducin beta like 1 X-linked receptor 1	F-box-like/WD repeat-containing protein TBL1XR1|TBL1-related protein 1|nuclear receptor co-repressor/HDAC3 complex subunit|nuclear receptor corepressor/HDAC3 complex subunit TBLR1	NM_001321193.1	NP_001308122.1	NC_000003.12	protein-coding	REVIEWED	3	-	177019354	177197356	Reference GRCh38.p12 Primary Assembly
hsa-mir-411_20g	NM_024721.4	2	1121.9	643.8	0.00881	0.0476	1	1	6.54e-06	9.5	1	0	10	320	0	0	235.8	0	0	19	13975	10	19	5057	5066	10	10	0	read	NM_024721.4	9606	79776	ZFHX4	ZFH4|ZHF4	zinc finger homeobox 4	zinc finger homeobox protein 4|zinc-finger homeodomain protein 4	NM_024721.4	NP_078997.4	NC_000008.11	protein-coding	VALIDATED	8	+	76681218	76867284	Reference GRCh38.p12 Primary Assembly
hsa-mir-411_20g	NM_001006935.2	1	650.1	650.1	0.000466	0.00377	1	1	6.54e-06	11	1	0	8	312	0	0	258.1	0	0	19	1312	12	19	1165	1172	8	8	0	read	NM_001006935.2	9606	79921	TCEAL4	NPD017|WEX7	transcription elongation factor A like 4	transcription elongation factor A protein-like 4|TCEA-like protein 4|transcription elongation factor A (SII)-like 4|transcription elongation factor S-II protein-like 4	NM_001006935.2	NP_001006936.1	NC_000023.11	protein-coding	REVIEWED	X	+	103576230	103587735	Reference GRCh38.p12 Primary Assembly
hsa-mir-411_20g	NM_001287437.1	1	512.4	512.4	0.00181	0.00302	1	1	6.54e-06	11	1	0	9	240	0	0	193.4	0	0	19	5736	10	18	3542	3550	9	9	0	read	NM_001287437.1	9606	79960	JADE1	PHF17	jade family PHD finger 1	protein Jade-1|PHD finger protein 17|PHD protein Jade-1|gene for apoptosis and differentiation in epithelia|jade family PHD finger protein 1	NM_001287437.1	NP_001274366.1	NC_000004.12	protein-coding	VALIDATED	4	+	128809622	128875223	Reference GRCh38.p12 Primary Assembly
hsa-mir-411_20g	NM_024949.5	1	581.3	581.3	1.11e-05	6.93e-05	1	1	6.54e-06	7	1	0	18	244	24	0	230.3	0	0	19	8822	2	19	676	693	18	18	0	read	NM_024949.5	9606	80014	WWC2	BOMB	WW and C2 domain containing 2	protein WWC2|BH3-only member B protein|WW, C2 and coiled-coil domain containing 2	NM_024949.5	NP_079225.5	NC_000004.12	protein-coding	REVIEWED	4	+	183098639	183320776	Reference GRCh38.p12 Primary Assembly
hsa-mir-411_20g	NM_145663.2	1	544.3	544.3	0.00153	0.00432	1	1	6.54e-06	6.5	1	0	19	244	8	0	207.3	0	0	19	3083	1	19	2554	2572	19	19	0	read	NM_145663.2	9606	80174	DBF4B	ASKL1|CHIFB|DRF1|ZDBF1B	DBF4 zinc finger B	protein DBF4 homolog B|ASK-like protein 1|DBF4 homolog B|Dbf4-related factor 1|activator of S-phase kinase-like protein 1|chiffon homolog B|zinc finger, DBF-type containing 1B	NM_145663.2	NP_663696.1	NC_000017.11	protein-coding	REVIEWED	17	+	44708580	44752731	Reference GRCh38.p12 Primary Assembly
hsa-mir-411_20g	NM_001320818.1	1	233.5	233.5	0.0645	0.0669	1	1	6.54e-06	5	1	0	16	84	-10	0	54.5	0	0	19	2090	1	16	639	654	16	16	12	read	NM_001320818.1	9606	80219	COQ10B	-	coenzyme Q10B	coenzyme Q-binding protein COQ10 homolog B, mitochondrial|coenzyme Q10 homolog B	NM_001320818.1	NP_001307747.1	NC_000002.12	protein-coding	VALIDATED	2	+	197453422	197475308	Reference GRCh38.p12 Primary Assembly
hsa-mir-411_20g	NM_025205.4	1	718.8	718.8	2.83e-10	1.26e-08	3	12	0.000739	8	1	0	17	244	8	0	309.8	0	0	19	2394	3	19	697	713	17	17	0	read	NM_025205.4	9606	80306	MED28	1500003D12Rik|EG1|magicin	mediator complex subunit 28	mediator of RNA polymerase II transcription subunit 28|endothelial-derived gene 1|endothelial-derived protein 1|mediator of RNA polymerase II transcription, subunit 28 homolog|merlin and Grb2-interacting cytoskeletal protein|tumor angiogenesis marker EG-1	NM_025205.4	NP_079481.2	NC_000004.12	protein-coding	VALIDATED	4	+	17614627	17625627	Reference GRCh38.p12 Primary Assembly
hsa-mir-411_20g	NM_001160147.1	1	947.4	947.4	2.27e-09	5.7e-08	9	9	0	4.5	1	1	19	240	24	0	281.4	0	0	19	12906	1	18	1723	1741	18	19	0	read	NM_001160147.1	9606	80821	DDHD1	PA-PLA1|PAPLA1|SPG28	DDHD domain containing 1	phospholipase DDHD1|phosphatidic acid-preferring phospholipase A1 homolog|phosphatidic acid-preferring phospholipase A1-like protein|spastic paraplegia 28 (autosomal recessive)	NM_001160147.1	NP_001153619.1	NC_000014.9	protein-coding	REVIEWED	14	-	53036739	53153327	Reference GRCh38.p12 Primary Assembly
hsa-mir-411_20g	NM_001306199.1	1	600.6	600.6	0.00168	0.00524	2	2	3.54e-10	11.5	1	0	8	244	0	0	238.6	0	0	19	2140	12	19	1151	1158	8	8	0	read	NM_001306199.1	9606	80854	SETD7	KMT7|SET7|SET7/9|SET9	SET domain containing lysine methyltransferase 7	histone-lysine N-methyltransferase SETD7|H3-K4-HMTase SETD7|SET domain-containing protein 7|histone H3-K4 methyltransferase SETD7|histone H3-lysine 4-specific methyltransferase|lysine N-methyltransferase 7	NM_001306199.1	NP_001293128.1	NC_000004.12	protein-coding	VALIDATED	4	-	139495933	139556768	Reference GRCh38.p12 Primary Assembly
hsa-mir-411_20g	NM_001172223.2	1	566.9	566.9	2.42e-05	0.000239	2	2	3.54e-10	4	1	1	17	240	44	0	149.9	0	0	19	1771	2	18	845	860	17	16	0	read	NM_001172223.2	9606	81532	MOB2	HCCA2	MOB kinase activator 2	MOB kinase activator 2|MOB2 Mps One Binder homolog|Mps one binder kinase activator-like 2	NM_001172223.2	NP_001165694.1	NC_000011.10	protein-coding	VALIDATED	11	-	1469447	1486778	Reference GRCh38.p12 Primary Assembly
hsa-mir-411_20g	NM_001127711.2	1	569.4	569.4	9.12e-05	0.000472	1	5	0.0619	8	1	0	15	244	0	0	242.4	0	0	19	890	5	19	453	467	15	15	0	read	NM_001127711.2	9606	81853	TMEM14B	-	transmembrane protein 14B	transmembrane protein 14B	NM_001127711.2	NP_001121183.1	NC_000006.12	protein-coding	VALIDATED	6	+	10747758	10759773	Reference GRCh38.p12 Primary Assembly
hsa-mir-411_20g	NM_001031726.3	1	945.2	945.2	2.48e-09	5.7e-08	8	43	2.13e-05	5.5	1	0	19	312	8	0	251.2	0	0	19	4412	1	19	1419	1437	19	19	0	read	NM_001031726.3	9606	83636	C19orf12	MPAN|NBIA3|NBIA4|SPG43	chromosome 19 open reading frame 12	protein C19orf12|membrane protein-associated neurodegeneration|neurodegeneration with brain iron accumulation 3	NM_001031726.3	NP_001026896.2	NC_000019.10	protein-coding	VALIDATED	19	-	29698885	29715788	Reference GRCh38.p12 Primary Assembly
hsa-mir-411_20g	NM_001244638.1	1	611.8	611.8	0.000392	0.0013	2	2	3.54e-10	6	1	0	15	240	0	0	231.8	0	0	19	7032	4	18	4599	4613	15	15	0	read	NM_001244638.1	9606	84159	ARID5B	DESRT|MRF-2|MRF2	AT-rich interaction domain 5B	AT-rich interactive domain-containing protein 5B|ARID domain-containing protein 5B|AT-rich interactive domain 5B (MRF1-like)|MRF1-like protein|modulator recognition factor 2 (MRF2)	NM_001244638.1	NP_001231567.1	NC_000010.11	protein-coding	REVIEWED	10	+	61901253	62096947	Reference GRCh38.p12 Primary Assembly
hsa-mir-411_20g	NM_032270.4	1	539.1	539.1	4.05e-05	0.000138	1	2	0.00175	6.5	1	0	18	152	12	0	290.1	0	0	19	7207	1	18	3640	3657	18	18	0	read	NM_032270.4	9606	84230	LRRC8C	AD158|FAD158	leucine rich repeat containing 8 VRAC subunit C	volume-regulated anion channel subunit LRRC8C|factor for adipocyte differentiation 158|hypothetical protein AD158|leucine rich repeat containing 8 family member C|leucine rich repeat containing 8C|leucine-rich repeat-containing protein 8C	NM_032270.4	NP_115646.2	NC_000001.11	protein-coding	VALIDATED	1	+	89615809	89719534	Reference GRCh38.p12 Primary Assembly
hsa-mir-411_20g	NM_032315.2	1	1213.7	1213.7	1.6e-12	8.16e-11	16	16	0	6.5	1	0	19	312	4	0	214.7	0	0	19	1476	1	19	301	319	19	19	0	read	NM_032315.2	9606	84275	SLC25A33	BMSC-MCP|PNC1	solute carrier family 25 member 33	solute carrier family 25 member 33|PNC1 protein|bone marrow stromal cell mitochondrial carrier protein|huBMSC-MCP|mitochondrial carrier protein|novel mitochondrial carrier protein|solute carrier family 25 (pyrimidine nucleotide carrier), member 33	NM_032315.2	NP_115691.1	NC_000001.11	protein-coding	VALIDATED	1	+	9539468	9582772	Reference GRCh38.p12 Primary Assembly
hsa-mir-411_20g	NM_001170765.1	1	621.6	621.6	0.000276	0.00248	1	1	6.54e-06	8	1	0	15	312	0	0	224.6	0	0	19	10370	5	19	791	805	15	15	0	read	NM_001170765.1	9606	84458	LCOR	C10orf12|MLR2	ligand dependent nuclear receptor corepressor	ligand-dependent corepressor|mblk1-related protein 2	NM_001170765.1	NP_001164236.1	NC_000010.11	protein-coding	VALIDATED	10	+	96832259	96986211	Reference GRCh38.p12 Primary Assembly
hsa-mir-411_20g	NM_001322080.1	2	1195.2	663.3	8.77e-08	3.13e-06	2	3	4.77e-07	8	1	0	15	312	0	0	228.3	0	0	19	5429	5	19	3270	3284	15	15	0	read	NM_001322080.1	9606	84804	MFSD9	-	major facilitator superfamily domain containing 9	major facilitator superfamily domain-containing protein 9	NM_001322080.1	NP_001309009.1	NC_000002.12	protein-coding	VALIDATED	2	-	102713866	102736887	Reference GRCh38.p12 Primary Assembly
hsa-mir-411_20g	NM_032773.3	1	726.2	726.2	3.41e-06	0.000321	6	11	2.35e-14	10	1	0	11	244	0	0	204.2	0	0	19	2325	9	19	802	812	11	11	0	read	NM_032773.3	9606	84859	LRCH3	-	leucine rich repeats and calponin homology domain containing 3	leucine-rich repeat and calponin homology domain-containing protein 3|leucine-rich repeats and calponin homology (CH) domain containing 3	NM_032773.3	NP_116162.1	NC_000003.12	protein-coding	VALIDATED	3	+	197791225	197889493	Reference GRCh38.p12 Primary Assembly
hsa-mir-411_20g	NM_032846.3	1	1217.2	1217.2	3.33e-16	2.2e-14	16	16	0	5.5	1	0	18	244	16	0	263.2	0	0	19	2956	2	19	2166	2183	18	18	0	read	NM_032846.3	9606	84932	RAB2B	-	RAB2B, member RAS oncogene family	ras-related protein Rab-2B|GTP-binding protein RAB2B|RAS family, member RAB2B	NM_032846.3	NP_116235.2	NC_000014.9	protein-coding	VALIDATED	14	-	21459019	21476972	Reference GRCh38.p12 Primary Assembly
hsa-mir-411_20g	NM_033132.4	1	836.8	836.8	1.11e-11	2.78e-10	8	12	0	7.5	1	0	18	152	8	0	322.8	0	0	19	4657	1	18	2851	2868	18	18	0	read	NM_033132.4	9606	85416	ZIC5	-	Zic family member 5	zinc finger protein ZIC 5|Zic family member 5 (odd-paired homolog, Drosophila)|zinc finger protein of the cerebellum 5	NM_033132.4	NP_149123.2	NC_000013.11	protein-coding	REVIEWED	13	-	99962963	99971908	Reference GRCh38.p12 Primary Assembly
hsa-mir-411_20g	NM_001271999.1	1	553.6	553.6	0.000396	0.00152	1	1	6.54e-06	7	1	0	17	240	12	0	215.6	0	0	19	7193	2	18	5201	5217	17	17	0	read	NM_001271999.1	9606	85440	DOCK7	EIEE23|ZIR2	dedicator of cytokinesis 7	dedicator of cytokinesis protein 7	NM_001271999.1	NP_001258928.1	NC_000001.11	protein-coding	REVIEWED	1	-	62454725	62688367	Reference GRCh38.p12 Primary Assembly
hsa-mir-411_20g	NM_001282129.1	1	751.8	751.8	1.59e-06	0.000118	6	6	0	7.5	1	0	18	240	4	0	226.8	0	0	19	9493	1	18	2977	2994	18	18	0	read	NM_001282129.1	9606	85464	SSH2	SSH-2|SSH-2L	slingshot protein phosphatase 2	protein phosphatase Slingshot homolog 2|SSH-like protein 2	NM_001282129.1	NP_001269058.1	NC_000017.11	protein-coding	REVIEWED	17	-	29625937	29930238	Reference GRCh38.p12 Primary Assembly
hsa-mir-411_20g	NM_001143905.2	1	584.8	584.8	0	0	1	1	6.54e-06	6	1	0	18	252	8	0	232.8	0	0	19	1608	2	19	662	679	18	18	0	read	NM_001143905.2	9606	91574	C12orf65	COXPD7|SPG55	chromosome 12 open reading frame 65	probable peptide chain release factor C12orf65, mitochondrial	NM_001143905.2	NP_001137377.1	NC_000012.12	protein-coding	REVIEWED	12	+	123233296	123257958	Reference GRCh38.p12 Primary Assembly
hsa-mir-411_20g	NR_033339.1	1	558.5	558.5	7.29e-07	2.44e-06	1	1	6.54e-06	11	1	0	9	240	0	0	239.5	0	0	19	2945	10	18	1580	1588	9	9	0	read	NR_033339.1	9606	92070	CTBP1-DT	C4orf42|CTBP1-AS1|CTBP1-AS2	CTBP1 divergent transcript	CTBP1 antisense RNA 1 (head to head)|CTBP1 antisense RNA 1 (non-protein coding)|CTBP1 antisense RNA 2 (head to head)	NR_033339.1	-	NC_000004.12	ncRNA	VALIDATED	4	+	1249439	1253006	Reference GRCh38.p12 Primary Assembly
hsa-mir-411_20g	NM_001033553.2	1	518.6	518.6	0.00109	0.00223	1	1	6.54e-06	8.5	1	0	12	244	0	0	185.6	0	0	19	3970	8	19	3322	3333	12	12	0	read	NM_001033553.2	9606	92521	SPECC1	CYTSB|HCMOGT-1|HCMOGT1|NSP	sperm antigen with calponin homology and coiled-coil domains 1	cytospin-B|NSP5|cytokinesis and spindle organization B|nuclear structure protein 5|sperm antigen HCMOGT-1|sperm antigen with calponin-like and coiled coil domains 1|structure protein NSP5a3a|structure protein NSP5a3b|structure protein NSP5b3a|structure protein NSP5b3b	NM_001033553.2	NP_001028725.1	NC_000017.11	protein-coding	REVIEWED	17	+	20009300	20319025	Reference GRCh38.p12 Primary Assembly
hsa-mir-411_20g	NM_001330365.1	1	1592.2	1592.2	0	0	28	31	0	8.5	1	0	17	152	16	0	270.2	0	0	19	4491	2	18	4065	4081	17	17	0	read	NM_001330365.1	9606	93134	ZNF561	-	zinc finger protein 561	zinc finger protein 561	NM_001330365.1	NP_001317294.1	NC_000019.10	protein-coding	VALIDATED	19	-	9607325	9621262	Reference GRCh38.p12 Primary Assembly
hsa-mir-411_20g	NM_178191.2	1	537.8	537.8	0.00161	0.00323	1	1	6.54e-06	10	1	0	11	240	0	0	217.8	0	0	19	1944	8	18	945	955	11	11	0	read	NM_178191.2	9606	93974	ATP5IF1	ATPI|ATPIF1|ATPIP|IP	ATP synthase inhibitory factor subunit 1	ATPase inhibitor, mitochondrial|ATP synthase inhibitor protein|ATPase inhibitor protein|ATPase inhibitory factor 1|IF(1)|IF1|inhibitor of F(1)F(o)-ATPase	NM_178191.2	NP_835498.1	NC_000001.11	protein-coding	REVIEWED	1	+	28236090	28238104	Reference GRCh38.p12 Primary Assembly
hsa-mir-411_20g	NM_033550.3	1	630.5	630.5	7.96e-05	0.000971	1	1	6.54e-06	7	1	0	14	312	0	0	226.5	0	0	19	3384	6	19	598	611	14	14	0	read	NM_033550.3	9606	112858	TP53RK	BUD32|C20orf64|GAMOS4|Nori-2|Nori-2p|PRPK|dJ101A2	TP53 regulating kinase	EKC/KEOPS complex subunit TP53RK|atypical serine/threonine protein kinase TP53RK|p53-related protein kinase	NM_033550.3	NP_291028.3	NC_000020.11	protein-coding	VALIDATED	20	-	46684364	46689636	Reference GRCh38.p12 Primary Assembly
hsa-mir-411_20g	NM_052897.3	1	533.9	533.9	5.36e-05	0.000155	1	1	6.54e-06	8.5	1	0	14	240	0	0	210.9	0	0	19	4214	5	18	414	427	14	14	0	read	NM_052897.3	9606	114785	MBD6	-	methyl-CpG binding domain protein 6	methyl-CpG-binding domain protein 6|methyl-CpG-binding protein MBD6	NM_052897.3	NP_443129.3	NC_000012.12	protein-coding	VALIDATED	12	+	57520709	57530147	Reference GRCh38.p12 Primary Assembly
hsa-mir-411_20g	NM_052932.2	1	1655.7	1655.7	0	0	28	29	0	11.5	1	0	8	244	0	0	253.7	0	0	19	3605	12	19	2954	2961	8	8	0	read	NM_052932.2	9606	114908	TMEM123	KCT3|PORIMIN|PORMIN	transmembrane protein 123	porimin|KCT-3|keratinocytes associated transmembrane protein 3|pro-oncosis receptor inducing membrane injury|serine/threonine-rich receptor	NM_052932.2	NP_443164.2	NC_000011.10	protein-coding	REVIEWED	11	-	102396324	102453043	Reference GRCh38.p12 Primary Assembly
hsa-mir-411_20g	NM_053053.3	1	175.1	175.1	0.171	0.185	1	1	6.54e-06	8	1	0	12	32	-10	0	61.1	0	0	19	2276	6	17	2174	2185	12	12	11	read	NM_053053.3	9606	117143	TADA1	ADA1|HFI1|STAF42|TADA1L|hADA1	transcriptional adaptor 1	transcriptional adapter 1|SPT3-associated factor 42 (STAF42)|transcriptional adapter 1-like protein|transcriptional adaptor 1 (HFI1 homolog, yeast)	NM_053053.3	NP_444281.1	NC_000001.11	protein-coding	VALIDATED	1	-	166856509	166876416	Reference GRCh38.p12 Primary Assembly
hsa-mir-411_20g	NM_213598.3	1	706.4	706.4	3.66e-05	0.000714	5	7	3.33e-16	9.5	1	0	12	240	0	0	226.4	0	0	19	3671	7	18	3071	3082	12	12	0	read	NM_213598.3	9606	125919	ZNF543	-	zinc finger protein 543	zinc finger protein 543	NM_213598.3	NP_998763.2	NC_000019.10	protein-coding	VALIDATED	19	+	57320496	57330775	Reference GRCh38.p12 Primary Assembly
hsa-mir-411_20g	NM_153713.2	2	1705.7	1215.4	2.41e-11	1.78e-09	17	17	0	9	1	0	13	240	0	0	254.4	0	0	19	3992	6	18	1310	1322	13	13	0	read	NM_153713.2	9606	128077	LIX1L	-	limb and CNS expressed 1 like	LIX1-like protein|Lix1 homolog-like	NM_153713.2	NP_714924.1	NC_000001.11	protein-coding	VALIDATED	1	-	145933422	145958037	Reference GRCh38.p12 Primary Assembly
hsa-mir-411_20g	NR_003239.1	1	557.4	557.4	0.029	0.0571	1	1	6.54e-06	6.5	1	0	17	244	16	0	204.4	0	0	19	1101	3	19	512	528	17	17	0	read	NR_003239.1	9606	128439	SNHG11	C20orf198|LINC00101|NCRNA00101	small nucleolar RNA host gene 11	long intergenic non-protein coding RNA 101|small nucleolar RNA host gene (non-protein coding) 11|small nucleolar RNA host gene 11 (non-protein coding)	NR_003239.1	-	NC_000020.11	ncRNA	VALIDATED	20	+	38446653	38450920	Reference GRCh38.p12 Primary Assembly
hsa-mir-411_20g	NM_152407.3	1	582.1	582.1	0.000575	0.00325	1	1	6.54e-06	8	1	0	17	244	8	0	251.1	0	0	19	4105	3	19	2745	2761	17	17	0	read	NM_152407.3	9606	134266	GRPEL2	Mt-GrpE#2	GrpE like 2, mitochondrial	grpE protein homolog 2, mitochondrial	NM_152407.3	NP_689620.2	NC_000005.10	protein-coding	VALIDATED	5	+	149345413	149354582	Reference GRCh38.p12 Primary Assembly
hsa-mir-411_20g	NM_001145152.1	2	1161.5	605.3	0.000383	0.0026	2	2	3.54e-10	9.5	1	0	12	240	0	0	245.3	0	0	19	4510	7	18	1197	1208	12	12	0	read	NM_001145152.1	9606	137492	VPS37A	HCRP1|PQBP2|SPG53	VPS37A, ESCRT-I subunit	vacuolar protein sorting-associated protein 37A|ESCRT-I complex subunit VPS37A|hepatocellular carcinoma-related protein 1|polyglutamine binding protein 2|vacuolar protein sorting 37 homolog A	NM_001145152.1	NP_001138624.1	NC_000008.11	protein-coding	REVIEWED	8	+	17246891	17333531	Reference GRCh38.p12 Primary Assembly
hsa-mir-411_20g	NM_080725.2	1	514.8	514.8	1.22e-08	1.87e-08	1	1	6.54e-06	8	1	0	14	240	0	0	186.8	0	0	19	2704	5	18	535	548	14	14	0	read	NM_080725.2	9606	140809	SRXN1	C20orf139|Npn3|SRX|SRX1	sulfiredoxin 1	sulfiredoxin-1	NM_080725.2	NP_542763.1	NC_000020.11	protein-coding	VALIDATED	20	-	646614	653369	Reference GRCh38.p12 Primary Assembly
hsa-mir-411_20g	NM_001330357.1	1	628.6	628.6	5.82e-05	0.00103	2	6	0.000725	10	1	0	12	244	0	0	268.6	0	0	19	3956	8	19	3691	3702	12	12	0	read	NM_001330357.1	9606	143684	FAM76B	-	family with sequence similarity 76 member B	protein FAM76B	NM_001330357.1	NP_001317286.1	NC_000011.10	protein-coding	VALIDATED	11	-	95768941	95790395	Reference GRCh38.p12 Primary Assembly
hsa-mir-411_20g	NM_001304350.1	1	530.3	530.3	3.07e-06	6.66e-06	1	1	6.54e-06	7	1	0	16	240	0	0	199.3	0	0	19	3416	3	18	1988	2003	16	16	0	read	NM_001304350.1	9606	148156	ZNF558	-	zinc finger protein 558	zinc finger protein 558	NM_001304350.1	NP_001291279.1	NC_000019.10	protein-coding	VALIDATED	19	-	8809575	8838143	Reference GRCh38.p12 Primary Assembly
hsa-mir-411_20g	NM_198077.3	1	675.5	675.5	6.41e-09	1.26e-07	3	6	2.12e-07	10	1	0	11	244	0	0	273.5	0	0	19	3275	9	19	727	737	11	11	0	read	NM_198077.3	9606	148423	C1orf52	gm117	chromosome 1 open reading frame 52	UPF0690 protein C1orf52|BCL10-associated gene protein	NM_198077.3	NP_932343.1	NC_000001.11	protein-coding	VALIDATED	1	-	85249952	85259676	Reference GRCh38.p12 Primary Assembly
hsa-mir-411_20g	NM_001144884.1	1	615.2	615.2	2.65e-05	0.00028	1	1	6.54e-06	7	1	0	19	244	12	0	281.2	0	0	19	7918	1	19	7225	7243	19	19	0	read	NM_001144884.1	9606	148867	SLC30A7	ZNT7|ZnT-7|ZnTL2	solute carrier family 30 member 7	zinc transporter 7|solute carrier family 30 (zinc transporter), member 7|zinc transporter ZnT-7|zinc transporter like 2|znt-like transporter 2	NM_001144884.1	NP_001138356.1	NC_000001.11	protein-coding	VALIDATED	1	+	100896075	100996912	Reference GRCh38.p12 Primary Assembly
hsa-mir-411_20g	NM_001128212.2	1	529.3	529.3	4.47e-06	1.05e-05	1	7	0.13	6	1	0	15	244	0	0	184.3	0	0	19	1928	5	19	403	417	15	15	0	read	NM_001128212.2	9606	151525	WDSUB1	UBOX6|WDSAM1	WD repeat, sterile alpha motif and U-box domain containing 1	WD repeat, SAM and U-box domain-containing protein 1	NM_001128212.2	NP_001121684.1	NC_000002.12	protein-coding	VALIDATED	2	-	159235792	159286798	Reference GRCh38.p12 Primary Assembly
hsa-mir-411_20g	NM_001080480.2	1	564.6	564.6	0.00233	0.00691	2	4	1.82e-05	8.5	1	0	14	244	0	0	201.6	0	0	19	4334	6	19	609	622	14	14	0	read	NM_001080480.2	9606	154141	MBOAT1	LPEAT1|LPLAT|LPLAT 1|LPSAT|OACT1|dJ434O11.1	membrane bound O-acyltransferase domain containing 1	lysophospholipid acyltransferase 1|1-acylglycerophosphoserine O-acyltransferase|O-acyltransferase (membrane bound) domain containing 1|O-acyltransferase domain-containing protein 1|lyso-PS acyltransferase|lysophosphatidylethanolamine acyltransferase 1|lysophosphatidylserine acyltransferase|membrane-bound O-acyltransferase domain-containing protein 1	NM_001080480.2	NP_001073949.1	NC_000006.12	protein-coding	REVIEWED	6	-	20099683	20212463	Reference GRCh38.p12 Primary Assembly
hsa-mir-411_20g	NM_001001661.2	1	687.8	687.8	2.65e-06	5.03e-05	4	4	0	9	1	0	13	244	0	0	243.8	0	0	19	3244	7	19	3193	3205	13	13	0	read	NM_001001661.2	9606	155054	ZNF425	-	zinc finger protein 425	zinc finger protein 425	NM_001001661.2	NP_001001661.1	NC_000007.14	protein-coding	VALIDATED	7	-	149102783	149126345	Reference GRCh38.p12 Primary Assembly
hsa-mir-411_20g	NM_001017420.2	1	575	575	0.000828	0.00315	1	1	6.54e-06	11.5	1	0	8	244	0	0	253	0	0	19	3376	12	19	1049	1056	8	8	0	read	NM_001017420.2	9606	157570	ESCO2	2410004I17Rik|EFO2|RBS	establishment of sister chromatid cohesion N-acetyltransferase 2	N-acetyltransferase ESCO2|ECO1 homolog 2	NM_001017420.2	NP_001017420.1	NC_000008.11	protein-coding	REVIEWED	8	+	27771948	27812429	Reference GRCh38.p12 Primary Assembly
hsa-mir-411_20g	NM_176814.4	1	561.1	561.1	8.11e-07	3.55e-06	1	1	6.54e-06	11.5	1	0	8	244	0	0	239.1	0	0	19	4489	12	19	713	720	8	8	0	read	NM_176814.4	9606	168850	ZNF800	-	zinc finger protein 800	zinc finger protein 800	NM_176814.4	NP_789784.2	NC_000007.14	protein-coding	VALIDATED	7	-	127342870	127392797	Reference GRCh38.p12 Primary Assembly
hsa-mir-411_20g	NM_139057.3	1	832.5	832.5	5.9e-13	1.36e-11	9	9	0	10.5	1	0	10	252	0	0	181.5	0	0	19	6358	10	19	5910	5919	10	10	0	read	NM_139057.3	9606	170691	ADAMTS17	WMS4	ADAM metallopeptidase with thrombospondin type 1 motif 17	A disintegrin and metalloproteinase with thrombospondin motifs 17|a disintegrin-like and metalloprotease (reprolysin type) with thrombospondin type 1 motif, 17	NM_139057.3	NP_620688.2	NC_000015.10	protein-coding	REVIEWED	15	-	99971437	100342923	Reference GRCh38.p12 Primary Assembly
hsa-mir-411_20g	NM_001347839.1	1	1947.9	1947.9	0	0	36	36	0	7	1	0	18	252	4	0	205.9	0	0	19	5703	2	19	3576	3593	18	18	0	read	NM_001347839.1	9606	196528	ARID2	BAF200|CSS6|p200	AT-rich interaction domain 2	AT-rich interactive domain-containing protein 2|ARID domain-containing protein 2|AT rich interactive domain 2 (ARID, RFX-like)|BRG1-associated factor 200|zinc finger protein with activation potential|zipzap/p200	NM_001347839.1	NP_001334768.1	NC_000012.12	protein-coding	REVIEWED	12	+	45729705	45908039	Reference GRCh38.p12 Primary Assembly
hsa-mir-411_20g	NM_178862.2	1	551.2	551.2	1.25e-06	4.06e-06	1	1	6.54e-06	8	1	0	14	244	0	0	219.2	0	0	19	4553	6	19	2146	2159	14	14	0	read	NM_178862.2	9606	201595	STT3B	CDG1X|SIMP|STT3-B	STT3B, catalytic subunit of the oligosaccharyltransferase complex	dolichyl-diphosphooligosaccharide--protein glycosyltransferase subunit STT3B|STT3, subunit of the oligosaccharyltransferase complex, homolog B|STT3B, subunit of the oligosaccharyltransferase complex (catalytic)|dolichyl-diphosphooligosaccharide protein glycotransferase|homolog of yeast STT3|oligosaccharyl transferase subunit STT3B|source of immunodominant MHC-associated peptides homolog	NM_178862.2	NP_849193.1	NC_000003.12	protein-coding	REVIEWED	3	+	31532500	31637621	Reference GRCh38.p12 Primary Assembly
hsa-mir-411_20g	NM_001002266.2	1	555.8	555.8	0.00074	0.00265	1	1	6.54e-06	10	1	0	11	240	0	0	235.8	0	0	19	4812	8	18	4140	4150	11	11	0	read	NM_001002266.2	9606	220972	MARCH8	CMIR|MARCH-VIII|MIR|RNF178|c-MIR	membrane associated ring-CH-type finger 8	E3 ubiquitin-protein ligase MARCH8|RING finger protein 178|RING-type E3 ubiquitin transferase MARCH8|c-mir, cellular modulator of immune recognition|cellular modulator of immune recognition (c-MIR)|membrane associated ring finger 8|membrane-associated RING finger protein 8|membrane-associated RING-CH protein VIII|membrane-associated ring finger (C3HC4) 8, E3 ubiquitin protein ligase	NM_001002266.2	NP_001002266.1	NC_000010.11	protein-coding	VALIDATED	10	-	45454584	45594905	Reference GRCh38.p12 Primary Assembly
hsa-mir-411_20g	NM_152735.3	1	958	958	0	0	12	12	0	6.5	1	0	18	244	16	0	171	0	0	19	2730	2	19	738	755	18	18	0	read	NM_152735.3	9606	221504	ZBTB9	ZNF919	zinc finger and BTB domain containing 9	zinc finger and BTB domain-containing protein 9	NM_152735.3	NP_689948.1	NC_000006.12	protein-coding	VALIDATED	6	+	33454578	33457543	Reference GRCh38.p12 Primary Assembly
hsa-mir-411_20g	NR_002936.2	1	515.7	515.7	0.00329	0.005	1	5	0.0619	9	1	0	12	252	0	0	181.7	0	0	19	3592	8	19	808	819	12	12	0	read	NR_002936.2	9606	222699	TOB2P1	TOB2P|TOB4p|p373c6.3	transducer of ERBB2, 2 pseudogene 1	CRA_a protein	NR_002936.2	-	NC_000006.12	pseudo	VALIDATED	6	-	28215337	28218928	Reference GRCh38.p12 Primary Assembly
hsa-mir-411_20g	NM_152230.4	2	1222.3	621.8	3.72e-06	2.86e-05	1	2	0.00175	9	1	0	11	240	0	0	294.8	0	0	19	6133	8	18	5674	5684	11	11	0	read	NM_152230.4	9606	253430	IPMK	-	inositol polyphosphate multikinase	inositol polyphosphate multikinase|inositol 1,3,4,6-tetrakisphosphate 5-kinase	NM_152230.4	NP_689416.1	NC_000010.11	protein-coding	REVIEWED	10	-	58191516	58269960	Reference GRCh38.p12 Primary Assembly
hsa-mir-411_20g	NM_148894.2	2	1146.3	589	0.000619	0.00272	2	2	3.54e-10	6	1	0	19	244	28	0	190	0	0	19	10542	1	19	6763	6781	19	19	0	read	NM_148894.2	9606	259282	BOD1L1	BOD1L|FAM44A	biorientation of chromosomes in cell division 1 like 1	biorientation of chromosomes in cell division protein 1-like 1|biorientation of chromosomes in cell division 1-like|family with sequence similarity 44, member A	NM_148894.2	NP_683692.2	NC_000004.12	protein-coding	VALIDATED	4	-	13568737	13627720	Reference GRCh38.p12 Primary Assembly
hsa-mir-411_20g	NM_001135919.1	1	538.2	538.2	4.16e-05	0.000138	1	1	6.54e-06	5.5	1	0	18	252	8	0	179.2	0	0	19	2828	2	19	594	611	18	18	0	read	NM_001135919.1	9606	283537	SLC46A3	FKSG16	solute carrier family 46 member 3	solute carrier family 46 member 3	NM_001135919.1	NP_001129391.1	NC_000013.11	protein-coding	REVIEWED	13	-	28700079	28719012	Reference GRCh38.p12 Primary Assembly
hsa-mir-411_20g	NM_001353805.1	1	615.3	615.3	2.38e-05	0.000204	2	3	4.77e-07	8	1	0	14	240	0	0	248.3	0	0	19	2598	5	18	1824	1837	14	14	0	read	NM_001353805.1	9606	284325	C19orf54	-	chromosome 19 open reading frame 54	UPF0692 protein C19orf54	NM_001353805.1	NP_001340734.1	NC_000019.10	protein-coding	VALIDATED	19	-	40740855	40751371	Reference GRCh38.p12 Primary Assembly
hsa-mir-411_20g	NM_001329761.1	1	513.3	513.3	0.0318	0.0476	1	1	6.54e-06	11.5	1	0	8	244	0	0	191.3	0	0	19	2790	12	19	420	427	8	8	0	read	NM_001329761.1	9606	284459	HKR1	ZNF875	HKR1, GLI-Kruppel zinc finger family member	Krueppel-related zinc finger protein 1|oncogene HKR1|zinc finger protein 875	NM_001329761.1	NP_001316690.1	NC_000019.10	protein-coding	VALIDATED	19	+	37312836	37364454	Reference GRCh38.p12 Primary Assembly
hsa-mir-411_20g	NM_001012506.5	1	636.9	636.9	5.95e-13	3.69e-12	3	3	2.18e-14	8.5	1	0	15	244	0	0	234.9	0	0	19	3145	5	19	331	345	15	15	0	read	NM_001012506.5	9606	285331	CCDC66	-	coiled-coil domain containing 66	coiled-coil domain-containing protein 66	NM_001012506.5	NP_001012524.4	NC_000003.12	protein-coding	VALIDATED	3	+	56557124	56621836	Reference GRCh38.p12 Primary Assembly
hsa-mir-411_20g	NM_173829.3	1	662.8	662.8	3.38e-05	0.000687	1	1	6.54e-06	8	1	0	16	312	0	0	269.8	0	0	19	6856	4	19	1891	1906	16	16	0	read	NM_173829.3	9606	285672	SREK1IP1	P18SRP|SFRS12IP1	SREK1 interacting protein 1	protein SREK1IP1|SFRS12-interacting protein 1|p18 splicing regulatory protein|protein SFRS12IP1|splicing regulatory protein of 18 kDa	NM_173829.3	NP_776190.1	NC_000005.10	protein-coding	VALIDATED	5	-	64718147	64768838	Reference GRCh38.p12 Primary Assembly
hsa-mir-411_20g	NR_110506.1	2	1205.5	709	8.85e-05	0.00142	4	4	0	6.5	1	0	17	244	40	0	214	0	0	19	1159	3	19	171	187	17	17	0	read	NR_110506.1	9606	286480	UBE2E4P	UbcM2	ubiquitin conjugating enzyme E2 E4 pseudogene	ubiquitin conjugating enzyme E2E 4 pseudogene|ubiquitin-conjugating enzyme E2E 3 (UBC4/5 homolog, yeast) pseudogene|ubiquitin-conjugating enzyme UbcM2	NR_110506.1	-	NC_000023.11	pseudo	VALIDATED	X	+	14244264	14245422	Reference GRCh38.p12 Primary Assembly
hsa-mir-411_20g	NM_001134649.2	1	538	538	6.1e-09	1.38e-08	1	1	6.54e-06	5	1	1	19	244	16	0	201	0	0	19	6209	1	19	2240	2257	19	18	0	read	NM_001134649.2	9606	317649	EIF4E3	eIF-4E3|eIF4E-3	eukaryotic translation initiation factor 4E family member 3	eukaryotic translation initiation factor 4E type 3	NM_001134649.2	NP_001128121.1	NC_000003.12	protein-coding	VALIDATED	3	-	71679288	71754772	Reference GRCh38.p12 Primary Assembly
hsa-mir-411_20g	NM_001029863.2	1	650.9	650.9	4.56e-09	7.3e-08	4	4	0	8	1	0	17	152	12	0	287.9	0	0	19	4247	2	18	1840	1856	17	17	0	read	NM_001029863.2	9606	387263	C6orf120	-	chromosome 6 open reading frame 120	UPF0669 protein C6orf120	NM_001029863.2	NP_001025034.1	NC_000006.12	protein-coding	REVIEWED	6	+	169702111	169706357	Reference GRCh38.p12 Primary Assembly
hsa-mir-411_20g	NR_026656.1	1	632.1	632.1	9.97e-06	6.9e-05	2	9	0.00888	6.5	1	0	16	244	0	0	255.1	0	0	19	1411	4	19	1242	1257	16	16	0	read	NR_026656.1	9606	400043	LINC02381	-	long intergenic non-protein coding RNA 2381	-	NR_026656.1	-	NC_000012.12	ncRNA	PREDICTED	12	+	54126070	54132842	Reference GRCh38.p12 Primary Assembly
hsa-mir-411_20g	NR_027451.1	1	527.2	527.2	2.89e-06	5.38e-06	1	3	0.0122	7	1	1	16	244	0	0	202.2	0	0	19	5378	5	19	2240	2255	15	16	0	read	NR_027451.1	9606	647979	NORAD	LINC00657	non-coding RNA activated by DNA damage	long intergenic non-protein coding RNA 657	NR_027451.1	-	NC_000020.11	ncRNA	VALIDATED	20	-	36045617	36050959	Reference GRCh38.p12 Primary Assembly
hsa-mir-411_20g	NR_146393.1	1	585	585	3.67e-11	1.99e-10	1	1	6.54e-06	7.5	1	0	16	312	0	0	187	0	0	19	2729	4	19	484	499	16	16	0	read	NR_146393.1	9606	653381	SORD2P	SORD2	sorbitol dehydrogenase 2, pseudogene	SORD pseudogene	NR_146393.1	-	NC_000015.10	pseudo	VALIDATED	15	-	44825746	44884693	Reference GRCh38.p12 Primary Assembly
hsa-mir-411_20g	NR_027408.1	1	587.7	587.7	2.16e-11	1.08e-10	2	7	0.00211	10	1	0	12	244	0	0	228.7	0	0	19	1160	8	19	1139	1150	12	12	0	read	NR_027408.1	9606	653653	LOC653653	-	adaptor related protein complex 1 sigma 2 subunit pseudogene	-	NR_027408.1	-	NC_000017.11	pseudo	PROVISIONAL	17	-	60101759	60102918	Reference GRCh38.p12 Primary Assembly
hsa-mir-411_20g	NM_001085399.1	1	583	583	2.48e-07	2.29e-06	1	1	6.54e-06	8.5	1	0	13	312	0	0	187	0	0	19	1366	7	19	446	458	13	13	0	read	NM_001085399.1	9606	768211	RELL1	-	RELT like 1	RELT-like protein 1|receptor expressed in lymphoid tissues like 1|tmp_locus_29	NM_001085399.1	NP_001078868.1	NC_000004.12	protein-coding	VALIDATED	4	-	37590799	37686402	Reference GRCh38.p12 Primary Assembly
hsa-mir-411_20g	NR_029854.1	1	662.3	662.3	2.1e-06	0.000107	4	7	1.23e-10	9	1	0	14	244	0	0	222.3	0	0	19	87	6	19	39	52	14	14	0	read	NR_029854.1	9606	100126355	MIR365A	MIR365-1|MIRN365-1|hsa-mir-365a|mir-365a	microRNA 365a	hsa-mir-365-1|microRNA 365-1	NR_029854.1	-	NC_000016.10	ncRNA	PROVISIONAL	16	+	14309284	14309370	Reference GRCh38.p12 Primary Assembly
hsa-mir-411_20g	NM_001134493.1	1	715.2	715.2	1.56e-05	0.00106	6	47	0.00729	6	1	0	18	244	16	0	163.2	0	0	19	881	2	19	239	256	18	18	0	read	NM_001134493.1	9606	100188893	TOMM6	OBTP|TOM6	translocase of outer mitochondrial membrane 6	mitochondrial import receptor subunit TOM6 homolog|over-expressed breast tumor protein|overexpressed breast tumor protein|translocase of outer membrane 6 kDa subunit homolog|translocase of outer mitochondrial membrane 6 homolog	NM_001134493.1	NP_001127965.1	NC_000006.12	protein-coding	VALIDATED	6	+	41787442	41789895	Reference GRCh38.p12 Primary Assembly
hsa-mir-411_20g	NR_144516.1	1	592.6	592.6	0	0	3	3	2.18e-14	8.5	1	0	15	244	0	0	190.6	0	0	19	9110	5	19	7862	7876	15	15	0	read	NR_144516.1	9606	100996724	LOC100996724	-	phosphodiesterase 4D interacting protein-like	myomegalin-like	NR_144516.1	-	NC_000001.11	pseudo	VALIDATED	1	-	120469627	120665435	Reference GRCh38.p12 Primary Assembly
hsa-mir-411_20g	NR_110868.1	1	588.5	588.5	5.57e-05	0.00039	2	2	3.54e-10	7.5	1	0	18	244	16	0	212.5	0	0	19	709	2	19	598	615	18	18	0	read	NR_110868.1	9606	101929767	LOC101929767	-	uncharacterized LOC101929767	-	NR_110868.1	-	NC_000017.11	ncRNA	VALIDATED	17	-	43148365	43170402	Reference GRCh38.p12 Primary Assembly
hsa-mir-411_20g	NM_002473.5	1	1134	1134	8.2e-10	6.64e-08	16	28	0	8	1	0	15	244	0	0	207	0	0	19	7554	5	19	1984	1998	15	15	0	read	NM_002473.5	9606	4627	MYH9	BDPLT6|DFNA17|EPSTS|FTNS|MATINS|MHA|NMHC-II-A|NMMHC-IIA|NMMHCA	myosin heavy chain 9	myosin-9|cellular myosin heavy chain, type A|myosin, heavy chain 9, non-muscle|non-muscle myosin heavy chain 9|non-muscle myosin heavy chain A|non-muscle myosin heavy chain IIa|non-muscle myosin heavy polypeptide 9|nonmuscle myosin heavy chain II-A	NM_002473.5	NP_002464.1	NC_000022.11	protein-coding	REVIEWED	22	-	36281276	36388066	Reference GRCh38.p12 Primary Assembly
hsa-mir-411_20g	NM_020772.2	1	1141.6	1141.6	0	0	15	27	0	9.5	1	0	12	240	0	0	261.6	0	0	19	10897	7	18	9024	9035	12	12	0	read	NM_020772.2	9606	57532	NUFIP2	182-FIP|82-FIP|FIP-82|PIG1	NUFIP2, FMR1 interacting protein 2	nuclear fragile X mental retardation-interacting protein 2|82 kDa FMRP-interacting protein|82-kD FMRP Interacting Protein|FMRP-interacting protein 2|Fragile X Mental Retardation Protein|cell proliferation-inducing gene 1 protein|nuclear fragile X mental retardation protein interacting protein 2|proliferation-inducing gene 1	NM_020772.2	NP_065823.1	NC_000017.11	protein-coding	VALIDATED	17	-	29255835	29294147	Reference GRCh38.p12 Primary Assembly
hsa-mir-411_20g	NM_018362.3	1	933.5	933.5	1.2e-12	3.12e-11	10	16	0	11.5	1	0	8	244	0	0	251.5	0	0	19	4866	12	19	1801	1808	8	8	0	read	NM_018362.3	9606	55327	LIN7C	LIN-7-C|LIN-7C|MALS-3|MALS3|VELI3	lin-7 homolog C, crumbs cell polarity complex component	protein lin-7 homolog C|LIN-7 protein 3|mammalian lin-seven protein 3|veli-3|vertebrate lin-7 homolog 3	NM_018362.3	NP_060832.1	NC_000011.10	protein-coding	VALIDATED	11	-	27494417	27506778	Reference GRCh38.p12 Primary Assembly
hsa-mir-411_20g	NM_001290204.1	1	774	774	3.08e-05	0.000624	5	6	0	6	1	0	18	244	44	0	239	0	0	19	5913	2	19	4922	4939	18	18	0	read	NM_001290204.1	9606	55802	DCP1A	HSA275986|Nbla00360|SMAD4IP1|SMIF	decapping mRNA 1A	mRNA-decapping enzyme 1A|DCP1 decapping enzyme homolog A|DCP1 decapping enzyme-like protein A|Smad4-interacting transcriptional co-activator|decapping enzyme hDcp1a|putative protein product of Nbla00360|transcription factor SMIF	NM_001290204.1	NP_001277133.1	NC_000003.12	protein-coding	REVIEWED	3	-	53283422	53347626	Reference GRCh38.p12 Primary Assembly
hsa-mir-411_20g	NM_001127321.1	2	1127.1	654.7	0.000623	0.00515	3	3	2.18e-14	11.5	1	0	8	244	0	0	252.7	0	0	19	11525	12	19	4094	4101	8	8	0	read	NM_001127321.1	9606	23468	CBX5	HEL25|HP1|HP1A	chromobox 5	chromobox protein homolog 5|HP1 alpha homolog|HP1-ALPHA|HP1Hs alpha|antigen p25|chromobox homolog 5 (HP1 alpha homolog, Drosophila)|epididymis luminal protein 25|heterochromatin protein 1 homolog alpha|heterochromatin protein 1-alpha	NM_001127321.1	NP_001120793.1	NC_000012.12	protein-coding	REVIEWED	12	-	54230945	54280130	Reference GRCh38.p12 Primary Assembly
hsa-mir-411_20g	NM_001352680.1	1	592.4	592.4	0.000188	0.00102	3	3	2.18e-14	7	1	0	18	152	8	0	271.4	0	0	19	6759	1	18	1873	1890	18	18	0	read	NM_001352680.1	9606	129787	TMEM18	lncND	transmembrane protein 18	transmembrane protein 18	NM_001352680.1	NP_001339609.1	NC_000002.12	protein-coding	VALIDATED	2	-	663876	677467	Reference GRCh38.p12 Primary Assembly
hsa-mir-411_20g	NM_024640.3	2	738.6	603.8	0.000453	0.00272	3	3	2.18e-14	10.5	1	0	10	244	0	0	198.8	0	0	19	1871	10	19	903	912	10	10	0	read	NM_024640.3	9606	79693	YRDC	DRIP3|IRIP|SUA5	yrdC N6-threonylcarbamoyltransferase domain containing	yrdC domain-containing protein, mitochondrial|dopamine receptor interacting protein 3|hIRIP|ischemia/reperfusion inducible protein|ischemia/reperfusion-inducible protein homolog|yrdC N(6)-threonylcarbamoyltransferase domain containing|yrdC domain containing	NM_024640.3	NP_078916.3	NC_000001.11	protein-coding	VALIDATED	1	-	37802941	37808192	Reference GRCh38.p12 Primary Assembly
hsa-mir-411_20g	NM_001177591.1	1	681.7	681.7	3.79e-05	0.00106	2	2	3.54e-10	7	1	0	18	312	24	0	220.7	0	0	19	3677	2	19	2999	3016	18	18	0	read	NM_001177591.1	9606	5520	PPP2R2A	B55A|B55ALPHA|PR52A|PR55A|PR55alpha	protein phosphatase 2 regulatory subunit Balpha	serine/threonine-protein phosphatase 2A 55 kDa regulatory subunit B alpha isoform|protein phosphatase 2, regulatory subunit B, alpha	NM_001177591.1	NP_001171062.1	NC_000008.11	protein-coding	REVIEWED	8	+	26291490	26372679	Reference GRCh38.p12 Primary Assembly
hsa-mir-411_20g	NM_001278712.1	1	578	578	7.14e-05	0.000421	2	2	3.54e-10	7.5	1	0	13	252	0	0	195	0	0	19	3060	7	19	3007	3019	13	13	0	read	NM_001278712.1	9606	64422	ATG3	APG3|APG3-LIKE|APG3L|PC3-96	autophagy related 3	ubiquitin-like-conjugating enzyme ATG3|2610016C12Rik|APG3 autophagy 3-like|ATG3 autophagy related 3 homolog|autophagy-related protein 3|hApg3	NM_001278712.1	NP_001265641.1	NC_000003.12	protein-coding	REVIEWED	3	-	112532506	112561962	Reference GRCh38.p12 Primary Assembly
hsa-mir-411_20g	NM_001330347.1	1	118.6	118.6	0.321	0.321	2	2	3.54e-10	5	1	0	16	-68	-10	0	50.6	0	0	19	5172	1	16	751	766	16	16	12	read	NM_001330347.1	9606	4361	MRE11	ATLD|HNGS1|MRE11A|MRE11B	MRE11 homolog, double strand break repair nuclease	double-strand break repair protein MRE11|AT-like disease|DNA recombination and repair protein|MRE11 double strand break repair nuclease A|MRE11 homolog 1|MRE11 homolog A, double strand break repair nuclease|MRE11 homolog, double strand break repair nuclease A|MRE11 meiotic recombination 11 homolog A|MRE11 meiotic recombination 11-like protein A|double-strand break repair protein MRE11A|endo/exonu…	NM_001330347.1	NP_001317276.1	NC_000011.10	protein-coding	REVIEWED	11	-	94415569	94512700	Reference GRCh38.p12 Primary Assembly
hsa-mir-411_20g	NM_001018104.2	1	232.1	232.1	0.0622	0.0629	1	1	6.54e-06	4	1	0	18	32	52	0	37.1	0	0	19	1755	2	19	1061	1078	18	18	11	read	NM_001018104.2	9606	81889	FAHD1	C16orf36|YISKL	fumarylacetoacetate hydrolase domain containing 1	acylpyruvase FAHD1, mitochondrial|FAH domain-containing protein 1|OAA decarboxylase|YISK like/RJD15|acylpyruvate hydrolase|fumarylacetoacetate hydrolase domain-containing protein 1|oxaloacetate decarboxylase|yisK-like protein	NM_001018104.2	NP_001018114.1	NC_000016.10	protein-coding	VALIDATED	16	+	1827223	1840206	Reference GRCh38.p12 Primary Assembly
hsa-mir-411_20g	NM_001023563.3	1	581.7	581.7	0.0167	0.0476	1	1	6.54e-06	7.5	1	0	17	244	16	0	240.7	0	0	19	10126	3	19	6157	6173	17	17	0	read	NM_001023563.3	9606	390980	ZNF805	-	zinc finger protein 805	zinc finger protein 805|CTC-444N24.8	NM_001023563.3	NP_001018857.2	NC_000019.10	protein-coding	VALIDATED	19	+	57240684	57262737	Reference GRCh38.p12 Primary Assembly
hsa-mir-411_20g	NM_001039618.2	1	631.1	631.1	7.28e-05	0.000558	1	2	0.00175	6	1	0	18	240	12	0	291.1	0	0	19	7575	1	18	4408	4425	18	18	0	read	NM_001039618.2	9606	58487	CREBZF	SMILE|ZF	CREB/ATF bZIP transcription factor	CREB/ATF bZIP transcription factor|HCF-binding transcription factor Zhangfei|SHP-interacting leucine zipper protein|Zhangfei|host cell factor-binding transcription factor Zhangfei	NM_001039618.2	NP_001034707.1	NC_000011.10	protein-coding	VALIDATED	11	-	85657563	85665147	Reference GRCh38.p12 Primary Assembly
hsa-mir-411_20g	NM_001303468.1	1	553.3	553.3	2.27e-09	6.21e-09	1	1	6.54e-06	8.5	1	0	14	244	0	0	228.3	0	0	19	3907	6	19	943	956	14	14	0	read	NM_001303468.1	9606	8935	SKAP2	PRAP|RA70|SAPS|SCAP2|SKAP-HOM|SKAP55R	src kinase associated phosphoprotein 2	src kinase-associated phosphoprotein 2|Fyn-associated phosphoprotein SKAP55 homologue|Pyk2/RAFTK-associated protein|SKAP-55HOM|SKAP55 homolog|retinoic acid-induced protein 70|src family-associated phosphoprotein 2|src kinase-associated phosphoprotein of 55-related protein|src-associated adapter protein with PH and SH3 domains	NM_001303468.1	NP_001290397.1	NC_000007.14	protein-coding	REVIEWED	7	-	26654771	26864742	Reference GRCh38.p12 Primary Assembly
hsa-mir-411_20g	NM_001320808.1	2	1093.5	609.9	1.3e-07	1.09e-06	1	1	6.54e-06	6.5	1	0	18	244	12	0	268.9	0	0	19	8391	2	19	5181	5198	18	18	0	read	NM_001320808.1	9606	9926	LPGAT1	FAM34A|FAM34A1|NET8	lysophosphatidylglycerol acyltransferase 1	acyl-CoA:lysophosphatidylglycerol acyltransferase 1|family with sequence similarity 34, member A	NM_001320808.1	NP_001307737.1	NC_000001.11	protein-coding	VALIDATED	1	-	211743456	211830771	Reference GRCh38.p12 Primary Assembly
hsa-mir-411_20g	NM_001329674.1	1	555.6	555.6	0.000823	0.0029	1	1	6.54e-06	11.5	1	0	8	244	0	0	233.6	0	0	19	6128	12	19	4139	4146	8	8	0	read	NM_001329674.1	9606	55832	CAND1	TIP120|TIP120A	cullin associated and neddylation dissociated 1	cullin-associated NEDD8-dissociated protein 1|TBP-interacting protein of 120 kDa A|p120 CAND1	NM_001329674.1	NP_001316603.1	NC_000012.12	protein-coding	REVIEWED	12	+	67269280	67314691	Reference GRCh38.p12 Primary Assembly
hsa-mir-411_20g	NM_012329.2	1	572.2	572.2	1.52e-05	7.51e-05	1	1	6.54e-06	6.5	1	0	19	244	8	0	238.2	0	0	19	2723	1	19	1203	1221	19	19	0	read	NM_012329.2	9606	23531	MMD	MMA|MMD1|PAQR11	monocyte to macrophage differentiation associated	monocyte to macrophage differentiation factor|macrophage maturation-associated|monocyte to macrophage differentiation protein|progestin and adipoQ receptor family member 11|progestin and adipoQ receptor family member XI	NM_012329.2	NP_036461.2	NC_000017.11	protein-coding	REVIEWED	17	-	55392612	55421979	Reference GRCh38.p12 Primary Assembly
hsa-mir-497_25g	NM_001095.3	1	552.5	552.5	0.0376	0.069	2	2	3.54e-10	6.5	1	0	19	240	28	0	142.5	0	0	21	3873	2	20	2210	2228	19	19	0	read	NM_001095.3	9606	41	ASIC1	ACCN2|ASIC|BNaC2	acid sensing ion channel subunit 1	acid-sensing ion channel 1|Cation channel, amiloride-sensitive, neuronal, 2|acid sensing (proton gated) ion channel 1|acid-sensing ion channel 1a protein|amiloride-sensitive cation channel 2, neuronal|brain sodium channel 2	NM_001095.3	NP_001086.2	NC_000012.12	protein-coding	REVIEWED	12	+	50057636	50083621	Reference GRCh38.p12 Primary Assembly
hsa-mir-497_25g	NM_001199954.1	1	4311	4311	0	0	92	92	0	12	1	0	9	320	0	0	261	0	0	21	2123	13	21	2090	2098	9	9	0	read	NM_001199954.1	9606	71	ACTG1	ACT|ACTG|DFNA20|DFNA26|HEL-176	actin gamma 1	actin, cytoplasmic 2|cytoskeletal gamma-actin|epididymis luminal protein 176	NM_001199954.2	NP_001186883.1	NC_000017.11	protein-coding	REVIEWED	17	-	81509970	81512865	Reference GRCh38.p12 Primary Assembly
hsa-mir-497_25g	NM_001030007.1	1	110.4	110.4	0.327	0.352	1	1	6.54e-06	8	1	0	14	-32	-10	0	51.4	0	0	21	6850	4	17	6028	6041	14	14	11	read	NM_001030007.1	9606	164	AP1G1	ADTG|CLAPG1	adaptor related protein complex 1 subunit gamma 1	AP-1 complex subunit gamma-1|adapter-related protein complex 1 subunit gamma-1|adaptor protein complex AP-1 subunit gamma-1|adaptor related protein complex 1 gamma 1 subunit|clathrin assembly protein complex 1 gamma large chain|clathrin assembly protein complex 1 gamma-1 large chain|clathrin-associated/assembly/adaptor protein, large, gamma 1|gamma adaptin|gamma1-adaptin|golgi adaptor HA1/AP1 ada…	NM_001030007.1	NP_001025178.1	NC_000016.10	protein-coding	REVIEWED	16	-	71728999	71809072	Reference GRCh38.p12 Primary Assembly
hsa-mir-497_25g	NM_001353788.1	1	594.8	594.8	0.011	0.0569	2	2	3.54e-10	9	1	0	20	240	0	0	232.8	0	0	21	3955	1	20	1612	1631	20	20	0	read	NM_001353788.1	9606	321	APBA2	D15S1518E|HsT16821|LIN-10|MGC:14091|MINT2|X11-BETA|X11L	amyloid beta precursor protein binding family A member 2	amyloid-beta A4 precursor protein-binding family A member 2|X11-like protein|adapter protein X11beta|amyloid beta (A4) precursor protein-binding, family A, member 2 (X11-like)|mint-2|neuron-specific X11L protein|neuronal munc18-1-interacting protein 2|phosphotyrosine-binding/-interacting domain (PTB)-bearing protein	NM_001353788.1	NP_001340717.1	NC_000015.10	protein-coding	REVIEWED	15	+	28885478	29118314	Reference GRCh38.p12 Primary Assembly
hsa-mir-497_25g	NM_001256196.1	2	1267.3	715.8	0.000458	0.00414	3	3	2.18e-14	5.5	1	1	18	252	60	0	224.8	0	0	21	2571	4	21	1748	1764	18	17	0	read	NM_001256196.1	9606	369	ARAF	A-RAF|ARAF1|PKS2|RAFA1	A-Raf proto-oncogene, serine/threonine kinase	serine/threonine-protein kinase A-Raf|A-Raf proto-oncogene serine/threonine-protein kinase|Oncogene ARAF1|Ras-binding protein DA-Raf|proto-oncogene A-Raf-1|proto-oncogene Pks|v-raf murine sarcoma 3611 viral oncogene homolog 1|v-raf murine sarcoma 3611 viral oncogene-like protein	NM_001256196.1	NP_001243125.1	NC_000023.11	protein-coding	REVIEWED	X	+	47561099	47571920	Reference GRCh38.p12 Primary Assembly
hsa-mir-497_25g	NM_001178075.1	1	574	574	0.0193	0.0465	2	3	4.77e-07	6	1	1	21	240	12	0	197	0	0	21	2010	1	20	1390	1410	20	21	0	read	NM_001178075.1	9606	440	ASNS	ASNSD|TS11	asparagine synthetase (glutamine-hydrolyzing)	asparagine synthetase [glutamine-hydrolyzing]|TS11 cell cycle control protein|glutamine-dependent asparagine synthetase	NM_001178075.1	NP_001171546.1	NC_000007.14	protein-coding	REVIEWED	7	-	97852116	97928561	Reference GRCh38.p12 Primary Assembly
hsa-mir-497_25g	NM_000051.3	1	616.1	616.1	0.0178	0.0609	1	1	6.54e-06	12	1	0	10	312	0	0	219.1	0	0	21	13147	12	21	414	423	10	10	0	read	NM_000051.3	9606	472	ATM	AT1|ATA|ATC|ATD|ATDC|ATE|TEL1|TELO1	ATM serine/threonine kinase	serine-protein kinase ATM|A-T mutated|AT mutated|TEL1, telomere maintenance 1, homolog|ataxia telangiectasia mutated	NM_000051.3	NP_000042.3	NC_000011.10	protein-coding	REVIEWED	11	+	108222483	108369098	Reference GRCh38.p12 Primary Assembly
hsa-mir-497_25g	NM_000489.4	1	513.8	513.8	0.0597	0.076	1	1	6.54e-06	13	1	0	8	248	0	0	181.8	0	0	21	11238	13	20	2763	2770	8	8	0	read	NM_000489.4	9606	546	ATRX	JMS|MRX52|RAD54|RAD54L|XH2|XNP|ZNF-HX	ATRX, chromatin remodeler	transcriptional regulator ATRX|ATP-dependent helicase ATRX|X-linked helicase II|X-linked nuclear protein|alpha thalassemia/mental retardation syndrome X-linked (RAD54 homolog, S. cerevisiae)	NM_000489.5	NP_000480.3	NC_000023.11	protein-coding	REVIEWED	X	-	77504877	77786268	Reference GRCh38.p12 Primary Assembly
hsa-mir-497_25g	NM_004329.2	1	533.7	533.7	0.0444	0.0749	1	1	6.54e-06	13	1	0	9	240	0	0	214.7	0	0	21	3631	12	20	2700	2708	9	9	0	read	NM_004329.2	9606	657	BMPR1A	10q23del|ACVRLK3|ALK3|CD292|SKR5	bone morphogenetic protein receptor type 1A	bone morphogenetic protein receptor type-1A|ALK-3|BMP type-1A receptor|BMPR-1A|activin A receptor, type II-like kinase 3|activin receptor-like kinase 3|bone morphogenetic protein receptor, type IA|serine/threonine-protein kinase receptor R5	NM_004329.2	NP_004320.2	NC_000010.11	protein-coding	REVIEWED	10	+	86755785	86927968	Reference GRCh38.p12 Primary Assembly
hsa-mir-497_25g	NM_001211.5	2	418	536.7	0.00159	0.0178	1	1	6.54e-06	8.5	1	0	15	240	0	0	196.7	0	0	21	3749	6	20	3382	3396	15	15	0	read	NM_001211.5	9606	701	BUB1B	BUB1beta|BUBR1|Bub1A|MAD3L|MVA1|SSK1|hBUBR1	BUB1 mitotic checkpoint serine/threonine kinase B	mitotic checkpoint serine/threonine-protein kinase BUB1 beta|BUB1B, mitotic checkpoint serine/threonine kinase|MAD3/BUB1-related protein kinase|budding uninhibited by benzimidazoles 1 homolog beta|mitotic checkpoint kinase MAD3L	NM_001211.5	NP_001202.4	NC_000015.10	protein-coding	REVIEWED	15	+	40161008	40221135	Reference GRCh38.p12 Primary Assembly
hsa-mir-497_25g	NR_040016.1	1	531.4	531.4	0.00617	0.0238	1	1	6.54e-06	6.5	1	1	21	240	36	0	171.4	0	0	21	3127	1	20	2745	2765	20	21	0	read	NR_040016.1	9606	757	TMEM50B	C21orf4|HCVP7TP3	transmembrane protein 50B	transmembrane protein 50B|HCV p7-trans-regulated protein 3|HCV p7-transregulated protein 3	NR_040016.1	-	NC_000021.9	protein-coding	VALIDATED	21	-	33432485	33480008	Reference GRCh38.p12 Primary Assembly
hsa-mir-497_25g	NM_001224.4	1	1820.3	1820.3	0	0	33	36	0	10	1	0	15	240	0	0	212.3	0	0	21	4057	6	20	256	270	15	15	0	read	NM_001224.4	9606	835	CASP2	CASP-2|ICH1|NEDD-2|NEDD2|PPP1R57	caspase 2	caspase-2|caspase 2 apoptosis-related cysteine peptidase|neural precursor cell expressed developmentally down-regulated protein 2|protease ICH-1|protein phosphatase 1, regulatory subunit 57	NM_001224.4	NP_001215.1	NC_000007.14	protein-coding	REVIEWED	7	+	143288214	143307695	Reference GRCh38.p12 Primary Assembly
hsa-mir-497_25g	NM_000075.3	1	4881.9	4881.9	0	0	108	108	0	7	1	0	20	240	8	0	260.9	0	0	21	2020	1	20	1319	1338	20	20	0	read	NM_000075.3	9606	1019	CDK4	CMM3|PSK-J3	cyclin dependent kinase 4	cyclin-dependent kinase 4|cell division protein kinase 4	NM_000075.3	NP_000066.1	NC_000012.12	protein-coding	REVIEWED	12	-	57747726	57752446	Reference GRCh38.p12 Primary Assembly
hsa-mir-497_25g	NM_001282175.1	1	571.6	571.6	0.097	0.117	2	2	3.54e-10	8	1	0	20	240	8	0	190.6	0	0	21	2498	1	20	962	981	20	20	0	read	NM_001282175.1	9606	1209	CLPTM1	-	CLPTM1, transmembrane protein	cleft lip and palate transmembrane protein 1|cleft lip and palate associated transmembrane protein 1	NM_001282175.1	NP_001269104.1	NC_000019.10	protein-coding	VALIDATED	19	+	44954584	44993345	Reference GRCh38.p12 Primary Assembly
hsa-mir-497_25g	NM_000754.3	1	641.3	641.3	0.0737	0.0888	2	2	3.54e-10	7	1	0	21	312	0	0	196.3	0	0	21	2304	1	21	161	181	21	21	0	read	NM_000754.3	9606	1312	COMT	HEL-S-98n	catechol-O-methyltransferase	catechol O-methyltransferase|catechol-O-methyltransferase isoform|epididymis secretory sperm binding protein Li 98n|testicular tissue protein Li 42	NM_000754.3	NP_000745.1	NC_000022.11	protein-coding	REVIEWED	22	+	19941739	19969974	Reference GRCh38.p12 Primary Assembly
hsa-mir-497_25g	NM_001303.3	1	598.1	598.1	0.0081	0.0233	3	3	2.18e-14	9.5	1	0	14	248	0	0	176.1	0	0	21	3016	7	20	800	813	14	14	0	read	NM_001303.3	9606	1352	COX10	-	COX10, heme A:farnesyltransferase cytochrome c oxidase assembly factor	protoheme IX farnesyltransferase, mitochondrial|COX10 homolog, cytochrome c oxidase assembly protein, heme A: farnesyltransferase|cytochrome c oxidase assembly homolog 10|cytochrome c oxidase assembly protein|cytochrome c oxidase subunit X|heme A: farnesyltransferase|heme O synthase	NM_001303.3	NP_001294.2	NC_000017.11	protein-coding	REVIEWED	17	+	14069401	14208678	Reference GRCh38.p12 Primary Assembly
hsa-mir-497_25g	NM_001300965.1	1	685.2	685.2	0.00291	0.0197	2	2	3.54e-10	12	1	0	10	312	0	0	248.2	0	0	21	915	12	21	458	467	10	10	0	read	NM_001300965.1	9606	1466	CSRP2	CRP2|LMO5|SmLIM	cysteine and glycine rich protein 2	cysteine and glycine-rich protein 2|LIM domain only 5, smooth muscle|LIM domain only protein 5|LMO-5|cysteine-rich protein 2|smooth muscle cell LIM protein	NM_001300965.1	NP_001287894.1	NC_000012.12	protein-coding	REVIEWED	12	-	76858714	76879039	Reference GRCh38.p12 Primary Assembly
hsa-mir-497_25g	NM_004388.2	1	651.3	651.3	0.0014	0.0102	1	1	6.54e-06	4.5	1	0	20	248	36	0	254.3	0	0	21	3152	1	20	2341	2360	20	20	0	read	NM_004388.2	9606	1486	CTBS	CTB	chitobiase	di-N-acetylchitobiase|chitobiase, di-N-acetyl-	NM_004388.2	NP_004379.1	NC_000001.11	protein-coding	VALIDATED	1	-	84553120	84574479	Reference GRCh38.p12 Primary Assembly
hsa-mir-497_25g	NM_001199739.1	1	536.2	536.2	0.00919	0.0321	1	1	6.54e-06	7.5	1	0	20	248	12	0	186.2	0	0	21	3957	1	20	758	777	20	20	0	read	NM_001199739.1	9606	1520	CTSS	-	cathepsin S	cathepsin S	NM_001199739.1	NP_001186668.1	NC_000001.11	protein-coding	REVIEWED	1	-	150730195	150765956	Reference GRCh38.p12 Primary Assembly
hsa-mir-497_25g	NM_001293312.1	1	580.5	580.5	0.000421	0.00553	1	1	6.54e-06	12	1	0	11	240	0	0	260.5	0	0	21	3113	10	20	466	476	11	11	0	read	NM_001293312.1	9606	1615	DARS	HBSL|aspRS	aspartyl-tRNA synthetase	aspartate--tRNA ligase, cytoplasmic|aspartate tRNA ligase 1, cytoplasmic|aspartyl-tRNA synthetase, cytoplasmic|cell proliferation-inducing gene 40 protein|testicular tissue protein Li 192	NM_001293312.1	NP_001280241.1	NC_000002.12	protein-coding	REVIEWED	2	-	135905880	135985683	Reference GRCh38.p12 Primary Assembly
hsa-mir-497_25g	NM_001320595.1	1	596.8	596.8	0.0249	0.0585	3	3	2.18e-14	8	1	0	18	160	8	0	251.8	0	0	21	3941	3	20	565	582	18	18	0	read	NM_001320595.1	9606	1655	DDX5	G17P1|HLR1|HUMP68|p68	DEAD-box helicase 5	probable ATP-dependent RNA helicase DDX5|ATP-dependent RNA helicase DDX5|DEAD (Asp-Glu-Ala-Asp) box helicase 5|DEAD (Asp-Glu-Ala-Asp) box polypeptide 5|DEAD box protein 5|DEAD box-5|DEAD/H (Asp-Glu-Ala-Asp/His) box polypeptide 5 (RNA helicase, 68kD)|RNA helicase p68	NM_001320595.1	NP_001307524.1	NC_000017.11	protein-coding	REVIEWED	17	-	64498253	64507037	Reference GRCh38.p12 Primary Assembly
hsa-mir-497_25g	NM_001257144.1	1	237.8	237.8	0.215	0.25	2	3	4.77e-07	5	1	0	20	64	-32	0	55.8	0	0	21	3823	2	21	3778	3797	20	20	11	read	NM_001257144.1	9606	1663	DDX11	CHL1|CHLR1|KRG2|WABS	DEAD/H-box helicase 11	ATP-dependent DNA helicase DDX11|CHL1-like helicase homolog|CHL1-related helicase gene-1|CHL1-related protein 1|DEAD/H (Asp-Glu-Ala-Asp/His) box helicase 11|DEAD/H (Asp-Glu-Ala-Asp/His) box polypeptide 11 (CHL1-like helicase homolog, S. cerevisiae)|DEAD/H box protein 11|KRG-2|hCHLR1|keratinocyte growth factor-regulated gene 2 protein|probable ATP-dependent DNA helicase DDX11|probable ATP-dependen…	NM_001257144.1	NP_001244073.1	NC_000012.12	protein-coding	REVIEWED	12	+	31073844	31104798	Reference GRCh38.p12 Primary Assembly
hsa-mir-497_25g	NM_001079812.2	1	767.7	767.7	4.51e-05	0.00182	6	6	0	9	1	0	18	240	4	0	233.7	0	0	21	5777	3	20	4187	4204	18	18	0	read	NM_001079812.2	9606	1729	DIAPH1	DFNA1|DIA1|DRF1|LFHL1|SCBMS|hDIA1	diaphanous related formin 1	protein diaphanous homolog 1	NM_001079812.2	NP_001073280.1	NC_000005.10	protein-coding	REVIEWED	5	-	141515015	141619054	Reference GRCh38.p12 Primary Assembly
hsa-mir-497_25g	NM_001098424.1	1	677.3	677.3	0.00269	0.0307	3	3	2.18e-14	8	1	1	17	152	60	0	306.3	0	0	21	4968	4	20	3824	3839	17	16	0	read	NM_001098424.1	9606	1739	DLG1	DLGH1|SAP-97|SAP97|dJ1061C18.1.1|hdlg	discs large MAGUK scaffold protein 1	disks large homolog 1|discs large homolog 1, scribble cell polarity complex component|discs, large homolog 1 transcript variant 6-v1|discs, large homolog 1 transcript variant 6-v2|presynaptic protein SAP97|synapse-associated protein 97	NM_001098424.1	NP_001091894.1	NC_000003.12	protein-coding	REVIEWED	3	-	197042559	197299271	Reference GRCh38.p12 Primary Assembly
hsa-mir-497_25g	NM_001271785.1	1	534.8	534.8	0.00723	0.0235	1	1	6.54e-06	11.5	1	0	13	152	0	0	301.8	0	0	21	4397	8	20	2933	2945	13	13	0	read	NM_001271785.1	9606	1781	DYNC1I2	DIC74|DNCI2|IC2	dynein cytoplasmic 1 intermediate chain 2	cytoplasmic dynein 1 intermediate chain 2|DH IC-2|dynein intermediate chain 2, cytosolic|dynein, cytoplasmic, intermediate polypeptide 2|testis tissue sperm-binding protein Li 66n	NM_001271785.1	NP_001258714.1	NC_000002.12	protein-coding	REVIEWED	2	+	171687408	171750157	Reference GRCh38.p12 Primary Assembly
hsa-mir-497_25g	NM_004090.3	1	581.6	581.6	0.00432	0.0184	2	2	3.54e-10	13	1	0	9	252	0	0	206.6	0	0	21	4139	13	21	387	395	9	9	0	read	NM_004090.3	9606	1845	DUSP3	VHR	dual specificity phosphatase 3	dual specificity protein phosphatase 3|dual specificity protein phosphatase VHR|serine/threonine specific protein phosphatase|vaccinia H1-related phosphatase|vaccinia virus phosphatase VH1-related	NM_004090.3	NP_004081.1	NC_000017.11	protein-coding	REVIEWED	17	-	43766120	43778999	Reference GRCh38.p12 Primary Assembly
hsa-mir-497_25g	NM_001398.2	2	1291.5	765.1	2.41e-07	1.1e-05	5	9	1.71e-12	6.5	1	0	20	312	12	0	178.1	0	0	21	1276	2	21	565	584	20	20	0	read	NM_001398.2	9606	1891	ECH1	HPXEL	enoyl-CoA hydratase 1	delta(3,5)-Delta(2,4)-dienoyl-CoA isomerase, mitochondrial|delta3,5-delta2,4-dienoyl-CoA isomerase|delta3,5-delta2,4-dienoyl-coenzyme A isomerase|dienoyl-CoA isomerase|enoyl Coenzyme A hydratase 1, peroxisomal|enoyl-CoA hydratase 1, peroxisomal|peroxisomal enoyl-CoA hydratase 1	NM_001398.2	NP_001389.2	NC_000019.10	protein-coding	REVIEWED	19	-	38815421	38831856	Reference GRCh38.p12 Primary Assembly
hsa-mir-497_25g	NM_004092.3	1	539.3	539.3	0.0123	0.0293	1	9	0.2	7	1	0	18	240	12	0	184.3	0	0	21	1350	3	20	1270	1287	18	18	0	read	NM_004092.3	9606	1892	ECHS1	ECHS1D|SCEH	enoyl-CoA hydratase, short chain 1	enoyl-CoA hydratase, mitochondrial|enoyl Coenzyme A hydratase, short chain, 1, mitochondrial|enoyl-CoA hydratase, short chain, 1, mitochondrial|short chain enoyl-CoA hydratase	NM_004092.3	NP_004083.3	NC_000010.11	protein-coding	REVIEWED	10	-	133362479	133373403	Reference GRCh38.p12 Primary Assembly
hsa-mir-497_25g	NM_001346899.1	2	869.3	615.8	0.00563	0.0312	2	2	3.54e-10	6	1	0	19	240	20	0	208.8	0	0	21	6234	2	20	4514	4532	19	19	0	read	NM_001346899.1	9606	1956	EGFR	ERBB|ERBB1|HER1|NISBD2|PIG61|mENA	epidermal growth factor receptor	epidermal growth factor receptor|avian erythroblastic leukemia viral (v-erb-b) oncogene homolog|cell growth inhibiting protein 40|cell proliferation-inducing protein 61|epidermal growth factor receptor tyrosine kinase domain|erb-b2 receptor tyrosine kinase 1|proto-oncogene c-ErbB-1|receptor tyrosine-protein kinase erbB-1	NM_001346899.1	NP_001333828.1	NC_000007.14	protein-coding	REVIEWED	7	+	55019020	55208079	Reference GRCh38.p12 Primary Assembly
hsa-mir-497_25g	NM_001042559.2	1	788.1	788.1	7.45e-05	0.00285	7	7	0	9.5	1	0	18	240	4	0	221.1	0	0	21	3797	3	20	3311	3328	18	18	0	read	NM_001042559.2	9606	1982	EIF4G2	AAG1|DAP5|NAT1|P97	eukaryotic translation initiation factor 4 gamma 2	eukaryotic translation initiation factor 4 gamma 2|DAP-5|aging-associated protein 1|death-associated protein 5|eIF-4-gamma 2|eIF-4G 2|eIF4G 2|eukaryotic translation initiation factor 4G-like 1	NM_001042559.2	NP_001036024.3	NC_000011.10	protein-coding	REVIEWED	11	-	10797045	10809034	Reference GRCh38.p12 Primary Assembly
hsa-mir-497_25g	NM_001163285.1	1	559.9	559.9	0.0493	0.0668	1	1	6.54e-06	7	1	1	21	252	16	0	210.9	0	0	21	2676	1	21	1585	1604	21	20	0	read	NM_001163285.1	9606	2130	EWSR1	EWS|EWS-FLI1|bK984G1.4	EWS RNA binding protein 1	RNA-binding protein EWS|EWS RNA-binding protein variant 6|Ewing sarcoma breakpoint region 1|Ewings sarcoma EWS-Fli1 (type 1) oncogene	NM_001163285.1	NP_001156757.1	NC_000022.11	protein-coding	REVIEWED	22	+	29268008	29300524	Reference GRCh38.p12 Primary Assembly
hsa-mir-497_25g	NM_000401.3	1	1475.5	1475.5	1.16e-11	1.67e-09	24	26	0	13	1	0	9	240	0	0	236.5	0	0	21	3469	12	20	1416	1424	9	9	0	read	NM_000401.3	9606	2132	EXT2	SOTV|SSMS	exostosin glycosyltransferase 2	exostosin-2|N-acetylglucosaminyl-proteoglycan 4-beta-glucuronosyltransferase|glucuronosyl-N-acetylglucosaminyl-proteoglycan/N-acetylglucosaminyl-proteoglycan 4-alpha-N-acetylglucosaminyltransferase|multiple exostoses protein 2|multiple exostosis 2|putative tumor suppressor protein EXT2	NM_000401.3	NP_000392.3	NC_000011.10	protein-coding	REVIEWED	11	+	44095548	44245429	Reference GRCh38.p12 Primary Assembly
hsa-mir-497_25g	NM_000135.3	1	529	529	0.121	0.143	1	1	6.54e-06	12	1	0	9	248	0	0	193	0	0	21	5481	12	20	684	692	9	9	0	read	NM_000135.3	9606	2175	FANCA	FA|FA-H|FA1|FAA|FACA|FAH|FANCH	FA complementation group A	Fanconi anemia group A protein|Fanconi anemia complementation group A|Fanconi anemia, complementation group H|Fanconi anemia, type 1	NM_000135.3	NP_000126.2	NC_000016.10	protein-coding	REVIEWED	16	-	89737548	89816657	Reference GRCh38.p12 Primary Assembly
hsa-mir-497_25g	NM_004109.4	1	513.7	513.7	0.0229	0.0437	1	1	6.54e-06	3.5	1	1	21	160	28	0	218.7	0	0	21	3155	1	20	621	641	20	21	0	read	NM_004109.4	9606	2230	FDX1	ADX|FDX|LOH11CR1D	ferredoxin 1	adrenodoxin, mitochondrial|adrenal ferredoxin|hepatoredoxin|mitochondrial adrenodoxin	NM_004109.4	NP_004100.1	NC_000011.10	protein-coding	REVIEWED	11	+	110429936	110464883	Reference GRCh38.p12 Primary Assembly
hsa-mir-497_25g	NM_001455.3	2	1003.1	527.9	0.00978	0.0423	1	1	6.54e-06	13	1	0	9	240	0	0	208.9	0	0	21	7341	12	20	1898	1906	9	9	0	read	NM_001455.3	9606	2309	FOXO3	AF6q21|FKHRL1|FKHRL1P2|FOXO2|FOXO3A	forkhead box O3	forkhead box protein O3|forkhead box O3A|forkhead homolog (rhabdomyosarcoma) like 1|forkhead in rhabdomyosarcoma-like 1|forkhead, Drosophila, homolog of, in rhabdomyosarcoma-like 1	NM_001455.3	NP_001446.1	NC_000006.12	protein-coding	REVIEWED	6	+	108559822	108684768	Reference GRCh38.p12 Primary Assembly
hsa-mir-497_25g	NR_026718.1	1	525.4	525.4	0.00275	0.00904	1	1	6.54e-06	13	1	0	9	240	0	0	206.4	0	0	21	7259	12	20	1811	1819	9	9	0	read	NR_026718.1	9606	2310	FOXO3B	FKHRL1P1|ZNF286C	forkhead box O3B pseudogene	forkhead homolog (rhabdomyosarcoma) like 1 pseudogene 1|forkhead homolog (rhabdomyosarcoma) pseudogene|forkhead(Drosophila) homolog (rhabdomyosarcoma) 1 like pseudogene 1	NR_026718.1	-	NC_000017.11	pseudo	PROVISIONAL	17	-	18665922	18673180	Reference GRCh38.p12 Primary Assembly
hsa-mir-497_25g	NM_001164277.1	1	529.8	529.8	0.0177	0.0516	1	1	6.54e-06	10	1	0	16	240	0	0	206.8	0	0	21	2621	5	20	1057	1072	16	16	0	read	NM_001164277.1	9606	2542	SLC37A4	G6PT1|G6PT2|G6PT3|GSD1b|GSD1c|GSD1d|PRO0685|TRG-19|TRG19	solute carrier family 37 member 4	glucose-6-phosphate exchanger SLC37A4|glucose-5-phosphate transporter|glucose-6-phosphatase, transport (glucose) protein 3|glucose-6-phosphatase, transport (glucose-6-phosphate) protein 1|glucose-6-phosphatase, transport (phosphate/pyrophosphate) protein 2|glucose-6-phosphate translocase|microsomal glucose-6-phosphate transporter|solute carrier family 37 (glucose-6-phosphate transporter), member …	NM_001164277.1	NP_001157749.1	NC_000011.10	protein-coding	REVIEWED	11	-	119024350	119030905	Reference GRCh38.p12 Primary Assembly
hsa-mir-497_25g	NM_001320910.1	1	556.7	556.7	0.005	0.0129	2	2	3.54e-10	6.5	1	1	20	152	28	0	253.7	0	0	21	3097	1	20	1138	1156	20	19	0	read	NM_001320910.1	9606	2553	GABPB1	BABPB2|E4TF1|E4TF1-47|E4TF1-53|E4TF1B|GABPB|GABPB-1|GABPB2|NRF2B1|NRF2B2	GA binding protein transcription factor subunit beta 1	GA-binding protein subunit beta-1|GA binding protein transcription factor beta subunit 1 transcript variant gamma-2|GABP subunit beta-2|nuclear respiratory factor 2|transcription factor E4TF1-47|transcription factor E4TF1-53	NM_001320910.1	NP_001307839.1	NC_000015.10	protein-coding	REVIEWED	15	-	50277191	50359305	Reference GRCh38.p12 Primary Assembly
hsa-mir-497_25g	NM_002076.3	1	522.8	522.8	0.0102	0.0258	1	1	6.54e-06	12	1	0	11	240	0	0	200.8	0	0	21	5144	10	20	4188	4198	11	11	0	read	NM_002076.3	9606	2799	GNS	G6S	glucosamine (N-acetyl)-6-sulfatase	N-acetylglucosamine-6-sulfatase|glucosamine -6-sulfatase	NM_002076.3	NP_002067.1	NC_000012.12	protein-coding	REVIEWED	12	-	64713441	64759445	Reference GRCh38.p12 Primary Assembly
hsa-mir-497_25g	NM_000175.4	1	567	567	0.0103	0.04	2	5	0.000165	10.5	1	0	14	240	0	0	200	0	0	21	4219	7	20	1153	1166	14	14	0	read	NM_000175.4	9606	2821	GPI	AMF|GNPI|NLK|PGI|PHI|SA-36|SA36	glucose-6-phosphate isomerase	glucose-6-phosphate isomerase|autocrine motility factor|hexose monophosphate isomerase|hexosephosphate isomerase|neuroleukin|oxoisomerase|phosphoglucose isomerase|phosphohexomutase|phosphohexose isomerase|phosphosaccharomutase|sperm antigen-36	NM_000175.5	NP_000166.2	NC_000019.10	protein-coding	REVIEWED	19	+	34353329	34402412	Reference GRCh38.p12 Primary Assembly
hsa-mir-497_25g	NM_004491.4	1	615.8	615.8	0.00563	0.0312	1	1	6.54e-06	13	1	0	8	312	0	0	219.8	0	0	21	8904	14	21	2868	2875	8	8	0	read	NM_004491.4	9606	2909	ARHGAP35	GRF-1|GRLF1|P190-A|P190A|p190ARhoGAP|p190RhoGAP	Rho GTPase activating protein 35	rho GTPase-activating protein 35|glucocorticoid receptor DNA-binding factor 1|glucocorticoid receptor repression factor 1|rho GAP p190A	NM_004491.4	NP_004482.4	NC_000019.10	protein-coding	REVIEWED	19	+	46918566	47005076	Reference GRCh38.p12 Primary Assembly
hsa-mir-497_25g	NM_001130006.1	1	566.4	566.4	0.107	0.126	2	2	3.54e-10	7.5	1	1	20	160	40	0	248.4	0	0	21	7166	1	20	1555	1573	20	19	0	read	NM_001130006.1	9606	2935	GSPT1	551G9.2|ETF3A|GST1|eRF3a	G1 to S phase transition 1	eukaryotic peptide chain release factor GTP-binding subunit ERF3A|G1 to S phase transition protein 1 homolog|eukaryotic peptide chain release factor subunit 3a|eukaryotic release factor 3a	NM_001130006.1	NP_001123478.1	NC_000016.10	protein-coding	VALIDATED	16	-	11868127	11916661	Reference GRCh38.p12 Primary Assembly
hsa-mir-497_25g	NM_001301228.1	1	550.4	550.4	0.0214	0.0353	1	1	6.54e-06	8	1	0	18	240	16	0	202.4	0	0	21	3676	3	20	1397	1414	18	18	0	read	NM_001301228.1	9606	3149	HMGB3	HMG-2a|HMG-4|HMG2A|HMG4	high mobility group box 3	high mobility group protein B3|high mobility group protein 2a|high-mobility group (nonhistone chromosomal) protein 4	NM_001301228.1	NP_001288157.1	NC_000023.11	protein-coding	REVIEWED	X	+	150980507	150990774	Reference GRCh38.p12 Primary Assembly
hsa-mir-497_25g	NM_001098272.2	1	1044.2	1044.2	2.07e-06	0.000143	14	22	0	8	1	0	21	312	4	0	121.2	0	0	21	5450	1	21	123	143	21	21	0	read	NM_001098272.2	9606	3157	HMGCS1	HMGCS	3-hydroxy-3-methylglutaryl-CoA synthase 1	hydroxymethylglutaryl-CoA synthase, cytoplasmic|3-hydroxy-3-methylglutaryl coenzyme A (HMG-CoA) synthase|3-hydroxy-3-methylglutaryl-CoA synthase 1 (soluble)|3-hydroxy-3-methylglutaryl-Coenzyme A synthase 1 (soluble)	NM_001098272.2	NP_001091742.1	NC_000005.10	protein-coding	VALIDATED	5	-	43287469	43313511	Reference GRCh38.p12 Primary Assembly
hsa-mir-497_25g	NM_002137.3	1	706.8	706.8	0.00103	0.0175	5	5	0	8	1	0	17	240	12	0	201.8	0	0	21	3666	4	20	2494	2510	17	17	0	read	NM_002137.3	9606	3181	HNRNPA2B1	HNRNPA2|HNRNPB1|HNRPA2|HNRPA2B1|HNRPB1|IBMPFD2|RNPA2|SNRPB1	heterogeneous nuclear ribonucleoprotein A2/B1	heterogeneous nuclear ribonucleoproteins A2/B1|HNRNPA2B1/MYC fusion|hnRNP A2 / hnRNP B1|nuclear ribonucleoprotein particle A2 protein	NM_002137.3	NP_002128.1	NC_000007.14	protein-coding	REVIEWED	7	-	26189919	26200792	Reference GRCh38.p12 Primary Assembly
hsa-mir-497_25g	NM_001322434.1	1	4368.2	4368.2	0	0	96	117	0	12	1	0	9	248	0	0	232.2	0	0	21	2431	12	20	1550	1558	9	9	0	read	NM_001322434.1	9606	3189	HNRNPH3	2H9|HNRPH3	heterogeneous nuclear ribonucleoprotein H3	heterogeneous nuclear ribonucleoprotein H3|heterogeneous nuclear ribonucleoprotein 2H9|hnRNP 2H9|hnRNP H3	NM_001322434.1	NP_001309363.1	NC_000010.11	protein-coding	REVIEWED	10	+	68331692	68343195	Reference GRCh38.p12 Primary Assembly
hsa-mir-497_25g	NM_001005335.1	1	3176.1	3176.1	0	0	66	66	0	12	1	0	9	248	0	0	240.1	0	0	21	1895	12	20	1822	1830	9	9	0	read	NM_001005335.1	9606	3191	HNRNPL	HNRPL|P/OKcl.14|hnRNP-L	heterogeneous nuclear ribonucleoprotein L	heterogeneous nuclear ribonucleoprotein L|hnRNP L	NM_001005335.1	NP_001005335.1	NC_000019.10	protein-coding	REVIEWED	19	-	38836377	38852338	Reference GRCh38.p12 Primary Assembly
hsa-mir-497_25g	NM_004501.3	1	911.3	911.3	0.000556	0.00744	10	10	0	12	1	0	11	240	0	0	229.3	0	0	21	6789	10	20	1864	1874	11	11	0	read	NM_004501.3	9606	3192	HNRNPU	EIEE54|GRIP120|HNRNPU-AS1|HNRPU|SAF-A|SAFA|U21.1|hnRNP U|pp120	heterogeneous nuclear ribonucleoprotein U	heterogeneous nuclear ribonucleoprotein U|HNRNPU antisense RNA 1|heterogeneous nuclear ribonucleoprotein U (scaffold attachment factor A)|nuclear p120 ribonucleoprotein|p120 nuclear protein	NM_004501.3	NP_004492.2	NC_000001.11	protein-coding	REVIEWED	1	-	244850299	244864524	Reference GRCh38.p12 Primary Assembly
hsa-mir-497_25g	NM_000523.3	1	2132.8	2132.8	0	0	41	61	0	11	1	0	13	240	0	0	209.8	0	0	21	2341	8	20	1277	1289	13	13	0	read	NM_000523.3	9606	3239	HOXD13	BDE|BDSD|HOX4I|SPD|SPD1	homeobox D13	homeobox protein Hox-D13|homeo box 4I|homeo box D13|homeobox protein Hox-4I	NM_000523.3	NP_000514.2	NC_000002.12	protein-coding	REVIEWED	2	+	176087486	176095937	Reference GRCh38.p12 Primary Assembly
hsa-mir-497_25g	NM_001289125.1	1	1970	1970	0	0	36	36	0	9	1	0	19	240	12	0	233	0	0	21	2966	2	20	2010	2028	19	19	0	read	NM_001289125.1	9606	3455	IFNAR2	IFN-R|IFN-alpha-REC|IFNABR|IFNARB|IMD45	interferon alpha and beta receptor subunit 2	interferon alpha/beta receptor 2|IFN-R-2|IFN-alpha/beta receptor 2|human interferon alpha/beta receptor|interferon (alpha, beta and omega) receptor 2|interferon alpha binding protein|interferon receptor|interferon-alpha/beta receptor beta chain|type I interferon receptor 2	NM_001289125.1	NP_001276054.1	NC_000021.9	protein-coding	REVIEWED	21	+	33229894	33264512	Reference GRCh38.p12 Primary Assembly
hsa-mir-497_25g	NM_000597.2	1	561.1	561.1	0.0116	0.0349	1	1	6.54e-06	8	1	0	18	312	16	0	138.1	0	0	21	1439	4	21	112	129	18	18	0	read	NM_000597.2	9606	3485	IGFBP2	IBP2|IGF-BP53	insulin like growth factor binding protein 2	insulin-like growth factor-binding protein 2|IGF-binding protein 2|insulin-like growth factor binding protein 2, 36kDa	NM_000597.2	NP_000588.2	NC_000002.12	protein-coding	REVIEWED	2	+	216632827	216664435	Reference GRCh38.p12 Primary Assembly
hsa-mir-497_25g	NM_002205.4	1	515.9	515.9	0.0168	0.0413	1	1	6.54e-06	5	1	1	21	240	16	0	163.9	0	0	21	4267	1	20	4114	4134	20	21	0	read	NM_002205.4	9606	3678	ITGA5	CD49e|FNRA|VLA-5|VLA5A	integrin subunit alpha 5	integrin alpha-5|CD49 antigen-like family member E|ITGA5/SLC9B1 fusion|fibronectin receptor subunit alpha|fibronectin receptor, alpha polypeptide|fibronectin receptor, alpha subunit|integrin alpha-F|integrin, alpha 5 (fibronectin receptor, alpha polypeptide)|very late activation protein 5, alpha subunit	NM_002205.4	NP_002196.4	NC_000012.12	protein-coding	REVIEWED	12	-	54395260	54419265	Reference GRCh38.p12 Primary Assembly
hsa-mir-497_25g	NM_004523.3	1	589.9	589.9	0.000988	0.00799	2	2	3.54e-10	6.5	1	0	20	240	24	0	188.9	0	0	21	5101	1	20	1777	1796	20	20	0	read	NM_004523.3	9606	3832	KIF11	EG5|HKSP|KNSL1|MCLMR|TRIP5	kinesin family member 11	kinesin-like protein KIF11|TR-interacting protein 5|TRIP-5|kinesin-like protein 1|kinesin-like spindle protein HKSP|kinesin-related motor protein Eg5|thyroid receptor-interacting protein 5	NM_004523.3	NP_004514.2	NC_000010.11	protein-coding	REVIEWED	10	+	92593067	92655394	Reference GRCh38.p12 Primary Assembly
hsa-mir-497_25g	NM_001256269.1	1	6359.8	6359.8	0	0	147	147	0	8	1	0	19	240	16	0	172.8	0	0	21	2208	2	20	1167	1185	19	19	0	read	NM_001256269.1	9606	3835	KIF22	A-328A3.2|KID|KNSL4|OBP|OBP-1|OBP-2|SEMDJL2	kinesin family member 22	kinesin-like protein KIF22|kinesin-like DNA-binding protein pseudogene|kinesin-like protein 4|oriP binding protein|origin of plasmid DNA replication-binding protein	NM_001256269.1	NP_001243198.1	NC_000016.10	protein-coding	REVIEWED	16	+	29790712	29805542	Reference GRCh38.p12 Primary Assembly
hsa-mir-497_25g	NM_002268.4	2	1045.5	549.9	0.00736	0.0238	1	1	6.54e-06	10.5	1	0	12	248	0	0	208.9	0	0	21	8981	9	20	8224	8235	12	12	0	read	NM_002268.4	9606	3840	KPNA4	IPOA3|QIP1|SRP3	karyopherin subunit alpha 4	importin subunit alpha-3|importin alpha Q1|importin subunit alpha-4|karyopherin alpha 4 (importin alpha 3)	NM_002268.4	NP_002259.1	NC_000003.12	protein-coding	REVIEWED	3	-	160494994	160565587	Reference GRCh38.p12 Primary Assembly
hsa-mir-497_25g	NM_005560.4	3	1614.2	668.7	0.00263	0.026	4	4	0	6	1	1	21	252	16	0	191.7	0	0	21	11445	1	21	2528	2547	21	20	0	read	NM_005560.4	9606	3911	LAMA5	-	laminin subunit alpha 5	laminin subunit alpha-5|laminin alpha-5 chain|laminin-10 subunit alpha|laminin-11 subunit alpha|laminin-15 subunit alpha	NM_005560.4	NP_005551.3	NC_000020.11	protein-coding	REVIEWED	20	-	62309059	62367317	Reference GRCh38.p12 Primary Assembly
hsa-mir-497_25g	NM_001145454.2	1	605.2	605.2	0.000323	0.0036	3	3	2.18e-14	9	1	0	18	152	40	0	246.2	0	0	21	2251	3	20	513	530	18	18	0	read	NM_001145454.2	9606	3925	STMN1	C1orf215|LAP18|Lag|OP18|PP17|PP19|PR22|SMN	stathmin 1	stathmin|leukemia-associated phosphoprotein p18|metablastin|oncoprotein 18|phosphoprotein 19|phosphoprotein p19|prosolin|stathmin 1/oncoprotein 18|testicular tissue protein Li 189|transmembrane protein C1orf215	NM_001145454.2	NP_001138926.1	NC_000001.11	protein-coding	REVIEWED	1	-	25884185	25906876	Reference GRCh38.p12 Primary Assembly
hsa-mir-497_25g	NM_001003407.1	1	514.8	514.8	0.0211	0.0553	1	1	6.54e-06	10	1	0	13	240	0	0	182.8	0	0	21	7620	8	20	1709	1721	13	13	0	read	NM_001003407.1	9606	3983	ABLIM1	ABLIM|LIMAB1|LIMATIN|abLIM-1	actin binding LIM protein 1	actin-binding LIM protein 1|actin-binding LIM protein family member 1|actin-binding double-zinc-finger protein	NM_001003407.1	NP_001003407.1	NC_000010.11	protein-coding	REVIEWED	10	-	114431109	114821642	Reference GRCh38.p12 Primary Assembly
hsa-mir-497_25g	NR_134488.1	1	639.1	639.1	0.000279	0.0035	2	2	3.54e-10	8	1	0	20	240	12	0	258.1	0	0	21	3498	1	20	1844	1863	20	20	0	read	NR_134488.1	9606	4001	LMNB1	ADLD|LMN|LMN2|LMNB	lamin B1	lamin-B1	NR_134488.1	-	NC_000005.10	protein-coding	REVIEWED	5	+	126776622	126837019	Reference GRCh38.p12 Primary Assembly
hsa-mir-497_25g	NM_005359.5	1	598.9	598.9	0.0321	0.047	2	2	3.54e-10	12	1	0	10	240	0	0	233.9	0	0	21	8789	11	20	2324	2333	10	10	0	read	NM_005359.5	9606	4089	SMAD4	DPC4|JIP|MADH4|MYHRS	SMAD family member 4	mothers against decapentaplegic homolog 4|MAD homolog 4|SMAD, mothers against DPP homolog 4|deleted in pancreatic carcinoma locus 4|deletion target in pancreatic carcinoma 4|mothers against decapentaplegic, Drosophila, homolog of, 4	NM_005359.5	NP_005350.1	NC_000018.10	protein-coding	REVIEWED	18	+	51030212	51085041	Reference GRCh38.p12 Primary Assembly
hsa-mir-497_25g	NM_001324255.1	2	1234.8	680	0.000133	0.00201	5	5	0	8	1	1	17	240	28	0	170	0	0	21	11749	4	20	375	390	17	16	0	read	NM_001324255.1	9606	4131	MAP1B	FUTSCH|MAP5|PPP1R102	microtubule associated protein 1B	microtubule-associated protein 1B|protein phosphatase 1, regulatory subunit 102	NM_001324255.1	NP_001311184.1	NC_000005.10	protein-coding	VALIDATED	5	+	72107267	72209569	Reference GRCh38.p12 Primary Assembly
hsa-mir-497_25g	NM_004526.3	2	1057	542.4	0.00405	0.021	1	1	6.54e-06	13	1	0	8	312	0	0	146.4	0	0	21	3504	14	21	1991	1998	8	8	0	read	NM_004526.3	9606	4171	MCM2	BM28|CCNL1|CDCL1|D3S3194|DFNA70|MITOTIN|cdc19	minichromosome maintenance complex component 2	DNA replication licensing factor MCM2|cell devision cycle-like 1|cyclin-like 1|minichromosome maintenance deficient 2 (mitotin)|minichromosome maintenance protein 2 homolog|nuclear protein BM28	NM_004526.3	NP_004517.2	NC_000003.12	protein-coding	REVIEWED	3	+	127598356	127622435	Reference GRCh38.p12 Primary Assembly
hsa-mir-497_25g	NM_001135037.1	1	596.1	596.1	0.00214	0.018	1	1	6.54e-06	8.5	1	0	20	240	8	0	269.1	0	0	21	4588	1	20	2537	2556	20	20	0	read	NM_001135037.1	9606	4238	MFAP3	-	microfibril associated protein 3	microfibril-associated glycoprotein 3|microfibrillar associated protein 3	NM_001135037.1	NP_001128509.1	NC_000005.10	protein-coding	VALIDATED	5	+	154038958	154057453	Reference GRCh38.p12 Primary Assembly
hsa-mir-497_25g	NM_001166693.2	2	530.2	608.8	0.0253	0.047	3	6	2.12e-07	8	1	0	20	152	12	0	277.8	0	0	21	9303	1	20	9015	9034	20	20	0	read	NM_001166693.2	9606	4299	AFF1	AF4|MLLT2|PBM1	AF4/FMR2 family member 1	AF4/FMR2 family member 1|ALL1-fused gene from chromosome 4 protein|myeloid/lymphoid or mixed-lineage leukemia (trithorax homolog, Drosophila); translocated to, 2|pre-B-cell monocytic leukemia partner 1|proto-oncogene AF4	NM_001166693.2	NP_001160165.1	NC_000004.12	protein-coding	REVIEWED	4	+	86934605	87141053	Reference GRCh38.p12 Primary Assembly
hsa-mir-497_25g	NM_002444.2	1	605.7	605.7	0.003	0.0288	3	3	2.18e-14	8.5	1	0	20	152	8	0	279.7	0	0	21	3981	1	20	3789	3808	20	20	0	read	NM_002444.2	9606	4478	MSN	HEL70|IMD50	moesin	moesin|epididymis luminal protein 70|membrane-organizing extension spike protein	NM_002444.2	NP_002435.1	NC_000023.11	protein-coding	REVIEWED	X	+	65588381	65741930	Reference GRCh38.p12 Primary Assembly
hsa-mir-497_25g	NM_002449.4	1	770.4	770.4	0.00369	0.0219	7	7	0	13	1	0	9	240	0	0	211.4	0	0	21	2224	12	20	730	738	9	9	0	read	NM_002449.4	9606	4488	MSX2	CRS2|FPP|HOX8|MSH|PFM|PFM1	msh homeobox 2	homeobox protein MSX-2|homeobox protein Hox-8|msh homeo box 2|msh homeobox homolog 2	NM_002449.4	NP_002440.2	NC_000005.10	protein-coding	REVIEWED	5	+	174724495	174730898	Reference GRCh38.p12 Primary Assembly
hsa-mir-497_25g	NM_001330358.1	2	1054.5	539	0.0152	0.0379	1	1	6.54e-06	10	1	0	15	312	0	0	138	0	0	21	7207	7	21	667	681	15	15	0	read	NM_001330358.1	9606	4524	MTHFR	-	methylenetetrahydrofolate reductase	methylenetetrahydrofolate reductase|5,10-methylenetetrahydrofolate reductase (NADPH)|methylenetetrahydrofolate reductase (NAD(P)H)	NM_001330358.1	NP_001317287.1	NC_000001.11	protein-coding	REVIEWED	1	-	11785729	11806102	Reference GRCh38.p12 Primary Assembly
hsa-mir-497_25g	NM_001080779.1	1	745.8	745.8	0.0415	0.0585	6	6	0	7	1	0	20	240	12	0	198.8	0	0	21	4973	1	20	1164	1183	20	20	0	read	NM_001080779.1	9606	4641	MYO1C	MMI-beta|MMIb|NMI|myr2	myosin IC	unconventional myosin-Ic|myosin-I beta|myosin-Ic|nuclear myosin I	NM_001080779.1	NP_001074248.1	NC_000017.11	protein-coding	REVIEWED	17	-	1464185	1492706	Reference GRCh38.p12 Primary Assembly
hsa-mir-497_25g	NM_001303279.1	1	816.7	816.7	0.000377	0.00759	5	5	0	13	1	0	8	312	0	0	260.7	0	0	21	3537	14	21	1030	1037	8	8	0	read	NM_001303279.1	9606	4642	MYO1D	PPP1R108|myr4	myosin ID	unconventional myosin-Id|myosin-I gamma|protein phosphatase 1, regulatory subunit 108	NM_001303279.1	NP_001290208.1	NC_000017.11	protein-coding	VALIDATED	17	-	32492521	32877172	Reference GRCh38.p12 Primary Assembly
hsa-mir-497_25g	NM_000268.3	1	686.3	686.3	0.00236	0.0296	4	4	0	10.5	1	0	16	244	0	0	239.3	0	0	21	6046	6	21	4680	4695	16	16	0	read	NM_000268.3	9606	4771	NF2	ACN|BANF|SCH	neurofibromin 2	merlin|moesin-ezrin-radixin like|moesin-ezrin-radixin-like protein|moesin-ezrin-radizin-like protein|neurofibromin 2 (bilateral acoustic neuroma)|schwannomerlin|schwannomin	NM_000268.3	NP_000259.1	NC_000022.11	protein-coding	REVIEWED	22	+	29603555	29698599	Reference GRCh38.p12 Primary Assembly
hsa-mir-497_25g	NM_020529.2	1	1253.2	1253.2	5.42e-14	6.81e-12	19	19	0	8.5	1	0	18	240	24	0	180.2	0	0	21	1579	3	20	935	952	18	18	0	read	NM_020529.2	9606	4792	NFKBIA	IKBA|MAD-3|NFKBI	NFKB inhibitor alpha	NF-kappa-B inhibitor alpha|I-kappa-B-alpha|IkappaBalpha|ikB-alpha|major histocompatibility complex enhancer-binding protein MAD3|nuclear factor of kappa light chain gene enhancer in B-cells|nuclear factor of kappa light polypeptide gene enhancer in B-cells inhibitor, alpha	NM_020529.2	NP_065390.1	NC_000014.9	protein-coding	REVIEWED	14	-	35401509	35404753	Reference GRCh38.p12 Primary Assembly
hsa-mir-497_25g	NM_001349124.1	1	575.5	575.5	2.08e-06	3.16e-05	1	1	6.54e-06	13	1	0	9	240	0	0	256.5	0	0	21	7305	12	20	4905	4913	9	9	0	read	NM_001349124.1	9606	4820	NKTR	p104	natural killer cell triggering receptor	NK-tumor recognition protein|NK-TR protein|natural killer triggering receptor|natural killer-tumor recognition sequence|natural-killer cells cyclophilin-related protein	NM_001349124.1	NP_001336053.1	NC_000003.12	protein-coding	REVIEWED	3	+	42600006	42648740	Reference GRCh38.p12 Primary Assembly
hsa-mir-497_25g	NM_001033714.2	2	1613.6	1116.6	1.78e-06	0.000153	16	16	0	5	1	1	20	248	40	0	134.6	0	0	21	2772	1	20	833	851	20	19	0	read	NM_001033714.2	9606	4839	NOP2	NOL1|NOP120|NSUN1|p120	NOP2 nucleolar protein	probable 28S rRNA (cytosine(4447)-C(5))-methyltransferase|NOL1/NOP2/Sun domain family, member 1|NOP2 nucleolar protein homolog|nucleolar protein 1, 120kDa|nucleolar protein 2 homolog|proliferating-cell nucleolar antigen p120|proliferation-associated nucleolar protein p120|putative ribosomal RNA methyltransferase NOP2	NM_001033714.2	NP_001028886.1	NC_000012.12	protein-coding	VALIDATED	12	-	6556869	6568331	Reference GRCh38.p12 Primary Assembly
hsa-mir-497_25g	NM_001199302.1	1	784.5	784.5	0.00243	0.0484	6	7	0	12	1	0	9	248	0	0	248.5	0	0	21	3162	12	20	2251	2259	9	9	0	read	NM_001199302.1	9606	4848	CNOT2	CDC36|HSPC131|NOT2|NOT2H	CCR4-NOT transcription complex subunit 2	CCR4-NOT transcription complex subunit 2|CCR4-associated factor 2|negative regulator of transcription 2	NM_001199302.1	NP_001186231.1	NC_000012.12	protein-coding	REVIEWED	12	+	70242992	70354992	Reference GRCh38.p12 Primary Assembly
hsa-mir-497_25g	NM_000271.4	1	543.8	543.8	0.00396	0.021	1	1	6.54e-06	8.5	1	0	20	240	4	0	215.8	0	0	21	4827	1	20	3309	3328	20	20	0	read	NM_000271.4	9606	4864	NPC1	NPC|POGZ|SLC65A1	NPC intracellular cholesterol transporter 1	NPC intracellular cholesterol transporter 1|Niemann-Pick C1 protein|truncated Niemann-Pick C1	NM_000271.4	NP_000262.2	NC_000018.10	protein-coding	REVIEWED	18	-	23506183	23586616	Reference GRCh38.p12 Primary Assembly
hsa-mir-497_25g	NM_000274.3	1	529.7	529.7	0.00956	0.0182	1	1	6.54e-06	11	1	0	13	244	0	0	200.7	0	0	21	2102	9	21	1113	1125	13	13	0	read	NM_000274.3	9606	4942	OAT	GACR|HOGA|OATASE|OKT	ornithine aminotransferase	ornithine aminotransferase, mitochondrial|gyrate atrophy|ornithine delta-aminotransferase|ornithine-oxo-acid aminotransferase|testicular tissue protein Li 130	NM_000274.3	NP_000265.1	NC_000010.11	protein-coding	REVIEWED	10	-	124397302	124418975	Reference GRCh38.p12 Primary Assembly
hsa-mir-497_25g	NM_015560.2	1	642.1	642.1	0.000666	0.0118	2	2	3.54e-10	13	1	0	9	240	0	0	283.1	0	0	21	6345	12	20	4222	4230	9	9	0	read	NM_015560.2	9606	4976	OPA1	BERHS|MGM1|MTDPS14|NPG|NTG|largeG	OPA1, mitochondrial dynamin like GTPase	dynamin-like 120 kDa protein, mitochondrial|dynamin-like guanosine triphosphatase|mitochondrial dynamin-like GTPase|optic atrophy 1 (autosomal dominant)|optic atrophy protein 1	NM_015560.2	NP_056375.2	NC_000003.12	protein-coding	REVIEWED	3	+	193593143	193697810	Reference GRCh38.p12 Primary Assembly
hsa-mir-497_25g	NM_001128620.1	1	516.4	516.4	0.0603	0.0764	1	1	6.54e-06	6	1	0	20	240	28	0	142.4	0	0	21	3484	1	20	2901	2920	20	20	0	read	NM_001128620.1	9606	5058	PAK1	PAKalpha	p21 (RAC1) activated kinase 1	serine/threonine-protein kinase PAK 1|STE20 homolog, yeast|alpha-PAK|p21 protein (Cdc42/Rac)-activated kinase 1|p21/Cdc42/Rac1-activated kinase 1 (STE20 homolog, yeast)|p21/Cdc42/Rac1-activated kinase 1 (yeast Ste20-related)|p65-PAK	NM_001128620.1	NP_001122092.1	NC_000011.10	protein-coding	REVIEWED	11	-	77322014	77514956	Reference GRCh38.p12 Primary Assembly
hsa-mir-497_25g	NM_002577.4	1	527.7	527.7	0.0193	0.0347	1	1	6.54e-06	13	1	0	8	248	0	0	195.7	0	0	21	6139	13	20	960	967	8	8	0	read	NM_002577.4	9606	5062	PAK2	PAK65|PAKgamma	p21 (RAC1) activated kinase 2	serine/threonine-protein kinase PAK 2|PAK-2|S6/H4 kinase|gamma-PAK|p21 (CDKN1A)-activated kinase 2|p21 protein (Cdc42/Rac)-activated kinase 2|p21-activated kinase 2|p58	NM_002577.4	NP_002568.2	NC_000003.12	protein-coding	REVIEWED	3	+	196739856	196832646	Reference GRCh38.p12 Primary Assembly
hsa-mir-497_25g	NM_000280.4	1	724.5	724.5	0.00131	0.0232	6	6	0	7.5	1	0	19	240	16	0	171.5	0	0	21	6969	2	20	1613	1631	19	19	0	read	NM_000280.4	9606	5080	PAX6	AN|AN2|ASGD5|D11S812E|FVH1|MGDA|WAGR	paired box 6	paired box protein Pax-6|aniridia type II protein|oculorhombin|paired box homeotic gene-6	NM_000280.4	NP_000271.1	NC_000011.10	protein-coding	REVIEWED	11	-	31784791	31817960	Reference GRCh38.p12 Primary Assembly
hsa-mir-497_25g	NM_001353130.1	1	2109.7	2109.7	1.14e-13	1.55e-11	39	39	0	13	1	0	9	240	0	0	270.7	0	0	21	6474	12	20	940	948	9	9	0	read	NM_001353130.1	9606	5087	PBX1	CAKUHED	PBX homeobox 1	pre-B-cell leukemia transcription factor 1|homeobox protein PBX1|homeobox protein PRL|pre-B-cell leukemia homeobox 1	NM_001353130.1	NP_001340059.1	NC_000001.11	protein-coding	REVIEWED	1	+	164559359	164886046	Reference GRCh38.p12 Primary Assembly
hsa-mir-497_25g	NM_005022.3	1	5151.3	5151.3	0	0	115	147	0	8	1	0	19	240	28	0	231.3	0	0	21	1365	2	20	1212	1230	19	19	0	read	NM_005022.3	9606	5216	PFN1	ALS18	profilin 1	profilin-1|epididymis tissue protein Li 184a|profilin I	NM_005022.3	NP_005013.1	NC_000017.11	protein-coding	REVIEWED	17	-	4945649	4949087	Reference GRCh38.p12 Primary Assembly
hsa-mir-497_25g	NM_000296.3	2	1057.7	579.5	0.00455	0.0351	2	2	3.54e-10	7	1	1	20	240	36	0	179.5	0	0	21	14135	2	20	4552	4571	19	20	0	read	NM_000296.3	9606	5310	PKD1	PBP|PC1|Pc-1|TRPP1	polycystin 1, transient receptor potential channel interacting	polycystin-1|autosomal dominant polycystic kidney disease 1 protein|polycystic kidney disease 1 (autosomal dominant)|polycystic kidney disease-associated protein|transient receptor potential cation channel, subfamily P, member 1	NM_000296.3	NP_000287.3	NC_000016.10	protein-coding	REVIEWED	16	-	2088707	2135897	Reference GRCh38.p12 Primary Assembly
hsa-mir-497_25g	NM_001145311.1	2	1081.2	581.4	0.00703	0.0263	2	2	3.54e-10	10	1	0	17	240	16	0	205.4	0	0	21	2908	4	20	1798	1814	17	17	0	read	NM_001145311.1	9606	5346	PLIN1	FPLD4|PERI|PLIN	perilipin 1	perilipin-1|lipid droplet-associated protein	NM_001145311.1	NP_001138783.1	NC_000015.10	protein-coding	REVIEWED	15	-	89664364	89679416	Reference GRCh38.p12 Primary Assembly
hsa-mir-497_25g	NM_001136025.4	1	940.4	940.4	5.1e-07	3.48e-05	10	18	0	10	1	0	15	240	0	0	251.4	0	0	21	3341	6	20	2284	2298	15	15	0	read	NM_001136025.4	9606	5358	PLS3	BMND18|T-plastin	plastin 3	plastin-3|T fimbrin|T plastin	NM_001136025.4	NP_001129497.1	NC_000023.11	protein-coding	REVIEWED	X	+	115560849	115650860	Reference GRCh38.p12 Primary Assembly
hsa-mir-497_25g	NM_001034194.1	1	937.3	937.3	2.21e-10	1.34e-08	11	12	0	8	1	1	19	240	8	0	210.3	0	0	21	1644	3	20	537	555	18	19	0	read	NM_001034194.1	9606	5393	EXOSC9	PM/Scl-75|PMSCL1|RRP45|Rrp45p|p5|p6	exosome component 9	exosome complex component RRP45|P75 polymyositis-scleroderma overlap syndrome associated autoantigen|PMSCL autoantigen, 75kD|autoantigen PM/Scl 1|exosome complex exonuclease RRP45|polymyositis/scleroderma autoantigen 1, 75kDa	NM_001034194.1	NP_001029366.1	NC_000004.12	protein-coding	REVIEWED	4	+	121801316	121817020	Reference GRCh38.p12 Primary Assembly
hsa-mir-497_25g	NM_002687.3	1	661.6	661.6	0.00268	0.0117	3	4	6.65e-11	11	1	0	13	240	0	0	258.6	0	0	21	3606	8	20	2329	2341	13	13	0	read	NM_002687.3	9606	5411	PNN	DRS|DRSP|SDK3|memA	pinin, desmosome associated protein	pinin|140 kDa nuclear and cell adhesion-related phosphoprotein|SR-like protein|desmosome-associated protein|domain-rich serine protein|melanoma metastasis clone A protein|neutrophil protein|nuclear protein SDK3	NM_002687.3	NP_002678.2	NC_000014.9	protein-coding	VALIDATED	14	+	39175182	39183217	Reference GRCh38.p12 Primary Assembly
hsa-mir-497_25g	NM_001256849.1	1	607.2	607.2	0.0299	0.0445	3	3	2.18e-14	7.5	1	1	17	252	16	0	170.2	0	0	21	3467	5	21	3104	3119	17	16	0	read	NM_001256849.1	9606	5424	POLD1	CDC2|CRCS10|MDPL|POLD	DNA polymerase delta 1, catalytic subunit	DNA polymerase delta catalytic subunit|CDC2 homolog|DNA polymerase subunit delta p125|polymerase (DNA directed), delta 1, catalytic subunit 125kDa|polymerase (DNA) delta 1, catalytic subunit	NM_001256849.1	NP_001243778.1	NC_000019.10	protein-coding	REVIEWED	19	+	50384290	50418017	Reference GRCh38.p12 Primary Assembly
hsa-mir-497_25g	NM_001291969.1	1	789.6	789.6	1.48e-06	7.17e-05	6	6	0	8	1	1	17	248	44	0	211.6	0	0	21	8053	5	20	2078	2094	16	17	0	read	NM_001291969.1	9606	5429	POLH	RAD30|RAD30A|XP-V|XPV	DNA polymerase eta	DNA polymerase eta|RAD30 homolog A|polymerase (DNA directed), eta|polymerase (DNA) eta|xeroderma pigmentosum variant type protein	NM_001291969.1	NP_001278898.1	NC_000006.12	protein-coding	REVIEWED	6	+	43576140	43620522	Reference GRCh38.p12 Primary Assembly
hsa-mir-497_25g	NM_000938.2	1	523.7	523.7	0.00146	0.0117	1	1	6.54e-06	7.5	1	1	18	252	16	0	169.7	0	0	21	4062	4	21	3752	3768	18	17	0	read	NM_000938.2	9606	5431	POLR2B	POL2RB|RPB2|hRPB140	RNA polymerase II subunit B	DNA-directed RNA polymerase II subunit RPB2|DNA-directed RNA polymerase II 140 kDa polypeptide|DNA-directed RNA polymerase II subunit B|RNA polymerase II second largest subunit|RNA polymerase II subunit 2|RNA polymerase II subunit B2|polymerase (RNA) II (DNA directed) polypeptide B, 140kDa|polymerase (RNA) II subunit B	NM_000938.2	NP_000929.1	NC_000004.12	protein-coding	REVIEWED	4	+	56978639	57031161	Reference GRCh38.p12 Primary Assembly
hsa-mir-497_25g	NM_001282179.1	1	559.6	559.6	0.00228	0.0167	1	1	6.54e-06	13	1	0	8	312	0	0	163.6	0	0	21	4120	14	21	158	165	8	8	0	read	NM_001282179.1	9606	5529	PPP2R5E	B56E|B56epsilon	protein phosphatase 2 regulatory subunit B'epsilon	serine/threonine-protein phosphatase 2A 56 kDa regulatory subunit epsilon isoform|PP2A, B subunit, B' epsilon|PP2A, B subunit, B56 epsilon|PP2A, B subunit, PR61 epsilon|PP2A, B subunit, R5 epsilon|epsilon isoform of regulatory subunit B56, protein phosphatase 2A|protein phosphatase 2 regulatory subunit B', epsilon|protein phosphatase 2, regulatory subunit B (B56), epsilon isoform|serine/threonine…	NM_001282179.2	NP_001269108.1	NC_000014.9	protein-coding	REVIEWED	14	-	63371355	63543394	Reference GRCh38.p12 Primary Assembly
hsa-mir-497_25g	NM_002737.2	1	780.5	780.5	0.00604	0.0162	5	6	0	4	1	1	21	240	48	0	235.5	0	0	21	8787	1	20	2947	2967	20	21	0	read	NM_002737.2	9606	5578	PRKCA	AAG6|PKC-alpha|PKCA|PRKACA	protein kinase C alpha	protein kinase C alpha type|PKC-A|aging-associated gene 6	NM_002737.2	NP_002728.1	NC_000017.11	protein-coding	REVIEWED	17	+	66302639	66810743	Reference GRCh38.p12 Primary Assembly
hsa-mir-497_25g	NM_002748.3	1	539.3	539.3	0.0169	0.0329	1	1	6.54e-06	9	1	1	16	240	0	0	212.3	0	0	21	4225	6	20	529	544	15	16	0	read	NM_002748.3	9606	5597	MAPK6	ERK3|HsT17250|PRKM6|p97MAPK	mitogen-activated protein kinase 6	mitogen-activated protein kinase 6|ERK-3|MAP kinase 6|MAP kinase isoform p97|MAPK 6|extracellular signal-regulated kinase 3|extracellular signal-regulated kinase, p97|p97-MAPK|protein kinase, mitogen-activated 5|protein kinase, mitogen-activated 6	NM_002748.3	NP_002739.1	NC_000015.10	protein-coding	REVIEWED	15	+	52019213	52066264	Reference GRCh38.p12 Primary Assembly
hsa-mir-497_25g	NM_000021.3	1	968.5	968.5	1.18e-05	0.000611	11	11	0	8.5	1	0	20	240	8	0	235.5	0	0	21	6107	1	20	676	695	20	20	0	read	NM_000021.3	9606	5663	PSEN1	ACNINV3|AD3|FAD|PS-1|PS1|S182	presenilin 1	presenilin-1|presenilin-1 isoform I-467	NM_000021.3	NP_000012.1	NC_000014.9	protein-coding	REVIEWED	14	+	73136434	73223690	Reference GRCh38.p12 Primary Assembly
hsa-mir-497_25g	NM_004160.5	1	524.6	524.6	0.0102	0.0423	1	1	6.54e-06	11.5	1	0	12	240	0	0	202.6	0	0	21	1069	9	20	65	76	12	12	0	read	NM_004160.5	9606	5697	PYY	PYY-I|PYY1	peptide YY	peptide YY|peptide tyrosine tyrosine|prepro-PYY	NM_004160.5	NP_004151.3	NC_000017.11	protein-coding	REVIEWED	17	-	43952732	44004468	Reference GRCh38.p12 Primary Assembly
hsa-mir-497_25g	NM_006264.2	1	532.7	532.7	0.00964	0.0321	1	1	6.54e-06	9	1	1	15	240	0	0	211.7	0	0	21	8516	6	20	646	659	15	14	0	read	NM_006264.2	9606	5783	PTPN13	FAP-1|PNP1|PTP-BAS|PTP-BL|PTP1E|PTPL1|PTPLE|hPTP1E	protein tyrosine phosphatase, non-receptor type 13	tyrosine-protein phosphatase non-receptor type 13|fas-associated protein-tyrosine phosphatase 1|hPTPE1|protein tyrosine phosphatase, non-receptor type 13 (APO-1/CD95 (Fas)-associated phosphatase)|protein-tyrosine phosphatase 1E|protein-tyrosine phosphatase PTPL1	NM_006264.2	NP_006255.1	NC_000004.12	protein-coding	REVIEWED	4	+	86594306	86815175	Reference GRCh38.p12 Primary Assembly
hsa-mir-497_25g	NM_001329137.1	1	568.8	568.8	0.0161	0.04	2	2	3.54e-10	8.5	1	1	16	240	0	0	207.8	0	0	21	6910	5	20	2429	2443	16	15	0	read	NM_001329137.1	9606	5792	PTPRF	BNAH2|LAR	protein tyrosine phosphatase, receptor type F	receptor-type tyrosine-protein phosphatase F|LCA-homolog|leukocyte antigen-related (LAR) PTP receptor|leukocyte antigen-related tyrosine phosphatase|leukocyte common antigen related|protein tyrosine phosphatase, receptor type, F polypeptide|receptor-linked protein-tyrosine phosphatase LAR	NM_001329137.1	NP_001316066.1	NC_000001.11	protein-coding	REVIEWED	1	+	43522237	43623671	Reference GRCh38.p12 Primary Assembly
hsa-mir-497_25g	NM_001105244.1	1	585.8	585.8	0.00536	0.0175	1	1	6.54e-06	8.5	1	1	18	240	36	0	230.8	0	0	21	5624	4	20	4263	4280	17	18	0	read	NM_001105244.1	9606	5797	PTPRM	PTPRL1|R-PTP-MU|RPTPM|RPTPU|hR-PTPu	protein tyrosine phosphatase, receptor type M	receptor-type tyrosine-protein phosphatase mu|protein tyrosine phosphatase mu|protein tyrosine phosphatase, receptor type, mu polypeptide	NM_001105244.1	NP_001098714.1	NC_000018.10	protein-coding	REVIEWED	18	+	7567315	8406860	Reference GRCh38.p12 Primary Assembly
hsa-mir-497_25g	NM_002862.3	2	1578.5	1097.2	1.48e-06	9.48e-05	14	14	0	3	1	0	20	248	84	0	119.2	0	0	21	4131	1	20	1235	1254	20	20	0	read	NM_002862.3	9606	5834	PYGB	GPBB	glycogen phosphorylase B	glycogen phosphorylase, brain form|phosphorylase, glycogen; brain	NM_002862.3	NP_002853.2	NC_000020.11	protein-coding	REVIEWED	20	+	25248038	25298011	Reference GRCh38.p12 Primary Assembly
hsa-mir-497_25g	NM_001243718.1	2	1498.4	825.2	6.6e-05	0.0027	8	8	0	6.5	1	1	20	240	12	0	210.2	0	0	21	3096	1	20	952	970	20	19	0	read	NM_001243718.1	9606	5870	RAB6A	RAB6	RAB6A, member RAS oncogene family	ras-related protein Rab-6A|RAB6, member RAS oncogene family|Rab GTPase	NM_001243718.1	NP_001230647.1	NC_000011.10	protein-coding	REVIEWED	11	-	73675637	73761155	Reference GRCh38.p12 Primary Assembly
hsa-mir-497_25g	NM_001244713.1	1	559.2	559.2	0.00626	0.0149	1	2	0.00175	12	1	0	12	240	0	0	240.2	0	0	21	3852	9	20	2235	2246	12	12	0	read	NM_001244713.1	9606	5887	RAD23B	HHR23B|HR23B|P58	RAD23 homolog B, nucleotide excision repair protein	UV excision repair protein RAD23 homolog B|RAD23, yeast homolog of, B|XP-C repair complementing complex 58 kDa|XP-C repair complementing protein|XP-C repair-complementing complex 58 kDa protein	NM_001244713.1	NP_001231642.1	NC_000009.12	protein-coding	REVIEWED	9	+	107283235	107332193	Reference GRCh38.p12 Primary Assembly
hsa-mir-497_25g	NM_002892.3	1	644.1	644.1	1.42e-05	0.000422	3	3	2.18e-14	8.5	1	0	15	240	0	0	224.1	0	0	21	5792	6	20	4050	4064	15	15	0	read	NM_002892.3	9606	5926	ARID4A	RBBP-1|RBBP1|RBP-1|RBP1	AT-rich interaction domain 4A	AT-rich interactive domain-containing protein 4A|ARID domain-containing protein 4A|AT rich interactive domain 4A (RBP1-like)|retinoblastoma-binding protein 1	NM_002892.3	NP_002883.3	NC_000014.9	protein-coding	REVIEWED	14	+	58298384	58373732	Reference GRCh38.p12 Primary Assembly
hsa-mir-497_25g	NM_001113182.2	1	547.7	547.7	0.00759	0.0238	1	1	6.54e-06	12	1	0	11	240	0	0	225.7	0	0	21	4807	10	20	2705	2715	11	11	0	read	NM_001113182.2	9606	6046	BRD2	BRD2-IT1|D6S113E|FSH|FSRG1|NAT|O27.1.1|RING3|RNF3	bromodomain containing 2	bromodomain-containing protein 2|BRD2 intronic transcript 1|female sterile homeotic-related gene 1|really interesting new gene 3 protein	NM_001113182.2	NP_001106653.1	NC_000006.12	protein-coding	REVIEWED	6	+	32968659	32981504	Reference GRCh38.p12 Primary Assembly
hsa-mir-497_25g	NM_005406.2	1	581.5	581.5	0.00701	0.0263	1	3	0.0122	10	1	0	15	248	0	0	246.5	0	0	21	6650	6	20	5268	5282	15	15	0	read	NM_005406.2	9606	6093	ROCK1	P160ROCK|ROCK-I	Rho associated coiled-coil containing protein kinase 1	rho-associated protein kinase 1|p160 ROCK-1|renal carcinoma antigen NY-REN-35	NM_005406.2	NP_005397.1	NC_000018.10	protein-coding	REVIEWED	18	-	20949739	21111850	Reference GRCh38.p12 Primary Assembly
hsa-mir-497_25g	NM_000983.3	2	1228.9	680.6	0.000675	0.0119	4	4	0	8.5	1	1	16	240	0	0	231.6	0	0	21	2099	6	20	982	997	15	16	0	read	NM_000983.3	9606	6146	RPL22	EAP|HBP15|HBP15/L22|L22	ribosomal protein L22	60S ribosomal protein L22|EBER-associated protein|Epstein-Barr virus small RNA-associated protein|Epstein-Barr-encoded RNA-associated protein|heparin-binding protein 15|heparin-binding protein HBp15|large ribosomal subunit protein eL22	NM_000983.3	NP_000974.1	NC_000001.11	protein-coding	REVIEWED	1	-	6185019	6199618	Reference GRCh38.p12 Primary Assembly
hsa-mir-497_25g	NM_001009.3	1	684.7	684.7	3.91e-06	0.000144	5	5	0	9	1	0	20	240	4	0	198.7	0	0	21	755	1	20	596	615	20	20	0	read	NM_001009.3	9606	6193	RPS5	S5	ribosomal protein S5	40S ribosomal protein S5|small ribosomal subunit protein uS7	NM_001009.3	NP_001000.2	NC_000019.10	protein-coding	REVIEWED	19	+	58387268	58394803	Reference GRCh38.p12 Primary Assembly
hsa-mir-497_25g	NM_001201338.1	1	1193.3	1193.3	6.41e-09	1.11e-06	16	16	0	10.5	1	0	15	240	0	0	270.3	0	0	21	3121	6	20	3009	3023	15	15	0	read	NM_001201338.1	9606	6294	SAFB	HAP|HET|SAB-B1|SAF-B|SAF-B1|SAFB1	scaffold attachment factor B	scaffold attachment factor B1|HSP27 ERE-TATA-binding protein|HSP27 estrogen response element-TATA box-binding protein|Hsp27 ERE-TATA binding protein|glutathione S-transferase fusion protein|heat-shock protein (HSP27) estrogen response element and TATA box-binding protein	NM_001201338.1	NP_001188267.1	NC_000019.10	protein-coding	REVIEWED	19	+	5623034	5668477	Reference GRCh38.p12 Primary Assembly
hsa-mir-497_25g	NM_001281435.1	1	560.3	560.3	0.00693	0.0221	1	1	6.54e-06	5.5	1	0	19	248	8	0	190.3	0	0	21	3873	2	20	2090	2108	19	19	11.5	read	NM_001281435.1	9606	6416	MAP2K4	JNKK|JNKK1|MAPKK4|MEK4|MKK4|PRKMK4|SAPKK-1|SAPKK1|SEK1|SERK1|SKK1	mitogen-activated protein kinase kinase 4	dual specificity mitogen-activated protein kinase kinase 4|JNK-activated kinase 1|JNK-activating kinase 1|MAP kinase kinase 4|MAPK/ERK kinase 4|MAPKK 4|MEK 4|SAPK/ERK kinase 1|c-Jun N-terminal kinase kinase 1|stress-activated protein kinase kinase 1	NM_001281435.1	NP_001268364.1	NC_000017.11	protein-coding	REVIEWED	17	+	12020817	12143830	Reference GRCh38.p12 Primary Assembly
hsa-mir-497_25g	NM_003017.4	1	763.6	763.6	0.000693	0.0156	5	5	0	6.5	1	1	20	252	28	0	232.6	0	0	21	3144	3	21	376	395	19	20	0	read	NM_003017.4	9606	6428	SRSF3	SFRS3|SRp20	serine and arginine rich splicing factor 3	serine/arginine-rich splicing factor 3|pre-mRNA splicing factor SRp20|pre-mRNA-splicing factor SRP20|splicing factor, arginine/serine-rich 3|splicing factor, arginine/serine-rich, 20-kD	NM_003017.4	NP_003008.1	NC_000006.12	protein-coding	REVIEWED	6	+	36594312	36604466	Reference GRCh38.p12 Primary Assembly
hsa-mir-497_25g	NM_003026.3	1	547.8	547.8	0.022	0.036	1	1	6.54e-06	13	1	0	8	312	0	0	151.8	0	0	21	2742	14	21	1169	1176	8	8	0	read	NM_003026.3	9606	6456	SH3GL2	CNSA2|EEN-B1|SH3D2A|SH3P4	SH3 domain containing GRB2 like 2, endophilin A1	endophilin-A1|Endophilin A1 BAR domain|SH3 domain protein 2A|SH3 domain-containing GRB2-like protein 2|SH3-domain GRB2-like 2|bA335L15.1 (SH3-domain GRB2-like 2)|endophilin-1	NM_003026.3	NP_003017.1	NC_000009.12	protein-coding	VALIDATED	9	+	17578953	17797128	Reference GRCh38.p12 Primary Assembly
hsa-mir-497_25g	NM_001166356.1	1	570.7	570.7	0.00593	0.0219	2	2	3.54e-10	9	1	0	15	240	0	0	195.7	0	0	21	2265	6	20	146	160	15	15	0	read	NM_001166356.1	9606	6472	SHMT2	GLYA|HEL-S-51e|SHMT	serine hydroxymethyltransferase 2	serine hydroxymethyltransferase, mitochondrial|GLY A+|epididymis secretory sperm binding protein Li 51e|glycine auxotroph A, human complement for hamster|glycine hydroxymethyltransferase|serine aldolase|serine hydroxymethylase|serine hydroxymethyltransferase 2 (mitochondrial)|serine methylase|threonine aldolase	NM_001166356.1	NP_001159828.1	NC_000012.12	protein-coding	REVIEWED	12	+	57229572	57234934	Reference GRCh38.p12 Primary Assembly
hsa-mir-497_25g	NM_001024845.2	2	4048.9	3563.1	0	0	77	77	0	9	1	0	15	248	0	0	180.1	0	0	21	3236	6	20	2980	2994	15	15	0	read	NM_001024845.2	9606	6536	SLC6A9	GCENSG|GLYT1	solute carrier family 6 member 9	sodium- and chloride-dependent glycine transporter 1|glyT-1|solute carrier family 6 (neurotransmitter transporter, glycine), member 9	NM_001024845.2	NP_001020016.1	NC_000001.11	protein-coding	REVIEWED	1	-	43996482	44031491	Reference GRCh38.p12 Primary Assembly
hsa-mir-497_25g	NM_003132.2	1	555.7	555.7	0.0019	0.011	2	9	0.00888	4.5	1	0	20	240	24	0	134.7	0	0	21	1273	1	20	1119	1138	20	20	0	read	NM_003132.2	9606	6723	SRM	PAPT|SPDSY|SPS1|SRML1	spermidine synthase	spermidine synthase|putrescine aminopropyltransferase|spermidine synthase-1	NM_003132.2	NP_003123.2	NC_000001.11	protein-coding	VALIDATED	1	-	11054591	11060052	Reference GRCh38.p12 Primary Assembly
hsa-mir-497_25g	NM_001267722.1	2	2264.3	1755.7	2.11e-12	5.48e-10	29	29	0	9	1	0	17	240	12	0	295.7	0	0	21	3710	4	20	2997	3013	17	17	0	read	NM_001267722.1	9606	6731	SRP72	BMFF|BMFS1|HEL103	signal recognition particle 72	signal recognition particle subunit SRP72|epididymis luminal protein 103|signal recognition particle 72 kDa protein|signal recognition particle 72kD|signal recognition particle 72kDa	NM_001267722.1	NP_001254651.1	NC_000004.12	protein-coding	REVIEWED	4	+	56467595	56503680	Reference GRCh38.p12 Primary Assembly
hsa-mir-497_25g	NM_001193533.2	1	702.2	702.2	0.000126	0.00364	5	10	3.3e-11	9.5	1	0	16	240	0	0	213.2	0	0	21	5790	5	20	2469	2484	16	16	0	read	NM_001193533.2	9606	6787	NEK4	NRK2|STK2|pp12301	NIMA related kinase 4	serine/threonine-protein kinase Nek4|NIMA (never in mitosis gene a)-related kinase 4|never in mitosis A-related kinase 4|nimA-related protein kinase 4|serine/threonine kinase 2|serine/threonine protein kinase-2|serine/threonine-protein kinase NRK2|serine/threonine-protein kinase Nek4 variant 2	NM_001193533.2	NP_001180462.1	NC_000003.12	protein-coding	REVIEWED	3	-	52708448	52770948	Reference GRCh38.p12 Primary Assembly
hsa-mir-497_25g	NM_001323303.1	1	755.5	755.5	0.000664	0.0142	6	11	2.35e-14	8.5	1	0	16	240	0	0	218.5	0	0	21	2507	5	20	1800	1815	16	16	0	read	NM_001323303.1	9606	6790	AURKA	AIK|ARK1|AURA|BTAK|PPP1R47|STK15|STK6|STK7	aurora kinase A	aurora kinase A|aurora 2|aurora/IPL1-like kinase|aurora/IPL1-related kinase 1|breast tumor-amplified kinase|protein phosphatase 1, regulatory subunit 47|serine/threonine protein kinase 15|serine/threonine-protein kinase 6|serine/threonine-protein kinase aurora-A	NM_001323303.1	NP_001310232.1	NC_000020.11	protein-coding	REVIEWED	20	-	56369388	56392336	Reference GRCh38.p12 Primary Assembly
hsa-mir-497_25g	NR_001587.1	1	644.7	644.7	0.000247	0.00334	3	3	2.18e-14	8.5	1	0	16	240	0	0	227.7	0	0	21	1537	5	20	1090	1105	16	16	0	read	NR_001587.1	9606	6791	AURKAP1	AURKAPS1|AurAps1|STK6P	aurora kinase A pseudogene 1	serine/threonine kinase 6 pseudogene	NR_001587.1	-	NC_000001.11	pseudo	VALIDATED	1	-	220266178	220267714	Reference GRCh38.p12 Primary Assembly
hsa-mir-497_25g	NM_001032221.3	1	615.2	615.2	0.00255	0.0141	2	2	3.54e-10	6.5	1	0	20	240	4	0	229.2	0	0	21	3850	1	20	951	970	20	20	0	read	NM_001032221.3	9606	6812	STXBP1	MUNC18-1|NSEC1|P67|RBSEC1|UNC18	syntaxin binding protein 1	syntaxin-binding protein 1|N-Sec1|neuronal SEC1|protein unc-18 homolog 1|protein unc-18 homolog A|unc-18A|unc18-1	NM_001032221.3	NP_001027392.1	NC_000009.12	protein-coding	REVIEWED	9	+	127612206	127692715	Reference GRCh38.p12 Primary Assembly
hsa-mir-497_25g	NM_133640.4	1	537.8	537.8	0.0283	0.0538	1	1	6.54e-06	8.5	1	0	16	240	0	0	200.8	0	0	21	1480	5	20	1104	1119	16	16	0	read	NM_133640.4	9606	6837	MED22	MED24|SRB6|SURF5|surf-5	mediator complex subunit 22	mediator of RNA polymerase II transcription subunit 22|surfeit locus protein 5	NM_133640.4	NP_598395.1	NC_000009.12	protein-coding	REVIEWED	9	-	133340900	133348155	Reference GRCh38.p12 Primary Assembly
hsa-mir-497_25g	NM_001286074.1	1	569.4	569.4	0.00427	0.0202	2	2	3.54e-10	13	1	0	8	312	0	0	133.4	0	0	21	7740	14	21	124	131	8	8	0	read	NM_001286074.1	9606	6872	TAF1	BA2R|CCG1|CCGS|DYT3|DYT3/TAF1|KAT4|MRXS33|N-TAF1|NSCL2|OF|P250|TAF(II)250|TAF2A|TAFII-250|TAFII250|XDP	TATA-box binding protein associated factor 1	transcription initiation factor TFIID subunit 1|TAF1 RNA polymerase II, TATA box binding protein (TBP)-associated factor, 250kDa|TBP-associated factor 250 kDa|cell cycle gene 1 protein|cell cycle, G1 phase defect|complementation of cell cycle block, G1-to-S|transcription factor TFIID p250 polypeptide	NM_001286074.1	NP_001273003.1	NC_000023.11	protein-coding	REVIEWED	X	+	71366219	71530524	Reference GRCh38.p12 Primary Assembly
hsa-mir-497_25g	NM_001201334.1	1	699.1	699.1	0.000448	0.0113	3	3	2.18e-14	9	1	0	16	312	0	0	214.1	0	0	21	4223	6	21	103	118	16	16	0	read	NM_001201334.1	9606	6936	GCFC2	C2orf3|DNABF|GCF|TCF9	GC-rich sequence DNA-binding factor 2	GC-rich sequence DNA-binding factor 2|GC binding factor|GC bindng factor|TCF-9|transcription factor 9 (binds GC-rich sequences)	NM_001201334.1	NP_001188263.1	NC_000002.12	protein-coding	VALIDATED	2	-	75655605	75711641	Reference GRCh38.p12 Primary Assembly
hsa-mir-497_25g	NM_007111.4	1	588.4	588.4	0.00638	0.0258	1	1	6.54e-06	12	1	0	9	320	0	0	178.4	0	0	21	2651	13	21	652	660	9	9	0	read	NM_007111.4	9606	7027	TFDP1	DILC|DP1|DRTF1|Dp-1	transcription factor Dp-1	transcription factor Dp-1|DRTF1-polypeptide 1|E2F dimerization partner 1|E2F-related transcription factor|down-regulated in liver cancer stem cells	NM_007111.4	NP_009042.1	NC_000013.11	protein-coding	REVIEWED	13	+	113584687	113641472	Reference GRCh38.p12 Primary Assembly
hsa-mir-497_25g	NM_001351508.1	1	973.4	973.4	0.000664	0.0061	11	11	0	5	1	1	21	240	16	0	226.4	0	0	21	4796	1	20	1774	1794	20	21	0	read	NM_001351508.1	9606	7072	TIA1	TIA-1|WDM	TIA1 cytotoxic granule associated RNA binding protein	nucleolysin TIA-1 isoform p40|nucleolysin TIA-1|T-cell-restricted intracellular antigen-1|p40-TIA-1 (containing p15-TIA-1)	NM_001351508.1	NP_001338437.1	NC_000002.12	protein-coding	REVIEWED	2	-	70209443	70248792	Reference GRCh38.p12 Primary Assembly
hsa-mir-497_25g	NM_000546.5	1	533.9	533.9	0.0168	0.0501	1	11	0.267	8.5	1	0	17	240	12	0	193.9	0	0	21	2591	4	20	2555	2571	17	17	0	read	NM_000546.5	9606	7157	TP53	BCC7|LFS1|P53|TRP53	tumor protein p53	cellular tumor antigen p53|antigen NY-CO-13|mutant tumor protein 53|p53 tumor suppressor|phosphoprotein p53|transformation-related protein 53|tumor protein 53|tumor supressor p53	NM_000546.5	NP_000537.3	NC_000017.11	protein-coding	REVIEWED	17	-	7668401	7687549	Reference GRCh38.p12 Primary Assembly
hsa-mir-497_25g	NM_001025252.2	1	842.4	842.4	0.00146	0.0143	7	7	0	9	1	0	19	240	12	0	270.4	0	0	21	4313	2	20	2466	2484	19	19	0	read	NM_001025252.2	9606	7163	TPD52	D52|N8L|PC-1|PrLZ|hD52	tumor protein D52	tumor protein D52|prostate and colon associated protein|prostate leucine zipper|protein N8	NM_001025252.2	NP_001020423.1	NC_000008.11	protein-coding	VALIDATED	8	-	80034867	80171658	Reference GRCh38.p12 Primary Assembly
hsa-mir-497_25g	NM_001025203.1	1	559.9	559.9	0.0311	0.0635	1	1	6.54e-06	11	1	0	12	312	0	0	159.9	0	0	21	971	10	21	540	551	12	12	0	read	NM_001025203.1	9606	7307	U2AF1	FP793|RN|RNU2AF1|U2AF35|U2AFBP	U2 small nuclear RNA auxiliary factor 1	splicing factor U2AF 35 kDa subunit|U2 small nuclear RNA auxillary factor 1|U2 small nuclear ribonucleoprotein auxillary factor, 35-KD subunit|U2 snRNP auxiliary factor small subunit|U2(RNU2) small nuclear RNA auxiliary factor binding protein|splicing factor U2AF 35kDa subunit	NM_001025203.1	NP_001020374.1	NC_000021.9	protein-coding	REVIEWED	21	-	43092955	43108290	Reference GRCh38.p12 Primary Assembly
hsa-mir-497_25g	NM_006003.2	1	937.8	937.8	3.29e-08	3.02e-06	11	11	0	13	1	0	9	240	0	0	218.8	0	0	21	1224	12	20	490	498	9	9	0	read	NM_006003.2	9606	7386	UQCRFS1	RIP1|RIS1|RISP|UQCR5	ubiquinol-cytochrome c reductase, Rieske iron-sulfur polypeptide 1	cytochrome b-c1 complex subunit Rieske, mitochondrial|Rieske iron-sulfur protein|Rieske protein UQCRFS1|complex III subunit 5|cytochrome b-c1 complex subunit 5|ubiquinol-cytochrome c reductase iron-sulfur subunit	NM_006003.2	NP_005994.2	NC_000019.10	protein-coding	VALIDATED	19	-	29207259	29213228	Reference GRCh38.p12 Primary Assembly
hsa-mir-497_25g	NM_001291415.1	2	1402.7	840.9	4.03e-06	0.000222	7	7	0	8.5	1	0	20	240	8	0	271.9	0	0	21	5941	1	20	5907	5926	20	20	0	read	NM_001291415.1	9606	7403	KDM6A	KABUK2|UTX|bA386N14.2	lysine demethylase 6A	lysine-specific demethylase 6A|bA386N14.2 (ubiquitously transcribed X chromosome tetratricopeptide repeat protein (UTX))|histone demethylase UTX|lysine (K)-specific demethylase 6A|ubiquitously transcribed tetratricopeptide repeat protein X-linked|ubiquitously-transcribed TPR gene on the X chromosome	NM_001291415.1	NP_001278344.1	NC_000023.11	protein-coding	REVIEWED	X	+	44873174	45112611	Reference GRCh38.p12 Primary Assembly
hsa-mir-497_25g	NM_007126.3	1	707.5	707.5	2.61e-05	0.000695	5	5	0	12	1	0	9	248	0	0	211.5	0	0	21	3859	12	20	734	742	9	9	0	read	NM_007126.3	9606	7415	VCP	CDC48|TERA|p97	valosin containing protein	transitional endoplasmic reticulum ATPase|15S Mg(2+)-ATPase p97 subunit|TER ATPase	NM_007126.4	NP_009057.1	NC_000009.12	protein-coding	REVIEWED	9	-	35056063	35072741	Reference GRCh38.p12 Primary Assembly
hsa-mir-497_25g	NM_001330574.1	1	797.8	797.8	0.00301	0.0334	7	13	3.33e-16	10.5	1	0	13	240	0	0	229.8	0	0	21	4564	8	20	4049	4061	13	13	0	read	NM_001330574.1	9606	7552	ZNF711	CMPX1|MRX97|ZNF4|ZNF5|ZNF6|Zfp711|dJ75N13.1	zinc finger protein 711	zinc finger protein 711|dJ75N13.1 (znf6-like)|zinc finger protein 6 (CMPX1)	NM_001330574.1	NP_001317503.1	NC_000023.11	protein-coding	REVIEWED	X	+	85243819	85273361	Reference GRCh38.p12 Primary Assembly
hsa-mir-497_25g	NM_001348424.1	3	1689.7	599.5	0.0144	0.0431	1	3	0.0122	9.5	1	0	18	240	8	0	271.5	0	0	21	9890	3	20	5108	5125	18	18	0	read	NM_001348424.1	9606	7707	ZNF148	BERF-1|BFCOL1|GDACCF|HT-BETA|ZBP-89|ZFP148|pHZ-52	zinc finger protein 148	zinc finger protein 148|CACCC box-binding protein|CLL-associated antigen KW-10|transcription factor ZBP-89|zinc finger DNA-binding protein 89	NM_001348424.1	NP_001335353.1	NC_000003.12	protein-coding	REVIEWED	3	-	125225668	125375353	Reference GRCh38.p12 Primary Assembly
hsa-mir-497_25g	NR_144687.1	1	715.8	715.8	4.7e-05	0.00106	3	3	2.18e-14	6.5	1	1	17	240	44	0	262.8	0	0	21	3731	4	20	1957	1972	17	16	0	read	NR_144687.1	9606	7738	ZNF184	kr-ZNF3	zinc finger protein 184	zinc finger protein 184|zinc finger protein 184 (Kruppel-like)	NR_144687.1	-	NC_000006.12	protein-coding	REVIEWED	6	-	27404009	27473117	Reference GRCh38.p12 Primary Assembly
hsa-mir-497_25g	NM_007156.4	1	664	664	0.000915	0.0135	4	4	0	8.5	1	0	16	240	0	0	209	0	0	21	5204	5	20	4046	4061	16	16	0	read	NM_007156.4	9606	7789	ZXDA	ZNF896	zinc finger X-linked duplicated A	zinc finger X-linked protein ZXDA|zinc finger protein 896	NM_007156.4	NP_009087.1	NC_000023.11	protein-coding	REVIEWED	X	-	57905429	57910632	Reference GRCh38.p12 Primary Assembly
hsa-mir-497_25g	NM_005670.3	1	680.9	680.9	0.0158	0.0277	4	4	0	9	1	0	15	248	0	0	219.9	0	0	21	3474	6	20	2545	2559	15	15	0	read	NM_005670.3	9606	7957	EPM2A	EPM2|MELF	EPM2A, laforin glucan phosphatase	laforin|LAFPTPase|epilepsy, progressive myoclonus type 2, Lafora disease (laforin)|epilepsy, progressive myoclonus type 2A, Lafora disease (laforin)|glucan phosphatase|glycogen phosphatase|lafora PTPase	NM_005670.3	NP_005661.1	NC_000006.12	protein-coding	REVIEWED	6	-	145382539	145736020	Reference GRCh38.p12 Primary Assembly
hsa-mir-497_25g	NM_006015.5	2	1065.9	570.7	0.00521	0.0363	2	3	4.77e-07	11	1	0	14	240	0	0	207.7	0	0	21	8583	7	20	3073	3086	14	14	0	read	NM_006015.5	9606	8289	ARID1A	B120|BAF250|BAF250a|BM029|C1orf4|CSS2|ELD|MRD14|OSA1|P270|SMARCF1|hELD|hOSA1	AT-rich interaction domain 1A	AT-rich interactive domain-containing protein 1A|ARID domain-containing protein 1A|AT rich interactive domain 1A (SWI-like)|BRG1-associated factor 250a|OSA1 nuclear protein|SWI-like protein|SWI/SNF complex protein p270|SWI/SNF-related, matrix-associated, actin-dependent regulator of chromatin subfamily F member 1|brain protein 120|chromatin remodeling factor p250|osa homolog 1	NM_006015.5	NP_006006.3	NC_000001.11	protein-coding	REVIEWED	1	+	26696032	26782109	Reference GRCh38.p12 Primary Assembly
hsa-mir-497_25g	NM_001330689.1	2	1413.4	733.4	0.00192	0.015	5	5	0	10	1	0	15	240	0	0	246.4	0	0	21	3772	6	20	1074	1088	15	15	0	read	NM_001330689.1	9606	8394	PIP5K1A	-	phosphatidylinositol-4-phosphate 5-kinase type 1 alpha	phosphatidylinositol 4-phosphate 5-kinase type-1 alpha|68 kDa type I phosphatidylinositol 4-phosphate 5-kinase alpha|PIP5K1-alpha|PIP5KIalpha|phosphatidylinositol 4-phosphate 5-kinase type I alpha|ptdIns(4)P-5-kinase 1 alpha	NM_001330689.1	NP_001317618.1	NC_000001.11	protein-coding	VALIDATED	1	+	151197953	151249535	Reference GRCh38.p12 Primary Assembly
hsa-mir-497_25g	NM_001257197.1	1	1477.5	1477.5	1.06e-11	1.05e-09	24	24	0	9	1	1	13	240	0	0	235.5	0	0	21	6592	8	20	2216	2227	13	12	0	read	NM_001257197.1	9606	8452	CUL3	CUL-3|PHA2E	cullin 3	cullin-3	NM_001257197.1	NP_001244126.1	NC_000002.12	protein-coding	REVIEWED	2	-	224470149	224585396	Reference GRCh38.p12 Primary Assembly
hsa-mir-497_25g	NM_001198915.1	2	1019.1	539.2	0.00882	0.0319	1	1	6.54e-06	11	1	0	13	240	0	0	218.2	0	0	21	5807	8	20	3051	3063	13	13	0	read	NM_001198915.1	9606	8496	PPFIBP1	L2|SGT2|hSGT2|hSgt2p	PPFIA binding protein 1	liprin-beta-1|PTPRF interacting protein, binding protein 1 (liprin beta 1)|PTPRF-interacting protein-binding protein 1|liprin related protein|protein-tyrosine phosphatase receptor-type f polypeptide-interacting protein-binding protein 1	NM_001198915.1	NP_001185844.1	NC_000012.12	protein-coding	REVIEWED	12	+	27524111	27695563	Reference GRCh38.p12 Primary Assembly
hsa-mir-497_25g	NM_001316354.1	1	588.9	588.9	0.00301	0.0112	1	1	6.54e-06	5.5	1	0	20	248	12	0	221.9	0	0	21	1952	1	20	492	511	20	20	0	read	NM_001316354.1	9606	8533	COPS3	CSN3|SGN3	COP9 signalosome subunit 3	COP9 signalosome complex subunit 3|COP9 complex subunit 3|COP9 constitutive photomorphogenic homolog subunit 3|JAB1-containing signalosome subunit 3|signalosome subunit 3	NM_001316354.1	NP_001303283.1	NC_000017.11	protein-coding	REVIEWED	17	-	17246623	17281302	Reference GRCh38.p12 Primary Assembly
hsa-mir-497_25g	NM_001142930.1	1	613	613	0.00668	0.0372	3	3	2.18e-14	10	1	0	13	240	0	0	201	0	0	21	3782	8	20	1836	1848	13	13	0	read	NM_001142930.1	9606	8539	API5	AAC-11|AAC11	apoptosis inhibitor 5	apoptosis inhibitor 5|FIF|antiapoptosis clone 11 protein|cell migration-inducing gene 8 protein|fibroblast growth factor 2-interacting factor 2|migration-inducing protein MIG8	NM_001142930.1	NP_001136402.1	NC_000011.10	protein-coding	REVIEWED	11	+	43311954	43344529	Reference GRCh38.p12 Primary Assembly
hsa-mir-497_25g	NM_006769.3	1	705.6	705.6	0.00176	0.0103	5	5	0	7	1	1	17	312	16	0	126.6	0	0	21	5415	5	21	425	440	17	16	0	read	NM_006769.3	9606	8543	LMO4	-	LIM domain only 4	LIM domain transcription factor LMO4|LIM domain only protein 4|LIM-only 4 protein|LMO-4|breast tumor autoantigen	NM_006769.3	NP_006760.1	NC_000001.11	protein-coding	REVIEWED	1	+	87328467	87348922	Reference GRCh38.p12 Primary Assembly
hsa-mir-497_25g	NM_003668.3	1	522.7	522.7	0.0045	0.0107	1	1	6.54e-06	9.5	1	0	13	248	0	0	179.7	0	0	21	2307	8	20	1438	1450	13	13	0	read	NM_003668.3	9606	8550	MAPKAPK5	MAPKAP-K5|MK-5|MK5|PRAK	mitogen-activated protein kinase-activated protein kinase 5	MAP kinase-activated protein kinase 5|MAPK-activated protein kinase 5|MAPKAP kinase 5|MAPKAPK-5|p38-regulated/activated protein kinase	NM_003668.3	NP_003659.2	NC_000012.12	protein-coding	REVIEWED	12	+	111841977	111902224	Reference GRCh38.p12 Primary Assembly
hsa-mir-497_25g	NM_001077181.2	1	577.6	577.6	0.00262	0.0118	1	1	6.54e-06	9	1	0	18	240	16	0	239.6	0	0	21	5209	3	20	431	448	18	18	0	read	NM_001077181.2	9606	8555	CDC14B	CDC14B3|Cdc14B1|Cdc14B2|hCDC14B	cell division cycle 14B	dual specificity protein phosphatase CDC14B|CDC14 cell division cycle 14 homolog B	NM_001077181.2	NP_001070649.1	NC_000009.12	protein-coding	REVIEWED	9	-	96492742	96619829	Reference GRCh38.p12 Primary Assembly
hsa-mir-497_25g	NM_001321541.1	1	666.2	666.2	0.000795	0.0073	4	4	0	11	1	0	14	240	0	0	224.2	0	0	21	2129	7	20	404	417	14	14	0	read	NM_001321541.1	9606	8560	DEGS1	DEGS|DEGS-1|DES1|Des-1|FADS7|MIG15|MLD	delta 4-desaturase, sphingolipid 1	sphingolipid delta(4)-desaturase DES1|cell migration-inducing gene 15 protein|degenerative spermatocyte homolog 1, lipid desaturase|degenerative spermatocyte homolog, lipid desaturase|dihydroceramide desaturase 1|membrane fatty acid (lipid) desaturase|membrane lipid desaturase|migration-inducing gene 15 protein|sphingolipid delta 4 desaturase|sphingolipid delta(4)-desaturase 1	NM_001321541.1	NP_001308470.1	NC_000001.11	protein-coding	VALIDATED	1	+	224183207	224193440	Reference GRCh38.p12 Primary Assembly
hsa-mir-497_25g	NM_001029851.2	1	614.6	614.6	0.00654	0.0372	2	2	3.54e-10	7.5	1	0	21	312	4	0	169.6	0	0	21	4114	1	21	1598	1618	21	21	0	read	NM_001029851.2	9606	8622	PDE8B	ADSD|PPNAD3	phosphodiesterase 8B	high affinity cAMP-specific and IBMX-insensitive 3',5'-cyclic phosphodiesterase 8B|3',5' cyclic nucleotide phosphodiesterase 8B|cell proliferation-inducing gene 22 protein	NM_001029851.2	NP_001025022.1	NC_000005.10	protein-coding	REVIEWED	5	+	77180251	77428255	Reference GRCh38.p12 Primary Assembly
hsa-mir-497_25g	NM_001243736.1	2	1333.7	821.5	3.6e-05	0.00149	7	7	0	7.5	1	0	19	248	12	0	220.5	0	0	21	4259	2	20	934	952	19	19	0	read	NM_001243736.1	9606	8649	LAMTOR3	MAP2K1IP1|MAPBP|MAPKSP1|MP1|PRO0633|Ragulator3	late endosomal/lysosomal adaptor, MAPK and MTOR activator 3	ragulator complex protein LAMTOR3|MAPK scaffold protein 1|MEK binding partner 1|late endosomal/lysosomal adaptor and MAPK and MTOR activator 3|mitogen-activated protein kinase kinase 1 interacting protein 1|mitogen-activated protein kinase scaffold protein 1	NM_001243736.1	NP_001230665.1	NC_000004.12	protein-coding	REVIEWED	4	-	99878337	99894545	Reference GRCh38.p12 Primary Assembly
hsa-mir-497_25g	NM_003749.2	1	540.5	540.5	0.00418	0.021	1	1	6.54e-06	7	1	1	20	160	40	0	258.5	0	0	21	7014	1	20	5569	5587	20	19	0	read	NM_003749.2	9606	8660	IRS2	IRS-2	insulin receptor substrate 2	insulin receptor substrate 2	NM_003749.2	NP_003740.2	NC_000013.11	protein-coding	REVIEWED	13	-	109753836	109786566	Reference GRCh38.p12 Primary Assembly
hsa-mir-497_25g	NM_003875.2	1	578.3	578.3	0.00483	0.0214	1	1	6.54e-06	9.5	1	0	19	240	8	0	250.3	0	0	21	2457	2	20	1855	1873	19	19	0	read	NM_003875.2	9606	8833	GMPS	GATD7	guanine monophosphate synthase	GMP synthase [glutamine-hydrolyzing]|GMP synthase|GMP synthetase|MLL/GMPS fusion protein|glutamine amidotransferase|guanine monophosphate synthetase|guanosine 5'-monophosphate synthase|testicular tissue protein Li 82	NM_003875.2	NP_003866.1	NC_000003.12	protein-coding	REVIEWED	3	+	155869429	155943678	Reference GRCh38.p12 Primary Assembly
hsa-mir-497_25g	NM_001308043.1	3	1175.6	575.5	0.000625	0.00501	1	2	0.00175	10	1	0	15	240	0	0	246.5	0	0	21	4718	6	20	1159	1173	15	15	0	read	NM_001308043.1	9606	8837	CFLAR	CASH|CASP8AP1|CLARP|Casper|FLAME|FLAME-1|FLAME1|FLIP|I-FLICE|MRIT|c-FLIP|c-FLIPL|c-FLIPR|c-FLIPS	CASP8 and FADD like apoptosis regulator	CASP8 and FADD-like apoptosis regulator|FADD-like antiapoptotic molecule 1|MACH-related inducer of toxicity|caspase homolog|caspase-eight-related protein|caspase-like apoptosis regulatory protein|caspase-related inducer of apoptosis|cellular FLICE-like inhibitory protein|inhibitor of FLICE|testis secretory sperm-binding protein Li 233m|usurpin beta	NM_001308043.1	NP_001294972.1	NC_000002.12	protein-coding	REVIEWED	2	+	201116103	201172687	Reference GRCh38.p12 Primary Assembly
hsa-mir-497_25g	NM_001113407.2	1	531.3	531.3	0.016	0.046	1	1	6.54e-06	13	1	0	9	240	0	0	212.3	0	0	21	3217	12	20	2919	2927	9	9	0	read	NM_001113407.2	9606	8861	LDB1	CLIM-2|CLIM2|LDB-1|NLI	LIM domain binding 1	LIM domain-binding protein 1|LIM domain-binding factor CLIM2|LIM domain-binding factor-1|carboxy terminal LIM domain protein 2|carboxyl-terminal LIM domain-binding protein 2|nuclear LIM interactor	NM_001113407.2	NP_001106878.1	NC_000010.11	protein-coding	VALIDATED	10	-	102102099	102120472	Reference GRCh38.p12 Primary Assembly
hsa-mir-497_25g	NM_003906.4	1	319.4	319.4	0.113	0.138	1	1	6.54e-06	8	1	0	14	168	0	0	46.4	0	0	21	6198	8	21	4946	4959	14	14	12	read	NM_003906.4	9606	8888	MCM3AP	GANP|MAP80|SAC3	minichromosome maintenance complex component 3 associated protein	germinal-center associated nuclear protein|80 kDa MCM3-associated protein|MCM3 acetylating protein|MCM3 acetyltransferase|MCM3 import protein|MCM3 minichromosome maintenance deficient 3 associated protein|germinal center-associated nuclear protein|germinal-centre associated nuclear protein	NM_003906.4	NP_003897.2	NC_000021.9	protein-coding	REVIEWED	21	-	46235124	46286296	Reference GRCh38.p12 Primary Assembly
hsa-mir-497_25g	NM_001099400.1	1	920.1	920.1	1.7e-05	0.000925	9	9	0	9	1	0	15	320	0	0	184.1	0	0	21	1717	7	21	1122	1136	15	15	0	read	NM_001099400.1	9606	8910	SGCE	DYT11|ESG|epsilon-SG	sarcoglycan epsilon	epsilon-sarcoglycan|dystonia 11, myoclonic	NM_001099400.1	NP_001092870.1	NC_000007.14	protein-coding	REVIEWED	7	-	94585223	94656208	Reference GRCh38.p12 Primary Assembly
hsa-mir-497_25g	NM_003927.4	1	587.7	587.7	0.00442	0.0299	2	2	3.54e-10	11.5	1	0	13	240	0	0	226.7	0	0	21	5190	8	20	3554	3566	13	13	0	read	NM_003927.4	9606	8932	MBD2	DMTase|NY-CO-41	methyl-CpG binding domain protein 2	methyl-CpG-binding domain protein 2|demethylase	NM_003927.4	NP_003918.1	NC_000018.10	protein-coding	REVIEWED	18	-	54151600	54224787	Reference GRCh38.p12 Primary Assembly
hsa-mir-497_25g	NM_001267580.1	1	649.5	649.5	0.0209	0.0337	3	3	2.18e-14	10	1	0	15	240	0	0	243.5	0	0	21	2965	6	20	1296	1310	15	15	0	read	NM_001267580.1	9606	9055	PRC1	ASE1	protein regulator of cytokinesis 1	protein regulator of cytokinesis 1|anaphase spindle elongation 1 homolog|protein regulating cytokinesis 1	NM_001267580.1	NP_001254509.1	NC_000015.10	protein-coding	REVIEWED	15	-	90966037	90994650	Reference GRCh38.p12 Primary Assembly
hsa-mir-497_25g	NM_001142415.1	1	536.9	536.9	0.00836	0.0243	1	1	6.54e-06	10	1	0	17	240	0	0	214.9	0	0	21	2537	4	20	1519	1535	17	17	0	read	NM_001142415.1	9606	9255	AIMP1	EMAP2|EMAPII|HLD3|SCYE1|p43	aminoacyl tRNA synthetase complex interacting multifunctional protein 1	aminoacyl tRNA synthase complex-interacting multifunctional protein 1|ARS-interacting multifunctional protein 1|endothelial monocyte-activating polypeptide 2|endothelial-monocyte activating polypeptide II|multisynthase complex auxiliary component p43|multisynthetase complex auxiliary component p43|small inducible cytokine subfamily E, member 1 (endothelial monocyte-activating)	NM_001142415.1	NP_001135887.1	NC_000004.12	protein-coding	REVIEWED	4	+	106315609	106349224	Reference GRCh38.p12 Primary Assembly
hsa-mir-497_25g	NM_001284215.2	1	672.1	672.1	4.37e-05	0.000915	1	1	6.54e-06	12	1	0	10	312	0	0	275.1	0	0	21	9974	12	21	4331	4340	10	10	0	read	NM_001284215.2	9606	9320	TRIP12	MRD49|TRIP-12|ULF	thyroid hormone receptor interactor 12	E3 ubiquitin-protein ligase TRIP12|E3 ubiquitin-protein ligase for Arf|HECT-type E3 ubiquitin transferase TRIP12|TR-interacting protein 12|probable E3 ubiquitin-protein ligase TRIP12|thyroid receptor interacting protein 12	NM_001284215.2	NP_001271144.1	NC_000002.12	protein-coding	REVIEWED	2	-	229763836	229923233	Reference GRCh38.p12 Primary Assembly
hsa-mir-497_25g	NM_004864.3	1	556	556	0.0065	0.0395	1	1	6.54e-06	6	1	1	21	312	12	0	139	0	0	21	1417	2	21	845	865	20	21	0	read	NM_004864.3	9606	9518	GDF15	GDF-15|MIC-1|MIC1|NAG-1|PDF|PLAB|PTGFB	growth differentiation factor 15	growth/differentiation factor 15|NRG-1|NSAID (nonsteroidal anti-inflammatory drug)-activated protein 1|NSAID-activated gene 1 protein|NSAID-regulated gene 1 protein|PTGF-beta|macrophage inhibitory cytokine 1|non-steroidal anti-inflammatory drug-activated gene-1|placental TGF-beta|placental bone morphogenetic protein|prostate differentiation factor	NM_004864.3	NP_004855.2	NC_000019.10	protein-coding	REVIEWED	19	+	18382169	18389176	Reference GRCh38.p12 Primary Assembly
hsa-mir-497_25g	NM_001330257.1	2	1214.7	683.5	3.22e-05	0.000739	5	5	0	7.5	1	0	20	240	8	0	180.5	0	0	21	4145	1	20	2687	2706	20	20	0	read	NM_001330257.1	9606	9520	NPEPPS	AAP-S|MP100|PSA	aminopeptidase puromycin sensitive	puromycin-sensitive aminopeptidase|cytosol alanyl aminopeptidase|metalloproteinase MP100	NM_001330257.1	NP_001317186.1	NC_000017.11	protein-coding	REVIEWED	17	+	47522949	47623275	Reference GRCh38.p12 Primary Assembly
hsa-mir-497_25g	NM_001206802.2	1	544.8	544.8	0.00817	0.0317	1	2	0.00175	8	1	0	16	312	0	0	131.8	0	0	21	961	6	21	690	705	16	16	0	read	NM_001206802.2	9606	9540	TP53I3	PIG3	tumor protein p53 inducible protein 3	quinone oxidoreductase PIG3|p53-induced gene 3 protein|quinone oxidoreductase homolog	NM_001206802.2	NP_001193731.1	NC_000002.12	protein-coding	REVIEWED	2	-	24077427	24085766	Reference GRCh38.p12 Primary Assembly
hsa-mir-497_25g	NM_001267843.1	1	578.5	578.5	0.0014	0.0107	1	1	6.54e-06	7.5	1	1	19	240	12	0	247.5	0	0	21	10981	2	20	9105	9122	19	18	0	read	NM_001267843.1	9606	9575	CLOCK	KAT13D|bHLHe8	clock circadian regulator	circadian locomoter output cycles protein kaput|circadian locomoter output cycles kaput protein|class E basic helix-loop-helix protein 8|clock homolog	NM_001267843.1	NP_001254772.1	NC_000004.12	protein-coding	REVIEWED	4	-	55427900	55547137	Reference GRCh38.p12 Primary Assembly
hsa-mir-497_25g	NM_001130848.1	1	782.7	782.7	0.000377	0.00624	5	5	0	6	1	0	18	240	84	0	191.7	0	0	21	4245	3	20	241	258	18	18	0	read	NM_001130848.1	9606	9600	PITPNM1	DRES9|NIR2|PITPNM|RDGB|RDGB1|RDGBA|RDGBA1|Rd9	phosphatidylinositol transfer protein membrane associated 1	membrane-associated phosphatidylinositol transfer protein 1|NIR-2|PITPnm 1|PYK2 N-terminal domain-interacting receptor 2|drosophila retinal degeneration B homolog|retinal degeneration B alpha 1	NM_001130848.1	NP_001124320.1	NC_000011.10	protein-coding	VALIDATED	11	-	67491759	67505371	Reference GRCh38.p12 Primary Assembly
hsa-mir-497_25g	NM_001278312.1	1	1963.3	1963.3	2.38e-08	2.45e-06	35	35	0	9	1	0	20	244	12	0	264.3	0	0	21	4408	2	21	3347	3366	20	20	0	read	NM_001278312.1	9606	9631	NUP155	ATFB15|N155	nucleoporin 155	nuclear pore complex protein Nup155|155 kDa nucleoporin|nucleoporin 155kD|nucleoporin 155kDa	NM_001278312.1	NP_001265241.1	NC_000005.10	protein-coding	REVIEWED	5	-	37291632	37371125	Reference GRCh38.p12 Primary Assembly
hsa-mir-497_25g	NM_001346279.1	2	2000.8	1467.7	2.18e-11	3.52e-09	24	24	0	8.5	1	0	19	240	8	0	208.7	0	0	21	4526	2	20	1569	1587	19	19	0	read	NM_001346279.1	9606	9646	CTR9	SH2BP1|TSBP|p150|p150TSP	CTR9 homolog, Paf1/RNA polymerase II complex component	RNA polymerase-associated protein CTR9 homolog|Ctr9, Paf1/RNA polymerase II complex component, homolog|SH2 domain binding protein 1 (tetratricopeptide repeat containing)|TPR-containing, SH2-binding phosphoprotein	NM_001346279.1	NP_001333208.1	NC_000011.10	protein-coding	REVIEWED	11	+	10750986	10779754	Reference GRCh38.p12 Primary Assembly
hsa-mir-497_25g	NM_181453.3	2	1138	643	0.00224	0.0109	4	4	0	11	1	0	15	240	0	0	202	0	0	21	6998	6	20	5433	5447	15	15	0	read	NM_181453.3	9606	9648	GCC2	GCC185|RANBP2L4|REN53	GRIP and coiled-coil domain containing 2	GRIP and coiled-coil domain-containing protein 2|185 kDa Golgi coiled-coil protein|CLL-associated antigen KW-11|CTCL tumor antigen se1-1|GCC protein, 185-kD|Golgi coiled-coil protein GCC185|Ran-binding protein 2-like 4|renal carcinoma antigen NY-REN-53	NM_181453.3	NP_852118.1	NC_000002.12	protein-coding	REVIEWED	2	+	108448560	108509397	Reference GRCh38.p12 Primary Assembly
hsa-mir-497_25g	NM_014654.3	1	519.7	519.7	0.0212	0.0365	1	2	0.00175	11	1	0	14	240	0	0	197.7	0	0	21	5121	7	20	1237	1250	14	14	0	read	NM_014654.3	9606	9672	SDC3	SDCN|SYND3	syndecan 3	syndecan-3|N-syndecan|syndecan neural type|syndecan proteoglycan 3	NM_014654.3	NP_055469.3	NC_000001.11	protein-coding	REVIEWED	1	-	30869465	30909734	Reference GRCh38.p12 Primary Assembly
hsa-mir-497_25g	NM_001303457.1	1	4084.8	4084.8	0	0	87	87	0	5.5	1	1	20	240	12	0	304.8	0	0	21	3842	1	20	610	628	20	19	0	read	NM_001303457.1	9606	9675	TTI1	KIAA0406|smg-10	TELO2 interacting protein 1	TELO2-interacting protein 1 homolog|TEL2-interacting protein 1 homolog|Tel two interacting protein 1|smg-10 homolog, nonsense mediated mRNA decay factor	NM_001303457.1	NP_001290386.1	NC_000020.11	protein-coding	VALIDATED	20	-	37983006	38033467	Reference GRCh38.p12 Primary Assembly
hsa-mir-497_25g	NM_001195555.1	1	756.6	756.6	0.00193	0.0152	7	7	0	9	1	0	18	240	40	0	147.6	0	0	21	4061	3	20	1439	1456	18	18	0	read	NM_001195555.1	9606	9685	CLINT1	CLINT|ENTH|EPN4|EPNR	clathrin interactor 1	clathrin interactor 1|clathrin interacting protein localized in the trans-Golgi region|enthoprotin|epsin 4|epsin-related protein|epsinR	NM_001195555.1	NP_001182484.1	NC_000005.10	protein-coding	REVIEWED	5	-	157785742	157859174	Reference GRCh38.p12 Primary Assembly
hsa-mir-497_25g	NM_001207068.2	1	11784.6	11784.6	0	0	281	283	0	7.5	1	0	20	240	16	0	234.6	0	0	21	3121	1	20	1142	1161	20	20	0	read	NM_001207068.2	9606	9689	BZW1	BZAP45|Nbla10236	basic leucine zipper and W2 domains 1	basic leucine zipper and W2 domain-containing protein 1|basic leucine-zipper protein BZAP45|putative protein product of Nbla10236	NM_001207068.2	NP_001193997.1	NC_000002.12	protein-coding	VALIDATED	2	+	200811545	200823850	Reference GRCh38.p12 Primary Assembly
hsa-mir-497_25g	NM_014671.2	1	712.9	712.9	0.00122	0.00936	5	7	3.33e-16	13	1	0	9	240	0	0	233.9	0	0	21	5195	12	20	4059	4067	9	9	0	read	NM_014671.2	9606	9690	UBE3C	HECTH2	ubiquitin protein ligase E3C	ubiquitin-protein ligase E3C|HECT-type ubiquitin transferase E3C|ubiquitin-protein isopeptide ligase (E3)	NM_014671.2	NP_055486.2	NC_000007.14	protein-coding	VALIDATED	7	+	157138951	157269371	Reference GRCh38.p12 Primary Assembly
hsa-mir-497_25g	NM_001020658.1	1	869.5	869.5	3.49e-07	1.96e-05	8	13	0	6	1	1	21	252	8	0	243.5	0	0	21	5416	1	21	3123	3142	21	20	0	read	NM_001020658.1	9606	9698	PUM1	HSPUM|PUMH|PUMH1|PUML1|SCA47	pumilio RNA binding family member 1	pumilio homolog 1|pumilio-1	NM_001020658.1	NP_001018494.1	NC_000001.11	protein-coding	REVIEWED	1	-	30931505	31065716	Reference GRCh38.p12 Primary Assembly
hsa-mir-497_25g	NM_001145642.4	5	2757.4	772.7	0.0079	0.026	7	7	0	9	1	1	14	240	0	0	211.7	0	0	21	9481	7	20	825	837	14	13	0	read	NM_001145642.4	9606	9711	RUBCN	KIAA0226|RUBICON|SCAR15	RUN and cysteine rich domain containing beclin 1 interacting protein	run domain Beclin-1-interacting and cysteine-rich domain-containing protein|RUN domain and cysteine-rich domain containing, Beclin 1-interacting protein|baron|beclin-1 associated RUN domain containing protein|rundataxin	NM_001145642.4	NP_001139114.1	NC_000003.12	protein-coding	REVIEWED	3	-	197668866	197749726	Reference GRCh38.p12 Primary Assembly
hsa-mir-497_25g	NM_014691.2	1	618.8	618.8	3.05e-05	0.000742	2	2	3.54e-10	6.5	1	1	21	240	8	0	249.8	0	0	21	5106	1	20	3290	3310	20	21	0	read	NM_014691.2	9606	9716	AQR	IBP160|fSAP164	aquarius intron-binding spliceosomal factor	RNA helicase aquarius|aquarius homolog|functional spliceosome-associated protein 164|intron-binding protein aquarius|intron-binding protein of 160 kDa	NM_014691.2	NP_055506.1	NC_000015.10	protein-coding	VALIDATED	15	-	34856350	34969793	Reference GRCh38.p12 Primary Assembly
hsa-mir-497_25g	NM_001171904.1	3	1192.9	586.9	0.0312	0.052	1	1	6.54e-06	8	1	0	20	240	12	0	251.9	0	0	21	5951	1	20	602	621	20	20	0	read	NM_001171904.1	9606	9730	DCAF1	RIP|VPRBP	DDB1 and CUL4 associated factor 1	DDB1- and CUL4-associated factor 1|HIV-1 Vpr-binding protein|Vpr (HIV-1) binding protein|Vpr-binding protein|protein VPRBP|serine/threonine-protein kinase VPRBP|vpr-interacting protein	NM_001171904.1	NP_001165375.1	NC_000003.12	protein-coding	VALIDATED	3	-	51394260	51505619	Reference GRCh38.p12 Primary Assembly
hsa-mir-497_25g	NM_001029989.2	1	578.5	578.5	0.00169	0.00632	1	2	0.00175	8	1	1	20	240	4	0	252.5	0	0	21	1352	2	20	625	644	19	20	0	read	NM_001029989.2	9606	9768	PCLAF	KIAA0101|L5|NS5ATP9|OEATC|OEATC-1|OEATC1|PAF|PAF15|p15(PAF)|p15/PAF|p15PAF	PCNA clamp associated factor	PCNA-associated factor|HCV NS5A-transactivated protein 9|PCNA-associated factor of 15 kDa|hepatitis C virus NS5A-transactivated protein 9|overexpressed in anaplastic thyroid carcinoma 1	NM_001029989.2	NP_001025160.1	NC_000015.10	protein-coding	VALIDATED	15	-	64364993	64387686	Reference GRCh38.p12 Primary Assembly
hsa-mir-497_25g	NM_014003.3	3	1542.9	573.3	0.00126	0.0105	1	1	6.54e-06	11	1	0	11	240	0	0	244.3	0	0	21	4470	10	20	2427	2437	11	11	0	read	NM_014003.3	9606	9785	DHX38	DDX38|PRP16|PRPF16	DEAH-box helicase 38	pre-mRNA-splicing factor ATP-dependent RNA helicase PRP16|ATP-dependent RNA helicase DHX38|DEAD/H (Asp-Glu-Ala-Asp/His) box polypeptide 38|DEAH (Asp-Glu-Ala-His) box polypeptide 38|DEAH box protein 38|PRP16 homolog of S.cerevisiae	NM_014003.3	NP_054722.2	NC_000016.10	protein-coding	REVIEWED	16	+	72093664	72112911	Reference GRCh38.p12 Primary Assembly
hsa-mir-497_25g	NM_001145513.1	1	530	530	0.00952	0.0181	1	1	6.54e-06	10	1	0	14	252	0	0	186	0	0	21	5286	8	21	696	709	14	14	0	read	NM_001145513.1	9606	9805	SCRN1	SES1	secernin 1	secernin-1	NM_001145513.1	NP_001138985.1	NC_000007.14	protein-coding	REVIEWED	7	-	29920102	29990288	Reference GRCh38.p12 Primary Assembly
hsa-mir-497_25g	NM_001168370.1	1	527.6	527.6	0.0122	0.0215	1	1	6.54e-06	6.5	1	1	17	252	24	0	154.6	0	0	21	5527	5	21	142	157	17	16	0	read	NM_001168370.1	9606	9820	CUL7	3M1|CUL-7|KIAA0076|dJ20C7.5	cullin 7	cullin-7	NM_001168370.1	NP_001161842.1	NC_000006.12	protein-coding	REVIEWED	6	-	43037616	43053944	Reference GRCh38.p12 Primary Assembly
hsa-mir-497_25g	NM_001271779.1	1	642.1	642.1	0.00196	0.0134	2	2	3.54e-10	13	1	0	8	312	0	0	206.1	0	0	21	1652	14	21	1360	1367	8	8	0	read	NM_001271779.1	9606	9861	PSMD6	Rpn7|S10|SGA-113M|p42A|p44S10	proteasome 26S subunit, non-ATPase 6	26S proteasome non-ATPase regulatory subunit 6|breast cancer-associated protein SGA-113M|phosphonoformate immuno-associated protein 4|proteasome (prosome, macropain) 26S subunit, non-ATPase, 6|proteasome regulatory particle subunit p44S10	NM_001271779.1	NP_001258708.1	NC_000003.12	protein-coding	REVIEWED	3	-	64010548	64024009	Reference GRCh38.p12 Primary Assembly
hsa-mir-497_25g	NM_014840.2	1	526.7	526.7	0.00206	0.00761	1	1	6.54e-06	12	1	0	12	240	0	0	204.7	0	0	21	6821	9	20	4387	4398	12	12	0	read	NM_014840.2	9606	9891	NUAK1	ARK5	NUAK family kinase 1	NUAK family SNF1-like kinase 1|AMP-activated protein kinase family member 5|AMPK-related protein kinase 5|NUAK family, SNF1-like kinase, 1|omphalocele kinase 1	NM_014840.2	NP_055655.1	NC_000012.12	protein-coding	VALIDATED	12	-	106063346	106140032	Reference GRCh38.p12 Primary Assembly
hsa-mir-497_25g	NM_001243764.1	1	561.6	561.6	0.0023	0.00754	1	1	6.54e-06	9	1	0	16	240	0	0	231.6	0	0	21	6266	5	20	5311	5326	16	16	0	read	NM_001243764.1	9606	9910	RABGAP1L	HHL|TBC1D18	RAB GTPase activating protein 1 like	rab GTPase-activating protein 1-like|TBC1 domain family, member 18|expressed in hematopoietic cells, heart, liver (HLL)	NM_001243764.1	NP_001230693.1	NC_000001.11	protein-coding	VALIDATED	1	+	174159413	174995307	Reference GRCh38.p12 Primary Assembly
hsa-mir-497_25g	NM_001330447.1	2	484.1	363.7	0.07	0.0861	1	1	6.54e-06	4.5	1	0	18	168	36	0	38.7	0	0	21	13851	4	21	5757	5774	18	18	15.5	read	NM_001330447.1	9606	9931	HELZ	DHRC|DRHC|HUMORF5	helicase with zinc finger	probable helicase with zinc finger domain|down-regulated in human cancers protein|helicase with zinc finger domain	NM_001330447.1	NP_001317376.1	NC_000017.11	protein-coding	VALIDATED	17	-	67070437	67245988	Reference GRCh38.p12 Primary Assembly
hsa-mir-497_25g	NM_005105.4	1	544.5	544.5	0.00867	0.0244	1	3	0.0122	12	1	0	10	248	0	0	209.5	0	0	21	4974	11	20	2741	2750	10	10	0	read	NM_005105.4	9606	9939	RBM8A	BOV-1A|BOV-1B|BOV-1C|C1DELq21.1|DEL1q21.1|MDS014|RBM8|RBM8B|TAR|Y14|ZNRP|ZRNP1	RNA binding motif protein 8A	RNA-binding protein 8A|BOV-1|RNA binding motif protein 8B|RNA-binding protein Y14|binder of OVCA1-1|ribonucleoprotein RBM8|ribonucleoprotein RBM8A	NM_005105.4	NP_005096.1	NC_000001.11	protein-coding	REVIEWED	1	-	145921555	145927535	Reference GRCh38.p12 Primary Assembly
hsa-mir-497_25g	NM_005113.3	1	517.5	517.5	0.00575	0.0114	1	1	6.54e-06	8.5	1	0	20	240	12	0	178.5	0	0	21	2982	1	20	858	877	20	20	0	read	NM_005113.3	9606	9950	GOLGA5	GOLIM5|RFG5|ret-II	golgin A5	golgin subfamily A member 5|RET-fused gene 5 protein|cell proliferation-inducing gene 31 protein|golgi autoantigen, golgin subfamily a, 5|golgi integral membrane protein 5|golgin-84	NM_005113.3	NP_005104.3	NC_000014.9	protein-coding	REVIEWED	14	+	92794230	92839962	Reference GRCh38.p12 Primary Assembly
hsa-mir-497_25g	NM_005746.2	1	998.3	998.3	5.86e-06	0.000354	12	12	0	7.5	1	0	20	240	24	0	200.3	0	0	21	4593	1	20	1323	1342	20	20	0	read	NM_005746.2	9606	10135	NAMPT	1110035O14Rik|PBEF|PBEF1|VF|VISFATIN	nicotinamide phosphoribosyltransferase	nicotinamide phosphoribosyltransferase|NAmPRTase|pre-B cell-enhancing factor|pre-B-cell colony-enhancing factor 1	NM_005746.2	NP_005737.1	NC_000007.14	protein-coding	REVIEWED	7	-	106248284	106285191	Reference GRCh38.p12 Primary Assembly
hsa-mir-497_25g	NM_005778.3	1	613.3	613.3	0.085	0.101	2	2	3.54e-10	13	1	0	8	248	0	0	241.3	0	0	21	3149	13	20	742	749	8	8	0	read	NM_005778.3	9606	10181	RBM5	G15|H37|LUCA15|RMB5	RNA binding motif protein 5	RNA-binding protein 5|putative tumor suppressor LUCA15|renal carcinoma antigen NY-REN-9	NM_005778.3	NP_005769.1	NC_000003.12	protein-coding	REVIEWED	3	+	50088907	50118963	Reference GRCh38.p12 Primary Assembly
hsa-mir-497_25g	NM_001308426.1	1	871.8	871.8	1.1e-05	0.000545	9	9	0	13	1	0	9	240	0	0	232.8	0	0	21	3238	12	20	1549	1557	9	9	0	read	NM_001308426.1	9606	10201	NME6	IPIA-ALPHA|NDK 6|NM23-H6	NME/NM23 nucleoside diphosphate kinase 6	nucleoside diphosphate kinase 6|NDP kinase 6|inhibitor of p53-induced apoptosis-alpha|non-metastatic cells 6, protein expressed in (nucleoside-diphosphate kinase)	NM_001308426.1	NP_001295355.1	NC_000003.12	protein-coding	VALIDATED	3	-	48288401	48302903	Reference GRCh38.p12 Primary Assembly
hsa-mir-497_25g	NM_001321532.1	1	712.3	712.3	9.98e-05	0.00316	3	3	2.18e-14	9	1	0	17	240	40	0	263.3	0	0	21	4987	4	20	1439	1455	17	17	0	read	NM_001321532.1	9606	10208	USPL1	C13orf22|D13S106E|bA121O19.1	ubiquitin specific peptidase like 1	SUMO-specific isopeptidase USPL1|USP-like 1|highly charged protein|ubiquitin-specific peptidase-like protein 1	NM_001321532.1	NP_001308461.1	NC_000013.11	protein-coding	VALIDATED	13	+	30617678	30660769	Reference GRCh38.p12 Primary Assembly
hsa-mir-497_25g	NM_001102397.2	2	1105.5	630.3	0.00616	0.0266	1	1	6.54e-06	7	1	0	19	240	12	0	279.3	0	0	21	7703	2	20	1993	2011	19	19	0	read	NM_001102397.2	9606	10236	HNRNPR	HNRPR|hnRNP-R	heterogeneous nuclear ribonucleoprotein R	heterogeneous nuclear ribonucleoprotein R	NM_001102397.2	NP_001095867.1	NC_000001.11	protein-coding	REVIEWED	1	-	23304687	23344363	Reference GRCh38.p12 Primary Assembly
hsa-mir-497_25g	NM_001017405.2	1	525.1	525.1	0.00801	0.0164	1	1	6.54e-06	11	1	0	14	240	0	0	203.1	0	0	21	2250	7	20	1120	1133	14	14	0	read	NM_001017405.2	9606	10296	MAEA	EMLP|EMP|GID9|HLC-10|PIG5	macrophage erythroblast attacher	macrophage erythroblast attacher|GID complex subunit 9, FYV10 homolog|cell proliferation-inducing gene 5 protein|erythroblast macrophage protein|human lung cancer oncogene 10 protein|lung cancer-related protein 10	NM_001017405.2	NP_001017405.1	NC_000004.12	protein-coding	REVIEWED	4	+	1289850	1340147	Reference GRCh38.p12 Primary Assembly
hsa-mir-497_25g	NM_001270660.1	2	1184.9	605.5	0.00969	0.0259	1	2	0.00175	5	1	0	20	248	8	0	240.5	0	0	21	9566	1	20	1617	1636	20	20	11	read	NM_001270660.1	9606	10299	43530	DOA10|MARCH-VI|RNF176|TEB4	membrane associated ring-CH-type finger 6	E3 ubiquitin-protein ligase MARCH6|RING finger protein 176|RING-type E3 ubiquitin transferase MARCH6|doa10 homolog|membrane associated ring finger 6|membrane-associated RING finger protein 6|membrane-associated RING-CH finger protein 6|membrane-associated RING-CH protein VI|membrane-associated ring finger (C3HC4) 6, E3 ubiquitin protein ligase	NM_001270660.1	NP_001257589.1	NC_000005.10	protein-coding	REVIEWED	5	+	10353638	10440387	Reference GRCh38.p12 Primary Assembly
hsa-mir-497_25g	NM_006082.2	2	2478.7	1640.5	0	0	29	29	0	8	1	0	18	240	12	0	174.5	0	0	21	1771	3	20	1153	1170	18	18	0	read	NM_006082.2	9606	10376	TUBA1B	K-ALPHA-1	tubulin alpha 1b	tubulin alpha-1B chain|alpha tubulin|alpha-tubulin ubiquitous|tubulin K-alpha-1|tubulin alpha-ubiquitous chain|tubulin, alpha, ubiquitous	NM_006082.2	NP_006073.2	NC_000012.12	protein-coding	VALIDATED	12	-	49127781	49131520	Reference GRCh38.p12 Primary Assembly
hsa-mir-497_25g	NM_001197237.1	1	681.6	681.6	7.39e-05	0.00106	5	5	0	6.5	1	0	20	152	36	0	236.6	0	0	21	3621	1	20	280	299	20	20	0	read	NM_001197237.1	9606	10385	BTN2A2	BT2.2|BTF2|BTN2.2	butyrophilin subfamily 2 member A2	butyrophilin subfamily 2 member A2|butyrophilin 2	NM_001197237.1	NP_001184166.1	NC_000006.12	protein-coding	REVIEWED	6	+	26382892	26394873	Reference GRCh38.p12 Primary Assembly
hsa-mir-497_25g	NM_001190456.1	1	820.9	820.9	0.000764	0.011	8	8	0	13	1	0	9	240	0	0	221.9	0	0	21	3344	12	20	3284	3292	9	9	0	read	NM_001190456.1	9606	10391	CORO2B	CLIPINC	coronin 2B	coronin-2B|clipin C|coronin, actin binding protein, 2B|coronin-like protein C	NM_001190456.1	NP_001177385.1	NC_000015.10	protein-coding	VALIDATED	15	+	68518372	68727805	Reference GRCh38.p12 Primary Assembly
hsa-mir-497_25g	NM_006320.4	1	1088.6	1088.6	3.61e-08	2.43e-06	13	13	0	13	1	0	9	240	0	0	289.6	0	0	21	3790	12	20	1880	1888	9	9	0	read	NM_006320.4	9606	10424	PGRMC2	DG6|PMBP	progesterone receptor membrane component 2	membrane-associated progesterone receptor component 2|progesterone membrane binding protein|steroid receptor protein DG6	NM_006320.4	NP_006311.2	NC_000004.12	protein-coding	VALIDATED	4	-	128269236	128288828	Reference GRCh38.p12 Primary Assembly
hsa-mir-497_25g	NM_001317333.1	2	2572.3	1996.4	0	0	37	37	0	13	1	0	9	240	0	0	237.4	0	0	21	4231	12	20	2385	2393	9	9	0	read	NM_001317333.1	9606	10425	ARIH2	ARI2|TRIAD1	ariadne RBR E3 ubiquitin protein ligase 2	E3 ubiquitin-protein ligase ARIH2|RING-type E3 ubiquitin transferase ARIH2|all-trans retinoic acid inducible RING finger|ariadne homolog 2|protein ariadne-2 homolog	NM_001317333.1	NP_001304262.1	NC_000003.12	protein-coding	REVIEWED	3	+	48918819	48985540	Reference GRCh38.p12 Primary Assembly
hsa-mir-497_25g	NM_001242597.1	1	528	528	0.00979	0.0183	1	1	6.54e-06	6	1	1	18	240	16	0	178	0	0	21	980	3	20	504	520	18	17	0	read	NM_001242597.1	9606	10430	TMEM147	NIFIE14	transmembrane protein 147	transmembrane protein 147|protein NIFIE 14|seven transmembrane domain protein	NM_001242597.1	NP_001229526.1	NC_000019.10	protein-coding	VALIDATED	19	+	35545599	35547526	Reference GRCh38.p12 Primary Assembly
hsa-mir-497_25g	NM_001320049.1	1	1053.6	1053.6	1.11e-05	0.00035	14	16	0	7	1	0	20	240	16	0	181.6	0	0	21	922	1	20	655	674	20	20	0	read	NM_001320049.1	9606	10436	EMG1	C2F|Grcc2f|NEP1	EMG1, N1-specific pseudouridine methyltransferase	ribosomal RNA small subunit methyltransferase NEP1|18S rRNA (pseudouridine(1248)-N1)-methyltransferase|18S rRNA (pseudouridine-N1-)-methyltransferase NEP1|18S rRNA Psi1248 methyltransferase|EMG1 nucleolar protein homolog|essential for mitotic growth 1|nucleolar essential protein 1|ribosome biogenesis protein NEP1	NM_001320049.1	NP_001306978.1	NC_000012.12	protein-coding	REVIEWED	12	+	6970780	6997427	Reference GRCh38.p12 Primary Assembly
hsa-mir-497_25g	NM_001014842.2	1	784.9	784.9	1.44e-05	0.000378	7	7	0	6.5	1	0	19	240	12	0	187.9	0	0	21	2193	2	20	595	613	19	19	0	read	NM_001014842.2	9606	10548	TM9SF1	HMP70|MP70	transmembrane 9 superfamily member 1	transmembrane 9 superfamily member 1|MP70 protein family member|multispanning membrane protein (70kD)|transmembrane protein 9 superfamily member 1	NM_001014842.2	NP_001014842.1	NC_000014.9	protein-coding	VALIDATED	14	-	24189142	24195735	Reference GRCh38.p12 Primary Assembly
hsa-mir-497_25g	NM_001166103.1	1	513.2	513.2	0.0147	0.0235	1	1	6.54e-06	7.5	1	1	18	252	8	0	167.2	0	0	21	1646	4	21	748	764	18	17	0	read	NM_001166103.1	9606	10653	SPINT2	DIAR3|HAI-2|HAI2|Kop|PB	serine peptidase inhibitor, Kunitz type 2	kunitz-type protease inhibitor 2|hepatocyte growth factor activator inhibitor type 2|serine protease inhibitor, Kunitz type, 2|testicular tissue protein Li 183	NM_001166103.1	NP_001159575.1	NC_000019.10	protein-coding	REVIEWED	19	+	38264457	38292613	Reference GRCh38.p12 Primary Assembly
hsa-mir-497_25g	NM_006591.2	2	5818.7	5279.3	0	0	119	124	0	8	1	0	19	240	16	0	213.3	0	0	21	3824	2	20	3355	3373	19	19	0	read	NM_006591.2	9606	10714	POLD3	P66|P68|PPP1R128	DNA polymerase delta 3, accessory subunit	DNA polymerase delta subunit 3|DNA polymerase delta subunit C|DNA polymerase delta subunit p66|DNA polymerase delta subunit p68|Pol delta C subunit (p66)|polymerase (DNA) delta 3, accessory subunit|polymerase (DNA-directed), delta 3, accessory subunit|protein phosphatase 1, regulatory subunit 128	NM_006591.2	NP_006582.1	NC_000011.10	protein-coding	REVIEWED	11	+	74592529	74669340	Reference GRCh38.p12 Primary Assembly
hsa-mir-497_25g	NM_006662.2	1	545.5	545.5	0.0164	0.03	1	1	6.54e-06	9	1	0	19	240	8	0	212.5	0	0	21	10491	2	20	7279	7297	19	19	0	read	NM_006662.2	9606	10847	SRCAP	DOMO1|EAF1|FLHS|SWR1	Snf2 related CREBBP activator protein	helicase SRCAP|Snf2-related CBP activator protein|Swi2/Snf2-related ATPase homolog, domino homolog 1|domino homolog 2	NM_006662.2	NP_006653.2	NC_000016.10	protein-coding	REVIEWED	16	+	30699140	30740128	Reference GRCh38.p12 Primary Assembly
hsa-mir-497_25g	NM_006784.2	1	3471.2	3471.2	0	0	74	74	0	12	1	0	9	248	0	0	215.2	0	0	21	3877	12	20	2541	2549	9	9	0	read	NM_006784.2	9606	10885	WDR3	DIP2|UTP12	WD repeat domain 3	WD repeat-containing protein 3|dJ776P7.2 (WD repeat domain 3)	NM_006784.2	NP_006775.1	NC_000001.11	protein-coding	REVIEWED	1	+	117929748	117960425	Reference GRCh38.p12 Primary Assembly
hsa-mir-497_25g	NM_014267.5	1	563.3	563.3	0.00743	0.0174	2	3	4.77e-07	13	1	0	9	240	0	0	204.3	0	0	21	3980	12	20	1157	1165	9	9	0	read	NM_014267.5	9606	10944	C11orf58	IMAGE145052|SMAP	chromosome 11 open reading frame 58	small acidic protein	NM_014267.5	NP_055082.1	NC_000011.10	protein-coding	VALIDATED	11	+	16738600	16758353	Reference GRCh38.p12 Primary Assembly
hsa-mir-497_25g	NM_001017956.2	1	580	580	0.017	0.0352	1	1	6.54e-06	7.5	1	0	18	240	8	0	235	0	0	21	2730	3	20	2584	2601	18	18	0	read	NM_001017956.2	9606	10956	OS9	ERLEC2|OS-9	OS9, endoplasmic reticulum lectin	protein OS-9|amplified in osteosarcoma 9|endoplasmic reticulum lectin 2|erlectin 2|osteosarcoma amplified 9, endoplasmic reticulum associated protein|osteosarcoma amplified 9, endoplasmic reticulum lectin	NM_001017956.2	NP_001017956.1	NC_000012.12	protein-coding	REVIEWED	12	+	57693954	57721556	Reference GRCh38.p12 Primary Assembly
hsa-mir-497_25g	NM_006836.1	4	1676	579.2	0.000937	0.00307	1	1	6.54e-06	13	1	0	8	312	0	0	183.2	0	0	21	8699	14	21	5100	5107	8	8	0	read	NM_006836.1	9606	10985	GCN1	GCN1L|GCN1L1|PRIC295	GCN1, eIF2 alpha kinase activator homolog	eIF-2-alpha kinase activator GCN1|GCN1 (general control of amino-acid synthesis 1, yeast)-like 1|GCN1 eIF-2-alpha kinase activator homolog|GCN1 general control of amino-acid synthesis 1-like 1|GCN1-like protein 1|general control of amino-acid synthesis 1-like protein 1|hsGCN1|peroxisome proliferator activated receptor interacting complex protein|translational activator GCN1	NM_006836.1	NP_006827.1	NC_000012.12	protein-coding	VALIDATED	12	-	120127209	120194709	Reference GRCh38.p12 Primary Assembly
hsa-mir-497_25g	NM_001317182.1	1	1778.2	1778.2	0	0	31	36	0	11	1	0	11	248	0	0	241.2	0	0	21	3437	10	20	745	755	11	11	0	read	NM_001317182.1	9606	10988	METAP2	MAP2|MNPEP|p67eIF2	methionyl aminopeptidase 2	methionine aminopeptidase 2|eIF-2-associated p67 homolog|initiation factor 2-associated 67 kDa glycoprotein|peptidase M 2|testicular tissue protein Li 17	NM_001317182.1	NP_001304111.1	NC_000012.12	protein-coding	REVIEWED	12	+	95474045	95515838	Reference GRCh38.p12 Primary Assembly
hsa-mir-497_25g	NM_001159629.1	2	1012.7	515.1	0.00511	0.0115	1	1	6.54e-06	9.5	1	0	19	240	4	0	191.1	0	0	21	2249	2	20	284	302	19	19	0	read	NM_001159629.1	9606	11001	SLC27A2	ACSVL1|FACVL1|FATP2|HsT17226|VLACS|VLCS|hFACVL1	solute carrier family 27 member 2	very long-chain acyl-CoA synthetase|FATP-2|THCA-CoA ligase|fatty acid transport protein 2|fatty-acid-coenzyme A ligase, very long-chain 1|long-chain-fatty-acid--CoA ligase|solute carrier family 27 (fatty acid transporter), member 2|very long-chain fatty-acid-coenzyme A ligase 1|very long-chain-fatty-acid-CoA ligase	NM_001159629.1	NP_001153101.1	NC_000015.10	protein-coding	REVIEWED	15	+	50182195	50236391	Reference GRCh38.p12 Primary Assembly
hsa-mir-497_25g	NM_001171805.1	1	697.2	697.2	0.000155	0.00149	3	3	2.18e-14	8.5	1	0	20	240	8	0	287.2	0	0	21	3868	1	20	493	512	20	20	0	read	NM_001171805.1	9606	11044	TENT4A	LAK-1|LAK1|PAPD7|POLK|POLS|TRF4|TRF4-1|TRF41|TUTASE5	terminal nucleotidyltransferase 4A	non-canonical poly(A) RNA polymerase PAPD7|DNA polymerase kappa|DNA polymerase sigma|PAP-associated domain-containing protein 7|TRAMP-like complex polyadenylate polymerase|poly(A) RNA polymerase D7, non-canonical|polymerase (DNA directed) sigma|terminal uridylyltransferase 5|topoisomerase-related function protein 4-1	NM_001171805.2	NP_001165276.2	NC_000005.10	protein-coding	REVIEWED	5	+	6713937	6757047	Reference GRCh38.p12 Primary Assembly
hsa-mir-497_25g	NM_007011.7	2	1054.8	826.4	0.000704	0.0109	7	7	0	8.5	1	0	19	240	12	0	247.4	0	0	21	9159	2	20	8791	8809	19	19	0	read	NM_007011.7	9606	11057	ABHD2	HS1-2|LABH2|PHPS1-2	abhydrolase domain containing 2	monoacylglycerol lipase ABHD2|2-arachidonoylglycerol hydrolase|abhydrolase domain-containing protein 2|alpha/beta hydrolase domain containing protein 2|lung alpha/beta hydrolase 2|protein PHPS1-2|testicular tissue protein Li 6	NM_007011.7	NP_008942.3	NC_000015.10	protein-coding	REVIEWED	15	+	89088149	89202359	Reference GRCh38.p12 Primary Assembly
hsa-mir-497_25g	NM_180699.3	1	624.2	624.2	0.000572	0.00664	2	4	1.82e-05	10	1	0	16	312	0	0	187.2	0	0	21	1070	6	21	134	149	16	16	0	read	NM_180699.3	9606	11066	SNRNP35	HM-1|U1SNRNPBP	small nuclear ribonucleoprotein U11/U12 subunit 35	U11/U12 small nuclear ribonucleoprotein 35 kDa protein|U1 snRNP-binding protein homolog|U11/U12 snRNP 35 kDa protein|U11/U12 snRNP 35K|U11/U12-35K|protein HM-1|small nuclear ribonucleoprotein 35kDa (U11/U12)|small nuclear ribonucleoprotein, U11/U12 35kDa subunit	NM_180699.3	NP_851030.1	NC_000012.12	protein-coding	REVIEWED	12	+	123458100	123472361	Reference GRCh38.p12 Primary Assembly
hsa-mir-497_25g	NM_001300791.1	1	319.9	319.9	0.201	0.232	4	4	0	4.5	1	0	19	32	-4	0	56.9	0	0	21	6356	1	19	6200	6218	19	19	11	read	NM_001300791.1	9606	11127	KIF3A	FLA10|KLP-20	kinesin family member 3A	kinesin-like protein KIF3A|kinesin family protein 3A|microtubule plus end-directed kinesin motor 3A	NM_001300791.1	NP_001287720.1	NC_000005.10	protein-coding	VALIDATED	5	-	132688807	132737577	Reference GRCh38.p12 Primary Assembly
hsa-mir-497_25g	NM_001349346.1	2	1465.2	1471.4	2.64e-07	1.84e-05	22	24	0	8	1	0	18	240	24	0	276.4	0	0	21	2616	3	20	2429	2446	18	18	0	read	NM_001349346.1	9606	11212	PLPBP	EPVB6D|PROSC	pyridoxal phosphate binding protein	pyridoxal phosphate homeostasis protein|PLP homeostasis protein|proline synthase co-transcribed bacterial homolog protein|proline synthetase co-transcribed bacterial homolog protein	NM_001349346.1	NP_001336275.1	NC_000008.11	protein-coding	REVIEWED	8	+	37762545	37779767	Reference GRCh38.p12 Primary Assembly
hsa-mir-497_25g	NM_017414.3	1	838.6	838.6	5.89e-07	3.74e-05	8	8	0	10	1	0	15	240	0	0	232.6	0	0	21	2037	6	20	747	761	15	15	0	read	NM_017414.3	9606	11274	USP18	ISG43|PTORCH2|UBP43	ubiquitin specific peptidase 18	ubl carboxyl-terminal hydrolase 18|43 kDa ISG15-specific protease|ISG15-specific-processing protease|hUBP43|ubiquitin specific protease 18|ubl thioesterase 18|ubl thiolesterase 18	NM_017414.3	NP_059110.2	NC_000022.11	protein-coding	VALIDATED	22	+	18149854	18177396	Reference GRCh38.p12 Primary Assembly
hsa-mir-497_25g	NM_001305102.1	1	633.4	633.4	0.00148	0.0139	3	3	2.18e-14	9	1	0	18	248	24	0	195.4	0	0	21	3644	3	20	2562	2579	18	18	0	read	NM_001305102.1	9606	11329	STK38	NDR|NDR1	serine/threonine kinase 38	serine/threonine-protein kinase 38|NDR1 protein kinase|Ndr Ser/Thr kinase-like protein|nuclear Dbf2-related kinase 1	NM_001305102.1	NP_001292031.1	NC_000006.12	protein-coding	REVIEWED	6	-	36493881	36547515	Reference GRCh38.p12 Primary Assembly
hsa-mir-497_25g	NM_007359.4	1	584.7	584.7	0.000636	0.00448	2	2	3.54e-10	6.5	1	1	20	240	60	0	155.7	0	0	21	4198	2	20	3652	3671	19	20	0	read	NM_007359.4	9606	22794	CASC3	BTZ|MLN51	CASC3, exon junction complex subunit	protein CASC3|MLN 51|barentsz|cancer susceptibility 3|cancer susceptibility candidate 3|cancer susceptibility candidate gene 3 protein|metastatic lymph node 51|metastatic lymph node gene 51 protein|protein barentsz	NM_007359.4	NP_031385.2	NC_000017.11	protein-coding	REVIEWED	17	+	40140253	40172177	Reference GRCh38.p12 Primary Assembly
hsa-mir-497_25g	NM_007361.3	2	1088	564.2	0.00731	0.0198	1	1	6.54e-06	11	1	0	14	240	0	0	241.2	0	0	21	5063	7	20	1670	1683	14	14	0	read	NM_007361.3	9606	22795	NID2	NID-2	nidogen 2	nidogen-2|osteonidogen	NM_007361.3	NP_031387.3	NC_000014.9	protein-coding	REVIEWED	14	-	52004801	52069227	Reference GRCh38.p12 Primary Assembly
hsa-mir-497_25g	NM_014901.4	1	4359.8	4359.8	0	0	97	112	0	11	1	0	15	240	0	0	198.8	0	0	21	4153	6	20	1449	1463	15	15	0	read	NM_014901.4	9606	22838	RNF44	-	ring finger protein 44	RING finger protein 44	NM_014901.4	NP_055716.1	NC_000005.10	protein-coding	REVIEWED	5	-	176526698	176544205	Reference GRCh38.p12 Primary Assembly
hsa-mir-497_25g	NM_014907.2	1	544	544	0.00138	0.0169	1	1	6.54e-06	9.5	1	0	17	240	12	0	209	0	0	21	4933	4	20	1168	1184	17	17	0	read	NM_014907.2	9606	22844	FRMPD1	FRMD2	FERM and PDZ domain containing 1	FERM and PDZ domain-containing protein 1|FERM domain-containing protein 2	NM_014907.2	NP_055722.2	NC_000009.12	protein-coding	VALIDATED	9	+	37602976	37746903	Reference GRCh38.p12 Primary Assembly
hsa-mir-497_25g	NM_001243194.1	1	867	867	2.03e-05	0.000328	8	8	0	7	1	0	20	240	12	0	244	0	0	21	3167	1	20	2381	2400	20	20	0	read	NM_001243194.1	9606	22876	INPP5F	MSTP007|MSTPO47|SAC2|hSAC2	inositol polyphosphate-5-phosphatase F	phosphatidylinositide phosphatase SAC2|Sac domain-containing inositol phosphatase 2|sac domain-containing phosphoinositide 4-phosphatase 2|sac domain-containing phosphoinositide 5-phosphatase 2	NM_001243194.1	NP_001230123.1	NC_000010.11	protein-coding	REVIEWED	10	+	119704394	119830481	Reference GRCh38.p12 Primary Assembly
hsa-mir-497_25g	NM_001282550.1	1	2983.7	2983.7	0	0	61	61	0	10	1	0	14	240	0	0	254.7	0	0	21	4507	7	20	580	593	14	14	0	read	NM_001282550.1	9606	22903	BTBD3	dJ742J24.1	BTB domain containing 3	BTB/POZ domain-containing protein 3|BTB (POZ) domain containing 3	NM_001282550.1	NP_001269479.1	NC_000020.11	protein-coding	VALIDATED	20	+	11890722	11926594	Reference GRCh38.p12 Primary Assembly
hsa-mir-497_25g	NM_012081.5	2	1152.8	1061.8	6.11e-07	5.25e-05	14	14	0	10	1	0	15	248	0	0	204.8	0	0	21	6063	6	20	3635	3649	15	15	0	read	NM_012081.5	9606	22936	ELL2	MRCCAT1	elongation factor for RNA polymerase II 2	RNA polymerase II elongation factor ELL2|ELL-related RNA polymerase II, elongation factor|elongation factor RNA for polymerase II 2|elongation factor, RNA polymerase II, 2|metastatic renal cell carcinoma-associated transcript 1	NM_012081.5	NP_036213.2	NC_000005.10	protein-coding	VALIDATED	5	-	95885097	95962070	Reference GRCh38.p12 Primary Assembly
hsa-mir-497_25g	NM_001099679.1	1	564.8	564.8	0.000788	0.00548	2	2	3.54e-10	8	1	1	19	152	20	0	277.8	0	0	21	3731	2	20	3658	3675	19	18	0	read	NM_001099679.1	9606	22954	TRIM32	BBS11|HT2A|LGMD2H|TATIP	tripartite motif containing 32	E3 ubiquitin-protein ligase TRIM32|72 kDa Tat-interacting protein|RING-type E3 ubiquitin transferase TRIM32|TAT-interactive protein, 72-KD|tripartite motif-containing protein 32|zinc-finger protein HT2A	NM_001099679.1	NP_001093149.1	NC_000009.12	protein-coding	REVIEWED	9	+	116687301	116701299	Reference GRCh38.p12 Primary Assembly
hsa-mir-497_25g	NM_001308160.1	2	1226.3	654.4	6.95e-05	0.00136	2	2	3.54e-10	11	1	0	12	244	0	0	282.4	0	0	21	12598	10	21	7354	7365	12	12	0	read	NM_001308160.1	9606	22990	PCNX1	PCNX|PCNXL1|pecanex	pecanex homolog 1	pecanex-like protein 1	NM_001308160.1	NP_001295089.1	NC_000014.9	protein-coding	REVIEWED	14	+	70907404	71115381	Reference GRCh38.p12 Primary Assembly
hsa-mir-497_25g	NM_001351444.1	2	1697.2	1158	9.47e-10	1.56e-07	17	17	0	12	1	0	9	248	0	0	182	0	0	21	12514	12	20	8740	8748	9	9	0	read	NM_001351444.1	9606	23036	ZNF292	Nbla00365|ZFP292|ZN-16|Zn-15|bA393I2.3	zinc finger protein 292	zinc finger protein 292|16 zinc-finger domain protein|putative protein product of Nbla00365	NM_001351444.1	NP_001338373.1	NC_000006.12	protein-coding	REVIEWED	6	+	87155548	87265942	Reference GRCh38.p12 Primary Assembly
hsa-mir-497_25g	NM_001353345.1	1	673.3	673.3	0.00178	0.0194	4	4	0	9	1	1	15	252	0	0	220.3	0	0	21	8332	7	21	7204	7217	15	14	0	read	NM_001353345.1	9606	23067	SETD1B	KMT2G|Set1B	SET domain containing 1B	histone-lysine N-methyltransferase SETD1B|SET domain-containing protein 1B|hSET1B|lysine N-methyltransferase 2G	NM_001353345.1	NP_001340274.1	NC_000012.12	protein-coding	VALIDATED	12	+	121803664	121832655	Reference GRCh38.p12 Primary Assembly
hsa-mir-497_25g	NM_001301248.1	1	1027.6	1027.6	1.08e-05	0.000335	12	12	0	10	1	0	17	240	8	0	258.6	0	0	21	9284	4	20	335	351	17	17	0	read	NM_001301248.1	9606	23085	ERC1	Cast2|ELKS|ERC-1|RAB6IP2	ELKS/RAB6-interacting/CAST family member 1	ELKS/Rab6-interacting/CAST family member 1|RAB6 interacting protein 2	NM_001301248.1	NP_001288177.1	NC_000012.12	protein-coding	REVIEWED	12	+	990029	1495932	Reference GRCh38.p12 Primary Assembly
hsa-mir-497_25g	NM_001300960.1	1	640.4	640.4	0.00539	0.0251	4	4	0	8	1	0	16	248	0	0	171.4	0	0	21	6114	5	20	5142	5157	16	16	0	read	NM_001300960.1	9606	23097	CDK19	CDC2L6|CDK11|bA346C16.3	cyclin dependent kinase 19	cyclin-dependent kinase 19|CDC2-related protein kinase 6|CDK8-like cyclin-dependent kinase|cell division cycle 2-like 6 (CDK8-like)|cell division cycle 2-like protein kinase 6|cell division protein kinase 19|cyclin dependent kinase 19 variant 2|cyclin-dependent kinase (CDC2-like) 11|cyclin-dependent kinase 11|death-preventing kinase	NM_001300960.1	NP_001287889.1	NC_000006.12	protein-coding	REVIEWED	6	-	110609977	110816530	Reference GRCh38.p12 Primary Assembly
hsa-mir-497_25g	NM_001292034.2	3	5968.8	4728.6	0	0	106	116	0	8	1	0	20	240	12	0	188.6	0	0	21	4171	1	20	1341	1360	20	20	0	read	NM_001292034.2	9606	23118	TAB2	CHTD2|MAP3K7IP2|TAB-2	TGF-beta activated kinase 1 (MAP3K7) binding protein 2	TGF-beta-activated kinase 1 and MAP3K7-binding protein 2|TAK1-binding protein 2|mitogen-activated protein kinase kinase kinase 7-interacting protein 2	NM_001292034.2	NP_001278963.1	NC_000006.12	protein-coding	REVIEWED	6	+	149217923	149411612	Reference GRCh38.p12 Primary Assembly
hsa-mir-497_25g	NM_001002909.3	2	1158.4	649.3	0.00112	0.0122	2	2	3.54e-10	8	1	0	17	312	36	0	165.3	0	0	21	7049	5	21	4372	4388	17	17	0	read	NM_001002909.3	9606	23131	GPATCH8	GPATC8|KIAA0553	G-patch domain containing 8	G patch domain-containing protein 8	NM_001002909.3	NP_001002909.1	NC_000017.11	protein-coding	REVIEWED	17	-	44395276	44503601	Reference GRCh38.p12 Primary Assembly
hsa-mir-497_25g	NM_001351277.1	1	557.4	557.4	0.00368	0.0131	1	1	6.54e-06	8.5	1	0	19	240	24	0	206.4	0	0	21	8669	2	20	6484	6502	19	19	0	read	NM_001351277.1	9606	23185	LARP4B	KIAA0217|LARP5	La ribonucleoprotein domain family member 4B	la-related protein 4B|La ribonucleoprotein domain family, member 5|la-related protein 5	NM_001351277.1	NP_001338206.1	NC_000010.11	protein-coding	REVIEWED	10	-	806913	931899	Reference GRCh38.p12 Primary Assembly
hsa-mir-497_25g	NM_001286050.1	1	541.3	541.3	0.00389	0.00904	1	1	6.54e-06	8	1	0	17	240	12	0	190.3	0	0	21	7305	4	20	749	765	17	17	0	read	NM_001286050.1	9606	23201	FAM168A	KIAA0280|TCRP1	family with sequence similarity 168 member A	protein FAM168A|tongue cancer chemotherapy resistance-associated protein 1	NM_001286050.1	NP_001272979.1	NC_000011.10	protein-coding	VALIDATED	11	-	73400477	73598188	Reference GRCh38.p12 Primary Assembly
hsa-mir-497_25g	NM_015191.2	1	833.1	833.1	0.0244	0.0467	7	7	0	11	1	0	12	240	0	0	267.1	0	0	21	5758	9	20	1146	1157	12	12	0	read	NM_015191.2	9606	23235	SIK2	LOH11CR1I|QIK|SIK-2|SNF1LK2	salt inducible kinase 2	serine/threonine-protein kinase SIK2|SNF1-like kinase 2|qin-induced kinase|salt-inducible protein kinase 2|salt-inducible serine/threonine kinase 2|serine/threonine-protein kinase SNF1-like kinase 2	NM_015191.2	NP_056006.1	NC_000011.10	protein-coding	VALIDATED	11	+	111602390	111726916	Reference GRCh38.p12 Primary Assembly
hsa-mir-497_25g	NM_001293640.1	1	520.8	520.8	0.0563	0.0726	1	1	6.54e-06	5.5	1	1	21	152	36	0	241.8	0	0	21	5833	1	20	568	588	20	21	0	read	NM_001293640.1	9606	23325	WASHC4	KIAA1033|MRT43|SWIP	WASH complex subunit 4	WASH complex subunit 4|WASH complex subunit 7|WASH complex subunit SWIP|strumpellin and WASH-interacting protein	NM_001293640.1	NP_001280569.1	NC_000012.12	protein-coding	REVIEWED	12	+	105107713	105169133	Reference GRCh38.p12 Primary Assembly
hsa-mir-497_25g	NM_001282752.2	1	812	812	2.01e-06	9.27e-05	8	8	0	10	1	0	14	240	0	0	200	0	0	21	6265	7	20	3094	3107	14	14	0	read	NM_001282752.2	9606	23369	PUM2	PUMH2|PUML2	pumilio RNA binding family member 2	pumilio homolog 2|pumilio-2	NM_001282752.2	NP_001269681.1	NC_000002.12	protein-coding	REVIEWED	2	-	20248690	20352427	Reference GRCh38.p12 Primary Assembly
hsa-mir-497_25g	NM_015340.3	2	788.9	519.9	0.0158	0.033	1	1	6.54e-06	13	1	0	9	240	0	0	200.9	0	0	21	4203	12	20	2187	2195	9	9	0	read	NM_015340.3	9606	23395	LARS2	HLASA|LEURS|PRLTS4|mtLeuRS	leucyl-tRNA synthetase 2, mitochondrial	probable leucine--tRNA ligase, mitochondrial|leucine tRNA ligase 2, mitochondrial|leucine tRNA ligase 2, mitocondrial|leucine translase|probable leucyl-tRNA synthetase, mitochondrial	NM_015340.3	NP_056155.1	NC_000003.12	protein-coding	REVIEWED	3	+	45388563	45548841	Reference GRCh38.p12 Primary Assembly
hsa-mir-497_25g	NM_014287.3	1	586.1	586.1	0.000813	0.00282	1	1	6.54e-06	9.5	1	0	15	312	0	0	178.1	0	0	21	4261	7	21	3082	3096	15	15	0	read	NM_014287.3	9606	23420	NOMO1	Nomo|PM5	NODAL modulator 1	nodal modulator 1|nodal modulator 3|pM5 protein 3|pM5 protein, telomeric copy	NM_014287.3	NP_055102.3	NC_000016.10	protein-coding	REVIEWED	16	+	14833785	14896156	Reference GRCh38.p12 Primary Assembly
hsa-mir-497_25g	NM_007375.3	1	531.4	531.4	0.0093	0.0418	1	1	6.54e-06	5.5	1	1	20	252	24	0	159.4	0	0	21	4236	2	21	1092	1110	20	19	0	read	NM_007375.3	9606	23435	TARDBP	ALS10|TDP-43	TAR DNA binding protein	TAR DNA-binding protein 43|TAR DNA-binding protein-43	NM_007375.3	NP_031401.1	NC_000001.11	protein-coding	REVIEWED	1	+	11012621	11030527	Reference GRCh38.p12 Primary Assembly
hsa-mir-497_25g	NM_012433.3	1	654.3	654.3	0.00103	0.0116	4	4	0	8	1	0	19	240	4	0	201.3	0	0	21	4338	2	20	3129	3147	19	19	0	read	NM_012433.3	9606	23451	SF3B1	Hsh155|MDS|PRP10|PRPF10|SAP155|SF3b155	splicing factor 3b subunit 1	splicing factor 3B subunit 1|pre-mRNA processing 10|pre-mRNA splicing factor SF3b, 155 kDa subunit|spliceosome-associated protein 155|splicing factor 3b, subunit 1, 155kDa	NM_012433.3	NP_036565.2	NC_000002.12	protein-coding	REVIEWED	2	-	197391973	197435092	Reference GRCh38.p12 Primary Assembly
hsa-mir-497_25g	NM_001127321.1	1	663.3	663.3	8.11e-05	0.0016	4	4	0	10.5	1	0	16	240	0	0	224.3	0	0	21	11525	5	20	4039	4054	16	16	0	read	NM_001127321.1	9606	23468	CBX5	HEL25|HP1|HP1A	chromobox 5	chromobox protein homolog 5|HP1 alpha homolog|HP1-ALPHA|HP1Hs alpha|antigen p25|chromobox homolog 5 (HP1 alpha homolog, Drosophila)|epididymis luminal protein 25|heterochromatin protein 1 homolog alpha|heterochromatin protein 1-alpha	NM_001127321.1	NP_001120793.1	NC_000012.12	protein-coding	REVIEWED	12	-	54230945	54280130	Reference GRCh38.p12 Primary Assembly
hsa-mir-497_25g	NM_012142.4	1	557.6	557.6	0.00507	0.029	1	1	6.54e-06	8.5	1	0	20	240	16	0	217.6	0	0	21	3669	1	20	497	516	20	20	0	read	NM_012142.4	9606	23582	CCNDBP1	DIP1|GCIP|HHM	cyclin D1 binding protein 1	cyclin-D1-binding protein 1|D-type cyclin-interacting protein 1|cyclin D-type binding-protein 1|grap2 and cyclin-D-interacting protein|human homolog of Maid	NM_012142.4	NP_036274.3	NC_000015.10	protein-coding	REVIEWED	15	+	43185117	43197176	Reference GRCh38.p12 Primary Assembly
hsa-mir-497_25g	NM_001042476.2	1	651.7	651.7	0.000407	0.00281	1	1	6.54e-06	7	1	0	20	312	12	0	227.7	0	0	21	3043	2	21	1839	1858	20	20	0	read	NM_001042476.2	9606	23589	CARHSP1	CRHSP-24|CRHSP24|CSDC1	calcium regulated heat stable protein 1	calcium-regulated heat-stable protein 1|calcium regulated heat stable protein 1, 24kDa|calcium-regulated heat-stable protein (24kD)|calcium-regulated heat-stable protein of 24 kDa	NM_001042476.2	NP_001035941.1	NC_000016.10	protein-coding	VALIDATED	16	-	8852941	8869011	Reference GRCh38.p12 Primary Assembly
hsa-mir-497_25g	NM_001197259.1	1	554.4	554.4	0.00532	0.0293	2	2	3.54e-10	13	1	0	8	248	0	0	182.4	0	0	21	2488	13	20	1749	1756	8	8	0	read	NM_001197259.1	9606	23595	ORC3	LAT|LATHEO|ORC3L	origin recognition complex subunit 3	origin recognition complex subunit 3|homolog of latheo, Drosophila|origin recognition complex subunit Latheo|origin recognition complex, subunit 3 honolog	NM_001197259.1	NP_001184188.1	NC_000006.12	protein-coding	REVIEWED	6	+	87590066	87677823	Reference GRCh38.p12 Primary Assembly
hsa-mir-497_25g	NM_014322.2	1	546.4	546.4	0.00178	0.00467	1	1	6.54e-06	10	1	0	15	240	0	0	218.4	0	0	21	2632	6	20	1978	1992	15	15	0	read	NM_014322.2	9606	23596	OPN3	ECPN|PPP1R116	opsin 3	opsin-3|encephalopsin|opsin 3 (encephalopsin, panopsin)|protein phosphatase 1, regulatory subunit 116	NM_014322.2	NP_055137.2	NC_000001.11	protein-coding	REVIEWED	1	-	241593149	241640398	Reference GRCh38.p12 Primary Assembly
hsa-mir-497_25g	NM_001145125.1	1	554	554	0.0085	0.0184	1	1	6.54e-06	9	1	0	17	240	24	0	201	0	0	21	1686	4	20	959	975	17	17	0	read	NM_001145125.1	9606	23608	MKRN1	RNF61	makorin ring finger protein 1	E3 ubiquitin-protein ligase makorin-1|RING finger protein 61|RING-type E3 ubiquitin transferase makorin-1	NM_001145125.1	NP_001138597.1	NC_000007.14	protein-coding	REVIEWED	7	-	140453039	140479568	Reference GRCh38.p12 Primary Assembly
hsa-mir-497_25g	NM_001256732.2	1	31.4	31.4	0.596	0.604	1	1	6.54e-06	8.5	1	0	14	-100	-10	0	42.4	0	0	21	9018	3	16	1345	1358	14	14	11	read	NM_001256732.2	9606	23635	SSBP2	HSPC116|SOSS-B2	single stranded DNA binding protein 2	single-stranded DNA-binding protein 2|sequence-specific single-stranded-DNA-binding protein 2	NM_001256732.2	NP_001243661.1	NC_000005.10	protein-coding	REVIEWED	5	-	81412806	81751252	Reference GRCh38.p12 Primary Assembly
hsa-mir-497_25g	NM_012317.3	1	557.9	557.9	0.0501	0.0675	2	2	3.54e-10	12	1	0	11	240	0	0	197.9	0	0	21	1470	10	20	1035	1045	11	11	0	read	NM_012317.3	9606	23641	LDOC1	BCUR1|Mar7|Mart7|RTL7|SIRH7	LDOC1, regulator of NFKB signaling	protein LDOC1|Sushi-Ichi retrotransposon homolog 7|breast cancer, up-regulated 1|leucine zipper down-regulated in cancer 1|leucine zipper downregulated in cancer|leucine zipper protein down-regulated in cancer cells|mammalian retrotransposon-derived 7|retrotransposon Gag like 7	NM_012317.3	NP_036449.1	NC_000023.11	protein-coding	REVIEWED	X	-	141175744	141177213	Reference GRCh38.p12 Primary Assembly
hsa-mir-497_25g	NR_003098.1	1	637.4	637.4	0.000207	0.00124	2	9	0.00888	8	1	0	17	240	28	0	235.4	0	0	21	1134	4	20	778	794	17	17	0	read	NR_003098.1	9606	23642	SNHG1	LINC00057|NCRNA00057|U22HG|UHG|lncRNA16	small nucleolar RNA host gene 1	U22 snoRNA host|long intergenic non-protein coding RNA 57|small nucleolar RNA host gene 1 (non-protein coding)	NR_003098.2	-	NC_000011.10	ncRNA	REVIEWED	11	-	62851977	62855884	Reference GRCh38.p12 Primary Assembly
hsa-mir-497_25g	NM_001033578.2	1	815	815	0.000147	0.0053	8	16	1.11e-16	10.5	1	0	17	152	4	0	300	0	0	21	4483	4	20	4334	4350	17	17	0	read	NM_001033578.2	9606	23678	SGK3	CISK|SGK2|SGKL	serum/glucocorticoid regulated kinase family member 3	serine/threonine-protein kinase Sgk3|cytokine-independent survival kinase	NM_001033578.2	NP_001028750.1	NC_000008.11	protein-coding	REVIEWED	8	+	66712417	66862021	Reference GRCh38.p12 Primary Assembly
hsa-mir-497_25g	NM_005813.4	1	596.5	596.5	0.00698	0.0364	3	3	2.18e-14	8.5	1	0	20	240	12	0	181.5	0	0	21	5915	1	20	2072	2091	20	20	0	read	NM_005813.4	9606	23683	PRKD3	EPK2|PKC-NU|PKD3|PRKCN|nPKC-NU	protein kinase D3	serine/threonine-protein kinase D3|protein kinase C nu type|protein kinase EPK2	NM_005813.4	NP_005804.1	NC_000002.12	protein-coding	REVIEWED	2	-	37250501	37324784	Reference GRCh38.p12 Primary Assembly
hsa-mir-497_25g	NM_001317231.1	1	609	609	0.00216	0.0107	1	1	6.54e-06	7.5	1	0	20	240	8	0	273	0	0	21	2628	1	20	2549	2568	20	20	0	read	NM_001317231.1	9606	23788	MTCH2	HSPC032|MIMP|SLC25A50	mitochondrial carrier 2	mitochondrial carrier homolog 2|2310034D24Rik|met-induced mitochondrial protein|solute carrier family 25, member 50	NM_001317231.1	NP_001304160.1	NC_000011.10	protein-coding	REVIEWED	11	-	47604308	47642653	Reference GRCh38.p12 Primary Assembly
hsa-mir-497_25g	NM_001193268.2	1	686.1	686.1	0.00146	0.0175	4	4	0	7	1	0	20	240	24	0	205.1	0	0	21	3022	1	20	996	1015	20	20	0	read	NM_001193268.2	9606	24139	EML2	ELP70|EMAP-2|EMAP2	echinoderm microtubule associated protein like 2	echinoderm microtubule-associated protein-like 2|echinoderm MT-associated protein (EMAP)-like protein 70|microtubule-associated protein like echinoderm EMAP	NM_001193268.2	NP_001180197.1	NC_000019.10	protein-coding	VALIDATED	19	-	45609395	45645628	Reference GRCh38.p12 Primary Assembly
hsa-mir-497_25g	NM_015375.2	1	1248.9	1248.9	1.62e-08	2.04e-06	17	17	0	6.5	1	1	20	240	12	0	273.9	0	0	21	7926	1	20	1618	1636	20	19	0	read	NM_015375.2	9606	25778	DSTYK	CAKUT1|DustyPK|HDCMD38P|RIP5|RIPK5|SPG23	dual serine/threonine and tyrosine protein kinase	dual serine/threonine and tyrosine protein kinase|RIP-homologous kinase|dusty PK|dusty protein kinase|receptor-interacting serine/threonine-protein kinase 5|sgK496|sugen kinase 496	NM_015375.2	NP_056190.1	NC_000001.11	protein-coding	REVIEWED	1	-	205142496	205211598	Reference GRCh38.p12 Primary Assembly
hsa-mir-497_25g	NM_001205262.2	1	646.2	646.2	0.000455	0.00305	2	2	3.54e-10	13	1	0	9	240	0	0	287.2	0	0	21	5380	12	20	3796	3804	9	9	0	read	NM_001205262.2	9606	25788	RAD54B	RDH54	RAD54 homolog B	DNA repair and recombination protein RAD54B	NM_001205262.2	NP_001192191.1	NC_000008.11	protein-coding	REVIEWED	8	-	94371959	94475114	Reference GRCh38.p12 Primary Assembly
hsa-mir-497_25g	NM_012342.2	1	1006.3	1006.3	9e-12	9.9e-10	12	12	0	7	1	1	19	240	16	0	218.3	0	0	21	1732	3	20	490	508	18	19	0	read	NM_012342.2	9606	25805	BAMBI	NMA	BMP and activin membrane bound inhibitor	BMP and activin membrane-bound inhibitor homolog|non-metastatic gene A protein|putative transmembrane protein NMA	NM_012342.2	NP_036474.1	NC_000010.11	protein-coding	REVIEWED	10	+	28677494	28682938	Reference GRCh38.p12 Primary Assembly
hsa-mir-497_25g	NM_012263.4	1	572.1	572.1	0.00658	0.0165	2	2	3.54e-10	8.5	1	0	19	240	8	0	196.1	0	0	21	1773	2	20	573	591	19	19	0	read	NM_012263.4	9606	25809	TTLL1	C22orf7|HS323M22B	tubulin tyrosine ligase like 1	probable tubulin polyglutamylase TTLL1|PGs3|catalytic subunit of neural tubulin polyglutamylase|tubulin polyglutamylase complex subunit 3|tubulin tyrosine ligase-like family, member 1|tubulin--tyrosine ligase-like protein 1|tubulin-tyrosine ligase	NM_012263.4	NP_036395.1	NC_000022.11	protein-coding	VALIDATED	22	-	43039515	43089427	Reference GRCh38.p12 Primary Assembly
hsa-mir-497_25g	NM_001330324.1	1	526.1	526.1	0.063	0.0806	1	1	6.54e-06	9	1	0	19	240	8	0	194.1	0	0	21	2707	2	20	2004	2022	19	19	0	read	NM_001330324.1	9606	25900	IFFO1	HOM-TES-103|IFFO	intermediate filament family orphan 1	intermediate filament family orphan 1|intermediate filament-like MGC:2625	NM_001330324.1	NP_001317253.1	NC_000012.12	protein-coding	REVIEWED	12	-	6539527	6556096	Reference GRCh38.p12 Primary Assembly
hsa-mir-497_25g	NM_013943.2	1	553.9	553.9	0.0127	0.0363	1	1	6.54e-06	7.5	1	0	20	240	16	0	201.9	0	0	21	4452	1	20	844	863	20	20	0	read	NM_013943.2	9606	25932	CLIC4	CLIC4L|H1|MTCLIC|huH1|p64H1	chloride intracellular channel 4	chloride intracellular channel protein 4|chloride intracellular channel 4 like|intracellular chloride ion channel protein p64H1	NM_013943.2	NP_039234.1	NC_000001.11	protein-coding	REVIEWED	1	+	24745268	24844323	Reference GRCh38.p12 Primary Assembly
hsa-mir-497_25g	NM_001330353.1	1	553.9	553.9	0.0148	0.0286	2	2	3.54e-10	9.5	1	0	18	240	4	0	188.9	0	0	21	1196	3	20	316	333	18	18	0	read	NM_001330353.1	9606	25972	UNC50	GMH1|HSD23|PDLs22|UNCL|URP	unc-50 inner nuclear membrane RNA binding protein	protein unc-50 homolog|geal-6 membrane-associated high-copy suppressor 1|periodontal ligament-specific protein 22|protein GMH1 homolog|unc-50 related|unc-50-like protein|uncoordinated-like protein	NM_001330353.1	NP_001317282.1	NC_000002.12	protein-coding	VALIDATED	2	+	98608547	98618514	Reference GRCh38.p12 Primary Assembly
hsa-mir-497_25g	NM_015567.1	1	528	528	0.00252	0.00565	1	3	0.0122	6	1	1	20	240	40	0	166	0	0	21	4461	1	20	217	235	20	19	0	read	NM_015567.1	9606	26050	SLITRK5	LRRC11|bA364G4.2	SLIT and NTRK like family member 5	SLIT and NTRK-like protein 5|leucine rich repeat containing 11|leucine-rich repeat-containing protein 11|slit and trk like gene 5	NM_015567.1	NP_056382.1	NC_000013.11	protein-coding	VALIDATED	13	+	87671231	87679618	Reference GRCh38.p12 Primary Assembly
hsa-mir-497_25g	NM_001290145.1	1	527.1	527.1	0.0195	0.0349	1	1	6.54e-06	13	1	0	9	240	0	0	208.1	0	0	21	2699	12	20	1593	1601	9	9	0	read	NM_001290145.1	9606	26073	POLDIP2	PDIP38|POLD4|p38	DNA polymerase delta interacting protein 2	polymerase delta-interacting protein 2|38 kDa DNA polymerase delta interaction protein|polymerase (DNA) delta interacting protein 2|polymerase (DNA-directed), delta interacting protein 2|polymerase delta interacting protein 38	NM_001290145.1	NP_001277074.1	NC_000017.11	protein-coding	REVIEWED	17	-	28346627	28357588	Reference GRCh38.p12 Primary Assembly
hsa-mir-497_25g	NM_001202438.1	2	1570.4	991.5	1.03e-06	7.3e-05	12	12	0	9	1	0	19	240	12	0	215.5	0	0	21	4698	2	20	2460	2478	19	19	0	read	NM_001202438.1	9606	26098	EDRF1	C10orf137	erythroid differentiation regulatory factor 1	erythroid differentiation-related factor 1	NM_001202438.1	NP_001189367.1	NC_000010.11	protein-coding	REVIEWED	10	+	125719514	125764142	Reference GRCh38.p12 Primary Assembly
hsa-mir-497_25g	NM_001114600.2	1	621.6	621.6	0.000919	0.00391	2	2	3.54e-10	5	1	1	21	312	16	0	158.6	0	0	21	3695	1	21	702	721	21	20	0	read	NM_001114600.2	9606	26099	SZRD1	C1orf144	SUZ RNA binding domain containing 1	SUZ domain-containing protein 1|UPF0485 protein C1orf144|putative MAPK activating protein PM20,PM21|putative MAPK-activating protein PM18/PM20/PM22	NM_001114600.2	NP_001108072.1	NC_000001.11	protein-coding	VALIDATED	1	+	16367029	16398147	Reference GRCh38.p12 Primary Assembly
hsa-mir-497_25g	NM_001018067.1	1	666	666	0.0001	0.00159	3	3	2.18e-14	13	1	0	9	240	0	0	267	0	0	21	6764	12	20	6196	6204	9	9	0	read	NM_001018067.1	9606	26135	SERBP1	CGI-55|CHD3IP|HABP4L|PAI-RBP1|PAIRBP1	SERPINE1 mRNA binding protein 1	plasminogen activator inhibitor 1 RNA-binding protein|PAI-1 mRNA binding protein|PAI1 RNA-binding protein 1|chromodomain helicase DNA binding protein 3 interacting protein	NM_001018067.1	NP_001018077.1	NC_000001.11	protein-coding	VALIDATED	1	-	67407809	67430439	Reference GRCh38.p12 Primary Assembly
hsa-mir-497_25g	NM_015641.3	1	618	618	0.00259	0.018	2	2	3.54e-10	4	1	2	20	240	20	0	232	0	0	21	2799	1	20	498	515	20	18	0	read	NM_015641.3	9606	26136	TES	TESS|TESS-2	testin LIM domain protein	testin|testis derived transcript (3 LIM domains)	NM_015641.3	NP_056456.1	NC_000007.14	protein-coding	REVIEWED	7	+	116210492	116258785	Reference GRCh38.p12 Primary Assembly
hsa-mir-497_25g	NM_006623.3	2	1791.4	1269.5	7.92e-12	9.81e-10	19	20	0	8.5	1	0	19	240	24	0	194.5	0	0	21	2021	2	20	1645	1663	19	19	0	read	NM_006623.3	9606	26227	PHGDH	3-PGDH|3PGDH|HEL-S-113|NLS|NLS1|PDG|PGAD|PGD|PGDH|PHGDHD|SERA	phosphoglycerate dehydrogenase	D-3-phosphoglycerate dehydrogenase|2-oxoglutarate reductase|3-phosphoglycerate dehydrogenase|epididymis secretory protein Li 113|malate dehydrogenase	NM_006623.3	NP_006614.2	NC_000001.11	protein-coding	REVIEWED	1	+	119711795	119744225	Reference GRCh38.p12 Primary Assembly
hsa-mir-497_25g	NM_012166.2	2	1198.6	722.6	0.000575	0.00713	2	2	3.54e-10	13	1	0	8	312	0	0	286.6	0	0	21	4592	14	21	4478	4485	8	8	0	read	NM_012166.2	9606	26267	FBXO10	FBX10|PRMT11	F-box protein 10	F-box only protein 10|F-box protein Fbx10	NM_012166.2	NP_036298.2	NC_000009.12	protein-coding	VALIDATED	9	-	37510891	37576458	Reference GRCh38.p12 Primary Assembly
hsa-mir-497_25g	NM_012347.4	1	647.6	647.6	0.00206	0.0114	4	4	0	13	1	0	8	248	0	0	195.6	0	0	21	4438	13	20	619	626	8	8	0	read	NM_012347.4	9606	26268	FBXO9	FBX9|NY-REN-57|VCIA1|dJ341E18.2	F-box protein 9	F-box only protein 9|F-box protein Fbx9|cross-immune reaction antigen 1|renal carcinoma antigen NY-REN-57	NM_012347.4	NP_036479.1	NC_000006.12	protein-coding	REVIEWED	6	+	53057806	53100872	Reference GRCh38.p12 Primary Assembly
hsa-mir-497_25g	NM_001142522.2	1	1573.3	1573.3	6.41e-08	2.16e-06	26	33	0	8	1	0	19	240	20	0	225.3	0	0	21	2275	2	20	843	861	19	19	0	read	NM_001142522.2	9606	26271	FBXO5	EMI1|FBX5|Fbxo31	F-box protein 5	F-box only protein 5|F-box protein Fbx5|early mitotic inhibitor 1	NM_001142522.2	NP_001135994.1	NC_000006.12	protein-coding	REVIEWED	6	-	152970518	152983618	Reference GRCh38.p12 Primary Assembly
hsa-mir-497_25g	NM_001257994.1	1	524.4	524.4	0.00374	0.0164	1	1	6.54e-06	6.5	1	0	20	240	24	0	158.4	0	0	21	3003	1	20	1002	1021	20	20	0	read	NM_001257994.1	9606	27037	TRMT2A	HTF9C	tRNA methyltransferase 2 homolog A	tRNA (uracil-5-)-methyltransferase homolog A|TRM2 tRNA methyltransferase 2 homolog A|hpaII tiny fragments locus 9c protein	NM_001257994.1	NP_001244923.1	NC_000022.11	protein-coding	REVIEWED	22	-	20111865	20117294	Reference GRCh38.p12 Primary Assembly
hsa-mir-497_25g	NM_001040101.1	1	633.4	633.4	0.000226	0.00131	1	1	6.54e-06	5	1	1	21	312	12	0	220.4	0	0	21	2635	1	21	1112	1131	21	20	0	read	NM_001040101.1	9606	27065	NSG1	D4S234|D4S234E|NEEP21|P21	neuronal vesicle trafficking associated 1	neuronal vesicle trafficking-associated protein 1|brain neuron cytoplasmic protein 1|carboxyterminally EE-tagged neuron-enriched endosomal 21 kDa protein|neuron specific gene family member 1|neuron-enriched endosomal protein of 21 kD|neuron-enriched endosomal protein of 21 kDa|neuron-specific protein family member 1	NM_001040101.1	NP_001035190.1	NC_000004.12	protein-coding	VALIDATED	4	+	4386255	4419057	Reference GRCh38.p12 Primary Assembly
hsa-mir-497_25g	NM_001164623.2	1	530.4	530.4	0.00944	0.0418	1	1	6.54e-06	6.5	1	1	22	252	12	0	179.4	0	0	21	14411	1	21	6939	6960	21	22	0	read	NM_001164623.2	9606	27161	AGO2	CASC7|EIF2C2|LINC00980|PPD|Q10	argonaute 2, RISC catalytic component	protein argonaute-2|PAZ Piwi domain protein|argonaute RISC catalytic component 2|cancer susceptibility candidate 7|cancer susceptibility candidate 7 (non-protein coding)|eukaryotic translation initiation factor 2C, 2|long intergenic non-protein coding RNA 980|protein slicer	NM_001164623.2	NP_001158095.1	NC_000008.11	protein-coding	REVIEWED	8	-	140520150	140642405	Reference GRCh38.p12 Primary Assembly
hsa-mir-497_25g	NM_014452.4	2	2590.8	2080.8	0	0	39	39	0	5	1	0	20	248	16	0	187.8	0	0	21	3646	1	20	792	811	20	20	0	read	NM_014452.4	9606	27242	TNFRSF21	BM-018|CD358|DR6	TNF receptor superfamily member 21	tumor necrosis factor receptor superfamily member 21|TNFR-related death receptor 6|death receptor 6	NM_014452.4	NP_055267.1	NC_000006.12	protein-coding	REVIEWED	6	-	47231526	47309946	Reference GRCh38.p12 Primary Assembly
hsa-mir-497_25g	NM_001308155.1	1	1246.6	1246.6	8.87e-10	8.94e-08	17	17	0	9.5	1	0	19	240	12	0	272.6	0	0	21	4254	2	20	3075	3093	19	19	0	read	NM_001308155.1	9606	27333	GOLIM4	GIMPC|GOLPH4|GPP130|P138	golgi integral membrane protein 4	Golgi integral membrane protein 4|130 kDa golgi-localized phosphoprotein|cis Golgi-localized calcium-binding protein|golgi integral membrane protein, cis|golgi phosphoprotein 4|golgi phosphoprotein of 130 kDa|golgi-localized phosphoprotein of 130 kDa|type II Golgi membrane protein	NM_001308155.1	NP_001295084.1	NC_000003.12	protein-coding	REVIEWED	3	-	168008671	168095924	Reference GRCh38.p12 Primary Assembly
hsa-mir-497_25g	NM_014503.2	3	2473.4	1939.5	0	0	34	34	0	8.5	1	0	19	240	16	0	277.5	0	0	21	9029	2	20	8367	8385	19	19	0	read	NM_014503.2	9606	27340	UTP20	1A6/DRIM|DRIM	UTP20, small subunit processome component	small subunit processome component 20 homolog|NNP73|UTP20 small subunit (SSU) processome component|UTP20, small subunit (SSU) processome component, homolog|down regulated in metastasis|down-regulated in metastasis protein|novel nucleolar protein 73	NM_014503.2	NP_055318.2	NC_000012.12	protein-coding	VALIDATED	12	+	101280126	101386618	Reference GRCh38.p12 Primary Assembly
hsa-mir-497_25g	NM_001317893.1	1	567.5	567.5	7.61e-05	0.00016	2	2	3.54e-10	6.5	1	0	20	320	8	0	91.5	0	0	21	1792	2	21	224	243	20	20	0	read	NM_001317893.1	9606	27348	TOR1B	DQ1	torsin family 1 member B	torsin-1B|torsin ATPase-1B|torsin B	NM_001317893.1	NP_001304822.1	NC_000009.12	protein-coding	REVIEWED	9	+	129803142	129811423	Reference GRCh38.p12 Primary Assembly
hsa-mir-497_25g	NM_013283.4	1	1725.3	1725.3	1.4e-14	2.44e-12	31	34	0	8.5	1	0	20	240	8	0	194.3	0	0	21	2154	1	20	467	486	20	20	0	read	NM_013283.4	9606	27430	MAT2B	MAT-II|MATIIbeta|Nbla02999|SDR23E1|TGR	methionine adenosyltransferase 2B	methionine adenosyltransferase 2 subunit beta|MAT II beta|beta regulatory subunit of methionine adenosyltransferase|dTDP-4-keto-6-deoxy-D-glucose 4-reductase|methionine adenosyltransferase II, beta|putative dTDP-4-keto-6-deoxy-D-glucose 4-reductase|putative protein product of Nbla02999|short chain dehydrogenase/reductase family 23E, member 1|testicular tissue protein Li 118	NM_013283.4	NP_037415.1	NC_000005.10	protein-coding	REVIEWED	5	+	163503063	163519352	Reference GRCh38.p12 Primary Assembly
hsa-mir-497_25g	NM_014050.3	1	742.6	742.6	0.000191	0.00656	6	6	0	12	1	0	11	240	0	0	222.6	0	0	21	3139	10	20	1645	1655	11	11	0	read	NM_014050.3	9606	28977	MRPL42	HSPC204|L31MT|L42MT|MRP-L31|MRP-L42|MRP-S32|MRPL31|MRPS32|PTD007|RPML31|S32MT	mitochondrial ribosomal protein L42	39S ribosomal protein L42, mitochondrial|28S ribosomal protein S32, mitochondrial|39S ribosomal protein L31, mitochondrial|mitochondrial large ribosomal subunit protein mL42	NM_014050.3	NP_054769.1	NC_000012.12	protein-coding	REVIEWED	12	+	93467489	93503771	Reference GRCh38.p12 Primary Assembly
hsa-mir-497_25g	NM_014053.3	2	2561.9	1921.9	0	0	35	35	0	10	1	0	15	248	0	0	224.9	0	0	21	5947	6	20	2598	2612	15	15	0	read	NM_014053.3	9606	28982	FLVCR1	AXPC1|FLVCR|MFSD7B|PCA|PCARP	feline leukemia virus subgroup C cellular receptor 1	feline leukemia virus subgroup C receptor-related protein 1	NM_014053.3	NP_054772.1	NC_000001.11	protein-coding	REVIEWED	1	+	212858254	212899362	Reference GRCh38.p12 Primary Assembly
hsa-mir-497_25g	NM_001318202.1	2	641.3	521.9	0.027	0.0489	1	1	6.54e-06	7	1	1	20	248	28	0	154.9	0	0	21	3948	2	20	2210	2229	19	20	0	read	NM_001318202.1	9606	29109	FHOD1	FHOS	formin homology 2 domain containing 1	FH1/FH2 domain-containing protein 1|formin homolog overexpressed in spleen 1	NM_001318202.1	NP_001305131.1	NC_000016.10	protein-coding	REVIEWED	16	-	67229388	67247521	Reference GRCh38.p12 Primary Assembly
hsa-mir-497_25g	NM_013335.3	1	582.9	582.9	0.00341	0.0275	2	2	3.54e-10	7.5	1	0	17	252	40	0	147.9	0	0	21	1564	5	21	1247	1263	17	17	0	read	NM_013335.3	9606	29926	GMPPA	AAMR	GDP-mannose pyrophosphorylase A	mannose-1-phosphate guanyltransferase alpha|GMPP-alpha|GTP-mannose-1-phosphate guanylyltransferase alpha|mannose-1-phosphate guanylyltransferase (GDP)	NM_013335.3	NP_037467.2	NC_000002.12	protein-coding	REVIEWED	2	+	219498864	219506995	Reference GRCh38.p12 Primary Assembly
hsa-mir-497_25g	NM_013444.3	2	1219.1	700.4	0.0538	0.0687	3	3	2.18e-14	6	1	1	19	312	28	0	188.4	0	0	21	3418	3	21	1333	1350	19	18	0	read	NM_013444.3	9606	29978	UBQLN2	ALS15|CHAP1|DSK2|HRIHFB2157|N4BP4|PLIC2	ubiquilin 2	ubiquilin-2|Nedd4 binding protein 4|protein linking IAP with cytoskeleton 2|ubiquitin-like product Chap1/Dsk2	NM_013444.3	NP_038472.2	NC_000023.11	protein-coding	REVIEWED	X	+	56563592	56567009	Reference GRCh38.p12 Primary Assembly
hsa-mir-497_25g	NM_001142541.2	1	578.3	578.3	0.00141	0.0107	2	2	3.54e-10	12	1	0	10	240	0	0	213.3	0	0	21	1860	11	20	772	781	10	10	0	read	NM_001142541.2	9606	51000	SLC35B3	C6orf196|CGI-19|PAPST2	solute carrier family 35 member B3	adenosine 3'-phospho 5'-phosphosulfate transporter 2|3' phosphoadenosine 5' phosphosulfate transporter 2|PAPS transporter 2|solute carrier family 35 (adenosine 3'-phospho 5'-phosphosulfate transporter), member B3	NM_001142541.2	NP_001136013.1	NC_000006.12	protein-coding	VALIDATED	6	-	8413065	8436168	Reference GRCh38.p12 Primary Assembly
hsa-mir-497_25g	NM_015956.2	1	7338.3	7338.3	0	0	171	171	0	9.5	1	0	16	240	0	0	210.3	0	0	21	1511	5	20	772	787	16	16	0	read	NM_015956.2	9606	51073	MRPL4	CGI-28|L4mt	mitochondrial ribosomal protein L4	39S ribosomal protein L4, mitochondrial|MRP-L4|mitochondrial large ribosomal subunit protein uL4m	NM_015956.2	NP_057040.2	NC_000019.10	protein-coding	REVIEWED	19	+	10251961	10260059	Reference GRCh38.p12 Primary Assembly
hsa-mir-497_25g	NM_001008222.2	1	2622.6	2622.6	0	0	53	57	0	13	1	0	9	240	0	0	223.6	0	0	21	4639	12	20	673	681	9	9	0	read	NM_001008222.2	9606	51114	ZDHHC9	CGI89|CXorf11|DHHC9|MMSA1|MRXSZ|ZDHHC10|ZNF379|ZNF380	zinc finger DHHC-type containing 9	palmitoyltransferase ZDHHC9|Asp-His-His-Cys domain containing protein 9|antigen MMSA-1|zinc finger protein 379|zinc finger protein 380|zinc finger, DHHC domain containing 10	NM_001008222.2	NP_001008223.1	NC_000023.11	protein-coding	REVIEWED	X	-	129803287	129843933	Reference GRCh38.p12 Primary Assembly
hsa-mir-497_25g	NM_001195218.1	1	677.8	677.8	0.00545	0.0226	2	2	3.54e-10	5.5	1	0	20	240	28	0	265.8	0	0	21	854	1	20	802	821	20	20	0	read	NM_001195218.1	9606	51181	DCXR	DCR|HCR2|HCRII|KIDCR|P34H|PNTSU|SDR20C1|XR	dicarbonyl and L-xylulose reductase	L-xylulose reductase|carbonyl reductase 2|carbonyl reductase II|dicarbonyl/L-xylulose reductase|kidney dicarbonyl reductase|short chain dehydrogenase/reductase family 20C member 1|sperm surface protein P34H	NM_001195218.1	NP_001182147.1	NC_000017.11	protein-coding	REVIEWED	17	-	82035880	82037696	Reference GRCh38.p12 Primary Assembly
hsa-mir-497_25g	NM_001134779.1	1	536.4	536.4	0.00843	0.0244	1	1	6.54e-06	10	1	0	16	152	0	0	302.4	0	0	21	4480	5	20	3551	3566	16	16	0	read	NM_001134779.1	9606	51194	IPO11	RanBP11	importin 11	importin-11|Ran binding protein 11|imp11|ran-binding protein 11	NM_001134779.1	NP_001128251.1	NC_000005.10	protein-coding	VALIDATED	5	+	62412745	62628588	Reference GRCh38.p12 Primary Assembly
hsa-mir-497_25g	NM_016626.4	1	2049.4	2049.4	0	0	39	40	0	13	1	0	8	248	0	0	197.4	0	0	21	4158	13	20	2760	2767	8	8	0	read	NM_016626.4	9606	51320	MEX3C	BM-013|MEX-3C|RKHD2|RNF194	mex-3 RNA binding family member C	RNA-binding E3 ubiquitin-protein ligase MEX3C|MEX3C variant 1|MEX3C variant 2|RING finger and KH domain-containing protein 2|RING finger protein 194|RING-type E3 ubiquitin transferase MEX3C|RNA-binding protein MEX3C|ring finger and KH domain containing 2	NM_016626.4	NP_057710.3	NC_000018.10	protein-coding	REVIEWED	18	-	51174549	51197680	Reference GRCh38.p12 Primary Assembly
hsa-mir-497_25g	NM_001278625.1	1	664.8	664.8	0.0573	0.0713	4	4	0	10	1	0	15	240	0	0	218.8	0	0	21	4377	6	20	2415	2429	15	15	0	read	NM_001278625.1	9606	51340	CRNKL1	CLF|CRN|Clf1|HCRN|MSTP021|SYF3	crooked neck pre-mRNA splicing factor 1	crooked neck-like protein 1|Crn, crooked neck-like 1|SYF3 pre-mRNA-splicing factor|crooked neck homolog|crooked neck pre-mRNA splicing factor-like 1|crooked neck-like 1	NM_001278625.1	NP_001265554.1	NC_000020.11	protein-coding	REVIEWED	20	-	20034360	20056045	Reference GRCh38.p12 Primary Assembly
hsa-mir-497_25g	NM_001278683.1	1	681.6	681.6	0.00418	0.0211	2	2	3.54e-10	6.5	1	1	20	312	40	0	202.6	0	0	21	4991	2	21	4393	4411	20	19	0	read	NM_001278683.1	9606	51421	AMOTL2	LCCP	angiomotin like 2	angiomotin-like protein 2|Leman coiled-coil protein	NM_001278683.1	NP_001265612.1	NC_000003.12	protein-coding	REVIEWED	3	-	134355344	134375416	Reference GRCh38.p12 Primary Assembly
hsa-mir-497_25g	NM_001002244.2	1	525.8	525.8	0.00365	0.0163	1	1	6.54e-06	10	1	0	17	240	4	0	200.8	0	0	21	1186	4	20	249	265	17	17	0	read	NM_001002244.2	9606	51529	ANAPC11	APC11|Apc11p|HSPC214	anaphase promoting complex subunit 11	anaphase-promoting complex subunit 11|APC11 anaphase promoting complex subunit 11 homolog|anaphase promoting complex subunit 11 (yeast APC11 homolog)|cyclosome subunit 11|hepatocellular carcinoma-associated RING finger protein	NM_001002244.2	NP_001002244.1	NC_000017.11	protein-coding	VALIDATED	17	+	81890789	81900532	Reference GRCh38.p12 Primary Assembly
hsa-mir-497_25g	NM_016538.2	1	568.8	568.8	0.00557	0.022	1	1	6.54e-06	12	1	0	9	320	0	0	158.8	0	0	21	1749	13	21	458	466	9	9	0	read	NM_016538.2	9606	51547	SIRT7	SIR2L7	sirtuin 7	NAD-dependent protein deacetylase sirtuin-7|NAD-dependent deacetylase sirtuin-7|SIR2-like protein 7|regulatory protein SIR2 homolog 7|silent mating type information regulation 2, S.cerevisiae, homolog 7|sir2-related protein type 7|sirtuin type 7	NM_016538.2	NP_057622.1	NC_000017.11	protein-coding	REVIEWED	17	-	81911938	81918181	Reference GRCh38.p12 Primary Assembly
hsa-mir-497_25g	NM_001184728.2	1	704.2	704.2	0.000101	0.00203	5	5	0	6	1	0	20	320	8	0	106.2	0	0	21	2078	2	21	434	453	20	20	0	read	NM_001184728.2	9606	51604	PIGT	CGI-06|MCAHS3|NDAP|PNH2	phosphatidylinositol glycan anchor biosynthesis class T	GPI transamidase component PIG-T|GPI transamidase subunit|neurotrophin-regulated neuronal development-associated protein|phosphatidylinositol-glycan biosynthesis class T protein	NM_001184728.2	NP_001171657.1	NC_000020.11	protein-coding	REVIEWED	20	+	45416066	45426244	Reference GRCh38.p12 Primary Assembly
hsa-mir-497_25g	NM_016217.2	1	769.8	769.8	0.000247	0.00218	6	6	0	9	1	0	16	240	0	0	238.8	0	0	21	5621	5	20	5319	5334	16	16	0	read	NM_016217.2	9606	51696	HECA	HDC|HDCL|HHDC|dJ225E12.1	hdc homolog, cell cycle regulator	headcase protein homolog|headcase homolog	NM_016217.2	NP_057301.1	NC_000006.12	protein-coding	REVIEWED	6	+	139135111	139180808	Reference GRCh38.p12 Primary Assembly
hsa-mir-497_25g	NM_001291997.1	1	580.5	580.5	0.00358	0.0195	2	2	3.54e-10	13	1	0	8	312	0	0	144.5	0	0	21	2440	14	21	1436	1443	8	8	0	read	NM_001291997.1	9606	51741	WWOX	D16S432E|EIEE28|FOR|FRA16D|HHCMA56|PRO0128|SCAR12|SDR41C1|WOX1	WW domain containing oxidoreductase	WW domain-containing oxidoreductase|WW domain-containing protein WWOX|fragile site FRA16D oxidoreductase|short chain dehydrogenase/reductase family 41C member 1	NM_001291997.1	NP_001278926.1	NC_000016.10	protein-coding	REVIEWED	16	+	78099412	79212666	Reference GRCh38.p12 Primary Assembly
hsa-mir-497_25g	NM_017423.2	2	1160.6	630.9	0.00419	0.0138	2	2	3.54e-10	12	1	0	9	248	0	0	254.9	0	0	21	4339	12	20	2712	2720	9	9	0	read	NM_017423.2	9606	51809	GALNT7	GALNAC-T7|GalNAcT7	polypeptide N-acetylgalactosaminyltransferase 7	N-acetylgalactosaminyltransferase 7|UDP-GalNAc:polypeptide N-acetylgalactosaminyltransferase 7|UDP-N-acetyl-alpha-D-galactosamine:polypeptide N-acetylgalactosaminyltransferase 7 (GalNAc-T7)|polypeptide GalNAc transferase 7|pp-GaNTase 7|protein-UDP acetylgalactosaminyltransferase 7	NM_017423.2	NP_059119.2	NC_000004.12	protein-coding	REVIEWED	4	+	173168752	173323966	Reference GRCh38.p12 Primary Assembly
hsa-mir-497_25g	NM_001324417.1	1	590.9	590.9	0.00752	0.0371	1	1	6.54e-06	7	1	0	19	312	20	0	158.9	0	0	21	9341	3	21	3860	3878	19	19	0	read	NM_001324417.1	9606	53616	ADAM22	ADAM 22|EIEE61|MDC2	ADAM metallopeptidase domain 22	disintegrin and metalloproteinase domain-containing protein 22|a disintegrin and metalloproteinase domain 22|metalloproteinase-disintegrin ADAM22-3|metalloproteinase-like, disintegrin-like, and cysteine-rich protein 2	NM_001324417.1	NP_001311346.1	NC_000007.14	protein-coding	REVIEWED	7	+	87934142	88202888	Reference GRCh38.p12 Primary Assembly
hsa-mir-497_25g	NM_015946.4	1	516.8	516.8	0.0126	0.029	1	1	6.54e-06	13	1	0	8	248	0	0	184.8	0	0	21	2941	13	20	812	819	8	8	0	read	NM_015946.4	9606	53918	PELO	CGI-17|PRO1770	pelota mRNA surveillance and ribosome rescue factor	protein pelota homolog|pelota homolog	NM_015946.4	NP_057030.3	NC_000005.10	protein-coding	REVIEWED	5	+	52787939	52802616	Reference GRCh38.p12 Primary Assembly
hsa-mir-497_25g	NR_003063.1	1	840.2	840.2	7.67e-06	0.000427	8	8	0	6.5	1	1	21	240	8	0	230.2	0	0	21	1380	1	20	262	282	20	21	0	read	NR_003063.1	9606	54332	GDAP1	CMT4|CMT4A|CMTRIA	ganglioside induced differentiation associated protein 1	ganglioside-induced differentiation-associated protein 1|Charcot-Marie-Tooth neuropathy 4A	NM_018972.3	NP_061845.2	NC_000008.11	protein-coding	REVIEWED	8	+	74350382	74488866	Reference GRCh38.p12 Primary Assembly
hsa-mir-497_25g	NM_019008.5	2	1375.7	858.2	3.17e-07	2.1e-05	9	11	0	9	1	0	17	240	12	0	194.2	0	0	21	5767	4	20	2248	2264	17	17	0	read	NM_019008.5	9606	54471	MIEF1	HSU79252|MID51|SMCR7L|dJ1104E15.3	mitochondrial elongation factor 1	mitochondrial dynamics protein MID51|SMCR7-like protein|Smith-Magenis syndrome chromosome region, candidate 7-like|mitochondrial dynamic protein MID51|mitochondrial dynamic protein of 51 kDa|mitochondrial dynamics protein of 51 kDa|smith-Magenis syndrome chromosomal region candidate gene 7 protein-like	NM_019008.5	NP_061881.2	NC_000022.11	protein-coding	VALIDATED	22	+	39500099	39518133	Reference GRCh38.p12 Primary Assembly
hsa-mir-497_25g	NM_001190946.2	1	113.6	113.6	0.423	0.451	1	1	6.54e-06	7	1	0	18	-68	36	0	48.6	0	0	21	2994	1	18	603	620	18	18	11	read	NM_001190946.2	9606	54540	FAM193B	IRIZIO	family with sequence similarity 193 member B	protein FAM193B	NM_001190946.2	NP_001177875.1	NC_000005.10	protein-coding	VALIDATED	5	-	177519788	177554584	Reference GRCh38.p12 Primary Assembly
hsa-mir-497_25g	NM_001301064.1	1	558.6	558.6	0.000691	0.00778	2	2	3.54e-10	9	1	0	17	240	12	0	176.6	0	0	21	3706	4	20	1609	1625	17	17	0	read	NM_001301064.1	9606	54700	RRN3	A-270G1.2|TIFIA	RRN3 homolog, RNA polymerase I transcription factor	RNA polymerase I-specific transcription initiation factor RRN3|RRN3 RNA polymerase I transcription factor homolog|TIF-IA|transcription initiation factor IA|transcription initiation factor TIF-IA	NM_001301064.1	NP_001287993.1	NC_000016.10	protein-coding	VALIDATED	16	-	15060021	15094334	Reference GRCh38.p12 Primary Assembly
hsa-mir-497_25g	NM_001353210.1	1	886.3	886.3	1.14e-06	6.58e-05	9	11	0	10	1	0	12	240	0	0	231.3	0	0	21	4983	9	20	1821	1832	12	12	0	read	NM_001353210.1	9606	54808	DYM	DMC|SMC	dymeclin	dymeclin|dyggve-Melchior-Clausen syndrome protein	NM_001353210.1	NP_001340139.1	NC_000018.10	protein-coding	REVIEWED	18	-	49041473	49460732	Reference GRCh38.p12 Primary Assembly
hsa-mir-497_25g	NM_001159596.1	1	552.5	552.5	0.0027	0.00824	2	2	3.54e-10	13	1	0	9	240	0	0	193.5	0	0	21	3210	12	20	2810	2818	9	9	0	read	NM_001159596.1	9606	54841	BIVM	-	basic, immunoglobulin-like variable motif containing	basic immunoglobulin-like variable motif-containing protein	NM_001159596.1	NP_001153068.1	NC_000013.11	protein-coding	VALIDATED	13	+	102799048	102841537	Reference GRCh38.p12 Primary Assembly
hsa-mir-497_25g	NM_001164245.1	2	1067.1	549.9	0.015	0.04	1	1	6.54e-06	7.5	1	1	17	240	28	0	199.9	0	0	21	3857	4	20	1631	1646	17	16	0	read	NM_001164245.1	9606	54953	ODR4	C1orf27|TTG1|odr-4	odr-4 GPCR localization factor homolog	protein odr-4 homolog|LAG1-interacting protein|odorant response abnormal 4|transactivated by recombinant transforming growth factor beta|transactivated by recombinant transforming growth factor beta 1|transactivated by transforming growth factor beta protein 1	NM_001164245.1	NP_001157717.1	NC_000001.11	protein-coding	VALIDATED	1	+	186375757	186421374	Reference GRCh38.p12 Primary Assembly
hsa-mir-497_25g	NM_001317824.1	2	1326.7	846.9	0.000328	0.00724	7	10	0	8	1	0	17	252	12	0	245.9	0	0	21	2837	5	21	640	656	17	17	0	read	NM_001317824.1	9606	54974	THG1L	ICF45|IHG-1|hTHG1	tRNA-histidine guanylyltransferase 1 like	probable tRNA(His) guanylyltransferase|induced by high glucose-1|interphase cytoplasmic foci protein 45	NM_001317824.1	NP_001304753.1	NC_000005.10	protein-coding	REVIEWED	5	+	157731388	157741447	Reference GRCh38.p12 Primary Assembly
hsa-mir-497_25g	NM_017934.6	1	1286.8	1286.8	1.22e-10	2.44e-08	18	18	0	7	1	0	20	240	16	0	255.8	0	0	21	11987	1	20	3272	3291	20	20	0	read	NM_017934.6	9606	55023	PHIP	BRWD2|DCAF14|DIDOD|WDR11|ndrp	pleckstrin homology domain interacting protein	PH-interacting protein|DDB1 and CUL4 associated factor 14|IRS-1 PH domain-binding protein|WD repeat-containing protein 11	NM_017934.6	NP_060404.4	NC_000006.12	protein-coding	REVIEWED	6	-	78934418	79078297	Reference GRCh38.p12 Primary Assembly
hsa-mir-497_25g	NM_001039775.3	1	915.1	915.1	4.98e-07	2.98e-05	11	11	0	10.5	1	0	15	240	0	0	192.1	0	0	21	5245	6	20	5220	5234	15	15	0	read	NM_001039775.3	9606	55057	CRYBG2	AIM1L	crystallin beta-gamma domain containing 2	beta/gamma crystallin domain-containing protein 2|absent in melanoma 1 like|absent in melanoma 1-like protein|beta-gamma crystallin domain containing 2	NM_001039775.3	NP_001034864.2	NC_000001.11	protein-coding	VALIDATED	1	-	26321858	26354129	Reference GRCh38.p12 Primary Assembly
hsa-mir-497_25g	NM_018036.6	1	643.9	643.9	0.0255	0.0447	3	3	2.18e-14	13	1	0	9	240	0	0	244.9	0	0	21	13224	12	20	6896	6904	9	9	0	read	NM_018036.6	9606	55102	ATG2B	C14orf103	autophagy related 2B	autophagy-related protein 2 homolog B|ATG2 autophagy related 2 homolog B	NM_018036.6	NP_060506.5	NC_000014.9	protein-coding	REVIEWED	14	-	96279201	96363400	Reference GRCh38.p12 Primary Assembly
hsa-mir-497_25g	NM_001286247.1	1	631.7	631.7	0.00196	0.0231	2	3	4.77e-07	10.5	1	0	15	240	0	0	268.7	0	0	21	7526	6	20	1758	1772	15	15	0	read	NM_001286247.1	9606	55103	RALGPS2	dJ595C2.1	Ral GEF with PH domain and SH3 binding motif 2	ras-specific guanine nucleotide-releasing factor RalGPS2|Ral-A exchange factor RalGPS2|ral GEF with PH domain and SH3-binding motif 2|ralA exchange factor RalGPS2	NM_001286247.1	NP_001273176.1	NC_000001.11	protein-coding	VALIDATED	1	+	178725146	178921841	Reference GRCh38.p12 Primary Assembly
hsa-mir-497_25g	NM_018072.5	3	1792.3	729.3	0.00025	0.00805	5	5	0	8.5	1	1	16	240	0	0	249.3	0	0	21	8497	5	20	3051	3065	16	15	0	read	NM_018072.5	9606	55127	HEATR1	BAP28|UTP10	HEAT repeat containing 1	HEAT repeat-containing protein 1|U3 small nucleolar RNA-associated protein 10 homolog|UTP10, small subunit (SSU) processome component, homolog|protein BAP28	NM_018072.5	NP_060542.4	NC_000001.11	protein-coding	VALIDATED	1	-	236549004	236604540	Reference GRCh38.p12 Primary Assembly
hsa-mir-497_25g	NM_018086.3	1	514.9	514.9	0.0169	0.0415	1	1	6.54e-06	12	1	0	9	248	0	0	178.9	0	0	21	7210	12	20	299	307	9	9	0	read	NM_018086.3	9606	55137	FIGN	-	fidgetin, microtubule severing factor	fidgetin	NM_018086.3	NP_060556.2	NC_000002.12	protein-coding	VALIDATED	2	-	163602610	163736154	Reference GRCh38.p12 Primary Assembly
hsa-mir-497_25g	NM_001284220.1	1	596.3	596.3	0.00405	0.0172	1	1	6.54e-06	13	1	0	8	312	0	0	200.3	0	0	21	3135	14	21	231	238	8	8	0	read	NM_001284220.1	9606	55140	ELP3	KAT9	elongator acetyltransferase complex subunit 3	elongator complex protein 3|elongation protein 3 homolog	NM_001284220.1	NP_001271149.1	NC_000008.11	protein-coding	VALIDATED	8	+	28090230	28191152	Reference GRCh38.p12 Primary Assembly
hsa-mir-497_25g	NM_175748.3	1	806.5	806.5	0.000247	0.00498	8	9	0	8.5	1	0	19	240	12	0	185.5	0	0	21	3709	2	20	2298	2316	19	19	0	read	NM_175748.3	9606	55148	UBR7	C14orf130	ubiquitin protein ligase E3 component n-recognin 7 (putative)	putative E3 ubiquitin-protein ligase UBR7|N-recognin-7|RING-type E3 ubiquitin transferase UBR7	NM_175748.3	NP_786924.2	NC_000014.9	protein-coding	REVIEWED	14	+	93207055	93229214	Reference GRCh38.p12 Primary Assembly
hsa-mir-497_25g	NM_001286702.1	1	1334.3	1334.3	8.97e-14	1.27e-11	20	20	0	7.5	1	0	20	240	12	0	231.3	0	0	21	2861	1	20	2524	2543	20	20	0	read	NM_001286702.1	9606	55156	ARMC1	Arcp	armadillo repeat containing 1	armadillo repeat-containing protein 1	NM_001286702.1	NP_001273631.1	NC_000008.11	protein-coding	VALIDATED	8	-	65602455	65634216	Reference GRCh38.p12 Primary Assembly
hsa-mir-497_25g	NM_018124.3	2	1161.2	826.4	0.000118	0.00453	8	8	0	5.5	1	1	20	248	24	0	180.4	0	0	21	4952	1	20	1975	1993	20	19	0	read	NM_018124.3	9606	55159	RFWD3	FANCW|RNF201	ring finger and WD repeat domain 3	E3 ubiquitin-protein ligase RFWD3|RING finger and WD repeat domain-containing protein 3|RING finger protein 201|RING-type E3 ubiquitin transferase RFWD3	NM_018124.3	NP_060594.3	NC_000016.10	protein-coding	VALIDATED	16	-	74621395	74666891	Reference GRCh38.p12 Primary Assembly
hsa-mir-497_25g	NM_018129.3	2	1478.3	996.2	8.45e-07	8.94e-05	12	12	0	9.5	1	0	15	240	0	0	223.2	0	0	21	3482	6	20	2127	2141	15	15	0	read	NM_018129.3	9606	55163	PNPO	HEL-S-302|PDXPO	pyridoxamine 5'-phosphate oxidase	pyridoxine-5'-phosphate oxidase|epididymis secretory protein Li 302|pyridoxal 5'-phosphate synthase|pyridoxamine-phosphate oxidase|pyridoxine 5'-phosphate oxidase	NM_018129.3	NP_060599.1	NC_000017.11	protein-coding	REVIEWED	17	+	47941522	47949307	Reference GRCh38.p12 Primary Assembly
hsa-mir-497_25g	NM_001145417.1	1	550.4	550.4	0.00894	0.0186	1	1	6.54e-06	8	1	0	19	248	12	0	197.4	0	0	21	3895	2	20	2074	2092	19	19	0	read	NM_001145417.1	9606	55167	MSL2	MSL-2|MSL2L1|RNF184	MSL complex subunit 2	E3 ubiquitin-protein ligase MSL2|E3 ubiquitin-protein transferase MSL2|MSL2-like 1|male-specific lethal 2 homolog|male-specific lethal 2-like 1|male-specific lethal-2 homolog 1|ring finger protein 184	NM_001145417.1	NP_001138889.1	NC_000003.12	protein-coding	VALIDATED	3	-	136148917	136197299	Reference GRCh38.p12 Primary Assembly
hsa-mir-497_25g	NM_001352500.1	1	565.8	565.8	0.021	0.0477	1	1	6.54e-06	9	1	0	18	248	4	0	222.8	0	0	21	4036	3	20	2309	2326	18	18	0	read	NM_001352500.1	9606	55213	RCBTB1	CLLD7|CLLL7|GLP|RDEOA	RCC1 and BTB domain containing protein 1	RCC1 and BTB domain-containing protein 1|CLL deletion region gene 7 protein|GDP/GTP exchange factor (GEF)-like protein|chronic lymphocytic leukemia deletion region gene 7 protein|regulator of chromosome condensation (RCC1) and BTB (POZ) domain containing protein 1|regulator of chromosome condensation and BTB domain-containing protein 1	NM_001352500.1	NP_001339429.1	NC_000013.11	protein-coding	REVIEWED	13	-	49531943	49585586	Reference GRCh38.p12 Primary Assembly
hsa-mir-497_25g	NM_001345981.1	1	520.4	520.4	0.00157	0.0122	1	1	6.54e-06	7.5	1	0	17	248	24	0	147.4	0	0	21	3279	4	20	1033	1049	17	17	0	read	NM_001345981.1	9606	55295	KLHL26	-	kelch like family member 26	kelch-like protein 26|kelch-like 26	NM_001345981.1	NP_001332910.1	NC_000019.10	protein-coding	VALIDATED	19	+	18636964	18670498	Reference GRCh38.p12 Primary Assembly
hsa-mir-497_25g	NM_018420.2	1	591.3	591.3	0.00886	0.0243	1	1	6.54e-06	6.5	1	1	20	248	40	0	216.3	0	0	21	4729	1	20	1354	1372	20	19	0	read	NM_018420.2	9606	55356	SLC22A15	FLIPT1|PRO34686	solute carrier family 22 member 15	solute carrier family 22 member 15|flipt 1|fly-like putative organic ion transporter 1|fly-like putative transporter 1|solute carrier family 22 (organic cation transporter), member 15|trans-like protein	NM_018420.2	NP_060890.2	NC_000001.11	protein-coding	VALIDATED	1	+	115976497	116070053	Reference GRCh38.p12 Primary Assembly
hsa-mir-497_25g	NM_001346432.1	1	712.4	712.4	0.00134	0.0193	5	5	0	9	1	0	17	240	4	0	215.4	0	0	21	5168	4	20	2383	2399	17	17	0	read	NM_001346432.1	9606	55366	LGR4	BNMD17|GPR48	leucine rich repeat containing G protein-coupled receptor 4	leucine-rich repeat-containing G-protein coupled receptor 4|G protein-coupled receptor 48	NM_001346432.1	NP_001333361.1	NC_000011.10	protein-coding	REVIEWED	11	-	27365960	27472774	Reference GRCh38.p12 Primary Assembly
hsa-mir-497_25g	NM_001330253.1	1	615.1	615.1	0.000186	0.00308	1	1	6.54e-06	5.5	1	1	20	240	12	0	272.1	0	0	21	5800	1	20	4538	4556	20	19	0	read	NM_001330253.1	9606	55681	SCYL2	CVAK104	SCY1 like pseudokinase 2	SCY1-like protein 2|SCY1-like 2|SCY1-like, kinase-like 2|coated vesicle-associated kinase of 104 kDa	NM_001330253.1	NP_001317182.1	NC_000012.12	protein-coding	REVIEWED	12	+	100267139	100341723	Reference GRCh38.p12 Primary Assembly
hsa-mir-497_25g	NM_018047.2	1	572.2	572.2	0.00498	0.0197	2	5	0.000165	6.5	1	1	21	152	24	0	273.2	0	0	21	2352	1	20	1559	1579	20	21	0	read	NM_018047.2	9606	55696	RBM22	Cwc2|ZC3H16|fSAP47	RNA binding motif protein 22	pre-mRNA-splicing factor RBM22|functional spliceosome-associated protein 47|zinc finger CCCH domain-containing protein 16	NM_018047.2	NP_060517.1	NC_000005.10	protein-coding	REVIEWED	5	-	150690789	150701106	Reference GRCh38.p12 Primary Assembly
hsa-mir-497_25g	NM_001304793.1	1	635.1	635.1	0.000532	0.00855	2	2	3.54e-10	13	1	0	9	240	0	0	276.1	0	0	21	6434	12	20	5203	5211	9	9	0	read	NM_001304793.1	9606	55776	SAYSD1	C6orf64	SAYSVFN motif domain containing 1	SAYSvFN domain-containing protein 1	NM_001304793.1	NP_001291722.1	NC_000006.12	protein-coding	VALIDATED	6	-	39104062	39115185	Reference GRCh38.p12 Primary Assembly
hsa-mir-497_25g	NM_018416.2	1	665.4	665.4	0.000204	0.00285	1	1	6.54e-06	8	1	0	17	312	24	0	230.4	0	0	21	5499	5	21	2951	2967	17	17	0	read	NM_018416.2	9606	55810	FOXJ2	FHX	forkhead box J2	forkhead box protein J2|FOXJ2 forkhead factor|fork head homologous X	NM_018416.2	NP_060886.1	NC_000012.12	protein-coding	VALIDATED	12	+	8032679	8055521	Reference GRCh38.p12 Primary Assembly
hsa-mir-497_25g	NM_018451.4	1	270.5	270.5	0.295	0.326	1	1	6.54e-06	7	1	0	17	0	132	0	39.5	0	0	21	5129	1	17	452	468	17	17	12	read	NM_018451.4	9606	55835	CENPJ	BM032|CENP-J|CPAP|LAP|LIP1|MCPH6|SASS4|SCKL4|Sas-4	centromere protein J	centromere protein J|LAG-3-associated protein|LYST-interacting protein 1|LYST-interacting protein LIP1|LYST-interacting protein LIP7|centrosomal P4.1-associated protein	NM_018451.4	NP_060921.3	NC_000013.11	protein-coding	REVIEWED	13	-	24882273	24922888	Reference GRCh38.p12 Primary Assembly
hsa-mir-497_25g	NM_001100624.2	1	587.8	587.8	0.00318	0.0185	1	1	6.54e-06	4.5	1	1	21	240	12	0	237.8	0	0	21	4663	1	20	971	991	20	21	0	read	NM_001100624.2	9606	55839	CENPN	BM039|C16orf60|CENP-N|ICEN32	centromere protein N	centromere protein N|interphase centromere complex protein 32	NM_001100624.2	NP_001094094.2	NC_000016.10	protein-coding	REVIEWED	16	+	81006497	81033106	Reference GRCh38.p12 Primary Assembly
hsa-mir-497_25g	NM_019108.3	1	995	995	5.48e-07	4.22e-05	12	12	0	8.5	1	0	16	240	0	0	218	0	0	21	5566	5	20	1301	1316	16	16	0	read	NM_019108.3	9606	56006	SMG9	C19orf61|F17127_1|HBMS	SMG9, nonsense mediated mRNA decay factor	protein SMG9|protein smg-9 homolog	NM_019108.3	NP_061981.2	NC_000019.10	protein-coding	REVIEWED	19	-	43727991	43755035	Reference GRCh38.p12 Primary Assembly
hsa-mir-497_25g	NM_078469.2	1	1688	1688	4.76e-11	7.85e-09	30	31	0	9.5	1	0	16	248	0	0	191	0	0	21	2373	5	20	1419	1434	16	16	0	read	NM_078469.2	9606	56647	BCCIP	TOK-1|TOK1	BRCA2 and CDKN1A interacting protein	BRCA2 and CDKN1A-interacting protein|BCCIPalpha|BCCIPbeta|BRCA2 and Cip1/p21 interacting protein|TOK-1alpha|TOK-1beta|cdk inhibitor p21 binding protein|p21- and CDK-associated protein 1|protein TOK-1	NM_078469.2	NP_510869.1	NC_000010.11	protein-coding	REVIEWED	10	+	125823534	125853694	Reference GRCh38.p12 Primary Assembly
hsa-mir-497_25g	NM_001163812.1	1	1019.7	1019.7	1.1e-09	1.26e-07	13	13	0	6	1	0	18	248	24	0	155.7	0	0	21	3684	3	20	3581	3598	18	18	0	read	NM_001163812.1	9606	56652	TWNK	ATXN8|C10orf2|IOSCA|MTDPS7|PEO|PEO1|PEOA3|PRLTS5|SANDO|SCA8|TWINL	twinkle mtDNA helicase	twinkle protein, mitochondrial|T7 gp4-like protein with intramitochondrial nucleoid localization|T7 helicase-related protein with intramitochondrial nucleoid localization|T7-like mitochondrial DNA helicase|ataxin 8|mitochondrial twinkle protein|progressive external ophthalmoplegia 1 protein	NM_001163812.1	NP_001157284.1	NC_000010.11	protein-coding	REVIEWED	10	+	100987526	100994402	Reference GRCh38.p12 Primary Assembly
hsa-mir-497_25g	NM_020135.2	1	884.3	884.3	3.65e-05	0.00178	10	10	0	9	1	0	18	240	16	0	184.3	0	0	21	2670	3	20	1857	1874	18	18	0	read	NM_020135.2	9606	56897	WRNIP1	WHIP|bA420G6.2	Werner helicase interacting protein 1	ATPase WRNIP1|putative helicase RUVBL	NM_020135.2	NP_064520.2	NC_000006.12	protein-coding	REVIEWED	6	+	2765340	2785744	Reference GRCh38.p12 Primary Assembly
hsa-mir-497_25g	NM_001286555.1	1	898.8	898.8	0.0001	0.00213	10	10	0	7	1	0	20	240	16	0	187.8	0	0	21	3518	1	20	1523	1542	20	20	0	read	NM_001286555.1	9606	56940	DUSP22	JKAP|JSP-1|JSP1|LMW-DSP2|LMWDSP2|MKP-x|MKPX|VHX	dual specificity phosphatase 22	dual specificity protein phosphatase 22|JNK-stimulating phosphatase 1|JNK-stimulatory phosphatase-1|MAP kinase phosphatase x|homolog of mouse dual specificity phosphatase LMW-DSP2|low molecular weight dual specificity phosphatase 2|mitogen-activated protein kinase phosphatase x	NM_001286555.1	NP_001273484.1	NC_000006.12	protein-coding	VALIDATED	6	+	292056	351354	Reference GRCh38.p12 Primary Assembly
hsa-mir-497_25g	NM_001127893.1	1	537.4	537.4	0.0173	0.0331	1	1	6.54e-06	13	1	0	8	312	0	0	141.4	0	0	21	2265	14	21	981	988	8	8	0	read	NM_001127893.1	9606	56971	CEACAM19	CEACM19|CEAL1	carcinoembryonic antigen related cell adhesion molecule 19	carcinoembryonic antigen-related cell adhesion molecule 19|carcinoembryonic antigen-like 1	NM_001127893.1	NP_001121365.1	NC_000019.10	protein-coding	VALIDATED	19	+	44671451	44684354	Reference GRCh38.p12 Primary Assembly
hsa-mir-497_25g	NM_001038702.1	1	607.2	607.2	0.00392	0.0124	2	3	4.77e-07	8	1	0	20	240	12	0	229.2	0	0	21	3498	1	20	1188	1207	20	20	0	read	NM_001038702.1	9606	56990	CDC42SE2	SPEC2	CDC42 small effector 2	CDC42 small effector protein 2|non-kinase Cdc42 effector protein SPEC2|small effector of CDC42 protein 2	NM_001038702.1	NP_001033791.1	NC_000005.10	protein-coding	VALIDATED	5	+	131264008	131394689	Reference GRCh38.p12 Primary Assembly
hsa-mir-497_25g	NM_020247.4	1	568.7	568.7	0.00149	0.00971	1	2	0.00175	4	1	2	22	312	28	0	137.7	0	0	21	2932	2	21	1742	1763	20	22	0	read	NM_020247.4	9606	56997	COQ8A	ADCK3|ARCA2|CABC1|COQ10D4|COQ8|SCAR9	coenzyme Q8A	atypical kinase COQ8A, mitochondrial|aarF domain-containing protein kinase 3|atypical kinase ADCK3, mitochondrial|chaperone activity of bc1 complex-like, mitochondrial|chaperone, ABC1 activity of bc1 complex homolog|coenzyme Q protein 8A|coenzyme Q8 homolog	NM_020247.4	NP_064632.2	NC_000001.11	protein-coding	REVIEWED	1	+	226939338	226987544	Reference GRCh38.p12 Primary Assembly
hsa-mir-497_25g	NM_001318781.1	2	1080	599.4	0.00108	0.013	1	1	6.54e-06	9	1	0	18	240	12	0	264.4	0	0	21	7251	3	20	6317	6334	18	18	0	read	NM_001318781.1	9606	56999	ADAMTS9	-	ADAM metallopeptidase with thrombospondin type 1 motif 9	A disintegrin and metalloproteinase with thrombospondin motifs 9|a disintegrin-like and metalloprotease (reprolysin type) with thrombospondin type 1 motif, 9	NM_001318781.1	NP_001305710.1	NC_000003.12	protein-coding	REVIEWED	3	-	64515653	64687999	Reference GRCh38.p12 Primary Assembly
hsa-mir-497_25g	NM_020315.4	1	570	570	0.000123	0.0018	2	2	3.54e-10	7.5	1	0	20	240	24	0	171	0	0	21	2072	1	20	1120	1139	20	20	0	read	NM_020315.4	9606	57026	PDXP	CIN|PLP|dJ37E16.5	pyridoxal phosphatase	pyridoxal phosphate phosphatase|PLP phosphatase|chronophin|pyridoxal (pyridoxine, vitamin B6) phosphatase|testicular secretory protein Li 36	NM_020315.4	NP_064711.1	NC_000022.11	protein-coding	VALIDATED	22	+	37658729	37666931	Reference GRCh38.p12 Primary Assembly
hsa-mir-497_25g	NM_001080431.2	2	1262.5	1261.5	4.31e-12	3.65e-10	18	18	0	13	1	0	9	240	0	0	262.5	0	0	21	6991	12	20	3383	3391	9	9	0	read	NM_001080431.2	9606	57210	SLC45A4	-	solute carrier family 45 member 4	solute carrier family 45 member 4	NM_001080431.2	NP_001073900.1	NC_000008.11	protein-coding	VALIDATED	8	-	141207165	141308320	Reference GRCh38.p12 Primary Assembly
hsa-mir-497_25g	NM_001144060.1	2	1046.4	560.6	0.0108	0.0225	2	2	3.54e-10	10.5	1	0	18	152	8	0	285.6	0	0	21	7011	3	20	6820	6837	18	18	0	read	NM_001144060.1	9606	57224	NHSL1	C6orf63	NHS like 1	NHS-like protein 1	NM_001144060.1	NP_001137532.1	NC_000006.12	protein-coding	VALIDATED	6	-	138422042	138692615	Reference GRCh38.p12 Primary Assembly
hsa-mir-497_25g	NM_016252.3	2	808	759.2	0.000415	0.0102	5	6	0	4	1	1	21	240	20	0	243.2	0	0	21	15718	1	20	858	878	20	21	0	read	NM_016252.3	9606	57448	BIRC6	APOLLON|BRUCE	baculoviral IAP repeat containing 6	baculoviral IAP repeat-containing protein 6|BIR repeat-containing ubiquitin-conjugating enzyme|RING-type E3 ubiquitin transferase BIRC6|ubiquitin-conjugating BIR-domain enzyme apollon	NM_016252.3	NP_057336.3	NC_000002.12	protein-coding	REVIEWED	2	+	32356906	32618898	Reference GRCh38.p12 Primary Assembly
hsa-mir-497_25g	NM_020699.3	1	789.7	789.7	0.00334	0.0344	4	5	7.11e-15	12	1	0	10	312	0	0	272.7	0	0	21	7312	12	21	5491	5500	10	10	0	read	NM_020699.3	9606	57459	GATAD2B	MRD18|P66beta|p68	GATA zinc finger domain containing 2B	transcriptional repressor p66-beta|GATA zinc finger domain-containing protein 2B|transcription repressor p66 beta component of the MeCP1 complex	NM_020699.3	NP_065750.1	NC_000001.11	protein-coding	REVIEWED	1	-	153804906	153923952	Reference GRCh38.p12 Primary Assembly
hsa-mir-497_25g	NM_001199107.1	2	1668.5	1184.5	4.29e-09	5.07e-07	16	19	0	8	1	0	21	312	4	0	183.5	0	0	21	6607	1	21	1762	1782	21	21	0	read	NM_001199107.1	9606	57465	TBC1D24	DFNA65|DFNB86|DOORS|EIEE16|FIME|TLDC6	TBC1 domain family member 24	TBC1 domain family member 24|TBC/LysM-associated domain containing 6|skywalker homolog	NM_001199107.1	NP_001186036.1	NC_000016.10	protein-coding	REVIEWED	16	+	2475103	2509668	Reference GRCh38.p12 Primary Assembly
hsa-mir-497_25g	NM_001348729.1	2	1143.4	599	0.000274	0.00414	1	1	6.54e-06	5.5	1	0	19	240	44	0	203	0	0	21	7387	2	20	3873	3891	19	19	0	read	NM_001348729.1	9606	57498	KIDINS220	ARMS|SINO	kinase D interacting substrate 220	kinase D-interacting substrate of 220 kDa|ankyrin repeat-rich membrane-spanning protein|kinase D-interacting substrate 220kDa	NM_001348729.1	NP_001335658.1	NC_000002.12	protein-coding	REVIEWED	2	-	8721133	8837638	Reference GRCh38.p12 Primary Assembly
hsa-mir-497_25g	NM_020755.3	1	649.5	649.5	0.00262	0.0214	4	4	0	8.5	1	1	19	160	8	0	285.5	0	0	21	3218	3	20	1854	1872	18	19	0	read	NM_020755.3	9606	57515	SERINC1	TDE1L|TDE2|TMS-2|TMS2	serine incorporator 1	serine incorporator 1|tumor differentially expressed protein 2	NM_020755.3	NP_065806.1	NC_000006.12	protein-coding	VALIDATED	6	-	122443347	122471880	Reference GRCh38.p12 Primary Assembly
hsa-mir-497_25g	NM_001292003.1	1	578.5	578.5	0.0135	0.0299	1	1	6.54e-06	7.5	1	1	20	240	8	0	251.5	0	0	21	5680	1	20	1069	1087	20	19	0	read	NM_001292003.1	9606	57563	KLHL8	-	kelch like family member 8	kelch-like protein 8|kelch-like 8	NM_001292003.1	NP_001278932.1	NC_000004.12	protein-coding	VALIDATED	4	-	87160102	87220607	Reference GRCh38.p12 Primary Assembly
hsa-mir-497_25g	NM_020859.3	2	1103	581.2	0.00435	0.0184	1	1	6.54e-06	7	1	0	20	312	24	0	146.2	0	0	21	11023	2	21	2326	2345	20	20	0	read	NM_020859.3	9606	57619	SHROOM3	APXL3|MSTP013|SHRM|ShrmL	shroom family member 3	protein Shroom3|F-actin-binding protein|shroom-related protein	NM_020859.3	NP_065910.3	NC_000004.12	protein-coding	REVIEWED	4	+	76435099	76783252	Reference GRCh38.p12 Primary Assembly
hsa-mir-497_25g	NM_020890.2	1	593.2	593.2	0.00595	0.0253	3	3	2.18e-14	13	1	0	9	240	0	0	194.2	0	0	21	4284	12	20	1433	1441	9	9	0	read	NM_020890.2	9606	57650	CIP2A	KIAA1524|p90	cell proliferation regulating inhibitor of protein phosphatase 2A	protein CIP2A|cancerous inhibitor of PP2A|cancerous inhibitor of protein phosphatase 2A|p90 autoantigen	NM_020890.2	NP_065941.2	NC_000003.12	protein-coding	VALIDATED	3	-	108545751	108589643	Reference GRCh38.p12 Primary Assembly
hsa-mir-497_25g	NM_001293274.1	3	1553.1	598.1	0.0123	0.0285	2	2	3.54e-10	8.5	1	0	20	240	8	0	224.1	0	0	21	5553	1	20	3614	3633	20	20	0	read	NM_001293274.1	9606	57685	CACHD1	-	cache domain containing 1	VWFA and cache domain-containing protein 1|cache domain-containing protein 1|von Willebrand factor type A and cache domain containing 1	NM_001293274.1	NP_001280203.1	NC_000001.11	protein-coding	VALIDATED	1	+	64470792	64693057	Reference GRCh38.p12 Primary Assembly
hsa-mir-497_25g	NM_020935.2	1	563.4	563.4	0.0126	0.0287	1	1	6.54e-06	5.5	1	1	21	252	12	0	211.4	0	0	21	8032	1	21	3197	3216	21	20	0	read	NM_020935.2	9606	57695	USP37	-	ubiquitin specific peptidase 37	ubiquitin carboxyl-terminal hydrolase 37|deubiquitinating enzyme 37|tmp_locus_50|ubiquitin specific protease 37|ubiquitin thioesterase 37|ubiquitin thiolesterase 37|ubiquitin-specific-processing protease 37	NM_020935.2	NP_065986.2	NC_000002.12	protein-coding	VALIDATED	2	-	218450250	218568392	Reference GRCh38.p12 Primary Assembly
hsa-mir-497_25g	NM_001303229.1	1	562.7	562.7	0.102	0.122	1	1	6.54e-06	8.5	1	0	20	240	8	0	225.7	0	0	21	2898	1	20	2385	2404	20	20	0	read	NM_001303229.1	9606	58497	PRUNE1	DRES-17|DRES17|H-PRUNE|HTCD37|NMIHBA|PRUNE	prune exopolyphosphatase 1	exopolyphosphatase PRUNE1|Drosophila-related expressed sequence 17|protein prune homolog|protein prune homolog 1	NM_001303229.1	NP_001290158.1	NC_000001.11	protein-coding	REVIEWED	1	+	151008390	151035712	Reference GRCh38.p12 Primary Assembly
hsa-mir-497_25g	NM_021627.2	1	590	590	0.000752	0.00265	2	2	3.54e-10	7.5	1	0	20	240	8	0	209	0	0	21	3207	1	20	353	372	20	20	0	read	NM_021627.2	9606	59343	SENP2	AXAM2|SMT3IP2	SUMO specific peptidase 2	sentrin-specific protease 2|SMT3-specific isopeptidase 2|SUMO1/sentrin/SMT3 specific peptidase 2|SUMO1/sentrin/SMT3 specific protease 2|sentrin (SUMO1) specific peptidase 2|sentrin/SUMO-specific protease SENP2	NM_021627.2	NP_067640.2	NC_000003.12	protein-coding	VALIDATED	3	+	185586242	185631100	Reference GRCh38.p12 Primary Assembly
hsa-mir-497_25g	NM_001242828.1	1	369.5	369.5	0.027	0.047	3	10	0.000143	5	1	0	20	112	12	0	54.5	0	0	21	3119	1	20	2980	2999	20	20	12	read	NM_001242828.1	9606	60481	ELOVL5	HELO1|SCA38|dJ483K16.1	ELOVL fatty acid elongase 5	elongation of very long chain fatty acids protein 5|3-keto acyl-CoA synthase ELOVL5|ELOVL FA elongase 5|ELOVL family member 5, elongation of long chain fatty acids (FEN1/Elo2, SUR4/Elo3-like, yeast)|fatty acid elongase 1|homolog of yeast long chain polyunsaturated fatty acid elongation enzyme 2|spinocerebellar ataxia 38|very long chain 3-ketoacyl-CoA synthase 5|very long chain 3-oxoacyl-CoA synth…	NM_001242828.1	NP_001229757.1	NC_000006.12	protein-coding	REVIEWED	6	-	53267397	53349178	Reference GRCh38.p12 Primary Assembly
hsa-mir-497_25g	NM_001190809.1	1	601.9	601.9	0.00109	0.00514	2	2	3.54e-10	13	1	0	9	240	0	0	242.9	0	0	21	3243	12	20	154	162	9	9	0	read	NM_001190809.1	9606	60625	DHX35	C20orf15|DDX35|KAIA0875	DEAH-box helicase 35	probable ATP-dependent RNA helicase DHX35|DEAD/H (Asp-Glu-Ala-Asp/His) box polypeptide 35|DEAH (Asp-Glu-Ala-His) box polypeptide 35|DEAH-box protein 35	NM_001190809.1	NP_001177738.1	NC_000020.11	protein-coding	REVIEWED	20	+	38962337	39039722	Reference GRCh38.p12 Primary Assembly
hsa-mir-497_25g	NM_001184772.2	1	1139.4	1139.4	7.1e-09	4.57e-07	16	16	0	11.5	1	0	12	240	0	0	213.4	0	0	21	7349	9	20	2769	2780	12	12	0	read	NM_001184772.2	9606	63035	BCORL1	BCoR-L1|CXorf10	BCL6 corepressor like 1	BCL-6 corepressor-like protein 1|BCoR-like protein 1	NM_001184772.2	NP_001171701.1	NC_000023.11	protein-coding	REVIEWED	X	+	129980284	130058082	Reference GRCh38.p12 Primary Assembly
hsa-mir-497_25g	NM_001304803.1	1	717.3	717.3	0.00209	0.0123	5	5	0	13	1	0	9	240	0	0	238.3	0	0	21	2335	12	20	184	192	9	9	0	read	NM_001304803.1	9606	63826	SRR	ILV1|ISO1	serine racemase	serine racemase|D-serine ammonia-lyase|D-serine dehydratase|L-serine ammonia-lyase|L-serine dehydratase	NM_001304803.1	NP_001291732.1	NC_000017.11	protein-coding	VALIDATED	17	+	2303370	2325266	Reference GRCh38.p12 Primary Assembly
hsa-mir-497_25g	NM_001286631.1	1	1913	1913	5.49e-08	5.39e-06	35	45	0	9.5	1	0	15	240	0	0	219	0	0	21	5230	6	20	1422	1436	15	15	0	read	NM_001286631.1	9606	64062	RBM26	ARRS2|C13orf10|PPP1R132|PRO1777|SE70-2|ZC3H17	RNA binding motif protein 26	RNA-binding protein 26|CTCL tumor antigen se70-2|acidic rich RS domain containing 2|cutaneous T-cell lymphoma tumor antigen se70-2|protein phosphatase 1, regulatory 132	NM_001286631.1	NP_001273560.1	NC_000013.11	protein-coding	VALIDATED	13	-	79311826	79406220	Reference GRCh38.p12 Primary Assembly
hsa-mir-497_25g	NM_022132.4	1	587.1	587.1	0.00397	0.0177	1	1	6.54e-06	10.5	1	0	16	240	0	0	265.1	0	0	21	3696	5	20	1300	1315	16	16	0	read	NM_022132.4	9606	64087	MCCC2	MCCB	methylcrotonoyl-CoA carboxylase 2	methylcrotonoyl-CoA carboxylase beta chain, mitochondrial|3-methylcrotonyl-CoA carboxylase 2|3-methylcrotonyl-CoA carboxylase non-biotin-containing subunit|3-methylcrotonyl-CoA:carbon dioxide ligase subunit beta|MCCase subunit beta|biotin carboxylase|methylcrotonoyl-CoA carboxylase 2 (beta)|methylcrotonoyl-Coenzyme A carboxylase 2 (beta)|non-biotin containing subunit of 3-methylcrotonyl-CoA carbo…	NM_022132.4	NP_071415.1	NC_000005.10	protein-coding	REVIEWED	5	+	71587287	71658705	Reference GRCh38.p12 Primary Assembly
hsa-mir-497_25g	NM_022151.4	1	3118.1	3118.1	0	0	65	70	0	8.5	1	0	15	248	0	0	210.1	0	0	21	2435	6	20	1511	1525	15	15	0	read	NM_022151.4	9606	64112	MOAP1	MAP-1|PNMA4	modulator of apoptosis 1	modulator of apoptosis 1|MAP1|paraneoplastic Ma antigen family member 4|paraneoplastic antigen Ma4|paraneoplastic antigen like 4	NM_022151.4	NP_071434.2	NC_000014.9	protein-coding	REVIEWED	14	-	93182195	93184903	Reference GRCh38.p12 Primary Assembly
hsa-mir-497_25g	NM_001040284.2	1	555.4	555.4	0.0221	0.0407	1	1	6.54e-06	9	1	0	18	152	24	0	295.4	0	0	21	8114	3	20	4184	4201	18	18	0	read	NM_001040284.2	9606	64282	TENT4B	PAPD5|TRF4-2|TUT3	terminal nucleotidyltransferase 4B	non-canonical poly(A) RNA polymerase PAPD5|PAP associated domain containing 5|PAP-associated domain-containing protein 5|TUTase 3|poly(A) RNA polymerase D5, non-canonical|terminal uridylyltransferase 3|topoisomerase-related function protein 4-2	NM_001040284.2	NP_001035374.2	NC_000016.10	protein-coding	VALIDATED	16	+	50152917	50235309	Reference GRCh38.p12 Primary Assembly
hsa-mir-497_25g	NM_001126129.1	1	516.8	516.8	0.0185	0.0306	1	1	6.54e-06	7.5	1	0	21	244	40	0	138.8	0	0	21	2414	1	21	287	307	21	21	0	read	NM_001126129.1	9606	64785	GINS3	PSF3	GINS complex subunit 3	DNA replication complex GINS protein PSF3|GINS complex subunit 3 (Psf3 homolog)	NM_001126129.1	NP_001119601.1	NC_000016.10	protein-coding	REVIEWED	16	+	58392393	58406143	Reference GRCh38.p12 Primary Assembly
hsa-mir-497_25g	NM_001345975.1	1	633.1	633.1	0.00191	0.0191	3	3	2.18e-14	13	1	0	8	248	0	0	221.1	0	0	21	6143	13	20	1080	1087	8	8	0	read	NM_001345975.1	9606	64848	YTHDC2	CAHL	YTH domain containing 2	probable ATP-dependent RNA helicase YTHDC2|CsA-associated helicase-like protein	NM_001345975.1	NP_001332904.1	NC_000005.10	protein-coding	REVIEWED	5	+	113513661	113595286	Reference GRCh38.p12 Primary Assembly
hsa-mir-497_25g	NM_001318151.1	1	537.5	537.5	0.00173	0.00915	1	1	6.54e-06	8	1	0	20	240	16	0	191.5	0	0	21	1058	1	20	936	955	20	20	0	read	NM_001318151.1	9606	64976	MRPL40	L40mt|MRP-L22|MRP-L40|MRPL22|NLVCF|URIM	mitochondrial ribosomal protein L40	39S ribosomal protein L40, mitochondrial|mitochondrial large ribosomal subunit protein mL40|nuclear localization signal-containing protein deleted in velocardiofacial syndrome|up-regulated in metastasis	NM_001318151.1	NP_001305080.1	NC_000022.11	protein-coding	REVIEWED	22	+	19431901	19436077	Reference GRCh38.p12 Primary Assembly
hsa-mir-497_25g	NM_023012.5	1	639.4	639.4	0.00177	0.00891	3	4	6.65e-11	8	1	1	20	240	16	0	221.4	0	0	21	2349	2	20	984	1003	19	20	0	read	NM_023012.5	9606	65117	RSRC2	-	arginine and serine rich coiled-coil 2	arginine/serine-rich coiled-coil protein 2|arginine/serine-rich coiled-coil 2	NM_023012.5	NP_075388.2	NC_000012.12	protein-coding	VALIDATED	12	-	122504642	122527012	Reference GRCh38.p12 Primary Assembly
hsa-mir-497_25g	NM_001002259.2	1	555.7	555.7	0.00737	0.0238	2	2	3.54e-10	7.5	1	0	19	240	16	0	166.7	0	0	21	4501	2	20	2487	2505	19	19	0	read	NM_001002259.2	9606	65981	CAPRIN2	C1QDC1|EEG-1|EEG1|RNG140	caprin family member 2	caprin-2|C1q domain-containing protein 1|RNA granule protein 140|cytoplasmic activation/proliferation-associated protein 2|gastric cancer multidrug resistance-associated protein	NM_001002259.2	NP_001002259.1	NC_000012.12	protein-coding	REVIEWED	12	-	30709551	30754992	Reference GRCh38.p12 Primary Assembly
hsa-mir-497_25g	NM_001204856.1	1	1943.6	1943.6	0	0	35	35	0	6.5	1	1	17	312	28	0	152.6	0	0	21	2085	5	21	551	566	17	16	0	read	NM_001204856.1	9606	79005	SCNM1	-	sodium channel modifier 1	sodium channel modifier 1	NM_001204856.1	NP_001191785.1	NC_000001.11	protein-coding	VALIDATED	1	+	151166021	151170296	Reference GRCh38.p12 Primary Assembly
hsa-mir-497_25g	NM_001129994.1	1	600.3	600.3	0.0064	0.0171	1	1	6.54e-06	11	1	0	11	312	0	0	197.3	0	0	21	3936	11	21	1795	1805	11	11	0	read	NM_001129994.1	9606	79047	KCTD15	-	potassium channel tetramerization domain containing 15	BTB/POZ domain-containing protein KCTD15|potassium channel tetramerisation domain containing 15|potassium channel tetramerization domain-containing protein 15	NM_001129994.1	NP_001123466.1	NC_000019.10	protein-coding	VALIDATED	19	+	33795539	33815760	Reference GRCh38.p12 Primary Assembly
hsa-mir-497_25g	NM_001130721.1	1	591.3	591.3	0.0133	0.0293	1	1	6.54e-06	10	1	0	14	240	0	0	260.3	0	0	21	3189	7	20	239	252	14	14	0	read	NM_001130721.1	9606	79071	ELOVL6	FACE|FAE|LCE	ELOVL fatty acid elongase 6	elongation of very long chain fatty acids protein 6|3-keto acyl-CoA synthase ELOVL6|ELOVL FA elongase 6|ELOVL family member 6, elongation of long chain fatty acids (FEN1/Elo2, SUR4/Elo3-like, yeast)|fatty acid elongase 2|fatty acyl-CoA elongase|hELO2|long-chain fatty-acyl elongase|very long chain 3-ketoacyl-CoA synthase 6|very long chain 3-oxoacyl-CoA synthase 6	NM_001130721.1	NP_001124193.1	NC_000004.12	protein-coding	VALIDATED	4	-	110045850	110199198	Reference GRCh38.p12 Primary Assembly
hsa-mir-497_25g	NM_001077416.2	2	847.3	719.4	0.00203	0.0122	5	5	0	7.5	1	1	18	240	28	0	203.4	0	0	21	3018	4	20	805	822	17	18	0	read	NM_001077416.2	9606	79583	TMEM231	ALYE870|JBTS20|MKS11|PRO1886	transmembrane protein 231	transmembrane protein 231	NM_001077416.2	NP_001070884.2	NC_000016.10	protein-coding	REVIEWED	16	-	75538116	75556285	Reference GRCh38.p12 Primary Assembly
hsa-mir-497_25g	NM_001324266.1	1	568.8	568.8	0.0462	0.0639	2	2	3.54e-10	13	1	0	9	240	0	0	209.8	0	0	21	8877	12	20	775	783	9	9	0	read	NM_001324266.1	9606	79627	OGFRL1	dJ331H24.1	opioid growth factor receptor like 1	opioid growth factor receptor-like protein 1	NM_001324266.1	NP_001311195.1	NC_000006.12	protein-coding	VALIDATED	6	+	71288295	71309058	Reference GRCh38.p12 Primary Assembly
hsa-mir-497_25g	NM_001354210.1	2	1080.5	554.8	0.0178	0.0569	1	1	6.54e-06	12	1	0	12	244	0	0	229.8	0	0	21	4582	10	21	1202	1213	12	12	0	read	NM_001354210.1	9606	79642	ARSJ	ASJ	arylsulfatase family member J	arylsulfatase J	NM_001354210.1	NP_001341139.1	NC_000004.12	protein-coding	VALIDATED	4	-	113899928	113980463	Reference GRCh38.p12 Primary Assembly
hsa-mir-497_25g	NM_001304833.1	2	629	562	0.0046	0.0126	1	1	6.54e-06	11	1	0	10	320	0	0	148	0	0	21	1797	12	21	1005	1014	10	10	0	read	NM_001304833.1	9606	79676	OGFOD2	-	2-oxoglutarate and iron dependent oxygenase domain containing 2	2-oxoglutarate and iron-dependent oxygenase domain-containing protein 2	NM_001304833.1	NP_001291762.1	NC_000012.12	protein-coding	VALIDATED	12	+	122974702	122980040	Reference GRCh38.p12 Primary Assembly
hsa-mir-497_25g	NM_024658.3	2	1064.7	540.4	0.00795	0.0238	1	1	6.54e-06	6	1	1	20	240	24	0	187.4	0	0	21	3606	1	20	3492	3510	20	19	0	read	NM_024658.3	9606	79711	IPO4	Imp4	importin 4	importin-4|imp4b|importin-4b|ran-binding protein 4|ranBP4	NM_024658.3	NP_078934.3	NC_000014.9	protein-coding	VALIDATED	14	-	24180218	24188917	Reference GRCh38.p12 Primary Assembly
hsa-mir-497_25g	NM_001031719.2	2	1234.3	758.4	0.000243	0.00437	5	5	0	8	1	0	19	240	12	0	259.4	0	0	21	1403	2	20	390	408	19	19	0	read	NM_001031719.2	9606	79758	DHRS12	SDR40C1	dehydrogenase/reductase 12	dehydrogenase/reductase SDR family member 12|dehydrogenase/reductase (SDR family) member 12|short-chain dehydrogenase/reductase family 40C member 1	NM_001031719.2	NP_001026889.1	NC_000013.11	protein-coding	REVIEWED	13	-	51767992	51804161	Reference GRCh38.p12 Primary Assembly
hsa-mir-497_25g	NM_024734.3	2	1306	771.3	0.00015	0.003	5	5	0	7.5	1	0	19	240	44	0	231.3	0	0	21	12750	2	20	12160	12178	19	19	0	read	NM_024734.3	9606	79789	CLMN	-	calmin	calmin|calmin (calponin-like, transmembrane)|calponin-like transmembrane domain protein	NM_024734.3	NP_079010.2	NC_000014.9	protein-coding	VALIDATED	14	-	95181938	95319907	Reference GRCh38.p12 Primary Assembly
hsa-mir-497_25g	NM_001348022.1	1	1716.2	1716.2	6.78e-12	1.3e-09	30	30	0	8.5	1	0	16	240	0	0	221.2	0	0	21	4110	5	20	3987	4002	16	16	0	read	NM_001348022.1	9606	80095	ZNF606	ZNF328	zinc finger protein 606	zinc finger protein 606|zinc finger protein 328	NM_001348022.1	NP_001334951.1	NC_000019.10	protein-coding	REVIEWED	19	-	57977052	58003345	Reference GRCh38.p12 Primary Assembly
hsa-mir-497_25g	NM_057175.4	1	630.5	630.5	0.00546	0.0211	2	2	3.54e-10	12	1	0	12	244	0	0	265.5	0	0	21	5609	10	21	1191	1202	12	12	0	read	NM_057175.4	9606	80155	NAA15	Ga19|MRD50|NARG1|NAT1P|NATH|TBDN|TBDN100	N(alpha)-acetyltransferase 15, NatA auxiliary subunit	N-alpha-acetyltransferase 15, NatA auxiliary subunit|N-terminal acetyltransferase|NMDA receptor regulated 1|NMDA receptor-regulated protein 1|gastric cancer antigen Ga19|protein tubedown-1|transcriptional coactivator tubedown-100|tubedown-1	NM_057175.4	NP_476516.1	NC_000004.12	protein-coding	REVIEWED	4	+	139301466	139390780	Reference GRCh38.p12 Primary Assembly
hsa-mir-497_25g	NM_001352262.1	1	559.8	559.8	0.0225	0.049	1	1	6.54e-06	7	1	0	20	312	16	0	134.8	0	0	21	1765	2	21	911	930	20	20	0	read	NM_001352262.1	9606	80199	FUZ	CPLANE3|FY|NTD	fuzzy planar cell polarity protein	protein fuzzy homolog|ciliogenesis and planar polarity effector 3|fuzzy homolog	NM_001352262.1	NP_001339191.1	NC_000019.10	protein-coding	REVIEWED	19	-	49806865	49817375	Reference GRCh38.p12 Primary Assembly
hsa-mir-497_25g	NM_001317991.1	1	521.5	521.5	0.00844	0.0168	1	1	6.54e-06	8	1	1	20	240	40	0	158.5	0	0	21	3059	2	20	1131	1150	19	20	0	read	NM_001317991.1	9606	80256	FAM214B	KIAA1539	family with sequence similarity 214 member B	protein FAM214B	NM_001317991.1	NP_001304920.1	NC_000009.12	protein-coding	VALIDATED	9	-	35104120	35116340	Reference GRCh38.p12 Primary Assembly
hsa-mir-497_25g	NM_001319960.1	2	1171.9	663.3	0.0185	0.0308	3	3	2.18e-14	9.5	1	0	17	240	8	0	252.3	0	0	21	6718	4	20	3560	3576	17	17	0	read	NM_001319960.1	9606	80267	EDEM3	C1orf22	ER degradation enhancing alpha-mannosidase like protein 3	ER degradation-enhancing alpha-mannosidase-like protein 3|ER degradation enhancer, mannosidase alpha-like 3|ER degradation-enhancing -mannosidase-like protein 3|ER degradation-enhancing alpha-mannosidase-like 3|alpha-1,2-mannosidase EDEM3	NM_001319960.1	NP_001306889.1	NC_000001.11	protein-coding	VALIDATED	1	-	184690490	184754906	Reference GRCh38.p12 Primary Assembly
hsa-mir-497_25g	NM_025230.4	1	529.1	529.1	0.00776	0.0308	1	1	6.54e-06	13	1	0	8	312	0	0	133.1	0	0	21	4311	14	21	305	312	8	8	0	read	NM_025230.4	9606	80344	DCAF11	GL014|PRO2389|WDR23	DDB1 and CUL4 associated factor 11	DDB1- and CUL4-associated factor 11|WD repeat domain 23|WD repeat-containing protein 23	NM_025230.4	NP_079506.3	NC_000014.9	protein-coding	REVIEWED	14	+	24114696	24125241	Reference GRCh38.p12 Primary Assembly
hsa-mir-497_25g	NM_001024736.1	2	1136.9	616	0.00561	0.0312	3	3	2.18e-14	12	1	0	12	240	0	0	217	0	0	21	3419	9	20	2024	2035	12	12	0	read	NM_001024736.1	9606	80381	CD276	4Ig-B7-H3|B7-H3|B7H3|B7RP-2	CD276 molecule	CD276 antigen|B7 homolog 3|costimulatory molecule	NM_001024736.1	NP_001019907.1	NC_000015.10	protein-coding	REVIEWED	15	+	73683965	73714517	Reference GRCh38.p12 Primary Assembly
hsa-mir-497_25g	NM_030891.5	1	517.7	517.7	0.0139	0.0229	1	1	6.54e-06	13	1	0	9	240	0	0	198.7	0	0	21	5900	12	20	2274	2282	9	9	0	read	NM_030891.5	9606	81543	LRRC3	C21orf102|C21orf30|LRRC3DN	leucine rich repeat containing 3	leucine-rich repeat-containing protein 3|LRRC3 downstream neighbor (non-protein coding)|intronless long ORF, AL117578	NM_030891.5	NP_112153.1	NC_000021.9	protein-coding	VALIDATED	21	+	44455485	44462195	Reference GRCh38.p12 Primary Assembly
hsa-mir-497_25g	NM_031288.3	1	628.3	628.3	0.00213	0.00958	3	3	2.18e-14	10	1	0	16	312	0	0	150.3	0	0	21	1266	6	21	667	682	16	16	0	read	NM_031288.3	9606	83444	INO80B	HMGA1L4|HMGIYL4|IES2|PAP-1BP|PAPA-1|PAPA1|ZNHIT4|hIes2	INO80 complex subunit B	INO80 complex subunit B|IES2 homolog|PAP (Pim-1 associated protein) associated protein 1|PAP-1 binding protein|PAP-1-associated protein 1|high mobility group AT-hook 1-like 4|zinc finger HIT domain-containing protein 4|zinc finger, HIT type 4	NM_031288.3	NP_112578.2	NC_000002.12	protein-coding	REVIEWED	2	+	74455022	74457959	Reference GRCh38.p12 Primary Assembly
hsa-mir-497_25g	NM_031439.3	2	336.3	306.9	0.0837	0.0955	3	3	2.18e-14	6.5	1	0	18	84	-4	0	42.9	0	0	21	3278	1	18	2872	2889	18	18	11	read	NM_031439.3	9606	83595	SOX7	-	SRY-box 7	transcription factor SOX-7|SRY (sex determining region Y)-box 7	NM_031439.3	NP_113627.1	NC_000008.11	protein-coding	REVIEWED	8	-	10723767	10730573	Reference GRCh38.p12 Primary Assembly
hsa-mir-497_25g	NM_032144.2	1	823.3	823.3	3.58e-06	0.000173	8	8	0	6.5	1	1	20	240	12	0	208.3	0	0	21	3077	1	20	1185	1203	20	19	0	read	NM_032144.2	9606	84084	RAB6C	WTH3	RAB6C, member RAS oncogene family	ras-related protein Rab-6C|rab6-like protein WTH3	NM_032144.2	NP_115520.2	NC_000002.12	protein-coding	VALIDATED	2	+	129979661	129982737	Reference GRCh38.p12 Primary Assembly
hsa-mir-497_25g	NM_001289111.1	1	703.7	703.7	0.00293	0.018	5	5	0	11	1	0	13	240	0	0	217.7	0	0	21	3666	8	20	2785	2797	13	13	0	read	NM_001289111.1	9606	84154	RPF2	BXDC1|bA397G5.4	ribosome production factor 2 homolog	ribosome production factor 2 homolog|brix domain containing 1|brix domain-containing protein 1|homolog of Rpf2|ribosomal processing factor 2 homolog|ribosome biogenesis protein RPF2 homolog	NM_001289111.1	NP_001276040.1	NC_000006.12	protein-coding	VALIDATED	6	+	110982016	111028262	Reference GRCh38.p12 Primary Assembly
hsa-mir-497_25g	NM_005054.2	2	840.5	558.6	0.00181	0.0108	2	2	3.54e-10	11	1	0	15	240	0	0	197.6	0	0	21	7182	6	20	5635	5649	15	15	0	read	NM_005054.2	9606	84220	RGPD5	BS-63|BS63|HEL161|RGP5	RANBP2-like and GRIP domain containing 5	RANBP2-like and GRIP domain-containing protein 5/6|RANBP2-like and GRIP domain-containing protein 5|epididymis luminal protein 161|ran-binding protein 2-like 1|ran-binding protein 2-like 1/2|ranBP2-like 1|ranBP2-like 1/2|ranBP2L1|sperm membrane protein BS-63	NM_005054.2	NP_005045.2	NC_000002.12	protein-coding	REVIEWED	2	+	109760593	109857690	Reference GRCh38.p12 Primary Assembly
hsa-mir-497_25g	NM_001031727.3	1	745.6	745.6	0.0103	0.0292	3	3	2.18e-14	8	1	0	17	312	20	0	239.6	0	0	21	3202	5	21	2942	2958	17	17	0	read	NM_001031727.3	9606	84245	MRI1	M1Pi|MRDI|MTNA|Ypr118w	methylthioribose-1-phosphate isomerase 1	methylthioribose-1-phosphate isomerase|MTR-1-P isomerase|S-methyl-5-thioribose-1-phosphate isomerase 1|mediator of RhoA-dependent invasion|methylthioribose-1-phosphate isomerase homolog|translation initiation factor eIF-2B subunit alpha/beta/delta-like protein	NM_001031727.3	NP_001026897.1	NC_000019.10	protein-coding	REVIEWED	19	+	13764491	13774281	Reference GRCh38.p12 Primary Assembly
hsa-mir-497_25g	NM_001303542.2	1	674	674	0.00254	0.0209	4	4	0	9	1	0	18	240	8	0	224	0	0	21	8355	3	20	1662	1679	18	18	0	read	NM_001303542.2	9606	84440	RAB11FIP4	FIP4-Rab11|RAB11-FIP4	RAB11 family interacting protein 4	rab11 family-interacting protein 4|RAB11 family interacting protein 4 (class II)|arfophilin-2	NM_001303542.2	NP_001290471.2	NC_000017.11	protein-coding	REVIEWED	17	+	31391623	31538216	Reference GRCh38.p12 Primary Assembly
hsa-mir-497_25g	NM_032673.2	1	653.3	653.3	1.07e-05	0.000343	3	3	2.18e-14	7.5	1	0	18	240	12	0	225.3	0	0	21	939	3	20	154	171	18	18	0	read	NM_032673.2	9606	84759	PCGF1	2010002K04Rik|NSPC1|RNF3A-2|RNF68	polycomb group ring finger 1	polycomb group RING finger protein 1|RING finger protein 68|nervous system Polycomb-1	NM_032673.2	NP_116062.2	NC_000002.12	protein-coding	VALIDATED	2	-	74505042	74507693	Reference GRCh38.p12 Primary Assembly
hsa-mir-497_25g	NM_001303114.1	2	2451.8	1611.5	7.99e-13	1.54e-10	28	28	0	8	1	0	18	240	12	0	185.5	0	0	21	1707	3	20	1170	1187	18	18	0	read	NM_001303114.1	9606	84790	TUBA1C	TUBA6|bcm948	tubulin alpha 1c	tubulin alpha-1C chain|alpha-tubulin 6|tubulin alpha-6 chain|tubulin, alpha 6	NM_001303114.1	NP_001290043.1	NC_000012.12	protein-coding	VALIDATED	12	+	49227925	49273337	Reference GRCh38.p12 Primary Assembly
hsa-mir-497_25g	NM_032818.2	1	1549.8	1549.8	0	0	26	28	0	11	1	0	12	240	0	0	223.8	0	0	21	3763	9	20	425	436	12	12	0	read	NM_032818.2	9606	84904	ARHGEF39	C9orf100	Rho guanine nucleotide exchange factor 39	rho guanine nucleotide exchange factor 39|Rho guanine nucleotide exchange factor (GEF) 39|vav-like protein C9orf100	NM_032818.2	NP_116207.2	NC_000009.12	protein-coding	VALIDATED	9	-	35658874	35665280	Reference GRCh38.p12 Primary Assembly
hsa-mir-497_25g	NM_033215.4	1	535.6	535.6	0.00705	0.0307	1	1	6.54e-06	8	1	1	17	252	60	0	135.6	0	0	21	3448	6	21	377	393	16	17	0	read	NM_033215.4	9606	89801	PPP1R3F	HB2E|LL0XNC01-7P3.1|R3F	protein phosphatase 1 regulatory subunit 3F	protein phosphatase 1 regulatory subunit 3F|protein phosphatase 1, regulatory (inhibitor) subunit 3F	NM_033215.4	NP_149992.3	NC_000023.11	protein-coding	REVIEWED	X	+	49269821	49301464	Reference GRCh38.p12 Primary Assembly
hsa-mir-497_25g	NM_001346789.1	1	552.1	552.1	0.00683	0.0317	2	3	4.77e-07	10.5	1	0	15	240	0	0	186.1	0	0	21	4096	6	20	1161	1175	15	15	0	read	NM_001346789.1	9606	90121	TSR2	DBA14|DT1P1A10|WGG1	TSR2, ribosome maturation factor	pre-rRNA-processing protein TSR2 homolog|TSR2, 20S rRNA accumulation, homolog|WGG motif containing 1	NM_001346789.1	NP_001333718.1	NC_000023.11	protein-coding	REVIEWED	X	+	54440374	54448031	Reference GRCh38.p12 Primary Assembly
hsa-mir-497_25g	NM_001168299.1	1	587.6	587.6	0.00408	0.0126	1	1	6.54e-06	6	1	1	20	240	36	0	221.6	0	0	21	3223	1	20	1840	1858	20	19	0	read	NM_001168299.1	9606	90293	KLHL13	BKLHD2	kelch like family member 13	kelch-like protein 13|BTB and kelch domain containing 2|kelch-like 13	NM_001168299.1	NP_001161771.1	NC_000023.11	protein-coding	REVIEWED	X	-	117897812	118117339	Reference GRCh38.p12 Primary Assembly
hsa-mir-497_25g	NM_001300753.1	1	2601.5	2601.5	0	0	53	56	0	7.5	1	0	19	240	8	0	180.5	0	0	21	4642	2	20	1011	1029	19	19	0	read	NM_001300753.1	9606	90806	ANGEL2	Ccr4d|KIAA0759L	angel homolog 2	protein angel homolog 2	NM_001300753.1	NP_001287682.1	NC_000001.11	protein-coding	VALIDATED	1	-	212992181	213015874	Reference GRCh38.p12 Primary Assembly
hsa-mir-497_25g	NM_001303249.2	1	545.7	545.7	0.000917	0.00917	1	1	6.54e-06	12	1	0	11	240	0	0	225.7	0	0	21	4554	10	20	864	874	11	11	0	read	NM_001303249.2	9606	91137	SLC25A46	HMSN6B	solute carrier family 25 member 46	solute carrier family 25 member 46	NM_001303249.2	NP_001290178.1	NC_000005.10	protein-coding	REVIEWED	5	+	110738135	110765173	Reference GRCh38.p12 Primary Assembly
hsa-mir-497_25g	NM_001017919.1	1	530.4	530.4	0.00569	0.015	1	1	6.54e-06	11	1	0	13	240	0	0	209.4	0	0	21	2690	8	20	1502	1514	13	13	0	read	NM_001017919.1	9606	91433	RCCD1	-	RCC1 domain containing 1	RCC1 domain-containing protein 1	NM_001017919.1	NP_001017919.1	NC_000015.10	protein-coding	VALIDATED	15	+	90954863	90964857	Reference GRCh38.p12 Primary Assembly
hsa-mir-497_25g	NM_001329976.1	1	686.3	686.3	0.000757	0.0121	5	5	0	10.5	1	0	13	240	0	0	198.3	0	0	21	3530	8	20	2368	2380	13	13	0	read	NM_001329976.1	9606	91694	LONRF1	RNF191	LON peptidase N-terminal domain and ring finger 1	LON peptidase N-terminal domain and RING finger protein 1|RING finger protein 191	NM_001329976.1	NP_001316905.1	NC_000008.11	protein-coding	VALIDATED	8	-	12721893	12755485	Reference GRCh38.p12 Primary Assembly
hsa-mir-497_25g	NM_001043318.2	2	1006.4	529.3	0.0107	0.0269	1	5	0.0619	12	1	0	10	240	0	0	204.3	0	0	21	7721	11	20	7466	7475	10	10	0	read	NM_001043318.2	9606	91748	ELMSAN1	C14orf117|C14orf43|LSR68|MIDEAS|c14_5541	ELM2 and Myb/SANT domain containing 1	ELM2 and SANT domain-containing protein 1|ELM2 and Myb/SANT-like domain containing 1	NM_001043318.2	NP_001036783.1	NC_000014.9	protein-coding	VALIDATED	14	-	73715121	73790284	Reference GRCh38.p12 Primary Assembly
hsa-mir-497_25g	NM_001134456.1	2	1055.8	566.3	0.0121	0.0281	1	1	6.54e-06	6.5	1	0	20	252	16	0	192.3	0	0	21	8929	2	21	420	439	20	20	0	read	NM_001134456.1	9606	91775	NXPE3	FAM55C|MST115|MSTP115	neurexophilin and PC-esterase domain family member 3	NXPE family member 3|family with sequence similarity 55, member C	NM_001134456.1	NP_001127928.1	NC_000003.12	protein-coding	REVIEWED	3	+	101779176	101828230	Reference GRCh38.p12 Primary Assembly
hsa-mir-497_25g	NM_001310338.1	1	754.8	754.8	0.00194	0.0188	5	5	0	8.5	1	1	14	240	0	0	270.8	0	0	21	2417	7	20	2312	2324	14	13	0	read	NM_001310338.1	9606	92667	MGME1	C20orf72|DDK1|MTDPS11|bA504H3.4	mitochondrial genome maintenance exonuclease 1	mitochondrial genome maintenance exonuclease 1	NM_001310338.1	NP_001297267.1	NC_000020.11	protein-coding	REVIEWED	20	+	17968593	17991121	Reference GRCh38.p12 Primary Assembly
hsa-mir-497_25g	NM_001099337.1	1	571.5	571.5	0.00938	0.0211	1	1	6.54e-06	7.5	1	0	19	240	16	0	222.5	0	0	21	1430	2	20	659	677	19	19	0	read	NM_001099337.1	9606	93058	COQ10A	-	coenzyme Q10A	coenzyme Q-binding protein COQ10 homolog A, mitochondrial|coenzyme Q10 homolog A	NM_001099337.1	NP_001092807.1	NC_000012.12	protein-coding	VALIDATED	12	+	56266857	56270965	Reference GRCh38.p12 Primary Assembly
hsa-mir-497_25g	NM_032796.3	1	765.9	765.9	0.000119	0.00437	7	7	0	13	1	0	9	240	0	0	206.9	0	0	21	3533	12	20	337	345	9	9	0	read	NM_032796.3	9606	94056	SYAP1	BSTA|PRO3113	synapse associated protein 1	synapse-associated protein 1|BSD domain-containing signal transducer and Akt interactor protein|SAP47 homolog|synapse associated protein 1, SAP47 homolog	NM_032796.3	NP_116185.2	NC_000023.11	protein-coding	VALIDATED	X	+	16719583	16762683	Reference GRCh38.p12 Primary Assembly
hsa-mir-497_25g	NM_001001653.2	2	1028.5	538.9	0.115	0.137	1	1	6.54e-06	9.5	1	0	15	248	0	0	198.9	0	0	21	2032	6	20	1325	1339	15	15	0	read	NM_001001653.2	9606	112950	MED8	ARC32	mediator complex subunit 8	mediator of RNA polymerase II transcription subunit 8|activator-recruited cofactor 32 kDa component|mediator of RNA polymerase II transcription subunit MED8	NM_001001653.2	NP_001001653.1	NC_000001.11	protein-coding	REVIEWED	1	-	43383907	43389811	Reference GRCh38.p12 Primary Assembly
hsa-mir-497_25g	NM_001297758.1	2	1179	658.2	0.00321	0.0239	4	4	0	7	1	0	20	248	8	0	182.2	0	0	21	2469	1	20	1890	1909	20	20	0	read	NM_001297758.1	9606	113510	HELQ	HEL308	helicase, POLQ like	helicase POLQ-like|DNA helicase HEL308|POLQ-like helicase|mus308-like helicase	NM_001297758.1	NP_001284687.1	NC_000004.12	protein-coding	VALIDATED	4	-	83407342	83456045	Reference GRCh38.p12 Primary Assembly
hsa-mir-497_25g	NM_052905.3	1	566.7	566.7	0.0108	0.0346	1	1	6.54e-06	8	1	0	19	240	12	0	223.7	0	0	21	5575	2	20	1522	1540	19	19	0	read	NM_052905.3	9606	114793	FMNL2	FHOD2	formin like 2	formin-like protein 2|formin homology 2 domain containing 2|formin homology 2 domain-containing protein 2	NM_052905.3	NP_443137.2	NC_000002.12	protein-coding	REVIEWED	2	+	152335169	152649833	Reference GRCh38.p12 Primary Assembly
hsa-mir-497_25g	NM_001146032.1	1	555.4	555.4	0.112	0.131	1	1	6.54e-06	9	1	0	15	248	0	0	209.4	0	0	21	4895	6	20	1566	1580	15	15	0	read	NM_001146032.1	9606	115548	FCHO2	-	FCH domain only 2	F-BAR domain only protein 2|FCH domain only protein 2	NM_001146032.1	NP_001139504.1	NC_000005.10	protein-coding	VALIDATED	5	+	72955980	73090521	Reference GRCh38.p12 Primary Assembly
hsa-mir-497_25g	NM_173791.4	1	624.3	624.3	0.00889	0.0262	2	2	3.54e-10	9	1	0	20	240	8	0	257.3	0	0	21	6484	1	20	6409	6428	20	20	0	read	NM_173791.4	9606	118987	PDZD8	PDZK8	PDZ domain containing 8	PDZ domain-containing protein 8|sarcoma antigen NY-SAR-84/NY-SAR-104	NM_173791.4	NP_776152.1	NC_000010.11	protein-coding	VALIDATED	10	-	117280488	117375491	Reference GRCh38.p12 Primary Assembly
hsa-mir-497_25g	NM_001080435.2	1	594.4	594.4	0.0128	0.0291	3	3	2.18e-14	8.5	1	1	18	160	44	0	231.4	0	0	21	3859	4	20	2320	2337	17	18	0	read	NM_001080435.2	9606	123720	WHAMM	WHAMM1|WHDC1	WAS protein homolog associated with actin, golgi membranes and microtubules	WASP homolog-associated protein with actin, membranes and microtubules|WAS protein homology region 2 domain-containing protein 1|WH2 domain-containing protein 1	NM_001080435.2	NP_001073904.1	NC_000015.10	protein-coding	REVIEWED	15	+	82809627	82834860	Reference GRCh38.p12 Primary Assembly
hsa-mir-497_25g	NM_001323906.1	1	734.9	734.9	0.00188	0.015	4	4	0	7.5	1	1	19	240	8	0	285.9	0	0	21	2946	2	20	2214	2231	19	18	0	read	NM_001323906.1	9606	126626	GABPB2	GABPB-2	GA binding protein transcription factor subunit beta 2	GA-binding protein subunit beta-2|GA binding protein transcription factor beta subunit 2|GABP subunit beta-2	NM_001323906.1	NP_001310835.1	NC_000001.11	protein-coding	VALIDATED	1	+	151070179	151125544	Reference GRCh38.p12 Primary Assembly
hsa-mir-497_25g	NM_001080472.3	1	521	521	0.0653	0.0828	1	1	6.54e-06	13	1	0	9	240	0	0	202	0	0	21	4680	12	20	1252	1260	9	9	0	read	NM_001080472.3	9606	128486	FITM2	C20orf142|Fit2|dJ881L22.2	fat storage inducing transmembrane protein 2	fat storage-inducing transmembrane protein 2|fat-inducing protein 2|fat-inducing transcript 2	NM_001080472.3	NP_001073941.1	NC_000020.11	protein-coding	VALIDATED	20	-	44302837	44311251	Reference GRCh38.p12 Primary Assembly
hsa-mir-497_25g	NM_172069.3	2	1034.7	548.9	0.00703	0.0227	1	1	6.54e-06	9	1	0	20	240	0	0	228.9	0	0	21	6972	1	20	6219	6238	20	20	0	read	NM_172069.3	9606	130271	PLEKHH2	PLEKHH1L	pleckstrin homology, MyTH4 and FERM domain containing H2	pleckstrin homology domain-containing family H member 2|pleckstrin homology domain containing, family H (with MyTH4 domain) member 2	NM_172069.3	NP_742066.2	NC_000002.12	protein-coding	VALIDATED	2	+	43637299	43767986	Reference GRCh38.p12 Primary Assembly
hsa-mir-497_25g	NM_152412.2	1	596.4	596.4	0.00356	0.0121	2	2	3.54e-10	12	1	0	9	248	0	0	220.4	0	0	21	3276	12	20	2593	2601	9	9	0	read	NM_152412.2	9606	137209	ZNF572	-	zinc finger protein 572	zinc finger protein 572	NM_152412.2	NP_689625.2	NC_000008.11	protein-coding	VALIDATED	8	+	124973296	124979388	Reference GRCh38.p12 Primary Assembly
hsa-mir-497_25g	NM_145269.4	1	640.6	640.6	0.0161	0.0484	4	4	0	10	1	0	18	240	4	0	197.6	0	0	21	1984	3	20	739	756	18	18	0	read	NM_145269.4	9606	137392	FAM92A	FAM92A1	family with sequence similarity 92 member A	protein FAM92A|family with sequence similarity 92 member A1|protein FAM92A1	NM_145269.4	NP_660312.2	NC_000008.11	protein-coding	VALIDATED	8	+	93700251	93732369	Reference GRCh38.p12 Primary Assembly
hsa-mir-497_25g	NM_198450.5	1	634.4	634.4	0.000579	0.0036	2	2	3.54e-10	9	1	0	17	240	20	0	249.4	0	0	21	6479	4	20	5180	5196	17	17	0	read	NM_198450.5	9606	139322	APOOL	CXorf33|FAM121A|Mic27|UNQ8193	apolipoprotein O like	MICOS complex subunit MIC27|AAIR8193|family with sequence similarity 121A	NM_198450.5	NP_940852.3	NC_000023.11	protein-coding	REVIEWED	X	+	85003851	85093316	Reference GRCh38.p12 Primary Assembly
hsa-mir-497_25g	NM_001012968.2	1	528.3	528.3	0.002	0.00745	1	1	6.54e-06	6.5	1	0	19	252	16	0	153.3	0	0	21	4112	3	21	633	651	19	19	0	read	NM_001012968.2	9606	139886	SPIN4	TDRD28	spindlin family member 4	spindlin-4	NM_001012968.2	NP_001012986.2	NC_000023.11	protein-coding	VALIDATED	X	-	63347227	63351338	Reference GRCh38.p12 Primary Assembly
hsa-mir-497_25g	NM_001278305.1	2	1025.2	539.4	0.00931	0.0253	1	1	6.54e-06	9	1	0	20	240	8	0	209.4	0	0	21	2135	1	20	1543	1562	20	20	0	read	NM_001278305.1	9606	140739	UBE2F	NCE2	ubiquitin conjugating enzyme E2 F (putative)	NEDD8-conjugating enzyme UBE2F|NEDD8 carrier protein UBE2F|NEDD8 protein ligase UBE2F|NEDD8-conjugating enzyme 2|RING-type E3 NEDD8 transferase UBE2F|ubiquitin-conjugating enzyme E2F (putative)	NM_001278305.1	NP_001265234.1	NC_000002.12	protein-coding	VALIDATED	2	+	237966944	238042781	Reference GRCh38.p12 Primary Assembly
hsa-mir-497_25g	NM_001329630.1	1	985.7	985.7	0.000745	0.00564	11	11	0	5.5	1	1	20	240	24	0	232.7	0	0	21	5563	1	20	5355	5373	20	19	0	read	NM_001329630.1	9606	144100	PLEKHA7	-	pleckstrin homology domain containing A7	pleckstrin homology domain-containing family A member 7|PH domain-containing family A member 7|pleckstrin homology domain containing, family A member 2|pleckstrin homology domain containing, family A member 7|pleckstrin homology domain-containing family A member 6	NM_001329630.1	NP_001316559.1	NC_000011.10	protein-coding	VALIDATED	11	-	16777296	17014422	Reference GRCh38.p12 Primary Assembly
hsa-mir-497_25g	NM_194285.2	1	549.7	549.7	0.00131	0.00588	1	1	6.54e-06	13	1	0	9	240	0	0	230.7	0	0	21	5752	12	20	4083	4091	9	9	0	read	NM_194285.2	9606	144108	SPTY2D1	Spt2	SPT2 chromatin protein domain containing 1	protein SPT2 homolog|SPT2 domain-containing protein 1|SPT2, Suppressor of Ty, domain containing 1	NM_194285.2	NP_919261.2	NC_000011.10	protein-coding	VALIDATED	11	-	18606400	18634822	Reference GRCh38.p12 Primary Assembly
hsa-mir-497_25g	NM_153347.2	2	1164	673.4	0.000698	0.00684	4	4	0	9.5	1	0	15	240	0	0	222.4	0	0	21	3676	6	20	1933	1947	15	15	0	read	NM_153347.2	9606	144110	TMEM86A	-	transmembrane protein 86A	lysoplasmalogenase-like protein TMEM86A	NM_153347.2	NP_699178.1	NC_000011.10	protein-coding	VALIDATED	11	+	18698734	18704784	Reference GRCh38.p12 Primary Assembly
hsa-mir-497_25g	NM_001144881.1	2	690.2	615.5	0.0207	0.0543	3	3	2.18e-14	6	1	1	20	240	28	0	182.5	0	0	21	4254	1	20	924	942	20	19	0	read	NM_001144881.1	9606	144165	PRICKLE1	EPM1B|RILP	prickle planar cell polarity protein 1	prickle-like protein 1|REST (RE-1 silencing transcription factor)/NRSF (neuron-restrictive silencer factor)-interacting LIM domain protein|REST/NRSF interacting LIM domain protein|REST/NRSF-interacting LIM domain protein 1|prickle homolog 1|prickle-like 1	NM_001144881.1	NP_001138353.1	NC_000012.12	protein-coding	REVIEWED	12	-	42458337	42589769	Reference GRCh38.p12 Primary Assembly
hsa-mir-497_25g	NM_001300940.1	1	762.3	762.3	0.00726	0.0176	5	6	0	8	1	0	19	240	12	0	261.3	0	0	21	2733	2	20	974	992	19	19	0	read	NM_001300940.1	9606	144577	C12orf66	-	chromosome 12 open reading frame 66	KICSTOR complex protein C12orf66|UPF0536 protein C12orf66	NM_001300940.1	NP_001287869.1	NC_000012.12	protein-coding	VALIDATED	12	-	64186311	64222295	Reference GRCh38.p12 Primary Assembly
hsa-mir-497_25g	NM_001128303.2	1	659.4	659.4	0.00122	0.0179	4	4	0	8.5	1	0	19	240	16	0	197.4	0	0	21	4394	2	20	684	702	19	19	0	read	NM_001128303.2	9606	144811	LACC1	C13orf31|FAMIN	laccase domain containing 1	laccase domain-containing protein 1|fatty acid metabolism-immunity nexus|fatty acid metabolisma"immunity nexus|laccase (multicopper oxidoreductase) domain containing 1	NM_001128303.2	NP_001121775.1	NC_000013.11	protein-coding	REVIEWED	13	+	43879177	43893931	Reference GRCh38.p12 Primary Assembly
hsa-mir-497_25g	NM_001144884.1	1	3380.8	3380.8	0	0	71	80	0	7.5	1	0	19	240	16	0	230.8	0	0	21	7918	2	20	4769	4787	19	19	0	read	NM_001144884.1	9606	148867	SLC30A7	ZNT7|ZnT-7|ZnTL2	solute carrier family 30 member 7	zinc transporter 7|solute carrier family 30 (zinc transporter), member 7|zinc transporter ZnT-7|zinc transporter like 2|znt-like transporter 2	NM_001144884.1	NP_001138356.1	NC_000001.11	protein-coding	VALIDATED	1	+	100896075	100996912	Reference GRCh38.p12 Primary Assembly
hsa-mir-497_25g	NM_173354.4	1	1061.8	1061.8	1.37e-06	0.0001	13	13	0	11	1	0	12	240	0	0	255.8	0	0	21	4716	9	20	1134	1145	12	12	0	read	NM_173354.4	9606	150094	SIK1	MSK|SIK|SIK-1|SNF1LK	salt inducible kinase 1	serine/threonine-protein kinase SIK1|SNF1-like kinase|myocardial SNF1-like kinase|salt-inducible protein kinase 1|serine/threonine-protein kinase SNF1-like kinase 1|serine/threonine-protein kinase SNF1LK	NM_173354.4	NP_775490.2	NC_000021.9	protein-coding	REVIEWED	21	-	43414489	43427131	Reference GRCh38.p12 Primary Assembly
hsa-mir-497_25g	NM_001077637.1	2	1458.5	826.9	6.45e-06	0.00016	8	8	0	6.5	1	1	20	240	12	0	211.9	0	0	21	3672	1	20	1169	1187	20	19	0	read	NM_001077637.1	9606	150786	RAB6D	RAB6CL|WTH3DI	RAB6D, member RAS oncogene family	ras-related protein Rab-6D|RAB6C-like|rab6-like protein WTH3DI	NM_001077637.1	NP_001071105.1	NC_000002.12	protein-coding	VALIDATED	2	-	131360491	131364157	Reference GRCh38.p12 Primary Assembly
hsa-mir-497_25g	NM_001012409.3	1	2725.1	2725.1	0	0	54	54	0	13	1	0	9	240	0	0	286.1	0	0	21	3004	12	20	2019	2027	9	9	0	read	NM_001012409.3	9606	151648	SGO1	CAID|NY-BR-85|SGO|SGOL1	shugoshin 1	shugoshin 1|serologically defined breast cancer antigen NY-BR-85|shugoshin 1AB protein|shugoshin 1CD protein|shugoshin 1EF protein|shugoshin 1GH protein|shugoshin 1KL protein	NM_001012409.3	NP_001012409.1	NC_000003.12	protein-coding	REVIEWED	3	-	20160592	20188142	Reference GRCh38.p12 Primary Assembly
hsa-mir-497_25g	NM_001113490.1	1	576.9	576.9	0.00613	0.0158	1	1	6.54e-06	7.5	1	1	17	312	24	0	152.9	0	0	21	6945	5	21	2860	2875	17	16	0	read	NM_001113490.1	9606	154796	AMOT	-	angiomotin	angiomotin|angiomotin p130 isoform|angiomotin p80 isoform	NM_001113490.1	NP_001106962.1	NC_000023.11	protein-coding	REVIEWED	X	-	112774876	112840945	Reference GRCh38.p12 Primary Assembly
hsa-mir-497_25g	NM_001287036.1	1	1961.1	1961.1	0	0	35	35	0	9	1	0	20	240	12	0	270.1	0	0	21	7659	1	20	3975	3994	20	20	0	read	NM_001287036.1	9606	158405	KIAA1958	-	KIAA1958	uncharacterized protein KIAA1958	NM_001287036.1	NP_001273965.1	NC_000009.12	protein-coding	VALIDATED	9	+	112486967	112665310	Reference GRCh38.p12 Primary Assembly
hsa-mir-497_25g	NM_001330181.1	1	685.5	685.5	3.05e-05	0.00071	4	4	0	11	1	0	15	240	0	0	245.5	0	0	21	4664	6	20	2026	2040	15	15	0	read	NM_001330181.1	9606	162494	RHBDL3	RHBDL4|VRHO	rhomboid like 3	rhomboid-related protein 3|rhomboid, veinlet-like 3|rhomboid, veinlet-like 4|ventrhoid transmembrane protein	NM_001330181.1	NP_001317110.1	NC_000017.11	protein-coding	VALIDATED	17	+	32266166	32324660	Reference GRCh38.p12 Primary Assembly
hsa-mir-497_25g	NM_001199260.1	1	596.4	596.4	0.00387	0.0299	1	1	6.54e-06	8.5	1	0	20	240	8	0	262.4	0	0	21	8331	1	20	1959	1978	20	20	0	read	NM_001199260.1	9606	163590	TOR1AIP2	IFRG15|LULL1|NET9	torsin 1A interacting protein 2	torsin-1A-interacting protein 2|interferon alpha responsive protein|15 kDa interferon-responsive protein|interferon responsive gene 15|lumenal domain like LAP1|torsin A interacting protein 2	NM_001199260.1	NP_001186189.1	NC_000001.11	protein-coding	REVIEWED	1	-	179839966	179877805	Reference GRCh38.p12 Primary Assembly
hsa-mir-497_25g	NM_001284194.1	1	729	729	0.000425	0.00644	5	5	0	7.5	1	0	20	240	8	0	229	0	0	21	2191	1	20	1166	1185	20	20	0	read	NM_001284194.1	9606	170384	FUT11	-	fucosyltransferase 11	alpha-(1,3)-fucosyltransferase 11|alpha (1,3) fucosyltransferase|fuc-TXI|fucT-XI|fucosyltransferase XI|galactoside 3-L-fucosyltransferase 11	NM_001284194.1	NP_001271123.1	NC_000010.11	protein-coding	VALIDATED	10	+	73772290	73779103	Reference GRCh38.p12 Primary Assembly
hsa-mir-497_25g	NM_174916.2	2	741.1	525.3	0.000397	0.00312	1	1	6.54e-06	13	1	0	9	240	0	0	206.3	0	0	21	7758	12	20	4982	4990	9	9	0	read	NM_174916.2	9606	197131	UBR1	JBS	ubiquitin protein ligase E3 component n-recognin 1	E3 ubiquitin-protein ligase UBR1|E3a ligase|N-recognin-1|RING-type E3 ubiquitin transferase UBR1|ubiquitin ligase E3 alpha-I|ubiquitin-protein ligase E3-alpha|ubiquitin-protein ligase E3-alpha-1|ubiquitin-protein ligase E3-alpha-I	NM_174916.2	NP_777576.1	NC_000015.10	protein-coding	REVIEWED	15	-	42942896	43106087	Reference GRCh38.p12 Primary Assembly
hsa-mir-497_25g	NM_015040.3	1	604.3	604.3	0.0231	0.0561	1	1	6.54e-06	5.5	1	1	18	240	20	0	251.3	0	0	21	9901	3	20	8717	8733	18	17	0	read	NM_015040.3	9606	200576	PIKFYVE	CFD|FAB1|HEL37|PIP5K|PIP5K3|ZFYVE29	phosphoinositide kinase, FYVE-type zinc finger containing	1-phosphatidylinositol 3-phosphate 5-kinase|PIPkin-III|epididymis luminal protein 37|phosphatidylinositol 3-phosphate 5-kinase type III|phosphatidylinositol-3-phosphate/phosphatidylinositol 5-kinase, type III|phosphoinositide kinase, FYVE finger containing|type III PIP kinase|zinc finger, FYVE domain containing 29	NM_015040.3	NP_055855.2	NC_000002.12	protein-coding	REVIEWED	2	+	208266177	208358750	Reference GRCh38.p12 Primary Assembly
hsa-mir-497_25g	NM_001105573.1	1	907.1	907.1	3.62e-05	0.00144	9	9	0	9	1	0	16	240	0	0	256.1	0	0	21	5743	5	20	3504	3519	16	16	0	read	NM_001105573.1	9606	200933	FBXO45	Fbx45	F-box protein 45	F-box/SPRY domain-containing protein 1|F-box only protein 45|hFbxo45	NM_001105573.1	NP_001099043.1	NC_000003.12	protein-coding	VALIDATED	3	+	196568853	196589058	Reference GRCh38.p12 Primary Assembly
hsa-mir-497_25g	NM_001100389.1	1	603.7	603.7	0.00166	0.0104	1	1	6.54e-06	9.5	1	0	16	240	0	0	274.7	0	0	21	4511	5	20	2232	2247	16	16	0	read	NM_001100389.1	9606	201931	TMEM192	-	transmembrane protein 192	transmembrane protein 192	NM_001100389.1	NP_001093859.1	NC_000004.12	protein-coding	VALIDATED	4	-	165076077	165112912	Reference GRCh38.p12 Primary Assembly
hsa-mir-497_25g	NR_027712.1	2	1129.6	597.1	0.000558	0.00198	2	2	3.54e-10	10.5	1	0	16	240	0	0	236.1	0	0	21	4243	5	20	3474	3489	16	16	0	read	NR_027712.1	9606	206426	PIP5K1P1	-	phosphatidylinositol-4-phosphate 5-kinase type 1 pseudogene 1	PIP5K1A pseudogene|phosphatidylinositol-4-phosphate 5-kinase, type I, pseudogene 1	NR_027712.1	-	NC_000006.12	pseudo	VALIDATED	6	+	7986101	7990343	Reference GRCh38.p12 Primary Assembly
hsa-mir-497_25g	NM_001330247.1	2	1178.7	672.5	0.000968	0.0124	5	5	0	5	1	1	20	152	24	0	240.5	0	0	21	5744	1	20	4243	4261	20	19	0	read	NM_001330247.1	9606	220988	HNRNPA3	2610510D13Rik|D10S102|FBRNP|HNRPA3	heterogeneous nuclear ribonucleoprotein A3	heterogeneous nuclear ribonucleoprotein A3	NM_001330247.1	NP_001317176.1	NC_000002.12	protein-coding	VALIDATED	2	+	177212693	177223958	Reference GRCh38.p12 Primary Assembly
hsa-mir-497_25g	NM_001282948.1	1	748.9	748.9	1.89e-05	0.000244	3	3	2.18e-14	5.5	1	1	18	312	44	0	217.9	0	0	21	8675	4	21	4422	4438	18	17	0	read	NM_001282948.1	9606	221037	JMJD1C	KDM3C|TRIP-8|TRIP8	jumonji domain containing 1C	probable JmjC domain-containing histone demethylation protein 2C|TR-interacting protein 8|thyroid hormone receptor interactor 8|thyroid receptor-interacting protein 8	NM_001282948.1	NP_001269877.1	NC_000010.11	protein-coding	REVIEWED	10	-	63167220	63522074	Reference GRCh38.p12 Primary Assembly
hsa-mir-497_25g	NM_001350984.1	2	539.8	565.7	0.0128	0.027	1	1	6.54e-06	7	1	1	17	240	28	0	208.7	0	0	21	4549	4	20	1853	1868	17	16	0	read	NM_001350984.1	9606	221785	ZSCAN25	ZNF498	zinc finger and SCAN domain containing 25	zinc finger and SCAN domain-containing protein 25|zinc finger protein 498	NM_001350984.1	NP_001337913.1	NC_000007.14	protein-coding	VALIDATED	7	+	99616607	99738688	Reference GRCh38.p12 Primary Assembly
hsa-mir-497_25g	NM_147128.3	1	1270.7	1270.7	0	0	19	19	0	6	1	1	20	248	16	0	199.7	0	0	21	3485	1	20	2619	2637	20	19	0	read	NM_147128.3	9606	223082	ZNRF2	RNF202	zinc and ring finger 2	E3 ubiquitin-protein ligase ZNRF2|RING finger protein 202|RING-type E3 ubiquitin transferase ZNRF2|protein Ells2|zinc and ring finger 2, E3 ubiquitin protein ligase|zinc finger/RING finger 2|zinc/RING finger protein 2	NM_147128.3	NP_667339.1	NC_000007.14	protein-coding	VALIDATED	7	+	30284306	30367691	Reference GRCh38.p12 Primary Assembly
hsa-mir-497_25g	NM_001286834.2	1	615.2	615.2	2.97e-05	0.000394	1	1	6.54e-06	6.5	1	0	21	244	20	0	257.2	0	0	21	5327	1	21	5297	5317	21	21	0	read	NM_001286834.2	9606	246243	RNASEH1	H1RNA|PEOB2|RNH1	ribonuclease H1	ribonuclease H1|ribonuclease H type II	NM_001286834.2	NP_001273763.1	NC_000002.12	protein-coding	REVIEWED	2	-	3531812	3558370	Reference GRCh38.p12 Primary Assembly
hsa-mir-497_25g	NM_001288564.1	1	708.8	708.8	0.00286	0.0187	5	5	0	6.5	1	0	20	312	16	0	121.8	0	0	21	1590	2	21	1300	1319	20	20	0	read	NM_001288564.1	9606	252839	TMEM9	DERM4|TMEM9A	transmembrane protein 9	transmembrane protein 9|dermal papilla-derived protein 4	NM_001288564.1	NP_001275493.1	NC_000001.11	protein-coding	VALIDATED	1	-	201134770	201171624	Reference GRCh38.p12 Primary Assembly
hsa-mir-497_25g	NM_153256.3	1	457.4	457.4	0.0247	0.0332	1	1	6.54e-06	10	1	0	11	248	0	0	111.4	0	0	21	3360	10	20	409	419	11	11	11	read	NM_153256.3	9606	254427	PROSER2	C10orf47	proline and serine rich 2	proline and serine-rich protein 2	NM_153256.3	NP_694988.3	NC_000010.11	protein-coding	VALIDATED	10	+	11823340	11872276	Reference GRCh38.p12 Primary Assembly
hsa-mir-497_25g	NM_173804.4	1	729.3	729.3	0.000355	0.00355	6	6	0	10.5	1	0	14	240	0	0	204.3	0	0	21	1751	7	20	1137	1150	14	14	0	read	NM_173804.4	9606	255043	TMEM86B	-	transmembrane protein 86B	lysoplasmalogenase|alkenylglycerophosphocholine hydrolase|alkenylglycerophosphoethanolamine hydrolase	NM_173804.4	NP_776165.3	NC_000019.10	protein-coding	VALIDATED	19	-	55226633	55229263	Reference GRCh38.p12 Primary Assembly
hsa-mir-497_25g	NM_153260.2	1	1334.1	1334.1	8.31e-10	9.44e-08	20	20	0	7.5	1	0	17	252	28	0	189.1	0	0	21	2427	5	21	421	437	17	17	0	read	NM_153260.2	9606	255252	LRRC57	-	leucine rich repeat containing 57	leucine-rich repeat-containing protein 57	NM_153260.2	NP_694992.2	NC_000015.10	protein-coding	VALIDATED	15	-	42528331	42548803	Reference GRCh38.p12 Primary Assembly
hsa-mir-497_25g	NR_002319.2	1	576.6	576.6	0.00103	0.00605	1	1	6.54e-06	10	1	0	15	240	0	0	249.6	0	0	21	3776	6	20	1017	1031	15	15	0	read	NR_002319.2	9606	266971	PIPSL	PIP5K1L1|PIP5K1P3|PSMD4P2|bA429H9.1	PIP5K1A and PSMD4-like, pseudogene	PIP5K1A-PSMD4|phosphatidylinositol-4-phosphate 5-kinase, type I, alpha pseudogene|phosphatidylinositol-4-phosphate 5-kinase, type I-like 1|proteasome (prosome, macropain) 26S subunit, non-ATPase, 4, pseudogene 2|proteasome 26S non-ATPase subunit 4 pseudogene|putative PIP5K1A and PSMD4-like protein	NR_002319.2	-	NC_000010.11	pseudo	VALIDATED	10	-	93958139	93961914	Reference GRCh38.p12 Primary Assembly
hsa-mir-497_25g	NM_001004060.1	1	586.1	586.1	0.000813	0.00282	1	1	6.54e-06	9.5	1	0	15	312	0	0	178.1	0	0	21	3986	7	21	3088	3102	15	15	0	read	NM_001004060.1	9606	283820	NOMO2	Nomo|PM5	NODAL modulator 2	nodal modulator 2|pM5 protein 2|pM5 protein, centromeric copy	NM_001004060.1	NP_001004060.1	NC_000016.10	protein-coding	REVIEWED	16	-	18499923	18562142	Reference GRCh38.p12 Primary Assembly
hsa-mir-497_25g	NM_001193465.1	1	1910.3	1910.3	0	0	35	35	0	9.5	1	0	19	240	4	0	227.3	0	0	21	5140	2	20	377	395	19	19	0	read	NM_001193465.1	9606	284058	KANSL1	CENP-36|KDVS|KIAA1267|MSL1v1|NSL1|hMSL1v1	KAT8 regulatory NSL complex subunit 1	KAT8 regulatory NSL complex subunit 1|MLL1/MLL complex subunit KANSL1|MSL1 homolog 1|NSL complex protein NSL1|centromere protein 36|male-specific lethal 1 homolog|non-specific lethal 1 homolog	NM_001193465.1	NP_001180394.1	NC_000017.11	protein-coding	REVIEWED	17	-	46027334	46225373	Reference GRCh38.p12 Primary Assembly
hsa-mir-497_25g	NM_001306093.1	1	545	545	0.00857	0.0253	1	1	6.54e-06	9	1	0	16	312	0	0	138	0	0	21	7566	6	21	2457	2472	16	16	0	read	NM_001306093.1	9606	284273	ZADH2	PRG-3	zinc binding alcohol dehydrogenase domain containing 2	prostaglandin reductase 3|zinc-binding alcohol dehydrogenase domain-containing protein 2	NM_001306093.1	NP_001293022.1	NC_000018.10	protein-coding	VALIDATED	18	-	75195107	75209505	Reference GRCh38.p12 Primary Assembly
hsa-mir-497_25g	NM_001010879.3	1	671.6	671.6	0.000983	0.0125	4	4	0	11	1	0	14	248	0	0	217.6	0	0	21	4460	7	20	843	856	14	14	0	read	NM_001010879.3	9606	284307	ZIK1	ZNF762	zinc finger protein interacting with K protein 1	zinc finger protein interacting with ribonucleoprotein K|zinc finger protein 762|zinc finger protein interacting with K protein 1 homolog	NM_001010879.3	NP_001010879.2	NC_000019.10	protein-coding	VALIDATED	19	+	57583641	57593889	Reference GRCh38.p12 Primary Assembly
hsa-mir-497_25g	NM_173633.2	1	698.4	698.4	2.48e-06	9.68e-05	4	4	0	8	1	0	20	240	12	0	235.4	0	0	21	1779	1	20	1095	1114	20	20	0	read	NM_173633.2	9606	284339	TMEM145	-	transmembrane protein 145	transmembrane protein 145	NM_173633.2	NP_775904.2	NC_000019.10	protein-coding	VALIDATED	19	+	42313324	42325063	Reference GRCh38.p12 Primary Assembly
hsa-mir-497_25g	NM_182588.2	1	558.6	558.6	0.0135	0.039	2	2	3.54e-10	11	1	0	15	240	0	0	197.6	0	0	21	7172	6	20	5641	5655	15	15	0	read	NM_182588.2	9606	285190	RGPD4	RGP4	RANBP2-like and GRIP domain containing 4	ranBP2-like and GRIP domain-containing protein 4	NM_182588.2	NP_872394.2	NC_000002.12	protein-coding	VALIDATED	2	+	107826920	107892543	Reference GRCh38.p12 Primary Assembly
hsa-mir-497_25g	NM_001308229.1	1	764.6	764.6	0.00121	0.0122	7	7	0	9	1	0	17	160	4	0	269.6	0	0	21	1825	4	20	1230	1246	17	17	0	read	NM_001308229.1	9606	285315	C3orf33	AC3-33	chromosome 3 open reading frame 33	protein C3orf33|AP-1 activity suppressor	NM_001308229.1	NP_001295158.1	NC_000003.12	protein-coding	VALIDATED	3	-	155762611	155806286	Reference GRCh38.p12 Primary Assembly
hsa-mir-497_25g	NM_001297732.1	1	677.6	677.6	0.00088	0.0142	2	2	3.54e-10	7	1	1	18	240	16	0	299.6	0	0	21	4533	3	20	1069	1085	18	17	0	read	NM_001297732.1	9606	285521	COX18	COX18HS	COX18, cytochrome c oxidase assembly factor	cytochrome c oxidase assembly protein COX18, mitochondrial|cytochrome c oxidase assembly homolog 18|cytochrome c oxidase assembly protein 18|mitochondrial inner membrane protein COX18	NM_001297732.1	NP_001284661.1	NC_000004.12	protein-coding	REVIEWED	4	-	73054695	73069776	Reference GRCh38.p12 Primary Assembly
hsa-mir-497_25g	NM_001270409.1	1	649.7	649.7	0.00111	0.0194	3	3	2.18e-14	9	1	0	20	240	8	0	242.7	0	0	21	3240	1	20	1092	1111	20	20	0	read	NM_001270409.1	9606	286826	LIN9	BARA|BARPsv|Lin-9|TGS|TGS1|TGS2	lin-9 DREAM MuvB core complex component	protein lin-9 homolog|TUDOR gene similar protein|beta subunit-associated regulator of apoptosis|lin-9 homolog|pRB-associated protein|rb related pathway actor|type I interferon receptor beta chain-associated protein	NM_001270409.1	NP_001257338.1	NC_000001.11	protein-coding	REVIEWED	1	-	226231148	226310081	Reference GRCh38.p12 Primary Assembly
hsa-mir-497_25g	NM_001040025.2	1	552.1	552.1	0.000798	0.0084	1	1	6.54e-06	13	1	0	9	240	0	0	233.1	0	0	21	1253	12	20	753	761	9	9	0	read	NM_001040025.2	9606	339231	ARL16	-	ADP ribosylation factor like GTPase 16	ADP-ribosylation factor-like protein 16	NM_001040025.2	NP_001035114.1	NC_000017.11	protein-coding	REVIEWED	17	-	81681164	81683923	Reference GRCh38.p12 Primary Assembly
hsa-mir-497_25g	NM_001113434.4	2	684.9	613.8	0.000869	0.00463	2	3	4.77e-07	8	1	0	20	240	24	0	219.8	0	0	21	7912	1	20	4195	4214	20	20	0	read	NM_001113434.4	9606	339263	C17orf51	-	chromosome 17 open reading frame 51	uncharacterized protein C17orf51	NM_001113434.4	NP_001106905.1	NC_000017.11	protein-coding	VALIDATED	17	-	21524605	21551677	Reference GRCh38.p12 Primary Assembly
hsa-mir-497_25g	NM_178557.3	1	586.5	586.5	0.00533	0.0152	1	1	6.54e-06	6.5	1	0	18	320	60	0	97.5	0	0	21	5894	4	21	811	828	18	18	0	read	NM_178557.3	9606	339983	NAT8L	CML3|NACED|NAT8-LIKE	N-acetyltransferase 8 like	N-acetylaspartate synthetase|N-acetyltransferase 8-like (GCN5-related, putative)|NAA synthetase|Shati|camello-like protein 3	NM_178557.3	NP_848652.2	NC_000004.12	protein-coding	REVIEWED	4	+	2059511	2069088	Reference GRCh38.p12 Primary Assembly
hsa-mir-497_25g	NM_001099289.2	1	563.9	563.9	0.0141	0.0358	1	2	0.00175	10.5	1	0	14	248	0	0	228.9	0	0	21	5614	7	20	3376	3389	14	14	0	read	NM_001099289.2	9606	344558	SH3RF3	POSH2|SH3MD4	SH3 domain containing ring finger 3	SH3 domain-containing RING finger protein 3|SH3 multiple domains 4|plenty of SH3s-2	NM_001099289.2	NP_001092759.1	NC_000002.12	protein-coding	VALIDATED	2	+	109129438	109504635	Reference GRCh38.p12 Primary Assembly
hsa-mir-497_25g	NR_028301.1	1	853.7	853.7	1.24e-10	2.03e-08	8	8	0	10.5	1	0	15	240	0	0	251.7	0	0	21	3278	6	20	451	465	15	15	0	read	NR_028301.1	9606	344595	DUBR	DUM|LINC00883|LINC0883	DPPA2 upstream binding RNA	long intergenic non-protein coding RNA 883	NR_028301.1	-	NC_000003.12	ncRNA	VALIDATED	3	+	107240691	107326963	Reference GRCh38.p12 Primary Assembly
hsa-mir-497_25g	NM_001010891.4	2	1375.7	829.7	1.36e-06	2.17e-05	6	6	0	7.5	1	0	20	240	8	0	292.7	0	0	21	7863	1	20	5143	5162	20	20	0	read	NM_001010891.4	9606	345778	MTX3	-	metaxin 3	metaxin-3	NM_001010891.4	NP_001010891.4	NC_000005.10	protein-coding	VALIDATED	5	-	79976715	79991264	Reference GRCh38.p12 Primary Assembly
hsa-mir-497_25g	NM_001282380.1	1	636.3	636.3	0.000519	0.00855	2	2	3.54e-10	8.5	1	0	20	240	4	0	271.3	0	0	21	6503	1	20	6115	6134	20	20	0	read	NM_001282380.1	9606	348110	ARPIN	C15orf38	actin related protein 2/3 complex inhibitor	arpin|UPF0552 protein C15orf38|arp2/3 inhibition protein	NM_001282380.1	NP_001269309.1	NC_000015.10	protein-coding	VALIDATED	15	-	89896531	89912989	Reference GRCh38.p12 Primary Assembly
hsa-mir-497_25g	NM_194314.2	1	588.9	588.9	7.25e-05	0.0013	2	2	3.54e-10	11.5	1	0	12	240	0	0	226.9	0	0	21	8474	9	20	5434	5445	12	12	0	read	NM_194314.2	9606	360023	ZBTB41	FRBZ1|ZNF924	zinc finger and BTB domain containing 41	zinc finger and BTB domain-containing protein 41|FRBZ1 protein (FRBZ1)	NM_194314.2	NP_919290.2	NC_000001.11	protein-coding	VALIDATED	1	-	197153681	197201389	Reference GRCh38.p12 Primary Assembly
hsa-mir-497_25g	NM_001256127.1	1	549.5	549.5	0.0074	0.0238	1	1	6.54e-06	6.5	1	0	19	240	20	0	186.5	0	0	21	5073	2	20	1982	2000	19	19	0	read	NM_001256127.1	9606	387338	NSUN4	SHTAP	NOP2/Sun RNA methyltransferase family member 4	5-methylcytosine rRNA methyltransferase NSUN4|NOL1/NOP2/Sun domain family member 4|NOP2/Sun domain family, member 4|putative methyltransferase NSUN4|sperm head and tail associated protein	NM_001256127.1	NP_001243056.1	NC_000001.11	protein-coding	VALIDATED	1	+	46340176	46365151	Reference GRCh38.p12 Primary Assembly
hsa-mir-497_25g	NM_001162505.1	1	573	573	0.00399	0.028	2	2	3.54e-10	13	1	0	8	312	0	0	137	0	0	21	2286	14	21	583	590	8	8	0	read	NM_001162505.1	9606	387521	TMEM189	KUA	transmembrane protein 189	transmembrane protein 189	NM_001162505.1	NP_001155977.1	NC_000020.11	protein-coding	REVIEWED	20	-	50123736	50153797	Reference GRCh38.p12 Primary Assembly
hsa-mir-497_25g	NM_001001436.3	1	597.3	597.3	0.000784	0.00718	1	1	6.54e-06	9.5	1	0	16	248	0	0	260.3	0	0	21	7076	5	20	4401	4416	16	16	0	read	NM_001001436.3	9606	388272	C16orf87	-	chromosome 16 open reading frame 87	UPF0547 protein C16orf87	NM_001001436.3	NP_001001436.1	NC_000016.10	protein-coding	VALIDATED	16	-	46796606	46831470	Reference GRCh38.p12 Primary Assembly
hsa-mir-497_25g	NM_001301733.1	1	523.5	523.5	0.0642	0.0817	1	1	6.54e-06	8	1	0	20	240	4	0	185.5	0	0	21	1028	1	20	328	347	20	20	0	read	NM_001301733.1	9606	388753	COA6	C1orf31|CEMCOX4	cytochrome c oxidase assembly factor 6	cytochrome c oxidase assembly factor 6 homolog	NM_001301733.1	NP_001288662.1	NC_000001.11	protein-coding	REVIEWED	1	+	234373436	234384048	Reference GRCh38.p12 Primary Assembly
hsa-mir-497_25g	NM_203390.2	1	627	627	0.000425	0.00457	3	6	2.12e-07	13	1	0	9	240	0	0	228	0	0	21	5115	12	20	4536	4544	9	9	0	read	NM_203390.2	9606	389677	RBM12B	MGC:33837	RNA binding motif protein 12B	RNA-binding protein 12B	NM_203390.2	NP_976324.2	NC_000008.11	protein-coding	VALIDATED	8	-	93728162	93741011	Reference GRCh38.p12 Primary Assembly
hsa-mir-497_25g	NM_001013657.2	1	761.1	761.1	0.000548	0.00726	7	7	0	9	1	0	18	240	4	0	192.1	0	0	21	1351	3	20	206	223	18	18	0	read	NM_001013657.2	9606	390637	GDPGP1	C15orf58|VTC2	GDP-D-glucose phosphorylase 1	GDP-D-glucose phosphorylase 1|GDP-D-glucose phosphorylase C15orf58	NM_001013657.2	NP_001013679.2	NC_000015.10	protein-coding	VALIDATED	15	+	90234254	90242079	Reference GRCh38.p12 Primary Assembly
hsa-mir-497_25g	NM_001013659.2	1	614.4	614.4	0.00348	0.0143	2	2	3.54e-10	13	1	0	9	240	0	0	255.4	0	0	21	7136	12	20	314	322	9	9	0	read	NM_001013659.2	9606	390927	ZNF793	-	zinc finger protein 793	zinc finger protein 793	NM_001013659.2	NP_001013681.2	NC_000019.10	protein-coding	VALIDATED	19	+	37506938	37543336	Reference GRCh38.p12 Primary Assembly
hsa-mir-497_25g	NR_029520.1	1	605.7	605.7	0.0303	0.0449	3	3	2.18e-14	10	1	0	15	248	0	0	188.7	0	0	21	78	6	20	16	30	15	15	0	read	NR_029520.1	9606	406895	MIR103A1	MIR103-1|MIRN103-1|mir-103a-1	microRNA 103a-1	hsa-mir-103-1|hsa-mir-103a-1|microRNA 103-1	NR_029520.1	-	NC_000005.10	ncRNA	PROVISIONAL	5	-	168560895	168560972	Reference GRCh38.p12 Primary Assembly
hsa-mir-497_25g	NR_029519.1	1	4370.7	4370.7	0	0	97	111	0	10	1	0	15	248	0	0	193.7	0	0	21	78	6	20	16	30	15	15	0	read	NR_029519.1	9606	406896	MIR103A2	MIR103-2|MIRN103-2|mir-103a-2	microRNA 103a-2	hsa-mir-103-2|hsa-mir-103a-2|microRNA 103-2	NR_029519.1	-	NC_000020.11	ncRNA	PROVISIONAL	20	+	3917493	3917570	Reference GRCh38.p12 Primary Assembly
hsa-mir-497_25g	NR_029485.1	1	14134.2	14134.2	0	0	340	368	0	4	1	0	20	248	28	0	175.2	0	0	21	83	1	20	50	69	20	20	0	read	NR_029485.1	9606	406948	MIR15A	MIRN15A|hsa-mir-15a|miRNA15A|mir-15a	microRNA 15a	-	NR_029485.1	-	NC_000013.11	ncRNA	PROVISIONAL	13	-	50049118	50049200	Reference GRCh38.p12 Primary Assembly
hsa-mir-497_25g	NM_001004067.3	1	586.1	586.1	0.00343	0.0187	1	1	6.54e-06	9.5	1	0	15	312	0	0	178.1	0	0	21	4336	7	21	3151	3165	15	15	0	read	NM_001004067.3	9606	408050	NOMO3	Nomo	NODAL modulator 3	nodal modulator 3|pM5 protein 3|pM5 protein, middle copy	NM_001004067.3	NP_001004067.1	NC_000016.10	protein-coding	REVIEWED	16	+	16232531	16294810	Reference GRCh38.p12 Primary Assembly
hsa-mir-497_25g	NM_001013703.3	1	546.7	546.7	0.0196	0.0362	1	1	6.54e-06	6.5	1	0	20	248	16	0	178.7	0	0	21	5554	1	20	1775	1794	20	20	0	read	NM_001013703.3	9606	440275	EIF2AK4	GCN2|PVOD2	eukaryotic translation initiation factor 2 alpha kinase 4	eIF-2-alpha kinase GCN2|GCN2 eIF2alpha kinase|GCN2-like protein|general control nonderepressible 2	NM_001013703.3	NP_001013725.2	NC_000015.10	protein-coding	REVIEWED	15	+	39934100	40036152	Reference GRCh38.p12 Primary Assembly
hsa-mir-497_25g	NM_001078173.1	1	1010.1	1010.1	0.000415	0.00494	12	12	0	8	1	0	17	240	36	0	197.1	0	0	21	2038	4	20	799	815	17	17	0	read	NM_001078173.1	9606	441518	RTL8B	CXX1c|FAM127C|MAR8B|SIRH4	retrotransposon Gag like 8B	retrotransposon Gag-like protein 8B|Sushi-Ichi retrotransposon homolog 1|family with sequence similarity 127 member C|mammalian retrotransposon derived protein 8B|mammalian retrotransposon-derived 2|protein FAM127C	NM_001078173.1	NP_001071641.1	NC_000023.11	protein-coding	VALIDATED	X	-	135020503	135022535	Reference GRCh38.p12 Primary Assembly
hsa-mir-497_25g	NR_122111.1	1	732.7	732.7	1.92e-05	0.000258	4	4	0	8.5	1	0	20	240	16	0	275.7	0	0	21	4138	1	20	3065	3084	20	20	0	read	NR_122111.1	9606	503638	DUXAP9	LINC01296	double homeobox A pseudogene 9	lncRNA-CTD903|long intergenic non-protein coding RNA 1296	NR_122111.1	-	NC_000014.9	pseudo	VALIDATED	14	+	19062376	19107496	Reference GRCh38.p12 Primary Assembly
hsa-mir-497_25g	NR_015395.2	1	1038.2	1038.2	8.73e-05	0.00333	12	12	0	6	1	0	20	240	20	0	241.2	0	0	21	3887	1	20	694	713	20	20	0	read	NR_015395.2	9606	541471	MIR4435-2HG	AGD2|LINC00978|MIR4435-1HG|MORRBID|lncRNA-AWPPH	MIR4435-2 host gene	MIR4435-1 host gene (non-protein coding)|adipogenesis down-regulated transcript 2|lncRNA associated with poor prognosis of HCC|long intergenic non-protein coding RNA 978|myeloid RNA regulator of Bim-induced death	NR_015395.2	-	NC_000002.12	ncRNA	VALIDATED	2	-	111195865	111495160	Reference GRCh38.p12 Primary Assembly
hsa-mir-497_25g	NR_126049.1	1	646.8	646.8	0.000187	0.000883	3	3	2.18e-14	7	1	0	21	312	12	0	145.8	0	0	21	1424	1	21	419	439	21	21	0	read	NR_126049.1	9606	554249	LOC554249	-	uncharacterized LOC554249	-	NR_126049.1	-	NC_000009.12	ncRNA	VALIDATED	9	+	39873856	39875394	Reference GRCh38.p12 Primary Assembly
hsa-mir-497_25g	NM_001080529.2	1	639.7	639.7	0.0138	0.0608	1	1	6.54e-06	13	1	0	9	240	0	0	320.7	0	0	21	4195	12	20	2222	2230	9	9	0	read	NM_001080529.2	9606	644150	WIPF3	CR16	WAS/WASL interacting protein family member 3	WAS/WASL-interacting protein family member 3|corticosteroids and regional expression protein 16 homolog	NM_001080529.2	NP_001073998.2	NC_000007.14	protein-coding	VALIDATED	7	+	29806553	29917065	Reference GRCh38.p12 Primary Assembly
hsa-mir-497_25g	NR_003369.2	1	561.4	561.4	0.0135	0.0276	2	2	3.54e-10	9	1	0	17	240	12	0	179.4	0	0	21	2412	4	20	1516	1532	17	17	0	read	NR_003369.2	9606	653390	RRN3P2	-	RRN3 homolog, RNA polymerase I transcription factor pseudogene 2	RNA polymerase I transcription factor homolog pseudogene 2|RRN3 RNA polymerase I transcription factor homolog pseudogene|RRN3-like protein 1	NR_003369.2	-	NC_000016.10	pseudo	VALIDATED	16	+	29074841	29116717	Reference GRCh38.p12 Primary Assembly
hsa-mir-497_25g	NM_001144013.1	1	558.6	558.6	0.0135	0.039	2	2	3.54e-10	11	1	0	15	240	0	0	197.6	0	0	21	5873	6	20	5616	5630	15	15	0	read	NM_001144013.1	9606	653489	RGPD3	RGP3	RANBP2-like and GRIP domain containing 3	ranBP2-like and GRIP domain-containing protein 3	NM_001144013.1	NP_001137485.1	NC_000002.12	protein-coding	REVIEWED	2	-	106404679	106470934	Reference GRCh38.p12 Primary Assembly
hsa-mir-497_25g	NR_003015.1	1	595.4	595.4	0.000708	0.00527	1	1	6.54e-06	13	1	0	9	240	0	0	276.4	0	0	21	250	12	20	203	211	9	9	0	read	NR_003015.1	9606	677832	SNORA53	ACA53	small nucleolar RNA, H/ACA box 53	-	NR_003015.1	-	NC_000012.12	snoRNA	VALIDATED	12	+	98599634	98599883	Reference GRCh38.p12 Primary Assembly
hsa-mir-497_25g	NR_033770.1	1	581.5	581.5	0.00156	0.00427	1	3	0.0122	10	1	0	15	248	0	0	246.5	0	0	21	2479	6	20	1204	1218	15	15	0	read	NR_033770.1	9606	727758	ROCK1P1	-	Rho associated coiled-coil containing protein kinase 1 pseudogene 1	-	NR_033770.1	-	NC_000018.10	pseudo	VALIDATED	18	+	109064	122218	Reference GRCh38.p12 Primary Assembly
hsa-mir-497_25g	NM_001164463.1	2	840.5	558.6	0.00528	0.0217	2	2	3.54e-10	11	1	0	15	240	0	0	197.6	0	0	21	7299	6	20	5750	5764	15	15	0	read	NM_001164463.1	9606	727851	RGPD8	RANBP2L1|RGP8|RanBP2alpha	RANBP2-like and GRIP domain containing 8	RANBP2-like and GRIP domain-containing protein 8|RAN binding protein 2-like 1|ran-binding protein 2-like 3|ranBP2-like 3|ranBP2L3	NM_001164463.1	NP_001157935.1	NC_000002.12	protein-coding	VALIDATED	2	-	112368368	112433644	Reference GRCh38.p12 Primary Assembly
hsa-mir-497_25g	NM_001123363.3	2	840.5	558.6	0.00499	0.0288	2	2	3.54e-10	11	1	0	15	240	0	0	197.6	0	0	21	7640	6	20	6091	6105	15	15	0	read	NM_001123363.3	9606	729540	RGPD6	RGP6|RGPD7|RanBP2L1|RanBP2L2	RANBP2-like and GRIP domain containing 6	RANBP2-like and GRIP domain-containing protein 5/6|RANBP2-like and GRIP domain-containing protein 7|ran-binding protein 2-like 1/2|ranBP2-like 1/2	NM_001123363.3	NP_001116835.1	NC_000002.12	protein-coding	VALIDATED	2	-	110513801	110610902	Reference GRCh38.p12 Primary Assembly
hsa-mir-497_25g	NR_026952.1	1	599.1	599.1	0.00112	0.00365	3	3	2.18e-14	9	1	0	19	152	8	0	277.1	0	0	21	2586	2	20	201	219	19	19	0	read	NR_026952.1	9606	729799	SEC14L1P1	-	SEC14 like 1 pseudogene 1	-	NR_026952.1	-	NC_000011.10	pseudo	PROVISIONAL	11	+	43897302	43899887	Reference GRCh38.p12 Primary Assembly
hsa-mir-497_25g	NR_027423.1	1	641.8	641.8	0.000483	0.00225	2	2	3.54e-10	5.5	1	1	20	240	28	0	246.8	0	0	21	1432	1	20	1249	1267	20	19	0	read	NR_027423.1	9606	100128890	FAM66B	FAM66E	family with sequence similarity 66 member B	family with sequence similarity 66, member E	NR_027423.2	-	NC_000008.11	ncRNA	VALIDATED	8	-	7298743	7355362	Reference GRCh38.p12 Primary Assembly
hsa-mir-497_25g	NR_132983.1	1	550.4	550.4	3.31e-05	0.000148	1	1	6.54e-06	8	1	0	20	240	16	0	206.4	0	0	21	815	1	20	641	660	20	20	0	read	NR_132983.1	9606	100129781	MIR193BHG	-	MIR193B host gene	-	NR_132983.1	-	NC_000016.10	ncRNA	VALIDATED	16	+	14302287	14326516	Reference GRCh38.p12 Primary Assembly
hsa-mir-497_25g	NM_001290210.1	1	581.7	581.7	0.0114	0.0334	1	1	6.54e-06	8	1	0	20	240	8	0	249.7	0	0	21	1221	1	20	1050	1069	20	20	0	read	NM_001290210.1	9606	100131827	ZNF717	X17|ZNF838	zinc finger protein 717	zinc finger protein 717|krueppel-like factor X17|kruppel-like zinc finger factor X17|zinc finger protein 838	NM_001290210.1	NP_001277139.1	NC_000003.12	protein-coding	REVIEWED	3	-	75729960	75785582	Reference GRCh38.p12 Primary Assembly
hsa-mir-497_25g	NR_027460.1	1	559.2	559.2	0.00357	0.0131	2	2	3.54e-10	9	1	0	17	240	12	0	177.2	0	0	21	2492	4	20	1180	1196	17	17	0	read	NR_027460.1	9606	100131998	RRN3P3	-	RRN3 homolog, RNA polymerase I transcription factor pseudogene 3	RNA polymerase I transcription factor homolog pseudogene 3|RRN3 RNA polymerase I transcription factor homolog pseudogene	NR_027460.1	-	NC_000016.10	pseudo	PROVISIONAL	16	-	22419545	22437714	Reference GRCh38.p12 Primary Assembly
hsa-mir-497_25g	NR_027424.1	1	641.8	641.8	1.36e-06	1.84e-05	2	2	3.54e-10	5.5	1	1	20	240	28	0	246.8	0	0	21	1434	1	20	1251	1269	20	19	0	read	NR_027424.1	9606	100132103	FAM66E	-	family with sequence similarity 66 member E	-	NR_027424.1	-	NC_000008.11	ncRNA	PREDICTED	8	+	7955012	8008754	Reference GRCh38.p12 Primary Assembly
hsa-mir-497_25g	NM_001113324.2	1	552.4	552.4	0.0071	0.0237	1	1	6.54e-06	9	1	0	18	240	20	0	205.4	0	0	21	1010	3	20	295	312	18	18	0	read	NM_001113324.2	9606	100134934	TEN1	C17orf106	TEN1, CST complex subunit	CST complex subunit TEN1|TEN1 telomerase capping complex subunit homolog|protein telomeric pathways with STN1 homolog|telomere length regulation protein TEN1 homolog|telomeric pathways in association with Stn1, number 1	NM_001113324.2	NP_001106795.2	NC_000017.11	protein-coding	VALIDATED	17	+	75979216	76000585	Reference GRCh38.p12 Primary Assembly
hsa-mir-497_25g	NM_001205254.1	1	540.9	540.9	0.12	0.14	1	1	6.54e-06	9	1	0	20	240	4	0	214.9	0	0	21	6221	1	20	5296	5315	20	20	0	read	NM_001205254.1	9606	100506658	OCLN	BLCPMG|PPP1R115|PTORCH1	occludin	occludin|phosphatase 1, regulatory subunit 115|tight junction protein occludin	NM_001205254.1	NP_001192183.1	NC_000005.10	protein-coding	REVIEWED	5	+	69492291	69558103	Reference GRCh38.p12 Primary Assembly
hsa-mir-497_25g	NR_038284.1	1	567	567	0.00204	0.00494	1	1	6.54e-06	12	1	0	10	240	0	0	242	0	0	21	4093	11	20	1788	1797	10	10	0	read	NR_038284.1	9606	100507034	PITRM1-AS1	-	PITRM1 antisense RNA 1	-	NR_038284.1	-	NC_000010.11	ncRNA	VALIDATED	10	+	3141600	3148628	Reference GRCh38.p12 Primary Assembly
hsa-mir-497_25g	NR_037709.1	1	552.4	552.4	0.00443	0.0221	1	1	6.54e-06	9	1	0	18	240	20	0	205.4	0	0	21	3330	3	20	295	312	18	18	0	read	NR_037709.1	9606	100529145	TEN1-CDK3	C17orf106-CDK3	TEN1-CDK3 readthrough (NMD candidate)	TEN1-CDK3 readthrough (non-protein coding)	NR_037709.1	-	NC_000017.11	ncRNA	VALIDATED	17	+	75979216	76005998	Reference GRCh38.p12 Primary Assembly
hsa-mir-497_25g	NM_001204173.1	1	815	815	6.33e-05	0.000907	8	16	1.11e-16	10.5	1	0	17	152	4	0	300	0	0	21	4563	4	20	4428	4444	17	17	0	read	NM_001204173.1	9606	100533105	C8orf44-SGK3	-	C8orf44-SGK3 readthrough	serine/threonine-protein kinase Sgk3|cytokine-independent survival kinase|serum/glucocorticoid-regulated kinase 3	NM_001204173.1	NP_001191102.1	NC_000008.11	protein-coding	VALIDATED	8	+	66667551	66862021	Reference GRCh38.p12 Primary Assembly
hsa-mir-497_25g	NM_001204848.1	1	1943.6	1943.6	0	0	35	35	0	6.5	1	1	17	312	28	0	152.6	0	0	21	1948	5	21	414	429	17	16	0	read	NM_001204848.1	9606	100534012	TNFAIP8L2-SCNM1	-	TNFAIP8L2-SCNM1 readthrough	TNFAIP8L2-SCNM1 protein	NM_001204848.1	NP_001191777.1	NC_000001.11	protein-coding	VALIDATED	1	+	151156628	151170296	Reference GRCh38.p12 Primary Assembly
hsa-mir-497_25g	NM_001256141.1	1	646.2	646.2	0.00118	0.0198	2	2	3.54e-10	13	1	0	9	240	0	0	287.2	0	0	21	5418	12	20	3819	3827	9	9	0	read	NM_001256141.1	9606	100861412	FSBP	-	fibrinogen silencer binding protein	fibrinogen silencer-binding protein	NM_001256141.1	NP_001243070.1	NC_000008.11	protein-coding	VALIDATED	8	-	94427711	94436951	Reference GRCh38.p12 Primary Assembly
hsa-mir-497_25g	NR_073584.1	1	536.4	536.4	0.00571	0.0238	1	1	6.54e-06	10	1	0	16	152	0	0	302.4	0	0	21	1818	5	20	920	935	16	16	0	read	NR_073584.1	9606	101180901	IPO11-LRRC70	-	IPO11-LRRC70 readthrough	-	NR_073584.1	-	NC_000005.10	ncRNA	VALIDATED	5	+	62578734	62628588	Reference GRCh38.p12 Primary Assembly
hsa-mir-497_25g	NR_126027.1	1	602.3	602.3	5.64e-06	4.72e-05	1	1	6.54e-06	11	1	0	13	240	0	0	279.3	0	0	21	780	8	20	291	303	13	13	0	read	NR_126027.1	9606	101929402	EXTL3-AS1	C8orf50	EXTL3 antisense RNA 1	EXTL3 antisense RNA 1 (non-protein coding)	NR_126027.1	-	NC_000008.11	ncRNA	VALIDATED	8	-	28698402	28701463	Reference GRCh38.p12 Primary Assembly
hsa-mir-497_25g	NR_126048.1	1	646.8	646.8	1.09e-06	1.3e-05	3	3	2.18e-14	7	1	0	21	312	12	0	145.8	0	0	21	1428	1	21	423	443	21	21	0	read	NR_126048.1	9606	102724238	LOC102724238	-	uncharacterized LOC102724238	-	NR_126048.2	-	NC_000009.12	ncRNA	VALIDATED	9	-	62374480	62376869	Reference GRCh38.p12 Primary Assembly
hsa-mir-497_25g	NM_001320643.2	1	1061.8	1061.8	3.01e-07	1.04e-05	13	13	0	11	1	0	12	240	0	0	255.8	0	0	21	4805	9	20	1191	1202	12	12	0	read	NM_001320643.2	9606	102724428	SIK1B	-	salt inducible kinase 1B (putative)	serine/threonine-protein kinase SIK1	NM_001320643.2	NP_001307572.1	NC_000021.9	protein-coding	VALIDATED	21	+	6111072	6123777	Reference GRCh38.p12 Primary Assembly
hsa-mir-497_25g	NM_001320646.1	1	559.9	559.9	0.0178	0.0411	1	1	6.54e-06	11	1	0	12	312	0	0	159.9	0	0	21	989	10	21	568	579	12	12	0	read	NM_001320646.1	9606	102724594	U2AF1L5	-	U2 small nuclear RNA auxiliary factor 1 like 5	splicing factor U2AF 35 kDa subunit-like protein|U2 small nuclear RNA auxiliary factor 1-like protein 5|splicing factor U2AF 35 kDa subunit	NM_001320646.1	NP_001307575.1	NC_000021.9	protein-coding	VALIDATED	21	-	6484622	6499968	Reference GRCh38.p12 Primary Assembly
hsa-mir-497_25g	NR_147989.1	2	1089.3	574	0.0102	0.0396	2	3	4.77e-07	6	1	1	21	240	12	0	197	0	0	21	3531	1	20	2916	2936	20	21	0	read	NR_147989.1	9606	107986827	CZ1P-ASNS	-	CZ1P-ASNS readthrough	-	NR_147989.1	-	NC_000007.14	ncRNA	VALIDATED	7	-	97852116	97972357	Reference GRCh38.p12 Primary Assembly
hsa-mir-497_25g	NM_001349704.1	1	13124.8	13124.8	0	0	326	326	0	8.5	1	0	16	-12	-10	0	49.8	0	0	21	5110	1	16	1566	1581	16	16	11	read	NM_001349704.1	9606	10808	HSPH1	HSP105|HSP105A|HSP105B|NY-CO-25	heat shock protein family H (Hsp110) member 1	heat shock protein 105 kDa|antigen NY-CO-25|heat shock 105kDa/110kDa protein 1	NM_001349704.1	NP_001336633.1	NC_000013.11	protein-coding	REVIEWED	13	-	31134973	31162387	Reference GRCh38.p12 Primary Assembly
hsa-mir-497_25g	NR_029605.1	1	11995.7	11995.7	0	0	298	723	0	6.5	1	0	16	-12	-10	0	30.7	0	0	21	110	1	16	68	83	16	16	11.5	read	NR_029605.1	9606	407043	MIR7-1	MIRN7-1|hsa-mir-7-1|mir-7-1	microRNA 7-1	miR-7-5p	NR_029605.1	-	NC_000009.12	ncRNA	PROVISIONAL	9	-	83969747	83969856	Reference GRCh38.p12 Primary Assembly
hsa-mir-497_25g	NM_001114176.1	1	5066.2	5066.2	0	0	114	114	0	7.5	1	1	20	248	24	0	189.2	0	0	21	5099	2	20	2180	2199	19	20	0	read	NM_001114176.1	9606	121536	AEBP2	-	AE binding protein 2	zinc finger protein AEBP2|AE(adipocyte enhancer)-binding protein 2|adipocyte enhancer-binding protein 2	NM_001114176.1	NP_001107648.1	NC_000012.12	protein-coding	VALIDATED	12	+	19404100	19522238	Reference GRCh38.p12 Primary Assembly
hsa-mir-497_25g	NM_001259.6	2	8296.2	4498.9	0	0	98	98	0	5	1	1	20	248	44	0	230.9	0	0	21	11628	1	20	1662	1680	20	19	0	read	NM_001259.6	9606	1021	CDK6	MCPH12|PLSTIRE	cyclin dependent kinase 6	cyclin-dependent kinase 6|cell division protein kinase 6|serine/threonine-protein kinase PLSTIRE	NM_001259.7	NP_001250.1	NC_000007.14	protein-coding	REVIEWED	7	-	92604920	92836626	Reference GRCh38.p12 Primary Assembly
hsa-mir-497_25g	NM_001031685.2	2	3726	3184	0	0	67	73	0	7	1	0	16	248	0	0	189	0	0	21	4670	5	20	3295	3310	16	16	0	read	NM_001031685.2	9606	7159	TP53BP2	53BP2|ASPP2|BBP|P53BP2|PPP1R13A	tumor protein p53 binding protein 2	apoptosis-stimulating of p53 protein 2|BCL2-binding protein|apoptosis-stimulating protein of p53, 2|renal carcinoma antigen NY-REN-51|tumor suppressor p53-binding protein 2	NM_001031685.2	NP_001026855.2	NC_000001.11	protein-coding	REVIEWED	1	-	223779892	223845971	Reference GRCh38.p12 Primary Assembly
hsa-mir-497_25g	NM_001329128.1	2	2870.3	2530.9	0	0	51	51	0	10	1	0	16	240	0	0	206.9	0	0	21	2295	5	20	1810	1825	16	16	0	read	NM_001329128.1	9606	3460	IFNGR2	AF-1|IFGR2|IFNGT1|IMD28	interferon gamma receptor 2	interferon gamma receptor 2|IFN-gamma receptor 2|IFN-gamma-R-beta|IFN-gamma-R2|interferon gamma receptor accessory factor-1|interferon gamma receptor beta chain|interferon gamma transducer 1	NM_001329128.1	NP_001316057.1	NC_000021.9	protein-coding	REVIEWED	21	+	33402895	33437520	Reference GRCh38.p12 Primary Assembly
hsa-mir-497_25g	NM_001282917.1	1	2092.7	2092.7	0	0	46	46	0	10	1	0	11	152	0	0	42.7	0	0	21	8541	9	19	209	219	11	11	11	read	NM_001282917.1	9606	57148	RALGAPB	KIAA1219|RalGAPbeta	Ral GTPase activating protein non-catalytic beta subunit	ral GTPase-activating protein subunit beta|Ral GTPase activating protein, beta subunit (non-catalytic)	NM_001282917.1	NP_001269846.1	NC_000020.11	protein-coding	VALIDATED	20	+	38472805	38578860	Reference GRCh38.p12 Primary Assembly
hsa-mir-497_25g	NM_017580.2	1	2364.7	2364.7	0	0	45	46	0	6.5	1	0	20	240	8	0	259.7	0	0	21	4942	1	20	3919	3938	20	20	0	read	NM_017580.2	9606	54764	ZRANB1	TRABID	zinc finger RANBP2-type containing 1	ubiquitin thioesterase ZRANB1|TRAF-binding domain-containing protein|TRAF-binding protein domain|hTrabid|zinc finger Ran-binding domain-containing protein 1|zinc finger, RAN-binding domain containing 1	NM_017580.2	NP_060050.2	NC_000010.11	protein-coding	VALIDATED	10	+	124939488	124987435	Reference GRCh38.p12 Primary Assembly
hsa-mir-497_25g	NM_005121.2	1	2385.4	2385.4	0	0	44	48	0	13	1	0	8	312	0	0	269.4	0	0	21	10474	14	21	10332	10339	8	8	0	read	NM_005121.2	9606	9969	MED13	ARC250|DRIP250|HSPC221|THRAP1|TRAP240	mediator complex subunit 13	mediator of RNA polymerase II transcription subunit 13|activator-recruited cofactor 250 kDa component|mediator of RNA polymerase II transcription, subunit 13 homolog|thyroid hormone receptor-associated protein 1|thyroid hormone receptor-associated protein complex 240 kDa component|thyroid hormone receptor-associated protein complex component TRAP240|thyroid hormone receptor-associated protein, 24…	NM_005121.2	NP_005112.2	NC_000017.11	protein-coding	REVIEWED	17	-	61942604	62065982	Reference GRCh38.p12 Primary Assembly
hsa-mir-497_25g	NM_014167.4	1	2201.6	2201.6	0	0	42	42	0	13	1	0	9	240	0	0	242.6	0	0	21	1617	12	20	797	805	9	9	0	read	NM_014167.4	9606	29080	CCDC59	BR22|HSPC128|TAP26	coiled-coil domain containing 59	thyroid transcription factor 1-associated protein 26|TTF-1-associated protein 26|TTF-1-associated protein BR2|coiled-coil domain-containing protein 59	NM_014167.4	NP_054886.2	NC_000012.12	protein-coding	VALIDATED	12	-	82352303	82358804	Reference GRCh38.p12 Primary Assembly
hsa-mir-497_25g	NM_001270399.1	2	2170.5	1640.5	1.75e-10	2.64e-08	29	29	0	8	1	0	18	240	12	0	174.5	0	0	21	2490	3	20	1837	1854	18	18	0	read	NM_001270399.1	9606	7846	TUBA1A	B-ALPHA-1|LIS3|TUBA3	tubulin alpha 1a	tubulin alpha-1A chain|hum-a-tub1|hum-a-tub2|tubulin B-alpha-1|tubulin alpha-3 chain|tubulin, alpha, brain-specific	NM_001270399.1	NP_001257328.1	NC_000012.12	protein-coding	REVIEWED	12	-	49184794	49189323	Reference GRCh38.p12 Primary Assembly
hsa-mir-497_25g	NM_001273.3	1	1605.4	1605.4	1.55e-10	2.26e-08	26	26	0	7.5	1	0	19	240	28	0	240.4	0	0	21	6559	2	20	767	785	19	19	0	read	NM_001273.3	9606	1108	CHD4	CHD-4|Mi-2b|Mi2-BETA|SIHIWES	chromodomain helicase DNA binding protein 4	chromodomain-helicase-DNA-binding protein 4|ATP-dependent helicase CHD4|Mi-2 autoantigen 218 kDa protein	NM_001273.4	NP_001264.2	NC_000012.12	protein-coding	REVIEWED	12	-	6570081	6607438	Reference GRCh38.p12 Primary Assembly
hsa-mir-497_25g	NM_001241.3	1	1440.4	1440.4	2.08e-13	2.02e-11	24	26	0	6	1	1	21	240	12	0	181.4	0	0	21	6822	1	20	2208	2228	20	21	0	read	NM_001241.3	9606	905	CCNT2	CYCT2	cyclin T2	cyclin-T2|SDS-stable vimentin-bound DNA fragment HEF42VIM22|cyclin T2a|cyclin T2b|subunit of positive elongation transcription factor b	NM_001241.3	NP_001232.1	NC_000002.12	protein-coding	REVIEWED	2	+	134918809	134959344	Reference GRCh38.p12 Primary Assembly
hsa-mir-497_25g	NM_001102575.1	1	1354.4	1354.4	4.55e-11	6.42e-09	21	21	0	9.5	1	0	18	240	8	0	226.4	0	0	21	5238	3	20	3517	3534	18	18	0	read	NM_001102575.1	9606	112574	SNX18	SH3PX2|SH3PXD3B|SNAG1	sorting nexin 18	sorting nexin-18|SH3 and PX domain-containing protein 3B|sorting nexin associated golgi protein 1|sorting nexin-associated Golgi protein 1	NM_001102575.1	NP_001096045.1	NC_000005.10	protein-coding	REVIEWED	5	+	54517758	54619248	Reference GRCh38.p12 Primary Assembly
hsa-mir-497_25g	NM_001264573.1	1	1278.9	1278.9	3.04e-10	1.5e-08	20	20	0	13	1	0	8	248	0	0	186.9	0	0	21	4308	13	20	3520	3527	8	8	0	read	NM_001264573.1	9606	146909	KIF18B	-	kinesin family member 18B	kinesin-like protein KIF18B	NM_001264573.1	NP_001251503.1	NC_000017.11	protein-coding	VALIDATED	17	-	44924710	44947745	Reference GRCh38.p12 Primary Assembly
hsa-mir-497_25g	NM_001693.3	1	1275.7	1275.7	6.12e-13	5.66e-11	19	19	0	10	1	0	12	248	0	0	212.7	0	0	21	3054	9	20	1390	1401	12	12	0	read	NM_001693.3	9606	526	ATP6V1B2	ATP6B1B2|ATP6B2|DOOD|HO57|VATB|VPP3|Vma2|ZLS2	ATPase H+ transporting V1 subunit B2	V-type proton ATPase subunit B, brain isoform|ATPase, H+ transporting, lysosomal 56/58kDa, V1 subunit B2|H+ transporting two-sector ATPase|V-ATPase B2 subunit|V-ATPase subunit B 2|endomembrane proton pump 58 kDa subunit|testicular secretory protein Li 65|vacuolar H+-ATPase 56,000 subunit|vacuolar proton pump subunit B 2	NM_001693.3	NP_001684.2	NC_000008.11	protein-coding	REVIEWED	8	+	20197192	20226851	Reference GRCh38.p12 Primary Assembly
hsa-mir-497_25g	NM_001195677.1	1	1253	1253	9.22e-09	1.82e-06	18	22	0	8	1	0	20	240	4	0	240	0	0	21	7587	1	20	6993	7012	20	20	0	read	NM_001195677.1	9606	9217	VAPB	ALS8|VAMP-B|VAP-B	VAMP associated protein B and C	vesicle-associated membrane protein-associated protein B/C|VAMP (vesicle-associated membrane protein)-associated protein B and C|VAMP-associated 33 kDa protein	NM_001195677.1	NP_001182606.1	NC_000020.11	protein-coding	REVIEWED	20	+	58389118	58451100	Reference GRCh38.p12 Primary Assembly
hsa-mir-497_25g	NM_001177381.1	2	1888.5	1305	4.53e-12	1.08e-09	18	19	0	9.5	1	0	18	240	12	0	293	0	0	21	6797	3	20	5729	5746	18	18	0	read	NM_001177381.1	9606	132864	CPEB2	CPE-BP2|CPEB-2|hCPEB-2	cytoplasmic polyadenylation element binding protein 2	cytoplasmic polyadenylation element-binding protein 2|CPE-binding protein 2	NM_001177381.1	NP_001170852.1	NC_000004.12	protein-coding	REVIEWED	4	+	15002425	15070152	Reference GRCh38.p12 Primary Assembly
hsa-mir-497_25g	NM_001145966.1	1	1118.5	1118.5	1.93e-09	1.75e-07	16	16	0	7	1	1	19	160	20	0	254.5	0	0	21	11427	2	20	10200	10217	19	18	0	read	NM_001145966.1	9606	4288	MKI67	KIA|MIB-|MIB-1|PPP1R105	marker of proliferation Ki-67	proliferation marker protein Ki-67|antigen Ki67|antigen identified by monoclonal antibody Ki-67|proliferation-related Ki-67 antigen|protein phosphatase 1, regulatory subunit 105	NM_001145966.1	NP_001139438.1	NC_000010.11	protein-coding	REVIEWED	10	-	128096658	128126404	Reference GRCh38.p12 Primary Assembly
[truncated: 878 more rows]

## Sheet: TableS4.2
Table S4.2 The targets of 4 selected miRNAs. The targets of hsa-mir-411-5p, hsa-miR-497-5p, hsa-mir-1251-5p and hsa-mir-1301-3p were predicted with the MiCPAR algorithm (see Methods) using 11 PAR-CLIP sequecing profiles in Table S1.3. Only targets having at least 1 PAR-CLIP read with T-to-C variation were included in the list here.
[truncated: 3,122 more rows]
