# Supplementary material for: Characterizing Relevant MicroRNA Editing Sites in Parkinson’s Disease
Source: Cells. 2022 Dec 24;12(1):75. doi: 10.3390/cells12010075 (PMC9818192; doi:10.3390/cells12010075)
Supplement: Supplementary file 1 [file cells-12-00075-s001.zip › TableS5_GO-and-KEGG-2021-04-06.xlsx]

## Sheet: TableS5.1
Table S5.1 The enriched GO terms of targets of 4 selected miRNAs. Targets that only belong to the original miRNAs were extracted from Table S4. The enriched GO terms were calculated using KOBAS2 and the GO terms with Corrected_P_value smaller than 0.05 were listed here.
miRNA	GO_ID	Ontology	Term	Database	Input_num	Background_num	P_Value	Corrected_P_Value	Input	Hyperlink
hsa-miR-1251-5p	GO:0043233	CC	organelle lumen	Gene Ontology	26	725	2.35188e-12	4.73317e-09	64434|54700|4088|55269|4204|7078|9837|10687|2119|9782|154007|65109|8732|4097|3708|4775|4799|4163|2957|203228|56929|4751|88745|10594|9512|10492	http://amigo.geneontology.org/amigo/term/GO:0043233
hsa-miR-1251-5p	GO:0005622	CC	intracellular	Gene Ontology	45	2228	5.98315e-12	6.02054e-09	55920|6815|10009|6891|100463488|56919|537|1054|8092|6000|7716|9837|5562|100996939|1500|65109|1653|23152|55744|54542|23741|309|53344|57532|4097|158399|57697|3839|9532|2182|3708|4775|5756|7552|9589|58505|4170|5713|51663|221178|8936|3097|9512|4853|25957	http://amigo.geneontology.org/amigo/term/GO:0005622
hsa-miR-1251-5p	GO:0006725	BP	cellular aromatic compound metabolic process	Gene Ontology	27	913	6.04514e-11	4.05528e-08	29896|55269|7799|195828|10212|56919|1054|8092|5230|5562|2119|1500|522|57169|8732|1316|990|88745|23543|9589|7562|5713|2237|149041|5982|10594|55659	http://amigo.geneontology.org/amigo/term/GO:0006725
hsa-miR-1251-5p	GO:0031974	CC	membrane-enclosed lumen	Gene Ontology	21	697	6.61308e-09	3.3272e-06	23741|55920|10000|221178|5982|4751|57697|26953|58508|9837|51663|2119|80119|3097|54542|4853|9212|26515|9589|11278|63035	http://amigo.geneontology.org/amigo/term/GO:0031974
hsa-miR-1251-5p	GO:0019222	BP	regulation of metabolic process	Gene Ontology	24	974	2.29195e-08	9.22512e-06	6815|10009|7799|403341|9321|63035|5562|7078|7579|161582|7071|5984|1500|523|65109|23152|4097|5144|9212|6173|7562|84807|55659|2537	http://amigo.geneontology.org/amigo/term/GO:0019222
hsa-miR-1251-5p	GO:0005634	CC	nucleus	Gene Ontology	25	1182	1.98852e-07	5.79517e-05	55082|54700|598|6815|10514|7078|7074|167153|1500|4204|7552|23152|151126|23741|55629|10269|26953|4775|4799|9212|11278|10687|80232|84807|80119	http://amigo.geneontology.org/amigo/term/GO:0005634
hsa-miR-1251-5p	GO:0032991	CC	protein-containing complex	Gene Ontology	18	639	2.15969e-07	5.79517e-05	988|9589|8092|29888|8065|5142|9837|100996939|79902|154007|23367|10594|523|26515|51138|6173|10514|522	http://amigo.geneontology.org/amigo/term/GO:0032991
hsa-miR-1251-5p	GO:0051171	BP	regulation of nitrogen compound metabolic process	Gene Ontology	21	900	4.29304e-07	9.09448e-05	4666|988|54700|1054|7562|6670|55213|4799|6815|7071|7248|195828|7074|80119|4216|403341|5510|7552|11278|2537|3097	http://amigo.geneontology.org/amigo/term/GO:0051171
hsa-miR-1251-5p	GO:0044237	BP	cellular metabolic process	Gene Ontology	30	1718	6.25263e-07	0.000116276	10000|4088|23367|56919|149041|158399|4942|5230|9837|7248|7514|387104|1653|2261|308|29896|990|57697|9826|4799|7562|2957|51138|6792|29105|4666|2571|10594|9512|4853	http://amigo.geneontology.org/amigo/term/GO:0044237
hsa-miR-1251-5p	GO:2000112	BP	regulation of cellular macromolecule biosynthetic process	Gene Ontology	17	619	6.64433e-07	0.000116276	6670|990|6659|5167|5982|55213|79692|7716|58508|84807|7799|7579|7514|403341|23019|4666|8092	http://amigo.geneontology.org/amigo/term/GO:2000112
hsa-miR-1251-5p	GO:0031981	CC	nuclear lumen	Gene Ontology	16	603	2.19289e-06	0.000326903	56929|64434|10000|4097|4170|10009|5984|51663|221178|9782|154007|403341|4853|1653|29105|4204	http://amigo.geneontology.org/amigo/term/GO:0031981
hsa-miR-1251-5p	GO:0044260	BP	cellular macromolecule metabolic process	Gene Ontology	24	1269	2.4017e-06	0.00033334	55082|23321|84992|400569|56919|84750|161582|5984|167153|5924|100996939|7514|10269|23152|57169|55744|158399|55213|54542|9212|7562|359948|7586|149041	http://amigo.geneontology.org/amigo/term/GO:0044260
hsa-miR-1251-5p	GO:0046483	BP	heterocycle metabolic process	Gene Ontology	20	940	3.20126e-06	0.000415647	988|57169|7562|4775|6659|116028|4751|4666|90121|2237|152006|7579|80119|88745|55629|84807|400569|2957|5144|79066	http://amigo.geneontology.org/amigo/term/GO:0046483
hsa-miR-1251-5p	GO:0005515	MF	protein binding	Gene Ontology	28	1688	3.98813e-06	0.000445895	54726|10000|55204|4204|2957|1054|5984|27348|56605|23019|2261|308|1316|64795|8065|26953|9729|6670|9589|6792|22841|2237|3843|642|57179|2537|57216|9662	http://amigo.geneontology.org/amigo/term/GO:0005515
hsa-miR-1251-5p	GO:0043226	CC	organelle	Gene Ontology	32	2086	3.87099e-06	0.000445895	64434|54700|4088|84992|6891|56919|63035|23243|84750|9589|7078|116028|7071|100996939|7514|522|23019|64864|57532|129831|57697|64110|6670|3267|5510|2957|55906|80218|11258|149041|10594|9662	http://amigo.geneontology.org/amigo/term/GO:0043226
hsa-miR-1251-5p	GO:0010605	BP	negative regulation of macromolecule metabolic process	Gene Ontology	13	427	4.83858e-06	0.000512507	55629|990|6659|4088|2058|167153|23019|79902|4799|23543|6173|10514|7532	http://amigo.geneontology.org/amigo/term/GO:0010605
hsa-miR-1251-5p	GO:0043170	BP	macromolecule metabolic process	Gene Ontology	25	1440	6.35061e-06	0.000629569	10000|23321|84992|403341|10212|8237|2119|7579|7071|167153|100996939|56605|8732|4097|55213|88745|9212|6173|7562|170960|4751|84807|55659|4853|10492	http://amigo.geneontology.org/amigo/term/GO:0043170
hsa-miR-1251-5p	GO:1901576	BP	organic substance biosynthetic process	Gene Ontology	20	990	6.7688e-06	0.000633591	58505|6670|1737|7562|170960|7716|7579|55213|7586|57697|84992|5562|2571|7799|1500|55629|3097|9212|80119|7011	http://amigo.geneontology.org/amigo/term/GO:1901576
hsa-miR-1251-5p	GO:0030554	MF	adenyl nucleotide binding	Gene Ontology	10	262	9.47484e-06	0.000847472	6891|990|5982|2058|11065|167153|537|2182|2261|7011	http://amigo.geneontology.org/amigo/term/GO:0030554
hsa-miR-1251-5p	GO:1901362	BP	organic cyclic compound biosynthetic process	Gene Ontology	16	689	1.11987e-05	0.000959038	55629|54700|170960|5167|5982|55213|4775|4853|7579|1500|9826|522|4751|6240|23152|8732	http://amigo.geneontology.org/amigo/term/GO:1901362
hsa-miR-1251-5p	GO:0048519	BP	negative regulation of biological process	Gene Ontology	17	777	1.25931e-05	0.00101375	23741|308|57616|4170|4088|5142|7071|5562|51776|4163|4775|55629|653464|23019|9212|7514|4204	http://amigo.geneontology.org/amigo/term/GO:0048519
hsa-miR-1251-5p	GO:0009059	BP	macromolecule biosynthetic process	Gene Ontology	18	869	1.42929e-05	0.00110633	55659|1054|990|4216|10212|55213|2058|57697|56919|58508|84992|4775|3097|4751|1653|2957|4097|57216	http://amigo.geneontology.org/amigo/term/GO:0009059
hsa-miR-1251-5p	GO:0005488	MF	binding	Gene Ontology	32	2247	1.69416e-05	0.00121768	55082|90121|29888|55269|7799|7178|10514|57616|2119|130162|5984|100996939|51776|1316|158399|10269|5144|133015|64110|3708|10228|9662|3267|54542|7562|7586|22841|51663|221178|3843|3097|10492	http://amigo.geneontology.org/amigo/term/GO:0005488
hsa-miR-1251-5p	GO:0012501	BP	programmed cell death	Gene Ontology	10	289	2.14071e-05	0.00136851	309|4170|598|5924|9826|9212|7078|4853|7178|151126	http://amigo.geneontology.org/amigo/term/GO:0012501
hsa-miR-1251-5p	GO:0044271	BP	cellular nitrogen compound biosynthetic process	Gene Ontology	17	813	2.21002e-05	0.00136851	57616|54700|7562|6659|5144|84807|7799|79902|23367|5984|10212|23543|64864|23152|57169|4853|4204	http://amigo.geneontology.org/amigo/term/GO:0044271
hsa-miR-1251-5p	GO:0090304	BP	nucleic acid metabolic process	Gene Ontology	17	811	2.14392e-05	0.00136851	55082|7579|4097|5167|51340|55213|55269|5562|23019|400569|54700|195828|64864|23543|7552|7586|29896	http://amigo.geneontology.org/amigo/term/GO:0090304
hsa-miR-1251-5p	GO:1901363	MF	heterocyclic compound binding	Gene Ontology	17	813	2.21002e-05	0.00136851	29896|6792|158399|116028|5142|57697|11065|7071|9532|51663|3097|523|65109|195828|54542|4204|8092	http://amigo.geneontology.org/amigo/term/GO:1901363
hsa-miR-1251-5p	GO:0032502	BP	developmental process	Gene Ontology	18	932	3.50978e-05	0.00204737	54700|5167|7074|4751|7716|7071|5562|6517|3708|8936|4216|59345|3267|4853|1653|55906|29105|10514	http://amigo.geneontology.org/amigo/term/GO:0032502
hsa-miR-1251-5p	GO:0043231	CC	intracellular membrane-bounded organelle	Gene Ontology	25	1606	3.79196e-05	0.00214967	8036|54014|6815|9652|403341|5510|56919|9321|221178|7579|203228|57169|55920|990|84450|23543|6792|55906|10247|58505|51164|6659|7716|163859|5982	http://amigo.geneontology.org/amigo/term/GO:0043231
hsa-miR-1251-5p	GO:0005694	CC	chromosome	Gene Ontology	7	140	4.17564e-05	0.00230232	4088|79902|51663|80119|9212|5510|7011	http://amigo.geneontology.org/amigo/term/GO:0005694
hsa-miR-1251-5p	GO:0010243	BP	response to organonitrogen compound	Gene Ontology	7	142	4.55067e-05	0.00244219	990|7074|598|5142|7248|3843|59345	http://amigo.geneontology.org/amigo/term/GO:0010243
hsa-miR-1251-5p	GO:0051246	BP	regulation of protein metabolic process	Gene Ontology	11	390	5.11099e-05	0.0026374	1054|11065|161582|6815|10492|23367|5510|2261|2537|57216|7532	http://amigo.geneontology.org/amigo/term/GO:0051246
hsa-miR-1251-5p	GO:0012505	CC	endomembrane system	Gene Ontology	14	633	6.62399e-05	0.00325141	55920|130340|9321|990|598|5924|27348|79902|286827|10228|3267|9589|4853|7178	http://amigo.geneontology.org/amigo/term/GO:0012505
hsa-miR-1251-5p	GO:0036211	BP	protein modification process	Gene Ontology	14	643	7.78833e-05	0.00364512	58505|84750|8237|339745|5713|5144|11065|5562|149041|79902|51776|400569|29105|57216	http://amigo.geneontology.org/amigo/term/GO:0036211
hsa-miR-1251-5p	GO:0031326	BP	regulation of cellular biosynthetic process	Gene Ontology	14	652	8.98483e-05	0.00406336	23741|8092|63035|79692|1737|7799|7514|5562|23543|64864|55659|11278|7586|10514	http://amigo.geneontology.org/amigo/term/GO:0031326
hsa-miR-1251-5p	GO:0043227	CC	membrane-bounded organelle	Gene Ontology	28	2030	0.0001016	0.00449386	195828|26953|7011|56929|80119|5984|2119|51776|10269|65109|8732|1316|92285|84450|5142|54542|9212|203228|58505|4666|5713|58508|84807|2571|7586|3843|79692|10492	http://amigo.geneontology.org/amigo/term/GO:0043227
hsa-miR-1251-5p	GO:0005657	CC	replication fork	Gene Ontology	3	12	0.000104204	0.00450989	5982|80119|5984	http://amigo.geneontology.org/amigo/term/GO:0005657
hsa-miR-1251-5p	GO:0006139	BP	nucleobase-containing compound metabolic process	Gene Ontology	17	933	0.000115513	0.00486064	7586|7562|5167|4088|4751|79692|7071|5984|51340|79902|9212|6670|6240|23019|7552|6173|29896	http://amigo.geneontology.org/amigo/term/GO:0006139
hsa-miR-1251-5p	GO:0042886	BP	amide transport	Gene Ontology	9	288	0.000117138	0.00486064	84750|6659|22841|4666|26953|3843|527|55670|6173	http://amigo.geneontology.org/amigo/term/GO:0042886
hsa-miR-1251-5p	GO:0060255	BP	regulation of macromolecule metabolic process	Gene Ontology	17	957	0.000155182	0.00624609	54014|7799|8092|5982|84450|10212|167153|537|7579|51776|1653|9212|5510|54542|11278|79692|7514	http://amigo.geneontology.org/amigo/term/GO:0060255
hsa-miR-1251-5p	GO:0043228	CC	non-membrane-bounded organelle	Gene Ontology	13	606	0.000161376	0.00636801	55920|29896|11258|4088|4751|55269|3843|84294|80119|88745|598|23019|4204	http://amigo.geneontology.org/amigo/term/GO:0043228
hsa-miR-1251-5p	GO:0006457	BP	protein folding	Gene Ontology	4	41	0.000182289	0.00667013	84750|59345|6000|27348	http://amigo.geneontology.org/amigo/term/GO:0006457
hsa-miR-1251-5p	GO:0031323	BP	regulation of cellular metabolic process	Gene Ontology	17	969	0.000179155	0.00667013	55082|149041|359948|5167|51340|2058|54014|7248|7799|7579|4775|523|65109|4097|2957|7716|57216	http://amigo.geneontology.org/amigo/term/GO:0031323
hsa-miR-1251-5p	GO:0071704	BP	organic substance metabolic process	Gene Ontology	24	1671	0.000181462	0.00667013	90121|6815|9532|79902|195828|4204|7074|1737|6517|9782|56605|64864|140838|7532|158399|152006|9826|5756|7552|23543|6173|359948|4751|4799	http://amigo.geneontology.org/amigo/term/GO:0071704
hsa-miR-1251-5p	GO:0097659	BP	nucleic acid-templated transcription	Gene Ontology	13	612	0.000177239	0.00667013	1316|988|54700|4088|55213|55629|84807|7799|1500|4799|92285|9212|56919	http://amigo.geneontology.org/amigo/term/GO:0097659
hsa-miR-1251-5p	GO:0034654	BP	nucleobase-containing compound biosynthetic process	Gene Ontology	14	714	0.000224867	0.00793938	988|359948|6659|79692|58508|7071|7799|2119|63035|400569|56919|4853|7586|10514	http://amigo.geneontology.org/amigo/term/GO:0034654
hsa-miR-1251-5p	GO:0016788	MF	hydrolase activity, acting on ester bonds	Gene Ontology	6	132	0.000243867	0.00846175	57552|5167|57697|6815|2237|8732	http://amigo.geneontology.org/amigo/term/GO:0016788
hsa-miR-1251-5p	GO:0005654	CC	nucleoplasm	Gene Ontology	11	474	0.000268584	0.00908447	23741|7716|3839|2237|65109|9782|403341|10212|23543|29105|203228	http://amigo.geneontology.org/amigo/term/GO:0005654
hsa-miR-1251-5p	GO:0019538	BP	protein metabolic process	Gene Ontology	16	911	0.000273862	0.00910986	80218|4666|54726|990|7074|4751|2058|84992|52|5924|6670|9512|5510|7248|55744|2537	http://amigo.geneontology.org/amigo/term/GO:0019538
hsa-miR-1251-5p	GO:0014070	BP	response to organic cyclic compound	Gene Ontology	6	136	0.00028443	0.00930756	598|5144|5142|7799|23019|23543	http://amigo.geneontology.org/amigo/term/GO:0014070
hsa-miR-1251-5p	GO:2000278	BP	regulation of DNA biosynthetic process	Gene Ontology	3	18	0.000296255	0.00953941	5982|4751|80119	http://amigo.geneontology.org/amigo/term/GO:2000278
hsa-miR-1251-5p	GO:0019899	MF	enzyme binding	Gene Ontology	9	330	0.000312126	0.0098922	8036|5982|4751|5144|5984|221178|3843|527|2261	http://amigo.geneontology.org/amigo/term/GO:0019899
hsa-miR-1251-5p	GO:0080135	BP	regulation of cellular response to stress	Gene Ontology	5	90	0.000337622	0.0105343	7074|598|79902|51776|7178	http://amigo.geneontology.org/amigo/term/GO:0080135
hsa-miR-1251-5p	GO:0031090	CC	organelle membrane	Gene Ontology	11	493	0.000371299	0.0113355	84750|4170|309|10269|26953|79902|537|8936|7514|9512|9589	http://amigo.geneontology.org/amigo/term/GO:0031090
hsa-miR-1251-5p	GO:0007165	BP	signal transduction	Gene Ontology	16	940	0.000383639	0.0114076	309|988|54700|7078|116028|4775|161582|5142|7071|7074|3708|527|23367|59345|23019|4853	http://amigo.geneontology.org/amigo/term/GO:0007165
hsa-miR-1251-5p	GO:0098805	CC	whole membrane	Gene Ontology	7	204	0.000391119	0.0114076	309|4170|9522|2571|3708|7514|9321	http://amigo.geneontology.org/amigo/term/GO:0098805
hsa-miR-1251-5p	GO:0051252	BP	regulation of RNA metabolic process	Gene Ontology	12	582	0.000406244	0.0116795	55629|1054|4088|55269|5713|7579|9826|10514|359948|55659|4666|4204	http://amigo.geneontology.org/amigo/term/GO:0051252
hsa-miR-1251-5p	GO:0050789	BP	regulation of biological process	Gene Ontology	24	1778	0.000440264	0.01237	988|54700|598|6815|55204|9212|7579|2119|9782|23019|23152|57169|5144|990|84450|5142|10228|6670|23543|9589|6173|4751|7586|537	http://amigo.geneontology.org/amigo/term/GO:0050789
hsa-miR-1251-5p	GO:0043167	MF	ion binding	Gene Ontology	16	962	0.0004905	0.0133396	1316|7078|170960|309|80119|55204|92285|10009|537|27348|9782|286827|403341|523|11278|3097	http://amigo.geneontology.org/amigo/term/GO:0043167
hsa-miR-1251-5p	GO:0003824	MF	catalytic activity	Gene Ontology	18	1162	0.000503504	0.0135107	23741|57552|308|54726|8237|990|23321|10212|5144|57697|11065|5984|79066|27348|9512|2571|140838|2537	http://amigo.geneontology.org/amigo/term/GO:0003824
hsa-miR-1251-5p	GO:0043068	BP	positive regulation of programmed cell death	Gene Ontology	5	104	0.000634239	0.0164698	598|7078|10687|6659|7532	http://amigo.geneontology.org/amigo/term/GO:0043068
hsa-miR-1251-5p	GO:0000070	BP	mitotic sister chromatid segregation	Gene Ontology	3	25	0.000706509	0.0175187	9212|4751|990	http://amigo.geneontology.org/amigo/term/GO:0000070
hsa-miR-1251-5p	GO:2001141	BP	regulation of RNA biosynthetic process	Gene Ontology	12	621	0.000709452	0.0175187	23741|1316|988|55082|92285|79692|57616|79902|7514|400569|7552|9321	http://amigo.geneontology.org/amigo/term/GO:2001141
hsa-miR-1251-5p	GO:0031967	CC	organelle envelope	Gene Ontology	6	165	0.000760445	0.0185502	4088|598|647087|2182|7514|10269	http://amigo.geneontology.org/amigo/term/GO:0031967
hsa-miR-1251-5p	GO:0006006	BP	glucose metabolic process	Gene Ontology	3	26	0.000784402	0.0185719	5230|1737|5562	http://amigo.geneontology.org/amigo/term/GO:0006006
hsa-miR-1251-5p	GO:0016331	BP	morphogenesis of embryonic epithelium	Gene Ontology	3	26	0.000784402	0.0185719	8092|6659|7248	http://amigo.geneontology.org/amigo/term/GO:0016331
hsa-miR-1251-5p	GO:0000976	MF	transcription regulatory region sequence-specific DNA binding	Gene Ontology	5	112	0.000873594	0.019397	7579|7562|55269|11278|6659	http://amigo.geneontology.org/amigo/term/GO:0000976
hsa-miR-1251-5p	GO:0006996	BP	organelle organization	Gene Ontology	11	548	0.000870325	0.019397	308|598|79902|2237|51776|80119|9826|5562|1653|55744|23243	http://amigo.geneontology.org/amigo/term/GO:0006996
hsa-miR-1251-5p	GO:0019438	BP	aromatic compound biosynthetic process	Gene Ontology	13	727	0.000865896	0.019397	988|4216|158399|5982|9212|1500|9826|403341|400569|1653|9321|10514|4799	http://amigo.geneontology.org/amigo/term/GO:0019438
hsa-miR-1251-5p	GO:0080090	BP	regulation of primary metabolic process	Gene Ontology	14	823	0.000886719	0.019397	5167|7074|55213|84450|7716|11065|9212|80119|4775|23367|4799|4751|65109|57216	http://amigo.geneontology.org/amigo/term/GO:0080090
hsa-miR-1251-5p	GO:1903506	BP	regulation of nucleic acid-templated transcription	Gene Ontology	11	549	0.000882966	0.019397	1316|57616|54700|158399|79692|79902|9826|54014|400569|57169|170960	http://amigo.geneontology.org/amigo/term/GO:1903506
hsa-miR-1251-5p	GO:0035639	MF	purine ribonucleoside triphosphate binding	Gene Ontology	8	309	0.000928022	0.0198685	10000|5230|4751|5984|5562|56919|2261|8732	http://amigo.geneontology.org/amigo/term/GO:0035639
hsa-miR-1251-5p	GO:0043169	MF	cation binding	Gene Ontology	12	641	0.000927169	0.0198685	23321|5167|4751|79692|7071|92285|54542|7586|6670|9512|11278|7178	http://amigo.geneontology.org/amigo/term/GO:0043169
hsa-miR-1251-5p	GO:0006796	BP	phosphate-containing compound metabolic process	Gene Ontology	10	468	0.000938842	0.0198886	6792|990|7074|375449|522|9512|5510|140838|4204|7532	http://amigo.geneontology.org/amigo/term/GO:0006796
hsa-miR-1251-5p	GO:0035567	BP	non-canonical Wnt signaling pathway	Gene Ontology	3	28	0.000956082	0.0200429	7074|5713|57216	http://amigo.geneontology.org/amigo/term/GO:0035567
hsa-miR-1251-5p	GO:0016043	BP	cellular component organization	Gene Ontology	15	936	0.00105498	0.0218881	309|79902|51776|5982|55204|7074|2119|1500|203547|10228|5756|10594|55670|55744|7532	http://amigo.geneontology.org/amigo/term/GO:0016043
hsa-miR-1251-5p	GO:0006355	BP	regulation of transcription, DNA-templated	Gene Ontology	11	567	0.00113785	0.0233666	359948|158399|7586|7071|152006|1500|54014|23019|1653|57169|10514	http://amigo.geneontology.org/amigo/term/GO:0006355
hsa-miR-1251-5p	GO:0009892	BP	negative regulation of metabolic process	Gene Ontology	9	402	0.00122412	0.0242714	339745|79902|149041|80119|4799|9212|6173|10514|990	http://amigo.geneontology.org/amigo/term/GO:0009892
hsa-miR-1251-5p	GO:0000819	BP	sister chromatid segregation	Gene Ontology	3	31	0.00125532	0.0245275	55920|4751|11065	http://amigo.geneontology.org/amigo/term/GO:0000819
hsa-miR-1251-5p	GO:0006793	BP	phosphorus metabolic process	Gene Ontology	10	488	0.00127496	0.0246717	8036|5230|5713|6815|1737|7248|537|7074|6240|8732	http://amigo.geneontology.org/amigo/term/GO:0006793
hsa-miR-1251-5p	GO:0019693	BP	ribose phosphate metabolic process	Gene Ontology	4	72	0.00134913	0.025494	5230|5144|522|1737	http://amigo.geneontology.org/amigo/term/GO:0019693
hsa-miR-1251-5p	GO:0033572	BP	transferrin transport	Gene Ontology	2	7	0.00136414	0.025538	537|523	http://amigo.geneontology.org/amigo/term/GO:0033572
hsa-miR-1251-5p	GO:0065007	BP	biological regulation	Gene Ontology	23	1832	0.00149465	0.0275962	55082|54700|9532|79902|56919|10514|1054|8092|523|309|4216|5167|3839|359948|4751|4666|5713|58508|653464|149041|537|203547|55659	http://amigo.geneontology.org/amigo/term/GO:0065007
hsa-miR-1251-5p	GO:0003676	MF	nucleic acid binding	Gene Ontology	10	501	0.00154186	0.028104	7579|6659|7716|116028|79692|7799|4088|3097|10594|55744	http://amigo.geneontology.org/amigo/term/GO:0003676
hsa-miR-1251-5p	GO:0003712	MF	transcription coregulator activity	Gene Ontology	4	75	0.00155707	0.028104	4666|2957|84807|10514	http://amigo.geneontology.org/amigo/term/GO:0003712
hsa-miR-1251-5p	GO:1902679	BP	negative regulation of RNA biosynthetic process	Gene Ontology	6	192	0.00161413	0.028875	4666|7071|10009|23543|11278|10514	http://amigo.geneontology.org/amigo/term/GO:1902679
hsa-miR-1251-5p	GO:0006351	BP	transcription, DNA-templated	Gene Ontology	11	599	0.00173981	0.0295629	57169|359948|158399|6659|7586|7071|4799|54014|9321|10514|170960	http://amigo.geneontology.org/amigo/term/GO:0006351
hsa-miR-1251-5p	GO:0009966	BP	regulation of signal transduction	Gene Ontology	9	424	0.00174807	0.0295629	54700|6659|5167|4088|149041|51776|1500|527|9212	http://amigo.geneontology.org/amigo/term/GO:0009966
hsa-miR-1251-5p	GO:0017016	MF	Ras GTPase binding	Gene Ontology	4	77	0.00170747	0.0295629	55920|7514|9826|7074	http://amigo.geneontology.org/amigo/term/GO:0017016
hsa-miR-1251-5p	GO:2000756	BP	regulation of peptidyl-lysine acetylation	Gene Ontology	2	8	0.00169815	0.0295629	6659|4204	http://amigo.geneontology.org/amigo/term/GO:2000756
hsa-miR-1251-5p	GO:0006259	BP	DNA metabolic process	Gene Ontology	5	137	0.00205986	0.0321217	9212|988|57697|80119|7011	http://amigo.geneontology.org/amigo/term/GO:0006259
hsa-miR-1251-5p	GO:0015931	BP	nucleobase-containing compound transport	Gene Ontology	3	37	0.00201618	0.0321217	65109|7514|7248	http://amigo.geneontology.org/amigo/term/GO:0015931
hsa-miR-1251-5p	GO:0005048	MF	signal sequence binding	Gene Ontology	2	9	0.00206696	0.0321217	3843|26953	http://amigo.geneontology.org/amigo/term/GO:0005048
hsa-miR-1251-5p	GO:0009247	BP	glycolipid biosynthetic process	Gene Ontology	2	9	0.00206696	0.0321217	84992|5562	http://amigo.geneontology.org/amigo/term/GO:0009247
hsa-miR-1251-5p	GO:0046031	BP	ADP metabolic process	Gene Ontology	2	9	0.00206696	0.0321217	5230|5562	http://amigo.geneontology.org/amigo/term/GO:0046031
hsa-miR-1251-5p	GO:0071806	BP	protein transmembrane transport	Gene Ontology	2	9	0.00206696	0.0321217	55670|4170	http://amigo.geneontology.org/amigo/term/GO:0071806
hsa-miR-1251-5p	GO:0033043	BP	regulation of organelle organization	Gene Ontology	6	203	0.00211844	0.0326694	23741|990|4751|7248|80119|598	http://amigo.geneontology.org/amigo/term/GO:0033043
hsa-miR-1251-5p	GO:0065009	BP	regulation of molecular function	Gene Ontology	10	525	0.00215316	0.0327036	7078|7074|5144|5142|7248|221178|80119|9826|2261|2537	http://amigo.geneontology.org/amigo/term/GO:0065009
hsa-miR-1251-5p	GO:0009987	BP	cellular process	Gene Ontology	28	2484	0.00225747	0.033796	54700|10000|7071|9212|79902|403341|54014|9321|170850|116028|9837|5984|6517|522|387104|5144|308|129831|5142|84450|54462|5756|3267|400569|11278|7248|3843|55659	http://amigo.geneontology.org/amigo/term/GO:0009987
hsa-miR-1251-5p	GO:0031098	BP	stress-activated protein kinase signaling cascade	Gene Ontology	3	39	0.00232126	0.033796	7074|51776|57216	http://amigo.geneontology.org/amigo/term/GO:0031098
hsa-miR-1251-5p	GO:0031329	BP	regulation of cellular catabolic process	Gene Ontology	5	141	0.00232427	0.033796	308|598|7078|10492|387104	http://amigo.geneontology.org/amigo/term/GO:0031329
hsa-miR-1251-5p	GO:0034641	BP	cellular nitrogen compound metabolic process	Gene Ontology	15	1017	0.00232584	0.033796	90121|359948|8092|6240|5144|5142|2237|2182|522|54014|65109|1653|55659|10492|10514	http://amigo.geneontology.org/amigo/term/GO:0034641
hsa-miR-1251-5p	GO:0140098	MF	catalytic activity, acting on RNA	Gene Ontology	3	39	0.00232126	0.033796	1653|10247|2058	http://amigo.geneontology.org/amigo/term/GO:0140098
hsa-miR-1251-5p	GO:0051641	BP	cellular localization	Gene Ontology	8	360	0.00236603	0.0341335	51164|6659|11258|7074|6815|6891|3708|9212	http://amigo.geneontology.org/amigo/term/GO:0051641
hsa-miR-1251-5p	GO:0009065	BP	glutamine family amino acid catabolic process	Gene Ontology	2	10	0.00247013	0.0348852	2571|4942	http://amigo.geneontology.org/amigo/term/GO:0009065
hsa-miR-1251-5p	GO:0032507	BP	maintenance of protein location in cell	Gene Ontology	2	10	0.00247013	0.0348852	5756|6659	http://amigo.geneontology.org/amigo/term/GO:0032507
hsa-miR-1251-5p	GO:0005912	CC	adherens junction	Gene Ontology	4	86	0.00251014	0.0350809	1500|527|8936|7532	http://amigo.geneontology.org/amigo/term/GO:0005912
hsa-miR-1251-5p	GO:0008104	BP	protein localization	Gene Ontology	8	367	0.00265494	0.0368487	22841|6815|2119|7514|523|65109|1653|57216	http://amigo.geneontology.org/amigo/term/GO:0008104
hsa-miR-1251-5p	GO:0010467	BP	gene expression	Gene Ontology	13	834	0.00283361	0.0389259	80218|23741|4097|158399|7716|4775|9782|154007|23367|4799|54014|1653|7586	http://amigo.geneontology.org/amigo/term/GO:0010467
hsa-miR-1251-5p	GO:2000573	BP	positive regulation of DNA biosynthetic process	Gene Ontology	2	11	0.00290723	0.0390053	5982|5984	http://amigo.geneontology.org/amigo/term/GO:2000573
hsa-miR-1251-5p	GO:0002292	BP	T cell differentiation involved in immune response	Gene Ontology	2	11	0.00290723	0.0390053	149041|54542	http://amigo.geneontology.org/amigo/term/GO:0002292
hsa-miR-1251-5p	GO:1901292	BP	nucleoside phosphate catabolic process	Gene Ontology	2	11	0.00290723	0.0390053	5142|5167	http://amigo.geneontology.org/amigo/term/GO:1901292
hsa-miR-1251-5p	GO:0008152	BP	metabolic process	Gene Ontology	21	1706	0.00299642	0.0397449	80218|29896|57616|8036|9532|170960|7074|4853|4666|4775|58508|50|100996939|3708|527|3097|598|400569|56919|2261|8732	http://amigo.geneontology.org/amigo/term/GO:0008152
hsa-miR-1251-5p	GO:0031325	BP	positive regulation of cellular metabolic process	Gene Ontology	9	461	0.0030216	0.0397449	1316|4216|663|537|2119|51776|5510|10492|4204	http://amigo.geneontology.org/amigo/term/GO:0031325
hsa-miR-1251-5p	GO:0045184	BP	establishment of protein localization	Gene Ontology	7	295	0.00308125	0.0401361	84750|4163|4666|22841|527|6173|7514	http://amigo.geneontology.org/amigo/term/GO:0045184
hsa-miR-1251-5p	GO:0051020	MF	GTPase binding	Gene Ontology	4	92	0.00316976	0.0409997	537|7514|8936|2261	http://amigo.geneontology.org/amigo/term/GO:0051020
hsa-miR-1251-5p	GO:0036094	MF	small molecule binding	Gene Ontology	9	467	0.00328372	0.0419072	309|129831|4942|5982|2058|11065|5756|9212|10492	http://amigo.geneontology.org/amigo/term/GO:0036094
hsa-miR-1251-5p	GO:0051651	BP	maintenance of location in cell	Gene Ontology	2	12	0.00337781	0.042669	5756|6659	http://amigo.geneontology.org/amigo/term/GO:0051651
hsa-miR-1251-5p	GO:0072331	BP	signal transduction by p53 class mediator	Gene Ontology	3	45	0.00340226	0.042669	5982|5984|10514	http://amigo.geneontology.org/amigo/term/GO:0072331
hsa-miR-1251-5p	GO:1901137	BP	carbohydrate derivative biosynthetic process	Gene Ontology	4	96	0.00366973	0.0451703	84750|1737|5562|84992	http://amigo.geneontology.org/amigo/term/GO:1901137
hsa-miR-1251-5p	GO:0010646	BP	regulation of cell communication	Gene Ontology	9	478	0.00381055	0.0463368	4170|6659|5167|7074|9909|5924|221178|9826|3799	http://amigo.geneontology.org/amigo/term/GO:0010646
hsa-miR-1251-5p	GO:0045778	BP	positive regulation of ossification	Gene Ontology	2	13	0.00388144	0.0464964	537|4088	http://amigo.geneontology.org/amigo/term/GO:0045778
hsa-miR-1251-5p	GO:0060996	BP	dendritic spine development	Gene Ontology	2	13	0.00388144	0.0464964	2182|653464	http://amigo.geneontology.org/amigo/term/GO:0060996
hsa-miR-1251-5p	GO:0006396	BP	RNA processing	Gene Ontology	5	161	0.00402858	0.0472274	65109|51340|154007|29896|10212	http://amigo.geneontology.org/amigo/term/GO:0006396
hsa-miR-1251-5p	GO:0006401	BP	RNA catabolic process	Gene Ontology	3	48	0.0040405	0.0472274	55629|7514|6173	http://amigo.geneontology.org/amigo/term/GO:0006401
hsa-miR-1251-5p	GO:0009891	BP	positive regulation of biosynthetic process	Gene Ontology	7	311	0.00408326	0.0472274	8092|6659|4088|4751|5984|23367|65109	http://amigo.geneontology.org/amigo/term/GO:0009891
hsa-miR-1251-5p	GO:0010468	BP	regulation of gene expression	Gene Ontology	11	671	0.00406305	0.0472274	54700|6659|10009|7248|79902|4216|10212|9589|11278|10247|4204	http://amigo.geneontology.org/amigo/term/GO:0010468
hsa-miR-1251-5p	GO:0031327	BP	negative regulation of cellular biosynthetic process	Gene Ontology	6	232	0.00401634	0.0472274	4775|5167|55269|149041|7514|9212	http://amigo.geneontology.org/amigo/term/GO:0031327
hsa-miR-1251-5p	GO:0006950	BP	response to stress	Gene Ontology	10	578	0.00419899	0.0482884	1316|4216|4170|6659|51340|5713|5984|79902|4775|4097	http://amigo.geneontology.org/amigo/term/GO:0006950
hsa-miR-1251-5p	GO:0055085	BP	transmembrane transport	Gene Ontology	6	235	0.00426721	0.0487941	170850|5167|5144|79902|3708|8645	http://amigo.geneontology.org/amigo/term/GO:0055085
hsa-miR-1251-5p	GO:0000777	CC	condensed chromosome kinetochore	Gene Ontology	2	14	0.0044177	0.0498074	4751|79902	http://amigo.geneontology.org/amigo/term/GO:0000777
hsa-miR-1251-5p	GO:0003677	MF	DNA binding	Gene Ontology	8	401	0.00447145	0.0499379	1054|7579|4751|84450|58508|80119|1653|4204	http://amigo.geneontology.org/amigo/term/GO:0003677
hsa-miR-1251-5p	GO:0006913	BP	nucleocytoplasmic transport	Gene Ontology	3	50	0.00450371	0.0499379	79902|26953|10514	http://amigo.geneontology.org/amigo/term/GO:0006913
hsa-miR-1301-3p	GO:0005488	MF	binding	Gene Ontology	107	2247	2.16685e-16	1.8968e-13	3920|23208|57688|8621|55610|100996928|11051|6721|92797|10445|4782|3550|3795|160760|10664|285550|54502|403|25820|79707|50640|1462|1159|10725|10282|57120|57448|11273|10116|9701|9175|51444|56910|164832|3843|192670|1998|5393|1123|23308|22995|246175|526|51755|7534|7525|11215|9312|10425|84967|84124|79813|3093|23060|8812|4952|140809|55719|627|7799|25782|23405|10253|10797|9326|137886|27242|84955|8658|726…	http://amigo.geneontology.org/amigo/term/GO:0005488
hsa-miR-1301-3p	GO:0070013	CC	intracellular organelle lumen	Gene Ontology	54	712	5.03532e-16	3.52623e-13	4303|56998|2475|5707|3614|1997|6498|64412|64282|9652|220988|10797|4782|55839|57492|2308|27101|3550|81609|2224|55299|342371|2821|55599|51755|79707|23243|7750|10526|58486|2296|5530|7025|22828|38|55689|9044|3320|4176|389421|10114|4154|81611|4528|84101|6396|79871|9801|4520|23064|2146|10771|55656|254048	http://amigo.geneontology.org/amigo/term/GO:0070013
hsa-miR-1301-3p	GO:0044237	BP	cellular metabolic process	Gene Ontology	87	1718	7.23421e-15	3.89701e-12	3320|51719|339287|8867|55119|9689|8658|283464|27161|545|25942|56623|116154|55827|10114|51444|5999|51379|10613|80139|824|55585|84449|64769|166929|10236|2821|10125|6908|493856|51366|3572|9462|80351|26019|308|10333|58486|10138|84962|84124|5814|3795|54532|54822|3613|57862|56919|131405|1983|7091|153830|7514|23395|54505|26036|5861|7353|4603|11236|4176|389421|149041|51729|84062|6198|6218|6498|4763|5525|…	http://amigo.geneontology.org/amigo/term/GO:0044237
hsa-miR-1301-3p	GO:0005515	MF	protein binding	Gene Ontology	85	1688	2.05382e-14	9.58861e-12	5393|91947|2475|64769|1499|55719|100302652|65056|1778|483|84105|6721|55125|152273|3064|6925|55608|10592|493856|25844|5629|3795|9833|51616|5455|56998|6009|4001|526|55233|403|9406|25820|23019|200081|6228|22820|29035|3181|308|10526|1139|58487|55835|3977|2624|23786|10725|84984|26953|63973|2296|51528|7046|23411|10116|3703|10569|51444|55689|9749|134957|11113|8085|7443|55656|84101|7112|2339|25896|55127|…	http://amigo.geneontology.org/amigo/term/GO:0005515
hsa-miR-1301-3p	GO:0009987	BP	cellular process	Gene Ontology	108	2484	5.04302e-14	2.07743e-11	90120|665|130507|55187|55692|9774|246175|8867|9833|55299|160760|6009|25820|56257|64710|144100|11275|7046|116150|5756|10445|9175|11278|27072|7443|22846|3843|80139|84230|54921|64769|23308|10125|6908|80207|3572|200081|26019|308|10330|58487|84515|3815|10138|204962|1937|7025|4354|8697|9394|84124|5245|79813|55125|23061|7264|4952|54822|64343|2290|81562|9326|84950|124936|7265|26985|51133|1213|9331|23524|…	http://amigo.geneontology.org/amigo/term/GO:0009987
hsa-miR-1301-3p	GO:0043226	CC	organelle	Gene Ontology	96	2086	6.56528e-14	2.41982e-11	11051|6721|79903|9774|9776|3652|85465|160760|54502|403|25942|284309|64710|10526|56623|9373|57120|11275|7046|148479|11273|9701|80034|89781|84230|7525|57602|1660|4899|220988|1329|166929|394|80207|6788|256643|55740|55030|587|55723|5324|10787|79174|4354|23786|81611|440270|149420|5978|57509|7514|55719|79572|65056|10418|7798|81562|6925|56919|23086|23243|51020|5707|26136|9972|23019|2117|1213|55278|10311…	http://amigo.geneontology.org/amigo/term/GO:0043226
hsa-miR-1301-3p	GO:0019222	BP	regulation of metabolic process	Gene Ontology	59	974	2.25452e-13	7.51829e-11	53373|4899|10658|1213|5018|55719|142679|10009|9093|7799|25782|6721|9031|23185|3064|51499|9776|9326|2821|5784|1831|1717|5629|1500|51719|5985|4154|57223|2296|9972|26036|9044|26019|10333|10725|163087|65056|493856|57602|9212|7071|51444|23560|5329|51231|84124|51379|57721|22847|140609|3093|5795|285671|1998|84062|54921|54927|51317|388566	http://amigo.geneontology.org/amigo/term/GO:0019222
hsa-miR-1301-3p	GO:0050789	BP	regulation of biological process	Gene Ontology	85	1778	3.05462e-13	9.30067e-11	5393|90637|79871|627|285381|5985|65986|100302652|57448|9093|56910|1937|2192|55125|5525|10605|10253|4520|490|2821|9444|6908|57492|24144|1831|1983|23086|2059|81609|11113|4289|63973|11073|51000|168850|323|55179|10906|54918|29915|23019|1033|152485|3572|1139|440193|9355|56623|11273|9462|163087|55723|1871|56257|200734|65056|11215|9212|10445|8216|483|4603|10425|80034|8085|10204|57486|51379|2339|862|2589…	http://amigo.geneontology.org/amigo/term/GO:0050789
hsa-miR-1301-3p	GO:0060255	BP	regulation of macromolecule metabolic process	Gene Ontology	58	957	3.56103e-13	9.97516e-11	2734|84449|4899|64769|1871|54880|65056|84105|7799|9645|6721|9212|92797|9879|6925|9774|7699|6908|51366|4999|5451|342371|4603|10664|7514|27161|9972|25820|29915|6198|25942|51616|7750|2117|1139|9448|54206|200734|23411|10116|11278|84101|10425|51231|79813|4763|140609|4520|10613|80139|6788|84062|1386|1660|5814|51317|2534|4850	http://amigo.geneontology.org/amigo/term/GO:0060255
hsa-miR-1301-3p	GO:0006807	BP	nitrogen compound metabolic process	Gene Ontology	76	1541	1.46741e-12	3.6701e-10	84640|3614|85460|1462|8745|9655|9774|9031|64412|60468|3320|22875|4763|6535|5525|11275|9181|10075|10253|9057|51366|80314|7203|2058|25782|5455|115123|246175|10664|55749|253558|54502|55313|3181|83990|9955|1033|25942|57161|55149|55660|2650|142|84515|3815|55726|51729|4331|51528|56257|5530|387|152485|2296|8085|84967|8658|79072|905|57721|57486|3221|2192|27087|55119|5978|22828|6788|8731|824|23013|80351|6…	http://amigo.geneontology.org/amigo/term/GO:0006807
hsa-miR-1301-3p	GO:0006725	BP	cellular aromatic compound metabolic process	Gene Ontology	55	913	1.85804e-12	4.31958e-10	84449|50484|51692|8621|64412|8216|112495|11051|65986|6925|56919|10797|4782|6908|9689|8812|51366|5451|8731|10664|323|1500|55599|83990|6228|25942|8732|7699|55660|10075|5165|9355|10725|9444|7799|5530|7025|9175|5515|9044|7336|389421|84962|4154|51379|1998|79876|84105|149041|10771|285671|6788|1386|51202|51317	http://amigo.geneontology.org/amigo/term/GO:0006725
hsa-miR-1301-3p	GO:0008152	BP	metabolic process	Gene Ontology	80	1706	4.08953e-12	8.18256e-10	140809|2595|84640|84541|50484|2650|56919|8621|23020|100996928|22875|4763|166929|55692|5525|9181|6925|2534|3069|4836|2098|55300|84950|54921|3093|7203|9031|60468|51000|10664|285550|526|10771|55313|23395|9955|10768|9469|57161|116150|10333|284114|2192|9448|55627|9373|545|10138|55603|64772|116154|28977|5530|23411|824|6480|23438|5999|4603|23236|7336|54807|84124|8732|22847|389421|50|23405|4520|23064|259…	http://amigo.geneontology.org/amigo/term/GO:0008152
hsa-miR-1301-3p	GO:0043231	CC	intracellular membrane-bounded organelle	Gene Ontology	77	1606	3.86062e-12	8.18256e-10	56998|3920|9469|1213|65264|23064|11273|23325|3320|7798|90861|9657|3703|6925|56919|10797|10125|3841|24144|1831|8888|27101|55635|85460|4001|3106|10890|9810|60468|3344|23560|10664|8658|57223|55599|8674|23022|5861|84307|2117|55847|285381|54206|23054|9444|10282|7443|4190|3239|9767|7025|22828|10116|79070|23190|9694|8473|9652|4176|10963|79072|5245|7163|5080|79871|9776|25917|10613|3988|8812|3224|28977|79…	http://amigo.geneontology.org/amigo/term/GO:0043231
hsa-miR-1301-3p	GO:0043229	CC	intracellular organelle	Gene Ontology	84	1863	7.80757e-12	1.47774e-09	5393|130340|55520|55299|10658|342371|2650|92797|10009|55610|9093|84984|23347|273|10236|1871|824|440270|9493|2820|2308|57602|25844|285550|9833|3106|64769|60468|3344|51000|5784|8658|283464|54505|9110|26052|9053|6228|152485|284309|284114|5160|10330|9444|1159|22847|51729|10725|23054|10313|10138|323|10390|11275|4774|23190|64412|7025|11215|55689|8473|10425|9657|84967|55125|3643|1997|4154|6009|25994|258…	http://amigo.geneontology.org/amigo/term/GO:0043229
hsa-miR-1301-3p	GO:0005654	CC	nucleoplasm	Gene Ontology	37	474	1.02472e-11	1.84003e-09	5393|25896|3320|1871|10664|27101|3550|81609|5784|57223|23064|3181|51755|51616|7750|55660|57553|23524|84967|3839|116154|11073|7353|11273|1499|9044|112495|4176|84124|1998|79871|140609|149420|55656|8812|79813|4999	http://amigo.geneontology.org/amigo/term/GO:0005654
hsa-miR-1301-3p	GO:0034645	BP	cellular macromolecule biosynthetic process	Gene Ontology	49	789	1.14302e-11	1.95234e-09	5515|9125|64769|84967|8621|64282|6721|9181|56919|131405|57492|1982|7091|6788|3239|342371|246175|9689|27087|4848|3181|10605|80351|7699|1462|55278|3815|23054|23395|55723|2296|1937|8888|3643|23560|8085|54807|5245|51317|22847|25896|23064|5978|8812|7525|1478|51141|6198|4999	http://amigo.geneontology.org/amigo/term/GO:0034645
hsa-miR-1301-3p	GO:0071704	BP	organic substance metabolic process	Gene Ontology	77	1671	2.36933e-11	3.85871e-09	140838|84640|6480|5324|23013|1871|130507|8621|64412|60468|11051|6721|23405|10455|9181|4782|6908|57492|51631|2526|9355|9929|80207|9810|85465|246175|80314|253558|27161|9972|10295|55656|6228|9057|5861|51202|54996|152485|57551|23524|2624|51616|55603|51141|152006|23252|4774|5530|1937|5756|9469|3667|79070|10569|26019|134957|79871|7336|9394|84962|79072|84124|4528|3224|9937|55827|473|10613|5793|55149|579…	http://amigo.geneontology.org/amigo/term/GO:0071704
hsa-miR-1301-3p	GO:0005737	CC	cytoplasm	Gene Ontology	76	1641	2.57744e-11	3.92387e-09	2475|64343|7037|118429|130507|10009|55610|84105|9652|10477|23405|10445|9331|51479|23446|2098|10125|11113|9053|1982|5629|8195|80207|6788|51265|10890|80777|58477|6009|2821|285550|123879|55233|3181|29914|81562|23259|26019|57551|115123|144100|83990|55726|11273|202333|10282|55327|4952|9741|11215|3703|9175|23683|10330|90637|51366|10963|2665|57486|51379|1998|6396|55125|4836|3093|9689|440193|3988|11278|2…	http://amigo.geneontology.org/amigo/term/GO:0005737
hsa-miR-1301-3p	GO:0005634	CC	nucleus	Gene Ontology	61	1182	4.9045e-11	7.00943e-09	55719|699|50484|143686|9093|55692|57862|10445|490|4782|6908|55635|5587|25844|84955|80314|23446|5707|23013|137886|65264|1500|26136|54505|29915|1033|85365|8731|58487|23054|26953|63973|25917|5530|9767|22828|9212|1499|8697|11278|10425|8085|23786|1997|81611|905|5245|55656|7275|84105|9801|9887|2146|51729|80139|7534|23022|64710|283377|7552|4999	http://amigo.geneontology.org/amigo/term/GO:0005634
hsa-miR-1301-3p	GO:0045935	BP	positive regulation of nucleobase-containing compound metabolic process	Gene Ontology	26	257	7.71754e-11	1.05972e-08	4899|10274|55719|607|56919|5629|80314|7203|11278|10664|8658|7552|10138|5530|1499|3643|7528|23236|8085|57721|84105|23064|7046|8812|7182|51141	http://amigo.geneontology.org/amigo/term/GO:0045935
hsa-miR-1301-3p	GO:0043227	CC	membrane-bounded organelle	Gene Ontology	86	2030	8.98662e-11	1.18742e-08	10061|10295|57448|55692|339287|23446|5587|2526|3550|10890|526|4709|57223|27161|545|79707|7699|1462|55627|152485|200894|10613|54927|5393|51692|5768|7037|10120|830|8888|3843|55749|253558|29915|7534|65003|8732|55030|3815|23411|23259|81611|5080|5978|23060|9125|54880|8216|9031|9879|51631|7091|26985|80777|27087|23013|22820|9583|54807|4528|25917|5793|5814|1778|22887|6218|53373|607|29883|143686|6498|5570…	http://amigo.geneontology.org/amigo/term/GO:0043227
hsa-miR-1301-3p	GO:0080090	BP	regulation of primary metabolic process	Gene Ontology	48	823	1.39756e-10	1.77948e-08	4303|285381|54880|10330|64412|5525|23185|7699|131405|1831|1717|5629|7203|9326|60468|5985|55749|25820|80351|7534|25778|152485|7750|5160|10333|84458|9355|10725|2296|200734|5530|9212|51444|8473|5329|80034|54807|4154|905|51379|79813|4520|23064|5978|1386|51141|22887|92797	http://amigo.geneontology.org/amigo/term/GO:0080090
hsa-miR-1301-3p	GO:0005622	CC	intracellular	Gene Ontology	91	2228	1.48448e-10	1.79485e-08	23208|9833|11113|160760|10664|54502|545|79707|1315|3839|9825|5756|10445|9175|51444|5515|10963|8878|79871|23683|10592|2146|10613|80139|7525|85458|140809|55327|64282|65986|606495|200081|26019|84515|51020|10138|79070|1937|7025|11215|4354|84967|4810|84124|55635|1660|26225|25896|2290|65056|56919|10797|137886|6166|51631|123879|1500|26136|7552|5861|114088|1213|54940|9093|11236|23236|4170|1998|862|4836|8…	http://amigo.geneontology.org/amigo/term/GO:0005622
hsa-miR-1301-3p	GO:0031981	CC	nuclear lumen	Gene Ontology	40	603	1.51215e-10	1.79485e-08	56998|4899|10658|6498|10472|10009|64282|51692|4763|10236|23185|9879|24144|22995|5708|55749|154007|9972|51616|607|58486|23524|55726|4853|8621|5530|148479|10725|10114|55689|1478|39|4170|79813|5080|23347|55127|7528|5814|51317	http://amigo.geneontology.org/amigo/term/GO:0031981
hsa-miR-1301-3p	GO:0012505	CC	endomembrane system	Gene Ontology	41	633	1.74606e-10	2.00453e-08	130340|3920|665|23325|64412|10384|10236|152273|23086|137886|10857|84950|124936|10890|6009|8658|526|29914|26052|85365|116150|10333|9331|10282|163087|57120|10390|23250|390|9743|23259|8473|23236|10963|3841|273|7525|84062|9694|29803|4853	http://amigo.geneontology.org/amigo/term/GO:0012505
hsa-miR-1301-3p	GO:0043233	CC	organelle lumen	Gene Ontology	44	725	2.59847e-10	2.88843e-08	4303|607|10274|8621|64412|23347|9031|10455|10472|55839|57492|51631|5708|7091|5451|2224|5784|154007|51499|83990|545|7534|8732|55030|55660|5165|2624|84967|10725|2296|5530|9767|7025|10445|8697|8473|7336|39|1998|23683|51729|79813|1386|1660	http://amigo.geneontology.org/amigo/term/GO:0043233
hsa-miR-1301-3p	GO:0044271	BP	cellular nitrogen compound biosynthetic process	Gene Ontology	47	813	2.86963e-10	3.0917e-08	5515|84449|4899|10658|6498|7799|23405|10236|23185|6166|57492|5587|80314|5451|25942|246175|5784|8658|23013|51755|545|65003|84307|8731|5160|5165|23054|7525|57157|2959|4354|10445|9175|55689|8473|80034|389421|1997|4528|51379|55635|5245|285550|55149|28977|4853|6218	http://amigo.geneontology.org/amigo/term/GO:0044271
hsa-miR-1301-3p	GO:0044238	BP	primary metabolic process	Gene Ontology	71	1578	4.02724e-10	4.20937e-08	55719|9125|253832|65264|9879|130507|84668|8216|166929|11275|9655|3572|23446|6166|205564|140838|55119|9833|51265|60468|160760|246175|168850|5999|55313|84105|51755|10605|89910|50640|6908|9469|85365|55660|3643|10725|9373|9462|4190|65056|23252|200734|5128|387|4354|8697|55689|23560|3181|5329|80034|54800|142679|1997|204962|2339|22847|57486|3221|79871|140609|149420|11073|5978|9972|8878|28977|1937|51317|…	http://amigo.geneontology.org/amigo/term/GO:0044238
hsa-miR-1301-3p	GO:0048519	BP	negative regulation of biological process	Gene Ontology	45	777	6.55842e-10	6.56123e-08	4303|5393|7046|29883|627|5018|143686|84458|9093|23405|10472|2308|27242|1831|5708|8195|3106|7071|23208|53373|7514|2475|29915|23019|8650|26019|308|285381|57551|55835|10138|2296|5530|23411|7025|9212|4170|1997|79813|4179|80381|9887|2146|5978|8837	http://amigo.geneontology.org/amigo/term/GO:0048519
hsa-miR-1301-3p	GO:0010629	BP	negative regulation of gene expression	Gene Ontology	27	309	6.76838e-10	6.58319e-08	56998|29883|10658|54880|9093|23405|10236|10472|5451|9810|342371|3181|6228|51616|26019|84458|142|2624|8204|5324|5515|8085|57721|5080|80153|4179|4999	http://amigo.geneontology.org/amigo/term/GO:0010629
hsa-miR-1301-3p	GO:0031323	BP	regulation of cellular metabolic process	Gene Ontology	51	969	1.06718e-09	9.96457e-08	5393|152559|4899|9125|149041|2290|7799|25782|4763|92797|9655|5985|57492|55704|1831|2058|5455|246175|5784|285550|10605|56257|200081|25942|84307|58486|2192|9444|10138|55127|5324|7025|9645|1499|51444|4603|80034|149371|4176|51231|51379|2339|5080|6721|80381|10771|55023|79813|1386|6198|22887	http://amigo.geneontology.org/amigo/term/GO:0031323
hsa-miR-1301-3p	GO:0034641	BP	cellular nitrogen compound metabolic process	Gene Ontology	52	1017	1.86294e-09	1.6943e-07	9125|2290|2296|64282|51692|6721|7336|84967|55127|23524|57492|51631|84950|1982|9355|7091|55119|5515|342371|9689|54502|3181|10605|56257|7750|58487|7525|5165|84515|3815|23054|23395|55627|163087|55723|10560|1937|10445|23438|3643|8085|79876|140609|7699|23064|8812|11073|28977|51317|22847|22887|4999	http://amigo.geneontology.org/amigo/term/GO:0034641
hsa-miR-1301-3p	GO:0016043	BP	cellular component organization	Gene Ontology	49	936	2.69415e-09	2.35839e-07	5393|214|29883|23510|4899|100996928|56910|11051|2192|55835|92797|152273|8867|24144|3643|51000|1500|27161|5921|8674|55740|25942|55660|144100|2624|5587|55726|55723|5530|10787|148479|387|23259|55689|84101|10425|7443|8992|8878|5515|1456|203547|55023|2339|84062|55142|4580|23141|5756	http://amigo.geneontology.org/amigo/term/GO:0016043
hsa-miR-1301-3p	GO:0010556	BP	regulation of macromolecule biosynthetic process	Gene Ontology	38	623	3.84737e-09	3.28575e-07	4303|64769|9093|57862|55127|131405|5245|57492|1831|1983|9326|60468|5784|323|23013|3181|29915|6198|51499|10333|84458|9355|1937|6950|7071|9175|7528|11236|80034|51379|79813|4520|473|1998|1386|64710|5814|9925	http://amigo.geneontology.org/amigo/term/GO:0010556
hsa-miR-1301-3p	GO:0000976	MF	transcription regulatory region sequence-specific DNA binding	Gene Ontology	16	112	4.24798e-09	3.5415e-07	3239|2624|5324|51317|5080|6721|63973|23064|10725|4774|5978|23411|6498|1386|11278|4603	http://amigo.geneontology.org/amigo/term/GO:0000976
hsa-miR-1301-3p	GO:0065009	BP	regulation of molecular function	Gene Ontology	34	525	6.37848e-09	5.19401e-07	152559|627|5018|440590|1139|9093|3320|9031|5525|9181|10253|10125|24144|5515|51719|54918|9462|200081|3667|58487|54206|9373|4331|9743|6950|9175|483|8473|54800|51231|55125|285671|4952|1386	http://amigo.geneontology.org/amigo/term/GO:0065009
hsa-miR-1301-3p	GO:0019219	BP	regulation of nucleobase-containing compound metabolic process	Gene Ontology	37	608	6.53442e-09	5.20006e-07	84449|29883|10658|64769|8621|6721|23405|1499|2308|5707|9810|23013|10664|323|1500|23019|7534|7750|5165|3815|8204|163087|10009|5324|65056|6950|10445|5515|54807|3224|862|3221|23064|9689|1386|55023|4999	http://amigo.geneontology.org/amigo/term/GO:0019219
hsa-miR-1301-3p	GO:0048523	BP	negative regulation of cellular process	Gene Ontology	41	723	6.70449e-09	5.21684e-07	4303|23208|2290|10009|64412|55125|4763|5587|6480|2308|51366|5629|5707|60468|3572|55179|2296|5921|1982|26052|8650|51616|51499|1213|3667|9448|8204|6498|7071|10114|5999|8473|84962|142679|85458|25896|8812|3224|51141|54927|55023	http://amigo.geneontology.org/amigo/term/GO:0048523
hsa-miR-1301-3p	GO:0016070	BP	RNA metabolic process	Gene Ontology	41	738	1.15654e-08	8.80351e-07	56998|4899|29883|2290|10732|2475|10274|10236|9326|6908|57492|2308|5708|10664|8658|7514|4848|10605|6228|8732|7750|55660|142|23524|5587|10725|23054|10138|6498|389421|9645|5515|54807|84962|905|127253|862|4520|2146|9031|23405	http://amigo.geneontology.org/amigo/term/GO:0016070
hsa-miR-1301-3p	GO:0006355	BP	regulation of transcription, DNA-templated	Gene Ontology	35	567	1.19798e-08	8.91922e-07	4303|10274|2296|1871|8621|64412|7071|57862|65986|5455|3344|246175|1500|4848|51499|56257|51616|7699|284309|58486|142|6498|152006|23019|7025|1499|10114|3643|80034|84124|905|5245|8878|84307|8812	http://amigo.geneontology.org/amigo/term/GO:0006355
hsa-miR-1301-3p	GO:0044249	BP	cellular biosynthetic process	Gene Ontology	49	984	1.22545e-08	8.91922e-07	10274|587|8621|7799|166929|57862|85460|10797|24144|2526|8888|7203|6788|85465|55704|285550|3181|56623|80351|55656|6228|25942|84307|2117|285381|84458|9355|9110|55723|63973|1831|1499|23438|4603|11236|9394|84124|4528|25896|80381|473|7046|80139|7264|23405|1386|64710|6198|6218	http://amigo.geneontology.org/amigo/term/GO:0044249
hsa-miR-1301-3p	GO:0019900	MF	kinase binding	Gene Ontology	15	105	1.29122e-08	9.13373e-07	1213|3667|142679|7534|905|2339|2475|51719|23411|5525|9655|9043|1499|1386|8812	http://amigo.geneontology.org/amigo/term/GO:0019900
hsa-miR-1301-3p	GO:0097159	MF	organic cyclic compound binding	Gene Ontology	44	845	2.04653e-08	1.37806e-06	2475|29883|64282|7799|10477|90120|55692|92797|9774|55278|55127|10857|8867|149041|11073|11113|5455|3344|55749|403|26052|5861|7699|284309|57553|57551|1159|5165|9448|4603|5329|8085|862|6721|23683|149420|57519|23020|28976|7528|55585|9925|388566|1660	http://amigo.geneontology.org/amigo/term/GO:0097159
hsa-miR-1301-3p	GO:0044260	BP	cellular macromolecule metabolic process	Gene Ontology	57	1269	2.47539e-08	1.63539e-06	7514|2475|57862|50484|130507|10418|9043|23405|10236|339287|56919|10253|149041|9326|168850|24144|5629|3181|3239|5784|5978|9406|29915|56257|6228|10425|9469|7750|1462|1213|10330|9331|9355|23054|153830|4331|116154|55827|5530|7025|9212|10114|23438|5515|4603|5329|79871|55127|23064|440193|80139|8812|28977|54532|26019|55023|4999	http://amigo.geneontology.org/amigo/term/GO:0044260
hsa-miR-1301-3p	GO:0009058	BP	biosynthetic process	Gene Ontology	47	952	3.1279e-08	1.9734e-06	3614|9125|253832|2290|2296|64412|64282|7799|9031|51430|23185|131405|23259|57492|5587|1982|7203|5451|5455|342371|246175|55704|3181|10605|1462|58486|5165|23054|55627|55723|4190|4331|23411|10114|23438|54921|8473|8085|9394|862|9689|80139|6788|60468|1386|2117|6480	http://amigo.geneontology.org/amigo/term/GO:0009058
hsa-miR-1301-3p	GO:0043232	CC	intracellular non-membrane-bounded organelle	Gene Ontology	34	569	4.05972e-08	2.51595e-06	10274|824|6396|9181|6950|3064|9493|121512|6908|5357|8867|3550|7203|131405|699|5784|7514|79707|51202|8204|205564|2959|387|9212|1499|5515|27072|84101|5080|80153|6334|4001|57602|6218	http://amigo.geneontology.org/amigo/term/GO:0043232
hsa-miR-1301-3p	GO:0044267	BP	cellular protein metabolic process	Gene Ontology	39	726	6.09496e-08	3.67957e-06	152559|10658|64769|2650|54880|9093|7799|10477|5525|23683|2821|3652|27087|51265|60468|160760|10664|8658|123879|51130|65003|57161|3667|3815|51528|7353|1937|9767|10445|55689|11236|7336|51231|79876|2192|4836|192670|57602|4850	http://amigo.geneontology.org/amigo/term/GO:0044267
hsa-miR-1301-3p	GO:0031974	CC	membrane-enclosed lumen	Gene Ontology	38	697	6.29509e-08	3.73598e-06	23325|64769|65264|10472|9774|2821|24144|22995|55635|699|285550|51729|54812|65003|51616|55660|587|10725|26953|55723|9825|5530|9212|23438|11278|7528|84124|905|84101|6396|25896|4520|473|5978|55656|7182|4853|254048	http://amigo.geneontology.org/amigo/term/GO:0031974
hsa-miR-1301-3p	GO:0010467	BP	gene expression	Gene Ontology	42	834	1.02546e-07	5.88629e-06	4899|9125|64769|65986|10732|65056|9093|9879|92797|9181|6925|9774|1982|55119|5455|154007|55599|83990|7750|55660|55278|23524|10445|163087|55603|7046|22828|1499|5515|11236|54807|127253|389421|23064|51379|5978|80139|2534|55149|8731|51202|22887	http://amigo.geneontology.org/amigo/term/GO:0010467
hsa-miR-1301-3p	GO:1901564	BP	organonitrogen compound metabolic process	Gene Ontology	48	1027	1.06956e-07	6.04044e-06	84640|65264|115123|2296|10477|51719|4836|23446|6166|5784|2526|5708|5629|11113|123879|160760|10664|10295|253558|51130|51755|23395|23035|65003|1462|142|2624|3815|9110|9444|153830|9583|10560|9767|23560|223082|90637|23786|57486|5245|2339|25897|9801|80381|1456|7525|57602|55023	http://amigo.geneontology.org/amigo/term/GO:1901564
hsa-miR-1301-3p	GO:0051171	BP	regulation of nitrogen compound metabolic process	Gene Ontology	44	900	1.12357e-07	6.24474e-06	4303|84449|607|9125|64769|6498|1139|7071|10236|7699|9326|2821|10658|2308|1982|5455|246175|168850|285550|123879|57161|51499|7552|7750|57551|58487|9448|10725|4331|2959|6950|11278|23560|389421|4154|4528|3224|5080|25897|80381|3093|285671|8837|55023	http://amigo.geneontology.org/amigo/term/GO:0051171
hsa-miR-1301-3p	GO:0043170	BP	macromolecule metabolic process	Gene Ontology	60	1440	1.29437e-07	7.08163e-06	4303|3920|665|2650|54880|2475|64412|64282|112495|11051|9212|92797|6925|6908|8888|7091|85460|51265|25782|7071|205564|55749|51130|79707|152485|8732|7750|64710|9937|285381|3667|2290|2624|9448|10725|116154|23252|5128|387|9043|9093|23190|11236|10425|80034|54807|79072|11275|57721|862|473|80139|192670|7525|116150|7528|55585|4853|9925|23141	http://amigo.geneontology.org/amigo/term/GO:0043170
hsa-miR-1301-3p	GO:0003676	MF	nucleic acid binding	Gene Ontology	30	501	2.42786e-07	1.25943e-05	2475|220988|1871|10732|7799|55692|65986|3069|1982|5629|168850|55749|23013|9406|10605|25942|8731|84458|84515|9444|23411|4176|389421|1997|25917|10771|192670|1937|2117|5814	http://amigo.geneontology.org/amigo/term/GO:0003676
hsa-miR-1301-3p	GO:1903508	BP	positive regulation of nucleic acid-templated transcription	Gene Ontology	20	244	2.82501e-07	1.43359e-05	4303|8085|607|57492|905|23054|5080|7552|84105|10664|473|7046|23411|5587|1998|1499|7528|51141|4603|64710	http://amigo.geneontology.org/amigo/term/GO:1903508
hsa-miR-1301-3p	GO:0006139	BP	nucleobase-containing compound metabolic process	Gene Ontology	44	933	2.89153e-07	1.44638e-05	55719|9125|152485|9879|9093|9031|55692|57862|9181|4782|6908|51631|24144|5708|7071|10771|5921|23019|7552|26036|9044|9937|7750|9406|84458|10075|5587|10725|23054|9444|7353|7046|7025|9212|10445|23236|80034|1997|3224|5080|5978|8731|9925|22887	http://amigo.geneontology.org/amigo/term/GO:0006139
hsa-miR-1301-3p	GO:0034654	BP	nucleobase-containing compound biosynthetic process	Gene Ontology	37	714	3.0686e-07	1.51334e-05	84449|64769|8216|51692|92797|10472|56919|246175|2308|1831|2624|7071|51000|8658|253558|27161|29915|26036|9355|545|7799|9583|4774|2959|7025|5814|55689|8085|8878|22847|55127|2146|80139|7182|51141|4853|57862	http://amigo.geneontology.org/amigo/term/GO:0034654
hsa-miR-1301-3p	GO:0016071	BP	mRNA metabolic process	Gene Ontology	14	118	3.13672e-07	1.52545e-05	5393|10114|9444|80153|8621|55692|9406|27161|92797|55149|10768|1478|10569|4850	http://amigo.geneontology.org/amigo/term/GO:0016071
hsa-miR-1301-3p	GO:0006351	BP	transcription, DNA-templated	Gene Ontology	33	599	3.70621e-07	1.77771e-05	4303|9125|2296|8621|64412|5455|112495|57862|1871|6925|5587|5629|7071|3344|246175|323|4848|83990|51616|142|3815|55726|163087|6498|7025|3643|80034|389421|84124|8878|8812|3224|1478	http://amigo.geneontology.org/amigo/term/GO:0006351
hsa-miR-1301-3p	GO:0006396	BP	RNA processing	Gene Ontology	16	161	4.17249e-07	1.96107e-05	51631|24144|10658|154007|84967|57721|55149|55520|64282|23064|23013|23405|27161|9877|79707|51202	http://amigo.geneontology.org/amigo/term/GO:0006396
hsa-miR-1301-3p	GO:0006464	BP	cellular protein modification process	Gene Ontology	33	607	4.90525e-07	2.27493e-05	91947|152559|2650|25782|5525|339287|3652|2308|55689|10664|80311|23014|545|80351|85365|3667|2624|4331|152006|23252|5128|10114|5515|8473|10425|8085|8878|79876|79871|2146|1456|5978|23358	http://amigo.geneontology.org/amigo/term/GO:0006464
hsa-miR-1301-3p	GO:0031327	BP	negative regulation of cellular biosynthetic process	Gene Ontology	19	232	5.64117e-07	2.58203e-05	25942|1831|149041|5451|5080|545|6498|80381|9212|6721|10771|7514|10236|79813|56257|1499|1386|246175|2290	http://amigo.geneontology.org/amigo/term/GO:0031327
hsa-miR-1301-3p	GO:0006357	BP	regulation of transcription by RNA polymerase II	Gene Ontology	22	306	5.90029e-07	2.59873e-05	56998|4899|10472|4782|5629|7091|55689|7071|8658|51755|7750|84458|10725|23054|11278|4603|5080|473|1386|51141|55023|4999	http://amigo.geneontology.org/amigo/term/GO:0006357
hsa-miR-1301-3p	GO:0032774	BP	RNA biosynthetic process	Gene Ontology	33	612	5.82833e-07	2.59873e-05	84449|2475|8621|6925|7091|5451|55689|60468|285550|2296|25942|8732|58486|9355|7525|63973|4331|5530|65056|7025|9212|9175|3643|8473|11278|8085|5515|25896|55635|5978|55149|7528|55023	http://amigo.geneontology.org/amigo/term/GO:0032774
hsa-miR-1301-3p	GO:0097659	BP	nucleic acid-templated transcription	Gene Ontology	33	612	5.82833e-07	2.59873e-05	84449|607|8621|8216|7799|56919|5587|24144|7091|5451|3239|246175|55749|1500|4848|84105|2117|9355|55726|4331|5324|23411|9212|10569|5515|54807|79813|862|25896|4520|55656|3224|8837	http://amigo.geneontology.org/amigo/term/GO:0097659
hsa-miR-1301-3p	GO:0015031	BP	protein transport	Gene Ontology	21	285	7.31574e-07	3.06779e-05	5784|10526|27242|56910|4170|85465|130340|149371|6396|55327|285381|3839|3320|8658|10768|3841|9776|112936|6228|8473|6218	http://amigo.geneontology.org/amigo/term/GO:0015031
hsa-miR-1301-3p	GO:0051234	BP	establishment of localization	Gene Ontology	38	773	7.27221e-07	3.06779e-05	285381|665|115123|3320|6535|5768|9181|10253|9776|23086|3069|5357|9887|11260|5784|8658|403|51499|10526|79572|10075|9276|5587|94081|9444|10282|9522|10204|8697|9749|56910|4170|7275|5108|4836|3841|1386|29803	http://amigo.geneontology.org/amigo/term/GO:0051234
hsa-miR-1301-3p	GO:0005829	CC	cytosol	Gene Ontology	30	531	7.65812e-07	3.17336e-05	3613|285381|50484|1213|56623|9181|9493|23243|8195|2224|55233|5921|55190|10768|5861|7750|84343|114088|3628|3667|9110|7353|55789|1499|22820|149371|3841|5978|10526|55585	http://amigo.geneontology.org/amigo/term/GO:0005829
hsa-miR-1301-3p	GO:0016740	MF	transferase activity	Gene Ontology	28	474	7.82665e-07	3.20527e-05	10295|2650|3320|166929|131405|5587|2526|51366|9833|9810|85465|57161|5165|5128|3703|54800|79813|23560|10425|7799|84962|142679|8878|149420|25917|2339|23411|6198	http://amigo.geneontology.org/amigo/term/GO:0016740
hsa-miR-1301-3p	GO:1901360	BP	organic cyclic compound metabolic process	Gene Ontology	44	971	8.0475e-07	3.25761e-05	4899|220988|3614|79670|64769|80153|2290|9093|65986|9877|3069|131405|84950|285550|9326|342371|51000|8658|4848|80351|7534|64710|2624|23054|1871|56257|51444|7552|4354|9175|64282|8473|9044|84124|5245|8878|22847|3221|79871|55127|9887|10771|192670|1660	http://amigo.geneontology.org/amigo/term/GO:1901360
hsa-miR-1301-3p	GO:0043933	BP	protein-containing complex subunit organization	Gene Ontology	20	263	8.47162e-07	3.35898e-05	3643|1143|607|81611|6498|5018|54822|6396|24144|51719|100996928|23064|3093|192670|9645|28976|10569|5861|51133|8473	http://amigo.geneontology.org/amigo/term/GO:0043933
hsa-miR-1301-3p	GO:0046483	BP	heterocycle metabolic process	Gene Ontology	43	940	8.48978e-07	3.35898e-05	50484|54880|8621|64282|112495|92797|65986|10797|9326|9689|84950|7264|3344|168850|9406|51755|80351|7534|6228|84307|2117|55278|2624|8204|7525|163087|4331|152006|56257|5530|65056|100996928|3643|84962|9583|10613|5978|55656|285671|11073|7182|26019|51317	http://amigo.geneontology.org/amigo/term/GO:0046483
hsa-miR-1301-3p	GO:1901363	MF	heterocyclic compound binding	Gene Ontology	39	813	9.22851e-07	3.61046e-05	2475|79572|3320|10455|394|10075|84320|9887|1982|84515|9810|7071|55749|9406|51755|10605|65003|5861|55660|57492|58486|142|2624|9444|1937|2959|9645|80034|4176|389421|80153|6334|3093|5978|80139|192670|54921|22887|4999	http://amigo.geneontology.org/amigo/term/GO:1901363
hsa-miR-1301-3p	GO:0031331	BP	positive regulation of cellular catabolic process	Gene Ontology	11	77	1.11841e-06	4.27991e-05	308|9469|9810|665|25897|149041|51444|10236|25820|9776|3643	http://amigo.geneontology.org/amigo/term/GO:0031331
hsa-miR-1301-3p	GO:0003824	MF	catalytic activity	Gene Ontology	49	1162	1.37309e-06	5.1977e-05	699|65264|8745|2650|130507|8621|9937|1937|11051|10797|131405|9493|3798|3795|10890|1778|6009|2665|4848|51499|55190|79707|140838|7750|308|3628|57551|9331|9110|4190|23252|23411|9743|23259|23193|80034|9394|54800|9583|79813|5080|84105|149420|51729|285671|54880|84062|8837|51317	http://amigo.geneontology.org/amigo/term/GO:0003824
hsa-miR-1301-3p	GO:0098805	CC	whole membrane	Gene Ontology	17	204	1.76384e-06	6.53555e-05	55847|10333|493856|4170|1213|8992|6198|7037|4179|9522|526|273|118429|4952|824|483|7514	http://amigo.geneontology.org/amigo/term/GO:0098805
hsa-miR-1301-3p	GO:0070727	BP	cellular macromolecule localization	Gene Ontology	17	206	1.995e-06	7.23886e-05	3841|8888|10075|55726|5080|6396|55327|57120|5784|6950|6721|5530|3181|80351|89781|2534|10425	http://amigo.geneontology.org/amigo/term/GO:0070727
hsa-miR-1301-3p	GO:0065007	BP	biological regulation	Gene Ontology	67	1832	2.07455e-06	7.4123e-05	323|1143|57862|9125|2290|100302652|57448|9645|4763|55692|5525|23185|56919|149041|23086|149371|203547|5784|830|51366|8867|3093|9833|11113|112936|58477|3572|10664|285550|51430|9406|23395|7534|26036|200894|26019|10526|84458|142|9355|3815|10725|3839|55723|9887|116150|55789|10116|5999|7336|55585|51231|84124|11004|8992|80381|3841|89781|5795|10771|80139|9972|55149|6218|51317|2534|4850	http://amigo.geneontology.org/amigo/term/GO:0065007
hsa-miR-1301-3p	GO:0016310	BP	phosphorylation	Gene Ontology	23	360	2.1964e-06	7.76839e-05	5525|55300|51265|8658|57161|79707|25778|10333|1139|1159|5165|9448|54206|7046|5756|387|3643|4176|51231|23064|2146|6198|2534	http://amigo.geneontology.org/amigo/term/GO:0016310
hsa-miR-1301-3p	GO:0018394	BP	peptidyl-lysine acetylation	Gene Ontology	7	26	2.75897e-06	9.61247e-05	64769|80314|79903|23411|339287|10445|8473	http://amigo.geneontology.org/amigo/term/GO:0018394
hsa-miR-1301-3p	GO:0070647	BP	protein modification by small protein conjugation or removal	Gene Ontology	15	170	3.71801e-06	0.000127011	114088|10274|5708|11275|84541|130507|149041|153830|23252|10477|285671|9212|51366|3652|9972	http://amigo.geneontology.org/amigo/term/GO:0070647
hsa-miR-1301-3p	GO:0036211	BP	protein modification process	Gene Ontology	32	643	4.26283e-06	0.000142155	91947|10274|152559|65264|130507|57448|4763|79903|149041|6480|51366|51719|55704|6198|3667|142|5165|2624|55827|1033|10114|55689|11236|10425|7443|2339|23683|9031|8878|54532|54822|2534	http://amigo.geneontology.org/amigo/term/GO:0036211
hsa-miR-1301-3p	GO:0016020	CC	membrane	Gene Ontology	55	1443	5.69558e-06	0.000186384	7514|3920|90120|23185|80195|11273|7037|57448|7798|166929|10455|394|1139|10075|490|2821|830|84950|1983|7265|23446|85465|4709|27087|26136|403|29914|308|10330|9331|54805|94081|9583|5108|7046|10787|118429|4354|1499|23190|9694|149371|57650|84962|9900|4814|79183|7353|79937|55127|9929|1386|4999|23141|8641	http://amigo.geneontology.org/amigo/term/GO:0016020
hsa-miR-1301-3p	GO:2001141	BP	regulation of RNA biosynthetic process	Gene Ontology	31	621	5.66054e-06	0.000186384	4303|2290|65056|64412|6721|9181|9774|4782|57492|2308|7091|55689|60468|55749|7514|51755|29915|7552|84307|64710|389421|9645|5515|54807|905|8878|5530|80139|57157|8837|54927	http://amigo.geneontology.org/amigo/term/GO:2001141
hsa-miR-1301-3p	GO:1901362	BP	organic cyclic compound biosynthetic process	Gene Ontology	33	689	6.49486e-06	0.000210572	4303|10472|9181|10114|5587|1717|323|5451|3239|5455|80314|1500|27161|545|152485|8732|7750|4331|7353|6950|1499|9175|3643|9044|84967|54807|84962|51379|79813|84307|6788|7528|4853	http://amigo.geneontology.org/amigo/term/GO:1901362
hsa-miR-1301-3p	GO:0017148	BP	negative regulation of translation	Gene Ontology	6	19	6.73286e-06	0.000216285	57721|9444|10236|23019|131405|192670	http://amigo.geneontology.org/amigo/term/GO:0017148
hsa-miR-1301-3p	GO:2000113	BP	negative regulation of cellular macromolecule biosynthetic process	Gene Ontology	16	203	6.81937e-06	0.000217073	8085|1831|10445|7091|5245|8204|10138|10009|5455|6498|23411|7025|29915|1499|54927|4999	http://amigo.geneontology.org/amigo/term/GO:2000113
hsa-miR-1301-3p	GO:0031324	BP	negative regulation of cellular metabolic process	Gene Ontology	22	360	7.05852e-06	0.000222661	9125|10236|10472|24144|1660|9810|10664|55749|3181|51499|23411|10114|5999|84101|8473|5245|1998|5795|3224|51141|23141|4999	http://amigo.geneontology.org/amigo/term/GO:0031324
hsa-miR-1301-3p	GO:0009056	BP	catabolic process	Gene Ontology	24	417	7.14692e-06	0.000223437	3920|84640|665|25782|10455|2308|5707|153830|200081|26019|3667|7353|57602|9317|23259|51444|23190|27072|10425|389421|22875|149041|55149|824	http://amigo.geneontology.org/amigo/term/GO:0009056
hsa-miR-1301-3p	GO:1903047	BP	mitotic cell cycle process	Gene Ontology	12	115	7.28962e-06	0.000225882	84967|4176|29883|84962|3643|9181|8621|246175|387|9212|25942|131405	http://amigo.geneontology.org/amigo/term/GO:1903047
hsa-miR-1301-3p	GO:0043167	MF	ion binding	Gene Ontology	41	962	7.86727e-06	0.000240587	140809|79670|10295|130507|10009|64412|2192|273|152273|10472|3795|81609|9767|80777|58477|6009|8658|2665|403|25820|25778|57519|3628|5165|223082|10138|2959|6950|10569|11278|7182|9044|79876|4520|6334|23405|80139|824|1386|56101|4850	http://amigo.geneontology.org/amigo/term/GO:0043167
hsa-miR-1301-3p	GO:0042592	BP	homeostatic process	Gene Ontology	17	233	9.204e-06	0.000276633	5587|3667|4170|5165|54805|9937|79572|526|140609|3093|4763|5768|7037|9212|10445|3643|8473	http://amigo.geneontology.org/amigo/term/GO:0042592
hsa-miR-1301-3p	GO:0043168	MF	anion binding	Gene Ontology	25	454	9.50882e-06	0.000283363	65264|10477|273|10455|56919|51479|490|8195|81609|5985|55704|83990|79707|23236|9448|5128|9645|9044|7443|23683|149420|7525|23020|55585|26225	http://amigo.geneontology.org/amigo/term/GO:0043168
hsa-miR-1301-3p	GO:0007275	BP	multicellular organism development	Gene Ontology	36	802	9.7587e-06	0.000286045	2734|64343|10658|130507|9093|3320|55692|7037|131405|2821|24144|1717|23086|7071|3977|545|23019|56623|9444|63973|7799|4774|9212|5515|27130|8473|10425|7182|7275|85458|22846|7353|2146|25914|4952|1386	http://amigo.geneontology.org/amigo/term/GO:0007275
hsa-miR-1301-3p	GO:0009059	BP	macromolecule biosynthetic process	Gene Ontology	38	869	9.76222e-06	0.000286045	4303|4899|29883|112495|11051|6721|10274|56919|6925|9774|1983|5629|2058|10664|27087|4848|545|6228|9044|7353|84307|58487|9331|7525|5324|1937|2959|7025|6950|3703|10569|23560|5329|84967|5080|84105|11073|8837	http://amigo.geneontology.org/amigo/term/GO:0009059
hsa-miR-1301-3p	GO:0006886	BP	intracellular protein transport	Gene Ontology	13	141	1.05645e-05	0.000304457	130340|10075|51692|11260|3839|58477|27072|56910|5108|9776|23086|4580|8473	http://amigo.geneontology.org/amigo/term/GO:0006886
hsa-miR-1301-3p	GO:0007165	BP	signal transduction	Gene Ontology	40	940	1.0488e-05	0.000304457	5515|152559|2475|64769|665|57448|2192|5525|9181|1139|323|2821|6908|2308|51444|5708|7091|9833|7071|5985|8658|2734|57161|4848|51499|23019|57551|10725|11073|5530|23411|9743|9175|79813|3643|2339|192670|81609|51141|4853	http://amigo.geneontology.org/amigo/term/GO:0007165
hsa-miR-1301-3p	GO:0140096	MF	catalytic activity, acting on a protein	Gene Ontology	26	488	1.09751e-05	0.000313708	152559|10295|440590|8621|1139|5708|2146|9833|699|5784|80311|51755|114088|57551|9448|54206|116154|9749|5080|25897|149041|3093|1456|5978|5793|6198	http://amigo.geneontology.org/amigo/term/GO:0140096
hsa-miR-1301-3p	GO:0010564	BP	regulation of cell cycle process	Gene Ontology	10	81	1.10662e-05	0.000313752	55719|699|2146|7514|10615|8812|9212|25942|3643|55660	http://amigo.geneontology.org/amigo/term/GO:0010564
hsa-miR-1301-3p	GO:0045934	BP	negative regulation of nucleobase-containing compound metabolic process	Gene Ontology	16	212	1.13176e-05	0.000315765	54927|84458|84962|79813|2290|10138|64412|23013|7514|23411|3181|1998|25942|5814|51317|2117	http://amigo.geneontology.org/amigo/term/GO:0045934
hsa-miR-1301-3p	GO:0051172	BP	negative regulation of nitrogen compound metabolic process	Gene Ontology	20	316	1.12926e-05	0.000315765	5999|1213|55635|2624|7091|5515|5080|10138|5795|2146|4763|4848|8473|7025|7528|23013|3643|10114|11236|5329	http://amigo.geneontology.org/amigo/term/GO:0051172
hsa-miR-1301-3p	GO:0015630	CC	microtubule cytoskeleton	Gene Ontology	14	167	1.33174e-05	0.000368624	8867|4154|1213|11215|84984|4190|84541|57223|26052|9181|9212|4999|57606|1660	http://amigo.geneontology.org/amigo/term/GO:0015630
hsa-miR-1301-3p	GO:0044085	BP	cellular component biogenesis	Gene Ontology	23	405	1.34805e-05	0.00037021	1143|55704|627|23208|64282|3320|55692|51719|9776|8867|24144|9493|5629|8195|4709|10664|65003|4331|27072|80153|23020|8837|57606	http://amigo.geneontology.org/amigo/term/GO:0044085
hsa-miR-1301-3p	GO:1901576	BP	organic substance biosynthetic process	Gene Ontology	41	990	1.49429e-05	0.000407179	5080|64282|7799|3613|4782|57492|2526|1717|27087|2224|23013|5985|168850|55749|1500|9406|80351|50640|9044|9469|8204|10138|4331|9212|3643|4603|5329|84967|4176|84124|905|51379|51616|4528|79871|140609|55300|57157|51141|6198|6228	http://amigo.geneontology.org/amigo/term/GO:1901576
hsa-miR-1301-3p	GO:0043043	BP	peptide biosynthetic process	Gene Ontology	12	125	1.58098e-05	0.000427474	285381|149041|9125|2058|10605|246175|10236|57721|28977|23438|131405|11236	http://amigo.geneontology.org/amigo/term/GO:0043043
hsa-miR-1301-3p	GO:0005912	CC	adherens junction	Gene Ontology	10	86	1.7809e-05	0.000477842	1213|144100|85458|7525|55327|4179|1500|1499|84962|23022	http://amigo.geneontology.org/amigo/term/GO:0005912
hsa-miR-1301-3p	GO:0071840	BP	cellular component organization or biogenesis	Gene Ontology	39	929	1.80288e-05	0.000480059	4899|55719|607|3320|23347|79903|92797|339287|3064|51479|137886|10125|51000|55704|323|7514|27161|84343|2475|9469|51202|284114|2624|10282|10445|23259|89781|8878|80153|2146|1456|390|10615|23061|2339|28977|84062|2534|6218	http://amigo.geneontology.org/amigo/term/GO:0071840
hsa-miR-1301-3p	GO:0007154	BP	cell communication	Gene Ontology	41	1003	1.99117e-05	0.000524217	152559|50484|394|100302652|3320|4763|390|55233|152273|9655|149041|490|2821|121512|51366|9833|5707|51130|83990|200081|10526|3667|3815|8204|7525|8650|9043|4170|51444|3643|54800|6396|2192|4836|2146|440193|80139|6788|51141|26225|4850	http://amigo.geneontology.org/amigo/term/GO:0007154
hsa-miR-1301-3p	GO:0048869	BP	cellular developmental process	Gene Ontology	29	601	2.04275e-05	0.000533784	152559|2475|9093|23086|2308|1717|124936|80207|121512|10890|7071|51430|4848|5921|1213|10075|9355|5530|23560|8473|23236|57486|5245|8878|4179|1456|3224|84062|6198	http://amigo.geneontology.org/amigo/term/GO:0048869
hsa-miR-1301-3p	GO:1901265	MF	nucleoside phosphate binding	Gene Ontology	22	388	2.10853e-05	0.000546889	140809|10658|23347|10455|55278|7203|9833|11113|2665|403|51755|50640|142|23250|6950|23560|4528|11004|149420|2058|55585|4850	http://amigo.geneontology.org/amigo/term/GO:1901265
hsa-miR-1301-3p	GO:0000278	BP	mitotic cell cycle	Gene Ontology	12	130	2.26689e-05	0.000581504	7443|9125|55726|8621|140609|55125|2146|9972|8697|55142|23141|23236	http://amigo.geneontology.org/amigo/term/GO:0000278
hsa-miR-1301-3p	GO:0009889	BP	regulation of biosynthetic process	Gene Ontology	31	670	2.31341e-05	0.000586987	54880|6498|9093|25782|10236|9181|6925|5629|5455|168850|323|54505|3181|10605|25942|7699|84458|545|163087|1937|2959|9212|1499|8473|84962|1997|79813|84307|10613|7525|22887	http://amigo.geneontology.org/amigo/term/GO:0009889
hsa-miR-1301-3p	GO:0050794	BP	regulation of cellular process	Gene Ontology	57	1600	2.50389e-05	0.000626672	7514|90120|627|9125|3613|2296|64412|9093|1937|25782|64343|152273|9655|56919|9493|23259|10125|493856|5708|5629|85460|5999|2821|5784|2665|4848|5921|51755|29915|56257|1033|55660|10526|58487|9448|55726|4331|5324|23411|387|403|9175|483|9749|90637|7336|84962|3181|222068|905|7275|25896|2146|5795|192670|10787|4999	http://amigo.geneontology.org/amigo/term/GO:0050794
hsa-miR-1301-3p	GO:0090304	BP	nucleic acid metabolic process	Gene Ontology	35	811	2.81357e-05	0.000698703	56998|55520|6498|9031|10075|51444|5708|9355|342371|5784|27161|9406|23019|7552|152485|284309|8731|142|2624|4774|5530|7025|51366|9175|23438|54921|23236|51499|389421|84124|862|473|10613|51729|1478	http://amigo.geneontology.org/amigo/term/GO:0090304
hsa-miR-1301-3p	GO:0035556	BP	intracellular signal transduction	Gene Ontology	23	430	3.27781e-05	0.000808257	2475|6498|9093|2192|10253|10125|9833|55233|4848|25778|54206|10787|84062|1499|9175|23236|142679|222068|4853|192670|23411|7182|6198	http://amigo.geneontology.org/amigo/term/GO:0035556
hsa-miR-1301-3p	GO:0044772	BP	mitotic cell cycle phase transition	Gene Ontology	9	74	3.37821e-05	0.000824306	2059|84101|55125|246175|56257|5108|51499|23019|25942	http://amigo.geneontology.org/amigo/term/GO:0044772
hsa-miR-1301-3p	GO:0031975	CC	envelope	Gene Ontology	14	183	3.42856e-05	0.000824312	84950|23534|27101|5245|4001|80777|163087|10390|80314|7514|23411|28977|4580|23236	http://amigo.geneontology.org/amigo/term/GO:0031975
hsa-miR-1301-3p	GO:0043412	BP	macromolecule modification	Gene Ontology	30	652	3.43709e-05	0.000824312	55704|115123|7799|10253|5587|5784|54502|114088|285381|3667|142|2624|9448|223082|23252|200734|5530|51444|23560|5329|7336|905|8878|5080|23683|285671|7525|57602|55585|6198	http://amigo.geneontology.org/amigo/term/GO:0043412
hsa-miR-1301-3p	GO:0031090	CC	organelle membrane	Gene Ontology	25	493	3.49099e-05	0.000831544	5018|606495|10857|7265|81609|51430|80314|7514|83990|1315|1159|223082|26953|9583|7353|116150|3703|23190|23236|4170|222068|8992|9694|51141|4580	http://amigo.geneontology.org/amigo/term/GO:0031090
hsa-miR-1301-3p	GO:0051173	BP	positive regulation of nitrogen compound metabolic process	Gene Ontology	23	436	4.01165e-05	0.000938426	7046|10274|65056|3320|25782|23185|131405|10125|7203|23054|8204|4774|5530|23411|387|8085|142679|51379|55827|5245|10613|5978|6198	http://amigo.geneontology.org/amigo/term/GO:0051173
hsa-miR-1301-3p	GO:0023057	BP	negative regulation of signaling	Gene Ontology	14	186	4.0469e-05	0.000938426	152559|3667|9181|9125|1997|3064|10771|2192|5530|4848|51499|9462|5515|51231	http://amigo.geneontology.org/amigo/term/GO:0023057
hsa-miR-1301-3p	GO:0004674	MF	protein serine/threonine kinase activity	Gene Ontology	11	117	4.22696e-05	0.000969749	7443|84962|5165|5629|5515|23683|8812|1033|25778|54822|23560	http://amigo.geneontology.org/amigo/term/GO:0004674
hsa-miR-1301-3p	GO:0030117	CC	membrane coat	Gene Ontology	5	16	4.25122e-05	0.000969749	1213|1315|27072|9276|54812	http://amigo.geneontology.org/amigo/term/GO:0030117
hsa-miR-1301-3p	GO:0016604	CC	nuclear body	Gene Ontology	8	59	4.57931e-05	0.00103783	24144|23524|11073|545|8621|9879|26036|23236	http://amigo.geneontology.org/amigo/term/GO:0016604
hsa-miR-1301-3p	GO:0044403	BP	symbiotic process	Gene Ontology	11	120	5.23027e-05	0.00117396	1948|2224|10313|7037|3839|3841|3843|5978|10787|29915|5861	http://amigo.geneontology.org/amigo/term/GO:0044403
hsa-miR-1301-3p	GO:0005730	CC	nucleolus	Gene Ontology	12	143	5.3808e-05	0.00120006	5393|23064|39|3550|64412|64282|10664|7514|9972|55127|4782|8731	http://amigo.geneontology.org/amigo/term/GO:0005730
hsa-miR-1301-3p	GO:0001932	BP	regulation of protein phosphorylation	Gene Ontology	14	192	5.58239e-05	0.00123714	2308|2475|142679|9448|5245|905|2192|4331|200734|5587|10114|5999|8473|23236	http://amigo.geneontology.org/amigo/term/GO:0001932
hsa-miR-1301-3p	GO:0010468	BP	regulation of gene expression	Gene Ontology	30	671	5.65311e-05	0.00124443	10274|10658|2290|10009|84105|23405|23185|9879|57492|10664|1983|8195|168850|285550|4848|7534|284309|10526|2624|6498|1871|5324|11278|8085|8658|4179|8812|9689|7528|22887	http://amigo.geneontology.org/amigo/term/GO:0010468
hsa-miR-1301-3p	GO:0019538	BP	protein metabolic process	Gene Ontology	37	911	5.68638e-05	0.00124443	152559|285381|665|100302652|8621|9093|2192|2821|3652|51444|5708|1983|5629|3093|2058|84541|5707|55704|5921|89910|25942|9469|10333|223082|7046|10116|9175|23438|5515|23358|79813|9929|28977|824|54532|6198|51317	http://amigo.geneontology.org/amigo/term/GO:0019538
hsa-miR-1301-3p	GO:0043228	CC	non-membrane-bounded organelle	Gene Ontology	28	606	5.79685e-05	0.00125094	23185|10472|10120|10857|3550|11073|699|3843|57223|4848|80351|200894|8204|23019|1499|51444|5515|7443|84962|8878|5080|57606|10592|25914|10615|55142|283431|1660	http://amigo.geneontology.org/amigo/term/GO:0043228
hsa-miR-1301-3p	GO:1901565	BP	organonitrogen compound catabolic process	Gene Ontology	13	168	5.80547e-05	0.00125094	152006|9583|8878|3093|55627|51528|22875|7514|285671|84101|587|137886|23014	http://amigo.geneontology.org/amigo/term/GO:1901565
hsa-miR-1301-3p	GO:0048518	BP	positive regulation of biological process	Gene Ontology	35	845	6.19237e-05	0.00132615	1143|23236|10274|55719|10236|7037|6925|149041|57492|5587|2059|5455|51430|6009|4848|545|25942|5108|10333|284114|10725|23054|4190|200734|51444|5329|8085|89781|2339|84105|80381|23064|57602|7182|51141	http://amigo.geneontology.org/amigo/term/GO:0048518
hsa-miR-1301-3p	GO:0048585	BP	negative regulation of response to stimulus	Gene Ontology	15	220	6.28183e-05	0.00133713	2734|84962|8195|54206|9110|80381|2146|200734|10906|92797|3064|51366|9093|5999|10771	http://amigo.geneontology.org/amigo/term/GO:0048585
hsa-miR-1301-3p	GO:0051641	BP	cellular localization	Gene Ontology	20	360	6.4283e-05	0.00135663	8867|55719|10075|11004|89781|26985|665|10282|1604|1213|56910|10123|5530|9181|9212|10445|81562|27072|8473|1660	http://amigo.geneontology.org/amigo/term/GO:0051641
hsa-miR-1301-3p	GO:0003700	MF	DNA-binding transcription factor activity	Gene Ontology	15	221	6.59037e-05	0.00137768	58486|58487|1997|2624|3815|5451|1871|3221|60468|8216|3224|7071|26036|9175|6908	http://amigo.geneontology.org/amigo/term/GO:0003700
hsa-miR-1301-3p	GO:0046364	BP	monosaccharide biosynthetic process	Gene Ontology	5	18	6.80759e-05	0.00141464	2308|57223|2821|4190|57486	http://amigo.geneontology.org/amigo/term/GO:0046364
hsa-miR-1301-3p	GO:1903506	BP	regulation of nucleic acid-templated transcription	Gene Ontology	26	549	7.20507e-05	0.00148403	84449|29883|65056|9093|57862|6925|5455|342371|56257|84307|84458|3815|10138|63973|6498|7025|8473|9044|79813|4520|8812|7525|60468|1386|54927|51317	http://amigo.geneontology.org/amigo/term/GO:1903506
hsa-miR-1301-3p	GO:0009057	BP	macromolecule catabolic process	Gene Ontology	14	198	7.60391e-05	0.00155702	5393|152006|51366|57602|5245|130507|9810|9887|27161|192670|824|8878|1499|23358	http://amigo.geneontology.org/amigo/term/GO:0009057
hsa-miR-1301-3p	GO:0009893	BP	positive regulation of metabolic process	Gene Ontology	23	457	7.8829e-05	0.00159549	65056|9776|131405|4782|51000|25820|200081|25942|142|10725|23054|2296|5324|7046|9043|7182|84962|1997|51379|55827|80381|54921|246175	http://amigo.geneontology.org/amigo/term/GO:0009893
hsa-miR-1301-3p	GO:0050768	BP	negative regulation of neurogenesis	Gene Ontology	7	47	8.03864e-05	0.00161766	152559|85458|9181|5530|5108|5978|387	http://amigo.geneontology.org/amigo/term/GO:0050768
hsa-miR-1301-3p	GO:2000112	BP	regulation of cellular macromolecule biosynthetic process	Gene Ontology	28	619	8.18786e-05	0.00163361	7514|2475|64769|64412|7799|6925|1831|5451|55689|246175|55749|10771|27161|3181|23019|25942|51499|63973|4331|5530|5515|54921|152485|5978|22887|7528|5814|388566	http://amigo.geneontology.org/amigo/term/GO:2000112
hsa-miR-1301-3p	GO:0006366	BP	transcription by RNA polymerase II	Gene Ontology	19	338	8.39036e-05	0.00165515	5587|8732|142|2624|7091|5451|8204|3239|6498|9093|2146|5530|4848|1871|1499|1386|4331|23411|7514	http://amigo.geneontology.org/amigo/term/GO:0006366
hsa-miR-1301-3p	GO:0035639	MF	purine ribonucleoside triphosphate binding	Gene Ontology	18	309	8.36868e-05	0.00165515	149420|7443|9493|51231|3815|3795|8732|7525|56919|2475|6334|390|403|387|79707|200894|3643|9044	http://amigo.geneontology.org/amigo/term/GO:0035639
hsa-miR-1301-3p	GO:0009891	BP	positive regulation of biosynthetic process	Gene Ontology	18	311	9.0385e-05	0.00176204	3667|25942|84962|9355|905|5245|1998|65056|6950|10613|9031|23185|10605|6925|6198|51141|3643|64710	http://amigo.geneontology.org/amigo/term/GO:0009891
hsa-miR-1301-3p	GO:0009892	BP	negative regulation of metabolic process	Gene Ontology	21	402	9.73422e-05	0.00186213	80034|8085|24144|149041|142|5629|5018|9444|10138|57448|9749|10664|5245|5795|5978|9972|9212|51366|1386|25942|4782	http://amigo.geneontology.org/amigo/term/GO:0009892
hsa-miR-1301-3p	GO:0016311	BP	dephosphorylation	Gene Ontology	9	86	9.82948e-05	0.00186213	8867|142679|81611|140838|116154|55313|5793|23035|5515	http://amigo.geneontology.org/amigo/term/GO:0016311
hsa-miR-1301-3p	GO:0016787	MF	hydrolase activity	Gene Ontology	27	593	9.83846e-05	0.00186213	5018|51692|273|9181|9493|5587|1983|2665|55313|55190|23019|1033|140838|3667|9110|9373|55627|9743|80034|51279|81611|57486|4179|2146|51317|2534|1660	http://amigo.geneontology.org/amigo/term/GO:0016787
hsa-miR-1301-3p	GO:0019438	BP	aromatic compound biosynthetic process	Gene Ontology	31	727	9.76962e-05	0.00186213	8621|64412|112495|11051|9031|2308|85460|7264|342371|168850|323|1500|27161|8731|5160|84458|2624|3815|8204|9645|5324|23411|9212|1499|8473|5245|1998|84105|10613|1478|388566	http://amigo.geneontology.org/amigo/term/GO:0019438
hsa-miR-1301-3p	GO:0007264	BP	small GTPase mediated signal transduction	Gene Ontology	9	86	9.82948e-05	0.00186213	5587|10890|9462|6009|5921|394|4952|10125|55789	http://amigo.geneontology.org/amigo/term/GO:0007264
hsa-miR-1301-3p	GO:0050896	BP	response to stimulus	Gene Ontology	48	1343	0.000101336	0.00190767	5515|2734|4899|29883|3320|23308|6535|92797|11228|5985|490|10125|24144|27242|9833|11113|246175|526|5921|7534|51616|51202|1213|58487|10075|54206|1948|55603|23411|11215|10445|51444|3643|23236|90637|38|100507436|222068|89781|2339|22846|6396|3093|80139|192670|7525|84062|4853	http://amigo.geneontology.org/amigo/term/GO:0050896
hsa-miR-1301-3p	GO:1903827	BP	regulation of cellular protein localization	Gene Ontology	8	67	0.000103413	0.00193636	142|85465|4836|6721|7514|10445|5108|2534	http://amigo.geneontology.org/amigo/term/GO:1903827
hsa-miR-1301-3p	GO:0017038	BP	protein import	Gene Ontology	5	20	0.000104094	0.00193875	3320|8888|3920|26953|3843	http://amigo.geneontology.org/amigo/term/GO:0017038
hsa-miR-1301-3p	GO:0036094	MF	small molecule binding	Gene Ontology	23	467	0.000106974	0.00198184	79572|9093|23347|23405|394|9493|2821|8195|7203|2058|51265|54502|83990|26052|200894|5861|9448|5756|9212|10114|11004|140609|81562	http://amigo.geneontology.org/amigo/term/GO:0036094
hsa-miR-1301-3p	GO:0032559	MF	adenyl ribonucleotide binding	Gene Ontology	16	259	0.000108072	0.00199165	84320|5587|8195|7203|9448|3320|3795|1456|9031|51755|9879|28976|9175|23438|3643|1660	http://amigo.geneontology.org/amigo/term/GO:0032559
hsa-miR-1301-3p	GO:0042886	BP	amide transport	Gene Ontology	17	288	0.000112291	0.00205857	10526|3920|2665|8992|10311|11260|26953|55187|56910|8658|3843|10560|7037|9877|10569|7353|54812	http://amigo.geneontology.org/amigo/term/GO:0042886
hsa-miR-1301-3p	GO:0071383	BP	cellular response to steroid hormone stimulus	Gene Ontology	6	34	0.000113967	0.00207842	51366|54206|23054|79876|7025|8204	http://amigo.geneontology.org/amigo/term/GO:0071383
hsa-miR-1301-3p	GO:0032268	BP	regulation of cellular protein metabolic process	Gene Ontology	20	377	0.000116283	0.00210505	91947|1139|23786|84962|3815|5999|25897|4763|285381|4331|55704|200734|5978|5756|23185|10125|26036|123879|3643|23141	http://amigo.geneontology.org/amigo/term/GO:0032268
hsa-miR-1301-3p	GO:0030554	MF	adenyl nucleotide binding	Gene Ontology	16	262	0.000122489	0.00218824	140809|2475|3798|3795|2058|51265|1778|140609|6334|9175|10455|6788|6950|25778|10120|80273	http://amigo.geneontology.org/amigo/term/GO:0030554
hsa-miR-1301-3p	GO:0008270	MF	zinc ion binding	Gene Ontology	13	182	0.000123493	0.00219498	49855|2624|253832|8878|8745|10138|153830|26136|9767|7025|7528|27072|130507	http://amigo.geneontology.org/amigo/term/GO:0008270
hsa-miR-1301-3p	GO:0018130	BP	heterocycle biosynthetic process	Gene Ontology	30	707	0.000136448	0.00240691	9125|64412|9093|11051|23405|92797|4782|285550|7203|5455|168850|80314|253558|83990|8732|284309|2117|10725|23054|55827|8473|84967|84962|905|51379|7353|10613|7182|54927|4999	http://amigo.geneontology.org/amigo/term/GO:0018130
hsa-miR-1301-3p	GO:0051049	BP	regulation of transport	Gene Ontology	16	265	0.000138558	0.00243189	308|1143|10075|8867|7275|665|6721|85465|4763|51729|23411|8473|4836|134957|11236|10425	http://amigo.geneontology.org/amigo/term/GO:0051049
hsa-miR-1301-3p	GO:0009890	BP	negative regulation of biosynthetic process	Gene Ontology	15	239	0.000149133	0.002585	58487|9125|5245|2058|5080|5455|342371|60468|55749|79813|2290|545|26036|51616|51317	http://amigo.geneontology.org/amigo/term/GO:0009890
hsa-miR-1301-3p	GO:0051253	BP	negative regulation of RNA metabolic process	Gene Ontology	13	188	0.000166879	0.00285038	2475|1831|5245|79813|54880|23013|80314|4774|4848|29915|9212|80139|2117	http://amigo.geneontology.org/amigo/term/GO:0051253
hsa-miR-1301-3p	GO:0000139	CC	Golgi membrane	Gene Ontology	10	115	0.000169583	0.0028825	1315|27087|56623|51000|8658|283464|29914|6009|5861|22820	http://amigo.geneontology.org/amigo/term/GO:0000139
hsa-miR-1301-3p	GO:0046914	MF	transition metal ion binding	Gene Ontology	14	215	0.000171487	0.00290078	57553|84101|115123|10138|50|149041|473|10771|148479|2959|9031|131405|7750|10425	http://amigo.geneontology.org/amigo/term/GO:0046914
hsa-miR-1301-3p	GO:0051130	BP	positive regulation of cellular component organization	Gene Ontology	13	189	0.000175255	0.00293614	308|5587|2475|25782|7203|4190|2146|51729|6950|1499|51479|9469|55023	http://amigo.geneontology.org/amigo/term/GO:0051130
hsa-miR-1301-3p	GO:0032502	BP	developmental process	Gene Ontology	36	932	0.000182988	0.00304386	607|9469|394|55327|5455|7798|9181|4836|23086|4782|9833|7071|54502|403|26052|5861|7750|2117|54206|8204|63973|9825|10116|23259|5515|23022|57486|79813|4179|80381|23064|3224|4952|7528|4853|2534	http://amigo.geneontology.org/amigo/term/GO:0032502
hsa-miR-1301-3p	GO:0031326	BP	regulation of cellular biosynthetic process	Gene Ontology	28	652	0.00018686	0.00309357	2475|64769|7799|23405|2308|1831|6788|3239|342371|10664|323|7514|51755|284309|3815|4331|5515|11278|389421|84962|1997|57721|22847|84105|473|80139|5587|5814	http://amigo.geneontology.org/amigo/term/GO:0031326
hsa-miR-1301-3p	GO:0019904	MF	protein domain specific binding	Gene Ontology	9	95	0.000197026	0.00322377	3667|54206|490|9444|2475|55835|7534|6198|5329	http://amigo.geneontology.org/amigo/term/GO:0019904
hsa-miR-1301-3p	GO:0044262	BP	cellular carbohydrate metabolic process	Gene Ontology	6	38	0.00019627	0.00322377	3643|8867|5165|56623|57223|2820	http://amigo.geneontology.org/amigo/term/GO:0044262
hsa-miR-1301-3p	GO:1902679	BP	negative regulation of RNA biosynthetic process	Gene Ontology	13	192	0.000202581	0.00329925	11278|2624|1998|10009|7071|473|23405|9044|29915|7528|79813|5814|4999	http://amigo.geneontology.org/amigo/term/GO:1902679
hsa-miR-1301-3p	GO:0022402	BP	cell cycle process	Gene Ontology	13	193	0.000212467	0.00343627	5515|55835|3643|22846|8621|51719|10664|5530|10615|51499|9181|10253|4853	http://amigo.geneontology.org/amigo/term/GO:0022402
hsa-miR-1301-3p	GO:0098588	CC	bounding membrane of organelle	Gene Ontology	16	276	0.000214267	0.00344946	2734|9110|665|3107|1604|51430|51000|526|273|57120|118429|80351|84062|81562|6198|22820	http://amigo.geneontology.org/amigo/term/GO:0098588
hsa-miR-1301-3p	GO:0031098	BP	stress-activated protein kinase signaling cascade	Gene Ontology	6	39	0.00022278	0.00356194	10333|57551|6788|84062|9175|23236	http://amigo.geneontology.org/amigo/term/GO:0031098
hsa-miR-1301-3p	GO:0005615	CC	extracellular space	Gene Ontology	26	596	0.000248536	0.00393778	2734|4899|9043|55610|7798|830|5708|7203|7264|10890|4709|403|26052|23193|55847|1159|6950|3643|23236|7336|5245|6396|3795|7525|54927|56101	http://amigo.geneontology.org/amigo/term/GO:0005615
hsa-miR-1301-3p	GO:0003677	MF	DNA binding	Gene Ontology	20	401	0.000251755	0.00397081	84449|8085|25942|3614|63973|6498|5080|163087|5455|8658|6721|51729|545|6925|3239|5985|5814|4782|284309|4999	http://amigo.geneontology.org/amigo/term/GO:0003677
hsa-miR-1301-3p	GO:0005925	CC	focal adhesion	Gene Ontology	7	58	0.000262933	0.00411009	1213|4810|55827|2665|8650|387|7534	http://amigo.geneontology.org/amigo/term/GO:0005925
hsa-miR-1301-3p	GO:0008134	MF	transcription factor binding	Gene Ontology	9	99	0.000261955	0.00411009	1831|7091|5080|23013|5978|80139|9181|56919|6908	http://amigo.geneontology.org/amigo/term/GO:0008134
hsa-miR-1301-3p	GO:0031982	CC	vesicle	Gene Ontology	28	667	0.000265733	0.00413539	5393|130340|824|115123|55610|2192|9657|152273|9181|830|55233|403|54918|54812|23236|51279|9583|10204|387|483|23193|7336|9900|222068|89781|84062|55752|55023	http://amigo.geneontology.org/amigo/term/GO:0031982
hsa-miR-1301-3p	GO:0016887	MF	ATPase activity	Gene Ontology	7	59	0.000289262	0.0044521	10061|84515|164832|3320|92797|9044|1660	http://amigo.geneontology.org/amigo/term/GO:0016887
hsa-miR-1301-3p	GO:1990904	CC	ribonucleoprotein complex	Gene Ontology	8	79	0.000292324	0.00447954	51631|84950|84967|23020|220988|54505|28977|6228	http://amigo.geneontology.org/amigo/term/GO:1990904
hsa-miR-1301-3p	GO:0018193	BP	peptidyl-amino acid modification	Gene Ontology	12	174	0.000300613	0.00456658	10664|2475|51231|152559|79813|3320|9972|9655|10445|1386|8473|9767	http://amigo.geneontology.org/amigo/term/GO:0018193
hsa-miR-1301-3p	GO:0046649	BP	lymphocyte activation	Gene Ontology	9	101	0.000300529	0.00456658	27242|7525|2475|80381|23308|5530|1499|200081|10125	http://amigo.geneontology.org/amigo/term/GO:0046649
hsa-miR-1301-3p	GO:0006626	BP	protein targeting to mitochondrion	Gene Ontology	5	26	0.000302398	0.00457385	89781|57602|6721|51729|4580	http://amigo.geneontology.org/amigo/term/GO:0006626
hsa-miR-1301-3p	GO:0032991	CC	protein-containing complex	Gene Ontology	27	639	0.000308121	0.00464037	10295|143686|55610|2192|23185|51479|7203|81609|60468|154007|27161|2117|5160|1139|55278|23054|7046|22828|10569|9312|8085|8992|10592|55656|8812|7528|55142	http://amigo.geneontology.org/amigo/term/GO:0032991
hsa-miR-1301-3p	GO:0000166	MF	nucleotide binding	Gene Ontology	19	377	0.000314629	0.00471809	10061|3614|8195|2058|545|10009|5985|8621|23064|5128|3181|23185|22828|6950|79707|9175|200894|80273|4850	http://amigo.geneontology.org/amigo/term/GO:0000166
hsa-miR-1301-3p	GO:0000377	BP	RNA splicing, via transesterification reactions with bulged adenosine as nucleophile	Gene Ontology	6	42	0.000319537	0.00477126	220988|23524|57721|92797|23020|55660	http://amigo.geneontology.org/amigo/term/GO:0000377
hsa-miR-1301-3p	GO:0032446	BP	protein modification by small protein conjugation	Gene Ontology	11	152	0.000362038	0.00533759	114088|10274|11275|84541|3093|10477|57161|23411|25820|1499|26036	http://amigo.geneontology.org/amigo/term/GO:0032446
hsa-miR-1301-3p	GO:0045202	CC	synapse	Gene Ontology	10	128	0.000377809	0.0054916	308|114088|2059|1838|9810|55327|57120|323|3643|134957	http://amigo.geneontology.org/amigo/term/GO:0045202
hsa-miR-1301-3p	GO:0048713	BP	regulation of oligodendrocyte differentiation	Gene Ontology	3	5	0.000377974	0.0054916	4763|2475|6009	http://amigo.geneontology.org/amigo/term/GO:0048713
hsa-miR-1301-3p	GO:0051293	BP	establishment of spindle localization	Gene Ontology	3	5	0.000377974	0.0054916	10253|5080|1778	http://amigo.geneontology.org/amigo/term/GO:0051293
hsa-miR-1301-3p	GO:0032553	MF	ribonucleotide binding	Gene Ontology	16	292	0.000387367	0.00559326	4176|10061|1159|5165|9448|55278|9833|58477|149420|2665|7525|6950|6198|23405|26225|51202	http://amigo.geneontology.org/amigo/term/GO:0032553
hsa-miR-1301-3p	GO:0006996	BP	organelle organization	Gene Ontology	24	548	0.000401276	0.00575167	4899|54880|2475|4763|152273|8697|23243|8195|526|545|9937|7750|308|5108|23259|23022|8085|5245|6721|4836|23064|7182|54822|57606	http://amigo.geneontology.org/amigo/term/GO:0006996
hsa-miR-1301-3p	GO:0045893	BP	positive regulation of transcription, DNA-templated	Gene Ontology	14	236	0.000419005	0.005964	4303|5587|905|5324|11278|10138|5455|4331|10613|7046|65056|7525|9774|3643	http://amigo.geneontology.org/amigo/term/GO:0045893
hsa-miR-1301-3p	GO:0001067	MF	regulatory region nucleic acid binding	Gene Ontology	10	130	0.000423581	0.00600473	9355|10725|6498|2146|27161|2959|7552|25942|11278|4603	http://amigo.geneontology.org/amigo/term/GO:0001067
hsa-miR-1301-3p	GO:0045786	BP	negative regulation of cell cycle	Gene Ontology	8	84	0.000427938	0.00604204	1982|84101|6009|55835|4848|83990|10116|4853	http://amigo.geneontology.org/amigo/term/GO:0045786
hsa-miR-1301-3p	GO:0045184	BP	establishment of protein localization	Gene Ontology	16	295	0.000430626	0.00605558	9887|3181|22820|1213|26985|7037|85465|3320|7353|51729|7514|23061|9181|9776|10311|134957	http://amigo.geneontology.org/amigo/term/GO:0045184
hsa-miR-1301-3p	GO:0048856	BP	anatomical structure development	Gene Ontology	33	868	0.000436602	0.00611505	2734|4899|10890|3614|2650|57448|3320|152273|3064|10253|2821|57492|1948|2059|4289|3344|253558|3977|55740|26019|2290|55723|84668|200734|4810|387|3643|8473|7336|9394|7275|3221|55585	http://amigo.geneontology.org/amigo/term/GO:0048856
hsa-miR-1301-3p	GO:0007049	BP	cell cycle	Gene Ontology	15	266	0.000438927	0.00612311	4176|56475|57448|6498|10664|5108|55835|403|148479|83990|9212|10253|131405|283431|23141	http://amigo.geneontology.org/amigo/term/GO:0007049
hsa-miR-1301-3p	GO:1902533	BP	positive regulation of intracellular signal transduction	Gene Ontology	10	131	0.00044814	0.0062145	10333|142679|5587|6498|2146|7046|9043|10253|4853|10125	http://amigo.geneontology.org/amigo/term/GO:1902533
hsa-miR-1301-3p	GO:0051246	BP	regulation of protein metabolic process	Gene Ontology	19	390	0.000467486	0.00645286	51444|8473|5629|5245|54880|440590|2192|10125|9093|5795|285671|51755|84062|6198|9175|10425|5515|23141|8812	http://amigo.geneontology.org/amigo/term/GO:0051246
hsa-miR-1301-3p	GO:0006793	BP	phosphorus metabolic process	Gene Ontology	22	488	0.000476731	0.00653336	2475|3614|145567|9181|2820|10125|5587|51719|8658|55313|5921|545|50640|8732|9462|5128|10114|8473|7443|51231|81611|23141	http://amigo.geneontology.org/amigo/term/GO:0006793
hsa-miR-1301-3p	GO:1902494	CC	catalytic complex	Gene Ontology	12	184	0.000482425	0.00658561	5515|90637|2475|54800|9810|25897|51719|80314|192670|3703|9776|3643	http://amigo.geneontology.org/amigo/term/GO:1902494
hsa-miR-1301-3p	GO:0016569	BP	covalent chromatin modification	Gene Ontology	7	65	0.000495087	0.00666361	5587|5245|79813|23411|339287|55689|51317	http://amigo.geneontology.org/amigo/term/GO:0016569
hsa-miR-1301-3p	GO:0017111	MF	nucleoside-triphosphatase activity	Gene Ontology	13	212	0.000495751	0.00666361	3667|1983|3815|54206|9181|3843|5985|25782|4763|92797|9743|10253|54921	http://amigo.geneontology.org/amigo/term/GO:0017111
hsa-miR-1301-3p	GO:0005764	CC	lysosome	Gene Ontology	8	86	0.000494783	0.00666361	130340|3920|2624|89781|26985|526|23250|824	http://amigo.geneontology.org/amigo/term/GO:0005764
hsa-miR-1301-3p	GO:0043066	BP	negative regulation of apoptotic process	Gene Ontology	11	159	0.00051674	0.00686666	627|57448|55179|23411|3064|9212|6480|25942|51616|55023|5329	http://amigo.geneontology.org/amigo/term/GO:0043066
hsa-miR-1301-3p	GO:0048522	BP	positive regulation of cellular process	Gene Ontology	30	768	0.000514839	0.00686666	10274|627|9181|10236|3064|6925|9774|51479|7203|9833|11113|9810|27161|3977|545|25778|25942|23054|10787|387|3643|90637|51231|51379|55127|57650|5795|7525|6198|2534	http://amigo.geneontology.org/amigo/term/GO:0048522
hsa-miR-1301-3p	GO:0004842	MF	ubiquitin-protein transferase activity	Gene Ontology	8	87	0.000531241	0.00700618	91947|5080|54880|57448|60468|152006|10477|131405	http://amigo.geneontology.org/amigo/term/GO:0004842
hsa-miR-1301-3p	GO:0005524	MF	ATP binding	Gene Ontology	14	242	0.000530227	0.00700618	3798|9448|3643|3093|1456|9031|9044|23020|6198|25778|23438|490|9175|1660	http://amigo.geneontology.org/amigo/term/GO:0005524
hsa-miR-1301-3p	GO:0016570	BP	histone modification	Gene Ontology	7	66	0.000538556	0.00707599	8085|64769|79813|10664|23411|5587|55689	http://amigo.geneontology.org/amigo/term/GO:0016570
hsa-miR-1301-3p	GO:0070585	BP	protein localization to mitochondrion	Gene Ontology	5	30	0.000541999	0.00709462	89781|7534|9776|51729|57602	http://amigo.geneontology.org/amigo/term/GO:0070585
hsa-miR-1301-3p	GO:0044255	BP	cellular lipid metabolic process	Gene Ontology	12	188	0.000577451	0.00751652	3815|9110|9373|55627|166929|116150|23054|50640|25942|2820|85365|5329	http://amigo.geneontology.org/amigo/term/GO:0044255
hsa-miR-1301-3p	GO:0010628	BP	positive regulation of gene expression	Gene Ontology	15	275	0.000608205	0.00781827	10274|10138|2296|55827|5530|9031|55023|23185|7525|6925|1499|1386|7182|8473|64710	http://amigo.geneontology.org/amigo/term/GO:0010628
hsa-miR-1301-3p	GO:0051254	BP	positive regulation of RNA metabolic process	Gene Ontology	13	217	0.000609204	0.00781827	3643|2308|29883|905|8878|5080|4331|27161|1871|7182|131405|4782|8473	http://amigo.geneontology.org/amigo/term/GO:0051254
hsa-miR-1301-3p	GO:0071902	BP	positive regulation of protein serine/threonine kinase activity	Gene Ontology	6	48	0.000609618	0.00781827	10333|84962|6788|51719|387|10253	http://amigo.geneontology.org/amigo/term/GO:0071902
hsa-miR-1301-3p	GO:0008047	MF	enzyme activator activity	Gene Ontology	8	89	0.000610681	0.00781827	54206|9373|2192|5921|394|8837|483|23236	http://amigo.geneontology.org/amigo/term/GO:0008047
hsa-miR-1301-3p	GO:0140097	MF	catalytic activity, acting on DNA	Gene Ontology	5	31	0.000619456	0.00790173	23064|8658|23405|23411|92797	http://amigo.geneontology.org/amigo/term/GO:0140097
hsa-miR-1301-3p	GO:0034613	BP	cellular protein localization	Gene Ontology	14	247	0.000641199	0.00810527	11260|84962|55726|2339|10890|9093|5108|7514|7534|26985|10768|9776|483|10425	http://amigo.geneontology.org/amigo/term/GO:0034613
hsa-miR-1301-3p	GO:0046907	BP	intracellular transport	Gene Ontology	14	247	0.000641199	0.00810527	23325|6218|9276|2624|10890|6396|57120|11260|7514|54812|6228|9776|27072|26019	http://amigo.geneontology.org/amigo/term/GO:0046907
hsa-miR-1301-3p	GO:0061024	BP	membrane organization	Gene Ontology	8	90	0.000653847	0.00823542	7443|5018|2339|55704|23061|387|7534|137886	http://amigo.geneontology.org/amigo/term/GO:0061024
hsa-miR-1301-3p	GO:0036464	CC	cytoplasmic ribonucleoprotein granule	Gene Ontology	5	32	0.000704916	0.00879951	192670|27161|9125|23185|1660	http://amigo.geneontology.org/amigo/term/GO:0036464
hsa-miR-1301-3p	GO:0044093	BP	positive regulation of molecular function	Gene Ontology	14	250	0.000716786	0.0089159	23786|142|905|54206|9181|2146|2192|7046|23411|5921|387|1499|23236|8812	http://amigo.geneontology.org/amigo/term/GO:0044093
hsa-miR-1301-3p	GO:0005694	CC	chromosome	Gene Ontology	10	140	0.000727211	0.00901355	57492|51444|8658|5080|9212|699|6925|1386|25942|23236	http://amigo.geneontology.org/amigo/term/GO:0005694
hsa-miR-1301-3p	GO:0051179	BP	localization	Gene Ontology	33	896	0.000734921	0.00907699	10061|665|9093|10253|3069|8867|1948|5629|2059|85465|58477|55704|526|79183|10311|26052|26019|1139|94081|10282|10204|7046|23411|55789|8697|483|27072|84804|9887|5793|84230|116150|2534	http://amigo.geneontology.org/amigo/term/GO:0051179
hsa-miR-1301-3p	GO:0008610	BP	lipid biosynthetic process	Gene Ontology	8	92	0.00074756	0.00918449	3667|84962|5629|9444|10390|23259|23446|5329	http://amigo.geneontology.org/amigo/term/GO:0008610
hsa-miR-1301-3p	GO:2000026	BP	regulation of multicellular organismal development	Gene Ontology	15	282	0.000775699	0.0094638	2734|8867|1139|5708|2624|3815|85458|22846|4179|4763|7046|9181|26052|6198|5515	http://amigo.geneontology.org/amigo/term/GO:2000026
hsa-miR-1301-3p	GO:0046626	BP	regulation of insulin receptor signaling pathway	Gene Ontology	3	7	0.000786773	0.00951601	6198|23411|64710	http://amigo.geneontology.org/amigo/term/GO:0046626
hsa-miR-1301-3p	GO:0048636	BP	positive regulation of muscle organ development	Gene Ontology	3	7	0.000786773	0.00951601	1499|1948|2475	http://amigo.geneontology.org/amigo/term/GO:0048636
hsa-miR-1301-3p	GO:0000082	BP	G1/S transition of mitotic cell cycle	Gene Ontology	5	33	0.000798886	0.00959623	23236|29883|4848|9125|4999	http://amigo.geneontology.org/amigo/term/GO:0000082
hsa-miR-1301-3p	GO:0007050	BP	cell cycle arrest	Gene Ontology	5	33	0.000798886	0.00959623	323|7046|29883|6498|4850	http://amigo.geneontology.org/amigo/term/GO:0007050
hsa-miR-1301-3p	GO:0051338	BP	regulation of transferase activity	Gene Ontology	10	142	0.000805494	0.00964252	5629|3815|51719|4331|5795|23411|51755|10114|23560|10125	http://amigo.geneontology.org/amigo/term/GO:0051338
hsa-miR-1301-3p	GO:0007005	BP	mitochondrion organization	Gene Ontology	9	117	0.000811311	0.0096462	284114|5018|8878|4580|5245|6721|7182|54927|1386	http://amigo.geneontology.org/amigo/term/GO:0007005
hsa-miR-1301-3p	GO:0043547	BP	positive regulation of GTPase activity	Gene Ontology	9	117	0.000811311	0.0096462	3667|1123|2146|2665|5921|9181|23236|2534|55789	http://amigo.geneontology.org/amigo/term/GO:0043547
hsa-miR-1301-3p	GO:0009967	BP	positive regulation of signal transduction	Gene Ontology	15	284	0.000830192	0.00980411	10333|2475|5708|8085|1123|6009|23411|55789|80351|627|9175|23236|4853|10125|5329	http://amigo.geneontology.org/amigo/term/GO:0009967
hsa-miR-1301-3p	GO:0015833	BP	peptide transport	Gene Ontology	15	284	0.000830192	0.00980411	10333|23325|8888|222068|285381|7353|665|5108|80381|473|526|23061|4170|5861|26019	http://amigo.geneontology.org/amigo/term/GO:0015833
hsa-miR-1301-3p	GO:0017076	MF	purine nucleotide binding	Gene Ontology	16	315	0.00083955	0.00988129	6334|7443|55278|3798|10295|51265|23560|5985|3320|403|26052|28976|6009|80273|57519|1983	http://amigo.geneontology.org/amigo/term/GO:0017076
hsa-miR-1301-3p	GO:0019901	MF	protein kinase binding	Gene Ontology	8	94	0.000851781	0.00997495	308|55704|22995|51444|1500|5784|200734|9776	http://amigo.geneontology.org/amigo/term/GO:0019901
hsa-miR-1301-3p	GO:0051252	BP	regulation of RNA metabolic process	Gene Ontology	24	582	0.000895469	0.0104169	5393|4899|10658|8621|6721|23405|342371|5784|55749|3181|29915|25942|58486|2624|2959|55689|23236|54807|84124|79813|10771|1386|5814|51317	http://amigo.geneontology.org/amigo/term/GO:0051252
hsa-miR-1301-3p	GO:0006518	BP	peptide metabolic process	Gene Ontology	9	119	0.000907806	0.0104907	2475|55278|4528|57721|246175|23185|10605|131405|6166	http://amigo.geneontology.org/amigo/term/GO:0006518
hsa-miR-1301-3p	GO:0006810	BP	transport	Gene Ontology	27	691	0.000955137	0.0110014	53373|220988|115123|25782|10123|23086|5587|10890|1778|5784|10311|200081|5861|10526|1139|10075|23054|57120|23250|483|9312|10425|4170|7275|84804|51729|6198	http://amigo.geneontology.org/amigo/term/GO:0006810
hsa-miR-1301-3p	GO:0044265	BP	cellular macromolecule catabolic process	Gene Ontology	11	173	0.000993882	0.0113728	51444|665|10605|27161|23014|9655|7534|1499|6218|23358|1660	http://amigo.geneontology.org/amigo/term/GO:0044265
hsa-miR-1301-3p	GO:0003007	BP	heart morphogenesis	Gene Ontology	5	35	0.00101445	0.0115328	9645|1499|7046|9031|200894	http://amigo.geneontology.org/amigo/term/GO:0003007
hsa-miR-1301-3p	GO:0033043	BP	regulation of organelle organization	Gene Ontology	12	203	0.00108529	0.0122585	114088|57551|8195|85458|665|2475|10664|6721|4848|7182|55023|5329	http://amigo.geneontology.org/amigo/term/GO:0033043
hsa-miR-1301-3p	GO:0003729	MF	mRNA binding	Gene Ontology	4	20	0.00109365	0.0122737	1478|9444|55692|3181	http://amigo.geneontology.org/amigo/term/GO:0003729
hsa-miR-1301-3p	GO:0010604	BP	positive regulation of macromolecule metabolic process	Gene Ontology	20	454	0.00110258	0.0123344	57492|55704|3667|142|9355|7203|57721|56919|1139|140609|55127|51499|25782|6721|10236|8878|6950|1499|10253|1660	http://amigo.geneontology.org/amigo/term/GO:0010604
hsa-miR-1301-3p	GO:0046578	BP	regulation of Ras protein signal transduction	Gene Ontology	5	36	0.0011371	0.0126801	8878|4763|5921|8473|9462	http://amigo.geneontology.org/amigo/term/GO:0046578
hsa-miR-1301-3p	GO:0071705	BP	nitrogen compound transport	Gene Ontology	16	325	0.00114537	0.0127318	285381|27242|220988|10075|2665|1213|3839|55610|80381|3843|6535|10125|3064|3667|7534|8473	http://amigo.geneontology.org/amigo/term/GO:0071705
hsa-miR-1301-3p	GO:0048731	BP	system development	Gene Ontology	27	701	0.00116689	0.0129095	4303|2734|4899|627|84668|9093|9031|9657|5629|8195|5451|6009|5784|323|9355|94081|63973|23411|9043|5814|4179|80381|23405|116150|8837|55585|4853	http://amigo.geneontology.org/amigo/term/GO:0048731
hsa-miR-1301-3p	GO:0022607	BP	cellular component assembly	Gene Ontology	17	360	0.00125377	0.0138053	308|149371|607|29883|627|5629|23208|84105|51719|51133|8927|203547|23020|1499|5861|10125|24144	http://amigo.geneontology.org/amigo/term/GO:0022607
hsa-miR-1301-3p	GO:0006839	BP	mitochondrial transport	Gene Ontology	6	56	0.00127344	0.013956	89781|665|51729|57602|7534|10425	http://amigo.geneontology.org/amigo/term/GO:0006839
hsa-miR-1301-3p	GO:0007062	BP	sister chromatid cohesion	Gene Ontology	4	21	0.00128213	0.0140075	10664|55719|11004|55839	http://amigo.geneontology.org/amigo/term/GO:0007062
hsa-miR-1301-3p	GO:0031325	BP	positive regulation of cellular metabolic process	Gene Ontology	20	461	0.00131271	0.0142086	4303|8085|51719|10274|5629|2624|905|7203|25897|607|140609|65056|53373|5978|27161|5525|29915|6925|23236|6908	http://amigo.geneontology.org/amigo/term/GO:0031325
hsa-miR-1301-3p	GO:0070925	BP	organelle assembly	Gene Ontology	8	101	0.00131172	0.0142086	22995|9493|1778|246175|4848|3064|23019|9776	http://amigo.geneontology.org/amigo/term/GO:0070925
hsa-miR-1301-3p	GO:0019899	MF	enzyme binding	Gene Ontology	16	330	0.00133063	0.0143581	4303|7336|55719|51444|142|2339|54880|55835|4520|5784|3843|273|9972|5985|27072|11236	http://amigo.geneontology.org/amigo/term/GO:0019899
hsa-miR-1301-3p	GO:0043405	BP	regulation of MAP kinase activity	Gene Ontology	6	57	0.00138474	0.0148961	10333|84962|4763|5795|10253|5999	http://amigo.geneontology.org/amigo/term/GO:0043405
hsa-miR-1301-3p	GO:0008144	MF	drug binding	Gene Ontology	15	300	0.0013948	0.0149127	140809|5587|2475|3798|10295|9833|23347|10592|3093|1456|55300|6788|9175|3643|10114	http://amigo.geneontology.org/amigo/term/GO:0008144
hsa-miR-1301-3p	GO:0030155	BP	regulation of cell adhesion	Gene Ontology	8	102	0.00139103	0.0149127	27242|4814|80381|23308|9655|6480|149041|23560	http://amigo.geneontology.org/amigo/term/GO:0030155
hsa-miR-1301-3p	GO:0042981	BP	regulation of apoptotic process	Gene Ontology	12	210	0.00142598	0.0151535	2475|10114|8878|3572|5978|23411|3977|9181|8837|6198|10253|55023	http://amigo.geneontology.org/amigo/term/GO:0042981
hsa-miR-1301-3p	GO:1901566	BP	organonitrogen compound biosynthetic process	Gene Ontology	15	301	0.0014388	0.0152434	10330|55278|85365|57721|2475|5329|1937|25782|27161|192670|1499|6480|10797|11236|10236	http://amigo.geneontology.org/amigo/term/GO:1901566
hsa-miR-1301-3p	GO:0042221	BP	response to chemical	Gene Ontology	26	676	0.00145369	0.0153548	2296|7799|2098|5708|8195|3843|4848|11236|85365|23054|8204|7353|10560|824|51366|8473|7275|79876|1604|149041|2146|5795|5530|84062|6198|55023	http://amigo.geneontology.org/amigo/term/GO:0042221
hsa-miR-1301-3p	GO:0006475	BP	internal protein amino acid acetylation	Gene Ontology	4	22	0.00149219	0.0156434	23411|55689|9767|339287	http://amigo.geneontology.org/amigo/term/GO:0006475
hsa-miR-1301-3p	GO:0035770	CC	ribonucleoprotein granule	Gene Ontology	4	22	0.00149219	0.0156434	23019|29883|9125|3064	http://amigo.geneontology.org/amigo/term/GO:0035770
hsa-miR-1301-3p	GO:0005924	CC	cell-substrate adherens junction	Gene Ontology	6	58	0.00150331	0.015713	308|84962|55740|1499|9493|6218	http://amigo.geneontology.org/amigo/term/GO:0005924
hsa-miR-1301-3p	GO:0006796	BP	phosphate-containing compound metabolic process	Gene Ontology	20	468	0.00155612	0.0161925	10333|4176|84962|8867|5629|152559|5245|5999|140838|79871|140609|149420|9583|57223|57161|51755|1139|5515|9749|23236	http://amigo.geneontology.org/amigo/term/GO:0006796
hsa-miR-1301-3p	GO:0022603	BP	regulation of anatomical structure morphogenesis	Gene Ontology	10	156	0.00156961	0.0162363	3239|8650|1123|2534|387|1499|8837|121512|55023|55660	http://amigo.geneontology.org/amigo/term/GO:0022603
hsa-miR-1301-3p	GO:0043565	MF	sequence-specific DNA binding	Gene Ontology	10	156	0.00156961	0.0162363	4303|58487|11004|5451|5080|10009|2146|10472|1386|26019	http://amigo.geneontology.org/amigo/term/GO:0043565
hsa-miR-1301-3p	GO:0019787	MF	ubiquitin-like protein transferase activity	Gene Ontology	7	81	0.00163573	0.0167471	51366|11236|9810|3093|285671|131405|3652	http://amigo.geneontology.org/amigo/term/GO:0019787
hsa-miR-1301-3p	GO:0019903	MF	protein phosphatase binding	Gene Ontology	4	23	0.00172506	0.017559	3320|9887|3643|23141	http://amigo.geneontology.org/amigo/term/GO:0019903
hsa-miR-1301-3p	GO:0007568	BP	aging	Gene Ontology	5	40	0.00173966	0.0175798	2290|7799|2475|493856|9093	http://amigo.geneontology.org/amigo/term/GO:0007568
hsa-miR-1301-3p	GO:0005794	CC	Golgi apparatus	Gene Ontology	12	216	0.00178416	0.0177592	152559|607|2526|25844|5587|56623|8927|390|29914|26985|79174|6480	http://amigo.geneontology.org/amigo/term/GO:0005794
hsa-miR-1301-3p	GO:0044248	BP	cellular catabolic process	Gene Ontology	15	308	0.00178052	0.0177592	3643|308|84640|57721|5515|9810|7353|149041|9887|6721|29883|57602|5861|7514|26019	http://amigo.geneontology.org/amigo/term/GO:0044248
hsa-miR-1301-3p	GO:0045892	BP	negative regulation of transcription, DNA-templated	Gene Ontology	11	187	0.00178778	0.0177592	5629|2624|8204|54880|56257|4774|10771|23019|1499|25942|4782	http://amigo.geneontology.org/amigo/term/GO:0045892
hsa-miR-1301-3p	GO:0000288	BP	nuclear-transcribed mRNA catabolic process, deadenylation-dependent decay	Gene Ontology	3	10	0.00179545	0.0177592	80153|4848|149041	http://amigo.geneontology.org/amigo/term/GO:0000288
hsa-miR-1301-3p	GO:0000932	CC	P-body	Gene Ontology	3	10	0.00179545	0.0177592	131405|27161|192670	http://amigo.geneontology.org/amigo/term/GO:0000932
hsa-miR-1301-3p	GO:0072666	BP	establishment of protein localization to vacuole	Gene Ontology	3	10	0.00179545	0.0177592	26985|27072|55187	http://amigo.geneontology.org/amigo/term/GO:0072666
hsa-miR-1301-3p	GO:0005783	CC	endoplasmic reticulum	Gene Ontology	11	188	0.00186007	0.0182921	49855|9900|286451|8878|10890|1937|10236|79174|6480|51141|23193	http://amigo.geneontology.org/amigo/term/GO:0005783
hsa-miR-1301-3p	GO:0006412	BP	translation	Gene Ontology	7	83	0.00186238	0.0182921	2475|1983|9444|9801|27161|10236|131405	http://amigo.geneontology.org/amigo/term/GO:0006412
hsa-miR-1301-3p	GO:0045787	BP	positive regulation of cell cycle	Gene Ontology	6	61	0.00190568	0.018665	4303|84967|5629|905|51379|4850	http://amigo.geneontology.org/amigo/term/GO:0045787
hsa-miR-1301-3p	GO:0019941	BP	modification-dependent protein catabolic process	Gene Ontology	7	84	0.00198447	0.0191951	51366|8878|130507|3093|23014|84101|11236	http://amigo.geneontology.org/amigo/term/GO:0019941
hsa-miR-1301-3p	GO:0000910	BP	cytokinesis	Gene Ontology	4	24	0.00198199	0.0191951	11113|9493|5921|55660	http://amigo.geneontology.org/amigo/term/GO:0000910
hsa-miR-1301-3p	GO:0008286	BP	insulin receptor signaling pathway	Gene Ontology	4	24	0.00198199	0.0191951	6198|526|3643|55023	http://amigo.geneontology.org/amigo/term/GO:0008286
hsa-miR-1301-3p	GO:0005096	MF	GTPase activator activity	Gene Ontology	5	42	0.00211594	0.0203264	54206|134957|394|23061|9462	http://amigo.geneontology.org/amigo/term/GO:0005096
hsa-miR-1301-3p	GO:0005576	CC	extracellular region	Gene Ontology	27	736	0.00225955	0.0214123	214|627|8621|3320|9657|5768|7037|3550|2059|1778|23019|5861|54996|57551|9373|4190|55187|26052|118429|9043|483|3920|7336|196792|5793|4853|254048	http://amigo.geneontology.org/amigo/term/GO:0005576
hsa-miR-1301-3p	GO:0009968	BP	negative regulation of signal transduction	Gene Ontology	11	193	0.00225809	0.0214123	4170|142679|6788|143686|3572|5795|4848|5921|23019|6198|51499	http://amigo.geneontology.org/amigo/term/GO:0009968
hsa-miR-1301-3p	GO:0005975	BP	carbohydrate metabolic process	Gene Ontology	7	86	0.00224714	0.0214123	3628|5165|56623|57223|140838|2821|23193	http://amigo.geneontology.org/amigo/term/GO:0005975
hsa-miR-1301-3p	GO:0006977	BP	DNA damage response, signal transduction by p53 class mediator resulting in cell cycle arrest	Gene Ontology	3	11	0.00225234	0.0214123	29883|9125|246175	http://amigo.geneontology.org/amigo/term/GO:0006977
hsa-miR-1301-3p	GO:0061919	BP	process utilizing autophagic mechanism	Gene Ontology	8	111	0.00228944	0.0216078	2308|3920|665|2475|3320|526|7182|9776	http://amigo.geneontology.org/amigo/term/GO:0061919
hsa-miR-1301-3p	GO:0008654	BP	phospholipid biosynthetic process	Gene Ontology	5	43	0.00232482	0.0218827	9110|23259|166929|84962|85465	http://amigo.geneontology.org/amigo/term/GO:0008654
hsa-miR-1301-3p	GO:0050790	BP	regulation of catalytic activity	Gene Ontology	16	351	0.00240814	0.0225156	91947|84962|152273|3815|5018|440590|9093|2821|5795|2665|5921|51755|5999|9749|10125|55789	http://amigo.geneontology.org/amigo/term/GO:0050790
hsa-miR-1301-3p	GO:0097367	MF	carbohydrate derivative binding	Gene Ontology	16	351	0.00240814	0.0225156	140809|4176|51231|3815|6788|11113|140609|55300|26052|390|7525|6950|56919|9493|26225|2534	http://amigo.geneontology.org/amigo/term/GO:0097367
hsa-miR-1301-3p	GO:0033218	MF	amide binding	Gene Ontology	5	44	0.0025483	0.0237311	100528062|3106|26953|1139|10455	http://amigo.geneontology.org/amigo/term/GO:0033218
hsa-miR-1301-3p	GO:1904951	BP	positive regulation of establishment of protein localization	Gene Ontology	6	65	0.0025628	0.0237398	89781|85465|80381|56910|57602|9776	http://amigo.geneontology.org/amigo/term/GO:1904951
hsa-miR-1301-3p	GO:0017137	MF	Rab GTPase binding	Gene Ontology	4	26	0.00257288	0.0237703	57553|26985|23061|134957	http://amigo.geneontology.org/amigo/term/GO:0017137
hsa-miR-1301-3p	GO:0031410	CC	cytoplasmic vesicle	Gene Ontology	14	289	0.0026089	0.0240396	114088|1315|9900|9110|23250|3920|9583|7046|152273|8674|23193|3643|8473|134957	http://amigo.geneontology.org/amigo/term/GO:0031410
hsa-miR-1301-3p	GO:0051704	BP	multi-organism process	Gene Ontology	19	456	0.00263259	0.0241942	308|130340|55723|10787|100507436|8195|7203|665|5707|130507|4179|4190|51000|23411|2296|9043|1499|1604|6908	http://amigo.geneontology.org/amigo/term/GO:0051704
hsa-miR-1301-3p	GO:0098797	CC	plasma membrane protein complex	Gene Ontology	7	89	0.00269047	0.0245971	1213|214|10061|3667|6334|1139|134957	http://amigo.geneontology.org/amigo/term/GO:0098797
hsa-miR-1301-3p	GO:0042578	MF	phosphoric ester hydrolase activity	Gene Ontology	7	89	0.00269047	0.0245971	3628|142679|81611|56623|5784|23035|8732	http://amigo.geneontology.org/amigo/term/GO:0042578
hsa-miR-1301-3p	GO:0045944	BP	positive regulation of transcription by RNA polymerase II	Gene Ontology	10	169	0.00272659	0.0248301	4303|80034|4899|8658|3239|23064|473|1386|55023|64710	http://amigo.geneontology.org/amigo/term/GO:0045944
hsa-miR-1301-3p	GO:0001216	MF	DNA-binding transcription activator activity	Gene Ontology	3	12	0.00277508	0.0250115	10664|5978|2296	http://amigo.geneontology.org/amigo/term/GO:0001216
hsa-miR-1301-3p	GO:0001541	BP	ovarian follicle development	Gene Ontology	3	12	0.00277508	0.0250115	23054|2296|3815	http://amigo.geneontology.org/amigo/term/GO:0001541
hsa-miR-1301-3p	GO:1990234	CC	transferase complex	Gene Ontology	8	115	0.00281168	0.0252439	2339|440590|79871|23411|23014|57721|10445|55689	http://amigo.geneontology.org/amigo/term/GO:1990234
hsa-miR-1301-3p	GO:0010243	BP	response to organonitrogen compound	Gene Ontology	9	142	0.00284342	0.0254635	4899|142|54206|2650|9810|3843|55023|2534|8473	http://amigo.geneontology.org/amigo/term/GO:0010243
hsa-miR-1301-3p	GO:0023051	BP	regulation of signaling	Gene Ontology	20	495	0.00288604	0.0257793	3643|8085|84962|222068|2308|50484|6788|79876|11215|57568|11073|2146|9031|9743|4952|9774|10253|79813|490|5245	http://amigo.geneontology.org/amigo/term/GO:0023051
hsa-miR-1301-3p	GO:0022618	BP	ribonucleoprotein complex assembly	Gene Ontology	4	27	0.00290924	0.0258546	23064|23405|10658|6218	http://amigo.geneontology.org/amigo/term/GO:0022618
hsa-miR-1301-3p	GO:1903362	BP	regulation of cellular protein catabolic process	Gene Ontology	4	27	0.00290924	0.0258546	7336|285671|25820|10425	http://amigo.geneontology.org/amigo/term/GO:1903362
hsa-miR-1301-3p	GO:0007059	BP	chromosome segregation	Gene Ontology	6	67	0.00294889	0.0260417	55719|11004|10592|10615|148479|9493	http://amigo.geneontology.org/amigo/term/GO:0007059
hsa-miR-1301-3p	GO:0010605	BP	negative regulation of macromolecule metabolic process	Gene Ontology	18	427	0.00299207	0.0263565	24144|5245|2058|9444|4179|342371|6498|9887|473|2192|4848|10605|23019|545|54927|2821|8473|2117	http://amigo.geneontology.org/amigo/term/GO:0010605
hsa-miR-1301-3p	GO:0032501	BP	multicellular organismal process	Gene Ontology	36	1100	0.00304853	0.0266861	1143|214|64343|627|64412|7799|9031|23086|5357|3798|8195|2059|490|3106|3572|80314|5921|23236|7353|57492|1139|2624|55603|9825|200734|10787|10425|152006|9394|4154|286451|5108|23020|116150|7182|6198	http://amigo.geneontology.org/amigo/term/GO:0032501
hsa-miR-1301-3p	GO:0044389	MF	ubiquitin-like protein ligase binding	Gene Ontology	5	46	0.00304135	0.0266861	51528|6950|55719|7534|2308	http://amigo.geneontology.org/amigo/term/GO:0044389
hsa-miR-1301-3p	GO:0051640	BP	organelle localization	Gene Ontology	6	68	0.00315747	0.0273999	149371|3815|55726|8195|1778|10253	http://amigo.geneontology.org/amigo/term/GO:0051640
hsa-miR-1301-3p	GO:0050865	BP	regulation of cell activation	Gene Ontology	6	68	0.00315747	0.0273999	2475|9093|2534|9655|3572|10125	http://amigo.geneontology.org/amigo/term/GO:0050865
hsa-miR-1301-3p	GO:1901135	BP	carbohydrate derivative metabolic process	Gene Ontology	10	173	0.00319474	0.0276489	1213|79070|27087|2650|10418|9583|116150|23236|8473|1462	http://amigo.geneontology.org/amigo/term/GO:1901135
hsa-miR-1301-3p	GO:0016567	BP	protein ubiquitination	Gene Ontology	8	118	0.00326094	0.0281236	51366|84541|123879|11275|10477|7046|80311|51444	http://amigo.geneontology.org/amigo/term/GO:0016567
hsa-miR-1301-3p	GO:0045778	BP	positive regulation of ossification	Gene Ontology	3	13	0.00336659	0.0287866	56998|1499|5587	http://amigo.geneontology.org/amigo/term/GO:0045778
hsa-miR-1301-3p	GO:0048208	BP	COPII vesicle coating	Gene Ontology	3	13	0.00336659	0.0287866	10282|5861|23243	http://amigo.geneontology.org/amigo/term/GO:0048208
hsa-miR-1301-3p	GO:0031399	BP	regulation of protein modification process	Gene Ontology	12	235	0.00343399	0.0291848	10333|51366|2624|905|2339|55704|123879|6788|10116|2308|5999|8473	http://amigo.geneontology.org/amigo/term/GO:0031399
hsa-miR-1301-3p	GO:0046903	BP	secretion	Gene Ontology	10	175	0.00345166	0.0292639	10333|23086|23208|23054|2192|5978|5768|55585|5861|27072	http://amigo.geneontology.org/amigo/term/GO:0046903
hsa-miR-1301-3p	GO:0048513	BP	animal organ development	Gene Ontology	20	504	0.00350087	0.0296094	3643|2308|607|4810|1427|3815|9833|3106|8195|4179|2820|3988|5324|55692|9657|1499|80139|24144|5814|4814	http://amigo.geneontology.org/amigo/term/GO:0048513
hsa-miR-1301-3p	GO:0040007	BP	growth	Gene Ontology	9	147	0.00353104	0.0297926	5393|214|4814|3239|2296|23411|9655|80351|8837	http://amigo.geneontology.org/amigo/term/GO:0040007
hsa-miR-1301-3p	GO:0000226	BP	microtubule cytoskeleton organization	Gene Ontology	6	70	0.00360737	0.0302182	55726|140609|8658|9181|55142|283431	http://amigo.geneontology.org/amigo/term/GO:0000226
hsa-miR-1301-3p	GO:0008283	BP	cell population proliferation	Gene Ontology	15	333	0.00359963	0.0302182	55704|1139|149041|9833|9093|5784|2146|7046|8650|387|1033|1386|2117|6198|10771	http://amigo.geneontology.org/amigo/term/GO:0008283
hsa-miR-1301-3p	GO:0004707	MF	MAP kinase activity	Gene Ontology	5	48	0.00359971	0.0302182	9043|10333|10114|3643|3815	http://amigo.geneontology.org/amigo/term/GO:0004707
hsa-miR-1301-3p	GO:0008104	BP	protein localization	Gene Ontology	16	367	0.00364856	0.0304903	285381|55719|112936|11260|4836|51692|473|7353|5530|403|2534|545|80351|7514|8473|22820	http://amigo.geneontology.org/amigo/term/GO:0008104
hsa-miR-1301-3p	GO:0005886	CC	plasma membrane	Gene Ontology	26	726	0.00365782	0.0304949	253832|1139|10123|254428|9057|25844|81609|3572|1500|5921|200894|57553|1213|1315|10313|57120|483|9749|54805|9900|7275|4179|80381|5793|28977|84062	http://amigo.geneontology.org/amigo/term/GO:0005886
hsa-miR-1301-3p	GO:0006915	BP	apoptotic process	Gene Ontology	14	302	0.00379214	0.0314649	2308|284114|8878|50484|9833|2296|7046|23411|6788|10116|7534|121512|8473|5329	http://amigo.geneontology.org/amigo/term/GO:0006915
hsa-miR-1301-3p	GO:0008380	BP	RNA splicing	Gene Ontology	6	71	0.00384937	0.0317516	23064|23524|51692|9406|92797|3181	http://amigo.geneontology.org/amigo/term/GO:0008380
hsa-miR-1301-3p	GO:0006066	BP	alcohol metabolic process	Gene Ontology	5	49	0.00390483	0.0320956	4952|2224|51141|2820|3613	http://amigo.geneontology.org/amigo/term/GO:0006066
hsa-miR-1301-3p	GO:0005740	CC	mitochondrial envelope	Gene Ontology	8	122	0.00394439	0.032345	1159|54927|29914|28977|1386|65003|23446|4580	http://amigo.geneontology.org/amigo/term/GO:0005740
hsa-miR-1301-3p	GO:0010970	BP	transport along microtubule	Gene Ontology	3	14	0.00402955	0.0328127	403|10125|3064	http://amigo.geneontology.org/amigo/term/GO:0010970
hsa-miR-1301-3p	GO:1902807	BP	negative regulation of cell cycle G1/S phase transition	Gene Ontology	3	14	0.00402955	0.0328127	2146|4848|246175	http://amigo.geneontology.org/amigo/term/GO:1902807
hsa-miR-1301-3p	GO:0006473	BP	protein acetylation	Gene Ontology	4	30	0.00409604	0.0330467	25942|79903|2624|2308	http://amigo.geneontology.org/amigo/term/GO:0006473
hsa-miR-1301-3p	GO:0050658	BP	RNA transport	Gene Ontology	4	30	0.00409604	0.0330467	9887|220988|3181|3064	http://amigo.geneontology.org/amigo/term/GO:0050658
hsa-miR-1301-3p	GO:0070382	CC	exocytic vesicle	Gene Ontology	4	30	0.00409604	0.0330467	23208|84062|273|9900	http://amigo.geneontology.org/amigo/term/GO:0070382
hsa-miR-1301-3p	GO:0006913	BP	nucleocytoplasmic transport	Gene Ontology	5	50	0.00422799	0.0338384	3841|473|5530|26953|9887	http://amigo.geneontology.org/amigo/term/GO:0006913
hsa-miR-1301-3p	GO:0032984	BP	protein-containing complex disassembly	Gene Ontology	5	50	0.00422799	0.0338384	9645|2059|830|28977|57553	http://amigo.geneontology.org/amigo/term/GO:0032984
hsa-miR-1301-3p	GO:0009653	BP	anatomical structure morphogenesis	Gene Ontology	16	375	0.00444244	0.0354333	1123|5708|3798|1427|54206|57688|55327|51141|1456|7046|5921|387|23405|5707|23259|200894	http://amigo.geneontology.org/amigo/term/GO:0009653
hsa-miR-1301-3p	GO:0070062	CC	extracellular exosome	Gene Ontology	18	445	0.00450588	0.0358576	5393|214|27101|526|7203|23446|3106|3920|55187|9317|10204|55233|10787|9657|5795|23013|490|23193	http://amigo.geneontology.org/amigo/term/GO:0070062
hsa-miR-1301-3p	GO:0009725	BP	response to hormone	Gene Ontology	9	153	0.00452138	0.0358587	8085|2650|5978|2534|7182|64710|490|8473|23236	http://amigo.geneontology.org/amigo/term/GO:0009725
hsa-miR-1301-3p	GO:0001505	BP	regulation of neurotransmitter levels	Gene Ontology	5	51	0.00456978	0.0359979	3320|23446|114088|3643|23208	http://amigo.geneontology.org/amigo/term/GO:0001505
hsa-miR-1301-3p	GO:0007548	BP	sex differentiation	Gene Ontology	5	51	0.00456978	0.0359979	152006|8204|3239|9125|3815	http://amigo.geneontology.org/amigo/term/GO:0007548
hsa-miR-1301-3p	GO:0033554	BP	cellular response to stress	Gene Ontology	14	309	0.00459107	0.0360844	4303|29883|142|665|7071|58477|9972|83990|84062|23019|84962|7528|79876|10125	http://amigo.geneontology.org/amigo/term/GO:0033554
hsa-miR-1301-3p	GO:0065008	BP	regulation of biological quality	Gene Ontology	21	554	0.00464837	0.036453	5393|2308|308|7037|7275|55187|23054|23395|483|55327|55603|1604|8658|440193|3064|26052|84062|490|5245|8473|55660	http://amigo.geneontology.org/amigo/term/GO:0065008
hsa-miR-1301-3p	GO:0007420	BP	brain development	Gene Ontology	7	99	0.00466471	0.0364587	9355|8195|5080|5455|387|23035|200894	http://amigo.geneontology.org/amigo/term/GO:0007420
hsa-miR-1301-3p	GO:0005768	CC	endosome	Gene Ontology	8	126	0.0047334	0.0366399	149371|3920|9110|9743|57448|152273|8878|5861	http://amigo.geneontology.org/amigo/term/GO:0005768
hsa-miR-1301-3p	GO:0071482	BP	cellular response to light stimulus	Gene Ontology	3	15	0.00476638	0.0366399	2339|7528|4836	http://amigo.geneontology.org/amigo/term/GO:0071482
hsa-miR-1301-3p	GO:0140053	BP	mitochondrial gene expression	Gene Ontology	3	15	0.00476638	0.0366399	55278|9801|4528	http://amigo.geneontology.org/amigo/term/GO:0140053
hsa-miR-1301-3p	GO:1902652	BP	secondary alcohol metabolic process	Gene Ontology	3	15	0.00476638	0.0366399	6721|51141|10613	http://amigo.geneontology.org/amigo/term/GO:1902652
hsa-miR-1301-3p	GO:0140110	MF	transcription regulator activity	Gene Ontology	13	278	0.00482523	0.0370111	80034|1831|10725|6788|5080|3221|3344|5784|285550|5324|5530|23411|862	http://amigo.geneontology.org/amigo/term/GO:0140110
hsa-miR-1301-3p	GO:0003690	MF	double-stranded DNA binding	Gene Ontology	8	127	0.00494832	0.0376255	10725|63973|4520|23064|6721|5978|1386|25942	http://amigo.geneontology.org/amigo/term/GO:0003690
hsa-miR-1301-3p	GO:0030659	CC	cytoplasmic vesicle membrane	Gene Ontology	6	75	0.00493895	0.0376255	1315|8992|23208|6721|134957|22820	http://amigo.geneontology.org/amigo/term/GO:0030659
hsa-miR-1301-3p	GO:0120031	BP	plasma membrane bounded cell projection assembly	Gene Ontology	5	52	0.00493076	0.0376255	26052|121512|2475|84962|5108	http://amigo.geneontology.org/amigo/term/GO:0120031
hsa-miR-1301-3p	GO:1901987	BP	regulation of cell cycle phase transition	Gene Ontology	5	52	0.00493076	0.0376255	84101|8697|55835|9125|23236	http://amigo.geneontology.org/amigo/term/GO:1901987
hsa-miR-1301-3p	GO:0004721	MF	phosphoprotein phosphatase activity	Gene Ontology	4	32	0.00504652	0.0382062	55313|5793|79871|160760	http://amigo.geneontology.org/amigo/term/GO:0004721
hsa-miR-1301-3p	GO:0007093	BP	mitotic cell cycle checkpoint	Gene Ontology	4	32	0.00504652	0.0382062	4303|23019|51499|246175	http://amigo.geneontology.org/amigo/term/GO:0007093
hsa-miR-1301-3p	GO:0016462	MF	pyrophosphatase activity	Gene Ontology	12	248	0.00514846	0.038852	203547|84962|84515|8195|387|9093|273|390|9743|26052|403|8732	http://amigo.geneontology.org/amigo/term/GO:0016462
hsa-miR-1301-3p	GO:0060341	BP	regulation of cellular localization	Gene Ontology	7	101	0.00516438	0.0388883	3843|5784|6721|1499|25942|5108|10425	http://amigo.geneontology.org/amigo/term/GO:0060341
hsa-miR-1301-3p	GO:0010558	BP	negative regulation of macromolecule biosynthetic process	Gene Ontology	11	217	0.00523463	0.0393327	2290|5629|5451|862|149041|4774|3224|25942|5814|4782|9044	http://amigo.geneontology.org/amigo/term/GO:0010558
hsa-miR-1301-3p	GO:0006650	BP	glycerophospholipid metabolic process	Gene Ontology	5	53	0.0053115	0.0397823	4952|55300|3613|84962|2534	http://amigo.geneontology.org/amigo/term/GO:0006650
hsa-miR-1301-3p	GO:0006629	BP	lipid metabolic process	Gene Ontology	11	218	0.00540539	0.040356	5160|25942|84962|3815|2820|85465|10613|5978|3988|51141|5515	http://amigo.geneontology.org/amigo/term/GO:0006629
hsa-miR-1301-3p	GO:0044283	BP	small molecule biosynthetic process	Gene Ontology	7	102	0.00542878	0.0404014	57486|2224|10613|116150|10797|2820|1462	http://amigo.geneontology.org/amigo/term/GO:0044283
hsa-miR-1301-3p	GO:0006928	BP	movement of cell or subcellular component	Gene Ontology	12	250	0.00546401	0.0405774	830|2624|9355|323|55726|473|2192|80139|4354|23236|5861|22820	http://amigo.geneontology.org/amigo/term/GO:0006928
hsa-miR-1301-3p	GO:0034061	MF	DNA polymerase activity	Gene Ontology	3	16	0.0055793	0.0408363	9212|8658|6950	http://amigo.geneontology.org/amigo/term/GO:0034061
hsa-miR-1301-3p	GO:0001046	MF	core promoter sequence-specific DNA binding	Gene Ontology	3	16	0.0055793	0.0408363	5629|7071|2624	http://amigo.geneontology.org/amigo/term/GO:0001046
hsa-miR-1301-3p	GO:0006029	BP	proteoglycan metabolic process	Gene Ontology	3	16	0.0055793	0.0408363	27087|9394|1462	http://amigo.geneontology.org/amigo/term/GO:0006029
hsa-miR-1301-3p	GO:0016441	BP	posttranscriptional gene silencing	Gene Ontology	3	16	0.0055793	0.0408363	84962|192670|10658	http://amigo.geneontology.org/amigo/term/GO:0016441
hsa-miR-1301-3p	GO:0032436	BP	positive regulation of proteasomal ubiquitin-dependent protein catabolic process	Gene Ontology	3	16	0.0055793	0.0408363	7336|51444|9655	http://amigo.geneontology.org/amigo/term/GO:0032436
hsa-miR-1301-3p	GO:0097730	CC	non-motile cilium	Gene Ontology	3	16	0.0055793	0.0408363	4952|23035|9657	http://amigo.geneontology.org/amigo/term/GO:0097730
hsa-miR-1301-3p	GO:0035295	BP	tube development	Gene Ontology	9	159	0.00571561	0.0415643	1948|38|8195|6788|3239|5455|2296|7798|5921	http://amigo.geneontology.org/amigo/term/GO:0035295
hsa-miR-1301-3p	GO:0060249	BP	anatomical structure homeostasis	Gene Ontology	5	54	0.00571255	0.0415643	1499|3920|7037|8658|10445	http://amigo.geneontology.org/amigo/term/GO:0060249
hsa-miR-1301-3p	GO:0098542	BP	defense response to other organism	Gene Ontology	9	159	0.00571561	0.0415643	51279|665|1604|4190|9093|3093|10906|9469|2534	http://amigo.geneontology.org/amigo/term/GO:0098542
hsa-miR-1301-3p	GO:0032504	BP	multicellular organism reproduction	Gene Ontology	8	131	0.00588354	0.0426968	2475|10658|3815|9444|55723|23064|23411|6908	http://amigo.geneontology.org/amigo/term/GO:0032504
hsa-miR-1301-3p	GO:0043169	MF	cation binding	Gene Ontology	23	641	0.00590317	0.0427507	1123|2820|5587|11113|7071|9813|153830|26136|26036|284309|1462|223082|163087|7046|11278|54807|10771|8878|22847|164832|56888|5978|285671	http://amigo.geneontology.org/amigo/term/GO:0043169
hsa-miR-1301-3p	GO:0016788	MF	hydrolase activity, acting on ester bonds	Gene Ontology	8	132	0.00613703	0.0441249	29883|9937|79871|246175|55313|5793|8732|2098	http://amigo.geneontology.org/amigo/term/GO:0016788
hsa-miR-1301-3p	GO:0045017	BP	glycerolipid biosynthetic process	Gene Ontology	4	34	0.00613441	0.0441249	10390|9110|253558|23446	http://amigo.geneontology.org/amigo/term/GO:0045017
hsa-miR-1301-3p	GO:0009966	BP	regulation of signal transduction	Gene Ontology	17	424	0.00615183	0.0441407	56998|152559|2475|10114|64769|50484|2339|6498|5985|1500|545|9212|8837|149041|26036|10125|64710	http://amigo.geneontology.org/amigo/term/GO:0009966
hsa-miR-1301-3p	GO:0051716	BP	cellular response to stimulus	Gene Ontology	35	1113	0.00621934	0.0445338	214|64343|4354|390|92797|2821|5708|23190|29914|545|25778|6788|10333|55608|9110|200734|7046|23411|55789|9212|1499|5515|51231|8992|8878|149041|3093|5795|9031|80139|2339|7528|51141|26225|2534	http://amigo.geneontology.org/amigo/term/GO:0051716
hsa-miR-1301-3p	GO:0000228	CC	nuclear chromosome	Gene Ontology	6	79	0.00623942	0.0445864	5393|11073|10592|6950|80351|9937	http://amigo.geneontology.org/amigo/term/GO:0000228
hsa-miR-1301-3p	GO:0030163	BP	protein catabolic process	Gene Ontology	7	105	0.00628296	0.0448061	2308|2475|5708|130507|3320|23411|285671	http://amigo.geneontology.org/amigo/term/GO:0030163
hsa-miR-1301-3p	GO:0010906	BP	regulation of glucose metabolic process	Gene Ontology	3	17	0.0064703	0.0458618	57223|23411|3667	http://amigo.geneontology.org/amigo/term/GO:0010906
hsa-miR-1301-3p	GO:0012501	BP	programmed cell death	Gene Ontology	13	289	0.00652574	0.0461614	5515|23786|4170|6788|665|4331|23064|5921|9212|6198|4836|4853|51499	http://amigo.geneontology.org/amigo/term/GO:0012501
hsa-miR-1301-3p	GO:0010562	BP	positive regulation of phosphorus metabolic process	Gene Ontology	9	163	0.00663785	0.0467184	84962|142679|5629|51719|23411|9175|23236|23141|5329	http://amigo.geneontology.org/amigo/term/GO:0010562
hsa-miR-1301-3p	GO:2001234	BP	negative regulation of apoptotic signaling pathway	Gene Ontology	4	35	0.00673241	0.047147	51616|57448|2534|5329	http://amigo.geneontology.org/amigo/term/GO:2001234
hsa-miR-1301-3p	GO:0046983	MF	protein dimerization activity	Gene Ontology	10	194	0.00679862	0.0475157	114088|89781|665|10592|23208|1386|51616|7182|10125|23236	http://amigo.geneontology.org/amigo/term/GO:0046983
hsa-miR-1301-3p	GO:0010720	BP	positive regulation of cell development	Gene Ontology	5	57	0.0070431	0.0490287	56623|5324|627|1499|3815	http://amigo.geneontology.org/amigo/term/GO:0010720
hsa-miR-1301-3p	GO:0031967	CC	organelle envelope	Gene Ontology	9	165	0.00713975	0.0495537	8888|7112|647087|3841|80314|7514|9972|83990|28977	http://amigo.geneontology.org/amigo/term/GO:0031967
hsa-miR-1301-3p	GO:0005739	CC	mitochondrion	Gene Ontology	12	260	0.00727955	0.0497713	54996|10061|50484|94081|54880|4190|26052|5530|10455|28977|1386|9776	http://amigo.geneontology.org/amigo/term/GO:0005739
hsa-miR-1301-3p	GO:1902850	BP	microtubule cytoskeleton organization involved in mitosis	Gene Ontology	3	18	0.00744117	0.0497713	10253|9493|9181	http://amigo.geneontology.org/amigo/term/GO:1902850
hsa-miR-1301-3p	GO:0001946	BP	lymphangiogenesis	Gene Ontology	2	5	0.00738961	0.0497713	5784|2296	http://amigo.geneontology.org/amigo/term/GO:0001946
hsa-miR-1301-3p	GO:0003964	MF	RNA-directed DNA polymerase activity	Gene Ontology	2	5	0.00738961	0.0497713	6950|140609	http://amigo.geneontology.org/amigo/term/GO:0003964
hsa-miR-1301-3p	GO:0007616	BP	long-term memory	Gene Ontology	2	5	0.00738961	0.0497713	2475|6198	http://amigo.geneontology.org/amigo/term/GO:0007616
hsa-miR-1301-3p	GO:0009678	MF	pyrophosphate hydrolysis-driven proton transmembrane transporter activity	Gene Ontology	2	5	0.00738961	0.0497713	8992|526	http://amigo.geneontology.org/amigo/term/GO:0009678
hsa-miR-1301-3p	GO:0030137	CC	COPI-coated vesicle	Gene Ontology	2	5	0.00738961	0.0497713	1315|22820	http://amigo.geneontology.org/amigo/term/GO:0030137
hsa-miR-1301-3p	GO:0035194	BP	posttranscriptional gene silencing by RNA	Gene Ontology	2	5	0.00738961	0.0497713	389421|27161	http://amigo.geneontology.org/amigo/term/GO:0035194
hsa-miR-1301-3p	GO:0044380	BP	protein localization to cytoskeleton	Gene Ontology	2	5	0.00738961	0.0497713	5108|10615	http://amigo.geneontology.org/amigo/term/GO:0044380
hsa-miR-1301-3p	GO:0045669	BP	positive regulation of osteoblast differentiation	Gene Ontology	2	5	0.00738961	0.0497713	5587|51430	http://amigo.geneontology.org/amigo/term/GO:0045669
hsa-miR-1301-3p	GO:0048709	BP	oligodendrocyte differentiation	Gene Ontology	3	18	0.00744117	0.0497713	4763|5080|2475	http://amigo.geneontology.org/amigo/term/GO:0048709
hsa-miR-1301-3p	GO:0051973	BP	positive regulation of telomerase activity	Gene Ontology	2	5	0.00738961	0.0497713	6950|1499	http://amigo.geneontology.org/amigo/term/GO:0051973
hsa-miR-1301-3p	GO:0061980	MF	regulatory RNA binding	Gene Ontology	2	5	0.00738961	0.0497713	192670|3181	http://amigo.geneontology.org/amigo/term/GO:0061980
hsa-miR-1301-3p	GO:0072073	BP	kidney epithelium development	Gene Ontology	3	18	0.00744117	0.0497713	1499|1948|5455	http://amigo.geneontology.org/amigo/term/GO:0072073
hsa-miR-1301-3p	GO:1902229	BP	regulation of intrinsic apoptotic signaling pathway in response to DNA damage	Gene Ontology	2	5	0.00738961	0.0497713	51616|23411	http://amigo.geneontology.org/amigo/term/GO:1902229
hsa-miR-1301-3p	GO:1903322	BP	positive regulation of protein modification by small protein conjugation or removal	Gene Ontology	3	18	0.00744117	0.0497713	91947|123879|9810	http://amigo.geneontology.org/amigo/term/GO:1903322
hsa-miR-1301-3p	GO:0051674	BP	localization of cell	Gene Ontology	10	197	0.0075015	0.0499838	2624|473|5108|7046|5793|1499|80139|23236|483|1462	http://amigo.geneontology.org/amigo/term/GO:0051674
hsa-miR-1301-3p	GO:0071495	BP	cellular response to endogenous stimulus	Gene Ontology	10	197	0.0075015	0.0499838	308|4176|8195|23054|79876|6198|7046|1499|7182|490	http://amigo.geneontology.org/amigo/term/GO:0071495
hsa-miR-411-5p	GO:0005622	CC	intracellular	Gene Ontology	57	2228	5.3983e-12	5.2018e-09	8500|10066|6595|23208|7539|317|10730|4026|5604|11320|10450|23429|10381|55362|135293|255919|5586|5430|8021|26127|90417|57679|160760|9495|23011|7357|11236|7414|54919|27340|26118|55151|3189|27089|2309|9725|57720|57695|2935|10314|9440|342892|22909|64979|51501|7025|64318|23545|92979|841|904|1843|11100|23155|1454|1964|92482	http://amigo.geneontology.org/amigo/term/GO:0005622
hsa-miR-411-5p	GO:0005654	CC	nucleoplasm	Gene Ontology	25	474	8.81113e-12	6.06458e-09	10066|1454|3320|25885|403341|1871|23082|5888|54870|5430|7159|81608|51755|7750|55660|10527|4090|9440|147923|8289|904|140609|3189|23064|252983	http://amigo.geneontology.org/amigo/term/GO:0005654
hsa-miR-411-5p	GO:0043229	CC	intracellular organelle	Gene Ontology	50	1863	2.55475e-11	1.36764e-08	1871|9852|256471|3309|80829|10254|23064|55017|252983|1111|7436|83732|10973|54443|1040|27340|51068|7752|55256|4090|9330|27089|1353|9110|10645|84984|672|10206|22909|9581|546|7025|26053|23450|8417|51441|92979|51018|7707|1647|4731|5610|133619|11320|10923|59343|51763|1763|8850|55676	http://amigo.geneontology.org/amigo/term/GO:0043229
hsa-miR-411-5p	GO:0071704	BP	organic substance metabolic process	Gene Ontology	46	1671	7.83017e-11	3.21319e-08	1161|5298|317|9208|9618|5604|3678|4090|2194|9169|1871|158584|9320|4616|84938|81608|5194|7707|374879|1111|1659|83732|10480|549|55660|57551|10645|9330|6573|54457|375743|9440|10206|22909|9841|10018|55905|9869|10962|26994|11100|11320|10923|1964|151242|29107	http://amigo.geneontology.org/amigo/term/GO:0071704
hsa-miR-411-5p	GO:0071705	BP	nitrogen compound transport	Gene Ontology	20	325	8.66987e-11	3.21319e-08	285605|9495|220988|23204|9179|81608|9367|22796|8021|51552|57515|79719|51763|64089|10013|11231|7879|23041|9575|54536	http://amigo.geneontology.org/amigo/term/GO:0071705
hsa-miR-411-5p	GO:0005829	CC	cytosol	Gene Ontology	23	531	2.32122e-09	6.98976e-07	8500|5298|22796|317|3633|5604|5213|10254|2309|4677|55233|26118|7750|586|4090|9110|9208|51501|11231|10097|5718|1454|64089	http://amigo.geneontology.org/amigo/term/GO:0005829
hsa-miR-411-5p	GO:0016070	BP	RNA metabolic process	Gene Ontology	27	738	3.06323e-09	7.76769e-07	127933|4899|9994|1111|5431|96459|27086|7539|10605|27340|51592|7750|55660|9330|10206|9841|342892|84146|905|10923|9412|57504|9575|254251|7748|8850|80345	http://amigo.geneontology.org/amigo/term/GO:0016070
hsa-miR-411-5p	GO:1901576	BP	organic substance biosynthetic process	Gene Ontology	31	990	7.02235e-09	1.61113e-06	51804|60488|25885|2194|23429|4659|9188|5586|10628|10973|1717|1964|1111|6322|55174|2309|2935|220992|8669|51520|7707|84146|1040|340252|170960|26586|905|5425|140609|57504|254251	http://amigo.geneontology.org/amigo/term/GO:1901576
hsa-miR-411-5p	GO:0005515	MF	protein binding	Gene Ontology	42	1688	9.91948e-09	1.83816e-06	5298|54982|29967|3633|390916|6895|9169|5884|23082|9320|4659|9994|2309|54870|7094|90417|5194|10254|1111|7436|55233|83732|55236|27340|29035|51060|54457|84984|57534|10466|51501|9618|147923|11231|9495|57720|3189|81608|9412|92482|800|23011	http://amigo.geneontology.org/amigo/term/GO:0005515
hsa-miR-411-5p	GO:0010467	BP	gene expression	Gene Ontology	28	834	9.33486e-09	1.83816e-06	127933|4899|4478|10450|9169|9994|5586|54870|6668|5431|1982|81608|83732|7539|7750|55174|220992|9841|54460|11236|7707|10962|85457|5718|51118|23064|254251|55660	http://amigo.geneontology.org/amigo/term/GO:0010467
hsa-miR-411-5p	GO:0019222	BP	regulation of metabolic process	Gene Ontology	30	974	1.77273e-08	2.94518e-06	10140|4899|3633|5604|59343|403341|3309|10105|9320|4659|2821|54870|27|1717|1964|57679|102800317|7436|672|9841|8021|2101|8289|7707|22863|140609|1454|2673|7748|80345	http://amigo.geneontology.org/amigo/term/GO:0019222
hsa-miR-411-5p	GO:0005737	CC	cytoplasm	Gene Ontology	40	1641	3.9382e-08	5.92945e-06	60488|317|3836|11320|3678|256471|2194|22873|55870|9320|51306|1982|58513|4677|54982|51552|2821|55233|26258|55236|51118|586|57551|4090|1353|10018|9618|10013|55905|7707|1040|26994|1629|9852|1454|9411|79719|8669|151242|84067	http://amigo.geneontology.org/amigo/term/GO:0005737
hsa-miR-411-5p	GO:0006357	BP	regulation of transcription by RNA polymerase II	Gene Ontology	16	306	5.84733e-08	7.90349e-06	2309|27086|4899|4090|26586|7091|6668|9440|10628|9852|51755|3309|254251|2101|7750|8289	http://amigo.geneontology.org/amigo/term/GO:0006357
hsa-miR-411-5p	GO:0050794	BP	regulation of cellular process	Gene Ontology	39	1600	5.90547e-08	7.90349e-06	79989|127933|5604|9852|59343|23082|80829|255919|5586|10973|26258|9495|23011|7539|51755|2821|10480|27340|55660|10645|220992|9869|9824|10787|7357|81575|147923|8021|342892|1040|10097|10962|905|59338|135293|10772|10773|192670|80345	http://amigo.geneontology.org/amigo/term/GO:0050794
hsa-miR-411-5p	GO:0043231	CC	intracellular membrane-bounded organelle	Gene Ontology	39	1606	6.49394e-08	8.23364e-06	3920|1161|56034|22796|10730|3320|256471|2194|403341|22873|10105|9223|7879|9188|10772|10979|60488|84612|26258|7752|23471|220992|4659|10018|54460|7025|147923|51018|11100|59338|135293|23064|9412|9581|57504|5194|254251|2101|8850	http://amigo.geneontology.org/amigo/term/GO:0043231
hsa-miR-411-5p	GO:1901363	MF	heterocyclic compound binding	Gene Ontology	26	813	8.09242e-08	9.74732e-06	494115|55362|9367|3320|4090|5213|9223|5430|1982|80205|374879|1659|51755|84617|55660|10645|2935|22909|23195|8289|10605|57504|192670|1763|7748|23283	http://amigo.geneontology.org/amigo/term/GO:1901363
hsa-miR-411-5p	GO:0043170	BP	macromolecule metabolic process	Gene Ontology	36	1440	1.0888e-07	1.24901e-05	10140|3920|54982|317|9208|10013|4090|403341|3309|10772|5430|7091|81608|27086|546|7750|55174|10645|302|2935|672|54460|51520|192111|11236|92979|7707|170960|1843|27316|96459|2673|192670|9575|151242|23429	http://amigo.geneontology.org/amigo/term/GO:0043170
hsa-miR-411-5p	GO:0051254	BP	positive regulation of RNA metabolic process	Gene Ontology	13	217	2.38655e-07	2.3955e-05	10923|905|10645|672|1111|51763|9575|1871|221937|8850|4659|27316|8289	http://amigo.geneontology.org/amigo/term/GO:0051254
hsa-miR-411-5p	GO:0051173	BP	positive regulation of nitrogen compound metabolic process	Gene Ontology	18	436	2.58066e-07	2.48673e-05	494115|27316|5430|1161|904|54982|57679|9440|3320|3678|6895|546|1000|7879|26053|5888|9994|4616	http://amigo.geneontology.org/amigo/term/GO:0051173
hsa-miR-411-5p	GO:0031974	CC	membrane-enclosed lumen	Gene Ontology	23	697	2.72385e-07	2.52375e-05	1161|25885|5884|4659|2821|91452|9223|10628|1659|54443|27340|549|55660|10466|2186|4731|905|5425|5718|135293|10772|3842|254048	http://amigo.geneontology.org/amigo/term/GO:0031974
hsa-miR-411-5p	GO:0044238	BP	primary metabolic process	Gene Ontology	37	1578	3.33487e-07	2.97545e-05	10140|23204|1161|54982|11320|160760|4616|96459|102800317|64801|57515|7539|51755|10605|140710|55660|2935|84146|54460|9869|9841|147923|192111|51018|1647|1040|85457|5425|59338|140609|51118|27316|26127|9412|9575|151242|54926	http://amigo.geneontology.org/amigo/term/GO:0044238
hsa-miR-411-5p	GO:0043233	CC	organelle lumen	Gene Ontology	23	725	5.26841e-07	4.40203e-05	64434|390916|83695|3309|7091|80205|1111|55660|3836|22909|23431|7025|56929|7707|4731|5718|5425|59338|10923|79719|51076|1763|23283	http://amigo.geneontology.org/amigo/term/GO:0043233
hsa-miR-411-5p	GO:0044267	BP	cellular protein metabolic process	Gene Ontology	23	726	5.39061e-07	4.40203e-05	10140|1161|60488|4478|4820|80829|160760|2821|5586|4677|64979|51592|375743|57534|11236|904|5718|22863|9412|192670|9575|151242|54926	http://amigo.geneontology.org/amigo/term/GO:0044267
hsa-miR-411-5p	GO:0031325	BP	positive regulation of cellular metabolic process	Gene Ontology	18	461	5.61266e-07	4.43308e-05	10140|51804|905|140609|57679|23326|3678|672|9994|9852|10018|2194|51763|9575|10013|2101|255919|55870	http://amigo.geneontology.org/amigo/term/GO:0031325
hsa-miR-411-5p	GO:0009987	BP	cellular process	Gene Ontology	49	2484	5.93938e-07	4.47124e-05	56034|29967|6814|11320|59338|3678|83695|403341|10105|221937|5586|54870|6668|10973|10979|102800317|160760|10628|7436|57515|1659|546|6322|5519|7297|9110|302|375743|10314|10206|23389|64979|1040|2186|7025|8289|9869|84146|4731|1629|9852|10923|9411|57504|51076|1763|2101|8850|11100	http://amigo.geneontology.org/amigo/term/GO:0009987
hsa-miR-411-5p	GO:0008152	BP	metabolic process	Gene Ontology	38	1706	7.79529e-07	5.69056e-05	127933|1161|4089|130367|10730|3678|9169|221937|4659|9495|9188|4616|6573|5431|55905|55706|26053|51592|7884|55256|4090|27|10013|92979|340252|170960|85457|5718|26586|5610|26994|23181|3189|23064|2673|57504|23283|11100	http://amigo.geneontology.org/amigo/term/GO:0008152
hsa-miR-411-5p	GO:0005634	CC	nucleus	Gene Ontology	30	1182	9.76325e-07	6.8173e-05	127933|51804|56034|54457|9618|4478|256471|22873|55870|4616|6668|90417|80205|55706|1659|83732|6322|51118|3836|9330|51501|51520|55905|904|905|5425|59343|51076|2101|8850	http://amigo.geneontology.org/amigo/term/GO:0005634
hsa-miR-411-5p	GO:0005488	MF	binding	Gene Ontology	45	2247	1.21762e-06	8.1479e-05	8500|3920|3597|23208|29967|9208|11320|255919|11100|4677|10979|160760|10254|7436|51755|27340|26118|1462|586|58513|57020|220992|10018|2186|26053|10527|11231|8021|8417|23545|92979|7707|340252|5425|4131|5610|154865|9412|79738|1362|192670|64089|1763|2101|54926	http://amigo.geneontology.org/amigo/term/GO:0005488
hsa-miR-411-5p	GO:0045935	BP	positive regulation of nucleobase-containing compound metabolic process	Gene Ontology	13	257	1.45846e-06	9.49574e-05	7707|4899|8850|10962|26586|10645|23064|9412|3309|221937|5888|4659|55870	http://amigo.geneontology.org/amigo/term/GO:0045935
hsa-miR-411-5p	GO:0031981	CC	nuclear lumen	Gene Ontology	20	603	1.53127e-06	9.70744e-05	56929|10772|64434|64318|3836|10979|80205|4899|10730|1111|22909|8021|23283|83732|403341|51076|5888|9223|51118|9169	http://amigo.geneontology.org/amigo/term/GO:0031981
hsa-miR-411-5p	GO:0060255	BP	regulation of macromolecule metabolic process	Gene Ontology	26	957	1.6043e-06	9.90966e-05	4899|54982|3678|1871|55870|5888|9495|4616|9994|10628|7436|546|6322|7750|3836|4090|84146|9869|147923|1647|10962|904|22863|5610|140609|9412	http://amigo.geneontology.org/amigo/term/GO:0060255
hsa-miR-411-5p	GO:0061919	BP	process utilizing autophagic mechanism	Gene Ontology	9	111	1.71207e-06	0.00010311	3320|3920|27|84938|51306|10206|10013|140710|23545	http://amigo.geneontology.org/amigo/term/GO:0061919
hsa-miR-411-5p	GO:0051128	BP	regulation of cellular component organization	Gene Ontology	14	320	2.93722e-06	0.000166489	285605|54870|51306|27|10097|26586|841|22863|5610|9495|4478|7879|151242|7750	http://amigo.geneontology.org/amigo/term/GO:0051128
hsa-miR-411-5p	GO:0098588	CC	bounding membrane of organelle	Gene Ontology	13	276	3.08378e-06	0.000170778	79932|23204|22863|9367|302|22796|10466|5194|10018|64089|9110|8417|23545	http://amigo.geneontology.org/amigo/term/GO:0098588
hsa-miR-411-5p	GO:0046483	BP	heterocycle metabolic process	Gene Ontology	25	940	3.66803e-06	0.000196362	494115|6595|4089|9208|25885|10450|5213|5884|9994|5430|374879|27086|7539|51755|3189|4090|6668|672|9440|9841|147923|1647|1040|10962|5610	http://amigo.geneontology.org/amigo/term/GO:0046483
hsa-miR-411-5p	GO:0070013	CC	intracellular organelle lumen	Gene Ontology	21	712	4.93831e-06	0.00025045	2309|10923|10973|51755|841|5425|11100|23064|254048|3320|23431|220988|546|7025|2821|51076|27340|8850|7750|9188|135293	http://amigo.geneontology.org/amigo/term/GO:0070013
hsa-miR-411-5p	GO:0051246	BP	regulation of protein metabolic process	Gene Ontology	15	390	5.86997e-06	0.000288587	23204|54982|5610|57679|317|116496|1111|5604|59343|51755|8669|23450|151242|9994|4616	http://amigo.geneontology.org/amigo/term/GO:0051246
hsa-miR-411-5p	GO:0034645	BP	cellular macromolecule biosynthetic process	Gene Ontology	22	789	6.95065e-06	0.000331567	51804|6595|54457|55870|9188|5586|27316|1982|7091|10605|1462|2935|8669|10013|7707|340252|116496|23064|9412|57504|254251|8850	http://amigo.geneontology.org/amigo/term/GO:0034645
hsa-miR-411-5p	GO:0023052	BP	signaling	Gene Ontology	25	984	7.88229e-06	0.000361685	3633|83695|5213|22873|55870|4659|9590|4616|27|7159|121512|27086|51592|140710|9110|10314|57534|6814|10206|9824|10018|10013|51763|2101|151242	http://amigo.geneontology.org/amigo/term/GO:0023052
hsa-miR-411-5p	GO:0044249	BP	cellular biosynthetic process	Gene Ontology	25	984	7.88229e-06	0.000361685	51804|403341|23082|221937|4659|9994|5586|54870|10773|10628|11236|51592|55174|2309|9110|342892|51520|55870|10962|904|1843|5610|5425|2101|11100	http://amigo.geneontology.org/amigo/term/GO:0044249
hsa-miR-411-5p	GO:2000112	BP	regulation of cellular macromolecule biosynthetic process	Gene Ontology	19	619	8.14282e-06	0.000366655	5586|7707|84146|4090|6595|7539|374879|9208|546|27316|5604|9412|57504|23429|26053|7748|51592|4659|403341	http://amigo.geneontology.org/amigo/term/GO:2000112
hsa-miR-411-5p	GO:0043933	BP	protein-containing complex subunit organization	Gene Ontology	12	263	1.00146e-05	0.000442664	4731|56034|302|54457|6814|54460|9169|23064|192670|7109|23545|8289	http://amigo.geneontology.org/amigo/term/GO:0043933
hsa-miR-411-5p	GO:0051641	BP	cellular localization	Gene Ontology	14	360	1.06364e-05	0.000461677	285605|10772|7094|23471|841|9367|102800317|57132|10628|51501|10979|29097|8417|7884	http://amigo.geneontology.org/amigo/term/GO:0051641
hsa-miR-411-5p	GO:0034641	BP	cellular nitrogen compound metabolic process	Gene Ontology	25	1017	1.35464e-05	0.000572515	494115|51804|54457|5213|9188|5586|27316|1982|7091|81608|10605|7750|4090|672|54460|8669|147923|5718|140609|3189|23064|9412|57504|254251|9169	http://amigo.geneontology.org/amigo/term/GO:0034641
hsa-miR-411-5p	GO:0043412	BP	macromolecule modification	Gene Ontology	19	652	1.63963e-05	0.000669471	1647|57679|905|1843|4089|55905|10645|57534|672|26224|26127|546|23429|2935|5604|26053|51592|54926|51763	http://amigo.geneontology.org/amigo/term/GO:0043412
hsa-miR-411-5p	GO:0051234	BP	establishment of localization	Gene Ontology	21	773	1.63627e-05	0.000669471	56262|7094|9725|22796|841|3842|302|57679|51552|3320|59343|57515|51501|79719|23545|10013|11231|57132|84067|9495|54536	http://amigo.geneontology.org/amigo/term/GO:0051234
hsa-miR-411-5p	GO:0140096	MF	catalytic activity, acting on a protein	Gene Ontology	16	488	1.95564e-05	0.000785189	9869|57551|23204|841|56034|317|102800317|11320|57534|1454|9412|127933|57504|51755|59343|4659	http://amigo.geneontology.org/amigo/term/GO:0140096
hsa-miR-411-5p	GO:0009889	BP	regulation of biosynthetic process	Gene Ontology	19	670	2.3539e-05	0.000922039	80345|85457|5604|1964|80205|3309|374879|8289|23082|27086|96459|9841|147923|9575|10605|10480|51592|5610|7752	http://amigo.geneontology.org/amigo/term/GO:0009889
hsa-miR-411-5p	GO:0005576	CC	extracellular region	Gene Ontology	20	736	2.59044e-05	0.000998458	7879|1111|3920|85480|317|147015|79932|10314|7094|135293|3320|51118|57551|3842|84617|5519|2101|8417|254048|28970	http://amigo.geneontology.org/amigo/term/GO:0005576
hsa-miR-411-5p	GO:0007275	BP	multicellular organism development	Gene Ontology	21	802	2.76245e-05	0.0010208	2309|54870|1717|6595|5718|54457|5610|317|3633|9618|6814|3320|1454|9841|56262|3309|8850|26045|302|2821|27089	http://amigo.geneontology.org/amigo/term/GO:0007275
hsa-miR-411-5p	GO:0044260	BP	cellular macromolecule metabolic process	Gene Ontology	28	1269	2.77551e-05	0.0010208	51804|9618|135293|83695|339287|221937|5888|9188|4616|54870|64979|27086|83732|7750|1462|3836|9869|10018|7025|147923|8021|11100|116496|23064|6895|7748|26224|54926	http://amigo.geneontology.org/amigo/term/GO:0044260
hsa-miR-411-5p	GO:0034613	BP	cellular protein localization	Gene Ontology	11	247	2.89383e-05	0.00103278	79989|10772|81608|10979|9495|10628|55706|8021|8417|7884|29107	http://amigo.geneontology.org/amigo/term/GO:0034613
hsa-miR-411-5p	GO:0050789	BP	regulation of biological process	Gene Ontology	35	1778	2.86595e-05	0.00103278	494115|8500|56034|5884|29967|5604|3678|3309|221937|9223|9590|5586|5431|7159|374879|51552|2821|10605|10480|26053|51592|2309|85480|2935|672|1871|51501|23450|51441|26118|85457|5718|1454|51763|26224	http://amigo.geneontology.org/amigo/term/GO:0050789
hsa-miR-411-5p	GO:0005643	CC	nuclear pore	Gene Ontology	4	16	2.94913e-05	0.00103715	10527|3836|59343|29107	http://amigo.geneontology.org/amigo/term/GO:0005643
hsa-miR-411-5p	GO:0016043	BP	cellular component organization	Gene Ontology	23	936	3.02023e-05	0.00104687	4899|317|10730|3678|23082|5586|10973|7159|90417|64801|23011|55236|54443|10480|55660|9869|10787|7357|4131|96459|79738|9575|139322	http://amigo.geneontology.org/amigo/term/GO:0016043
hsa-miR-411-5p	GO:0010604	BP	positive regulation of macromolecule metabolic process	Gene Ontology	15	454	3.25649e-05	0.00110491	57679|10962|96459|5610|10645|140609|10923|4478|4090|6895|51763|55870|4659|51441|10018	http://amigo.geneontology.org/amigo/term/GO:0010604
hsa-miR-411-5p	GO:0042623	MF	ATPase activity, coupled	Gene Ontology	5	37	3.97623e-05	0.00131216	23064|24137|546|6595|5884	http://amigo.geneontology.org/amigo/term/GO:0042623
hsa-miR-411-5p	GO:0018130	BP	heterocycle biosynthetic process	Gene Ontology	19	707	4.75115e-05	0.00148643	2309|10140|221937|23389|10962|905|1843|80205|5425|9994|9869|96459|9841|23082|254251|7748|8289|2101|7752	http://amigo.geneontology.org/amigo/term/GO:0018130
hsa-miR-411-5p	GO:0032501	BP	multicellular organismal process	Gene Ontology	25	1100	4.73748e-05	0.00148643	4089|317|3633|5604|23181|59343|9188|54870|7094|27|57679|2673|84612|54443|51118|6573|54457|9208|9841|10787|7707|59338|1454|9412|1000	http://amigo.geneontology.org/amigo/term/GO:0032501
hsa-miR-411-5p	GO:0048522	BP	positive regulation of cellular process	Gene Ontology	20	768	4.60797e-05	0.00148643	10787|23326|4090|6595|5194|5610|57679|7436|9618|9440|5604|9412|10018|6895|51763|10013|83695|5888|51118|1161	http://amigo.geneontology.org/amigo/term/GO:0048522
hsa-miR-411-5p	GO:0048518	BP	positive regulation of biological process	Gene Ontology	21	845	5.72059e-05	0.00172261	494115|27316|10097|7707|96459|26045|55905|317|102800317|9440|10628|4659|10450|23064|2186|546|55870|116496|8417|255919|23011	http://amigo.geneontology.org/amigo/term/GO:0048518
hsa-miR-411-5p	GO:0051716	BP	cellular response to stimulus	Gene Ontology	25	1113	5.68854e-05	0.00172261	79989|22873|317|5884|9994|4616|2309|5430|5431|2821|546|26118|4090|85480|9110|10645|672|9440|9824|10973|10013|192111|1040|6016|2101	http://amigo.geneontology.org/amigo/term/GO:0051716
hsa-miR-411-5p	GO:1901030	BP	positive regulation of mitochondrial outer membrane permeabilization involved in apoptotic signaling pathway	Gene Ontology	3	6	6.08639e-05	0.00181014	10018|7159|841	http://amigo.geneontology.org/amigo/term/GO:1901030
hsa-miR-411-5p	GO:0010605	BP	negative regulation of macromolecule metabolic process	Gene Ontology	14	427	6.42529e-05	0.00187619	2309|8021|904|22863|4089|2673|672|7436|10605|10013|221937|151242|26045|2821	http://amigo.geneontology.org/amigo/term/GO:0010605
hsa-miR-411-5p	GO:0043068	BP	positive regulation of programmed cell death	Gene Ontology	7	104	7.51098e-05	0.00216071	5519|841|96459|10628|10018|10105|9994	http://amigo.geneontology.org/amigo/term/GO:0043068
hsa-miR-411-5p	GO:1903506	BP	regulation of nucleic acid-templated transcription	Gene Ontology	16	549	7.57907e-05	0.00216071	5586|494115|84146|10973|170960|26586|11100|9208|220992|23389|9841|6322|7025|23082|8850|9994	http://amigo.geneontology.org/amigo/term/GO:1903506
hsa-miR-411-5p	GO:0043227	CC	membrane-bounded organelle	Gene Ontology	37	2030	8.1281e-05	0.00229013	10066|56034|3633|10730|147923|339287|22873|221937|4659|255919|54870|58513|7159|7091|57679|64801|7879|27086|84612|51060|1462|10527|3836|9110|302|10314|220992|7357|51520|23195|56929|904|22863|7884|254251|23283|1000	http://amigo.geneontology.org/amigo/term/GO:0043227
hsa-miR-411-5p	GO:0007154	BP	cell communication	Gene Ontology	23	1003	8.35739e-05	0.00232751	29967|3320|4659|2821|4616|23011|51306|5431|121512|102800317|7879|1111|55233|10314|23545|10097|5718|22863|388677|1763|8850|26045|1000	http://amigo.geneontology.org/amigo/term/GO:0007154
hsa-miR-411-5p	GO:0003676	MF	nucleic acid binding	Gene Ontology	15	501	9.48892e-05	0.00257914	127933|6668|51804|1982|1964|2935|1871|10773|220988|6895|192670|10605|80829|9994|7752	http://amigo.geneontology.org/amigo/term/GO:0003676
hsa-miR-411-5p	GO:2001141	BP	regulation of RNA biosynthetic process	Gene Ontology	17	621	9.52858e-05	0.00257914	494115|9869|340252|10962|905|80205|7091|54457|7436|1111|9852|57504|2186|51755|254251|23082|26053	http://amigo.geneontology.org/amigo/term/GO:2001141
hsa-miR-411-5p	GO:0031256	CC	leading edge membrane	Gene Ontology	4	23	0.000101568	0.0026882	3320|11252|51763|59338	http://amigo.geneontology.org/amigo/term/GO:0031256
hsa-miR-411-5p	GO:0031647	BP	regulation of protein stability	Gene Ontology	5	46	0.000102663	0.0026882	10013|59343|26224|11236|252983	http://amigo.geneontology.org/amigo/term/GO:0031647
hsa-miR-411-5p	GO:1901362	BP	organic cyclic compound biosynthetic process	Gene Ontology	18	689	0.000105696	0.00272323	494115|54870|1717|10962|904|23326|4089|170960|27086|80345|9852|6322|147923|340252|221937|10923|7750|7752	http://amigo.geneontology.org/amigo/term/GO:1901362
hsa-miR-411-5p	GO:0012505	CC	endomembrane system	Gene Ontology	17	633	0.000119024	0.0029408	3920|10973|23471|26994|22863|55151|154865|64801|10254|5604|10018|11231|29097|7109|55870|8417|51060	http://amigo.geneontology.org/amigo/term/GO:0012505
hsa-miR-411-5p	GO:1901564	BP	organonitrogen compound metabolic process	Gene Ontology	23	1027	0.000117362	0.0029408	127933|11320|23429|55870|160760|9994|64801|55236|26053|1462|586|4090|51755|9110|375743|672|9440|10206|7357|10013|57504|151242|5213	http://amigo.geneontology.org/amigo/term/GO:1901564
hsa-miR-411-5p	GO:0043632	BP	modification-dependent macromolecule catabolic process	Gene Ontology	6	78	0.00012403	0.00303338	55236|1161|9575|10013|54926|55905	http://amigo.geneontology.org/amigo/term/GO:0043632
hsa-miR-411-5p	GO:0003677	MF	DNA binding	Gene Ontology	13	401	0.000129829	0.00312759	24137|84146|340252|904|7707|9841|220992|9869|9852|7539|6322|5884|5888	http://amigo.geneontology.org/amigo/term/GO:0003677
hsa-miR-411-5p	GO:0051171	BP	regulation of nitrogen compound metabolic process	Gene Ontology	21	900	0.000134469	0.00320728	5586|54870|57551|2935|1982|26586|56034|1843|80205|5718|9208|220992|2821|1454|4478|403341|10013|5604|2309|7750|6322	http://amigo.geneontology.org/amigo/term/GO:0051171
hsa-miR-411-5p	GO:0043226	CC	organelle	Gene Ontology	37	2086	0.000138785	0.00326177	64434|220988|130367|4899|4478|160760|9320|9495|90417|148362|64801|23011|51678|157378|5604|27340|3189|9725|7297|317|57020|57534|6814|10466|51501|10787|7357|8021|8289|5718|11252|51118|27316|81608|3842|2101|8850	http://amigo.geneontology.org/amigo/term/GO:0043226
hsa-miR-411-5p	GO:0010564	BP	regulation of cell cycle process	Gene Ontology	6	81	0.000150597	0.00348834	5586|1647|546|54443|83695|55660	http://amigo.geneontology.org/amigo/term/GO:0010564
hsa-miR-411-5p	GO:0010941	BP	regulation of cell death	Gene Ontology	10	250	0.00015486	0.00355294	2309|841|4089|317|51118|2821|10105|23181|10013|51060	http://amigo.geneontology.org/amigo/term/GO:0010941
hsa-miR-411-5p	GO:0031252	CC	cell leading edge	Gene Ontology	5	51	0.00016083	0.00363793	57679|11252|51763|1000|59338	http://amigo.geneontology.org/amigo/term/GO:0031252
hsa-miR-411-5p	GO:0044237	BP	cellular metabolic process	Gene Ontology	32	1718	0.000171431	0.00383286	494115|51804|6595|317|3320|9852|339287|5888|2821|5430|27|7091|5194|4820|10628|546|11236|55236|26053|55174|9110|9440|9869|9841|10018|2186|23545|8289|1843|2673|23389|80345	http://amigo.geneontology.org/amigo/term/GO:0044237
hsa-miR-411-5p	GO:0050896	BP	response to stimulus	Gene Ontology	27	1343	0.000173129	0.00383286	4899|317|3633|9618|3320|2194|51592|9590|9495|10628|58513|10979|7879|27086|128178|302|10206|51501|2186|192111|51441|5519|1040|841|192670|151242|26224	http://amigo.geneontology.org/amigo/term/GO:0050896
hsa-miR-411-5p	GO:1901701	BP	cellular response to oxygen-containing compound	Gene Ontology	8	161	0.000174221	0.00383286	27|672|23064|4478|7436|252983|10105|140710	http://amigo.geneontology.org/amigo/term/GO:1901701
hsa-miR-411-5p	GO:0045786	BP	negative regulation of cell cycle	Gene Ontology	6	84	0.000181476	0.00395633	1982|1111|83695|9575|5884|8850	http://amigo.geneontology.org/amigo/term/GO:0045786
hsa-miR-411-5p	GO:0045934	BP	negative regulation of nucleobase-containing compound metabolic process	Gene Ontology	9	212	0.000215407	0.00459218	51804|6595|9869|57504|2186|9575|546|9320|8289	http://amigo.geneontology.org/amigo/term/GO:0045934
hsa-miR-411-5p	GO:0043043	BP	peptide biosynthetic process	Gene Ontology	7	125	0.000221422	0.00465857	2309|60488|1964|2935|4677|10605|11236	http://amigo.geneontology.org/amigo/term/GO:0043043
hsa-miR-411-5p	GO:1901796	BP	regulation of signal transduction by p53 class mediator	Gene Ontology	4	29	0.000226812	0.00473066	1111|1763|7159|5884	http://amigo.geneontology.org/amigo/term/GO:1901796
hsa-miR-411-5p	GO:0051172	BP	negative regulation of nitrogen compound metabolic process	Gene Ontology	11	316	0.00023585	0.00487693	7707|51804|23204|7091|96459|4089|10772|57504|2186|7025|11236	http://amigo.geneontology.org/amigo/term/GO:0051172
hsa-miR-411-5p	GO:0035556	BP	intracellular signal transduction	Gene Ontology	13	430	0.000250616	0.0051164	1647|55233|5298|56034|9367|5718|5604|10018|83695|192670|10105|10787|4616	http://amigo.geneontology.org/amigo/term/GO:0035556
hsa-miR-411-5p	GO:0090304	BP	nucleic acid metabolic process	Gene Ontology	19	811	0.000265031	0.0053205	51018|10140|5430|8021|80345|127933|1843|317|672|27086|220992|7025|254251|23389|1763|221937|10923|9994|8289	http://amigo.geneontology.org/amigo/term/GO:0090304
hsa-miR-411-5p	GO:0031090	CC	organelle membrane	Gene Ontology	14	493	0.000272003	0.00541534	4731|5298|5194|64979|3633|64801|10254|10466|57515|10730|55863|255919|55676|27089	http://amigo.geneontology.org/amigo/term/GO:0031090
hsa-miR-411-5p	GO:0001067	MF	regulatory region nucleic acid binding	Gene Ontology	7	130	0.000277988	0.00548913	51804|340252|904|54457|9575|10013|8850	http://amigo.geneontology.org/amigo/term/GO:0001067
hsa-miR-411-5p	GO:0071375	BP	cellular response to peptide hormone stimulus	Gene Ontology	4	31	0.00028608	0.00558031	2673|8850|51763|252983	http://amigo.geneontology.org/amigo/term/GO:0071375
hsa-miR-411-5p	GO:0006807	BP	nitrogen compound metabolic process	Gene Ontology	29	1541	0.000294084	0.00566758	1161|317|3320|9852|83695|221937|55870|9188|6573|4677|57679|255919|7539|27340|1462|55660|130367|22909|7357|11231|55905|841|26994|5425|5610|905|57504|51763|151242	http://amigo.geneontology.org/amigo/term/GO:0006807
hsa-miR-411-5p	GO:0080090	BP	regulation of primary metabolic process	Gene Ontology	19	823	0.000316408	0.00599221	9495|27086|8850|1717|905|1353|54457|317|23064|27316|7750|10206|127933|254251|10480|340252|342892|23326|9994	http://amigo.geneontology.org/amigo/term/GO:0080090
hsa-miR-411-5p	GO:0010557	BP	positive regulation of macromolecule biosynthetic process	Gene Ontology	10	281	0.000380105	0.00707084	127933|904|7707|116496|5604|9852|59343|6895|26053|55870	http://amigo.geneontology.org/amigo/term/GO:0010557
hsa-miR-411-5p	GO:0032991	CC	protein-containing complex	Gene Ontology	16	639	0.000398236	0.00729545	5430|10097|904|841|22863|302|54457|64979|10923|23429|9575|27340|7109|1000|84067|8289	http://amigo.geneontology.org/amigo/term/GO:0032991
hsa-miR-411-5p	GO:0015833	BP	peptide transport	Gene Ontology	10	284	0.000411874	0.00748834	10527|3836|6814|51501|26258|252983|9575|84067|9590|23545	http://amigo.geneontology.org/amigo/term/GO:0015833
hsa-miR-411-5p	GO:0005694	CC	chromosome	Gene Ontology	7	140	0.000425847	0.00768439	9869|5431|55055|27316|2186|9575|8850	http://amigo.geneontology.org/amigo/term/GO:0005694
hsa-miR-411-5p	GO:0009719	BP	response to endogenous stimulus	Gene Ontology	9	234	0.000431643	0.00773106	4090|56034|4089|6814|2186|10979|10013|51592|9495	http://amigo.geneontology.org/amigo/term/GO:0009719
hsa-miR-411-5p	GO:0051252	BP	regulation of RNA metabolic process	Gene Ontology	15	582	0.0004493	0.00798793	23326|4899|10973|127933|80205|7707|54457|23389|10628|5604|9841|23082|55870|2101|51441	http://amigo.geneontology.org/amigo/term/GO:0051252
hsa-miR-411-5p	GO:0045892	BP	negative regulation of transcription, DNA-templated	Gene Ontology	8	187	0.000456668	0.00805944	7707|9869|23429|9575|10013|221937|51592|51763	http://amigo.geneontology.org/amigo/term/GO:0045892
hsa-miR-411-5p	GO:0031326	BP	regulation of cellular biosynthetic process	Gene Ontology	16	652	0.000492269	0.00835123	7707|6595|1964|5610|1111|23389|9852|59343|6895|23429|51755|147923|546|221937|4659|2186	http://amigo.geneontology.org/amigo/term/GO:0031326
hsa-miR-411-5p	GO:0051130	BP	positive regulation of cellular component organization	Gene Ontology	8	189	0.000488542	0.00835123	10962|57534|672|7436|10013|26053|8850|26045	http://amigo.geneontology.org/amigo/term/GO:0051130
hsa-miR-411-5p	GO:0046872	MF	metal ion binding	Gene Ontology	16	657	0.000533203	0.00879785	5430|27|80345|28970|10645|9169|390916|4026|9841|55233|1362|23429|9618|2101|1462|7752	http://amigo.geneontology.org/amigo/term/GO:0046872
hsa-miR-411-5p	GO:0006367	BP	transcription initiation from RNA polymerase II promoter	Gene Ontology	4	37	0.000529985	0.00879785	8850|54457|7025|1871	http://amigo.geneontology.org/amigo/term/GO:0006367
hsa-miR-411-5p	GO:0032502	BP	developmental process	Gene Ontology	20	932	0.000547278	0.00896866	2309|6668|26258|9575|56034|1843|5718|9440|23064|9412|10018|6895|51763|10381|3309|11231|1000|7750|3189|27089	http://amigo.geneontology.org/amigo/term/GO:0032502
hsa-miR-411-5p	GO:0005774	CC	vacuolar membrane	Gene Ontology	5	68	0.000557282	0.00898665	3920|9725|256471|51449|92979	http://amigo.geneontology.org/amigo/term/GO:0005774
hsa-miR-411-5p	GO:0008144	MF	drug binding	Gene Ontology	10	300	0.000620975	0.00982327	6595|5298|7297|102800317|1111|10450|83732|55236|5888|9223	http://amigo.geneontology.org/amigo/term/GO:0008144
hsa-miR-411-5p	GO:0031982	CC	vesicle	Gene Ontology	16	667	0.000623894	0.00982327	115207|9725|4677|148362|154865|6814|55752|57515|55233|1362|10013|7109|116496|59343|140710|51768	http://amigo.geneontology.org/amigo/term/GO:0031982
hsa-miR-411-5p	GO:0033036	BP	macromolecule localization	Gene Ontology	12	418	0.000668127	0.0102845	3920|81575|102800317|7879|1454|55706|51501|7414|22873|3842|7884|23545	http://amigo.geneontology.org/amigo/term/GO:0033036
hsa-miR-411-5p	GO:0019219	BP	regulation of nucleobase-containing compound metabolic process	Gene Ontology	15	608	0.000694395	0.0105018	27086|8021|170960|26586|5718|5610|11100|23064|9208|10206|9852|23082|9320|10923|7750	http://amigo.geneontology.org/amigo/term/GO:0019219
hsa-miR-411-5p	GO:0009058	BP	biosynthetic process	Gene Ontology	20	952	0.000706751	0.0105493	5586|4090|1982|10962|81608|8850|9412|9440|342892|10773|9841|10973|2194|546|10605|10013|7539|5888|80345|1462	http://amigo.geneontology.org/amigo/term/GO:0009058
hsa-miR-411-5p	GO:0009966	BP	regulation of signal transduction	Gene Ontology	12	424	0.000753434	0.0108002	1647|56034|4089|302|317|51306|1454|51763|10105|55870|80829|10254	http://amigo.geneontology.org/amigo/term/GO:0009966
hsa-miR-411-5p	GO:0019220	BP	regulation of phosphate metabolic process	Gene Ontology	9	254	0.000759717	0.0108002	8850|904|1353|4089|5610|6895|10105|5888|4616	http://amigo.geneontology.org/amigo/term/GO:0019220
hsa-miR-411-5p	GO:0032774	BP	RNA biosynthetic process	Gene Ontology	15	612	0.000740707	0.0108002	10140|5430|85457|904|54870|4089|11100|7091|84146|9208|9852|7539|7025|23082|26053	http://amigo.geneontology.org/amigo/term/GO:0032774
hsa-miR-411-5p	GO:0097659	BP	nucleic acid-templated transcription	Gene Ontology	15	612	0.000740707	0.0108002	5586|54870|51804|904|7091|4089|5610|7436|342892|25885|9841|3309|10013|254251|7752	http://amigo.geneontology.org/amigo/term/GO:0097659
hsa-miR-411-5p	GO:0019751	BP	polyol metabolic process	Gene Ontology	3	17	0.000766641	0.0108002	130367|51763|3633	http://amigo.geneontology.org/amigo/term/GO:0019751
hsa-miR-411-5p	GO:0035065	BP	regulation of histone acetylation	Gene Ontology	3	17	0.000766641	0.0108002	1111|4089|8850	http://amigo.geneontology.org/amigo/term/GO:0035065
hsa-miR-411-5p	GO:0035639	MF	purine ribonucleoside triphosphate binding	Gene Ontology	10	309	0.000772826	0.0108241	5586|23011|6016|4677|5610|2935|127933|1454|546|10381	http://amigo.geneontology.org/amigo/term/GO:0035639
hsa-miR-411-5p	GO:0044772	BP	mitotic cell cycle phase transition	Gene Ontology	5	74	0.000799768	0.0111046	586|1454|2935|102800317|57695	http://amigo.geneontology.org/amigo/term/GO:0044772
hsa-miR-411-5p	GO:0042254	BP	ribosome biogenesis	Gene Ontology	4	42	0.000823951	0.0113748	220064|83732|102800317|9188	http://amigo.geneontology.org/amigo/term/GO:0042254
hsa-miR-411-5p	GO:0006810	BP	transport	Gene Ontology	16	691	0.000896912	0.0120371	7879|3836|7159|220988|6541|57685|4089|64801|9495|10772|5604|10018|29107|51076|7884|23545	http://amigo.geneontology.org/amigo/term/GO:0006810
hsa-miR-411-5p	GO:0017076	MF	purine nucleotide binding	Gene Ontology	10	315	0.000890108	0.0120371	27|4677|10645|317|102800317|3320|79738|83732|10381|546	http://amigo.geneontology.org/amigo/term/GO:0017076
hsa-miR-411-5p	GO:0048524	BP	positive regulation of viral process	Gene Ontology	3	18	0.000888387	0.0120371	5430|10450|7879	http://amigo.geneontology.org/amigo/term/GO:0048524
hsa-miR-411-5p	GO:0048475	CC	coated membrane	Gene Ontology	3	18	0.000888387	0.0120371	23431|9179|57132	http://amigo.geneontology.org/amigo/term/GO:0048475
hsa-miR-411-5p	GO:0030554	MF	adenyl nucleotide binding	Gene Ontology	9	262	0.000937892	0.0124828	91452|5298|140609|1454|5604|5213|55236|5888|10730	http://amigo.geneontology.org/amigo/term/GO:0030554
hsa-miR-411-5p	GO:0000166	MF	nucleotide binding	Gene Ontology	11	377	0.00097544	0.0127708	23064|23283|10772|7297|84617|23011|10381|3309|1763|5888|7879	http://amigo.geneontology.org/amigo/term/GO:0000166
hsa-miR-411-5p	GO:0016071	BP	mRNA metabolic process	Gene Ontology	6	118	0.00100496	0.0130159	904|11100|2935|23450|8021|3189	http://amigo.geneontology.org/amigo/term/GO:0016071
hsa-miR-411-5p	GO:0016567	BP	protein ubiquitination	Gene Ontology	6	118	0.00100496	0.0130159	23326|9618|9440|672|26224|55905	http://amigo.geneontology.org/amigo/term/GO:0016567
hsa-miR-411-5p	GO:0006661	BP	phosphatidylinositol biosynthetic process	Gene Ontology	3	19	0.00102173	0.0131272	9110|51763|5298	http://amigo.geneontology.org/amigo/term/GO:0006661
hsa-miR-411-5p	GO:0019538	BP	protein metabolic process	Gene Ontology	19	911	0.00103631	0.0132439	5586|127933|27|1161|56034|22863|57695|375743|4820|26994|9869|4478|54460|55236|9320|51592|4659|2821|55905	http://amigo.geneontology.org/amigo/term/GO:0019538
hsa-miR-411-5p	GO:0006725	BP	cellular aromatic compound metabolic process	Gene Ontology	19	913	0.00106236	0.0134696	5586|127933|23450|10973|25885|1843|6895|5884|10628|4677|1763|57504|7025|3309|23389|26053|221937|8021|55660	http://amigo.geneontology.org/amigo/term/GO:0006725
hsa-miR-411-5p	GO:0097159	MF	organic cyclic compound binding	Gene Ontology	18	845	0.00110857	0.0139454	9994|57551|904|7297|6016|54457|220992|51552|27086|10450|1659|83732|2186|254251|51520|2194|23283|3189	http://amigo.geneontology.org/amigo/term/GO:0097159
hsa-miR-411-5p	GO:0017038	BP	protein import	Gene Ontology	3	20	0.00116708	0.0144922	3320|5194|3920	http://amigo.geneontology.org/amigo/term/GO:0017038
hsa-miR-411-5p	GO:0006364	BP	rRNA processing	Gene Ontology	4	47	0.00121744	0.0149634	51018|1454|102800317|51118	http://amigo.geneontology.org/amigo/term/GO:0006364
hsa-miR-411-5p	GO:1902680	BP	positive regulation of RNA biosynthetic process	Gene Ontology	8	219	0.00122432	0.0149715	2309|7707|51804|10962|10645|54457|59343|221937	http://amigo.geneontology.org/amigo/term/GO:1902680
hsa-miR-411-5p	GO:0032874	BP	positive regulation of stress-activated MAPK cascade	Gene Ontology	3	21	0.00132482	0.0158667	5610|57551|4616	http://amigo.geneontology.org/amigo/term/GO:0032874
hsa-miR-411-5p	GO:0042995	CC	cell projection	Gene Ontology	9	276	0.00133046	0.0158667	6573|3836|841|127933|24137|2186|22873|7879|1000	http://amigo.geneontology.org/amigo/term/GO:0042995
hsa-miR-411-5p	GO:0005768	CC	endosome	Gene Ontology	6	126	0.00138678	0.0162933	3920|9110|57020|64089|8417|7879	http://amigo.geneontology.org/amigo/term/GO:0005768
hsa-miR-411-5p	GO:0043900	BP	regulation of multi-organism process	Gene Ontology	6	126	0.00138678	0.0162933	10450|51306|904|10206|10018|7879	http://amigo.geneontology.org/amigo/term/GO:0043900
hsa-miR-411-5p	GO:0044265	BP	cellular macromolecule catabolic process	Gene Ontology	7	173	0.00139959	0.0162933	23326|127933|54982|10605|1454|51449|3309	http://amigo.geneontology.org/amigo/term/GO:0044265
hsa-miR-411-5p	GO:0018193	BP	peptidyl-amino acid modification	Gene Ontology	7	174	0.00144473	0.0166923	1454|3320|26127|10450|10105|8021|59343	http://amigo.geneontology.org/amigo/term/GO:0018193
hsa-miR-411-5p	GO:0006366	BP	transcription by RNA polymerase II	Gene Ontology	10	338	0.00148293	0.0170519	4090|7091|1871|9440|27086|7436|2186|3309|55870|55174	http://amigo.geneontology.org/amigo/term/GO:0006366
hsa-miR-411-5p	GO:0019438	BP	aromatic compound biosynthetic process	Gene Ontology	16	727	0.00149334	0.0170725	5586|54870|5430|9330|10450|81608|9440|342892|10773|2673|96459|2194|403341|23389|51763|6595	http://amigo.geneontology.org/amigo/term/GO:0019438
hsa-miR-411-5p	GO:0048583	BP	regulation of response to stimulus	Gene Ontology	14	593	0.00154889	0.0175177	23204|10962|841|7297|57679|7879|3320|59343|83695|10787|58513|8417|10254|1000	http://amigo.geneontology.org/amigo/term/GO:0048583
hsa-miR-411-5p	GO:0000278	BP	mitotic cell cycle	Gene Ontology	6	130	0.00161487	0.0181786	5586|90417|2935|140609|1111|546	http://amigo.geneontology.org/amigo/term/GO:0000278
hsa-miR-411-5p	GO:0006796	BP	phosphate-containing compound metabolic process	Gene Ontology	12	468	0.00170106	0.018376	1040|56034|22863|10645|102800317|140609|2194|5213|51755|80829|151242|27089	http://amigo.geneontology.org/amigo/term/GO:0006796
hsa-miR-411-5p	GO:0015031	BP	protein transport	Gene Ontology	9	285	0.00164613	0.018376	51552|3320|7884|29107|9179|10013|92482|9590|54536	http://amigo.geneontology.org/amigo/term/GO:0015031
hsa-miR-411-5p	GO:0000076	BP	DNA replication checkpoint	Gene Ontology	2	5	0.00169359	0.018376	1763|5884	http://amigo.geneontology.org/amigo/term/GO:0000076
hsa-miR-411-5p	GO:0004715	MF	non-membrane spanning protein tyrosine kinase activity	Gene Ontology	2	5	0.00169359	0.018376	5610|27	http://amigo.geneontology.org/amigo/term/GO:0004715
hsa-miR-411-5p	GO:0007040	BP	lysosome organization	Gene Ontology	2	5	0.00169359	0.018376	256471|84067	http://amigo.geneontology.org/amigo/term/GO:0007040
hsa-miR-411-5p	GO:0009267	BP	cellular response to starvation	Gene Ontology	3	23	0.00167903	0.018376	5610|7436|3309	http://amigo.geneontology.org/amigo/term/GO:0009267
hsa-miR-411-5p	GO:0060765	BP	regulation of androgen receptor signaling pathway	Gene Ontology	2	5	0.00169359	0.018376	10013|27086	http://amigo.geneontology.org/amigo/term/GO:0060765
hsa-miR-411-5p	GO:0061980	MF	regulatory RNA binding	Gene Ontology	2	5	0.00169359	0.018376	6895|192670	http://amigo.geneontology.org/amigo/term/GO:0061980
hsa-miR-411-5p	GO:2000643	BP	positive regulation of early endosome to late endosome transport	Gene Ontology	2	5	0.00169359	0.018376	23011|4478	http://amigo.geneontology.org/amigo/term/GO:2000643
hsa-miR-411-5p	GO:1901653	BP	cellular response to peptide	Gene Ontology	4	52	0.00172655	0.0185267	2673|7436|140710|252983	http://amigo.geneontology.org/amigo/term/GO:1901653
hsa-miR-411-5p	GO:0006914	BP	autophagy	Gene Ontology	5	89	0.00174313	0.0186217	3320|5604|27|140710|23545	http://amigo.geneontology.org/amigo/term/GO:0006914
hsa-miR-411-5p	GO:0042886	BP	amide transport	Gene Ontology	9	288	0.00176377	0.018759	79989|3920|23471|6814|157680|10628|59343|51763|64089	http://amigo.geneontology.org/amigo/term/GO:0042886
hsa-miR-411-5p	GO:0044271	BP	cellular nitrogen compound biosynthetic process	Gene Ontology	17	813	0.00182553	0.0192459	494115|4899|1040|1964|4089|80205|7884|25885|9412|6895|2186|51755|3309|147923|5610|9188|55174	http://amigo.geneontology.org/amigo/term/GO:0044271
hsa-miR-411-5p	GO:0048471	CC	perinuclear region of cytoplasm	Gene Ontology	5	91	0.0019126	0.0200324	5586|7436|6895|2186|5298	http://amigo.geneontology.org/amigo/term/GO:0048471
hsa-miR-411-5p	GO:0060249	BP	anatomical structure homeostasis	Gene Ontology	4	54	0.00196613	0.0204156	5425|3920|5213|7879	http://amigo.geneontology.org/amigo/term/GO:0060249
hsa-miR-411-5p	GO:0010646	BP	regulation of cell communication	Gene Ontology	12	478	0.00201643	0.0207147	10140|51755|7297|302|317|102800317|9495|1111|3678|9575|10105|9590	http://amigo.geneontology.org/amigo/term/GO:0010646
hsa-miR-411-5p	GO:0014070	BP	response to organic cyclic compound	Gene Ontology	6	136	0.00200911	0.0207147	4899|841|5610|672|4478|2101	http://amigo.geneontology.org/amigo/term/GO:0014070
hsa-miR-411-5p	GO:0031175	BP	neuron projection development	Gene Ontology	6	137	0.0020813	0.0211078	127933|27|4131|57679|23011|8850	http://amigo.geneontology.org/amigo/term/GO:0031175
hsa-miR-411-5p	GO:1901360	BP	organic cyclic compound metabolic process	Gene Ontology	19	971	0.00210338	0.0211127	4899|51804|6595|7884|4677|6322|9440|10773|9412|220988|7539|23429|5425|1871|23389|51592|59343|9994|192670	http://amigo.geneontology.org/amigo/term/GO:1901360
hsa-miR-411-5p	GO:0006312	BP	mitotic recombination	Gene Ontology	2	6	0.0022445	0.0220694	5425|1763	http://amigo.geneontology.org/amigo/term/GO:0006312
hsa-miR-411-5p	GO:0034314	BP	Arp2/3 complex-mediated actin nucleation	Gene Ontology	2	6	0.0022445	0.0220694	10787|10097	http://amigo.geneontology.org/amigo/term/GO:0034314
hsa-miR-411-5p	GO:2000779	BP	regulation of double-strand break repair	Gene Ontology	2	6	0.0022445	0.0220694	1111|5888	http://amigo.geneontology.org/amigo/term/GO:2000779
hsa-miR-411-5p	GO:0016239	BP	positive regulation of macroautophagy	Gene Ontology	3	26	0.00231245	0.0221973	10013|10206|5194	http://amigo.geneontology.org/amigo/term/GO:0016239
hsa-miR-411-5p	GO:0016310	BP	phosphorylation	Gene Ontology	10	360	0.0023174	0.0221973	1647|4731|5298|56034|23064|7436|59343|83732|55870|27089	http://amigo.geneontology.org/amigo/term/GO:0016310
hsa-miR-411-5p	GO:0071702	BP	organic substance transport	Gene Ontology	11	421	0.00227081	0.0221973	10628|10772|23471|7884|3320|252983|81575|92482|9590|23545|151473	http://amigo.geneontology.org/amigo/term/GO:0071702
hsa-miR-411-5p	GO:0030176	CC	integral component of endoplasmic reticulum membrane	Gene Ontology	3	26	0.00231245	0.0221973	23204|1717|3309	http://amigo.geneontology.org/amigo/term/GO:0030176
hsa-miR-411-5p	GO:0030666	CC	endocytic vesicle membrane	Gene Ontology	3	26	0.00231245	0.0221973	9367|3633|23545	http://amigo.geneontology.org/amigo/term/GO:0030666
hsa-miR-411-5p	GO:1902679	BP	negative regulation of RNA biosynthetic process	Gene Ontology	7	192	0.00246919	0.0234646	9869|27086|96459|9208|10628|221937|8289	http://amigo.geneontology.org/amigo/term/GO:1902679
hsa-miR-411-5p	GO:0006887	BP	exocytosis	Gene Ontology	4	58	0.00251245	0.0236888	9367|26258|7879|7414	http://amigo.geneontology.org/amigo/term/GO:0006887
hsa-miR-411-5p	GO:0022618	BP	ribonucleoprotein complex assembly	Gene Ontology	3	27	0.00255214	0.0238761	23064|8669|9169	http://amigo.geneontology.org/amigo/term/GO:0022618
hsa-miR-411-5p	GO:0035966	BP	response to topologically incorrect protein	Gene Ontology	3	27	0.00255214	0.0238761	11231|5610|3309	http://amigo.geneontology.org/amigo/term/GO:0035966
hsa-miR-411-5p	GO:0008104	BP	protein localization	Gene Ontology	10	367	0.00265048	0.0246526	285605|57020|6814|59338|10466|4478|22873|157680|8417|9590	http://amigo.geneontology.org/amigo/term/GO:0008104
hsa-miR-411-5p	GO:0004672	MF	protein kinase activity	Gene Ontology	7	195	0.0026837	0.0248289	5586|27|904|1454|7436|8850|4616	http://amigo.geneontology.org/amigo/term/GO:0004672
hsa-miR-411-5p	GO:0048731	BP	system development	Gene Ontology	15	701	0.00269005	0.0248289	2309|56262|4899|51804|4131|157378|59338|27086|3678|2186|55236|3309|11231|221937|1000	http://amigo.geneontology.org/amigo/term/GO:0048731
hsa-miR-411-5p	GO:0040011	BP	locomotion	Gene Ontology	8	250	0.00271867	0.0249496	5586|51804|4089|3678|54443|1000|7879|1462	http://amigo.geneontology.org/amigo/term/GO:0040011
hsa-miR-411-5p	GO:0030055	CC	cell-substrate junction	Gene Ontology	4	60	0.00282116	0.0255452	8500|3678|4659|11252	http://amigo.geneontology.org/amigo/term/GO:0030055
hsa-miR-411-5p	GO:0004520	MF	endodeoxyribonuclease activity	Gene Ontology	2	7	0.0028684	0.0255452	22909|5888	http://amigo.geneontology.org/amigo/term/GO:0004520
hsa-miR-411-5p	GO:0032981	BP	mitochondrial respiratory chain complex I assembly	Gene Ontology	2	7	0.0028684	0.0255452	55863|4731	http://amigo.geneontology.org/amigo/term/GO:0032981
hsa-miR-411-5p	GO:0060711	BP	labyrinthine layer development	Gene Ontology	2	7	0.0028684	0.0255452	5604|841	http://amigo.geneontology.org/amigo/term/GO:0060711
hsa-miR-411-5p	GO:0097747	MF	RNA polymerase activity	Gene Ontology	2	7	0.0028684	0.0255452	9412|5431	http://amigo.geneontology.org/amigo/term/GO:0097747
hsa-miR-411-5p	GO:1900739	BP	regulation of protein insertion into mitochondrial membrane involved in apoptotic signaling pathway	Gene Ontology	2	7	0.0028684	0.0255452	10018|841	http://amigo.geneontology.org/amigo/term/GO:1900739
hsa-miR-411-5p	GO:0043232	CC	intracellular non-membrane-bounded organelle	Gene Ontology	13	569	0.00295852	0.0262507	79989|5431|841|7297|127933|9869|55706|9581|51068|158584|64318|121512|51118	http://amigo.geneontology.org/amigo/term/GO:0043232
hsa-miR-411-5p	GO:1901652	BP	response to peptide	Gene Ontology	4	61	0.00298483	0.0262905	9852|252983|2101|6814	http://amigo.geneontology.org/amigo/term/GO:1901652
hsa-miR-411-5p	GO:0120025	CC	plasma membrane bounded cell projection	Gene Ontology	8	255	0.00305549	0.0268013	7094|57679|24137|4478|26258|2186|92482|2821	http://amigo.geneontology.org/amigo/term/GO:0120025
hsa-miR-411-5p	GO:1901526	BP	positive regulation of mitophagy	Gene Ontology	3	29	0.0030762	0.0268013	10013|5604|5194	http://amigo.geneontology.org/amigo/term/GO:1901526
hsa-miR-411-5p	GO:0006139	BP	nucleobase-containing compound metabolic process	Gene Ontology	18	933	0.00315379	0.0272404	127933|1647|8021|5610|2673|7436|7884|27086|9412|23429|7025|6668|6322|27340|8850|7750|3189|51763	http://amigo.geneontology.org/amigo/term/GO:0006139
hsa-miR-411-5p	GO:0032386	BP	regulation of intracellular transport	Gene Ontology	4	62	0.00315487	0.0272404	23011|4131|4659|51763	http://amigo.geneontology.org/amigo/term/GO:0032386
hsa-miR-411-5p	GO:0006950	BP	response to stress	Gene Ontology	13	578	0.00336657	0.0289129	10527|7094|27|56034|302|5718|6814|26127|10450|10018|6895|55870|8793	http://amigo.geneontology.org/amigo/term/GO:0006950
hsa-miR-411-5p	GO:0007165	BP	signal transduction	Gene Ontology	18	940	0.00340315	0.0291232	10140|57551|26118|7091|5610|317|8850|672|1111|252983|83695|192670|5519|546|51592|2821|23545|51763	http://amigo.geneontology.org/amigo/term/GO:0007165
hsa-miR-411-5p	GO:0030036	BP	actin cytoskeleton organization	Gene Ontology	5	105	0.00345399	0.0294536	10787|121512|7094|51804|11252	http://amigo.geneontology.org/amigo/term/GO:0030036
hsa-miR-411-5p	GO:0009725	BP	response to hormone	Gene Ontology	6	153	0.00352334	0.029939	302|672|9440|10628|4478|9852	http://amigo.geneontology.org/amigo/term/GO:0009725
hsa-miR-411-5p	GO:0072665	BP	protein localization to vacuole	Gene Ontology	2	8	0.00356391	0.0299667	7879|64089	http://amigo.geneontology.org/amigo/term/GO:0072665
hsa-miR-411-5p	GO:1901222	BP	regulation of NIK/NF-kappaB signaling	Gene Ontology	2	8	0.00356391	0.0299667	5610|9618	http://amigo.geneontology.org/amigo/term/GO:1901222
hsa-miR-411-5p	GO:0016817	MF	hydrolase activity, acting on acid anhydrides	Gene Ontology	7	206	0.00359475	0.0301209	2935|9367|57679|23011|546|2186|10105	http://amigo.geneontology.org/amigo/term/GO:0016817
hsa-miR-411-5p	GO:0000819	BP	sister chromatid segregation	Gene Ontology	3	31	0.00366171	0.0305227	90417|57551|546	http://amigo.geneontology.org/amigo/term/GO:0000819
hsa-miR-411-5p	GO:0016569	BP	covalent chromatin modification	Gene Ontology	4	65	0.00370436	0.0307187	10013|4089|23429|339287	http://amigo.geneontology.org/amigo/term/GO:0016569
hsa-miR-411-5p	GO:0003723	MF	RNA binding	Gene Ontology	6	155	0.00374544	0.0307944	10772|11100|2935|27316|549|7884	http://amigo.geneontology.org/amigo/term/GO:0003723
hsa-miR-411-5p	GO:0016032	BP	viral process	Gene Ontology	5	107	0.00373059	0.0307944	5610|5431|8850|3836|51763	http://amigo.geneontology.org/amigo/term/GO:0016032
hsa-miR-411-5p	GO:0022603	BP	regulation of anatomical structure morphogenesis	Gene Ontology	6	156	0.0038603	0.0316309	4131|102800317|27086|4478|121512|55660	http://amigo.geneontology.org/amigo/term/GO:0022603
hsa-miR-411-5p	GO:0043168	MF	anion binding	Gene Ontology	11	454	0.00396024	0.0319981	24137|6016|80205|11252|59338|10730|51552|1454|79738|84617|302	http://amigo.geneontology.org/amigo/term/GO:0043168
hsa-miR-411-5p	GO:0006413	BP	translational initiation	Gene Ontology	3	32	0.00397817	0.0319981	1964|5610|51441	http://amigo.geneontology.org/amigo/term/GO:0006413
hsa-miR-411-5p	GO:2001235	BP	positive regulation of apoptotic signaling pathway	Gene Ontology	3	32	0.00397817	0.0319981	10105|10018|10962	http://amigo.geneontology.org/amigo/term/GO:2001235
hsa-miR-411-5p	GO:0032550	MF	purine ribonucleoside binding	Gene Ontology	4	67	0.00410466	0.0328509	6016|2935|7879|51552	http://amigo.geneontology.org/amigo/term/GO:0032550
hsa-miR-411-5p	GO:0009893	BP	positive regulation of metabolic process	Gene Ontology	11	457	0.00415355	0.0331321	23326|7707|4089|102800317|546|5194|1763|55870|7879|51441|55905	http://amigo.geneontology.org/amigo/term/GO:0009893
hsa-miR-411-5p	GO:0005938	CC	cell cortex	Gene Ontology	3	33	0.00431078	0.0331733	10979|10097|54443	http://amigo.geneontology.org/amigo/term/GO:0005938
hsa-miR-411-5p	GO:0019899	MF	enzyme binding	Gene Ontology	9	330	0.00423516	0.0331733	5586|10527|57695|11100|11236|10013|9495|23545|55905	http://amigo.geneontology.org/amigo/term/GO:0019899
hsa-miR-411-5p	GO:0010212	BP	response to ionizing radiation	Gene Ontology	3	33	0.00431078	0.0331733	83695|9575|672	http://amigo.geneontology.org/amigo/term/GO:0010212
hsa-miR-411-5p	GO:0030521	BP	androgen receptor signaling pathway	Gene Ontology	2	9	0.00432968	0.0331733	10013|27086	http://amigo.geneontology.org/amigo/term/GO:0030521
hsa-miR-411-5p	GO:0043149	BP	stress fiber assembly	Gene Ontology	2	9	0.00432968	0.0331733	8500|51763	http://amigo.geneontology.org/amigo/term/GO:0043149
hsa-miR-411-5p	GO:0051452	BP	intracellular pH reduction	Gene Ontology	2	9	0.00432968	0.0331733	7879|54982	http://amigo.geneontology.org/amigo/term/GO:0051452
hsa-miR-411-5p	GO:0061640	BP	cytoskeleton-dependent cytokinesis	Gene Ontology	2	9	0.00432968	0.0331733	10097|54443	http://amigo.geneontology.org/amigo/term/GO:0061640
hsa-miR-411-5p	GO:1902041	BP	regulation of extrinsic apoptotic signaling pathway via death domain receptors	Gene Ontology	2	9	0.00432968	0.0331733	672|841	http://amigo.geneontology.org/amigo/term/GO:1902041
hsa-miR-411-5p	GO:0006397	BP	mRNA processing	Gene Ontology	4	69	0.00453321	0.0344495	27316|494115|10450|3189	http://amigo.geneontology.org/amigo/term/GO:0006397
hsa-miR-411-5p	GO:0016020	CC	membrane	Gene Ontology	24	1443	0.00460672	0.0348147	3920|2194|255919|2309|27|91452|148362|57679|4820|2821|7414|157378|27089|9440|10787|55863|8793|8417|55117|841|57720|56262|3842|1000	http://amigo.geneontology.org/amigo/term/GO:0016020
hsa-miR-411-5p	GO:0031323	BP	regulation of cellular metabolic process	Gene Ontology	18	969	0.00461739	0.0348147	23326|4899|27|10962|5718|1843|10772|22863|7879|342892|4478|10450|7539|7025|10605|26053|9495|8669	http://amigo.geneontology.org/amigo/term/GO:0031323
hsa-miR-411-5p	GO:0010562	BP	positive regulation of phosphorus metabolic process	Gene Ontology	6	163	0.00473883	0.035398	56034|5604|7436|80829|4659|1000	http://amigo.geneontology.org/amigo/term/GO:0010562
hsa-miR-411-5p	GO:0043228	CC	non-membrane-bounded organelle	Gene Ontology	13	606	0.00493743	0.0367107	79989|7094|55362|57679|55055|9618|64979|546|252983|84617|10013|5888|5884	http://amigo.geneontology.org/amigo/term/GO:0043228
hsa-miR-411-5p	GO:0008380	BP	RNA splicing	Gene Ontology	4	71	0.00499088	0.0369371	27316|23450|10772|23064	http://amigo.geneontology.org/amigo/term/GO:0008380
hsa-miR-411-5p	GO:1904923	BP	regulation of autophagy of mitochondrion in response to mitochondrial depolarization	Gene Ontology	3	35	0.00502533	0.0370215	22863|5604|51306	http://amigo.geneontology.org/amigo/term/GO:1904923
hsa-miR-411-5p	GO:0007006	BP	mitochondrial membrane organization	Gene Ontology	2	10	0.00516438	0.037643	3320|139322	http://amigo.geneontology.org/amigo/term/GO:0007006
hsa-miR-411-5p	GO:0032588	CC	trans-Golgi network membrane	Gene Ontology	2	10	0.00516438	0.037643	23431|22796	http://amigo.geneontology.org/amigo/term/GO:0032588
hsa-miR-411-5p	GO:1903312	BP	negative regulation of mRNA metabolic process	Gene Ontology	2	10	0.00516438	0.037643	27316|10772	http://amigo.geneontology.org/amigo/term/GO:1903312
hsa-miR-411-5p	GO:0006325	BP	chromatin organization	Gene Ontology	5	117	0.00535583	0.0388036	10013|4089|8289|57504|26053	http://amigo.geneontology.org/amigo/term/GO:0006325
hsa-miR-411-5p	GO:0015931	BP	nucleobase-containing compound transport	Gene Ontology	3	37	0.00580712	0.041635	81608|10772|55706	http://amigo.geneontology.org/amigo/term/GO:0015931
hsa-miR-411-5p	GO:1903507	BP	negative regulation of nucleic acid-templated transcription	Gene Ontology	6	171	0.00591365	0.0422103	7091|672|7436|57504|2186|7025	http://amigo.geneontology.org/amigo/term/GO:1903507
hsa-miR-411-5p	GO:0023056	BP	positive regulation of signaling	Gene Ontology	7	227	0.00596561	0.0424554	5519|841|10206|10018|5213|10105|4616	http://amigo.geneontology.org/amigo/term/GO:0023056
hsa-miR-411-5p	GO:0006970	BP	response to osmotic stress	Gene Ontology	2	11	0.00606669	0.0428481	3320|56262	http://amigo.geneontology.org/amigo/term/GO:0006970
hsa-miR-411-5p	GO:0045859	BP	regulation of protein kinase activity	Gene Ontology	5	121	0.00612761	0.043099	6895|10645|57679|151242|4616	http://amigo.geneontology.org/amigo/term/GO:0045859
hsa-miR-411-5p	GO:0010556	BP	regulation of macromolecule biosynthetic process	Gene Ontology	13	623	0.00614805	0.0431169	221937|26586|1964|10645|9440|96459|2186|23082|1763|7748|51592|9994|11236	http://amigo.geneontology.org/amigo/term/GO:0010556
hsa-miR-411-5p	GO:0000086	BP	G2/M transition of mitotic cell cycle	Gene Ontology	3	38	0.00622374	0.0432661	1454|1647|4659	http://amigo.geneontology.org/amigo/term/GO:0000086
hsa-miR-411-5p	GO:0006082	BP	organic acid metabolic process	Gene Ontology	6	173	0.0062378	0.0432661	5718|5194|390916|51449|2821|1462	http://amigo.geneontology.org/amigo/term/GO:0006082
hsa-miR-411-5p	GO:0097367	MF	carbohydrate derivative binding	Gene Ontology	9	351	0.00621108	0.0432661	127933|27|10097|6595|317|140609|79738|5888|9223	http://amigo.geneontology.org/amigo/term/GO:0097367
hsa-miR-411-5p	GO:0015711	BP	organic anion transport	Gene Ontology	4	76	0.0062681	0.0432661	6573|55117|6541|151473	http://amigo.geneontology.org/amigo/term/GO:0015711
hsa-miR-411-5p	GO:0031098	BP	stress-activated protein kinase signaling cascade	Gene Ontology	3	39	0.00665775	0.0453707	5604|57551|4616	http://amigo.geneontology.org/amigo/term/GO:0031098
hsa-miR-411-5p	GO:0090287	BP	regulation of cellular response to growth factor stimulus	Gene Ontology	3	39	0.00665775	0.0453707	10140|51592|3309	http://amigo.geneontology.org/amigo/term/GO:0090287
hsa-miR-411-5p	GO:0048066	BP	developmental pigmentation	Gene Ontology	2	12	0.00703532	0.047341	10018|26258	http://amigo.geneontology.org/amigo/term/GO:0048066
hsa-miR-411-5p	GO:0070126	BP	mitochondrial translational termination	Gene Ontology	2	12	0.00703532	0.047341	54460|60488	http://amigo.geneontology.org/amigo/term/GO:0070126
hsa-miR-411-5p	GO:0045184	BP	establishment of protein localization	Gene Ontology	8	295	0.00705598	0.0473478	27086|127933|5194|51552|3320|51763|29107|23011	http://amigo.geneontology.org/amigo/term/GO:0045184
hsa-miR-411-5p	GO:1990904	CC	ribonucleoprotein complex	Gene Ontology	4	79	0.00712977	0.047381	51018|10480|1659|220988	http://amigo.geneontology.org/amigo/term/GO:1990904
hsa-miR-411-5p	GO:0001934	BP	positive regulation of protein phosphorylation	Gene Ontology	5	126	0.00719823	0.0476388	22863|302|1000|904|4616	http://amigo.geneontology.org/amigo/term/GO:0001934
hsa-miR-497-5p	GO:0009987	BP	cellular process	Gene Ontology	225	2484	1.34581e-33	4.20385e-30	2965|3921|1147|23047|23042|55187|27042|7220|3658|10105|221937|6874|22836|79863|55421|55290|1545|57826|142940|51170|51573|3796|160760|147841|5903|80331|51363|55617|128|23294|79703|192669|9063|8435|51283|54207|5144|5069|23478|11275|7126|9987|9980|10196|84336|255967|51375|132|4739|64093|6651|5693|131870|84230|291|9261|6117|595|10327|6597|55527|64762|124583|984|23266|8445|585|94134|3673|9140|25888|31…	http://amigo.geneontology.org/amigo/term/GO:0009987
hsa-miR-497-5p	GO:0005622	CC	intracellular	Gene Ontology	204	2228	6.19044e-31	9.66844e-28	127018|3716|53354|1780|57826|23516|132|6903|64061|5471|6877|10695|60682|55421|8021|8092|120863|4673|160760|92014|7693|163486|23294|85015|79703|192669|400|4335|23076|9377|710|84733|23277|5469|9987|51444|5515|91056|3987|83538|29123|92259|51166|259230|7317|4134|25896|10198|6929|84705|25957|1660|9263|595|3916|100272147|10730|6385|5604|9149|94134|7871|51517|6609|3145|5818|57610|5255|5562|65008|898|544…	http://amigo.geneontology.org/amigo/term/GO:0005622
hsa-miR-497-5p	GO:0043226	CC	organelle	Gene Ontology	185	2086	1.75046e-26	1.82262e-23	79982|23042|55509|3659|6879|9987|6877|60684|376267|22836|220002|8804|1545|51170|160|6477|85465|160760|10959|403|3998|23294|85015|80025|55572|10526|64105|3480|23175|79447|11275|367|7126|64710|8021|23370|81620|80034|10818|10195|29123|51166|4735|259230|7317|3842|84230|64145|1660|4329|83932|56181|6597|84444|8545|64207|9149|3145|51517|112|23269|138639|6510|4720|65008|29916|51754|55740|2072|2260|1901|6…	http://amigo.geneontology.org/amigo/term/GO:0043226
hsa-miR-497-5p	GO:0044237	BP	cellular metabolic process	Gene Ontology	162	1718	9.39732e-26	8.00566e-23	9204|211|10564|3320|132|5471|8848|4705|27|51303|55052|4141|7514|7693|25942|56252|57147|10521|56623|57693|28987|5463|8331|7128|10114|51444|10196|51166|259230|7317|26168|131870|23248|55585|8031|10327|56180|8239|200014|84444|8445|5601|3145|6383|3673|22913|5608|8323|22921|51191|55225|5563|8804|51752|23170|10606|55929|7730|4214|58486|8867|9567|2932|8454|23483|5129|103|3312|23545|284996|22869|84271|557…	http://amigo.geneontology.org/amigo/term/GO:0044237
hsa-miR-497-5p	GO:0005488	MF	binding	Gene Ontology	190	2247	6.27653e-25	3.92116e-22	3920|54458|55500|154214|90321|120114|9209|128|23360|3659|6877|1857|55290|56896|4677|11261|160760|26015|55766|29916|63967|79701|80759|51281|1399|51283|5144|5069|710|10116|9987|51444|7049|23035|4739|164832|192670|84548|5917|54926|2066|92797|23469|55527|2774|124583|23266|11200|64207|7871|6383|112|5494|8323|268|353274|10979|79803|116224|5563|9783|51209|55038|2020|83540|1654|27173|11269|22908|112487|8…	http://amigo.geneontology.org/amigo/term/GO:0005488
hsa-miR-497-5p	GO:0043231	CC	intracellular membrane-bounded organelle	Gene Ontology	152	1606	2.52016e-24	1.24297e-21	3920|1147|1780|661|3320|5469|26286|10105|1857|10695|1831|56893|85460|51524|11261|10890|92014|64718|55596|9063|199692|3480|8634|9377|10116|51164|6992|81620|91056|90441|3796|84333|167227|83700|55585|50813|2066|6594|23466|56180|200014|10730|11200|55832|7871|9529|9913|51199|10979|79803|23087|26258|81029|367|1650|9469|1654|54890|10131|2932|4218|55720|5499|55291|9441|103|22868|8895|23064|51107|51588|79…	http://amigo.geneontology.org/amigo/term/GO:0043231
hsa-miR-497-5p	GO:0043229	CC	intracellular organelle	Gene Ontology	165	1863	1.46202e-23	6.22753e-21	130340|10087|55854|2650|91689|10290|342371|11338|80829|6874|10695|376267|9772|285362|11269|6648|57826|3643|6184|3998|9681|100529215|2247|56252|57728|996|57693|11275|4034|6095|51441|10196|51375|9639|25897|5728|378|51763|90204|84705|92797|133619|64768|7311|200014|2776|5601|2820|196528|51199|26015|51209|1399|4967|134353|55256|585|580|3662|11215|10788|9392|2040|8897|5531|90381|23064|51107|79191|27092…	http://amigo.geneontology.org/amigo/term/GO:0043229
hsa-miR-497-5p	GO:0060255	BP	regulation of macromolecule metabolic process	Gene Ontology	105	957	3.29686e-21	1.10339e-18	54458|1147|90321|9209|55509|64061|92797|6874|55291|8092|11261|167153|55762|5903|405|7514|9567|25942|6157|10116|9987|268|90441|84333|167227|22843|1386|1660|8031|23466|64762|84444|728642|2768|5494|8323|1859|9913|367|4214|585|10131|55802|57181|114803|27250|22863|5575|51351|7422|9126|65056|6929|1871|342357|80778|347344|3454|10628|10959|10621|2117|54165|5118|7008|9586|91|4602|4603|143384|84101|51776|1…	http://amigo.geneontology.org/amigo/term/GO:0060255
hsa-miR-497-5p	GO:0043170	BP	macromolecule metabolic process	Gene Ontology	132	1440	4.23287e-20	1.16665e-17	3920|50488|1147|2650|55186|7818|132|92797|4335|7812|85460|26574|9830|4141|161742|167153|11016|2247|92715|8220|10521|3480|8634|5069|55625|23478|441478|11275|143384|8335|7049|81620|80034|10818|5599|57763|192670|55589|5917|55585|9261|862|6594|55243|596|200014|84444|4090|7975|5608|140890|2260|3667|10131|580|1133|8202|5129|80851|5775|6239|908|55008|2674|160|415116|11261|55005|9126|6477|2619|25782|1875…	http://amigo.geneontology.org/amigo/term/GO:0043170
hsa-miR-497-5p	GO:0065007	BP	biological regulation	Gene Ontology	153	1832	1.21302e-19	3.15757e-17	9204|23512|10290|3658|6879|376267|22836|60682|8867|55290|8092|56893|9830|4673|8490|163486|23294|10669|10526|8435|56994|4335|710|3400|8331|7128|367|10116|81620|51441|23175|84333|6655|9908|116496|378|83700|131870|498|55585|595|23466|8239|2774|6385|8445|4644|6609|7975|25888|8131|1859|830|353274|2030|54469|8804|9783|26258|7431|27303|523|84733|2072|55742|4214|84458|6584|55929|2932|4218|259295|3312|835…	http://amigo.geneontology.org/amigo/term/GO:0065007
hsa-miR-497-5p	GO:0044267	BP	cellular protein metabolic process	Gene Ontology	86	726	2.02933e-19	5.00444e-17	2965|23511|2650|55186|7818|92399|7126|957|6879|6877|80829|253980|55291|4677|161742|160760|25948|23112|9567|9683|10818|92715|998|710|7128|128|10845|5599|7317|5693|4486|192670|54926|2066|291|152559|84444|984|286148|9149|3145|9913|1650|147339|3667|2932|3156|8897|5575|8813|7422|54495|56916|9874|2889|254887|84193|5781|54813|284439|6208|10152|54165|9134|375743|3720|80174|22863|6197|114803|4082|550|5527…	http://amigo.geneontology.org/amigo/term/GO:0044267
hsa-miR-497-5p	GO:0005737	CC	cytoplasm	Gene Ontology	141	1641	3.95987e-19	9.27698e-17	217|50488|211|1780|7818|92399|580|64061|1857|10695|56896|3799|57826|55294|4677|10890|4141|161742|92014|56259|9567|29916|55905|80025|996|998|11276|22921|23370|91056|1994|57728|22849|4739|9908|4486|55750|8030|56181|2773|124583|728642|5601|7871|5166|100505876|55225|5563|2665|26258|54529|55742|79663|2936|4218|112487|6670|23255|11215|103|9647|80851|79036|4644|1642|4297|5872|51107|359845|291|140901|104…	http://amigo.geneontology.org/amigo/term/GO:0005737
hsa-miR-497-5p	GO:0005634	CC	nucleus	Gene Ontology	113	1182	1.49011e-18	3.32472e-16	9204|54458|55854|211|10290|7818|27042|28996|83932|10691|490|9772|253980|167153|8493|5903|26273|56259|23294|85015|64710|11180|996|199692|118924|8335|55905|2551|4735|5599|57763|6651|26168|55589|64105|6929|5917|4739|2776|286148|8445|58487|55832|23269|196528|5565|55421|55038|84733|134353|54890|9529|79364|8697|81611|9410|80119|83640|80347|127933|10379|10383|56916|54956|51343|3516|6041|10910|84056|2315…	http://amigo.geneontology.org/amigo/term/GO:0005634
hsa-miR-497-5p	GO:0003824	MF	catalytic activity	Gene Ontology	111	1162	3.22036e-18	6.85862e-16	54726|50488|23512|2650|767|9474|80851|5471|60682|11269|27|3798|142940|10890|1778|26273|163486|92715|10521|5144|10195|6717|80034|147339|284131|5693|63929|8237|6821|984|11200|55832|5494|1859|9913|138639|171586|4720|27304|2665|4967|1901|4214|2932|5129|51504|8450|23259|10788|79699|27250|8897|5575|36|6050|4953|3098|3796|60528|29940|57406|114034|11227|79828|3312|54956|6597|3516|254887|10910|54813|60558…	http://amigo.geneontology.org/amigo/term/GO:0003824
hsa-miR-497-5p	GO:0044249	BP	cellular biosynthetic process	Gene Ontology	99	984	1.02899e-17	2.09624e-15	55500|7818|498|3659|83932|6877|221937|56894|1831|85460|26574|9830|85465|55762|405|55766|23112|25942|64710|9063|10521|56623|22921|6157|7126|9987|6095|2551|25896|4644|3720|1386|595|84444|728642|64207|55832|112|23175|192669|7730|84458|51504|136319|3312|6426|51351|518|51586|80347|1875|6594|3164|10628|6208|10625|2117|9134|23528|3609|3070|91|23438|160|4603|10818|1994|6197|79364|114803|1741|10678|4088|1…	http://amigo.geneontology.org/amigo/term/GO:0044249
hsa-miR-497-5p	GO:0071704	BP	organic substance metabolic process	Gene Ontology	138	1671	2.1e-17	4.09981e-15	2965|3921|23511|5604|55186|10290|5469|3659|6879|56894|56893|85465|64718|85015|56252|80025|92715|8220|10521|3480|375743|10285|5463|9826|9700|9987|7049|1650|55905|10195|5599|9469|6651|131870|9263|64768|596|23469|11200|55832|6383|22913|1859|26155|353274|79960|55421|10606|27303|23175|4967|2260|64919|6821|3667|580|3662|5324|3156|22907|284996|85235|9392|4296|7374|80347|79677|222236|1871|10558|1901|1738…	http://amigo.geneontology.org/amigo/term/GO:0071704
hsa-miR-497-5p	GO:0050789	BP	regulation of biological process	Gene Ontology	142	1778	9.30642e-17	1.74421e-14	23511|9209|83932|221937|490|22836|1831|55294|55766|10587|9567|23294|56252|199692|3480|5144|23076|9700|51444|7049|51441|80034|4739|25897|4644|51763|55589|2066|6594|56180|7311|8239|64762|23266|5604|64207|5494|201627|196528|353274|8804|3588|7431|2260|6303|585|9529|9258|2936|64145|3742|55291|6670|11215|3313|6239|85235|56893|54207|8897|7374|23385|359845|51586|8727|10413|8507|65056|1875|1871|9874|1654|…	http://amigo.geneontology.org/amigo/term/GO:0050789
hsa-miR-497-5p	GO:0031323	BP	regulation of cellular metabolic process	Gene Ontology	95	969	2.17016e-16	3.91088e-14	54458|64061|92797|10691|27|56893|405|55766|25942|9063|6992|57693|22921|7128|51444|10845|80034|4486|1386|9263|152559|6594|55527|5494|25888|1859|831|5563|8804|523|2071|58486|9529|580|55929|5324|1831|286205|80851|22980|79753|2040|27250|22863|5575|51351|79191|283106|79576|25782|6929|10558|1738|347344|2889|8614|5781|10621|7337|754|57082|11338|55787|160|4603|359948|80174|57649|6197|1600|114803|4297|408…	http://amigo.geneontology.org/amigo/term/GO:0031323
hsa-miR-497-5p	GO:0036211	BP	protein modification process	Gene Ontology	74	643	2.84824e-16	4.76622e-14	2965|152559|4082|3716|8237|3065|55243|9757|84444|6385|10105|64326|55832|26354|83932|6877|9140|3301|1859|9913|8945|51303|7841|7267|6197|161742|5562|1857|219771|6041|84193|9958|5922|1650|5144|4842|92715|122830|54165|3600|1399|51776|51719|54467|3609|2932|5165|6732|150465|8450|3667|54956|10114|5538|9748|89122|4139|143384|10461|728642|1600|4297|1457|5283|8816|79739|7468|2674|351|2339|29101|54926|2066|…	http://amigo.geneontology.org/amigo/term/GO:0036211
hsa-miR-497-5p	GO:1901576	BP	organic substance biosynthetic process	Gene Ontology	96	990	2.83477e-16	4.76622e-14	9204|211|7818|498|8848|55290|51170|11261|4673|54851|55762|92014|55766|56252|92715|8335|79576|3643|81620|6299|2066|9261|10327|56180|23469|984|6385|728642|55832|25888|5608|51360|5562|2260|9469|64750|8202|22908|6670|51504|5813|908|90381|518|80119|54828|23063|53354|8509|285527|23248|56916|6609|342357|347344|596|10628|284439|10621|57798|54778|226|4603|1026|57649|57763|5226|1107|1457|2020|84271|51804|4…	http://amigo.geneontology.org/amigo/term/GO:1901576
hsa-miR-497-5p	GO:0048518	BP	positive regulation of biological process	Gene Ontology	87	845	3.04996e-16	4.92779e-14	2965|3799|9830|23112|9567|25942|29126|3480|710|55824|219699|7128|9700|6717|51444|2071|55905|84336|7311|116496|1875|9263|9261|124583|112|5494|3673|6780|1857|9783|27303|2260|134353|585|6584|3156|23255|8450|219771|79753|27250|4297|4296|7374|23064|51588|7422|55005|154214|283106|9639|153129|6929|54956|2889|10628|5781|10621|10318|54165|375056|3609|545|9586|8471|6299|27032|6197|255488|139285|10670|23332…	http://amigo.geneontology.org/amigo/term/GO:0048518
hsa-miR-497-5p	GO:0005515	MF	protein binding	Gene Ontology	135	1688	5.16359e-16	8.06467e-14	54726|55854|211|23047|143384|10290|7818|11052|6879|1857|285362|51444|8507|11261|1778|403|3998|81029|10526|9063|51283|767|8330|22921|10116|6717|268|7049|22849|25896|9908|131870|1654|10618|1386|1660|6117|6594|8030|200014|6385|2768|55832|5499|9140|25888|23269|196528|5563|8804|9783|51209|7431|54529|1650|6303|58487|3588|80012|6670|51504|80851|22980|57589|388630|908|54433|23382|8813|55005|286205|113251…	http://amigo.geneontology.org/amigo/term/GO:0005515
hsa-miR-497-5p	GO:0043412	BP	macromolecule modification	Gene Ontology	74	652	5.54481e-16	8.38072e-14	2965|51400|50488|596|3667|83593|84444|984|286148|9757|5604|3716|5499|6879|112|5494|79739|54583|55291|8945|1191|7841|11261|10270|10087|8493|8813|2071|57154|122830|4214|54165|4087|7317|1613|51701|898|3480|3609|10645|8202|550|114799|754|9219|51504|8450|91|388630|120892|51444|5775|57181|23192|55905|284996|4139|1026|51256|25998|1642|2889|6385|11062|5531|57171|378|26168|25836|9577|51763|65975|55585|549…	http://amigo.geneontology.org/amigo/term/GO:0043412
hsa-miR-497-5p	GO:0019538	BP	protein metabolic process	Gene Ontology	90	911	9.05989e-16	1.32657e-13	3921|127933|23512|9474|128|54726|27|51303|26574|161742|10015|64718|9683|25942|51283|55625|7128|7126|51444|5515|55905|22849|7311|5693|26168|152559|9261|595|8239|55527|64762|84444|1859|4486|2260|9469|8202|55291|8453|6670|80851|8357|23279|51429|22863|8895|130399|51107|2674|55005|140901|283459|8509|79659|5708|10116|84340|375743|124583|23438|4602|9867|143384|1994|255488|3998|9459|139285|5648|153222|78…	http://amigo.geneontology.org/amigo/term/GO:0019538
hsa-miR-497-5p	GO:0006464	BP	cellular protein modification process	Gene Ontology	70	607	1.67684e-15	2.34532e-13	5515|152559|4082|51400|3065|8507|79677|23511|139285|2650|3667|9757|128|3600|5601|9354|6877|5608|26155|55243|79960|5903|25782|4602|11261|51343|6477|5563|25948|23014|545|84733|2260|26118|154214|63967|51763|122830|23523|996|894|580|754|898|5283|6117|8202|4254|55625|998|5531|6670|7126|10114|3720|219771|10818|1026|1642|8895|2342|22843|7841|57171|55008|9883|2674|22881|7465|3156	http://amigo.geneontology.org/amigo/term/GO:0006464
hsa-miR-497-5p	GO:0043227	CC	membrane-bounded organelle	Gene Ontology	151	2030	2.55544e-15	3.421e-13	9204|55854|55500|1780|23047|23512|55509|9700|23360|221937|154810|79863|56893|51573|10890|4141|1778|10576|55762|51776|26273|3998|57147|23076|23478|11276|22921|128|80174|57728|29126|10195|84333|90441|51166|83463|23195|63929|55750|6856|595|56181|100272147|2774|10730|6385|3673|8323|3301|1859|830|57610|100505876|5563|55742|55654|580|57171|51504|8450|23259|6239|7703|81611|22863|8895|10980|116138|80119|…	http://amigo.geneontology.org/amigo/term/GO:0043227
hsa-miR-497-5p	GO:1902494	CC	catalytic complex	Gene Ontology	37	184	4.08444e-15	5.31601e-13	5515|9612|25897|1783|8445|3065|6877|22913|79960|25847|3643|9810|54433|51719|5563|6184|80335|892|996|375743|6992|5286|8454|5469|3703|3720|6426|22863|115752|51013|5573|5255|1107|51588|23001|192670|115290	http://amigo.geneontology.org/amigo/term/GO:1902494
hsa-miR-497-5p	GO:0005829	CC	cytosol	Gene Ontology	64	531	4.33523e-15	5.48993e-13	127018|26960|9126|10526|79571|51191|54477|9181|3667|60|5604|3659|5527|23243|4677|2982|11261|9817|4141|161742|5562|5563|9897|51209|7431|10910|23382|81620|22820|5861|139285|1654|3628|10564|4090|3831|26958|56623|9527|998|90441|8454|5537|8450|6717|5538|9045|1994|64326|27113|167227|10095|27250|5471|1600|26118|116138|9807|9628|8239|5565|55585|1975|2066	http://amigo.geneontology.org/amigo/term/GO:0005829
hsa-miR-497-5p	GO:0048519	BP	negative regulation of biological process	Gene Ontology	80	777	4.93575e-15	6.08591e-13	53373|3921|10413|56180|4088|83593|63967|10461|143686|79094|57406|9757|91|80712|498|653464|6609|8545|9612|221937|23087|26297|259266|57713|1831|5708|79960|2982|3662|3516|5562|8131|5048|8925|7514|7431|5922|3014|367|81620|5813|23512|192669|22980|84458|23607|10131|580|9134|22843|3875|53349|54828|1545|8453|286205|2072|7126|388630|120892|7049|4791|4152|2551|1026|4170|51232|25998|51013|6651|10625|51776|8…	http://amigo.geneontology.org/amigo/term/GO:0048519
hsa-miR-497-5p	GO:0006725	BP	cellular aromatic compound metabolic process	Gene Ontology	88	913	7.10382e-15	8.53461e-13	2965|9209|5562|9987|221937|8021|8092|55294|4677|55762|25942|54913|80025|9063|57693|5463|7128|8335|6717|79576|5515|5599|5693|1386|4329|9261|6594|55526|984|55832|22913|1859|9913|353274|226|285268|8804|84733|367|284131|580|112487|103|22980|220963|908|51351|54433|7422|127933|285527|56919|1901|80778|3454|11016|10628|84193|253461|10318|55273|9586|9584|91|11338|268|9392|57763|865|1107|90381|26512|25888|…	http://amigo.geneontology.org/amigo/term/GO:0006725
hsa-miR-497-5p	GO:0034641	BP	cellular nitrogen compound metabolic process	Gene Ontology	94	1017	8.60066e-15	1.00746e-12	8634|1147|211|23512|55509|7049|28996|498|79863|8092|5515|405|2247|85015|92715|5144|10285|23076|23478|3643|22849|51166|1875|2254|11062|595|23466|6597|7975|51360|54932|2072|2260|58487|84515|2936|8453|8450|57826|6426|85235|27250|5573|3014|23064|80347|55005|79677|8050|60528|6603|11222|1738|342357|7091|11016|84193|84340|10621|253461|23524|1355|10560|23438|4602|55388|359948|57649|6117|79365|51804|4087|…	http://amigo.geneontology.org/amigo/term/GO:0034641
hsa-miR-497-5p	GO:0008152	BP	metabolic process	Gene Ontology	132	1706	1.15203e-14	1.31654e-12	2650|9474|1613|498|5471|221937|56894|27|142940|51170|9867|9567|8904|9683|2247|79703|92715|54583|9063|996|199692|6992|123283|441478|84733|8330|7818|6717|268|55905|9469|50|4644|65975|55585|4329|90025|10327|2773|10730|64207|9149|5499|6383|6609|3673|54932|51191|1857|8804|10606|4967|2260|64919|55256|6821|7074|580|64750|55720|1545|286205|8450|9647|3312|57181|6426|85235|8897|3708|3014|23064|127933|29940…	http://amigo.geneontology.org/amigo/term/GO:0008152
hsa-miR-497-5p	GO:0019222	BP	regulation of metabolic process	Gene Ontology	91	974	1.31399e-14	1.44863e-12	3921|55617|64061|9987|10105|253980|27|6648|26574|10959|55766|23112|100529215|92715|5144|6717|8021|22849|90441|55291|5599|4486|9577|2254|2066|64762|5604|7975|5608|23269|26155|56603|5562|523|2260|7730|8202|55217|22881|1831|8453|6934|136319|284996|57589|1432|27250|22863|4297|51588|23063|51586|283106|65056|2619|25782|6603|9321|3454|11016|51343|51347|6041|8611|23152|10318|54165|3600|754|54566|120892|8…	http://amigo.geneontology.org/amigo/term/GO:0019222
hsa-miR-497-5p	GO:0016043	BP	cellular component organization	Gene Ontology	88	936	2.62452e-14	2.82694e-12	3921|9474|28996|92797|6879|5471|8867|1545|55294|3643|55052|147841|51776|55766|25942|10669|996|3831|23277|150465|7818|7126|5515|9980|10196|4735|56181|203547|10730|728642|9780|9783|55740|367|1654|8202|23259|3312|1432|2040|1642|3014|23063|283106|3755|3800|23710|1901|977|286527|4943|23332|10564|91|120892|7840|2247|84101|1457|8664|55654|114803|55142|10490|4082|79659|55201|3065|6623|9221|1191|1613|5193…	http://amigo.geneontology.org/amigo/term/GO:0016043
hsa-miR-497-5p	GO:0031974	CC	membrane-enclosed lumen	Gene Ontology	73	697	3.63798e-14	3.83051e-12	140901|55854|55500|140890|79677|311|55341|92399|6385|8566|11052|36|9063|10000|26515|5608|1859|4705|64768|79960|10845|2976|55052|3796|23523|3516|26512|10628|710|7741|57649|56259|367|8357|54477|1654|28996|55198|57713|351|10521|3662|55379|9913|60|23076|5830|103|23438|4602|147841|1994|4152|51701|6426|22868|167227|25998|64326|84101|80174|1457|25896|80119|3842|6239|7422|27042|129607|7182|84271|51586|80…	http://amigo.geneontology.org/amigo/term/GO:0031974
hsa-miR-497-5p	GO:0051173	BP	positive regulation of nitrogen compound metabolic process	Gene Ontology	55	436	6.9893e-14	6.96774e-12	154214|4082|8031|4891|54165|3320|25782|64207|5601|56916|10691|3673|9321|3159|1859|9913|8945|51360|7203|9817|5781|27303|5118|2071|2247|64919|63967|54778|580|3662|4254|54998|65056|3400|143384|3156|11338|120892|80174|64326|1026|84333|142679|6299|908|4296|54956|5728|7074|9577|51429|351|22881|84271|8939	http://amigo.geneontology.org/amigo/term/GO:0051173
hsa-miR-497-5p	GO:1901566	BP	organonitrogen compound biosynthetic process	Gene Ontology	45	301	6.84624e-14	6.96774e-12	53354|10166|4891|29940|79094|22849|498|5499|5471|3673|1738|1968|92014|5723|25782|27304|8611|23112|3998|26035|1650|6208|1654|92715|10131|56894|23175|79993|1355|124583|6934|136319|51441|5813|5832|8566|259230|7311|518|6197|8664|192670|5917|192669|55750	http://amigo.geneontology.org/amigo/term/GO:1901566
hsa-miR-497-5p	GO:0097159	MF	organic cyclic compound binding	Gene Ontology	81	845	1.13042e-13	1.10346e-11	140901|254251|9126|283459|90321|55526|200014|661|5631|27042|8566|8349|9149|10383|92797|6717|23424|9874|6874|5608|3301|10857|8867|140890|9921|353274|142940|28996|55052|3796|113251|4720|167153|5903|23170|403|9567|84056|23269|5861|5563|124540|51493|10152|4691|1783|5165|6780|285282|862|998|57693|3070|51347|7327|55788|5129|8450|103|3313|4603|9045|4152|2551|6426|84271|1432|10845|51166|6208|3420|1182|36…	http://amigo.geneontology.org/amigo/term/GO:0097159
hsa-miR-497-5p	GO:0070013	CC	intracellular organelle lumen	Gene Ontology	72	712	2.60937e-13	2.46994e-11	8991|595|8507|10270|8178|83590|11315|51433|9757|114034|8349|1875|3659|3065|6877|6609|26515|7374|3313|23243|253980|26155|23466|2976|161742|342371|405|10762|55573|57649|3014|26108|81620|55664|63967|80025|10526|58486|894|898|208|6117|23269|55720|710|6732|80174|226|10114|25790|4791|10370|9044|3320|92259|85235|81611|8545|11200|84101|4297|51013|36|9801|6050|23064|10921|63899|54878|84313|3981|2066	http://amigo.geneontology.org/amigo/term/GO:0070013
hsa-miR-497-5p	GO:0051641	BP	cellular localization	Gene Ontology	48	360	4.50496e-13	4.13883e-11	4082|51517|23511|9181|6745|6890|81562|498|3308|153222|11138|8867|51199|518|11014|10979|10087|1857|10628|55705|10762|9367|8905|55154|6208|4842|585|29959|208|10139|3708|7840|7074|51164|9392|25998|7311|161176|1741|5872|378|10921|7422|29928|2254|10959|2066|1660	http://amigo.geneontology.org/amigo/term/GO:0051641
hsa-miR-497-5p	GO:0044238	BP	primary metabolic process	Gene Ontology	120	1578	6.00749e-13	5.36155e-11	3716|23511|9209|10290|661|27042|28996|498|79863|56894|11269|1545|6648|142940|9748|11261|160760|25948|56259|2247|54913|8220|9063|10521|29940|11275|7818|23012|268|3643|80034|84333|167227|5599|259230|79739|55589|2254|54926|55750|4329|9261|64768|55527|9140|51363|831|55421|23170|9469|585|8202|2932|112487|8697|6239|8357|7703|115752|10980|7374|8813|3098|65056|285527|6929|54851|219333|9874|11222|92014|72…	http://amigo.geneontology.org/amigo/term/GO:0044238
hsa-miR-497-5p	GO:1901363	MF	heterocyclic compound binding	Gene Ontology	77	813	8.05377e-13	7.05344e-11	53354|10413|10270|9367|55526|11315|10290|55207|60|6899|5601|155435|10383|4644|153222|8545|9612|9874|109504726|9444|140612|8092|28996|2776|9810|51347|55762|23012|51209|7772|27303|9567|26015|100529215|5861|83463|192669|9258|4214|58486|4090|9529|84515|60558|523|255967|9441|5286|23277|55788|347344|79365|91|23195|3159|5917|22907|80034|3320|22869|1432|167227|3200|7317|51013|36|51351|6334|55225|7741|373…	http://amigo.geneontology.org/amigo/term/GO:1901363
hsa-miR-497-5p	GO:0044260	BP	cellular macromolecule metabolic process	Gene Ontology	103	1269	8.22371e-13	7.07013e-11	3921|55509|7049|64061|6879|221937|56893|5515|9830|6477|54851|167153|8493|7514|7693|192669|23478|150465|9987|10114|8021|6095|10196|10195|84333|9469|116496|4486|3658|5917|54926|8031|6385|728642|64207|5601|7975|138639|79960|51191|84733|64919|1654|9529|580|64750|8454|6934|136319|57181|90381|7374|23064|54433|55008|51504|283459|3516|6929|56919|347344|51343|51433|23012|10166|23152|29959|8772|60558|55273…	http://amigo.geneontology.org/amigo/term/GO:0044260
hsa-miR-497-5p	GO:2001141	BP	regulation of RNA biosynthetic process	Gene Ontology	65	621	9.54437e-13	8.05768e-11	4302|254251|1147|90321|8239|10379|54778|60468|6877|64061|3659|56916|9181|7975|3164|6874|3159|54583|1901|1111|9913|9321|8945|57826|3065|7091|1191|26574|5494|3516|55762|57531|7514|9958|2247|64710|10260|892|8772|51360|64750|23269|57713|65056|3070|7008|8453|204851|8335|7320|9647|268|5515|6934|2551|59336|85235|11200|3200|51058|51351|688|2005|79364|9921	http://amigo.geneontology.org/amigo/term/GO:2001141
hsa-miR-497-5p	GO:0016740	MF	transferase activity	Gene Ontology	55	474	1.45227e-12	1.1341e-10	9263|8050|50488|1147|2066|211|2650|9618|286148|3320|29968|6877|9874|120892|5165|85443|54956|1191|9354|9810|85465|1857|27304|80174|54813|2247|54778|894|351|5166|9134|898|1859|64750|998|8454|8453|204851|5469|3703|9647|90441|10196|142679|51232|5599|2339|5575|7074|7468|54625|255488|129607|4297|9926	http://amigo.geneontology.org/amigo/term/GO:0016740
hsa-miR-497-5p	GO:0032555	MF	purine ribonucleotide binding	Gene Ontology	42	292	1.44199e-12	1.1341e-10	9263|53354|127933|10670|55341|728642|498|26354|10576|490|22836|7327|10521|1111|27304|23012|51209|84340|9567|403|2260|1654|57147|205|5165|5166|998|2180|3643|9044|51701|8566|27032|5189|1107|9881|55589|65975|5917|5862|3980|54926	http://amigo.geneontology.org/amigo/term/GO:0032555
hsa-miR-497-5p	GO:0050794	BP	regulation of cellular process	Gene Ontology	120	1600	1.41245e-12	1.1341e-10	4302|50488|80829|60682|1545|57826|85460|26574|9830|8493|7514|403|10587|400|163486|192669|10526|1759|2850|55824|8021|2551|84333|167227|5599|25896|6651|5693|9577|192670|64750|79774|23466|2774|5604|64207|112|8131|6780|51360|6299|5316|2665|26258|27303|8395|131870|2260|58487|285282|259295|5324|8454|6670|23259|80851|388630|7703|8897|6732|81619|54828|51586|11261|80114|127933|10413|84894|25782|1875|56919…	http://amigo.geneontology.org/amigo/term/GO:0050794
hsa-miR-497-5p	GO:0043233	CC	organelle lumen	Gene Ontology	71	725	1.5343e-12	1.17852e-10	114785|4088|23047|54477|11222|607|79576|8566|5494|1386|3659|226|8545|5608|5165|285362|1859|55291|5708|10691|7091|1191|23360|51343|26512|1111|55201|7741|55573|80335|545|79188|26108|23512|10318|57798|23607|10625|10521|253980|2936|208|84733|3708|4799|6934|6239|6631|103|120892|147841|10370|22907|7703|6299|1642|5599|1600|8991|3014|8697|64744|57050|7468|63899|688|9512|5917|80012|3981|1660	http://amigo.geneontology.org/amigo/term/GO:0043233
hsa-miR-497-5p	GO:0071840	BP	cellular component organization or biogenesis	Gene Ontology	83	929	1.72153e-12	1.301e-10	7514|607|3921|51504|8507|6597|4088|23047|7818|6157|3755|9474|3320|11200|10383|92797|56916|3064|10105|3673|11222|23710|60682|196528|26155|83700|4943|1107|10087|11261|2889|203068|9780|1111|150465|6041|9958|400|367|9469|51203|7431|55845|2773|89122|208|8202|54566|55720|5286|22893|8330|22921|5537|3156|7128|57082|114791|23259|55161|4602|10015|9392|59336|51429|84258|998|8897|2339|5189|23277|6651|5872|90…	http://amigo.geneontology.org/amigo/term/GO:0071840
hsa-miR-497-5p	GO:0016772	MF	transferase activity, transferring phosphorus-containing groups	Gene Ontology	40	269	1.93314e-12	1.43774e-10	9263|53354|10000|283106|10290|9618|132|64061|6879|10576|1857|3301|57826|5565|1613|5563|5903|23012|3480|728642|892|894|5166|8395|2932|998|5286|2180|11315|5515|22868|11200|5575|22843|130399|8566|4486|6197|65975|55750	http://amigo.geneontology.org/amigo/term/GO:0016772
hsa-miR-497-5p	GO:0043228	CC	non-membrane-bounded organelle	Gene Ontology	63	606	2.79499e-12	2.04624e-10	79677|4082|23466|203068|4088|83590|8335|661|1613|65983|6603|64061|7170|25836|1896|26512|10857|3312|6645|55052|3516|64393|23012|23112|3014|9683|1495|347240|55388|55845|2773|10521|898|3609|2932|3875|55625|998|5499|55802|8330|9618|6157|26354|114791|11315|51444|5515|10196|22868|10095|9807|4296|4644|9928|5693|80119|1875|54908|23063|55142|8727|1660	http://amigo.geneontology.org/amigo/term/GO:0043228
hsa-miR-497-5p	GO:0032774	BP	RNA biosynthetic process	Gene Ontology	63	612	4.10734e-12	2.87238e-10	2965|4302|54458|10413|200014|65056|7049|1875|23248|6879|6874|5608|8323|27107|9913|80778|57826|55294|7091|1191|4602|11016|60468|5562|26015|55766|84733|8904|2071|25942|64919|83463|58486|57531|51360|64750|342357|79447|57693|7008|204851|7644|9987|3312|3643|10370|2551|22869|3987|84333|7703|6299|3200|5515|5573|25896|134353|51588|7741|54625|3720|84271|8939	http://amigo.geneontology.org/amigo/term/GO:0032774
hsa-miR-497-5p	GO:0009059	BP	macromolecule biosynthetic process	Gene Ontology	78	869	6.6287e-12	4.53412e-10	9204|10678|8031|9126|10270|8178|23469|23512|200014|11315|29940|7818|92399|6385|22849|80712|64061|55617|6879|10691|56919|1896|23189|596|26512|23269|57171|22921|1545|55052|56180|957|285268|1111|8439|84193|7772|9567|367|140612|283459|57798|58487|89978|10971|8772|545|6426|79447|57713|7008|29959|8331|286205|7128|10379|3703|9647|55787|9044|22980|7335|85235|1994|3200|5599|5324|8994|116496|7764|1107|7468…	http://amigo.geneontology.org/amigo/term/GO:0009059
hsa-miR-497-5p	GO:0007165	BP	signal transduction	Gene Ontology	82	940	7.19703e-12	4.78322e-10	5515|152559|3716|10413|1147|157|4214|5565|889|2773|10670|79094|79576|6745|9639|3916|4644|9181|6877|8031|3164|6874|7832|9459|259266|1111|7320|7091|1191|6095|26118|27032|1901|2619|2339|55161|5708|3730|376267|26057|192669|10152|55198|23523|585|5166|29959|51763|208|8202|57085|55824|3708|9628|8453|55207|6934|91|6648|120892|51444|3643|23545|7074|7337|84336|2247|80031|10095|4735|1600|10099|8994|51107|33…	http://amigo.geneontology.org/amigo/term/GO:0007165
hsa-miR-497-5p	GO:0046483	BP	heterocycle metabolic process	Gene Ontology	82	940	7.19703e-12	4.78322e-10	9261|54458|204851|8178|10165|8335|9209|23483|285527|9757|80712|92797|55421|112|5494|23189|25888|3163|1901|27107|196528|11269|7320|2030|54932|3720|11261|6197|10992|26168|957|285268|55762|353274|9958|23112|6648|367|2071|23269|2117|4152|54778|4090|5144|64750|10379|23076|4330|65056|25836|5463|55788|3156|54890|22893|5469|11338|3159|55787|3643|54433|10370|7337|57649|1975|6117|7311|3014|7764|80119|28996…	http://amigo.geneontology.org/amigo/term/GO:0046483
hsa-miR-497-5p	GO:1901362	BP	organic cyclic compound biosynthetic process	Gene Ontology	67	689	8.74085e-12	5.68823e-10	8050|8031|23466|211|4602|112|9209|55206|7049|6877|54458|9908|6879|9181|7975|199692|221937|5563|5608|10971|3454|3720|285268|8804|405|1457|545|728642|23152|2247|9044|4842|10260|205|2551|9987|2932|79753|79447|1595|7008|9826|286205|204851|26512|22849|10114|79576|3643|2071|8357|51701|6426|7730|5832|79960|57763|2976|8994|9219|2020|79191|2005|3735|129607|84313|3980	http://amigo.geneontology.org/amigo/term/GO:1901362
hsa-miR-497-5p	GO:0016020	CC	membrane	Gene Ontology	109	1443	1.07298e-11	6.88692e-10	3920|1967|50488|55500|122786|1783|23365|490|22836|27|51303|51573|161742|8490|403|8904|79701|3480|5144|55625|23478|6157|23012|9980|51375|8879|154091|4486|56122|1386|291|56180|10237|112|3301|84975|196528|830|831|2982|79803|65008|83700|7431|51754|55742|146223|10131|3749|1133|64116|259295|1545|286205|388630|89122|23385|8727|7514|54495|93185|85465|222236|3842|6538|1901|977|976|5538|140730|201158|79183…	http://amigo.geneontology.org/amigo/term/GO:0016020
hsa-miR-497-5p	GO:0042886	BP	amide transport	Gene Ontology	40	288	1.28869e-11	8.00289e-10	550|3920|3921|79659|6814|79576|6890|3308|26286|5494|54469|26297|10971|7327|3454|1191|11260|10628|2665|91056|55238|10526|375056|754|55187|163486|10560|6934|103|3313|23192|150737|8992|130399|11014|9883|51763|55308|84313|155066	http://amigo.geneontology.org/amigo/term/GO:0042886
hsa-miR-497-5p	GO:0044271	BP	cellular nitrogen compound biosynthetic process	Gene Ontology	74	813	1.27534e-11	8.00289e-10	9204|595|23466|10270|51058|55186|84444|92399|5469|55832|5471|8545|51588|6874|26512|10558|23269|56894|9913|580|1191|5515|11261|6597|4141|3516|54851|11222|545|22893|23152|25942|6208|56252|4842|7311|4152|892|205|5165|89978|8439|5144|64750|54778|22869|57713|1964|51504|91|54583|3720|6239|8357|80034|7335|22849|1994|5599|6594|94103|5573|26108|10625|378|10921|8664|54625|351|9880|9921|5917|2066|291	http://amigo.geneontology.org/amigo/term/GO:0044271
hsa-miR-497-5p	GO:0051716	BP	cellular response to stimulus	Gene Ontology	91	1113	1.29809e-11	8.00289e-10	2965|50488|7818|28996|92797|83932|6874|84894|120863|161742|51776|10587|545|64093|85015|51283|4883|219699|5515|22849|7317|22843|5693|4486|2254|595|596|8239|64762|94134|4644|378|5563|1901|146223|2768|8202|8454|3156|27244|57181|5872|80119|7422|54828|8727|9126|333|9639|9874|23710|79659|5708|51347|26130|51135|889|23112|29959|10645|55788|160|163|10818|51232|10625|22881|9459|139285|55207|23228|153222|73…	http://amigo.geneontology.org/amigo/term/GO:0051716
hsa-miR-497-5p	GO:0031325	BP	positive regulation of cellular metabolic process	Gene Ontology	52	461	1.52968e-11	9.30818e-10	53373|154214|607|51804|50488|1147|4087|25897|64762|65056|5316|6385|22849|1875|55832|56916|595|10576|3164|1901|253980|1191|3516|51719|8439|51776|7832|1654|51763|4214|898|23528|3609|2932|4254|54998|2180|9586|5469|388630|3159|57181|7337|1432|865|130399|7203|6603|688|4842|79364|2254	http://amigo.geneontology.org/amigo/term/GO:0031325
hsa-miR-497-5p	GO:1901265	MF	nucleoside phosphate binding	Gene Ontology	47	388	1.6242e-11	9.75665e-10	79677|157|127933|2774|10290|26354|5608|9221|4691|11269|1968|7203|51347|1111|6041|403|23112|80025|57147|10179|155435|9529|10521|6584|60558|5144|51715|55720|5286|3070|3800|3156|9927|91|9748|22907|4139|10845|9807|7317|6197|7465|2665|55585|51184|80010|4850	http://amigo.geneontology.org/amigo/term/GO:1901265
hsa-miR-497-5p	GO:0016070	BP	RNA metabolic process	Gene Ontology	69	738	2.14331e-11	1.26321e-09	8220|51013|22849|23466|56180|7311|23512|200014|26108|11200|153222|6899|7832|25888|5608|7514|10971|140890|1111|5708|3454|4087|5563|8804|405|6041|84193|9958|10621|140612|55596|4842|10318|892|4335|23524|580|208|8634|862|57713|79447|84271|6732|6670|22827|127253|3312|5515|3987|22980|22869|114803|85235|27250|5599|11062|127933|5463|7764|378|54433|25836|63899|2005|79364|254251|84705|50937	http://amigo.geneontology.org/amigo/term/GO:0016070
hsa-miR-497-5p	GO:0036094	MF	small molecule binding	Gene Ontology	52	467	2.35477e-11	1.37059e-09	140901|50488|3308|4363|6597|1783|55341|984|81562|9908|56916|3735|376267|22836|1859|140890|51199|9258|7203|283459|53354|4720|9927|84056|5861|79701|10670|89978|6584|55605|8395|55720|150465|10461|23195|10114|1738|22907|4152|1432|10845|8879|5575|4296|5243|1107|10921|28996|131870|84271|415116|9778	http://amigo.geneontology.org/amigo/term/GO:0036094
hsa-miR-497-5p	GO:0006807	BP	nitrogen compound metabolic process	Gene Ontology	113	1541	2.40306e-11	1.38154e-09	2965|54726|154214|2650|55509|3320|132|83932|221937|6874|285362|11269|55294|85460|4602|54851|5903|7693|25942|85015|79703|192669|8634|55625|11275|7126|54433|6095|55905|7311|9908|131870|51763|291|56180|84444|5601|112|5494|3301|9913|9700|2982|5316|285268|8804|23175|2071|7730|4214|2768|9529|84515|79699|388630|27250|5575|4677|51588|23382|54625|4953|55750|140901|9126|283459|25782|6535|10558|347344|2889|…	http://amigo.geneontology.org/amigo/term/GO:0006807
hsa-miR-497-5p	GO:0050896	BP	response to stimulus	Gene Ontology	102	1343	3.83584e-11	2.15244e-09	5515|23511|3320|28996|92797|6879|6874|490|56896|6648|57826|8471|8493|64093|219699|51444|3643|51441|23370|4735|4739|7311|192670|9261|6597|2776|6385|54890|6383|6780|79960|10979|55421|2072|58487|8450|80851|219771|284996|388630|2040|5573|116138|9967|415116|10413|84894|11215|57406|60|6535|6538|3454|3516|10628|8611|51135|10625|253461|10318|54778|3600|8772|54566|55273|1432|4602|84109|6400|1026|10095|581…	http://amigo.geneontology.org/amigo/term/GO:0050896
hsa-miR-497-5p	GO:0034645	BP	cellular macromolecule biosynthetic process	Gene Ontology	71	789	5.33637e-11	2.959e-09	10678|8031|1147|8507|6597|10166|23512|55186|29940|9757|22849|1875|3014|9181|7975|56919|7049|79365|51360|80778|6648|8092|7091|5515|9830|4087|51804|342371|1107|8848|6184|84193|7772|7693|284439|9209|253461|892|3480|5283|23175|9441|123283|9219|9586|4330|8335|85235|3643|4791|55388|51701|359948|7703|6299|27250|7586|5573|25896|8994|116496|23064|378|22921|54625|23063|254251|2254|9817|55005|25836	http://amigo.geneontology.org/amigo/term/GO:0034645
hsa-miR-497-5p	GO:0016192	BP	vesicle-mediated transport	Gene Ontology	33	212	5.62772e-11	3.08406e-09	130340|54495|157|3920|333|6385|5648|4644|60684|23243|5099|4943|140730|1778|5562|80331|26258|400|51209|29959|9527|10139|5286|51164|5538|7840|10015|51375|10095|25977|79036|351|84313	http://amigo.geneontology.org/amigo/term/GO:0016192
hsa-miR-497-5p	GO:0006357	BP	regulation of transcription by RNA polymerase II	Gene Ontology	40	306	6.75219e-11	3.6575e-09	9204|595|200014|84458|1875|26354|6879|5494|9612|23633|1901|7091|26574|11016|6197|10628|6041|84733|23152|64919|892|4090|23528|64750|3400|79365|3159|4603|10370|2254|84333|6299|7311|378|7468|2020|54828|254251|1386|57154	http://amigo.geneontology.org/amigo/term/GO:0006357
hsa-miR-497-5p	GO:0006793	BP	phosphorus metabolic process	Gene Ontology	52	488	1.00422e-10	5.31667e-09	140901|56916|10327|63967|112|64762|9618|8445|498|6879|9181|1857|2820|5608|138639|5255|7074|5565|51719|5563|405|545|2260|10165|80025|4214|23523|22868|205|580|29959|8395|3609|2932|22908|8454|204851|226|10114|2071|51701|255967|143384|51166|81611|728642|7311|7374|7422|55589|22881|415116	http://amigo.geneontology.org/amigo/term/GO:0006793
hsa-miR-497-5p	GO:0043232	CC	intracellular non-membrane-bounded organelle	Gene Ontology	57	569	1.12532e-10	5.89126e-09	10152|51013|127933|1780|3064|661|1613|114034|8349|6603|6929|9181|6877|1896|6623|9221|5357|8867|51170|7203|5515|9817|3516|205564|55706|7514|55766|9867|8357|192669|347240|3609|23076|998|3716|5531|9219|8453|5048|7126|6717|3313|5775|10015|10845|51256|1875|6299|4735|84101|4739|6334|80119|7468|63899|64061|3981	http://amigo.geneontology.org/amigo/term/GO:0043232
hsa-miR-497-5p	GO:0031326	BP	regulation of cellular biosynthetic process	Gene Ontology	62	652	1.2036e-10	6.17872e-09	5515|9204|10413|596|7311|55509|728642|64207|1111|5562|153222|8031|221937|6874|5608|55206|10971|5728|1831|7320|8092|79960|1964|26574|9830|1613|342371|8848|7514|9567|81620|23269|6208|92715|1545|892|4302|5166|3480|11016|9441|9219|7586|8335|6717|9647|268|4602|7812|199692|94103|51058|8994|8939|378|208|6239|5813|5814|11261|2066|5499	http://amigo.geneontology.org/amigo/term/GO:0031326
hsa-miR-497-5p	GO:0032502	BP	developmental process	Gene Ontology	78	932	1.44197e-10	7.26491e-09	23670|607|9817|113251|8178|83700|5048|79576|10116|64207|80712|3400|9181|283659|23259|8323|79365|4691|7764|51715|2889|2030|1191|26574|5376|23175|5562|150465|6041|26258|5781|55008|403|55742|5861|2117|28996|259266|23332|51493|1738|51763|4335|8202|4254|1967|359845|3708|8454|3267|9469|6738|136319|3159|55787|5515|2260|163|7431|59336|1432|51232|4735|1600|3987|4134|5463|4644|23064|7074|7468|26108|27173|2…	http://amigo.geneontology.org/amigo/term/GO:0032502
hsa-miR-497-5p	GO:0048523	BP	negative regulation of cellular process	Gene Ontology	66	723	1.47815e-10	7.36793e-09	3065|9126|4087|5048|79094|22849|3659|6879|7832|23087|1111|5728|831|8945|580|79960|25960|1191|60468|5563|10628|55179|81029|55929|6239|9683|163|4842|91|3667|3600|10131|375056|208|4883|23076|710|441478|3708|1545|7128|57082|7126|136319|10114|3312|4602|8357|22980|51701|56893|27113|51256|142679|3159|25896|8994|116496|378|51094|2005|5813|2254|3980|3981|23189	http://amigo.geneontology.org/amigo/term/GO:0048523
hsa-miR-497-5p	GO:0008219	BP	cell death	Gene Ontology	41	330	1.58633e-10	7.74242e-09	55201|9474|3064|79094|9181|10105|6609|23087|8406|3301|4691|10971|831|7320|51283|6477|2619|51776|83464|10818|64919|5166|3480|9113|10285|2932|51703|3156|7128|6648|10370|80034|333|27113|7703|4297|7374|10921|9577|415116|9927	http://amigo.geneontology.org/amigo/term/GO:0008219
hsa-miR-497-5p	GO:0030554	MF	adenyl nucleotide binding	Gene Ontology	36	262	1.75504e-10	8.43411e-09	53354|3716|55500|283459|5573|10730|5604|5563|9221|3301|11269|3798|9529|1778|167153|23170|23012|23047|2071|57147|10131|89978|8634|55324|5129|91|51701|51703|11200|1182|130399|6334|4486|6197|65975|5917	http://amigo.geneontology.org/amigo/term/GO:0030554
hsa-miR-497-5p	GO:1901564	BP	organonitrogen compound metabolic process	Gene Ontology	83	1027	1.77977e-10	8.46613e-09	127933|64762|3921|1654|1147|55243|4087|25897|8239|10461|55186|2776|8445|11320|29968|5562|6383|103|51347|10678|5608|23225|23012|9913|55291|7320|57826|728642|1191|26574|55052|6477|160760|1857|2619|6041|9958|84340|64718|54813|23035|3730|55526|80025|9063|4090|894|5708|51719|3480|375743|9444|8202|710|6732|10560|3156|51504|6157|226|4953|7074|57589|56941|51703|80174|51166|1642|128308|10423|865|5631|9801…	http://amigo.geneontology.org/amigo/term/GO:1901564
hsa-miR-497-5p	GO:0045184	BP	establishment of protein localization	Gene Ontology	38	295	2.92829e-10	1.35846e-08	7514|79659|127933|65055|6745|5601|9181|399979|6623|23225|11269|3312|4943|26958|85465|376267|10762|8905|9409|6208|26286|54890|89978|113402|2850|4218|11276|6934|6157|11338|11315|5538|91056|22820|3320|51763|64145|415116	http://amigo.geneontology.org/amigo/term/GO:0045184
hsa-miR-497-5p	GO:0006810	BP	transport	Gene Ontology	63	691	4.05402e-10	1.86226e-08	53373|9261|3921|595|23255|10270|4170|4891|54495|1778|60|5604|3916|3308|3799|11315|23633|55291|1968|92014|1191|10890|6558|10762|8614|6041|26130|10166|5861|10165|10526|23332|585|375056|6584|54207|3742|6400|9377|550|6520|754|7074|2850|5469|226|120892|23545|9392|6426|51375|6542|25782|5599|6208|84804|5243|378|10921|51517|55308|9697|372	http://amigo.geneontology.org/amigo/term/GO:0006810
hsa-miR-497-5p	GO:0009968	BP	negative regulation of signal transduction	Gene Ontology	30	193	4.27366e-10	1.9441e-08	595|143686|23228|5494|6609|51347|1859|7320|1191|161742|1857|1759|8904|81848|10625|10318|5922|51283|8772|9113|219699|9628|286205|7128|388630|160|4170|142679|27250|57154	http://amigo.geneontology.org/amigo/term/GO:0009968
hsa-miR-497-5p	GO:0048583	BP	regulation of response to stimulus	Gene Ontology	57	593	4.67076e-10	2.08427e-08	10413|139285|55527|64762|3667|3320|9639|23228|153222|5494|50488|5608|8406|1901|253980|6648|51283|2342|51191|5563|351|51135|2850|9681|81848|25942|1654|27250|23332|54890|1173|1690|10521|54469|2932|25960|8202|4254|710|441478|5531|55788|103|10114|23279|8357|51701|6899|132|5599|1600|6655|4296|9928|55654|3673|415116	http://amigo.geneontology.org/amigo/term/GO:0048583
hsa-miR-497-5p	GO:0048856	BP	anatomical structure development	Gene Ontology	73	868	4.64132e-10	2.08427e-08	595|4088|23469|54477|3064|6814|2776|81848|3320|23228|6929|3145|6717|6899|9612|3164|7049|8131|9529|2650|1738|5819|160|10890|122786|1613|10628|8614|6197|9927|56259|23175|55740|6594|56138|10818|889|6303|55845|2768|1690|2071|898|351|5144|5818|3673|6732|150465|57082|91|103|79576|3643|10247|163|22980|6426|5813|10461|27032|5573|3662|8772|51107|83700|2674|79191|55589|359845|55585|3981|57622	http://amigo.geneontology.org/amigo/term/GO:0048856
hsa-miR-497-5p	GO:0010467	BP	gene expression	Gene Ontology	71	834	4.98205e-10	2.20221e-08	10318|9261|10413|1147|23466|127933|23511|9209|84444|132|6603|6929|92797|56916|9181|5494|8031|3735|253461|57713|92345|3454|7049|55052|1967|4141|55762|92014|6197|284439|56259|23469|367|83463|54625|10260|892|23524|89978|29959|351|23478|8330|65056|4799|6934|22827|11338|5515|6239|4152|255967|84271|85235|55294|127253|1975|23112|23064|5693|2020|9967|63899|7422|79191|9880|254251|84313|57154|7586|2066	http://amigo.geneontology.org/amigo/term/GO:0010467
hsa-miR-497-5p	GO:0034654	BP	nucleobase-containing compound biosynthetic process	Gene Ontology	64	714	5.5202e-10	2.3949e-08	10413|1147|6597|8178|23512|285527|498|92797|112|56919|1896|6874|3164|79365|4691|1738|1831|6648|55294|26574|9612|4087|1111|90321|23175|22893|100529215|10625|1654|27107|4090|56894|545|8331|6934|367|22849|3159|268|2976|84313|9392|59336|359948|7703|57649|5814|7586|6117|7311|1741|1107|2254|1026|6239|7422|2982|285704|64061|7182|114803|3980|3981|29068	http://amigo.geneontology.org/amigo/term/GO:0034654
hsa-miR-497-5p	GO:0031981	CC	nuclear lumen	Gene Ontology	57	603	8.23877e-10	3.54154e-08	9204|607|3921|9612|4087|63967|60528|10730|64326|8349|1875|10000|23633|4691|57713|84135|10979|9817|1613|24149|1111|140901|51203|51493|57798|58486|10285|23524|5708|211|64750|8202|23076|79447|84271|114799|79768|85235|57082|4170|10114|8021|51701|1026|29123|90441|25998|27250|5814|4297|116138|5693|25836|2005|54906|3980|80010	http://amigo.geneontology.org/amigo/term/GO:0031981
hsa-miR-497-5p	GO:0008104	BP	protein localization	Gene Ontology	42	367	9.17833e-10	3.87433e-08	3921|10270|6814|550|545|5189|26297|4691|10971|7327|11260|1857|55705|7514|403|523|90196|9409|1654|5862|55374|585|26958|400|3800|754|23255|10564|11338|11315|91056|22820|51429|5830|79774|161176|4644|130399|7468|415116|56947|9927	http://amigo.geneontology.org/amigo/term/GO:0008104
hsa-miR-497-5p	GO:0032991	CC	protein-containing complex	Gene Ontology	59	639	9.4329e-10	3.94624e-08	1147|283459|23512|2773|91689|550|9474|60|8445|1875|3014|6879|26515|518|22913|7433|253980|140890|27244|8092|55294|2342|7203|7049|3796|60468|898|10762|523|4967|10621|2117|10152|1138|1173|3588|143686|9567|3742|9441|22908|8905|3720|219771|55388|255967|1026|85235|22863|3980|4297|5255|8994|8992|1457|9577|84313|372|55142	http://amigo.geneontology.org/amigo/term/GO:0032991
hsa-miR-497-5p	GO:0010556	BP	regulation of macromolecule biosynthetic process	Gene Ontology	58	623	9.87462e-10	4.09447e-08	9204|1967|595|9126|596|9209|84458|984|80712|3658|136319|7975|221937|9321|3164|57711|9913|1831|1968|1191|26574|6597|60468|7772|23112|8904|140612|64710|28996|892|64750|10521|23528|10645|342357|7832|55273|114799|9584|6648|160|23152|80034|2551|9392|57649|5573|9908|7764|1964|51588|1457|2020|1386|79364|84313|84271|5814	http://amigo.geneontology.org/amigo/term/GO:0010556
hsa-miR-497-5p	GO:0016567	BP	protein ubiquitination	Gene Ontology	23	118	1.04102e-09	4.27868e-08	8507|9618|64326|5601|120892|79845|7327|7267|6477|51433|5193|54813|9529|64750|11275|8450|11315|51444|55905|51256|1642|9921|11261	http://amigo.geneontology.org/amigo/term/GO:0016567
hsa-miR-497-5p	GO:0023051	BP	regulation of signaling	Gene Ontology	50	495	1.20536e-09	4.8898e-08	9459|4087|4088|5048|57568|57569|8445|23228|153222|6877|1896|490|8323|26155|7320|2342|1191|5565|957|1111|1759|208|81848|2247|4335|8772|3480|64750|2932|79447|204851|11215|5469|3643|57181|10818|27113|388630|9639|5599|27032|130399|51588|1457|2066|55654|57154|57153|80010|50937	http://amigo.geneontology.org/amigo/term/GO:0023051
hsa-miR-497-5p	GO:0008144	MF	drug binding	Gene Ontology	37	300	1.46814e-09	5.87947e-08	9263|79677|9261|6594|283459|23047|10521|984|9149|9874|9221|3798|2342|3643|27032|1111|523|1138|5166|29959|8634|5129|204851|91|10114|3312|9748|4139|51703|10845|80179|3980|7317|8879|55589|65975|415116	http://amigo.geneontology.org/amigo/term/GO:0008144
hsa-miR-497-5p	GO:0017076	MF	purine nucleotide binding	Gene Ontology	38	315	1.54433e-09	6.10631e-08	6594|6597|10290|3320|728642|2768|26354|3308|9874|3735|3301|27|3798|4677|6197|4141|23012|403|60558|4214|10645|9529|9258|8395|9113|285282|10845|80179|908|1182|5631|4644|6334|9807|9967|3980|3981|7465	http://amigo.geneontology.org/amigo/term/GO:0017076
hsa-miR-497-5p	GO:0019899	MF	enzyme binding	Gene Ontology	39	330	1.59951e-09	6.27154e-08	9459|8178|23523|112|351|23710|11138|55291|7320|5903|1191|160|8493|55705|5781|56259|54165|996|894|55654|208|5144|2932|6934|6717|51444|23370|23545|55905|51701|7335|143384|25998|2339|79774|378|51588|255488|3987	http://amigo.geneontology.org/amigo/term/GO:0019899
hsa-miR-497-5p	GO:0006139	BP	nucleobase-containing compound metabolic process	Gene Ontology	75	933	1.6926e-09	6.58148e-08	2965|79677|9261|3921|6594|7128|9126|10270|4088|8335|23483|7586|9063|9181|5494|51347|56894|342357|1545|5708|29101|142940|9817|4141|688|54851|1857|26015|2745|51763|2030|84733|8904|100529215|2247|9044|79703|80025|192669|283459|84458|4335|10521|29959|898|9444|55802|2180|6670|204851|22893|103|8021|4602|8357|80034|55596|6426|59336|84333|3200|115752|908|127933|6651|518|7741|63899|7422|54828|4842|79364|1…	http://amigo.geneontology.org/amigo/term/GO:0006139
hsa-miR-497-5p	GO:0046907	BP	intracellular transport	Gene Ontology	33	247	1.87834e-09	7.24359e-08	10890|1780|65055|79576|6745|6890|498|54469|9874|23633|7327|4943|11260|5193|7514|29916|91056|400|26958|10139|11276|23255|5048|26286|9897|9980|163|57222|255967|51164|5189|5872|54828	http://amigo.geneontology.org/amigo/term/GO:0046907
hsa-miR-497-5p	GO:0010468	BP	regulation of gene expression	Gene Ontology	60	671	2.07478e-09	7.87156e-08	2965|3921|6594|4087|23512|79094|55509|9757|5604|54458|55832|8994|1871|3673|23189|6874|23225|57711|10628|9913|3312|8945|347344|7049|3516|140612|5563|55762|6041|9958|84733|100529215|2247|64919|22980|7431|10526|10131|898|1111|2932|998|5463|9586|10762|11315|55787|4602|10247|10196|1994|5599|5324|51351|131870|7422|285704|9908|55005|50937	http://amigo.geneontology.org/amigo/term/GO:0010468
hsa-miR-497-5p	GO:0090304	BP	nucleic acid metabolic process	Gene Ontology	68	811	2.05875e-09	7.87156e-08	7832|4302|3921|9612|9126|6597|984|27042|114034|5562|9987|153222|5494|6594|221937|25888|11315|9221|10971|55290|51444|84135|79960|5693|26574|862|5316|342371|24149|54913|10318|10521|55929|26155|55720|57693|441478|112487|8021|1545|254251|22827|5708|3159|23438|10370|7586|2551|6899|1026|1432|1994|8545|57763|90381|51013|127933|6651|8939|378|8761|351|29101|9921|84271|3981|23189|3659	http://amigo.geneontology.org/amigo/term/GO:0090304
hsa-miR-497-5p	GO:0009893	BP	positive regulation of metabolic process	Gene Ontology	47	457	2.2353e-09	8.31232e-08	596|4891|65056|6603|5601|3659|3065|7975|3673|6874|6597|10558|253461|51360|8092|79960|55905|51343|7431|1399|25942|283106|5781|894|10521|8439|3480|2932|5324|7126|103|3312|219771|51441|57826|7335|10818|388630|90441|5573|9928|131870|9921|7182|57154|55005|26354	http://amigo.geneontology.org/amigo/term/GO:0009893
hsa-miR-497-5p	GO:0018130	BP	heterocycle biosynthetic process	Gene Ontology	62	707	2.23025e-09	8.31232e-08	8031|56180|8178|4891|55509|11200|1875|6929|92797|7975|2982|221937|9612|109504726|8323|1901|8848|57826|79960|7203|26574|11261|211|5316|5562|8804|7772|8904|81620|8239|2117|3145|57798|5166|898|11016|8202|3735|57693|10621|5469|9987|285527|23152|4152|1026|3200|6117|5573|26108|9908|7764|51588|80712|2020|2005|79364|254251|7182|5813|3981|3659	http://amigo.geneontology.org/amigo/term/GO:0018130
hsa-miR-497-5p	GO:0005654	CC	nucleoplasm	Gene Ontology	48	474	2.39033e-09	8.78423e-08	9261|6934|23524|7818|79576|3320|7975|8349|54890|55832|56916|1871|83699|3600|3164|23633|9772|1859|3065|55294|1457|9044|85015|1654|9063|4090|894|10131|54998|64207|55291|8453|204851|9987|11315|11080|6095|8357|51701|7703|8897|25896|23064|9967|2066|50813|6050|80010	http://amigo.geneontology.org/amigo/term/GO:0005654
hsa-miR-497-5p	GO:0043167	MF	ion binding	Gene Ontology	76	962	2.65852e-09	9.65619e-08	10322|1147|9126|4087|23469|54477|10670|2774|55207|132|28996|3145|83932|5471|3673|3164|51347|3313|3301|57711|1859|11269|7320|11016|51559|58477|285268|7644|2665|403|523|728642|2071|10669|1654|54583|3628|9063|199692|5165|54469|23528|9113|10645|998|57693|5531|9219|3156|5048|51199|9647|3312|619279|5917|9044|284996|51701|6334|51429|10845|11200|8895|7317|51058|7764|80119|23001|131870|1386|255488|65975|7…	http://amigo.geneontology.org/amigo/term/GO:0043167
hsa-miR-497-5p	GO:0009057	BP	macromolecule catabolic process	Gene Ontology	29	198	2.79794e-09	1.00844e-07	127933|283106|550|64326|22849|219333|253980|56893|7267|9810|1457|9683|2247|6208|83590|996|9529|55802|51429|7337|57589|6400|1432|167227|1642|7317|9967|192670|84313	http://amigo.geneontology.org/amigo/term/GO:0009057
hsa-miR-497-5p	GO:0007154	BP	cell communication	Gene Ontology	78	1003	3.12751e-09	1.11772e-07	152559|3716|595|83700|8239|10564|29967|57406|60|50937|94134|3320|6877|490|6623|10695|977|5862|10788|8945|580|3643|10087|5376|3516|5563|1111|64393|9783|8611|5781|5922|7433|163486|221393|192669|10318|10526|3667|4335|10521|8772|9209|9113|285282|53349|55824|51444|8454|8453|10461|6738|388630|5286|8471|23545|23370|7431|79753|27113|4170|9392|51232|27250|22863|81619|26057|8879|4486|56603|51094|5048|5565|…	http://amigo.geneontology.org/amigo/term/GO:0007154
hsa-miR-497-5p	GO:0097659	BP	nucleic acid-templated transcription	Gene Ontology	56	612	3.37504e-09	1.18901e-07	5515|607|51804|8031|4088|23469|54778|285527|6603|153222|6877|56919|3164|5608|4691|342357|1545|57826|7091|6095|3662|55762|55766|6239|64919|2117|892|10521|29959|57531|8202|441478|7008|5324|9586|4799|7644|9647|3720|4791|7812|5813|1432|7703|6299|27250|862|7311|25896|3014|2020|79191|9880|254251|84313|57154	http://amigo.geneontology.org/amigo/term/GO:0097659
hsa-miR-497-5p	GO:0009058	BP	biosynthetic process	Gene Ontology	75	952	3.78256e-09	1.32146e-07	4302|3921|6597|5573|178|9209|58486|5316|1875|5601|3145|83932|5471|5494|109504726|1386|60468|1738|9921|7203|9830|3516|342371|11222|55762|405|25836|9958|7693|2260|55625|5144|2117|54583|892|4090|5165|10521|2071|23259|8395|8335|5631|79993|998|9441|8330|80778|51507|6157|6738|10114|23438|1650|9045|22980|2531|84333|7703|51166|27250|92370|908|862|865|5226|3014|518|28996|5781|79191|129607|54998|92715|8895	http://amigo.geneontology.org/amigo/term/GO:0009058
hsa-miR-497-5p	GO:1901360	BP	organic cyclic compound metabolic process	Gene Ontology	76	971	3.86061e-09	1.33497e-07	2965|3921|56180|4088|4141|84444|55206|10691|51804|342371|83932|1871|6877|6874|3163|1901|57711|253461|51444|7320|54932|1107|4677|11261|10992|51588|54851|353274|84135|3987|23175|367|2260|23269|51347|54625|3145|57798|9392|10521|56894|898|8634|8202|81620|23483|84271|22893|2180|9586|286205|2072|22827|10423|5538|4791|9044|7337|59336|1994|64710|1613|1975|865|5631|80347|5693|10921|6197|192670|351|55308|5…	http://amigo.geneontology.org/amigo/term/GO:1901360
hsa-miR-497-5p	GO:0005524	MF	ATP binding	Gene Ontology	32	242	4.11718e-09	1.41326e-07	157|283459|984|8445|9149|10576|490|22836|3798|4677|3643|51347|6041|523|51493|5166|55605|3480|8634|123283|150465|55324|23438|9748|9044|51701|9807|908|79739|55308|3980|1660	http://amigo.geneontology.org/amigo/term/GO:0005524
hsa-miR-497-5p	GO:0009966	BP	regulation of signal transduction	Gene Ontology	44	424	5.64108e-09	1.90839e-07	152559|9459|596|4088|124583|94134|3659|23365|5527|10105|80829|8131|79659|10971|6648|2066|64061|51347|8490|5781|545|2260|10818|64710|754|51763|208|8202|55273|9219|2932|6717|10114|7049|9867|55161|2339|10098|51776|7422|5601|2254|80010|9927	http://amigo.geneontology.org/amigo/term/GO:0009966
hsa-miR-497-5p	GO:0022402	BP	cell cycle process	Gene Ontology	28	193	6.28655e-09	2.10397e-07	5515|9181|9639|5471|7832|5608|5728|5565|51719|5563|23175|26057|1654|585|898|208|9113|6934|5048|9700|114791|3643|147841|51429|9928|25836|131870|351	http://amigo.geneontology.org/amigo/term/GO:0022402
hsa-miR-497-5p	GO:0010605	BP	negative regulation of macromolecule metabolic process	Gene Ontology	44	427	6.83764e-09	2.25618e-07	9612|4088|23512|9474|3658|8545|221937|11315|57713|11016|688|342371|167153|545|22893|22980|2117|10318|4152|23528|9444|26155|7832|998|3400|9219|4799|7644|120892|8021|23279|10370|10196|255967|7703|22863|5573|3014|5693|25836|7422|2005|6050|3156	http://amigo.geneontology.org/amigo/term/GO:0010605
hsa-miR-497-5p	GO:0043933	BP	protein-containing complex subunit organization	Gene Ontology	33	263	7.61139e-09	2.48524e-07	607|51504|4087|6814|7818|8349|51719|6879|196528|1968|56893|7049|4720|5562|1759|5861|84340|3749|54998|5537|6934|6631|3312|3643|10247|23545|22907|51429|81611|1975|23064|8664|192670	http://amigo.geneontology.org/amigo/term/GO:0043933
hsa-miR-497-5p	GO:0140110	MF	transcription regulator activity	Gene Ontology	34	278	8.10196e-09	2.62711e-07	10413|26155|7693|55509|9757|6603|6877|8323|9913|1831|57826|56970|51360|26574|5316|8804|23175|4335|342357|9441|5324|6934|10379|268|80034|2551|7703|7586|862|51351|5728|7764|7422|2005	http://amigo.geneontology.org/amigo/term/GO:0140110
hsa-miR-497-5p	GO:0006366	BP	transcription by RNA polymerase II	Gene Ontology	38	338	8.83973e-09	2.84663e-07	1871|6929|153222|8545|54583|55294|7091|26574|8804|7514|84733|23152|253461|4090|3662|55929|64750|55273|9586|91|11315|7049|2071|10370|22980|2551|57154|1432|6299|4297|25836|26015|54828|29101|8453|1386|114803|51586	http://amigo.geneontology.org/amigo/term/GO:0006366
hsa-miR-497-5p	GO:0051234	BP	establishment of localization	Gene Ontology	64	773	9.56218e-09	3.03753e-07	114134|4082|84522|23255|23607|5048|550|9474|60|168507|153129|5601|3308|9181|6535|6041|399979|3159|6538|5357|10971|51715|3799|55294|22878|11261|11260|3516|5903|9783|403|26130|51134|9045|8904|64747|10526|1138|60684|113402|208|9444|2850|6520|11276|6934|6157|5469|8697|57181|23545|3320|255967|81614|4170|2040|25998|84826|27032|4134|3708|5819|3842|1386	http://amigo.geneontology.org/amigo/term/GO:0051234
hsa-miR-497-5p	GO:0031982	CC	vesicle	Gene Ontology	58	667	9.6685e-09	3.05062e-07	130340|403|217|4891|5048|6814|2776|36|153129|9181|10576|201627|1362|5862|830|4677|7049|11261|4141|6623|51599|80331|9897|8611|26130|523|8904|79701|51573|2936|208|9527|6426|5286|6520|8330|9586|9474|7128|8450|7126|9748|9045|23193|7335|29916|1432|55161|10095|1642|4735|3708|116496|378|23385|7422|25977|155066	http://amigo.geneontology.org/amigo/term/GO:0031982
hsa-miR-497-5p	GO:0012505	CC	endomembrane system	Gene Ontology	56	633	1.00297e-08	3.13295e-07	130340|3920|79774|84522|64225|53354|1780|79982|10564|23042|29940|55207|5604|6383|23080|9321|90809|10857|56894|51360|8614|6510|6645|10890|957|55705|9897|81029|57147|894|375056|57531|8395|55625|11276|65055|3267|57082|7126|23259|55161|9392|22863|4739|7311|11161|5872|92370|8813|351|201158|55308|10618|9817|9926|3156	http://amigo.geneontology.org/amigo/term/GO:0012505
hsa-miR-497-5p	GO:0006996	BP	organelle organization	Gene Ontology	51	548	1.0139e-08	3.14612e-07	55243|400|8450|84444|92399|7126|3065|10105|545|399979|23259|23243|9928|9913|55294|22878|55052|5562|5903|10959|55572|3998|2071|5862|9527|2932|286527|54998|3070|9826|57082|6738|8697|23370|9897|23192|9392|51776|85235|7703|10095|11200|23064|5819|80119|9883|54908|55654|7182|5813|7465	http://amigo.geneontology.org/amigo/term/GO:0006996
hsa-miR-497-5p	GO:0051252	BP	regulation of RNA metabolic process	Gene Ontology	53	582	1.02537e-08	3.16078e-07	127933|10413|10270|4088|8239|5604|6603|55832|3659|7975|1896|23189|23269|8848|55290|3312|55294|1107|11200|3516|342371|24149|10628|9958|9567|84733|10621|25942|23512|1654|58486|8202|22869|55273|9826|9586|286205|204851|10379|22827|268|51441|7335|359948|79960|57763|5814|378|51588|1386|51586|2066|50937	http://amigo.geneontology.org/amigo/term/GO:0051252
hsa-miR-497-5p	GO:1903506	BP	regulation of nucleic acid-templated transcription	Gene Ontology	51	549	1.07083e-08	3.27933e-07	595|204851|10270|8178|55617|9209|65056|64207|6603|55832|5494|9612|109504726|27107|196528|342357|353274|3720|60468|342371|55762|84193|23175|100529215|7730|84458|10521|3662|8772|23528|51360|3400|9826|8453|286205|9584|91|9987|268|6095|1386|10370|9044|22980|5573|9967|2020|688|9880|84313|2066	http://amigo.geneontology.org/amigo/term/GO:1903506
hsa-miR-497-5p	GO:0019219	BP	regulation of nucleobase-containing compound metabolic process	Gene Ontology	54	608	1.62465e-08	4.87967e-07	9204|10270|90321|200014|9209|65056|984|11200|64207|6603|6929|10576|11315|54583|79365|57711|80778|8945|55294|1191|9810|8178|405|9149|9567|2247|56252|28996|22980|5165|55929|5324|8335|9647|8021|5515|4152|51701|79753|56970|57649|862|5573|23064|1107|9967|26108|10379|3164|55832|1386|51586|2066|50937	http://amigo.geneontology.org/amigo/term/GO:0019219
hsa-miR-497-5p	GO:0016071	BP	mRNA metabolic process	Gene Ontology	21	118	2.21964e-08	6.42792e-07	55421|255967|8021|142940|9444|55225|7832|167153|9410|728642|11052|9967|92797|6157|6631|23450|10114|4850|22913|6050|192669	http://amigo.geneontology.org/amigo/term/GO:0016071
hsa-miR-497-5p	GO:0097367	MF	carbohydrate derivative binding	Gene Ontology	38	351	2.20728e-08	6.42792e-07	127933|50488|64768|6597|2774|60|498|9778|56919|51347|3301|27|4141|5563|523|9113|80025|5862|6594|2768|8435|9258|29959|5144|400|2932|5286|3070|2180|5048|4735|51184|130399|1107|10383|415116|908|9927	http://amigo.geneontology.org/amigo/term/GO:0097367
hsa-miR-497-5p	GO:0009889	BP	regulation of biosynthetic process	Gene Ontology	57	670	2.60621e-08	7.43101e-07	8050|10413|54778|5604|80712|5601|3659|9181|545|3164|5608|8323|6648|55294|1964|359948|11261|285268|8848|25836|23112|9567|2247|83463|84458|3600|89978|2551|898|4335|4330|114799|8330|9826|8453|4799|7644|91|84333|11315|160|4791|10370|22980|51701|79753|25942|1432|7703|25782|51058|9149|351|26574|84271|8939|5499	http://amigo.geneontology.org/amigo/term/GO:0009889
hsa-miR-497-5p	GO:0009056	BP	catabolic process	Gene Ontology	42	417	2.69935e-08	7.57354e-07	4329|217|3920|10327|3667|9474|25782|23607|153222|3163|79845|8021|8945|64768|55294|5255|5565|7267|5562|51752|523|4967|4842|192669|3916|11180|2768|580|23259|64750|23130|1545|8450|120892|51444|51441|1432|36|5693|10921|23001|6050	http://amigo.geneontology.org/amigo/term/GO:0009056
hsa-miR-497-5p	GO:0006928	BP	movement of cell or subcellular component	Gene Ontology	31	250	2.73895e-08	7.6389e-07	10152|10678|60|51804|6899|154810|1901|977|830|7320|57826|6477|51135|54919|5861|347240|55845|351|64750|6520|3799|10370|22820|4139|6385|4134|653464|5872|378|6239|54437	http://amigo.geneontology.org/amigo/term/GO:0006928
hsa-miR-497-5p	GO:0035639	MF	purine ribonucleoside triphosphate binding	Gene Ontology	35	309	2.84666e-08	7.86905e-07	127933|3716|10000|157|55341|2776|728642|26354|64225|56919|51199|4677|1613|5562|5563|23012|10606|400|403|4214|8634|4218|3800|984|10461|3312|3643|9044|1432|5631|5243|130399|6334|9967|9881	http://amigo.geneontology.org/amigo/term/GO:0035639
hsa-miR-497-5p	GO:0022607	BP	cellular component assembly	Gene Ontology	38	360	4.04575e-08	1.10533e-06	607|2889|7311|57082|6814|9474|55832|3308|23710|6648|55052|5376|51256|51719|138639|55572|1759|5861|585|8772|9113|5286|22921|1495|8450|7126|1968|120892|255967|388630|6208|4134|5872|203547|83640|6903|83660|56947	http://amigo.geneontology.org/amigo/term/GO:0022607
hsa-miR-497-5p	GO:0051171	BP	regulation of nitrogen compound metabolic process	Gene Ontology	69	900	4.2527e-08	1.14274e-06	2965|607|54458|595|23466|7311|200014|6385|5604|28996|8994|6879|6609|5494|8031|1896|7832|342357|1968|56893|7074|7049|9817|10921|54851|1857|131870|6041|9567|10621|2260|22843|192669|9063|58487|10131|8439|4335|8202|4330|2180|6670|9584|5048|2020|6648|11315|4602|100529215|80174|91|1457|22869|59336|10845|57649|1600|51400|25897|90381|7374|9928|378|80119|9219|9577|7422|23189|4799	http://amigo.geneontology.org/amigo/term/GO:0051171
hsa-miR-497-5p	GO:0032268	BP	regulation of cellular protein metabolic process	Gene Ontology	39	377	4.40102e-08	1.17499e-06	4082|595|8507|10270|4088|139285|11200|5601|6879|50488|3730|8945|55243|55294|1191|3643|11261|2889|5562|10818|63967|4214|54778|3600|10131|9113|136319|3720|51256|1994|51232|27250|4296|25897|22843|9928|1457|5813|55005	http://amigo.geneontology.org/amigo/term/GO:0032268
hsa-miR-497-5p	GO:0005615	CC	extracellular space	Gene Ontology	52	596	5.05243e-08	1.33747e-06	127018|3921|51504|55243|217|311|5048|550|6385|5648|55847|2195|23365|10576|376267|22836|976|11269|11080|5708|51246|1191|9748|10890|4141|10606|523|5604|403|6208|79701|3643|23332|3600|205|6584|830|23478|7128|388630|226|11315|268|23370|9045|23193|1432|222236|4735|4644|7203|9967	http://amigo.geneontology.org/amigo/term/GO:0005615
hsa-miR-497-5p	GO:0043230	CC	extracellular organelle	Gene Ontology	43	444	5.14828e-08	1.35518e-06	9261|29968|55243|9367|311|2776|6385|11320|2195|3308|6609|1173|10576|10857|1968|57826|7049|1778|51752|80331|2665|10606|1759|9987|403|79701|4691|23332|205|8202|3875|23478|8331|7128|136319|9748|23193|388630|5226|998|5872|55890|5499	http://amigo.geneontology.org/amigo/term/GO:0043230
hsa-miR-497-5p	GO:0031410	CC	cytoplasmic vesicle	Gene Ontology	33	289	5.90371e-08	1.54105e-06	3920|4891|2773|6814|9474|6609|9140|201627|8323|3312|56893|1191|6645|79803|9897|83992|8674|55664|83590|54520|23607|26958|9527|57082|5538|3643|23193|51375|7317|64145|351|153020|3998	http://amigo.geneontology.org/amigo/term/GO:0031410
hsa-miR-497-5p	GO:2000112	BP	regulation of cellular macromolecule biosynthetic process	Gene Ontology	53	619	6.60142e-08	1.70419e-06	10413|9757|8445|1875|3659|6879|9987|10691|9612|7049|140612|26155|1831|8945|8092|5515|54851|7514|84193|81620|25942|64919|4842|92715|10318|1545|6594|4090|60558|64750|998|9441|441478|9219|6670|5469|6648|4330|4791|10196|2551|84271|5604|5599|51351|6197|54625|351|23063|114803|5814|8939|25836	http://amigo.geneontology.org/amigo/term/GO:2000112
hsa-miR-497-5p	GO:0007166	BP	cell surface receptor signaling pathway	Gene Ontology	43	449	6.87007e-08	1.76382e-06	2889|595|79659|4087|8879|139285|5144|27|55294|596|5562|9958|51135|8239|7431|1545|54778|585|3588|3480|221393|4254|55273|2180|55788|1495|10379|91|8793|7049|219771|4139|51703|5599|10099|4739|998|378|1457|2674|285704|5601|8895	http://amigo.geneontology.org/amigo/term/GO:0007166
hsa-miR-497-5p	GO:0006796	BP	phosphate-containing compound metabolic process	Gene Ontology	44	468	7.86802e-08	1.99273e-06	9263|152559|1147|10327|10270|2773|2776|80829|3735|1859|5728|55243|7074|53354|8611|5781|51135|10818|4842|9958|4214|8867|208|10645|64768|5286|2180|3156|91|10423|5515|284996|51703|1432|22863|259230|51400|130399|4486|8454|8813|51429|9512|57147	http://amigo.geneontology.org/amigo/term/GO:0006796
hsa-miR-497-5p	GO:0051338	BP	regulation of transferase activity	Gene Ontology	22	142	9.25549e-08	2.32529e-06	55527|5604|6879|10576|80829|55294|1191|51719|2247|998|11315|80851|219771|51429|80174|27250|1600|5575|10114|22843|7074|51763	http://amigo.geneontology.org/amigo/term/GO:0051338
hsa-miR-497-5p	GO:0000278	BP	mitotic cell cycle	Gene Ontology	21	130	9.63472e-08	2.40325e-06	1111|3796|8945|9126|10270|5471|1613|596|6117|7840|8493|25836|8453|134353|5048|5527|595|8697|55142|26057|1654	http://amigo.geneontology.org/amigo/term/GO:0000278
hsa-miR-497-5p	GO:0009967	BP	positive regulation of signal transduction	Gene Ontology	32	284	1.22689e-07	3.00973e-06	9261|10413|4087|139285|64762|1613|5494|6452|6899|5728|1545|5708|161742|5562|1857|5781|51135|8904|4214|2850|441478|55824|5469|5048|91|120892|84336|7335|4296|7311|9908|57153	http://amigo.geneontology.org/amigo/term/GO:0009967
hsa-miR-497-5p	GO:0019438	BP	aromatic compound biosynthetic process	Gene Ontology	58	727	1.50081e-07	3.59695e-06	4302|29968|7128|6597|8239|9209|54778|79576|9149|498|5471|6874|8323|11338|9321|8945|10521|79960|1107|1191|3662|342371|285268|84193|2254|8904|51763|10260|84458|5166|56894|898|4335|2932|10606|1355|441478|5463|9826|4799|204851|226|268|59336|27250|7311|5324|1741|85460|54433|1457|2020|54625|23248|57154|8939|29068|55750	http://amigo.geneontology.org/amigo/term/GO:0019438
hsa-miR-497-5p	GO:0007275	BP	multicellular organism development	Gene Ontology	62	802	1.57208e-07	3.73908e-06	1967|50488|4087|93185|139285|1173|6814|9618|79576|3320|23228|1875|5601|3145|283659|6874|1386|5728|10521|55294|5376|7431|56259|545|2260|6208|889|4842|81029|8220|205|9529|55526|56623|9113|9444|27173|441478|3708|6670|91|268|5515|27130|3156|1026|22849|51232|6299|7311|5463|653464|55008|6239|688|351|55742|359845|7182|50937|2066|1495	http://amigo.geneontology.org/amigo/term/GO:0007275
hsa-miR-497-5p	GO:0051247	BP	positive regulation of protein metabolic process	Gene Ontology	26	201	1.68e-07	3.97558e-06	127933|10270|83593|63967|142679|112|6899|9810|1857|1399|5861|4214|54165|3600|894|54467|90441|120892|1994|1026|10845|5599|130399|9928|7422|84271	http://amigo.geneontology.org/amigo/term/GO:0051247
hsa-miR-497-5p	GO:0080090	BP	regulation of primary metabolic process	Gene Ontology	63	823	1.7242e-07	4.05966e-06	127933|4082|10413|8507|283106|9209|92797|83932|112|6594|1896|79365|4691|51351|1831|6648|347344|7203|1967|60468|51347|405|54467|84733|367|22980|1654|10196|84458|7074|8439|3480|3609|4335|8202|4254|998|3400|55291|8453|4799|6934|8450|6717|51444|10370|80034|143384|51429|167227|51400|6651|83463|23064|378|80119|9967|26108|351|29101|254251|1386|27107	http://amigo.geneontology.org/amigo/term/GO:0080090
hsa-miR-497-5p	GO:0005794	CC	Golgi apparatus	Gene Ontology	27	216	1.82517e-07	4.26526e-06	152559|607|79094|64326|11200|11320|60684|22878|23710|79845|8092|6510|26574|8614|10959|400|8905|56623|4218|5286|6482|57589|92370|27032|51107|1362|372	http://amigo.geneontology.org/amigo/term/GO:0005794
hsa-miR-497-5p	GO:0034613	BP	cellular protein localization	Gene Ontology	29	247	2.16543e-07	5.01043e-06	11260|23192|79576|26354|9874|23633|11138|11269|11014|10979|10890|122786|10628|55706|7514|162|9409|1173|10139|11276|8021|9045|6426|56947|2040|2339|7311|54908|57154	http://amigo.geneontology.org/amigo/term/GO:0034613
hsa-miR-497-5p	GO:0098805	CC	whole membrane	Gene Ontology	26	204	2.17905e-07	5.01717e-06	54495|6856|596|9367|4891|55207|112|9321|79803|7514|55847|64750|23130|3708|55788|9474|11336|162|163|27113|4170|5830|8992|5189|5573|9927	http://amigo.geneontology.org/amigo/term/GO:0098805
hsa-miR-497-5p	GO:0010604	BP	positive regulation of macromolecule metabolic process	Gene Ontology	42	454	2.29839e-07	5.24043e-06	2965|4335|10413|1147|283106|11200|3600|3659|83932|6609|10691|56919|3164|6874|5608|5728|7203|9817|56916|10959|51441|23175|253461|3667|4090|3480|10645|54566|6934|26354|4602|23192|25782|1600|908|9928|1457|51763|79364|84271|2066|1660	http://amigo.geneontology.org/amigo/term/GO:0010604
hsa-miR-497-5p	GO:0043168	MF	anion binding	Gene Ontology	42	454	2.29839e-07	5.24043e-06	9263|140901|3716|10000|79659|6597|11252|10730|8445|498|56919|490|10558|1968|3796|1613|167153|51776|29916|9807|1759|523|2768|8435|5166|55217|2776|9044|51703|84258|51166|5599|27032|4296|5573|378|9967|7422|351|55589|55585|7465	http://amigo.geneontology.org/amigo/term/GO:0043168
hsa-miR-497-5p	GO:0016787	MF	hydrolase activity	Gene Ontology	50	593	2.36649e-07	5.36959e-06	127018|4082|9459|6597|8178|9367|889|60528|55324|57406|9181|79659|6609|60682|831|54932|54878|253152|221294|8509|2665|5781|1759|23175|2260|347240|3667|10521|1133|400|23478|22908|28987|23255|10564|80034|56941|27113|51429|81611|51400|1809|57171|1107|1457|351|153020|29101|1741|1660	http://amigo.geneontology.org/amigo/term/GO:0016787
hsa-miR-497-5p	GO:0071705	BP	nitrogen compound transport	Gene Ontology	34	325	2.48544e-07	5.5988e-06	51517|9367|3064|550|6745|6890|6535|3308|11338|5494|376267|6538|55294|10087|2665|163486|3667|6584|84826|55788|6934|10564|6717|11315|8021|91056|29126|57153|5872|378|10921|153129|51763|415116	http://amigo.geneontology.org/amigo/term/GO:0071705
hsa-miR-497-5p	GO:0006950	BP	response to stress	Gene Ontology	49	578	2.68732e-07	6.0246e-06	2965|3716|50488|4170|4891|55527|6814|2776|6385|5648|3308|8323|976|22921|27|7320|2342|11200|9830|3516|5563|56603|1399|3998|2071|83590|754|8772|545|6890|83700|8454|1495|8450|10116|103|8793|6095|51715|55388|6400|1432|55161|27250|50813|89122|5728|7468|3980	http://amigo.geneontology.org/amigo/term/GO:0006950
hsa-miR-497-5p	GO:0010557	BP	positive regulation of macromolecule biosynthetic process	Gene Ontology	31	281	2.92326e-07	6.50687e-06	127933|56180|9757|5604|3659|9181|3673|9913|56970|2342|6597|545|2247|1654|64710|10318|9063|208|8202|998|79447|5324|9219|2932|4603|7337|92370|4297|865|116496|351	http://amigo.geneontology.org/amigo/term/GO:0010557
hsa-miR-497-5p	GO:0043161	BP	proteasome-mediated ubiquitin-dependent protein catabolic process	Gene Ontology	15	71	3.31811e-07	7.29906e-06	79845|154214|54778|23607|8945|51283|1191|54467|9817|550|9928|255488|84101|7126|5708	http://amigo.geneontology.org/amigo/term/GO:0043161
hsa-miR-497-5p	GO:0048522	BP	positive regulation of cellular process	Gene Ontology	59	768	3.78465e-07	8.22875e-06	8031|6597|4673|3064|64762|9618|6385|5604|153129|1432|6879|9181|10691|6594|11315|4691|1859|9913|831|56970|1191|3720|9810|1613|957|1857|6197|51135|545|25942|134353|1654|51763|10318|4090|27303|64393|3609|64750|2932|51360|6095|3156|51256|9647|3643|4791|84336|84333|10095|6299|84258|5573|7374|7203|7468|7422|23063|285704	http://amigo.geneontology.org/amigo/term/GO:0048522
hsa-miR-497-5p	GO:0051172	BP	negative regulation of nitrogen compound metabolic process	Gene Ontology	33	316	3.84905e-07	8.31093e-06	51804|10413|56180|23512|55509|10114|1859|7091|5515|11016|5562|55766|23152|1654|253461|3480|2932|6992|5048|5469|9647|80851|3643|9683|1994|5813|22849|7703|7764|51588|6239|3987|11261	http://amigo.geneontology.org/amigo/term/GO:0051172
hsa-miR-497-5p	GO:0016301	MF	kinase activity	Gene Ontology	28	241	4.21919e-07	9.00638e-06	283106|6385|5604|5608|7049|11261|10087|51191|51347|5781|51135|10818|9134|10645|2932|4254|103|9748|90441|8566|22863|1600|5575|5573|9928|9807|6197|1741	http://amigo.geneontology.org/amigo/term/GO:0016301
hsa-miR-497-5p	GO:0016773	MF	phosphotransferase activity, alcohol group as acceptor	Gene Ontology	28	241	4.21919e-07	9.00638e-06	2889|595|1147|64768|63967|10290|11200|112|80829|5608|85443|54956|10087|51719|1857|6041|545|2247|51763|51429|7049|143384|1432|27250|9928|1457|7422|415116	http://amigo.geneontology.org/amigo/term/GO:0016773
hsa-miR-497-5p	GO:0031328	BP	positive regulation of cellular biosynthetic process	Gene Ontology	29	256	4.25439e-07	9.04034e-06	127933|10413|56180|4088|55617|3667|5601|6879|6899|57826|55294|7203|54851|8178|84193|27303|367|54778|998|79447|3400|7126|11315|4791|7335|79960|908|9921|55005	http://amigo.geneontology.org/amigo/term/GO:0031328
hsa-miR-497-5p	GO:0009892	BP	negative regulation of metabolic process	Gene Ontology	38	402	5.23504e-07	1.09995e-05	127933|9612|9126|56180|161742|9757|153222|10105|7327|11261|3516|10628|1457|8904|2260|25942|4152|11180|9444|8331|4799|6934|8021|4791|9045|8357|80034|2551|1432|57649|8994|80119|9219|688|351|1386|2254|3156	http://amigo.geneontology.org/amigo/term/GO:0009892
hsa-miR-497-5p	GO:0032559	MF	adenyl ribonucleotide binding	Gene Ontology	29	259	5.2902e-07	1.10411e-05	53354|23047|984|60|8566|3320|10576|85443|7203|1111|1457|2260|1654|4214|205|1859|8395|204851|23438|3643|51701|255967|5599|5189|4644|4486|9967|55589|1660	http://amigo.geneontology.org/amigo/term/GO:0032559
hsa-miR-497-5p	GO:0051179	BP	localization	Gene Ontology	65	896	6.41853e-07	1.31615e-05	4087|889|6814|65055|3831|9908|6383|6041|10576|5608|6538|11138|977|8867|51715|26258|3454|140730|1191|79803|85465|58477|8925|79183|284439|2254|8904|60682|51209|10165|4842|55706|1138|54828|26958|208|23516|64145|84826|2180|2619|10564|91|56947|8697|5538|7049|57728|23294|51375|6542|10095|4297|54908|84804|79036|378|10921|7422|84230|27092|84313|57147|1741|10490	http://amigo.geneontology.org/amigo/term/GO:0051179
hsa-miR-497-5p	GO:0010629	BP	negative regulation of gene expression	Gene Ontology	32	309	6.78513e-07	1.38225e-05	127933|6597|200014|79094|3658|6879|5494|9810|3516|342371|7644|3842|55766|22893|100529215|83463|84458|3609|5324|8335|11315|5515|51441|79753|1432|6299|8994|7764|51588|7468|9883|25836	http://amigo.geneontology.org/amigo/term/GO:0010629
hsa-miR-497-5p	GO:0008134	MF	transcription factor binding	Gene Ontology	17	99	7.3935e-07	1.48361e-05	26155|1831|1432|3065|7091|898|55929|56919|3516|1613|3400|5469|5601|6934|9181|7975|2072	http://amigo.geneontology.org/amigo/term/GO:0008134
hsa-miR-497-5p	GO:0017016	MF	Ras GTPase binding	Gene Ontology	15	77	8.18166e-07	1.62782e-05	10152|10526|1434|79774|57589|7074|4296|4254|1857|64145|9826|7514|153020|10788|22836	http://amigo.geneontology.org/amigo/term/GO:0017016
hsa-miR-497-5p	GO:0042175	CC	nuclear outer membrane-endoplasmic reticulum membrane network	Gene Ontology	21	152	9.71341e-07	1.92441e-05	56894|6400|10087|84522|51493|375056|51246|11014|9367|94103|6184|54495|57085|2180|3156|5283|1896|3301|7841|3163|10490	http://amigo.geneontology.org/amigo/term/GO:0042175
hsa-miR-497-5p	GO:0015833	BP	peptide transport	Gene Ontology	30	284	1.03057e-06	2.03316e-05	6934|4891|6814|153222|5494|9874|22878|376267|3301|51715|55705|5903|26258|5861|79659|1173|580|54469|208|3156|3267|10564|3313|23545|57728|1434|4170|54828|84271|10490	http://amigo.geneontology.org/amigo/term/GO:0015833
hsa-miR-497-5p	GO:0004672	MF	protein kinase activity	Gene Ontology	24	195	1.10292e-06	2.16676e-05	9261|595|283106|112|9874|27|57826|55294|5255|7074|2889|1613|1857|23012|5781|2247|9134|91|9647|7049|142679|80174|27250|5575	http://amigo.geneontology.org/amigo/term/GO:0004672
hsa-miR-497-5p	GO:0000139	CC	Golgi membrane	Gene Ontology	18	115	1.16715e-06	2.27862e-05	57085|55291|57589|8509|56623|9527|56994|124583|55625|22908|10959|7355|10564|11227|26035|5861|22836|22820	http://amigo.geneontology.org/amigo/term/GO:0000139
hsa-miR-497-5p	GO:0003713	MF	transcription coactivator activity	Gene Ontology	13	59	1.32956e-06	2.56893e-05	7337|9321|8031|57826|10521|8202|865|9441|1386|6879|3159|114803|4791	http://amigo.geneontology.org/amigo/term/GO:0003713
hsa-miR-497-5p	GO:0045935	BP	positive regulation of nucleobase-containing compound metabolic process	Gene Ontology	28	257	1.34688e-06	2.5917e-05	607|1147|4087|1875|3659|56919|221937|8092|3454|7203|6597|5563|405|4842|208|10645|8202|3643|1432|55294|4297|7311|3014|23064|28996|688|9921|7182	http://amigo.geneontology.org/amigo/term/GO:0045935
hsa-miR-497-5p	GO:0006468	BP	protein phosphorylation	Gene Ontology	31	305	1.44308e-06	2.7486e-05	152559|55243|63967|728642|80829|51347|5608|5728|3454|1191|11261|2889|5563|545|2260|10818|3667|894|898|3609|4254|998|5129|5469|10114|8895|9928|2674|22881|2254|7465	http://amigo.geneontology.org/amigo/term/GO:0006468
hsa-miR-497-5p	GO:0004674	MF	protein serine/threonine kinase activity	Gene Ontology	18	117	1.45531e-06	2.76067e-05	5515|4214|892|50488|1147|51701|5599|3480|29959|5573|5728|127933|5604|2180|204851|55589|415116|5165	http://amigo.geneontology.org/amigo/term/GO:0004674
hsa-miR-497-5p	GO:0030163	BP	protein catabolic process	Gene Ontology	17	105	1.52091e-06	2.87348e-05	7337|23607|2768|8945|51283|55294|54467|8239|3320|8454|51449|219333|5708|84313|5538|54926|55905	http://amigo.geneontology.org/amigo/term/GO:0030163
hsa-miR-497-5p	GO:1903507	BP	negative regulation of nucleic acid-templated transcription	Gene Ontology	22	171	1.57973e-06	2.96666e-05	10413|23466|6597|200014|28996|6929|5494|10971|7091|8804|7514|23152|3609|8331|286205|7644|85235|4152|59336|22849|79365|5814	http://amigo.geneontology.org/amigo/term/GO:1903507
hsa-miR-497-5p	GO:0031090	CC	organelle membrane	Gene Ontology	42	493	1.66907e-06	3.11571e-05	54495|56994|550|10730|498|10423|9140|376267|22836|23225|10857|5099|51715|51303|11222|92014|80331|7514|23175|9681|55186|64116|998|1355|1595|2180|5537|3156|3703|57222|10195|4170|4711|92370|1182|8992|8763|9512|55144|155066|57153|56947	http://amigo.geneontology.org/amigo/term/GO:0031090
hsa-miR-497-5p	GO:0048869	BP	cellular developmental process	Gene Ontology	48	601	1.68818e-06	3.13888e-05	152559|65059|10678|10413|9204|139285|2776|3799|9757|9639|23228|23424|1111|5728|27|7320|79803|10890|122786|3796|54851|51599|26258|10818|55526|23332|1613|208|441478|10087|56896|6670|5048|5469|103|120892|4152|6385|7335|22849|11200|1600|1809|2889|25836|6239|688|5813	http://amigo.geneontology.org/amigo/term/GO:0048869
hsa-miR-497-5p	GO:0043169	MF	cation binding	Gene Ontology	50	641	1.93036e-06	3.53309e-05	154214|10270|120114|23512|2774|333|8445|64207|4644|26286|5494|6609|23349|976|55290|1545|51199|79960|51573|2820|8493|7772|5922|64718|8904|56138|7730|4214|51283|5728|55625|1595|6732|5537|6670|3268|100529215|55596|84333|8897|4297|89122|164832|56888|7586|7741|688|255488|9512|3981	http://amigo.geneontology.org/amigo/term/GO:0043169
hsa-miR-497-5p	GO:0099080	CC	supramolecular complex	Gene Ontology	23	188	2.00826e-06	3.65425e-05	1780|3064|6645|113146|1613|7514|7431|1759|3998|4842|23607|55605|57082|10788|23279|147841|255967|4296|4134|4644|8761|54908|54828	http://amigo.geneontology.org/amigo/term/GO:0099080
hsa-miR-497-5p	GO:0005576	CC	extracellular region	Gene Ontology	55	736	2.03017e-06	3.67983e-05	3920|93185|889|55187|333|3320|26354|9987|25836|376267|4691|10971|55664|4141|1778|1111|51752|83700|2745|81029|400|7730|5861|10669|1654|253461|55845|3600|1173|4253|4218|8455|8335|388630|23370|219771|284996|1434|2247|1432|51232|146223|10099|8991|7311|5226|4644|5872|5819|3842|147015|64145|2254|8895|50937	http://amigo.geneontology.org/amigo/term/GO:0005576
hsa-miR-497-5p	GO:0009891	BP	positive regulation of biosynthetic process	Gene Ontology	31	311	2.09146e-06	3.77631e-05	4088|55617|65056|9757|5604|10691|23633|4691|8092|3454|2342|6197|1857|6041|26108|25942|1654|64710|3667|3600|60558|4335|4254|3400|3643|6239|7311|9967|2020|688|114803	http://amigo.geneontology.org/amigo/term/GO:0009891
hsa-miR-497-5p	GO:0016817	MF	hydrolase activity, acting on acid anhydrides	Gene Ontology	24	206	2.63389e-06	4.71034e-05	6594|9367|9928|6903|92797|10105|22836|60682|57171|60626|1967|1857|8490|84340|26297|5862|3831|10521|60558|4218|3070|5872|1107|1660	http://amigo.geneontology.org/amigo/term/GO:0016817
hsa-miR-497-5p	GO:0001882	MF	nucleoside binding	Gene Ontology	13	64	2.92429e-06	5.2098e-05	9258|60558|51184|2774|58477|5872|378|2665|2776|64225|9367|5861|26354	http://amigo.geneontology.org/amigo/term/GO:0001882
hsa-miR-497-5p	GO:0061919	BP	process utilizing autophagic mechanism	Gene Ontology	17	111	2.98422e-06	5.29643e-05	51715|27|4943|596|5599|3920|5562|1613|3320|8925|23192|23255|7182|57154|84313|23545|23710	http://amigo.geneontology.org/amigo/term/GO:0061919
hsa-miR-497-5p	GO:0033036	BP	macromolecule localization	Gene Ontology	37	418	3.03758e-06	5.36067e-05	130340|3920|596|550|51517|4691|7327|92345|11014|5565|11261|9817|5193|55706|10959|29916|523|90196|5861|4842|10526|4087|580|113402|51134|4218|23545|6400|2254|2665|4735|3842|54908|3098|1660|1741|10490	http://amigo.geneontology.org/amigo/term/GO:0033036
hsa-miR-497-5p	GO:0050790	BP	regulation of catalytic activity	Gene Ontology	33	351	3.18059e-06	5.58151e-05	4296|9459|283106|2774|5604|3716|3673|6609|8131|3730|57826|4943|11261|51191|51400|10959|400|9681|2260|10260|208|5531|51429|120892|80851|51256|2665|51232|4735|1600|79774|653464|23385	http://amigo.geneontology.org/amigo/term/GO:0050790
hsa-miR-497-5p	GO:0010033	BP	response to organic substance	Gene Ontology	40	472	3.28649e-06	5.74584e-05	9261|3065|7311|143686|7049|5601|6879|112|23189|3730|8867|51283|3454|5723|10890|1133|405|6041|8904|2260|10521|3662|898|8202|3875|5286|57085|6520|1495|9927|8793|3643|6400|9392|5573|1809|56603|7422|155066|3156	http://amigo.geneontology.org/amigo/term/GO:0010033
hsa-miR-497-5p	GO:0006351	BP	transcription, DNA-templated	Gene Ontology	47	599	3.35553e-06	5.84474e-05	54458|9612|6597|84444|64061|9987|1871|9321|27107|55290|8945|347344|3454|1107|7772|140612|2247|56252|54778|199692|3662|898|55929|3609|5728|79447|22921|4799|7644|6648|9647|3643|10370|8357|80034|359948|7703|7586|51058|83463|378|10921|51763|79364|23248|84271|8939	http://amigo.geneontology.org/amigo/term/GO:0006351
hsa-miR-497-5p	GO:0006611	BP	protein export from nucleus	Gene Ontology	9	27	3.39772e-06	5.8854e-05	7514|6426|54890|580|23511|10921|10762|5781|23279	http://amigo.geneontology.org/amigo/term/GO:0006611
hsa-miR-497-5p	GO:0051649	BP	establishment of localization in cell	Gene Ontology	13	66	3.93387e-06	6.7517e-05	585|3064|25998|7074|51134|4134|9474|3708|10959|5537|9181|2247|51203	http://amigo.geneontology.org/amigo/term/GO:0051649
hsa-miR-497-5p	GO:0030030	BP	cell projection organization	Gene Ontology	22	182	3.96289e-06	6.77669e-05	8507|596|4891|3064|5604|6383|112|7832|3730|5357|138639|3798|2889|5781|7422|9529|2932|6738|150737|23064|51763|54828	http://amigo.geneontology.org/amigo/term/GO:0030030
hsa-miR-497-5p	GO:0042578	MF	phosphoric ester hydrolase activity	Gene Ontology	15	89	4.00703e-06	6.82725e-05	3628|23523|142679|81611|1133|5723|11261|55589|22843|8493|56623|57082|23035|5775|54583	http://amigo.geneontology.org/amigo/term/GO:0042578
hsa-miR-497-5p	GO:1901565	BP	organonitrogen compound catabolic process	Gene Ontology	21	168	4.06841e-06	6.90672e-05	253980|5728|7327|7128|8507|580|84101|7267|1457|998|64326|51752|7514|131870|23014|255488|5527|6609|9683|5538|11261	http://amigo.geneontology.org/amigo/term/GO:1901565
hsa-miR-497-5p	GO:0006886	BP	intracellular protein transport	Gene Ontology	19	141	4.35718e-06	7.34668e-05	130340|4082|2254|1432|11260|1434|5193|79576|6745|55705|29916|58477|23255|9697|8905|11338|57154|6208|6400	http://amigo.geneontology.org/amigo/term/GO:0006886
hsa-miR-497-5p	GO:0043632	BP	modification-dependent macromolecule catabolic process	Gene Ontology	14	78	4.39029e-06	7.34668e-05	154214|54778|23607|8945|54467|83590|9817|9810|5728|139285|9928|9683|54926|55905	http://amigo.geneontology.org/amigo/term/GO:0043632
hsa-miR-497-5p	GO:0061659	MF	ubiquitin-like protein ligase activity	Gene Ontology	11	46	4.3785e-06	7.34668e-05	284996|154214|7335|143384|51283|51343|9063|8454|8453|54926|9867	http://amigo.geneontology.org/amigo/term/GO:0061659
hsa-miR-497-5p	GO:0033554	BP	cellular response to stress	Gene Ontology	30	309	4.90489e-06	8.13517e-05	2965|10413|4891|6745|8445|5601|5499|10105|23710|6780|7327|7320|7074|3516|58477|1857|405|83590|10131|79447|8453|54956|120892|3312|55161|7335|90441|116138|6197|50813	http://amigo.geneontology.org/amigo/term/GO:0033554
hsa-miR-497-5p	GO:0071363	BP	cellular response to growth factor stimulus	Gene Ontology	17	116	5.06477e-06	8.37072e-05	7311|9261|4090|9392|1191|64762|54778|3516|55273|23064|405|28996|351|2254|6899|57154|10370	http://amigo.geneontology.org/amigo/term/GO:0071363
hsa-miR-497-5p	GO:0030154	BP	cell differentiation	Gene Ontology	45	574	5.4883e-06	9.00716e-05	152559|2889|50488|1147|8507|139285|10290|2619|23228|28996|6929|9181|6899|1896|3730|5728|7320|84894|25960|7074|9817|5316|54851|405|6041|26258|55740|2260|55526|2117|2551|8772|23528|55273|3800|1495|5469|120892|4139|1967|79739|1386|3987|2066|57622	http://amigo.geneontology.org/amigo/term/GO:0030154
hsa-miR-497-5p	GO:0005789	CC	endoplasmic reticulum membrane	Gene Ontology	20	158	5.77258e-06	9.42419e-05	10857|57171|6400|1545|56893|56894|11014|79982|6184|85465|11161|6745|6890|81562|10237|51246|64225|10490|3163|22820	http://amigo.geneontology.org/amigo/term/GO:0005789
hsa-miR-497-5p	GO:0010558	BP	negative regulation of macromolecule biosynthetic process	Gene Ontology	24	217	5.91914e-06	9.59659e-05	51804|8507|4088|23512|200014|79576|64061|8545|8945|55766|25942|253461|55929|3609|6934|8335|5469|55509|9044|862|7311|3014|2254|5814	http://amigo.geneontology.org/amigo/term/GO:0010558
hsa-miR-497-5p	GO:0051254	BP	positive regulation of RNA metabolic process	Gene Ontology	24	217	5.91914e-06	9.59659e-05	1147|1871|3164|9321|221937|8092|54851|1857|1111|2071|9063|23528|10645|8202|9441|285704|91|22849|3643|84333|51763|79364|7182|2066	http://amigo.geneontology.org/amigo/term/GO:0051254
hsa-miR-497-5p	GO:0007267	BP	cell-cell signaling	Gene Ontology	26	249	6.36572e-06	0.000102497	595|50488|23228|10413|5563|8323|3798|3516|5562|1857|1759|367|1133|9113|2932|4218|25769|3156|11315|5538|1432|5693|26108|22881|2254|1741	http://amigo.geneontology.org/amigo/term/GO:0007267
hsa-miR-497-5p	GO:1902531	BP	regulation of intracellular signal transduction	Gene Ontology	28	282	6.82739e-06	0.000109554	8445|23365|5527|5494|3301|1859|27244|11261|1111|51776|1399|2260|26057|284996|9529|754|8395|4254|998|11215|6717|7337|27113|1432|7311|51588|1457|2066	http://amigo.geneontology.org/amigo/term/GO:1902531
hsa-miR-497-5p	GO:0140096	MF	catalytic activity, acting on a protein	Gene Ontology	40	488	6.85242e-06	0.00010958	127018|54726|152559|283106|55527|84444|2776|11320|127933|5601|5499|5728|5708|2342|1191|51191|5193|6041|2254|84056|140901|23512|3662|54467|10290|54813|2180|51504|8450|5469|7337|7335|1026|5255|25897|9928|7074|4486|63929|27351	http://amigo.geneontology.org/amigo/term/GO:0140096
hsa-miR-497-5p	GO:0016887	MF	ATPase activity	Gene Ontology	12	59	6.91473e-06	0.000110201	11269|4363|84515|55605|164832|3800|10730|3320|92797|84056|9044|1660	http://amigo.geneontology.org/amigo/term/GO:0016887
hsa-miR-497-5p	GO:0048585	BP	negative regulation of response to stimulus	Gene Ontology	24	220	7.31009e-06	0.000115527	596|4088|55527|92797|3065|3064|8131|7327|8945|1857|1759|10625|10318|9529|754|2932|219699|1495|6717|7049|388630|27250|51588|103	http://amigo.geneontology.org/amigo/term/GO:0048585
hsa-miR-497-5p	GO:0000122	BP	negative regulation of transcription by RNA polymerase II	Gene Ontology	17	123	1.01512e-05	0.000157495	28996|2551|57649|6299|55929|7311|60468|342371|441478|80712|4799|3065|153222|5469|100529215|3720|1386	http://amigo.geneontology.org/amigo/term/GO:0000122
hsa-miR-497-5p	GO:0016818	MF	hydrolase activity, acting on acid anhydrides, in phosphorus-containing anhydrides	Gene Ontology	24	227	1.17803e-05	0.000181269	3716|56916|1780|10730|26354|64225|8131|51715|957|8925|9567|55154|2071|57568|208|55324|84705|51256|167227|5872|2674|54828|2254|9927	http://amigo.geneontology.org/amigo/term/GO:0016818
hsa-miR-497-5p	GO:0003676	MF	nucleic acid binding	Gene Ontology	40	501	1.20912e-05	0.000185142	9204|51804|6597|4088|200014|55509|11052|6603|83932|1871|80829|6874|25888|353274|54932|1964|1967|55421|131870|25942|64919|2117|84458|4335|84515|9444|9441|57693|3159|8357|22869|80174|115752|127933|1875|8664|192670|9921|5917|5814	http://amigo.geneontology.org/amigo/term/GO:0003676
hsa-miR-497-5p	GO:0000166	MF	nucleotide binding	Gene Ontology	33	377	1.2547e-05	0.000191495	4329|53354|9126|55341|8566|9149|26354|112|124540|51347|22913|9221|4691|9928|57826|4363|5563|10606|23112|545|51493|155435|8395|2932|150465|255967|80179|5189|23064|9881|4850|3980|55750	http://amigo.geneontology.org/amigo/term/GO:0000166
hsa-miR-497-5p	GO:1903508	BP	positive regulation of nucleic acid-templated transcription	Gene Ontology	25	244	1.27824e-05	0.000194139	607|51804|6594|9063|6874|51360|79960|26574|54851|23175|4842|64710|10318|892|3609|10645|8202|7008|6670|4603|2551|7311|54828|285704|50937	http://amigo.geneontology.org/amigo/term/GO:1903508
hsa-miR-497-5p	GO:0050657	BP	nucleic acid transport	Gene Ontology	9	33	1.32908e-05	0.000200561	11269|84271|23511|9444|3800|9908|3267|8021|23279	http://amigo.geneontology.org/amigo/term/GO:0050657
hsa-miR-497-5p	GO:0001934	BP	positive regulation of protein phosphorylation	Gene Ontology	17	126	1.34722e-05	0.000202645	9261|1026|55294|1191|1600|64762|51719|219771|22863|4486|2180|3156|208|6899|2247|5515|2254	http://amigo.geneontology.org/amigo/term/GO:0001934
hsa-miR-497-5p	GO:0097708	CC	intracellular vesicle	Gene Ontology	26	261	1.35936e-05	0.000203817	130340|9140|4891|6814|23080|399979|90809|1738|4943|11014|201627|11261|2889|83992|55664|3600|6520|11276|55788|1495|6717|81614|56947|11252|4644|23385	http://amigo.geneontology.org/amigo/term/GO:0097708
hsa-miR-497-5p	GO:0009894	BP	regulation of catabolic process	Gene Ontology	18	141	1.49926e-05	0.00022301	53373|10670|51429|9529|56893|22863|139285|9817|64768|9474|55802|7327|5499|7128|22849|9683|3312|1660	http://amigo.geneontology.org/amigo/term/GO:0009894
hsa-miR-497-5p	GO:0065009	BP	regulation of molecular function	Gene Ontology	41	525	1.53029e-05	0.000226734	2965|152559|3716|50488|596|9367|55527|57569|3320|3600|9181|10576|5538|7074|7049|9830|4087|51719|10628|10959|2745|5922|83464|4842|1545|3667|58487|898|5144|4883|9826|23255|57082|26286|80851|5515|4791|51256|80119|1457|1386	http://amigo.geneontology.org/amigo/term/GO:0065009
hsa-miR-497-5p	GO:0070925	BP	organelle assembly	Gene Ontology	15	101	1.5562e-05	0.000228935	259266|51715|11200|8897|3064|1778|55720|6385|9639|8994|3267|57082|6738|9140|84313	http://amigo.geneontology.org/amigo/term/GO:0070925
hsa-miR-497-5p	GO:0099512	CC	supramolecular fiber	Gene Ontology	18	142	1.63408e-05	0.000238764	6334|3796|79659|8867|55605|1783|1778|1809|9928|6385|1780|79739|4842|51517|10564|226|10788|51203	http://amigo.geneontology.org/amigo/term/GO:0099512
hsa-miR-497-5p	GO:0008283	BP	cell population proliferation	Gene Ontology	30	333	1.85471e-05	0.000268217	3716|595|23512|64762|5604|6929|8323|55294|2889|957|4515|8493|8611|8406|1399|2247|2117|55198|51135|4254|998|3070|120892|1432|5243|23385|9921|1386|50937|10490	http://amigo.geneontology.org/amigo/term/GO:0008283
hsa-miR-497-5p	GO:0040011	BP	locomotion	Gene Ontology	25	250	1.86081e-05	0.000268272	51804|57406|6385|23189|120892|1901|8092|6477|8611|5781|4967|23294|2768|375056|8772|208|286205|9647|29126|80031|8895|5872|378|6239|7422	http://amigo.geneontology.org/amigo/term/GO:0040011
hsa-miR-497-5p	GO:0044255	BP	cellular lipid metabolic process	Gene Ontology	21	188	1.93061e-05	0.000275789	8879|56894|25942|10818|51573|259230|171586|36|998|5563|9807|5601|3156|6383|5048|128|8813|2260|2247|2820|90809	http://amigo.geneontology.org/amigo/term/GO:0044255
hsa-miR-497-5p	GO:0043066	BP	negative regulation of apoptotic process	Gene Ontology	19	159	2.03685e-05	0.000289641	26155|25942|7320|7703|51283|4088|3480|3064|9928|55179|831|6934|208|5469|6648|5538|64919|1654|9529	http://amigo.geneontology.org/amigo/term/GO:0043066
hsa-miR-497-5p	GO:0045893	BP	positive regulation of transcription, DNA-templated	Gene Ontology	24	236	2.11172e-05	0.000299379	56180|54778|9757|11200|64207|1875|3659|6874|3643|54851|1111|1654|892|10521|3662|2932|65056|5324|91|4602|10370|7422|285704|8939	http://amigo.geneontology.org/amigo/term/GO:0045893
hsa-miR-497-5p	GO:0006915	BP	apoptotic process	Gene Ontology	28	302	2.16435e-05	0.000305453	55201|7818|7126|26155|580|7074|1613|2071|10625|3916|5166|208|4254|9826|1495|204851|10116|120892|51703|1432|728642|8879|6655|6651|7374|51107|23385|9927	http://amigo.geneontology.org/amigo/term/GO:0006915
hsa-miR-497-5p	GO:0070727	BP	cellular macromolecule localization	Gene Ontology	22	206	2.327e-05	0.000327423	127933|10670|65055|150737|22878|11014|122786|1857|10959|90196|1173|754|23279|57728|6426|9392|79774|54828|23063|2254|2066|9927	http://amigo.geneontology.org/amigo/term/GO:0070727
hsa-miR-497-5p	GO:0000151	CC	ubiquitin ligase complex	Gene Ontology	9	36	2.40086e-05	0.000336804	892|996|6400|60468|8454|9577|7126|54165|3301	http://amigo.geneontology.org/amigo/term/GO:0000151
hsa-miR-497-5p	GO:0006661	BP	phosphatidylinositol biosynthetic process	Gene Ontology	7	19	2.511e-05	0.000350679	2254|8395|22908|8813|5781|2247|51763	http://amigo.geneontology.org/amigo/term/GO:0006661
hsa-miR-497-5p	GO:0051726	BP	regulation of cell cycle	Gene Ontology	17	134	2.75327e-05	0.000382235	127933|1875|10670|5573|2619|219771|11200|8454|9577|10370|545|5494|134353|4850|5608|7465|51203	http://amigo.geneontology.org/amigo/term/GO:0051726
hsa-miR-497-5p	GO:0005924	CC	cell-substrate adherens junction	Gene Ontology	11	58	2.93543e-05	0.000405124	976|26574|9817|60|5819|64326|1495|55740|3673|81848|3313	http://amigo.geneontology.org/amigo/term/GO:0005924
hsa-miR-497-5p	GO:0032501	BP	multicellular organismal process	Gene Ontology	69	1100	2.9298e-05	0.000405124	10087|596|54477|10564|79094|6385|5604|80712|5601|7975|7832|6874|490|5608|27092|5357|9529|27|6648|3798|51107|6597|8761|4791|8614|405|6239|56259|367|55742|64919|9063|4335|1399|898|351|5144|64750|10621|4330|710|6732|831|6670|57082|128|3799|7049|10247|10370|6542|29126|5813|29123|7703|3200|4297|11174|8994|9928|378|57050|2020|8763|55589|63929|7182|372|80114	http://amigo.geneontology.org/amigo/term/GO:0032501
hsa-miR-497-5p	GO:0022008	BP	neurogenesis	Gene Ontology	22	210	3.04023e-05	0.000414701	4082|5376|50488|5604|51804|5601|23189|56896|2889|81029|8904|219699|1495|8450|6299|4134|653464|7764|378|7422|79191|57154	http://amigo.geneontology.org/amigo/term/GO:0022008
hsa-miR-497-5p	GO:0031324	BP	negative regulation of cellular metabolic process	Gene Ontology	31	360	3.02664e-05	0.000414701	51804|8507|56180|8239|200014|11200|3658|3659|120892|3301|26155|55294|11016|9810|161742|84733|10131|23076|8331|3156|10114|84101|51400|7311|80119|25836|351|23063|79365|3980|1660	http://amigo.geneontology.org/amigo/term/GO:0031324
hsa-miR-497-5p	GO:0023014	BP	signal transduction by protein phosphorylation	Gene Ontology	18	150	3.1664e-05	0.000430034	51776|9261|2254|50488|1147|27250|5515|64762|5562|130399|51347|4486|8454|5601|51135|10114|2247|9748	http://amigo.geneontology.org/amigo/term/GO:0023014
hsa-miR-497-5p	GO:0031967	CC	organelle envelope	Gene Ontology	19	165	3.23876e-05	0.000437958	56894|27113|54956|10131|51246|4088|10166|51343|4720|51703|7514|11222|351|255488|5048|79188|3164|80347|27346	http://amigo.geneontology.org/amigo/term/GO:0031967
hsa-miR-497-5p	GO:0006401	BP	RNA catabolic process	Gene Ontology	10	48	3.34411e-05	0.000450254	3921|167227|115752|1975|7311|7514|192670|23112|7832|9045	http://amigo.geneontology.org/amigo/term/GO:0006401
hsa-miR-497-5p	GO:0006412	BP	translation	Gene Ontology	13	83	3.45033e-05	0.000463224	1994|7311|55052|9444|4141|54998|11222|9801|23112|84271|128308|10247|27303	http://amigo.geneontology.org/amigo/term/GO:0006412
hsa-miR-497-5p	GO:0051603	BP	proteolysis involved in cellular protein catabolic process	Gene Ontology	14	97	3.92526e-05	0.000518079	9928|57154|9529|54467|7317|51343|2932|64326|23607|219333|8697|147339|54926|6477	http://amigo.geneontology.org/amigo/term/GO:0051603
hsa-miR-497-5p	GO:0009725	BP	response to hormone	Gene Ontology	18	153	4.00992e-05	0.000527026	57085|10628|5728|2650|10521|596|9113|9817|23175|5872|5781|523|3673|367|7182|490|23189|64710	http://amigo.geneontology.org/amigo/term/GO:0009725
hsa-miR-497-5p	GO:0043043	BP	peptide biosynthetic process	Gene Ontology	16	125	4.25932e-05	0.000555906	10318|5813|1994|8507|283459|4677|4141|90381|123283|1964|8761|7818|51504|9567|136319|23438	http://amigo.geneontology.org/amigo/term/GO:0043043
hsa-miR-497-5p	GO:0045944	BP	positive regulation of transcription by RNA polymerase II	Gene Ontology	19	169	4.35761e-05	0.000567155	80034|2965|51360|4691|10413|56180|865|23064|10691|1654|6934|23175|6899|84333|1386|64710|8939|23633|1901	http://amigo.geneontology.org/amigo/term/GO:0045944
hsa-miR-497-5p	GO:0016874	MF	ligase activity	Gene Ontology	11	61	4.41533e-05	0.000572283	8945|580|283459|57531|64750|6477|5903|79739|55008|5917|51493	http://amigo.geneontology.org/amigo/term/GO:0016874
hsa-miR-497-5p	GO:0031327	BP	negative regulation of cellular biosynthetic process	Gene Ontology	23	232	4.46081e-05	0.000576583	8507|200014|6929|3065|5494|221937|1831|8804|7514|545|25942|22980|55929|286205|10370|7703|4152|2551|7730|57649|6299|3014|1386	http://amigo.geneontology.org/amigo/term/GO:0031327
hsa-miR-497-5p	GO:0005694	CC	chromosome	Gene Ontology	17	140	4.54326e-05	0.000585624	114785|25942|7703|4087|4088|23512|6117|8349|3662|1107|1780|80119|8330|3065|3159|51444|1386	http://amigo.geneontology.org/amigo/term/GO:0005694
hsa-miR-497-5p	GO:0071944	CC	cell periphery	Gene Ontology	54	812	5.18151e-05	0.000661525	1147|157|4088|83590|2774|333|57406|6385|498|5499|1896|8323|60682|5357|220963|51573|6645|11261|3749|51347|2936|55573|51135|523|8904|55742|139285|977|1173|51283|6584|3588|54207|2932|2850|998|8455|51449|23196|3312|3643|81848|10015|57728|84109|51232|8895|5531|81619|130399|56122|51094|113146|57217	http://amigo.geneontology.org/amigo/term/GO:0071944
hsa-miR-497-5p	GO:0031252	CC	cell leading edge	Gene Ontology	10	51	5.24957e-05	0.000668393	65059|10788|51429|11252|1495|351|5048|154810|25800|51763	http://amigo.geneontology.org/amigo/term/GO:0031252
hsa-miR-497-5p	GO:0051347	BP	positive regulation of transferase activity	Gene Ontology	13	87	5.33452e-05	0.000676452	4214|10818|80174|1191|4296|4254|9618|998|5604|4486|1399|2247|5608	http://amigo.geneontology.org/amigo/term/GO:0051347
hsa-miR-497-5p	GO:0032989	BP	cellular component morphogenesis	Gene Ontology	18	157	5.44231e-05	0.000688257	65059|56896|3799|351|84894|7074|1600|51804|8994|5604|161176|10678|6903|5781|54437|9181|55742|23189	http://amigo.geneontology.org/amigo/term/GO:0032989
hsa-miR-497-5p	GO:0070062	CC	extracellular exosome	Gene Ontology	35	445	5.45771e-05	0.000688348	217|375791|3916|55187|2776|6385|8349|498|2195|136319|490|3312|57826|5693|7203|203068|10015|1690|6208|55198|3920|1399|754|3875|5286|8455|6717|10788|9980|23193|51429|2040|51246|4134|11014	http://amigo.geneontology.org/amigo/term/GO:0070062
hsa-miR-497-5p	GO:0097190	BP	apoptotic signaling pathway	Gene Ontology	15	114	5.51137e-05	0.00069232	5728|51703|4170|90441|55294|1191|3875|7818|1613|64393|219699|1495|7128|2260|5499	http://amigo.geneontology.org/amigo/term/GO:0097190
hsa-miR-497-5p	GO:0003924	MF	GTPase activity	Gene Ontology	18	158	5.86454e-05	0.000732755	5048|10564|3716|51429|84340|5861|79774|2776|64744|25782|208|10959|403|1759|9567|201627|23370|60682	http://amigo.geneontology.org/amigo/term/GO:0003924
hsa-miR-497-5p	GO:0006511	BP	ubiquitin-dependent protein catabolic process	Gene Ontology	13	88	5.92614e-05	0.000738482	6400|9683|8237|9529|9354|54467|7267|6477|54926|9928|255488|8697|120892	http://amigo.geneontology.org/amigo/term/GO:0006511
hsa-miR-497-5p	GO:1903047	BP	mitotic cell cycle process	Gene Ontology	15	115	6.02876e-05	0.000747296	1111|5728|6117|6597|898|5527|4218|90381|998|8493|8454|9181|25942|3643|7840	http://amigo.geneontology.org/amigo/term/GO:1903047
hsa-miR-497-5p	GO:1990234	CC	transferase complex	Gene Ontology	15	115	6.02876e-05	0.000747296	122830|1147|55294|56970|22863|3720|375743|51588|25948|26168|5469|23014|2339|7126|80012	http://amigo.geneontology.org/amigo/term/GO:1990234
hsa-miR-497-5p	GO:1901987	BP	regulation of cell cycle phase transition	Gene Ontology	10	52	6.06183e-05	0.000749411	1026|595|79960|1642|84101|6597|79447|9700|8697|7832	http://amigo.geneontology.org/amigo/term/GO:1901987
hsa-miR-497-5p	GO:0048731	BP	system development	Gene Ontology	48	701	6.90185e-05	0.00084435	51804|84522|6597|4088|8239|3800|79576|1875|5601|6383|5471|3673|221937|6874|399979|60682|4691|10971|1191|56603|4087|8925|10959|23294|23332|10521|898|9113|4883|4254|1495|6717|54583|4791|162|10818|2247|3200|7764|57050|6197|688|54437|359845|55585|5814|2066|80114	http://amigo.geneontology.org/amigo/term/GO:0048731
hsa-miR-497-5p	GO:0080134	BP	regulation of response to stress	Gene Ontology	21	207	6.95755e-05	0.000848948	7311|51776|7335|4296|6542|55161|9469|55527|51191|6117|5903|28996|92797|5048|153222|22881|3673|11315|57154|3659|23225	http://amigo.geneontology.org/amigo/term/GO:0080134
hsa-miR-497-5p	GO:0045089	BP	positive regulation of innate immune response	Gene Ontology	10	53	6.97853e-05	0.000849297	7335|8772|661|5693|8454|3659|51135|10621|10695|5608	http://amigo.geneontology.org/amigo/term/GO:0045089
hsa-miR-497-5p	GO:0016310	BP	phosphorylation	Gene Ontology	30	360	6.99782e-05	0.000849437	595|64768|64762|103|9874|57826|7074|7049|29959|23012|1399|10818|80025|205|5165|9134|3609|10461|226|3643|90441|5599|5575|5631|23064|1191|1457|65975|415116|2066	http://amigo.geneontology.org/amigo/term/GO:0016310
hsa-miR-497-5p	GO:0031331	BP	positive regulation of cellular catabolic process	Gene Ontology	12	77	7.14215e-05	0.000862489	5728|9469|2040|55294|754|25897|9810|2932|120892|51444|3643|11315	http://amigo.geneontology.org/amigo/term/GO:0031331
hsa-miR-497-5p	GO:0051301	BP	cell division	Gene Ontology	13	90	7.28219e-05	0.000877139	259266|894|9113|3796|64762|1613|5048|57082|51429|2254|55142|8239|10015	http://amigo.geneontology.org/amigo/term/GO:0051301
hsa-miR-497-5p	GO:0032553	MF	ribonucleotide binding	Gene Ontology	26	292	7.75046e-05	0.000928767	79677|1147|3800|28996|6041|85443|11269|4677|2982|4141|58477|5563|203068|347240|5165|3480|2180|3313|51703|5832|2665|5631|378|80119|65975|2066	http://amigo.geneontology.org/amigo/term/GO:0032553
hsa-miR-497-5p	GO:0010628	BP	positive regulation of gene expression	Gene Ontology	25	275	7.78908e-05	0.000931014	2965|8178|28996|5562|23633|8945|79960|54851|4791|56603|84193|1654|64710|2932|9826|9586|6934|4602|7182|116496|26108|351|1386|84271|55005	http://amigo.geneontology.org/amigo/term/GO:0010628
hsa-miR-497-5p	GO:0030111	BP	regulation of Wnt signaling pathway	Gene Ontology	10	54	8.01035e-05	0.000948988	1432|6299|6597|2889|2932|441478|1457|2247|5515|8323	http://amigo.geneontology.org/amigo/term/GO:0030111
hsa-miR-497-5p	GO:0019637	BP	organophosphate metabolic process	Gene Ontology	18	163	8.44103e-05	0.00099373	8050|8897|6095|55526|6609|957|5286|1133|2820|498|3156|226|8904|2260|57153|1741|2066|51763	http://amigo.geneontology.org/amigo/term/GO:0019637
hsa-miR-497-5p	GO:0006289	BP	nucleotide-excision repair	Gene Ontology	7	24	8.59674e-05	0.00100574	2965|1642|85015|7311|10980|50813|3981	http://amigo.geneontology.org/amigo/term/GO:0006289
hsa-miR-497-5p	GO:2000045	BP	regulation of G1/S transition of mitotic cell cycle	Gene Ontology	7	24	8.59674e-05	0.00100574	5728|6597|11200|5527|7832|134353|4850	http://amigo.geneontology.org/amigo/term/GO:2000045
hsa-miR-497-5p	GO:0051020	MF	GTPase binding	Gene Ontology	13	92	8.89926e-05	0.00103725	7514|55845|4943|6655|10564|378|8925|3842|2674|23365|153020|163486|120892	http://amigo.geneontology.org/amigo/term/GO:0051020
hsa-miR-497-5p	GO:0009605	BP	response to external stimulus	Gene Ontology	30	366	9.19779e-05	0.00106411	661|55509|5469|3064|3673|120892|830|3798|25960|51191|1613|6041|10621|2260|146223|10625|6821|23332|54890|2932|710|2180|128|9647|3643|1432|5599|89122|351|80010	http://amigo.geneontology.org/amigo/term/GO:0009605
hsa-miR-497-5p	GO:0032879	BP	regulation of localization	Gene Ontology	30	366	9.19779e-05	0.00106411	51804|4088|889|65055|57406|26354|153222|23189|154810|6623|4691|9928|5728|7327|4943|140730|1613|5608|2260|585|3156|6934|6717|10015|79753|2040|11252|6334|51763|8645	http://amigo.geneontology.org/amigo/term/GO:0032879
hsa-miR-497-5p	GO:0044403	BP	symbiotic process	Gene Ontology	15	120	9.30605e-05	0.00107398	3921|55294|1642|4088|160|3609|9474|26057|5818|6510|3014|6157|3159|5861|11016	http://amigo.geneontology.org/amigo/term/GO:0044403
hsa-miR-497-5p	GO:0009607	BP	response to biotic stimulus	Gene Ontology	21	214	0.000107035	0.0012247	3916|9261|3716|84522|351|596|1191|5144|51191|6732|9474|5819|55421|6890|4486|1690|9181|103|10695|5608|8357	http://amigo.geneontology.org/amigo/term/GO:0009607
hsa-miR-497-5p	GO:0042221	BP	response to chemical	Gene Ontology	46	676	0.000110722	0.00125766	3716|55854|596|83590|2773|333|5604|5601|153222|6623|1901|5708|55294|9474|9817|161742|8614|6197|10587|1650|2247|8239|2768|9529|3662|3588|3875|5286|10560|8453|1495|5048|5469|27244|3313|3312|55161|10818|3454|5599|5243|4486|2180|51094|51763|3987	http://amigo.geneontology.org/amigo/term/GO:0042221
hsa-miR-497-5p	GO:0032990	BP	cell part morphogenesis	Gene Ontology	14	108	0.00011138	0.00126056	65059|10678|50488|84894|1600|2932|5604|150465|5781|5048|23189|80025|7465|6477	http://amigo.geneontology.org/amigo/term/GO:0032990
hsa-miR-497-5p	GO:0016462	MF	pyrophosphatase activity	Gene Ontology	23	248	0.000112634	0.00127167	6594|9459|10383|3799|60626|957|1857|284439|55154|5862|84515|55605|60558|3070|23255|5048|23195|10788|57171|1107|203547|403|2254	http://amigo.geneontology.org/amigo/term/GO:0016462
hsa-miR-497-5p	GO:0004712	MF	protein serine/threonine/tyrosine kinase activity	Gene Ontology	6	17	0.00011753	0.0013206	1432|3480|2889|5563|1399|10818	http://amigo.geneontology.org/amigo/term/GO:0004712
hsa-miR-497-5p	GO:0045335	CC	phagocytic vesicle	Gene Ontology	5	10	0.000123622	0.00137259	8992|3916|311|10890|1182	http://amigo.geneontology.org/amigo/term/GO:0045335
hsa-miR-497-5p	GO:0010941	BP	regulation of cell death	Gene Ontology	23	250	0.000125664	0.00138704	9459|103|10105|5728|7320|51107|1191|5562|10625|9113|9826|3156|10461|6648|10114|7703|56947|90441|5599|7074|2020|2066|1495	http://amigo.geneontology.org/amigo/term/GO:0010941
hsa-miR-497-5p	GO:0031647	BP	regulation of protein stability	Gene Ontology	9	46	0.000125407	0.00138704	284996|51701|6400|89978|7203|2776|11200|10576|3312	http://amigo.geneontology.org/amigo/term/GO:0031647
hsa-miR-497-5p	GO:0048513	BP	animal organ development	Gene Ontology	37	504	0.00012663	0.00139442	607|595|5573|9618|5604|3145|9612|1896|399979|51107|7074|2820|167153|56603|93185|55742|10818|64919|64750|55273|84522|3643|162|6208|11174|865|5324|3981|9928|5693|83700|688|4953|2254|5814|10959|57217	http://amigo.geneontology.org/amigo/term/GO:0048513
hsa-miR-497-5p	GO:1901137	BP	carbohydrate derivative biosynthetic process	Gene Ontology	13	96	0.000130835	0.00143735	10195|92370|26574|79993|29940|5562|6385|132|4842|160|3643|11227|55750	http://amigo.geneontology.org/amigo/term/GO:1901137
hsa-miR-497-5p	GO:0090407	BP	organophosphate biosynthetic process	Gene Ontology	12	83	0.000135398	0.00147195	8897|56623|79993|85465|5631|57171|518|80025|8904|10423|23545|55750	http://amigo.geneontology.org/amigo/term/GO:0090407
hsa-miR-497-5p	GO:0070647	BP	protein modification by small protein conjugation or removal	Gene Ontology	18	170	0.000137065	0.00148661	892|90025|5708|580|25847|159195|64718|55527|54165|9618|5693|11275|9883|25948|219333|5469|57154|26273	http://amigo.geneontology.org/amigo/term/GO:0070647
hsa-miR-497-5p	GO:2000113	BP	negative regulation of cellular macromolecule biosynthetic process	Gene Ontology	20	203	0.000147097	0.00158807	22980|10971|51804|85235|9126|8507|7091|55929|4335|7311|3516|55509|22849|1831|64061|688|3065|7644|9612|4602	http://amigo.geneontology.org/amigo/term/GO:2000113
hsa-miR-497-5p	GO:0008380	BP	RNA splicing	Gene Ontology	11	71	0.000148214	0.00159645	1859|23524|208|23064|55225|9967|92797|22827|23450|22913|10625	http://amigo.geneontology.org/amigo/term/GO:0008380
hsa-miR-497-5p	GO:0006355	BP	regulation of transcription, DNA-templated	Gene Ontology	40	567	0.000151172	0.00162272	54458|6597|80712|1871|26155|1901|27107|196528|55290|80778|6648|7049|405|7772|2260|23269|83463|58486|3662|55929|3609|4335|2932|5728|79447|7644|91|9987|10114|3643|4791|8357|80034|359948|57763|7586|3200|51058|1107|8939	http://amigo.geneontology.org/amigo/term/GO:0006355
hsa-miR-497-5p	GO:0042803	MF	protein homodimerization activity	Gene Ontology	15	126	0.000152052	0.00162657	6899|51429|2040|5723|4297|1182|5631|1613|5818|8614|54529|6631|56947|84313|2066	http://amigo.geneontology.org/amigo/term/GO:0042803
hsa-miR-497-5p	GO:0043067	BP	regulation of programmed cell death	Gene Ontology	22	237	0.000155156	0.00165036	11200|23365|8406|55294|1191|1613|2247|580|3875|51703|9647|5538|9748|10818|27113|7703|1642|6655|23064|51107|51588|7422	http://amigo.geneontology.org/amigo/term/GO:0043067
hsa-miR-497-5p	GO:0031401	BP	positive regulation of protein modification process	Gene Ontology	19	188	0.000157864	0.00166781	28996|51776|54778|1026|51429|142679|754|1191|11261|64762|1857|25836|91|2180|4842|9181|6899|2066|57826	http://amigo.geneontology.org/amigo/term/GO:0031401
hsa-miR-497-5p	GO:0035265	BP	organ growth	Gene Ontology	7	27	0.00016029	0.00168963	7337|5573|3516|5324|5781|2254|1901	http://amigo.geneontology.org/amigo/term/GO:0035265
hsa-miR-497-5p	GO:0042127	BP	regulation of cell population proliferation	Gene Ontology	23	255	0.000164272	0.00172384	3716|595|10290|5527|6899|259266|1191|342371|2260|2247|64919|3667|4883|6934|120892|8793|7049|143384|130399|131870|9921|5813|2066	http://amigo.geneontology.org/amigo/term/GO:0042127
hsa-miR-497-5p	GO:0005874	CC	microtubule	Gene Ontology	11	72	0.000165449	0.00172532	4082|51199|79659|7074|908|3800|55605|203068|10383|10564|403	http://amigo.geneontology.org/amigo/term/GO:0005874
hsa-miR-497-5p	GO:0043005	CC	neuron projection	Gene Ontology	18	173	0.000167294	0.00173612	57728|6780|57154|22849|3831|55201|3742|4218|3799|80331|403|1759|84548|3673|11315|5538|64919|23710	http://amigo.geneontology.org/amigo/term/GO:0043005
hsa-miR-497-5p	GO:0044265	BP	cellular macromolecule catabolic process	Gene Ontology	18	173	0.000167294	0.00173612	127933|6400|8945|9529|8507|11200|1191|8239|9817|7311|55802|23014|51449|6157|1432|51444|10015|1660	http://amigo.geneontology.org/amigo/term/GO:0044265
hsa-miR-497-5p	GO:0009890	BP	negative regulation of biosynthetic process	Gene Ontology	22	239	0.000173151	0.00179094	51804|4087|23512|11200|28996|3658|5494|60468|342371|545|6208|83463|58487|8335|160|85235|6299|94103|51588|25836|3980|8545	http://amigo.geneontology.org/amigo/term/GO:0009890
hsa-miR-497-5p	GO:0048609	BP	multicellular organismal reproductive process	Gene Ontology	16	143	0.000178476	0.00184196	5728|596|898|83700|5048|6477|54851|5819|56603|351|153222|23424|5469|268|23633|3301	http://amigo.geneontology.org/amigo/term/GO:0048609
hsa-miR-497-5p	GO:0003677	MF	DNA binding	Gene Ontology	31	401	0.000187812	0.00193193	84444|9757|6929|136319|109504726|23269|196528|80119|405|55766|545|367|81620|25942|10152|8330|9219|9586|6934|5469|103|2071|4152|56941|6651|51588|2020|23063|5813|5814|29068	http://amigo.geneontology.org/amigo/term/GO:0003677
hsa-miR-497-5p	GO:0044262	BP	cellular carbohydrate metabolic process	Gene Ontology	8	38	0.000191356	0.00195977	3643|8867|5165|64768|56623|8445|51763|2820	http://amigo.geneontology.org/amigo/term/GO:0044262
hsa-miR-497-5p	GO:0010646	BP	regulation of cell communication	Gene Ontology	35	478	0.000198964	0.00202883	595|26155|84444|11315|10105|5499|3065|5494|6623|8406|5728|3799|55294|51246|7074|8131|1111|81029|367|81848|4214|9063|3749|4335|2932|4218|9826|10116|10114|51701|4170|27250|7422|25769|2254	http://amigo.geneontology.org/amigo/term/GO:0010646
hsa-miR-497-5p	GO:0055086	BP	nucleobase-containing small molecule metabolic process	Gene Ontology	12	87	0.000201182	0.00204477	56894|8050|5165|5166|55526|79993|5631|498|3156|112|129607|5538	http://amigo.geneontology.org/amigo/term/GO:0055086
hsa-miR-497-5p	GO:0001932	BP	regulation of protein phosphorylation	Gene Ontology	19	192	0.000202224	0.00205091	284996|28996|1026|142679|9134|351|63967|10645|7311|10818|81848|6385|11200|143384|7128|22881|10114|80851|2260	http://amigo.geneontology.org/amigo/term/GO:0001932
hsa-miR-497-5p	GO:0048699	BP	generation of neurons	Gene Ontology	22	242	0.000203601	0.00205597	4082|8239|1613|6385|5604|51517|23189|10890|3516|2260|23294|585|998|136319|120892|6095|3320|6299|1600|4134|23064|7465	http://amigo.geneontology.org/amigo/term/GO:0048699
hsa-miR-497-5p	GO:0051240	BP	positive regulation of multicellular organismal process	Gene Ontology	22	242	0.000203601	0.00205597	3716|9474|3659|60682|1545|3516|405|2260|2247|1654|6584|8772|55273|3156|91|4791|1432|7468|6239|7182|3981|50937	http://amigo.geneontology.org/amigo/term/GO:0051240
hsa-miR-497-5p	GO:0042277	MF	peptide binding	Gene Ontology	8	39	0.000223502	0.00223287	11014|3480|4883|51752|9577|10105|3643|23633	http://amigo.geneontology.org/amigo/term/GO:0042277
hsa-miR-497-5p	GO:0051276	BP	chromosome organization	Gene Ontology	18	178	0.000230734	0.00229534	23332|7320|55294|9126|4297|23063|23523|8330|64061|79960|80119|84193|9474|8450|85235|3159|23279|1654	http://amigo.geneontology.org/amigo/term/GO:0051276
hsa-miR-497-5p	GO:0006325	BP	chromatin organization	Gene Ontology	14	117	0.000237607	0.00234381	10196|23523|6594|4297|4673|9474|8331|6603|84193|8335|64061|3720|4842|7468	http://amigo.geneontology.org/amigo/term/GO:0006325
hsa-miR-497-5p	GO:0007005	BP	mitochondrion organization	Gene Ontology	14	117	0.000237607	0.00234381	10971|4705|27113|55294|26515|10087|5601|2066|29928|10105|7182|1386|23192|9927	http://amigo.geneontology.org/amigo/term/GO:0007005
hsa-miR-497-5p	GO:0043547	BP	positive regulation of GTPase activity	Gene Ontology	14	117	0.000237607	0.00234381	10260|3667|3716|2665|2889|2776|1857|378|8490|9181|9681|26286|120892|10788	http://amigo.geneontology.org/amigo/term/GO:0043547
hsa-miR-497-5p	GO:0006914	BP	autophagy	Gene Ontology	12	89	0.000243195	0.00238887	27|8992|5861|53349|3320|5604|7182|3312|22878|11315|23545|8357	http://amigo.geneontology.org/amigo/term/GO:0006914
hsa-miR-497-5p	GO:0006406	BP	mRNA export from nucleus	Gene Ontology	6	20	0.000244733	0.00239144	84271|23511|9883|3267|55308|8021	http://amigo.geneontology.org/amigo/term/GO:0006406
hsa-miR-497-5p	GO:0002224	BP	toll-like receptor signaling pathway	Gene Ontology	6	20	0.000244733	0.00239144	10318|4214|9261|3662|7311|7128	http://amigo.geneontology.org/amigo/term/GO:0002224
hsa-miR-497-5p	GO:0017111	MF	nucleoside-triphosphatase activity	Gene Ontology	20	212	0.000249235	0.00242784	9927|3312|84340|998|10139|5189|3667|10730|1857|25782|203068|3987|92797|5922|9181|3268|2071|84705|8131|26130	http://amigo.geneontology.org/amigo/term/GO:0017111
hsa-miR-497-5p	GO:0031400	BP	negative regulation of protein modification process	Gene Ontology	11	76	0.000252411	0.00245113	10196|284996|5728|7320|9529|55243|161742|51347|6879|10114|3720	http://amigo.geneontology.org/amigo/term/GO:0031400
hsa-miR-497-5p	GO:0002376	BP	immune system process	Gene Ontology	31	410	0.000268874	0.00259487	130340|1147|4088|55526|55324|60|28996|10383|6041|977|5728|27|1191|51191|1778|405|55008|8905|64919|1654|4214|4090|1173|3831|3609|55824|9474|8357|29126|7468|7422	http://amigo.geneontology.org/amigo/term/GO:0002376
hsa-miR-497-5p	GO:0071310	BP	cellular response to organic substance	Gene Ontology	29	373	0.000272703	0.00262577	2889|55854|5471|2774|2776|7049|3145|112|8031|1896|3313|27|3454|10979|9817|161742|2030|367|10818|3662|5144|7128|103|120892|8471|5575|4486|7422|23189	http://amigo.geneontology.org/amigo/term/GO:0071310
hsa-miR-497-5p	GO:0016049	BP	cell growth	Gene Ontology	11	77	0.000279352	0.00268208	1026|84258|6597|4088|6520|1457|64061|7422|54437|8904|7049	http://amigo.geneontology.org/amigo/term/GO:0016049
hsa-miR-497-5p	GO:0035556	BP	intracellular signal transduction	Gene Ontology	32	430	0.000280527	0.00268521	1147|9367|5604|23228|3065|10105|376267|1859|26155|51246|5494|83593|8904|2260|5862|5144|10139|55788|10461|5469|23370|4791|51701|142679|27032|6655|6197|192670|7182|192669|80010|9927	http://amigo.geneontology.org/amigo/term/GO:0035556
hsa-miR-497-5p	GO:0045595	BP	regulation of cell differentiation	Gene Ontology	22	249	0.000293657	0.00279945	4082|10413|6383|23512|653464|51517|6899|8867|5728|27|2889|2247|4842|23332|56623|2932|55273|120892|4602|2551|8994|688	http://amigo.geneontology.org/amigo/term/GO:0045595
hsa-miR-497-5p	GO:0044843	BP	cell cycle G1/S phase transition	Gene Ontology	8	41	0.000301097	0.00286165	143384|55294|898|134353|9928|8454|5537|26057	http://amigo.geneontology.org/amigo/term/GO:0044843
hsa-miR-497-5p	GO:0019001	MF	guanyl nucleotide binding	Gene Ontology	10	65	0.000308506	0.00291726	51715|1968|9258|2773|55341|10139|51209|400|403|5862	http://amigo.geneontology.org/amigo/term/GO:0019001
hsa-miR-497-5p	GO:1902532	BP	negative regulation of intracellular signal transduction	Gene Ontology	10	65	0.000308506	0.00291726	10131|143686|3708|55788|3156|5922|9181|10625|1654|286205	http://amigo.geneontology.org/amigo/term/GO:1902532
hsa-miR-497-5p	GO:0023052	BP	signaling	Gene Ontology	59	984	0.000325357	0.00306424	6856|6597|5048|84444|6452|9908|6717|9529|27|6648|60626|957|6814|2982|2889|1613|51719|898|80331|2665|51209|23112|767|4842|1173|1399|51283|51701|57531|8395|285282|259295|5286|441478|3708|56896|55788|6934|10564|10116|103|9647|3312|23370|4644|9867|4139|6400|4735|84258|1600|4296|8994|51107|56122|51763|285704|1741|291	http://amigo.geneontology.org/amigo/term/GO:0023052
hsa-miR-497-5p	GO:0033993	BP	response to lipid	Gene Ontology	15	137	0.000346667	0.0032389	4691|8867|595|5166|79447|5563|81029|8611|1432|153222|5469|367|490|4842|3145	http://amigo.geneontology.org/amigo/term/GO:0033993
hsa-miR-497-5p	GO:1903561	CC	extracellular vesicle	Gene Ontology	36	514	0.000357448	0.00331122	4329|9261|2774|124583|3320|55832|4644|550|376267|11269|11080|1968|3643|11261|754|6558|203068|2745|1399|6584|2936|3875|4218|8331|11315|23478|9748|9980|51715|6426|2040|8895|7317|5243|5819|80347	http://amigo.geneontology.org/amigo/term/GO:1903561
hsa-miR-497-5p	GO:1902680	BP	positive regulation of RNA biosynthetic process	Gene Ontology	20	219	0.000367218	0.00339034	28996|2551|9063|51804|1432|8092|10521|6597|55617|10645|1857|405|9219|6929|688|10691|10413|221937|6874|1901	http://amigo.geneontology.org/amigo/term/GO:1902680
hsa-miR-497-5p	GO:0033365	BP	protein localization to organelle	Gene Ontology	13	108	0.000371788	0.00342078	7514|1434|5830|596|5599|5189|79576|378|10762|26108|54469|84313|57154	http://amigo.geneontology.org/amigo/term/GO:0033365
hsa-miR-497-5p	GO:0006413	BP	translational initiation	Gene Ontology	7	32	0.000392774	0.00359793	3921|1964|90381|5499|6157|6208|51441	http://amigo.geneontology.org/amigo/term/GO:0006413
hsa-miR-497-5p	GO:0045892	BP	negative regulation of transcription, DNA-templated	Gene Ontology	18	187	0.000398784	0.00364422	2551|26155|59336|7320|6597|55929|23512|4087|7832|5469|6929|51763|3312|5494|22893|221937|25942|3159	http://amigo.geneontology.org/amigo/term/GO:0045892
hsa-miR-497-5p	GO:0050778	BP	positive regulation of immune response	Gene Ontology	13	109	0.000402846	0.00366512	5728|3600|1147|596|5144|7311|55845|998|60|55824|23228|1690|10621	http://amigo.geneontology.org/amigo/term/GO:0050778
hsa-miR-497-5p	GO:0003700	MF	DNA-binding transcription factor activity	Gene Ontology	20	221	0.000408811	0.00370165	9204|58486|58487|4087|1191|23528|7586|9817|60468|1871|405|9219|6239|26574|6879|153222|6877|253461|109504726|4799	http://amigo.geneontology.org/amigo/term/GO:0003700
hsa-miR-497-5p	GO:0071702	BP	organic substance transport	Gene Ontology	31	421	0.000409232	0.00370165	26297|10526|3800|79576|3320|1173|23225|11269|11261|10628|55705|10762|5781|2030|3301|4842|26130|55374|8435|1133|998|3708|2180|5538|3643|23545|163|29126|6426|1432|372	http://amigo.geneontology.org/amigo/term/GO:0071702
hsa-miR-497-5p	GO:0048636	BP	positive regulation of muscle organ development	Gene Ontology	4	7	0.00042388	0.0038194	2260|2254|3156|50937	http://amigo.geneontology.org/amigo/term/GO:0048636
hsa-miR-497-5p	GO:0034446	BP	substrate adhesion-dependent cell spreading	Gene Ontology	5	14	0.000425301	0.00382044	6239|23189|3987|5861|10461	http://amigo.geneontology.org/amigo/term/GO:0034446
hsa-miR-497-5p	GO:1901698	BP	response to nitrogen compound	Gene Ontology	16	156	0.00043512	0.00389447	595|8992|3643|5575|2932|7832|130399|5872|4644|1495|5471|3164|155066|8471|83590|3145	http://amigo.geneontology.org/amigo/term/GO:1901698
hsa-miR-497-5p	GO:0048511	BP	rhythmic process	Gene Ontology	8	44	0.000457488	0.00406101	1859|9612|1191|2776|3065|79365|8945|6095	http://amigo.geneontology.org/amigo/term/GO:0048511
hsa-miR-497-5p	GO:0098852	CC	lytic vacuole membrane	Gene Ontology	8	44	0.000457488	0.00406101	53373|220002|1173|7311|55207|8763|3312|90809	http://amigo.geneontology.org/amigo/term/GO:0098852
hsa-miR-497-5p	GO:0031256	CC	leading edge membrane	Gene Ontology	6	23	0.000461106	0.00408028	490|11252|3320|51763|81848|25800	http://amigo.geneontology.org/amigo/term/GO:0031256
hsa-miR-497-5p	GO:0016021	CC	integral component of membrane	Gene Ontology	53	871	0.000464686	0.00410421	1147|4363|8509|25897|55321|3755|124583|3600|7871|1896|490|10857|11118|51246|171586|92014|6184|284439|10166|55238|51094|1650|92979|146223|4842|79845|1138|351|2030|113444|259295|55273|84826|219699|9213|26507|84109|10818|2040|84258|259230|10099|403313|81619|56889|57171|9413|55890|201799|84548|10490|57153|57622	http://amigo.geneontology.org/amigo/term/GO:0016021
hsa-miR-497-5p	GO:0000323	CC	lytic vacuole	Gene Ontology	11	83	0.000497087	0.00435753	3916|92979|5862|2773|7311|9681|8763|8674|8905|5538|10490	http://amigo.geneontology.org/amigo/term/GO:0000323
hsa-miR-497-5p	GO:0000977	MF	RNA polymerase II regulatory region sequence-specific DNA binding	Gene Ontology	11	83	0.000497087	0.00435753	27107|2551|51804|3516|60|5324|6239|688|64919|4791|3659	http://amigo.geneontology.org/amigo/term/GO:0000977
hsa-miR-497-5p	GO:0002831	BP	regulation of response to biotic stimulus	Gene Ontology	11	83	0.000497087	0.00435753	3916|7335|3600|2040|3454|6890|8772|5693|3659|51135|10695	http://amigo.geneontology.org/amigo/term/GO:0002831
hsa-miR-497-5p	GO:1901700	BP	response to oxygen-containing compound	Gene Ontology	23	278	0.000510513	0.00446687	595|10670|143686|9612|3164|8867|3643|8614|81029|523|55929|3600|5165|5166|898|2850|5286|3156|120892|6095|5575|51763|415116	http://amigo.geneontology.org/amigo/term/GO:1901700
hsa-miR-497-5p	GO:0016236	BP	macroautophagy	Gene Ontology	10	70	0.00052258	0.00452597	5166|4943|5599|5565|23001|64768|9783|523|9140|9469	http://amigo.geneontology.org/amigo/term/GO:0016236
hsa-miR-497-5p	GO:0006417	BP	regulation of translation	Gene Ontology	8	45	0.000522263	0.00452597	22849|1964|6197|3658|9567|8664|6208|51441	http://amigo.geneontology.org/amigo/term/GO:0006417
hsa-miR-497-5p	GO:1902679	BP	negative regulation of RNA biosynthetic process	Gene Ontology	18	192	0.000531658	0.00458763	8945|23466|85235|9612|153222|84444|10628|22849|64207|6929|3659|2005|84733|10413|221937|5814|100529215|9044	http://amigo.geneontology.org/amigo/term/GO:1902679
hsa-miR-497-5p	GO:1901575	BP	organic substance catabolic process	Gene Ontology	24	297	0.0005332	0.00459248	3920|7812|139285|219333|550|3320|178|7267|167153|51752|9958|3667|23607|5144|55802|7126|23259|9045|255967|51429|10845|1642|1975|9928	http://amigo.geneontology.org/amigo/term/GO:1901575
hsa-miR-497-5p	GO:0045017	BP	glycerolipid biosynthetic process	Gene Ontology	7	34	0.000539821	0.00463248	5728|8895|5781|2260|2254|171586|51763	http://amigo.geneontology.org/amigo/term/GO:0045017
hsa-miR-497-5p	GO:0034504	BP	protein localization to nucleus	Gene Ontology	7	34	0.000539821	0.00463248	55374|1434|51804|10526|23511|11261|55705	http://amigo.geneontology.org/amigo/term/GO:0034504
hsa-miR-497-5p	GO:0045786	BP	negative regulation of cell cycle	Gene Ontology	11	84	0.000544451	0.00466366	11180|55294|27250|84101|5728|1111|8453|3659|5527|10116|5781	http://amigo.geneontology.org/amigo/term/GO:0045786
hsa-miR-497-5p	GO:0031398	BP	positive regulation of protein ubiquitination	Gene Ontology	5	15	0.000550589	0.00469052	120892|9810|83932|55294|5728	http://amigo.geneontology.org/amigo/term/GO:0031398
hsa-miR-497-5p	GO:0043604	BP	amide biosynthetic process	Gene Ontology	13	113	0.000550062	0.00469052	10318|5166|89978|283459|8439|55186|54998|123283|8664|79094|6609|5813|92715	http://amigo.geneontology.org/amigo/term/GO:0043604
hsa-miR-497-5p	GO:1904029	BP	regulation of cyclin-dependent protein kinase activity	Gene Ontology	5	15	0.000550589	0.00469052	898|51191|892|894|7128	http://amigo.geneontology.org/amigo/term/GO:1904029
hsa-miR-497-5p	GO:0090175	BP	regulation of establishment of planar polarity	Gene Ontology	6	24	0.00055922	0.00475109	5708|7074|64750|57154|160|163	http://amigo.geneontology.org/amigo/term/GO:0090175
hsa-miR-497-5p	GO:0005925	CC	focal adhesion	Gene Ontology	9	58	0.000577121	0.00486683	10971|23332|8895|4739|11252|6385|2665|23385|1495	http://amigo.geneontology.org/amigo/term/GO:0005925
hsa-miR-497-5p	GO:0006091	BP	generation of precursor metabolites and energy	Gene Ontology	10	71	0.000577517	0.00486683	55847|1738|51763|4720|9377|5499|518|1355|178|291	http://amigo.geneontology.org/amigo/term/GO:0006091
hsa-miR-497-5p	GO:0022613	BP	ribonucleoprotein complex biogenesis	Gene Ontology	10	71	0.000577517	0.00486683	4691|65008|115752|7311|23076|90381|23064|6157|6208|54913	http://amigo.geneontology.org/amigo/term/GO:0022613
hsa-miR-497-5p	GO:0006887	BP	exocytosis	Gene Ontology	9	58	0.000577121	0.00486683	23332|140730|9367|11261|54495|710|26258|11336|10490	http://amigo.geneontology.org/amigo/term/GO:0006887
hsa-miR-497-5p	GO:0043085	BP	positive regulation of catalytic activity	Gene Ontology	20	228	0.000588356	0.00494483	27113|2180|9459|55294|10845|201627|5573|653464|54828|4486|9628|3987|26130|9618|400|163486|80829|1901|23370|142679	http://amigo.geneontology.org/amigo/term/GO:0043085
hsa-miR-497-5p	GO:0046983	MF	protein dimerization activity	Gene Ontology	18	194	0.000594624	0.00498856	84313|8092|11200|4297|6655|4296|1613|653464|25769|1386|7422|1759|6631|8904|7182|253461|10247|8357	http://amigo.geneontology.org/amigo/term/GO:0046983
hsa-miR-497-5p	GO:0031397	BP	negative regulation of protein ubiquitination	Gene Ontology	4	8	0.000618002	0.0051708	10196|9683|7128|3301	http://amigo.geneontology.org/amigo/term/GO:0031397
hsa-miR-497-5p	GO:0009653	BP	anatomical structure morphogenesis	Gene Ontology	28	375	0.000621836	0.0051936	10678|4891|3800|3516|1875|6903|1896|54583|5708|3798|122786|5316|1399|2247|6303|51804|4090|351|55273|161176|57082|23259|10818|5819|7468|6239|4842|54828	http://amigo.geneontology.org/amigo/term/GO:0009653
hsa-miR-497-5p	GO:0001067	MF	regulatory region nucleic acid binding	Gene Ontology	14	130	0.000625635	0.00521604	2551|51804|9612|57649|6597|23528|51058|4603|688|6877|5813|25942|3720|4791	http://amigo.geneontology.org/amigo/term/GO:0001067
hsa-miR-497-5p	GO:0046777	BP	protein autophosphorylation	Gene Ontology	7	35	0.000628162	0.00521854	51701|27|3480|4296|11200|545|9748	http://amigo.geneontology.org/amigo/term/GO:0046777
hsa-miR-497-5p	GO:0009260	BP	ribonucleotide biosynthetic process	Gene Ontology	7	35	0.000628162	0.00521854	1738|5165|53354|2982|10165|5631|226	http://amigo.geneontology.org/amigo/term/GO:0009260
hsa-miR-497-5p	GO:0032970	BP	regulation of actin filament-based process	Gene Ontology	8	47	0.000674069	0.00555559	23607|585|10095|9113|6385|83700|9647|23189	http://amigo.geneontology.org/amigo/term/GO:0032970
hsa-miR-497-5p	GO:0034330	BP	cell junction organization	Gene Ontology	8	47	0.000674069	0.00555559	5872|5728|596|1613|60|204851|3673|9647	http://amigo.geneontology.org/amigo/term/GO:0034330
hsa-miR-497-5p	GO:0046872	MF	metal ion binding	Gene Ontology	42	657	0.000707422	0.00577965	10322|311|767|9618|222236|64207|3716|9181|23087|2776|5099|27|51199|6095|5562|285268|5903|51776|403|3998|23060|100529215|253461|57798|2768|10645|6670|3267|3268|11315|57089|80174|51701|22869|1026|388630|7703|114034|3420|1362|351|3981	http://amigo.geneontology.org/amigo/term/GO:0046872
hsa-miR-497-5p	GO:0004842	MF	ubiquitin-protein transferase activity	Gene Ontology	11	87	0.000709683	0.00578803	79845|892|8945|9529|54467|7317|51191|60468|25948|11315|6477	http://amigo.geneontology.org/amigo/term/GO:0004842
hsa-miR-497-5p	GO:0005085	MF	guanyl-nucleotide exchange factor activity	Gene Ontology	8	48	0.000762287	0.00618475	10260|57589|10818|9459|4254|26130|2260|2254	http://amigo.geneontology.org/amigo/term/GO:0005085
hsa-miR-497-5p	GO:0045787	BP	positive regulation of cell cycle	Gene Ontology	9	61	0.000798622	0.00645162	892|595|2342|5048|5469|8450|9700|7832|4850	http://amigo.geneontology.org/amigo/term/GO:0045787
hsa-miR-497-5p	GO:0030666	CC	endocytic vesicle membrane	Gene Ontology	6	26	0.000803443	0.00645717	130340|9367|9474|8905|9140|23545	http://amigo.geneontology.org/amigo/term/GO:0030666
hsa-miR-497-5p	GO:0031975	CC	envelope	Gene Ontology	17	183	0.000822377	0.0065886	10166|10845|51246|23511|9512|65055|518|286205|7514|1355|255488|29928|3164|9927|128308|4842|55750	http://amigo.geneontology.org/amigo/term/GO:0031975
hsa-miR-497-5p	GO:0098662	BP	inorganic cation transmembrane transport	Gene Ontology	15	150	0.000822609	0.0065886	53373|27113|23516|4891|3755|1355|4644|2745|51719|27092|498|11315|84102|23545|27173	http://amigo.geneontology.org/amigo/term/GO:0098662
hsa-miR-497-5p	GO:0031399	BP	regulation of protein modification process	Gene Ontology	20	235	0.000832459	0.00665612	10818|9261|2889|1432|9529|55243|27250|2339|5575|4296|23523|54165|5601|6879|2254|10116|6609|9647|2247|50937	http://amigo.geneontology.org/amigo/term/GO:0031399
hsa-miR-497-5p	GO:0015931	BP	nucleobase-containing compound transport	Gene Ontology	7	37	0.000839062	0.00668042	3921|55706|7514|9883|54890|55308|11338	http://amigo.geneontology.org/amigo/term/GO:0015931
hsa-miR-497-5p	GO:0006367	BP	transcription initiation from RNA polymerase II promoter	Gene Ontology	7	37	0.000839062	0.00668042	2965|10413|29959|3516|1871|3164|7182	http://amigo.geneontology.org/amigo/term/GO:0006367
hsa-miR-497-5p	GO:0006629	BP	lipid metabolic process	Gene Ontology	19	218	0.000854924	0.00677511	5515|51360|51703|51170|8897|8395|8895|85465|36|1133|2820|2180|498|23175|5469|8611|25942|64919|90809	http://amigo.geneontology.org/amigo/term/GO:0006629
hsa-miR-497-5p	GO:0015630	CC	microtubule cytoskeleton	Gene Ontology	16	167	0.000855293	0.00677511	259266|8867|585|51256|79659|2773|11215|10198|9639|4739|55207|5048|9181|9700|54913|1660	http://amigo.geneontology.org/amigo/term/GO:0015630
hsa-miR-497-5p	GO:0019220	BP	regulation of phosphate metabolic process	Gene Ontology	21	254	0.000881265	0.00694906	63967|51429|7320|57826|55294|54956|5575|51191|957|219771|91|6609|7422|367|10105|50488|10114|2254|5515|81848|3301	http://amigo.geneontology.org/amigo/term/GO:0019220
hsa-miR-497-5p	GO:0000904	BP	cell morphogenesis involved in differentiation	Gene Ontology	11	90	0.00091458	0.0071863	4082|3798|8239|10890|122786|65059|219699|7422|10461|55742|80031	http://amigo.geneontology.org/amigo/term/GO:0000904
hsa-miR-497-5p	GO:0043207	BP	response to external biotic stimulus	Gene Ontology	18	202	0.000914871	0.0071863	10318|4214|1432|7128|5166|5819|2982|5144|3516|55324|5648|84522|51135|10379|128|129607|51752|26057	http://amigo.geneontology.org/amigo/term/GO:0043207
hsa-miR-497-5p	GO:0044085	BP	cellular component biogenesis	Gene Ontology	29	405	0.000927523	0.00727349	51804|3320|8349|90381|9140|8867|5728|51719|51599|6041|1759|54919|55742|55845|9529|8772|26155|3070|51504|57082|11315|9045|5830|94103|4739|22843|26168|54828|9927	http://amigo.geneontology.org/amigo/term/GO:0044085
hsa-miR-497-5p	GO:0019900	MF	kinase binding	Gene Ontology	12	105	0.000933333	0.00730072	10318|4214|3667|595|142679|2339|5575|51719|54956|1386|8895|162	http://amigo.geneontology.org/amigo/term/GO:0019900
hsa-miR-497-5p	GO:0009790	BP	embryo development	Gene Ontology	14	136	0.000936487	0.00731318	7320|204851|6299|4088|2776|1857|441478|405|2020|79191|103|25942|10370|51493	http://amigo.geneontology.org/amigo/term/GO:0009790
hsa-miR-497-5p	GO:0061572	BP	actin filament bundle organization	Gene Ontology	6	27	0.000952811	0.00740978	585|4739|51763|9647|7840|1901	http://amigo.geneontology.org/amigo/term/GO:0061572
hsa-miR-497-5p	GO:1903362	BP	regulation of cellular protein catabolic process	Gene Ontology	6	27	0.000952811	0.00740978	2768|54467|9817|64326|255488|9683	http://amigo.geneontology.org/amigo/term/GO:1903362
hsa-miR-497-5p	GO:0000790	CC	nuclear chromatin	Gene Ontology	8	50	0.00096652	0.00746067	6594|6597|1857|8349|84193|6929|8335|55766	http://amigo.geneontology.org/amigo/term/GO:0000790
hsa-miR-497-5p	GO:0006913	BP	nucleocytoplasmic transport	Gene Ontology	8	50	0.00096652	0.00746067	3921|23511|55308|54890|5494|103|84271|23225	http://amigo.geneontology.org/amigo/term/GO:0006913
hsa-miR-497-5p	GO:0007254	BP	JNK cascade	Gene Ontology	7	38	0.00096358	0.00746067	142679|7074|4296|998|9618|51347|22881	http://amigo.geneontology.org/amigo/term/GO:0007254
hsa-miR-497-5p	GO:0098796	CC	membrane protein complex	Gene Ontology	17	186	0.000970112	0.00747608	53354|3920|1138|1173|596|2773|6645|4891|9527|91689|4720|58477|3749|11276|1759|84313|162	http://amigo.geneontology.org/amigo/term/GO:0098796
hsa-miR-497-5p	GO:0045859	BP	regulation of protein kinase activity	Gene Ontology	13	121	0.000983221	0.00755226	5728|1026|894|57826|5565|10645|51347|351|1432|51429|103|7128|3301	http://amigo.geneontology.org/amigo/term/GO:0045859
hsa-miR-497-5p	GO:0040008	BP	regulation of growth	Gene Ontology	11	91	0.000992876	0.00760151	57154|4088|8879|4739|998|8804|8614|1457|2247|5515|1654	http://amigo.geneontology.org/amigo/term/GO:0040008
hsa-miR-497-5p	GO:0051270	BP	regulation of cellular component movement	Gene Ontology	13	122	0.00105338	0.00801884	114803|3480|5144|64750|4254|1613|1545|91|6717|9647|154810|10370|1901	http://amigo.geneontology.org/amigo/term/GO:0051270
hsa-miR-497-5p	GO:0005783	CC	endoplasmic reticulum	Gene Ontology	17	188	0.00108067	0.00818485	51703|7327|51283|94103|10890|23585|65055|8614|6732|23382|8813|9697|1650|2531|7841|7317|23193	http://amigo.geneontology.org/amigo/term/GO:0005783
hsa-miR-497-5p	GO:0048638	BP	regulation of developmental growth	Gene Ontology	8	51	0.00108388	0.00818485	10413|351|84258|150465|54437|2247|3643|2066	http://amigo.geneontology.org/amigo/term/GO:0048638
hsa-miR-497-5p	GO:0051246	BP	regulation of protein metabolic process	Gene Ontology	28	390	0.00108392	0.00818485	154214|10270|139285|55527|9474|64326|5604|6609|7832|7327|56893|1111|27303|9567|92715|10318|54778|10131|3609|54998|23450|51444|5515|5813|22849|80174|116496|57154	http://amigo.geneontology.org/amigo/term/GO:0051246
hsa-miR-497-5p	GO:0051253	BP	negative regulation of RNA metabolic process	Gene Ontology	17	188	0.00108067	0.00818485	4335|59336|9967|64750|26155|79576|1831|10921|8331|6239|22893|5469|11338|9647|3987|23152|2117	http://amigo.geneontology.org/amigo/term/GO:0051253
hsa-miR-497-5p	GO:0048475	CC	coated membrane	Gene Ontology	5	18	0.00109397	0.00819473	8905|163|162|91056|25977	http://amigo.geneontology.org/amigo/term/GO:0048475
hsa-miR-497-5p	GO:0071456	BP	cellular response to hypoxia	Gene Ontology	5	18	0.00109397	0.00819473	2030|405|27113|7422|5728	http://amigo.geneontology.org/amigo/term/GO:0071456
hsa-miR-497-5p	GO:0016922	MF	nuclear receptor binding	Gene Ontology	5	18	0.00109397	0.00819473	3159|9612|11315|79447|6597	http://amigo.geneontology.org/amigo/term/GO:0016922
hsa-miR-497-5p	GO:0048010	BP	vascular endothelial growth factor receptor signaling pathway	Gene Ontology	5	18	0.00109397	0.00819473	60|405|2254|1432|7422	http://amigo.geneontology.org/amigo/term/GO:0048010
hsa-miR-497-5p	GO:0140098	MF	catalytic activity, acting on RNA	Gene Ontology	7	39	0.00110218	0.0082365	4677|115752|4141|112487|10621|3735|10247	http://amigo.geneontology.org/amigo/term/GO:0140098
hsa-miR-497-5p	GO:0050796	BP	regulation of insulin secretion	Gene Ontology	6	28	0.00112264	0.00834939	7074|2850|130399|3708|415116|4842	http://amigo.geneontology.org/amigo/term/GO:0050796
hsa-miR-497-5p	GO:0006383	BP	transcription by RNA polymerase III	Gene Ontology	4	10	0.0011808	0.00872656	6738|367|2976|661	http://amigo.geneontology.org/amigo/term/GO:0006383
hsa-miR-497-5p	GO:0030641	BP	regulation of cellular pH	Gene Ontology	4	10	0.0011808	0.00872656	120892|155066|11261|596	http://amigo.geneontology.org/amigo/term/GO:0030641
hsa-miR-497-5p	GO:0019901	MF	protein kinase binding	Gene Ontology	11	94	0.00126162	0.00927995	9928|5728|143384|1994|5565|51400|2932|161742|8493|51444|9867	http://amigo.geneontology.org/amigo/term/GO:0019901
hsa-miR-497-5p	GO:0032869	BP	cellular response to insulin stimulus	Gene Ontology	6	29	0.00131471	0.0096402	208|51763|5471|23189|155066|8471	http://amigo.geneontology.org/amigo/term/GO:0032869
hsa-miR-497-5p	GO:0071426	BP	ribonucleoprotein complex export from nucleus	Gene Ontology	5	19	0.00134185	0.00979323	55308|11338|6426|11269|10921	http://amigo.geneontology.org/amigo/term/GO:0071426
hsa-miR-497-5p	GO:0006650	BP	glycerophospholipid metabolic process	Gene Ontology	8	53	0.00135264	0.00983204	5728|55500|5283|5286|8813|5781|10423|2066	http://amigo.geneontology.org/amigo/term/GO:0006650
hsa-miR-497-5p	GO:0030522	BP	intracellular receptor signaling pathway	Gene Ontology	8	53	0.00135264	0.00983204	7337|1147|10521|898|6899|3164|26057|5165	http://amigo.geneontology.org/amigo/term/GO:0030522
hsa-miR-497-5p	GO:2000026	BP	regulation of multicellular organismal development	Gene Ontology	22	282	0.00135347	0.00983204	51804|4087|9181|8323|8867|1545|5708|8092|5376|7468|23332|10521|8202|2932|5515|163|7374|25836|54437|22881|9921|50937	http://amigo.geneontology.org/amigo/term/GO:2000026
hsa-miR-497-5p	GO:0043281	BP	regulation of cysteine-type endopeptidase activity involved in apoptotic process	Gene Ontology	7	41	0.00142601	0.010319	27113|8772|130399|6197|5601|7422|11315	http://amigo.geneontology.org/amigo/term/GO:0043281
hsa-miR-497-5p	GO:0034762	BP	regulation of transmembrane transport	Gene Ontology	10	81	0.00143854	0.0103617	3667|596|3742|9474|5903|55788|4644|23279|4842|23225	http://amigo.geneontology.org/amigo/term/GO:0034762
hsa-miR-497-5p	GO:0044270	BP	cellular nitrogen compound catabolic process	Gene Ontology	10	81	0.00143854	0.0103617	4329|127933|7812|51166|1975|51013|7374|8761|3312|51441	http://amigo.geneontology.org/amigo/term/GO:0044270
hsa-miR-497-5p	GO:0002790	BP	peptide secretion	Gene Ontology	10	81	0.00143854	0.0103617	4087|6814|415116|4218|130399|6934|6717|55585|399979|6623	http://amigo.geneontology.org/amigo/term/GO:0002790
hsa-miR-497-5p	GO:0005525	MF	GTP binding	Gene Ontology	9	67	0.00144872	0.010403	9367|60558|9567|998|378|84340|400|84705|376267	http://amigo.geneontology.org/amigo/term/GO:0005525
hsa-miR-497-5p	GO:0032550	MF	purine ribonucleoside binding	Gene Ontology	9	67	0.00144872	0.010403	51199|2982|2773|2776|2665|10383|1759|51209|376267	http://amigo.geneontology.org/amigo/term/GO:0032550
hsa-miR-497-5p	GO:0016055	BP	Wnt signaling pathway	Gene Ontology	11	96	0.00147196	0.0105537	5728|57154|10413|998|5563|5693|22881|1896|154810|80114|192669	http://amigo.geneontology.org/amigo/term/GO:0016055
hsa-miR-497-5p	GO:0030054	CC	cell junction	Gene Ontology	16	177	0.00149752	0.0107206	3716|50488|140730|7074|9817|122786|998|8994|64326|7106|55740|56947|120892|26503|81848|10015	http://amigo.geneontology.org/amigo/term/GO:0030054
hsa-miR-497-5p	GO:0016607	CC	nuclear speck	Gene Ontology	6	30	0.00153089	0.0109261	79677|10285|10921|6239|84271|56252	http://amigo.geneontology.org/amigo/term/GO:0016607
hsa-miR-497-5p	GO:0051248	BP	negative regulation of protein metabolic process	Gene Ontology	14	144	0.00154466	0.0110076	23523|7327|7320|25998|11261|9444|1613|79094|2619|1457|2776|81848|80851|1654	http://amigo.geneontology.org/amigo/term/GO:0051248
hsa-miR-497-5p	GO:0004540	MF	ribonuclease activity	Gene Ontology	4	11	0.00156523	0.0110867	6041|60528|6050|54913	http://amigo.geneontology.org/amigo/term/GO:0004540
hsa-miR-497-5p	GO:0075733	BP	intracellular transport of virus	Gene Ontology	4	11	0.00156523	0.0110867	23511|55706|7311|23225	http://amigo.geneontology.org/amigo/term/GO:0075733
hsa-miR-497-5p	GO:0009117	BP	nucleotide metabolic process	Gene Ontology	11	97	0.00158742	0.011227	1738|5166|56894|3643|5563|405|10606|5471|7374|6095|4842	http://amigo.geneontology.org/amigo/term/GO:0009117
hsa-miR-497-5p	GO:0044092	BP	negative regulation of molecular function	Gene Ontology	15	162	0.00166939	0.0117623	25998|81611|8178|3480|9817|9908|5599|22843|7128|23063|10105|6717|9647|8323|51763	http://amigo.geneontology.org/amigo/term/GO:0044092
hsa-miR-497-5p	GO:0030424	CC	axon	Gene Ontology	10	83	0.00169744	0.011933	8867|50488|8239|4644|26258|351|3064|3673|1173|120892	http://amigo.geneontology.org/amigo/term/GO:0030424
hsa-miR-497-5p	GO:0046914	MF	transition metal ion binding	Gene Ontology	18	215	0.0017467	0.012261	9063|27|90441|580|8445|84101|9830|54469|55217|8994|50|222236|93550|26108|5494|131870|6095|1107	http://amigo.geneontology.org/amigo/term/GO:0046914
hsa-miR-497-5p	GO:0042592	BP	homeostatic process	Gene Ontology	19	233	0.0017503	0.0122678	6780|3667|27113|4170|5165|596|3643|94103|6117|25800|3708|7128|91|908|54583|415116|4253|23545|27346	http://amigo.geneontology.org/amigo/term/GO:0042592
hsa-miR-497-5p	GO:0010562	BP	positive regulation of phosphorus metabolic process	Gene Ontology	15	163	0.00176465	0.0123499	9928|51429|142679|208|5575|5573|5562|1857|6385|5604|51719|80829|10818|219771|2066	http://amigo.geneontology.org/amigo/term/GO:0010562
hsa-miR-497-5p	GO:0072593	BP	reactive oxygen species metabolic process	Gene Ontology	6	31	0.00177307	0.0123903	1545|6542|596|208|120892|6095	http://amigo.geneontology.org/amigo/term/GO:0072593
hsa-miR-497-5p	GO:0048646	BP	anatomical structure formation involved in morphogenesis	Gene Ontology	13	130	0.00177978	0.0124187	10818|5728|51804|1432|8092|6299|998|5048|3673|136319|1386|2247|1901	http://amigo.geneontology.org/amigo/term/GO:0048646
hsa-miR-497-5p	GO:0012501	BP	programmed cell death	Gene Ontology	22	289	0.0018027	0.0125599	9263|889|79094|7126|103|10105|6609|7832|6648|55294|56603|10625|4214|9826|9700|4170|5515|1432|23064|51107|51588|351	http://amigo.geneontology.org/amigo/term/GO:0012501
hsa-miR-497-5p	GO:0044248	BP	cellular catabolic process	Gene Ontology	23	308	0.00181241	0.0126088	64768|596|139285|550|10730|11200|55294|5255|3643|11261|9810|1613|51752|7514|5861|8239|5166|23130|5515|10015|22863|7317|23001	http://amigo.geneontology.org/amigo/term/GO:0044248
hsa-miR-497-5p	GO:0045732	BP	positive regulation of protein catabolic process	Gene Ontology	7	43	0.00181959	0.01264	51429|754|54467|51343|9810|153222|55905	http://amigo.geneontology.org/amigo/term/GO:0045732
hsa-miR-497-5p	GO:0097435	BP	supramolecular fiber organization	Gene Ontology	11	99	0.00184057	0.0127479	347240|4082|1545|55243|596|4088|23332|22843|51763|359845|136319	http://amigo.geneontology.org/amigo/term/GO:0097435
hsa-miR-497-5p	GO:0055085	BP	transmembrane transport	Gene Ontology	19	235	0.00191504	0.0132149	168507|55244|6542|4363|6584|5830|84102|55186|84804|11315|6520|3708|10762|10971|55144|8645|3643|5144|291	http://amigo.geneontology.org/amigo/term/GO:0055085
hsa-miR-497-5p	GO:0042327	BP	positive regulation of phosphorylation	Gene Ontology	14	148	0.00195476	0.013415	64762|1026|894|57826|1600|2889|5573|91|2180|112|6899|2247|219771|50937	http://amigo.geneontology.org/amigo/term/GO:0042327
hsa-miR-497-5p	GO:0070011	MF	peptidase activity, acting on L-amino acid peptides	Gene Ontology	14	148	0.00195476	0.013415	27113|4088|54878|1457|23478|5648|831|23385|9958|3064|63929|9700|85015|3730	http://amigo.geneontology.org/amigo/term/GO:0070011
hsa-miR-497-5p	GO:0010921	BP	regulation of phosphatase activity	Gene Ontology	5	21	0.00195835	0.013415	8178|23523|51400|161742|57181	http://amigo.geneontology.org/amigo/term/GO:0010921
hsa-miR-497-5p	GO:2000058	BP	regulation of ubiquitin-dependent protein catabolic process	Gene Ontology	5	21	0.00195835	0.013415	154214|5728|2768|2932|255488	http://amigo.geneontology.org/amigo/term/GO:2000058
hsa-miR-497-5p	GO:0044257	BP	cellular protein catabolic process	Gene Ontology	11	100	0.00197894	0.0135264	57589|6400|23607|8507|1191|139285|9817|51449|7126|84313|55905	http://amigo.geneontology.org/amigo/term/GO:0044257
hsa-miR-497-5p	GO:0010647	BP	positive regulation of cell communication	Gene Ontology	19	236	0.00200219	0.0136654	84336|64750|50488|55161|6299|596|57153|4296|161742|1857|51588|5601|51135|3673|6597|8471|26057|4842|64710	http://amigo.geneontology.org/amigo/term/GO:0010647
hsa-miR-497-5p	GO:0043620	BP	regulation of DNA-templated transcription in response to stress	Gene Ontology	4	12	0.00202878	0.0137766	54583|51360|6197|7422	http://amigo.geneontology.org/amigo/term/GO:0043620
hsa-miR-497-5p	GO:0045445	BP	myoblast differentiation	Gene Ontology	4	12	0.00202878	0.0137766	7182|831|1432|6934	http://amigo.geneontology.org/amigo/term/GO:0045445
hsa-miR-497-5p	GO:0048706	BP	embryonic skeletal system development	Gene Ontology	4	12	0.00202878	0.0137766	57728|2254|51804|4087	http://amigo.geneontology.org/amigo/term/GO:0048706
hsa-miR-497-5p	GO:0005667	CC	transcription factor complex	Gene Ontology	7	44	0.00204554	0.0137905	2965|10413|8092|4088|9219|3159|6874	http://amigo.geneontology.org/amigo/term/GO:0005667
hsa-miR-497-5p	GO:0019902	MF	phosphatase binding	Gene Ontology	6	32	0.0020432	0.0137905	23523|996|51400|51433|161742|11215	http://amigo.geneontology.org/amigo/term/GO:0019902
hsa-miR-497-5p	GO:0043583	BP	ear development	Gene Ontology	6	32	0.0020432	0.0137905	57728|9261|596|1857|6385|2254	http://amigo.geneontology.org/amigo/term/GO:0043583
hsa-miR-497-5p	GO:0120025	CC	plasma membrane bounded cell projection	Gene Ontology	20	255	0.00206018	0.0138692	5728|585|3799|6584|7074|4891|4735|2932|11315|80331|23382|26258|23607|3064|55740|3098|55742|25800|6623|6538	http://amigo.geneontology.org/amigo/term/GO:0120025
hsa-miR-497-5p	GO:0045937	BP	positive regulation of phosphate metabolic process	Gene Ontology	13	133	0.00214164	0.0143455	4214|51719|1026|11200|1191|4296|2932|5562|5563|6385|22863|5781|1399	http://amigo.geneontology.org/amigo/term/GO:0045937
hsa-miR-497-5p	GO:0005975	BP	carbohydrate metabolic process	Gene Ontology	10	86	0.00215527	0.0143956	3628|1432|5165|64768|56623|5563|7355|3098|6095|23193	http://amigo.geneontology.org/amigo/term/GO:0005975
hsa-miR-497-5p	GO:0016311	BP	dephosphorylation	Gene Ontology	10	86	0.00215527	0.0143956	8493|51559|142679|81611|8867|23076|221294|23175|23035|5515	http://amigo.geneontology.org/amigo/term/GO:0016311
hsa-miR-497-5p	GO:0051960	BP	regulation of nervous system development	Gene Ontology	12	117	0.00216695	0.0144149	4152|259266|51804|22849|8507|56623|5376|653464|5818|54437|3981|2066	http://amigo.geneontology.org/amigo/term/GO:0051960
hsa-miR-497-5p	GO:0031435	MF	mitogen-activated protein kinase kinase kinase binding	Gene Ontology	3	5	0.00217354	0.0144149	4296|6929|998	http://amigo.geneontology.org/amigo/term/GO:0031435
hsa-miR-497-5p	GO:0031624	MF	ubiquitin conjugating enzyme binding	Gene Ontology	3	5	0.00217354	0.0144149	54467|154214|55905	http://amigo.geneontology.org/amigo/term/GO:0031624
hsa-miR-497-5p	GO:1901983	BP	regulation of protein acetylation	Gene Ontology	3	5	0.00217354	0.0144149	1111|9474|6879	http://amigo.geneontology.org/amigo/term/GO:1901983
hsa-miR-497-5p	GO:0043603	BP	cellular amide metabolic process	Gene Ontology	15	167	0.00219223	0.0145183	51504|1738|92259|1968|1994|89978|4677|7311|9801|23478|65008|2180|23112|5515|51166	http://amigo.geneontology.org/amigo/term/GO:0043603
hsa-miR-497-5p	GO:0031965	CC	nuclear membrane	Gene Ontology	8	58	0.00225904	0.0149081	54980|161176|2776|286148|3708|23001|9883|23225	http://amigo.geneontology.org/amigo/term/GO:0031965
hsa-miR-497-5p	GO:0048584	BP	positive regulation of response to stimulus	Gene Ontology	24	333	0.00225665	0.0149081	4087|10670|28996|5499|10105|80829|259266|5728|596|2260|2247|3600|3662|208|55824|3159|7337|27113|10095|4296|7311|7468|22881|50937	http://amigo.geneontology.org/amigo/term/GO:0048584
hsa-miR-497-5p	GO:0042995	CC	cell projection	Gene Ontology	21	276	0.00227226	0.0149743	1738|56896|55243|6584|55201|8239|127933|4218|3673|403|6334|2768|23382|2195|523|55238|6717|3098|55585|25790|5538	http://amigo.geneontology.org/amigo/term/GO:0042995
hsa-miR-497-5p	GO:0007015	BP	actin filament organization	Gene Ontology	7	45	0.00229257	0.0150657	286527|4739|998|22921|51763|9181|10788	http://amigo.geneontology.org/amigo/term/GO:0007015
hsa-miR-497-5p	GO:0033043	BP	regulation of organelle organization	Gene Ontology	17	203	0.00230302	0.0151132	10971|79753|56947|55243|89978|55201|4134|10576|80119|9783|51763|3998|9700|2072|7182|3159|10015	http://amigo.geneontology.org/amigo/term/GO:0033043
hsa-miR-497-5p	GO:0007050	BP	cell cycle arrest	Gene Ontology	6	33	0.00234328	0.0152386	11180|831|7311|5562|5604|4850	http://amigo.geneontology.org/amigo/term/GO:0007050
hsa-miR-497-5p	GO:0019867	CC	outer membrane	Gene Ontology	6	33	0.00234328	0.0152386	56947|1386|23175|3098|120892|1654	http://amigo.geneontology.org/amigo/term/GO:0019867
hsa-miR-497-5p	GO:1901605	BP	alpha-amino acid metabolic process	Gene Ontology	6	33	0.00234328	0.0152386	55256|1738|29968|5832|5723|4953	http://amigo.geneontology.org/amigo/term/GO:1901605
hsa-miR-497-5p	GO:0009895	BP	negative regulation of catabolic process	Gene Ontology	6	33	0.00234328	0.0152386	57589|9261|8925|9967|11315|120892	http://amigo.geneontology.org/amigo/term/GO:0009895
hsa-miR-497-5p	GO:0098798	CC	mitochondrial protein complex	Gene Ontology	6	33	0.00234328	0.0152386	4711|55572|29928|10105|26515|10845	http://amigo.geneontology.org/amigo/term/GO:0098798
hsa-miR-497-5p	GO:0008233	MF	peptidase activity	Gene Ontology	15	169	0.0024363	0.0158107	10318|388630|51232|8772|208|9512|5069|10730|710|1457|131870|219333|9700|8904|84101	http://amigo.geneontology.org/amigo/term/GO:0008233
hsa-miR-497-5p	GO:0032446	BP	protein modification by small protein conjugation	Gene Ontology	14	152	0.00245121	0.0158854	284996|54778|25847|54467|7267|51343|9063|9474|5728|11275|8454|5469|8021|1642	http://amigo.geneontology.org/amigo/term/GO:0032446
hsa-miR-497-5p	GO:0048514	BP	blood vessel morphogenesis	Gene Ontology	8	59	0.00248709	0.0160513	7128|3200|219699|28996|7422|204851|2260|8131	http://amigo.geneontology.org/amigo/term/GO:0048514
hsa-miR-497-5p	GO:0051186	BP	cofactor metabolic process	Gene Ontology	8	59	0.00248709	0.0160513	51166|211|4891|79993|79094|2180|3145|23382	http://amigo.geneontology.org/amigo/term/GO:0051186
hsa-miR-497-5p	GO:0044389	MF	ubiquitin-like protein ligase binding	Gene Ontology	7	46	0.00256196	0.0164416	1026|596|5144|51588|8453|3313|3312	http://amigo.geneontology.org/amigo/term/GO:0044389
hsa-miR-497-5p	GO:0051704	BP	multi-organism process	Gene Ontology	30	456	0.00257281	0.0164416	130340|9367|55324|6890|10576|1738|831|55294|5903|7203|11016|6197|8614|56603|84056|7311|10318|54890|3662|6732|8454|9474|6157|3159|8021|7335|5573|5693|83700|3981	http://amigo.geneontology.org/amigo/term/GO:0051704
hsa-miR-497-5p	GO:0051893	BP	regulation of focal adhesion assembly	Gene Ontology	4	13	0.00257914	0.0164416	6385|23332|3987|54828	http://amigo.geneontology.org/amigo/term/GO:0051893
hsa-miR-497-5p	GO:0034502	BP	protein localization to chromosome	Gene Ontology	4	13	0.00257914	0.0164416	908|545|10576|26354	http://amigo.geneontology.org/amigo/term/GO:0034502
hsa-miR-497-5p	GO:0048208	BP	COPII vesicle coating	Gene Ontology	4	13	0.00257914	0.0164416	5537|3998|5861|23243	http://amigo.geneontology.org/amigo/term/GO:0048208
hsa-miR-497-5p	GO:0043068	BP	positive regulation of programmed cell death	Gene Ontology	11	104	0.00261953	0.0166424	27250|5599|7311|4891|4296|2932|998|10628|56259|9181|10105	http://amigo.geneontology.org/amigo/term/GO:0043068
hsa-miR-497-5p	GO:0019882	BP	antigen processing and presentation	Gene Ontology	6	34	0.00267533	0.0169625	130340|3831|6890|5243|51752|163	http://amigo.geneontology.org/amigo/term/GO:0019882
hsa-miR-497-5p	GO:0032549	MF	ribonucleoside binding	Gene Ontology	9	74	0.00268383	0.0169934	205|57826|60558|4218|55207|26354|120892|5861|5862	http://amigo.geneontology.org/amigo/term/GO:0032549
hsa-miR-497-5p	GO:0002253	BP	activation of immune response	Gene Ontology	10	89	0.00270754	0.0171088	10318|5728|55845|60|5693|3659|51517|163486|25942|5608	http://amigo.geneontology.org/amigo/term/GO:0002253
hsa-miR-497-5p	GO:0006259	BP	DNA metabolic process	Gene Ontology	13	137	0.00271617	0.0171402	55388|1111|1026|580|9134|116138|7374|3070|80119|7468|26354|3014|79703	http://amigo.geneontology.org/amigo/term/GO:0006259
hsa-miR-497-5p	GO:0010498	BP	proteasomal protein catabolic process	Gene Ontology	8	60	0.00273277	0.0172218	79845|147339|7320|2768|8454|5708|51444|7327	http://amigo.geneontology.org/amigo/term/GO:0010498
hsa-miR-497-5p	GO:0051130	BP	positive regulation of cellular component organization	Gene Ontology	16	189	0.0027614	0.0172744	23332|7320|89978|7203|9469|4297|6117|998|9474|25782|5601|10576|10788|4602|3981|51203	http://amigo.geneontology.org/amigo/term/GO:0051130
hsa-miR-497-5p	GO:1903364	BP	positive regulation of cellular protein catabolic process	Gene Ontology	5	23	0.0027595	0.0172744	51444|2932|7128|255488|57154	http://amigo.geneontology.org/amigo/term/GO:1903364
hsa-miR-497-5p	GO:0008643	BP	carbohydrate transport	Gene Ontology	5	23	0.0027595	0.0172744	9883|154091|10762|23279|3667	http://amigo.geneontology.org/amigo/term/GO:0008643
hsa-miR-497-5p	GO:0030509	BP	BMP signaling pathway	Gene Ontology	5	23	0.0027595	0.0172744	285704|57154|4087|9958|55273	http://amigo.geneontology.org/amigo/term/GO:0030509
hsa-miR-497-5p	GO:2001243	BP	negative regulation of intrinsic apoptotic signaling pathway	Gene Ontology	5	23	0.0027595	0.0172744	120892|6648|26155|1654|596	http://amigo.geneontology.org/amigo/term/GO:2001243
hsa-miR-497-5p	GO:0022890	MF	inorganic cation transmembrane transporter activity	Gene Ontology	12	121	0.00279544	0.0174641	54207|84102|6558|168507|498|27173|10105|6717|26503|25800|57181|6538	http://amigo.geneontology.org/amigo/term/GO:0022890
hsa-miR-497-5p	GO:0005856	CC	cytoskeleton	Gene Ontology	23	320	0.00283928	0.017679	79659|2773|55845|23607|6623|3799|3796|1613|1111|5903|55740|4842|23332|585|898|2932|1495|5048|9700|57728|51256|57489|4296	http://amigo.geneontology.org/amigo/term/GO:0005856
hsa-miR-497-5p	GO:0051128	BP	regulation of cellular component organization	Gene Ontology	23	320	0.00283928	0.017679	6383|55243|728642|5601|51517|23189|11138|27|1191|1613|10247|9783|23332|23607|998|56947|4602|7840|51429|22863|5818|80119|1457	http://amigo.geneontology.org/amigo/term/GO:0051128
hsa-miR-497-5p	GO:0090150	BP	establishment of protein localization to membrane	Gene Ontology	7	47	0.00285502	0.0177064	10890|3875|65055|25782|161176|3308|6208	http://amigo.geneontology.org/amigo/term/GO:0090150
hsa-miR-497-5p	GO:0098857	CC	membrane microdomain	Gene Ontology	7	47	0.00285502	0.0177064	6385|153129|1495|351|285704|3643|4842	http://amigo.geneontology.org/amigo/term/GO:0098857
hsa-miR-497-5p	GO:0009887	BP	animal organ morphogenesis	Gene Ontology	14	155	0.00288809	0.0178878	10413|8092|4087|8879|998|1399|6899|204851|23424|3673|55742|10818|7128|1896	http://amigo.geneontology.org/amigo/term/GO:0009887
hsa-miR-497-5p	GO:0006508	BP	proteolysis	Gene Ontology	19	245	0.00294826	0.0182364	253980|51360|5708|7128|55294|11174|139285|2619|64326|5648|171019|205564|8239|11315|114803|85015|5608|1654|55905	http://amigo.geneontology.org/amigo/term/GO:0006508
hsa-miR-497-5p	GO:0000209	BP	protein polyubiquitination	Gene Ontology	6	35	0.00304142	0.0187507	154214|25897|865|6477|5693|8454	http://amigo.geneontology.org/amigo/term/GO:0000209
hsa-miR-497-5p	GO:0032101	BP	regulation of response to external stimulus	Gene Ontology	14	156	0.00304717	0.0187615	3916|585|1147|25960|2339|51191|661|5604|3716|3659|1690|25942|6095|8357	http://amigo.geneontology.org/amigo/term/GO:0032101
hsa-miR-497-5p	GO:0051049	BP	regulation of transport	Gene Ontology	20	265	0.00310463	0.0190902	79576|10971|50488|8867|580|596|6814|11261|9527|2932|85465|4218|7220|3708|10762|6934|153222|26297|6623|3301	http://amigo.geneontology.org/amigo/term/GO:0051049
hsa-miR-497-5p	GO:0022604	BP	regulation of cell morphogenesis	Gene Ontology	9	76	0.00315796	0.0192305	9204|84894|84258|10979|1613|150465|5601|7422|1600	http://amigo.geneontology.org/amigo/term/GO:0022604
hsa-miR-497-5p	GO:0034655	BP	nucleobase-containing compound catabolic process	Gene Ontology	9	76	0.00315796	0.0192305	7812|1994|9967|115752|1975|55802|6041|131870|6050	http://amigo.geneontology.org/amigo/term/GO:0034655
hsa-miR-497-5p	GO:0040012	BP	regulation of locomotion	Gene Ontology	12	123	0.00316104	0.0192305	5728|27|50488|54828|25960|64750|1809|9219|54437|91|120892|114803	http://amigo.geneontology.org/amigo/term/GO:0040012
hsa-miR-497-5p	GO:0070201	BP	regulation of establishment of protein localization	Gene Ontology	12	123	0.00316104	0.0192305	3667|580|596|5599|2850|998|9474|26130|6934|11338|120892|3312	http://amigo.geneontology.org/amigo/term/GO:0070201
hsa-miR-497-5p	GO:0006829	BP	zinc ion transport	Gene Ontology	3	6	0.00317465	0.0192305	4891|64116|27173	http://amigo.geneontology.org/amigo/term/GO:0006829
hsa-miR-497-5p	GO:0016050	BP	vesicle organization	Gene Ontology	7	48	0.00317308	0.0192305	51375|84258|208|6385|10564|84313|8406	http://amigo.geneontology.org/amigo/term/GO:0016050
hsa-miR-497-5p	GO:0042771	BP	intrinsic apoptotic signaling pathway in response to DNA damage by p53 class mediator	Gene Ontology	3	6	0.00317465	0.0192305	28996|1026|51246	http://amigo.geneontology.org/amigo/term/GO:0042771
hsa-miR-497-5p	GO:0060043	BP	regulation of cardiac muscle cell proliferation	Gene Ontology	3	6	0.00317465	0.0192305	2260|2247|1432	http://amigo.geneontology.org/amigo/term/GO:0060043
hsa-miR-497-5p	GO:0005795	CC	Golgi stack	Gene Ontology	5	24	0.00323834	0.0192798	6482|56623|2800|9527|124583	http://amigo.geneontology.org/amigo/term/GO:0005795
hsa-miR-497-5p	GO:0007049	BP	cell cycle	Gene Ontology	20	266	0.00322991	0.0192798	2965|1457|64105|4335|1432|55294|9126|127933|208|57082|5469|2619|403|3400|80712|5537|5527|5494|2072|2260	http://amigo.geneontology.org/amigo/term/GO:0007049
hsa-miR-497-5p	GO:0014065	BP	phosphatidylinositol 3-kinase signaling	Gene Ontology	5	24	0.00323834	0.0192798	7337|3480|2260|2247|2254	http://amigo.geneontology.org/amigo/term/GO:0014065
hsa-miR-497-5p	GO:0015031	BP	protein transport	Gene Ontology	21	285	0.00322906	0.0192798	55374|79753|84271|4170|9392|130340|7311|4891|2932|85465|3708|55308|11276|10762|9883|10526|3320|5494|103|5862|26297	http://amigo.geneontology.org/amigo/term/GO:0015031
hsa-miR-497-5p	GO:0034033	BP	purine nucleoside bisphosphate biosynthetic process	Gene Ontology	4	14	0.00322382	0.0192798	53354|51703|1738|55750	http://amigo.geneontology.org/amigo/term/GO:0034033
hsa-miR-497-5p	GO:1903599	BP	positive regulation of autophagy of mitochondrion	Gene Ontology	5	24	0.00323834	0.0192798	7182|9783|64768|11315|9474	http://amigo.geneontology.org/amigo/term/GO:1903599
hsa-miR-497-5p	GO:1903046	BP	meiotic cell cycle process	Gene Ontology	5	24	0.00323834	0.0192798	9700|2072|51343|5573|56603	http://amigo.geneontology.org/amigo/term/GO:1903046
hsa-miR-497-5p	GO:1904064	BP	positive regulation of cation transmembrane transport	Gene Ontology	4	14	0.00322382	0.0192798	7220|3064|4842|6717	http://amigo.geneontology.org/amigo/term/GO:1904064
hsa-miR-497-5p	GO:0031267	MF	small GTPase binding	Gene Ontology	9	77	0.00341851	0.0202496	10260|10152|3667|5830|1613|9826|9181|22836|26297	http://amigo.geneontology.org/amigo/term/GO:0031267
hsa-miR-497-5p	GO:0034622	BP	cellular protein-containing complex assembly	Gene Ontology	13	141	0.00341087	0.0202496	8867|22868|55243|8664|55052|7311|64061|55572|8450|5494|103|10788|163	http://amigo.geneontology.org/amigo/term/GO:0034622
hsa-miR-497-5p	GO:0031668	BP	cellular response to extracellular stimulus	Gene Ontology	6	36	0.00344363	0.0203213	3600|5166|596|53349|5469|9681	http://amigo.geneontology.org/amigo/term/GO:0031668
hsa-miR-497-5p	GO:0005126	MF	cytokine receptor binding	Gene Ontology	7	49	0.00351748	0.020666	9392|8772|4254|51752|9958|51135|10818	http://amigo.geneontology.org/amigo/term/GO:0005126
hsa-miR-497-5p	GO:0005765	CC	lysosomal membrane	Gene Ontology	7	49	0.00351748	0.020666	7311|55788|23545|523|26503|90809|162	http://amigo.geneontology.org/amigo/term/GO:0005765
hsa-miR-497-5p	GO:0018209	BP	peptidyl-serine modification	Gene Ontology	7	49	0.00351748	0.020666	152559|10000|5165|5144|998|23012|11315	http://amigo.geneontology.org/amigo/term/GO:0018209
hsa-miR-497-5p	GO:0005759	CC	mitochondrial matrix	Gene Ontology	8	63	0.00358469	0.0209558	6821|51805|10845|55052|9801|7818|23424|22907	http://amigo.geneontology.org/amigo/term/GO:0005759
hsa-miR-497-5p	GO:0007389	BP	pattern specification process	Gene Ontology	8	63	0.00358469	0.0209558	57728|4090|4088|4297|441478|585|10370|80114	http://amigo.geneontology.org/amigo/term/GO:0007389
hsa-miR-497-5p	GO:0009896	BP	positive regulation of catabolic process	Gene Ontology	8	63	0.00358469	0.0209558	154214|55294|1191|405|1457|153222|7832|23192	http://amigo.geneontology.org/amigo/term/GO:0009896
hsa-miR-497-5p	GO:0032880	BP	regulation of protein localization	Gene Ontology	13	142	0.00360536	0.0210504	4691|79753|51804|2040|5599|83593|85465|130399|3708|7327|79576|4842|26297	http://amigo.geneontology.org/amigo/term/GO:0032880
hsa-miR-497-5p	GO:0044093	BP	positive regulation of molecular function	Gene Ontology	19	250	0.00361849	0.0210876	219771|4214|2889|1600|400|130399|5604|1654|9826|6929|7422|351|9181|367|9647|3987|11315|2066|11138	http://amigo.geneontology.org/amigo/term/GO:0044093
hsa-miR-497-5p	GO:0010648	BP	negative regulation of cell communication	Gene Ontology	16	195	0.00366719	0.0213316	10318|5728|6717|25960|1191|5562|57406|5693|3708|3156|55654|8904|25769|103|1654|80114	http://amigo.geneontology.org/amigo/term/GO:0010648
hsa-miR-497-5p	GO:0046700	BP	heterocycle catabolic process	Gene Ontology	9	78	0.00369566	0.0214573	127933|1432|167227|5693|51441|5708|8021|9045|192669	http://amigo.geneontology.org/amigo/term/GO:0046700
hsa-miR-497-5p	GO:0048878	BP	chemical homeostasis	Gene Ontology	14	160	0.00375687	0.0217857	6780|27113|596|10087|11261|1642|1182|36|6890|27|2030|25942|4253|1901	http://amigo.geneontology.org/amigo/term/GO:0048878
hsa-miR-497-5p	GO:0070887	BP	cellular response to chemical stimulus	Gene Ontology	28	428	0.00376255	0.0217916	7311|143686|3659|4691|27244|10890|3588|51135|8904|25942|54778|51283|8772|2932|5144|8202|79447|5048|5469|3313|51701|90441|5573|4486|83700|51094|2674|351	http://amigo.geneontology.org/amigo/term/GO:0070887
hsa-miR-497-5p	GO:0031503	BP	protein-containing complex localization	Gene Ontology	5	25	0.00377416	0.021805	11338|10921|54890|7514|23511	http://amigo.geneontology.org/amigo/term/GO:0031503
hsa-miR-497-5p	GO:0045814	BP	negative regulation of gene expression, epigenetic	Gene Ontology	5	25	0.00377416	0.021805	85235|3159|8331|55766|3014	http://amigo.geneontology.org/amigo/term/GO:0045814
hsa-miR-497-5p	GO:0006022	BP	aminoglycan metabolic process	Gene Ontology	6	37	0.00388407	0.0223589	3600|11261|29940|6385|6383|26035	http://amigo.geneontology.org/amigo/term/GO:0006022
hsa-miR-497-5p	GO:0070838	BP	divalent metal ion transport	Gene Ontology	8	64	0.00391009	0.0224244	27113|3064|7220|64116|168507|27092|6717|2247	http://amigo.geneontology.org/amigo/term/GO:0070838
hsa-miR-497-5p	GO:0000077	BP	DNA damage checkpoint	Gene Ontology	4	15	0.0039701	0.0224796	1026|51343|1432|3014	http://amigo.geneontology.org/amigo/term/GO:0000077
hsa-miR-497-5p	GO:1901701	BP	cellular response to oxygen-containing compound	Gene Ontology	14	161	0.00395384	0.0224796	5872|27|1432|10131|3480|143686|23064|153129|51094|1495|351|10105|3673|7703	http://amigo.geneontology.org/amigo/term/GO:1901701
hsa-miR-497-5p	GO:0006415	BP	translational termination	Gene Ontology	4	15	0.0039701	0.0224796	51504|7818|84340|92399	http://amigo.geneontology.org/amigo/term/GO:0006415
hsa-miR-497-5p	GO:0043266	BP	regulation of potassium ion transport	Gene Ontology	4	15	0.0039701	0.0224796	3799|3755|4842|51719	http://amigo.geneontology.org/amigo/term/GO:0043266
hsa-miR-497-5p	GO:0055017	BP	cardiac muscle tissue growth	Gene Ontology	4	15	0.0039701	0.0224796	7049|2254|5573|1901	http://amigo.geneontology.org/amigo/term/GO:0055017
hsa-miR-497-5p	GO:0044212	MF	transcription regulatory region DNA binding	Gene Ontology	13	144	0.0040213	0.022701	6299|6597|23528|3516|9967|6929|3659|6879|7975|6717|64919|8939|9219	http://amigo.geneontology.org/amigo/term/GO:0044212
hsa-miR-497-5p	GO:0071495	BP	cellular response to endogenous stimulus	Gene Ontology	16	197	0.00401852	0.022701	4088|490|64750|7311|3516|23175|7049|5469|8611|3065|3480|6899|7182|10818|8471|3730	http://amigo.geneontology.org/amigo/term/GO:0071495
hsa-miR-497-5p	GO:0009719	BP	response to endogenous stimulus	Gene Ontology	18	234	0.00404587	0.0228122	7337|143686|4090|6879|3480|596|8992|5723|2774|4218|5286|57085|9967|10979|523|11315|3987|6814	http://amigo.geneontology.org/amigo/term/GO:0009719
hsa-miR-497-5p	GO:0019904	MF	protein domain specific binding	Gene Ontology	10	95	0.00414924	0.0233388	3667|51232|8772|26574|9444|9618|25836|6934|490|3301	http://amigo.geneontology.org/amigo/term/GO:0019904
hsa-miR-497-5p	GO:0048729	BP	tissue morphogenesis	Gene Ontology	10	95	0.00414924	0.0233388	23332|585|5708|7074|7311|3516|55273|5499|54583|163	http://amigo.geneontology.org/amigo/term/GO:0048729
hsa-miR-497-5p	GO:0006644	BP	phospholipid metabolic process	Gene Ontology	8	65	0.00425782	0.0238922	56894|8867|259230|8895|222236|8611|10423|2066	http://amigo.geneontology.org/amigo/term/GO:0006644
hsa-miR-497-5p	GO:0006402	BP	mRNA catabolic process	Gene Ontology	7	51	0.00429079	0.0239911	127933|9567|51013|6041|192670|6157|192669	http://amigo.geneontology.org/amigo/term/GO:0006402
hsa-miR-497-5p	GO:0030133	CC	transport vesicle	Gene Ontology	7	51	0.00429079	0.0239911	84258|83992|1759|120892|26503|160|22820	http://amigo.geneontology.org/amigo/term/GO:0030133
hsa-miR-497-5p	GO:1901293	BP	nucleoside phosphate biosynthetic process	Gene Ontology	7	51	0.00429079	0.0239911	518|10165|5631|132|10606|1741|4842	http://amigo.geneontology.org/amigo/term/GO:1901293
hsa-miR-497-5p	GO:0005680	CC	anaphase-promoting complex	Gene Ontology	3	7	0.00441627	0.024033	8697|996|51433	http://amigo.geneontology.org/amigo/term/GO:0005680
hsa-miR-497-5p	GO:0006006	BP	glucose metabolic process	Gene Ontology	5	26	0.00437058	0.024033	6095|226|1432|5562|8445	http://amigo.geneontology.org/amigo/term/GO:0006006
hsa-miR-497-5p	GO:0007276	BP	gamete generation	Gene Ontology	11	112	0.00440024	0.024033	6597|8239|6732|5819|55706|9897|26108|3267|8611|80025|55905	http://amigo.geneontology.org/amigo/term/GO:0007276
hsa-miR-497-5p	GO:0035145	CC	exon-exon junction complex	Gene Ontology	3	7	0.00441627	0.024033	84271|6426|9967	http://amigo.geneontology.org/amigo/term/GO:0035145
hsa-miR-497-5p	GO:0072358	BP	cardiovascular system development	Gene Ontology	11	112	0.00440024	0.024033	1432|11174|8879|889|2889|3516|80712|7422|10413|2247|6095	http://amigo.geneontology.org/amigo/term/GO:0072358
hsa-miR-497-5p	GO:1905477	BP	positive regulation of protein localization to membrane	Gene Ontology	3	7	0.00441627	0.024033	5599|10971|2040	http://amigo.geneontology.org/amigo/term/GO:1905477
hsa-miR-497-5p	GO:0000152	CC	nuclear ubiquitin ligase complex	Gene Ontology	3	7	0.00441627	0.024033	51343|996|80012	http://amigo.geneontology.org/amigo/term/GO:0000152
hsa-miR-497-5p	GO:0007077	BP	mitotic nuclear envelope disassembly	Gene Ontology	3	7	0.00441627	0.024033	5903|23279|23511	http://amigo.geneontology.org/amigo/term/GO:0007077
hsa-miR-497-5p	GO:0017137	MF	Rab GTPase binding	Gene Ontology	5	26	0.00437058	0.024033	79803|79774|201627|4218|55654	http://amigo.geneontology.org/amigo/term/GO:0017137
hsa-miR-497-5p	GO:0031099	BP	regeneration	Gene Ontology	6	38	0.00436486	0.024033	607|1026|831|5728|83700|2066	http://amigo.geneontology.org/amigo/term/GO:0031099
hsa-miR-497-5p	GO:0031122	BP	cytoplasmic microtubule organization	Gene Ontology	3	7	0.00441627	0.024033	84056|23332|5048	http://amigo.geneontology.org/amigo/term/GO:0031122
hsa-miR-497-5p	GO:0031345	BP	negative regulation of cell projection organization	Gene Ontology	5	26	0.00437058	0.024033	1600|4134|80031|54437|5048	http://amigo.geneontology.org/amigo/term/GO:0031345
hsa-miR-497-5p	GO:0031497	BP	chromatin assembly	Gene Ontology	5	26	0.00437058	0.024033	3070|11339|3159|26155|57082	http://amigo.geneontology.org/amigo/term/GO:0031497
hsa-miR-497-5p	GO:0034593	MF	phosphatidylinositol bisphosphate phosphatase activity	Gene Ontology	3	7	0.00441627	0.024033	8867|5728|90809	http://amigo.geneontology.org/amigo/term/GO:0034593
hsa-miR-497-5p	GO:0042551	BP	neuron maturation	Gene Ontology	3	7	0.00441627	0.024033	120892|23294|2932	http://amigo.geneontology.org/amigo/term/GO:0042551
hsa-miR-497-5p	GO:0046626	BP	regulation of insulin receptor signaling pathway	Gene Ontology	3	7	0.00441627	0.024033	55788|51094|64710	http://amigo.geneontology.org/amigo/term/GO:0046626
hsa-miR-497-5p	GO:0051031	BP	tRNA transport	Gene Ontology	3	7	0.00441627	0.024033	5903|11260|10762	http://amigo.geneontology.org/amigo/term/GO:0051031
hsa-miR-497-5p	GO:0044419	BP	interspecies interaction between organisms	Gene Ontology	12	129	0.00449527	0.0244062	4088|23511|10762|3014|6041|8453|4799|6157|103|8021|160|9045	http://amigo.geneontology.org/amigo/term/GO:0044419
hsa-miR-497-5p	GO:0019787	MF	ubiquitin-like protein transferase activity	Gene Ontology	9	81	0.00463377	0.0251146	79845|54778|54467|9810|7128|8450|7126|9867|55905	http://amigo.geneontology.org/amigo/term/GO:0019787
hsa-miR-497-5p	GO:0010256	BP	endomembrane system organization	Gene Ontology	7	52	0.00472249	0.0255363	55654|65055|64225|3064|120892|8021|399979	http://amigo.geneontology.org/amigo/term/GO:0010256
hsa-miR-497-5p	GO:0045785	BP	positive regulation of cell adhesion	Gene Ontology	7	52	0.00472249	0.0255363	9780|3600|4088|998|8772|132|7422	http://amigo.geneontology.org/amigo/term/GO:0045785
hsa-miR-497-5p	GO:0043086	BP	negative regulation of catalytic activity	Gene Ontology	12	130	0.00475597	0.0256729	23523|80851|84101|51400|6992|710|10959|51763|10114|10788|5515|3730	http://amigo.geneontology.org/amigo/term/GO:0043086
hsa-miR-497-5p	GO:0016605	CC	PML body	Gene Ontology	4	16	0.00482497	0.0259557	10114|23001|6670|6117	http://amigo.geneontology.org/amigo/term/GO:0016605
hsa-miR-497-5p	GO:1903845	BP	negative regulation of cellular response to transforming growth factor beta stimulus	Gene Ontology	4	16	0.00482497	0.0259557	7311|64750|7049|4087	http://amigo.geneontology.org/amigo/term/GO:1903845
hsa-miR-497-5p	GO:0051188	BP	cofactor biosynthetic process	Gene Ontology	6	39	0.00488813	0.0262502	53354|29968|5166|4891|27304|55750	http://amigo.geneontology.org/amigo/term/GO:0051188
hsa-miR-497-5p	GO:0048017	BP	inositol lipid-mediated signaling	Gene Ontology	5	27	0.00503116	0.0267728	2260|5728|192670|957|192669	http://amigo.geneontology.org/amigo/term/GO:0048017
hsa-miR-497-5p	GO:0001763	BP	morphogenesis of a branching structure	Gene Ontology	5	27	0.00503116	0.0267728	441478|2260|5499|7422|596	http://amigo.geneontology.org/amigo/term/GO:0001763
hsa-miR-497-5p	GO:0005741	CC	mitochondrial outer membrane	Gene Ontology	5	27	0.00503116	0.0267728	56947|518|55750|4170|23175	http://amigo.geneontology.org/amigo/term/GO:0005741
hsa-miR-497-5p	GO:0032271	BP	regulation of protein polymerization	Gene Ontology	5	27	0.00503116	0.0267728	10152|9113|585|23189|55243	http://amigo.geneontology.org/amigo/term/GO:0032271
hsa-miR-497-5p	GO:0008289	MF	lipid binding	Gene Ontology	11	115	0.00527459	0.0280046	10857|1173|311|139285|56603|51429|8904|57154|6095|889|1901	http://amigo.geneontology.org/amigo/term/GO:0008289
hsa-miR-497-5p	GO:0016788	MF	hydrolase activity, acting on ester bonds	Gene Ontology	12	132	0.00531353	0.0281794	127018|51559|283106|51400|54913|22908|28987|8611|55589|5537|57406|11261	http://amigo.geneontology.org/amigo/term/GO:0016788
hsa-miR-497-5p	GO:0005774	CC	vacuolar membrane	Gene Ontology	8	68	0.00544484	0.0287295	53373|3920|4891|10670|51449|523|91056|92979	http://amigo.geneontology.org/amigo/term/GO:0005774
hsa-miR-497-5p	GO:0051640	BP	organelle localization	Gene Ontology	8	68	0.00544484	0.0287295	3916|51199|9527|6814|1778|9928|23277|3799	http://amigo.geneontology.org/amigo/term/GO:0051640
hsa-miR-497-5p	GO:0070482	BP	response to oxygen levels	Gene Ontology	7	54	0.00568303	0.0298518	5728|1026|57085|8453|6383|3673|54583	http://amigo.geneontology.org/amigo/term/GO:0070482
hsa-miR-497-5p	GO:0007423	BP	sensory organ development	Gene Ontology	9	84	0.00574733	0.0299374	585|6299|490|56603|3065|25836|6899|64919|50937	http://amigo.geneontology.org/amigo/term/GO:0007423
hsa-miR-497-5p	GO:0051174	BP	regulation of phosphorus metabolic process	Gene Ontology	18	243	0.00579478	0.0299374	1738|9261|55291|7320|142679|998|10270|4088|5144|4296|23523|161742|9618|116496|11200|51719|120892|2254	http://amigo.geneontology.org/amigo/term/GO:0051174
hsa-miR-497-5p	GO:0051817	BP	modification of morphology or physiology of other organism involved in symbiotic interaction	Gene Ontology	4	17	0.00579516	0.0299374	4088|10318|3643|9367	http://amigo.geneontology.org/amigo/term/GO:0051817
hsa-miR-497-5p	GO:1905039	BP	carboxylic acid transmembrane transport	Gene Ontology	5	28	0.00575943	0.0299374	10166|208|10560|6510|4735	http://amigo.geneontology.org/amigo/term/GO:1905039
hsa-miR-497-5p	GO:2001242	BP	regulation of intrinsic apoptotic signaling pathway	Gene Ontology	5	28	0.00575943	0.0299374	10105|51588|4170|10625|754	http://amigo.geneontology.org/amigo/term/GO:2001242
hsa-miR-497-5p	GO:0006487	BP	protein N-linked glycosylation	Gene Ontology	4	17	0.00579516	0.0299374	6482|1650|7327|957	http://amigo.geneontology.org/amigo/term/GO:0006487
hsa-miR-497-5p	GO:0032479	BP	regulation of type I interferon production	Gene Ontology	4	17	0.00579516	0.0299374	10621|4791|1654|1660	http://amigo.geneontology.org/amigo/term/GO:0032479
hsa-miR-497-5p	GO:0035567	BP	non-canonical Wnt signaling pathway	Gene Ontology	5	28	0.00575943	0.0299374	22881|7074|64750|8323|192669	http://amigo.geneontology.org/amigo/term/GO:0035567
hsa-miR-497-5p	GO:0043197	CC	dendritic spine	Gene Ontology	4	17	0.00579516	0.0299374	4082|83992|5499|10564	http://amigo.geneontology.org/amigo/term/GO:0043197
hsa-miR-497-5p	GO:0045931	BP	positive regulation of mitotic cell cycle	Gene Ontology	4	17	0.00579516	0.0299374	80174|3643|26057|5048	http://amigo.geneontology.org/amigo/term/GO:0045931
hsa-miR-497-5p	GO:0072401	BP	signal transduction involved in DNA integrity checkpoint	Gene Ontology	3	8	0.00591342	0.0300513	1026|7311|5527	http://amigo.geneontology.org/amigo/term/GO:0072401
hsa-miR-497-5p	GO:0000726	BP	non-recombinational repair	Gene Ontology	3	8	0.00591342	0.0300513	51444|3981|3014	http://amigo.geneontology.org/amigo/term/GO:0000726
hsa-miR-497-5p	GO:0006096	BP	glycolytic process	Gene Ontology	3	8	0.00591342	0.0300513	226|405|3643	http://amigo.geneontology.org/amigo/term/GO:0006096
hsa-miR-497-5p	GO:0031103	BP	axon regeneration	Gene Ontology	3	8	0.00591342	0.0300513	5604|9469|1495	http://amigo.geneontology.org/amigo/term/GO:0031103
hsa-miR-497-5p	GO:0034212	MF	peptide N-acetyltransferase activity	Gene Ontology	3	8	0.00591342	0.0300513	122830|1386|80018	http://amigo.geneontology.org/amigo/term/GO:0034212
hsa-miR-497-5p	GO:0043094	BP	cellular metabolic compound salvage	Gene Ontology	3	8	0.00591342	0.0300513	55256|132|8566	http://amigo.geneontology.org/amigo/term/GO:0043094
hsa-miR-497-5p	GO:0072132	BP	mesenchyme morphogenesis	Gene Ontology	3	8	0.00591342	0.0300513	4088|2260|3516	http://amigo.geneontology.org/amigo/term/GO:0072132
hsa-miR-497-5p	GO:1902883	BP	negative regulation of response to oxidative stress	Gene Ontology	3	8	0.00591342	0.0300513	11315|6648|10131	http://amigo.geneontology.org/amigo/term/GO:1902883
hsa-miR-497-5p	GO:1903902	BP	positive regulation of viral life cycle	Gene Ontology	3	8	0.00591342	0.0300513	103|6732|6780	http://amigo.geneontology.org/amigo/term/GO:1903902
hsa-miR-497-5p	GO:0050662	MF	coenzyme binding	Gene Ontology	6	41	0.00607067	0.030767	211|11062|23042|4720|36|3643	http://amigo.geneontology.org/amigo/term/GO:0050662
hsa-miR-497-5p	GO:0042176	BP	regulation of protein catabolic process	Gene Ontology	7	55	0.00621471	0.0314121	5728|7327|51429|2932|998|7514|4953	http://amigo.geneontology.org/amigo/term/GO:0042176
hsa-miR-497-5p	GO:0003735	MF	structural constituent of ribosome	Gene Ontology	5	29	0.00655888	0.0326932	65008|92014|284439|9045|6157	http://amigo.geneontology.org/amigo/term/GO:0003735
hsa-miR-497-5p	GO:0006399	BP	tRNA metabolic process	Gene Ontology	5	29	0.00655888	0.0326932	4677|127253|60528|54913|283459	http://amigo.geneontology.org/amigo/term/GO:0006399
hsa-miR-497-5p	GO:0007163	BP	establishment or maintenance of cell polarity	Gene Ontology	5	29	0.00655888	0.0326932	23332|56603|9053|23189|23255	http://amigo.geneontology.org/amigo/term/GO:0007163
hsa-miR-497-5p	GO:0030097	BP	hemopoiesis	Gene Ontology	10	102	0.00653139	0.0326932	6208|4891|3516|9474|4254|6670|3313|5814|55526|57217	http://amigo.geneontology.org/amigo/term/GO:0030097
hsa-miR-497-5p	GO:0030177	BP	positive regulation of Wnt signaling pathway	Gene Ontology	5	29	0.00655888	0.0326932	441478|259266|139285|2247|10413	http://amigo.geneontology.org/amigo/term/GO:0030177
hsa-miR-497-5p	GO:0061013	BP	regulation of mRNA catabolic process	Gene Ontology	5	29	0.00655888	0.0326932	55802|9261|8021|7311|23112	http://amigo.geneontology.org/amigo/term/GO:0061013
hsa-miR-497-5p	GO:0098858	CC	actin-based cell projection	Gene Ontology	5	29	0.00655888	0.0326932	10152|10788|160|2195|523	http://amigo.geneontology.org/amigo/term/GO:0098858
hsa-miR-497-5p	GO:1901796	BP	regulation of signal transduction by p53 class mediator	Gene Ontology	5	29	0.00655888	0.0326932	1111|26155|28996|3065|204851	http://amigo.geneontology.org/amigo/term/GO:1901796
hsa-miR-497-5p	GO:0007269	BP	neurotransmitter secretion	Gene Ontology	5	29	0.00655888	0.0326932	84258|120892|9783|3312|3749	http://amigo.geneontology.org/amigo/term/GO:0007269
hsa-miR-497-5p	GO:0010942	BP	positive regulation of cell death	Gene Ontology	10	102	0.00653139	0.0326932	1545|596|51588|11200|10921|5601|56259|11315|23370|23087	http://amigo.geneontology.org/amigo/term/GO:0010942
hsa-miR-497-5p	GO:0005764	CC	lysosome	Gene Ontology	9	86	0.00659722	0.0327971	130340|3920|27113|3454|10670|23385|8763|4842|163	http://amigo.geneontology.org/amigo/term/GO:0005764
hsa-miR-497-5p	GO:0007264	BP	small GTPase mediated signal transduction	Gene Ontology	9	86	0.00659722	0.0327971	253980|9258|7074|10890|57569|9639|153020|23189|22836	http://amigo.geneontology.org/amigo/term/GO:0007264
hsa-miR-497-5p	GO:0051239	BP	regulation of multicellular organismal process	Gene Ontology	27	428	0.00681484	0.0337715	5515|3659|3673|23189|9647|259266|1831|8092|2982|9817|56603|8904|64093|64919|23607|9529|64750|10564|11315|160|2551|22849|80031|7311|9921|5814|6050	http://amigo.geneontology.org/amigo/term/GO:0051239
hsa-miR-497-5p	GO:0048593	BP	camera-type eye morphogenesis	Gene Ontology	4	18	0.00688704	0.0340572	28996|9927|6670|50937	http://amigo.geneontology.org/amigo/term/GO:0048593
hsa-miR-497-5p	GO:0031175	BP	neuron projection development	Gene Ontology	12	137	0.00693637	0.034265	127933|27|51517|596|8239|3800|6385|219699|1495|6383|23189|3730	http://amigo.geneontology.org/amigo/term/GO:0031175
hsa-miR-497-5p	GO:0008324	MF	cation transmembrane transporter activity	Gene Ontology	11	120	0.00703091	0.0346699	53373|114134|2040|55244|27032|84102|64116|4644|54433|7355|8645	http://amigo.geneontology.org/amigo/term/GO:0008324
hsa-miR-497-5p	GO:0048666	BP	neuron development	Gene Ontology	14	173	0.00704053	0.0346699	5818|5728|3798|596|1600|5376|653464|285527|6385|5781|54437|5538|9469|80031	http://amigo.geneontology.org/amigo/term/GO:0048666
hsa-miR-497-5p	GO:0018193	BP	peptidyl-amino acid modification	Gene Ontology	14	174	0.00736626	0.0362168	10152|152559|1859|3480|63967|3662|3320|8445|80335|10105|1386|8021|80012|4297	http://amigo.geneontology.org/amigo/term/GO:0018193
hsa-miR-497-5p	GO:0072657	BP	protein localization to membrane	Gene Ontology	7	57	0.00738805	0.0362669	57728|10971|208|79803|23192|90196|9045	http://amigo.geneontology.org/amigo/term/GO:0072657
hsa-miR-497-5p	GO:0003774	MF	motor activity	Gene Ontology	5	30	0.00743291	0.0363551	23255|3831|3800|9126|5048	http://amigo.geneontology.org/amigo/term/GO:0003774
hsa-miR-497-5p	GO:0006109	BP	regulation of carbohydrate metabolic process	Gene Ontology	6	43	0.00744871	0.0363551	5165|208|405|51094|51763|6095	http://amigo.geneontology.org/amigo/term/GO:0006109
hsa-miR-497-5p	GO:0033044	BP	regulation of chromosome organization	Gene Ontology	6	43	0.00744871	0.0363551	9810|9474|9757|25836|9874|10576	http://amigo.geneontology.org/amigo/term/GO:0033044
hsa-miR-497-5p	GO:0060828	BP	regulation of canonical Wnt signaling pathway	Gene Ontology	6	43	0.00744871	0.0363551	1432|3516|441478|5499|120892|8323	http://amigo.geneontology.org/amigo/term/GO:0060828
hsa-miR-497-5p	GO:0045334	CC	clathrin-coated endocytic vesicle	Gene Ontology	3	9	0.00767855	0.0365815	55788|130340|1173	http://amigo.geneontology.org/amigo/term/GO:0045334
hsa-miR-497-5p	GO:0061640	BP	cytoskeleton-dependent cytokinesis	Gene Ontology	3	9	0.00767855	0.0365815	9897|51429|51203	http://amigo.geneontology.org/amigo/term/GO:0061640
hsa-miR-497-5p	GO:0070491	MF	repressing transcription factor binding	Gene Ontology	3	9	0.00767855	0.0365815	6717|11315|55929	http://amigo.geneontology.org/amigo/term/GO:0070491
hsa-miR-497-5p	GO:0120036	BP	plasma membrane bounded cell projection organization	Gene Ontology	15	193	0.00754913	0.0365815	5728|10678|51256|3798|4891|51259|65059|998|23607|688|351|50488|2260|1495|80031	http://amigo.geneontology.org/amigo/term/GO:0120036
hsa-miR-497-5p	GO:0005905	CC	clathrin-coated pit	Gene Ontology	3	9	0.00767855	0.0365815	8905|351|25977	http://amigo.geneontology.org/amigo/term/GO:0005905
hsa-miR-497-5p	GO:0006140	BP	regulation of nucleotide metabolic process	Gene Ontology	3	9	0.00767855	0.0365815	3643|957|5562	http://amigo.geneontology.org/amigo/term/GO:0006140
hsa-miR-497-5p	GO:0007045	BP	cell-substrate adherens junction assembly	Gene Ontology	3	9	0.00767855	0.0365815	23332|3987|1613	http://amigo.geneontology.org/amigo/term/GO:0007045
hsa-miR-497-5p	GO:0031903	CC	microbody membrane	Gene Ontology	3	9	0.00767855	0.0365815	5189|3156|5193	http://amigo.geneontology.org/amigo/term/GO:0031903
hsa-miR-497-5p	GO:0043149	BP	stress fiber assembly	Gene Ontology	3	9	0.00767855	0.0365815	585|51763|22843	http://amigo.geneontology.org/amigo/term/GO:0043149
hsa-miR-497-5p	GO:0048199	BP	vesicle targeting, to, from or within Golgi	Gene Ontology	3	9	0.00767855	0.0365815	55291|5537|3998	http://amigo.geneontology.org/amigo/term/GO:0048199
hsa-miR-497-5p	GO:0051018	MF	protein kinase A binding	Gene Ontology	3	9	0.00767855	0.0365815	2932|9867|10270	http://amigo.geneontology.org/amigo/term/GO:0051018
hsa-miR-497-5p	GO:0071806	BP	protein transmembrane transport	Gene Ontology	3	9	0.00767855	0.0365815	208|9409|4170	http://amigo.geneontology.org/amigo/term/GO:0071806
hsa-miR-497-5p	GO:0098739	BP	import across plasma membrane	Gene Ontology	3	9	0.00767855	0.0365815	208|6542|4735	http://amigo.geneontology.org/amigo/term/GO:0098739
hsa-miR-497-5p	GO:0098916	BP	anterograde trans-synaptic signaling	Gene Ontology	9	88	0.00754032	0.0365815	6780|50488|2932|1741|56122|5048|25769|3312|6623	http://amigo.geneontology.org/amigo/term/GO:0098916
hsa-miR-497-5p	GO:0140029	BP	exocytic process	Gene Ontology	3	9	0.00767855	0.0365815	8867|26258|4218	http://amigo.geneontology.org/amigo/term/GO:0140029
hsa-miR-497-5p	GO:0046903	BP	secretion	Gene Ontology	14	175	0.00770385	0.0366647	3916|54495|84522|2030|4883|5872|9783|5048|5471|5469|26286|55585|5861|2066	http://amigo.geneontology.org/amigo/term/GO:0046903
hsa-miR-497-5p	GO:0030036	BP	actin cytoskeleton organization	Gene Ontology	10	105	0.00782964	0.0371878	4082|585|998|4739|11252|23332|1809|285527|51804|22843	http://amigo.geneontology.org/amigo/term/GO:0030036
hsa-miR-497-5p	GO:0034470	BP	ncRNA processing	Gene Ontology	8	73	0.0079634	0.0377657	3921|84135|51013|27042|6041|131870|3735|6208	http://amigo.geneontology.org/amigo/term/GO:0034470
hsa-miR-497-5p	GO:0044282	BP	small molecule catabolic process	Gene Ontology	7	58	0.00803258	0.038036	217|128|56603|131870|4967|11315|2247	http://amigo.geneontology.org/amigo/term/GO:0044282
hsa-miR-497-5p	GO:0017148	BP	negative regulation of translation	Gene Ontology	4	19	0.00810663	0.0380979	9444|22849|192670|8507	http://amigo.geneontology.org/amigo/term/GO:0017148
hsa-miR-497-5p	GO:0031461	CC	cullin-RING ubiquitin ligase complex	Gene Ontology	4	19	0.00810663	0.0380979	8697|55832|115290|25847	http://amigo.geneontology.org/amigo/term/GO:0031461
hsa-miR-497-5p	GO:0070972	BP	protein localization to endoplasmic reticulum	Gene Ontology	4	19	0.00810663	0.0380979	10890|6208|9045|6157	http://amigo.geneontology.org/amigo/term/GO:0070972
hsa-miR-497-5p	GO:0005793	CC	endoplasmic reticulum-Golgi intermediate compartment	Gene Ontology	4	19	0.00810663	0.0380979	11261|57222|23259|3998	http://amigo.geneontology.org/amigo/term/GO:0005793
hsa-miR-497-5p	GO:0042470	CC	melanosome	Gene Ontology	4	19	0.00810663	0.0380979	6510|55161|2040|23193	http://amigo.geneontology.org/amigo/term/GO:0042470
hsa-miR-497-5p	GO:0051098	BP	regulation of binding	Gene Ontology	6	44	0.00821631	0.0384783	6717|4087|2932|8904|3673|25942	http://amigo.geneontology.org/amigo/term/GO:0051098
hsa-miR-497-5p	GO:0098813	BP	nuclear chromosome segregation	Gene Ontology	6	44	0.00821631	0.0384783	23332|114799|55706|25836|54908|2072	http://amigo.geneontology.org/amigo/term/GO:0098813
hsa-miR-497-5p	GO:0098794	CC	postsynapse	Gene Ontology	6	44	0.00821631	0.0384783	5728|83590|2932|351|2030|57622	http://amigo.geneontology.org/amigo/term/GO:0098794
hsa-miR-497-5p	GO:0016298	MF	lipase activity	Gene Ontology	5	31	0.00838485	0.0391892	1133|378|6609|8439|127018	http://amigo.geneontology.org/amigo/term/GO:0016298
hsa-miR-497-5p	GO:0031329	BP	regulation of cellular catabolic process	Gene Ontology	12	141	0.00849638	0.0396314	154214|1432|167227|4943|5604|1191|25897|22849|8897|957|5599|23545	http://amigo.geneontology.org/amigo/term/GO:0031329
hsa-miR-497-5p	GO:0042326	BP	negative regulation of phosphorylation	Gene Ontology	8	74	0.0085574	0.0397578	22863|2932|51347|5903|7128|5048|10105|120892	http://amigo.geneontology.org/amigo/term/GO:0042326
hsa-miR-497-5p	GO:0048568	BP	embryonic organ development	Gene Ontology	8	74	0.0085574	0.0397578	54583|10413|3200|4087|5604|2020|2260|2071	http://amigo.geneontology.org/amigo/term/GO:0048568
hsa-miR-497-5p	GO:0080135	BP	regulation of cellular response to stress	Gene Ontology	9	90	0.00858292	0.0397974	7074|2932|161742|1111|5604|51588|51776|5601|545	http://amigo.geneontology.org/amigo/term/GO:0080135
hsa-miR-497-5p	GO:0016604	CC	nuclear body	Gene Ontology	7	59	0.00871757	0.0403419	6426|23524|11052|6239|9584|545|9683	http://amigo.geneontology.org/amigo/term/GO:0016604
hsa-miR-497-5p	GO:0000003	BP	reproduction	Gene Ontology	16	216	0.00893364	0.04124	57728|5872|4090|84515|93185|130399|9757|8614|4486|83700|8611|259266|3673|54583|23633|25836	http://amigo.geneontology.org/amigo/term/GO:0000003
hsa-miR-497-5p	GO:0043406	BP	positive regulation of MAP kinase activity	Gene Ontology	6	45	0.00903908	0.0416857	4214|9261|4296|7311|5604|51776	http://amigo.geneontology.org/amigo/term/GO:0043406
hsa-miR-497-5p	GO:0033674	BP	positive regulation of kinase activity	Gene Ontology	9	91	0.00914349	0.0421257	4214|894|4296|9928|5604|2180|112|54956|10818	http://amigo.geneontology.org/amigo/term/GO:0033674
hsa-miR-497-5p	GO:0002478	BP	antigen processing and presentation of exogenous peptide antigen	Gene Ontology	5	32	0.00941794	0.0428241	6890|160|5708|162|163	http://amigo.geneontology.org/amigo/term/GO:0002478
hsa-miR-497-5p	GO:0002684	BP	positive regulation of immune system process	Gene Ontology	12	143	0.00937264	0.0428241	29126|9261|1432|1147|1191|7311|4254|5243|60|8945|26057|60682	http://amigo.geneontology.org/amigo/term/GO:0002684
hsa-miR-497-5p	GO:0003729	MF	mRNA binding	Gene Ontology	4	20	0.00945959	0.0428241	6631|55421|9444|1994	http://amigo.geneontology.org/amigo/term/GO:0003729
hsa-miR-497-5p	GO:0006396	BP	RNA processing	Gene Ontology	13	161	0.00934368	0.0428241	1859|79753|11062|8634|23076|23064|22827|10921|63899|83640|6631|25888|51493	http://amigo.geneontology.org/amigo/term/GO:0006396
hsa-miR-497-5p	GO:0017038	BP	protein import	Gene Ontology	4	20	0.00945959	0.0428241	3320|9409|3920|23633	http://amigo.geneontology.org/amigo/term/GO:0017038
hsa-miR-497-5p	GO:0030234	MF	enzyme regulator activity	Gene Ontology	13	161	0.00934368	0.0428241	831|54956|9459|8439|51400|5573|64744|80119|94134|5601|120892|8131|3730	http://amigo.geneontology.org/amigo/term/GO:0030234
hsa-miR-497-5p	GO:0030705	BP	cytoskeleton-dependent intracellular transport	Gene Ontology	4	20	0.00945959	0.0428241	403|5861|3798|5048	http://amigo.geneontology.org/amigo/term/GO:0030705
hsa-miR-497-5p	GO:0051028	BP	mRNA transport	Gene Ontology	4	20	0.00945959	0.0428241	10921|7514|11269|9908	http://amigo.geneontology.org/amigo/term/GO:0051028
hsa-miR-497-5p	GO:0002687	BP	positive regulation of leukocyte migration	Gene Ontology	4	20	0.00945959	0.0428241	8772|7422|375056|4254	http://amigo.geneontology.org/amigo/term/GO:0002687
hsa-miR-497-5p	GO:0008033	BP	tRNA processing	Gene Ontology	4	20	0.00945959	0.0428241	84705|60528|54913|142940	http://amigo.geneontology.org/amigo/term/GO:0008033
hsa-miR-497-5p	GO:0048770	CC	pigment granule	Gene Ontology	4	20	0.00945959	0.0428241	6520|6184|4673|10015	http://amigo.geneontology.org/amigo/term/GO:0048770
hsa-miR-497-5p	GO:0051082	MF	unfolded protein binding	Gene Ontology	4	20	0.00945959	0.0428241	10845|11080|10131|3301	http://amigo.geneontology.org/amigo/term/GO:0051082
hsa-miR-497-5p	GO:1902493	CC	acetyltransferase complex	Gene Ontology	4	20	0.00945959	0.0428241	60|122830|80018|6879	http://amigo.geneontology.org/amigo/term/GO:1902493
hsa-miR-497-5p	GO:0019953	BP	sexual reproduction	Gene Ontology	11	126	0.00970678	0.0436109	7320|351|8239|10461|3014|5819|4486|83700|5048|57082|55585	http://amigo.geneontology.org/amigo/term/GO:0019953
hsa-miR-497-5p	GO:0004722	MF	protein serine/threonine phosphatase activity	Gene Ontology	3	10	0.00972182	0.0436109	29101|9647|5531	http://amigo.geneontology.org/amigo/term/GO:0004722
hsa-miR-497-5p	GO:0021885	BP	forebrain cell migration	Gene Ontology	3	10	0.00972182	0.0436109	1600|120892|5048	http://amigo.geneontology.org/amigo/term/GO:0021885
hsa-miR-497-5p	GO:0032507	BP	maintenance of protein location in cell	Gene Ontology	3	10	0.00972182	0.0436109	11014|11315|3098	http://amigo.geneontology.org/amigo/term/GO:0032507
hsa-miR-497-5p	GO:0035601	BP	protein deacylation	Gene Ontology	3	10	0.00972182	0.0436109	25836|161742|2005	http://amigo.geneontology.org/amigo/term/GO:0035601
hsa-miR-497-5p	GO:0051208	BP	sequestering of calcium ion	Gene Ontology	3	10	0.00972182	0.0436109	2247|4842|3064	http://amigo.geneontology.org/amigo/term/GO:0051208
hsa-miR-497-5p	GO:0090502	BP	RNA phosphodiester bond hydrolysis, endonucleolytic	Gene Ontology	3	10	0.00972182	0.0436109	284131|60528|54913	http://amigo.geneontology.org/amigo/term/GO:0090502
hsa-miR-497-5p	GO:1903725	BP	regulation of phospholipid metabolic process	Gene Ontology	3	10	0.00972182	0.0436109	22863|2247|998	http://amigo.geneontology.org/amigo/term/GO:1903725
hsa-miR-497-5p	GO:1990837	MF	sequence-specific double-stranded DNA binding	Gene Ontology	10	109	0.00985935	0.0441433	55388|7764|9967|23528|51351|23064|80712|6670|7975|9219	http://amigo.geneontology.org/amigo/term/GO:1990837
hsa-miR-497-5p	GO:0003690	MF	double-stranded DNA binding	Gene Ontology	11	127	0.01022	0.0455375	3065|57649|55509|23064|6934|79365|7975|22893|1386|25942|3720	http://amigo.geneontology.org/amigo/term/GO:0003690
hsa-miR-497-5p	GO:0042493	BP	response to drug	Gene Ontology	13	163	0.0102242	0.0455375	1545|595|6542|6584|1133|1600|518|7514|5781|6879|3673|205|268	http://amigo.geneontology.org/amigo/term/GO:0042493
hsa-miR-497-5p	GO:0045597	BP	positive regulation of cell differentiation	Gene Ontology	11	127	0.01022	0.0455375	22849|1191|8202|5324|998|23064|8772|405|84193|1495|5601	http://amigo.geneontology.org/amigo/term/GO:0045597
hsa-miR-497-5p	GO:0051051	BP	negative regulation of transport	Gene Ontology	7	61	0.0102147	0.0455375	5728|7327|596|11261|11252|6814|130399	http://amigo.geneontology.org/amigo/term/GO:0051051
hsa-miR-497-5p	GO:0032561	MF	guanyl ribonucleotide binding	Gene Ontology	7	61	0.0102147	0.0455375	51715|2768|1968|55341|5631|51209|10139	http://amigo.geneontology.org/amigo/term/GO:0032561
hsa-miR-497-5p	GO:0000082	BP	G1/S transition of mitotic cell cycle	Gene Ontology	5	33	0.0105353	0.0464086	5728|8454|6597|26057|5527	http://amigo.geneontology.org/amigo/term/GO:0000082
hsa-miR-497-5p	GO:0010212	BP	response to ionizing radiation	Gene Ontology	5	33	0.0105353	0.0464086	64326|545|3981|5562|596	http://amigo.geneontology.org/amigo/term/GO:0010212
hsa-miR-497-5p	GO:0043209	CC	myelin sheath	Gene Ontology	5	33	0.0105353	0.0464086	10576|3312|10383|2665|9377	http://amigo.geneontology.org/amigo/term/GO:0043209
hsa-miR-497-5p	GO:0048469	BP	cell maturation	Gene Ontology	5	33	0.0105353	0.0464086	10116|1026|3600|9897|2776	http://amigo.geneontology.org/amigo/term/GO:0048469
hsa-miR-497-5p	GO:0009636	BP	response to toxic substance	Gene Ontology	8	77	0.0105386	0.0464086	6648|10131|23064|518|5601|7128|27244|1147	http://amigo.geneontology.org/amigo/term/GO:0009636
hsa-miR-497-5p	GO:0016458	BP	gene silencing	Gene Ontology	5	33	0.0105353	0.0464086	3070|23511|3159|55766|3014	http://amigo.geneontology.org/amigo/term/GO:0016458
hsa-miR-497-5p	GO:0033209	BP	tumor necrosis factor-mediated signaling pathway	Gene Ontology	5	33	0.0105353	0.0464086	8793|5708|3875|204851|1147	http://amigo.geneontology.org/amigo/term/GO:0033209
hsa-miR-497-5p	GO:0051648	BP	vesicle localization	Gene Ontology	5	33	0.0105353	0.0464086	1780|10959|9527|3799|23243	http://amigo.geneontology.org/amigo/term/GO:0051648
hsa-miR-497-5p	GO:0006364	BP	rRNA processing	Gene Ontology	6	47	0.0108583	0.0476148	7311|28987|26168|6157|6208|54913	http://amigo.geneontology.org/amigo/term/GO:0006364
hsa-miR-497-5p	GO:0018108	BP	peptidyl-tyrosine phosphorylation	Gene Ontology	6	47	0.0108583	0.0476148	10152|25998|10645|7422|2247|2066	http://amigo.geneontology.org/amigo/term/GO:0018108
hsa-miR-497-5p	GO:0098589	CC	membrane region	Gene Ontology	6	47	0.0108583	0.0476148	3667|64750|351|285704|4842|1901	http://amigo.geneontology.org/amigo/term/GO:0098589
hsa-miR-497-5p	GO:1903749	BP	positive regulation of establishment of protein localization to mitochondrion	Gene Ontology	4	21	0.0109512	0.0478877	5599|79753|85465|89978	http://amigo.geneontology.org/amigo/term/GO:1903749
hsa-miR-497-5p	GO:0005198	MF	structural molecule activity	Gene Ontology	9	94	0.0109918	0.0479984	5357|23607|26958|23511|3875|203068|284439|7431|291	http://amigo.geneontology.org/amigo/term/GO:0005198
hsa-miR-497-5p	GO:0031966	CC	mitochondrial membrane	Gene Ontology	10	111	0.0110135	0.048048	51805|5832|4711|92259|100505876|84233|255488|26515|9927|291	http://amigo.geneontology.org/amigo/term/GO:0031966
hsa-miR-497-5p	GO:0000785	CC	chromatin	Gene Ontology	7	62	0.0110296	0.0480511	4152|23466|6603|3659|3065|11339|26057	http://amigo.geneontology.org/amigo/term/GO:0000785
hsa-miR-497-5p	GO:0031224	CC	intrinsic component of membrane	Gene Ontology	45	843	0.0111282	0.0484357	54495|84894|51094|286148|58477|283659|220002|11118|26503|7841|7049|5193|51599|56122|55572|2030|55238|9883|1138|221710|3749|54207|64116|4254|259295|113444|7106|9213|5101|57089|57406|27112|10195|388630|55161|8879|94103|25897|162073|1362|351|285704|10618|154091|9927	http://amigo.geneontology.org/amigo/term/GO:0031224
hsa-miR-497-5p	GO:0007399	BP	nervous system development	Gene Ontology	22	342	0.0111841	0.0486338	84894|60|5601|6538|23064|1191|1967|7431|4967|8904|10818|5781|1495|10247|7337|22849|4644|9928|378|2020|84233|57622	http://amigo.geneontology.org/amigo/term/GO:0007399
hsa-miR-497-5p	GO:0051707	BP	response to other organism	Gene Ontology	15	203	0.0113319	0.049231	4691|3916|4953|2040|596|5144|3516|55421|5648|9181|9213|8357|23087|4842|129607	http://amigo.geneontology.org/amigo/term/GO:0051707

## Sheet: TableS5.2
Table S5.2 The enriched GO terms of targets of 4 A-to-I edited miRNAs. Targets that only belong to the edited miRNAs were extracted from Table S4. The calculation procedures and criteria were the same as those in Table S5.1.
miRNA	go_id	Ontology	Term	Database	Input_num	Background_num	P_Value	Corrected_P_Value	Input	Hyperlink
hsa-mir-1251_10g	GO:0005654	CC	nucleoplasm	Gene Ontology	29	474	2.89112e-12	2.61309e-09	2077|132660|2802|51535|118|51244|7159|5706|5784|8570|157313|9898|56987|51386|29089|5757|51701|22985|904|54968|6502|26610|2002|8899|9967|10776|11103|55832|8091	http://amigo.geneontology.org/amigo/term/GO:0005654
hsa-mir-1251_10g	GO:0044237	BP	cellular metabolic process	Gene Ontology	58	1718	2.45236e-12	2.61309e-09	494115|6830|124997|10992|168374|9014|162972|6121|7343|8019|6626|401505|51535|8266|8323|7368|22992|11179|29959|1612|4820|10914|27161|9870|55236|79685|7733|25942|10956|56252|26039|3837|55251|2932|9113|9520|6305|9841|5757|7384|7182|22978|11143|7730|4171|81887|8553|4664|9665|83903|340485|8815|9967|84836|84706|80014|3987|3981	http://amigo.geneontology.org/amigo/term/GO:0044237
hsa-mir-1251_10g	GO:0043170	BP	macromolecule metabolic process	Gene Ontology	51	1440	1.12041e-11	7.595e-09	7812|4893|9097|65981|7343|22937|55699|9306|90843|10793|3214|27316|140890|5822|54858|96459|11016|10725|389856|23394|10425|220213|287|84250|3837|678|54676|11143|57474|8202|10172|10721|8668|109|51780|53981|4171|4174|868|7705|22985|29089|4664|79035|51645|10776|144983|649|51126|8725|91445	http://amigo.geneontology.org/amigo/term/GO:0043170
hsa-mir-1251_10g	GO:0043226	CC	organelle	Gene Ontology	63	2086	2.4649e-11	1.33672e-08	261729|2649|571|55249|168374|348654|9014|7798|25886|7757|140775|2335|394|9331|51535|9320|55917|7368|4690|6785|7203|54856|79685|64801|401505|56987|9967|2033|3652|64328|51385|29916|6307|25942|10956|26054|5781|54892|55252|57474|8202|10172|10766|10721|133686|23099|7644|8266|157313|163|84250|9422|10845|8446|83903|27316|471|205717|2023|8725|29922|9557|1660	http://amigo.geneontology.org/amigo/term/GO:0043226
hsa-mir-1251_10g	GO:0090304	BP	nucleic acid metabolic process	Gene Ontology	36	811	4.44691e-11	2.00963e-08	6830|65981|7343|22937|9994|121536|10793|10971|90268|22992|11179|24149|5784|25920|27161|7733|5706|51018|115426|54439|5557|8570|8886|51780|6619|4174|10923|11143|7161|3981|51645|378|6310|144983|649|4288	http://amigo.geneontology.org/amigo/term/GO:0090304
hsa-mir-1251_10g	GO:0043231	CC	intracellular membrane-bounded organelle	Gene Ontology	53	1606	5.29484e-11	2.051e-08	65095|3636|3619|571|348654|65981|7798|117608|55832|7871|22937|23369|64328|200185|5822|6785|206358|64745|4288|221477|6305|7757|528|84307|57798|10956|678|56987|10172|11016|2932|6992|133686|55033|109|5469|53981|5045|115426|22985|51018|113115|90441|8091|6790|51271|26610|64172|23160|90861|54439|8886|7343	http://amigo.geneontology.org/amigo/term/GO:0043231
hsa-mir-1251_10g	GO:0031323	BP	regulation of cellular metabolic process	Gene Ontology	39	969	1.06497e-10	3.39726e-08	27148|571|65981|23228|2335|4610|23369|55127|10793|51714|8091|10845|55137|11179|1612|5784|5781|56257|25942|528|85403|6992|115426|90233|6619|5187|7705|22985|6790|3399|6502|1981|222658|84307|2002|4664|115416|649|79685	http://amigo.geneontology.org/amigo/term/GO:0031323
hsa-mir-1251_10g	GO:0043227	CC	membrane-bounded organelle	Gene Ontology	59	2030	4.74892e-10	1.35544e-07	8553|55500|10992|54471|123920|5520|9329|140775|10575|4610|23369|10479|8323|4040|7159|22974|5500|2222|64801|24149|27161|7417|6305|23399|26057|7555|3837|30844|55033|256987|81887|7398|63929|5203|109|23411|80777|8125|115426|117608|90441|56886|4811|7705|5557|11143|904|4528|85477|2319|79035|7699|8934|6310|205717|54856|8668|57380|84064	http://amigo.geneontology.org/amigo/term/GO:0043227
hsa-mir-1251_10g	GO:0016043	BP	cellular component organization	Gene Ontology	37	936	5.25855e-10	1.35796e-07	6830|94239|4893|5520|10425|7368|4690|5822|22992|7159|96459|22974|64801|813|9897|27161|55236|8841|25942|528|287|55764|146909|8202|5557|5187|4174|56910|4811|128637|2271|22985|1975|79035|8815|2023|9557	http://amigo.geneontology.org/amigo/term/GO:0016043
hsa-mir-1251_10g	GO:0006807	BP	nitrogen compound metabolic process	Gene Ontology	49	1541	9.91117e-10	2.33688e-07	55182|571|54708|22870|8019|90843|285203|7203|54856|11179|10992|25983|389856|56257|8841|374378|25942|2077|64172|3837|8085|57474|51385|126375|142891|81887|133686|23099|6305|51701|79834|8125|148213|79699|7730|25976|8899|7705|5634|11103|727936|51645|55137|8815|3845|2023|51126|6257|79685	http://amigo.geneontology.org/amigo/term/GO:0006807
hsa-mir-1251_10g	GO:1901360	BP	organic cyclic compound metabolic process	Gene Ontology	37	971	1.36873e-09	2.96906e-07	9097|55206|65981|117608|84836|64062|10575|9994|10793|5432|1635|8091|54856|4288|10992|25983|56257|4863|9422|57798|3837|10172|8202|133686|29089|109|8570|11103|1975|26610|55127|51645|23160|471|3987|29922|1660	http://amigo.geneontology.org/amigo/term/GO:1901360
hsa-mir-1251_10g	GO:0043233	CC	organelle lumen	Gene Ontology	31	725	2.41786e-09	4.68288e-07	65095|54477|9014|55791|7343|84836|11222|5500|5250|55137|8886|5784|7417|5706|57798|10725|81887|5757|226|6619|56886|868|339230|54968|79035|10923|10808|80298|3981|9557|1660	http://amigo.geneontology.org/amigo/term/GO:0043233
hsa-mir-1251_10g	GO:0005737	CC	cytoplasm	Gene Ontology	50	1641	2.59591e-09	4.69253e-07	114625|9118|80777|9320|123920|7871|2335|23369|80298|5500|5432|4690|1635|55571|22974|5706|80143|2222|2033|55236|10766|4863|813|10956|64172|7555|586|55374|9331|23394|55251|51386|144983|84272|399512|5824|10845|3987|4171|1975|2896|26031|64745|3845|7994|8668|51126|10807|29916|9557	http://amigo.geneontology.org/amigo/term/GO:0005737
hsa-mir-1251_10g	GO:0005488	MF	binding	Gene Ontology	61	2247	2.94075e-09	4.98365e-07	9113|85865|10659|55500|3925|285172|348654|56910|5469|23228|22870|7871|22937|11057|6626|9632|4552|118|8323|5357|1635|8091|55137|5500|25983|11222|2033|7417|1399|4863|27148|10956|26031|7555|586|5432|55252|10725|10172|11016|109|23385|55861|5824|6619|4351|10425|56886|51701|29916|6790|8899|4528|6502|79817|2671|10808|11103|3987|3981|84064	http://amigo.geneontology.org/amigo/term/GO:0005488
hsa-mir-1251_10g	GO:0018130	BP	heterocycle biosynthetic process	Gene Ontology	30	707	5.20127e-09	7.47491e-07	65981|4610|51535|90843|9994|8323|7203|11016|6310|23394|8841|27148|57798|10725|10172|8202|23099|9841|5757|1952|5469|6619|4733|11143|7161|2002|96459|5706|7182|3981	http://amigo.geneontology.org/amigo/term/GO:0018130
hsa-mir-1251_10g	GO:0051252	BP	regulation of RNA metabolic process	Gene Ontology	27	582	5.23781e-09	7.47491e-07	571|55249|65981|55832|4610|90843|121536|5706|9422|24149|5784|10914|26039|7733|7551|25942|678|57474|8202|9841|6619|83744|26610|2002|378|80014|6257	http://amigo.geneontology.org/amigo/term/GO:0051252
hsa-mir-1251_10g	GO:1903506	BP	regulation of nucleic acid-templated transcription	Gene Ontology	26	549	6.76718e-09	9.17461e-07	494115|162972|168374|65981|55832|4610|51535|9994|121536|27107|56257|100529215|7730|2077|84307|84458|117608|8553|9841|7551|90268|85403|9967|3845|2023|132660	http://amigo.geneontology.org/amigo/term/GO:1903506
hsa-mir-1251_10g	GO:0031974	CC	membrane-enclosed lumen	Gene Ontology	29	697	1.42113e-08	1.83495e-06	65095|94239|54477|348654|8446|55500|8125|64328|140890|22992|79685|25983|157313|5706|2649|10725|51386|5045|10845|56886|51701|22985|79035|8815|55791|54439|7182|8886|9557	http://amigo.geneontology.org/amigo/term/GO:0031974
hsa-mir-1251_10g	GO:0043229	CC	intracellular organelle	Gene Ontology	52	1863	2.0487e-08	2.52502e-06	84836|56252|55791|22870|8019|2802|81545|4552|80298|10923|5250|51244|950|55299|25983|5784|25920|7417|1399|7733|100529215|27148|528|85403|287|5781|57798|54676|30844|10725|285203|2335|6305|7644|226|5045|9897|10425|51018|2671|339230|22985|6790|29089|6502|63934|26057|2002|378|7994|649|54856	http://amigo.geneontology.org/amigo/term/GO:0043229
hsa-mir-1251_10g	GO:0008152	BP	metabolic process	Gene Ontology	49	1706	2.31177e-08	2.65104e-06	9341|56987|9014|22870|9169|64062|9306|10793|3214|1537|84976|6574|7203|54856|4288|1612|25983|4351|55763|389856|23394|10766|8841|7551|23399|56252|90268|117608|57474|51386|10721|142891|6992|23099|81887|3845|23411|6619|374378|7272|5634|6257|79035|51645|471|10776|2023|8668|8725	http://amigo.geneontology.org/amigo/term/GO:0008152
[truncated: 715 more rows]

## Sheet: TableS5.3
Table S5.3 The enriched KEGG pathways of targets of 4 selected miRNAs. Targets that only belong to the original miRNA were extracted from Table S4. The enriched KEGG pathways were calculated using KOBAS2 and the KEGG pathways with Corrected_P_value smaller than 0.05 were listed here.
[truncated: 232 more rows]

[truncated: 1 more sheets: TableS5.4]
