# Supplementary material for: Characterizing Relevant MicroRNA Editing Sites in Parkinson’s Disease
Source: Cells. 2022 Dec 24;12(1):75. doi: 10.3390/cells12010075 (PMC9818192; doi:10.3390/cells12010075)
Supplement: Supplementary file 1 [file cells-12-00075-s001.zip › TableS6_primer.xlsx]

## Sheet: Sheet1
The β-actin was used as an endogenous control gene with the following primer sequences
PCR primer sequences	forward (5'-3')	reverse (5'-3')
β-actin	5'-CTCCATCCTGGCCTCGCTGT-3'	5'-GCTGTCACCTTCACCGTTCC-3'
OPA1	5'-TGTGAGGTCTGCCAGTCTTTA-3'	5'-TGTCCTTAATTGGGGTCGTTG-3'
VAPB	5'- TGTTTCAATGCCACTCCTT-3'	5'- AGTTGCCCGATTTAACCTC-3'
