# Supplementary material for: Characterizing Relevant MicroRNA Editing Sites in Parkinson’s Disease
Source: Cells. 2022 Dec 24;12(1):75. doi: 10.3390/cells12010075 (PMC9818192; doi:10.3390/cells12010075)
Supplement: Supplementary file 1 [file cells-12-00075-s001.zip › TableS7_Fig1-source-data-2021-10-20.xlsx]

## Sheet: Fig. 1a
The categories of signicant M/E sites in miRNAs. Eight categories of miRNA editing were detected by the MiRME algorithm and examined manually. Numbers and IDs are display in this tables (see the details in Table S2.1).
Category		Editing_Sites_ID	number_of_editing_sites	Total	Percentage
3'-A	3'-A	hsa-mir-148a_67_U_a;hsa-mir-338_27_G_-;hsa-mir-409_68_U_a;hsa-mir-124-1_75_G_a;hsa-mir-101-2_70_G_a;hsa-mir-502_74_G_a;hsa-mir-152_75_G_a;hsa-mir-495_72_U_a;hsa-mir-22_75_U_a;hsa-mir-124-1_75_G_-;hsa-mir-212_91_C_a;hsa-mir-28_77_G_a;hsa-mir-339_72_G_a;hsa-mir-23b_81_G_a;hsa-mir-3200_76_C_a;hsa-mir-539_71_U_a;hsa-mir-935_79_C_a;hsa-mir-130b_73_C_a;hsa-mir-124-2_84_G_a;hsa-mir-219a-2_84_G_a;hsa-mir…	187	377	0.438372
	3'-A before central loop	hsa-mir-151a_33_U_a;hsa-mir-338_27_G_a;hsa-mir-139_30_G_a;hsa-let-7i_29_G_a;hsa-mir-29c_37_C_a;hsa-mir-195_37_C_a;hsa-mir-744_33_G_a;hsa-mir-340_38_G_a;hsa-mir-128-1_36_G_a;hsa-mir-1224_24_U_a;hsa-mir-149_39_U_a;hsa-mir-345_40_G_a;hsa-mir-140_46_U_a;hsa-mir-20a_31_U_a;hsa-mir-34c_36_U_a;hsa-mir-7-1_48_U_a;hsa-mir-9-3_40_U_a;hsa-mir-15a_36_G_a;hsa-mir-497_46_C_a;hsa-mir-181d_60_G_a;hsa-let-7f-1_30…	190
3'-U	3'-U	hsa-let-7e_74_C_u;hsa-mir-139_66_A_u;hsa-mir-9-3_78_G_u;hsa-mir-124-1_75_G_u;hsa-mir-210_89_C_u;hsa-mir-28_77_G_u;hsa-mir-493_78_G_u;hsa-mir-101-2_70_G_u;hsa-mir-200b_80_G_u;hsa-mir-935_79_C_u;hsa-mir-130b_73_C_u;hsa-mir-136_72_C_u;hsa-mir-221_88_A_u;hsa-mir-143_84_G_u;hsa-mir-340_81_A_u;hsa-mir-30e_80_C_u;hsa-mir-873_68_A_u;hsa-mir-1180_63_C_u;hsa-mir-320a_70_A_u;hsa-let-7b_80_C_u;hsa-mir-574_82…	215	359	0.417442
	3'-U before central loop	hsa-mir-338_27_G_u;hsa-mir-139_30_G_u;hsa-let-7i_29_G_u;hsa-mir-145_40_A_u;hsa-mir-181c_51_G_u;hsa-mir-195_37_C_u;hsa-mir-744_33_G_u;hsa-mir-138-2_33_A_u;hsa-mir-106a_36_C_u;hsa-mir-340_38_G_u;hsa-mir-150_38_C_u;hsa-mir-345_40_G_u;hsa-mir-129-2_35_C_u;hsa-mir-770_44_A_u;hsa-mir-15a_36_G_u;hsa-mir-129-1_25_C_u;hsa-mir-671_52_G_u;hsa-mir-497_46_C_u;hsa-mir-181d_60_G_u;hsa-mir-199a-2_54_A_u;hsa-mir-…	143
	3'-U;limited reads	hsa-mir-7-3_90_A_u	1
3'-Other	3'-Other	hsa-mir-137_81_G_c;hsa-mir-101-2_69_A_c;hsa-mir-654_71_U_c;hsa-mir-22_76_G_c;hsa-let-7d_83_U_c;hsa-mir-323b_71_U_c;hsa-mir-375_61_A_g;hsa-mir-130a_76_U_c;hsa-mir-222_93_U_c;hsa-mir-501_72_U_c;hsa-mir-27b_83_C_g;hsa-mir-128-2_74_C_g;hsa-mir-29a_63_A_g;hsa-mir-125b-2_38_A_g;hsa-mir-153-2_74_C_g;hsa-mir-433_85_U_g;hsa-mir-29a_64_U_g;hsa-mir-1180_62_U_g;hsa-mir-329-1_70_U_c;hsa-mir-128-1_71_U_c;hsa-m…	32	47	0.0546512
	3'-Other before central lOOp	hsa-let-7c_33_U_g;hsa-mir-34c_36_U_c;hsa-mir-7-1_48_U_g;hsa-mir-150_38_C_g;hsa-mir-181a-1_23_G_c;hsa-mir-125b-1_36_A_g;hsa-mir-10a_45_U_g;hsa-mir-26a-2_36_G_-;hsa-mir-125a_38_A_g;hsa-mir-138-2_34_C_g;hsa-mir-138-2_34_C_-;hsa-mir-7-3_55_C_g;hsa-mir-134_30_C_-;hsa-mir-21_31_U_c;hsa-mir-204_54_U_g	15
5'	5', -1	hsa-let-7c_10_U_c;hsa-let-7f-2_7_A_c;hsa-mir-181c_26_G_c;hsa-let-7d_7_A_c;hsa-mir-21_7_G_c;hsa-mir-103a-2_47_A_c;hsa-mir-26b_11_G_c;hsa-mir-98_21_G_c;hsa-let-7a-3_3_G_c;hsa-mir-181a-2_38_G_c;hsa-mir-27b_60_G_c;hsa-let-7a-1_5_A_c;hsa-let-7b_5_G_c;hsa-let-7a-2_4_U_c;hsa-let-7f-1_6_G_c;hsa-mir-103a-1_47_A_c;hsa-mir-26a-2_13_A_c;hsa-mir-125a_14_G_c;hsa-mir-100_12_A_c	19	23	0.0267442
	5',-1 position	hsa-mir-22_52_A_c	1
	5', -2	hsa-mir-4454_1_C_u;hsa-mir-101-1_45_G_c	2
	5',-2 position	hsa-mir-101-2_47_G_c	1
A-to-I(G)	A-to-I(G)	hsa-mir-497_83_A_g;hsa-mir-376a-1_9_A_g;hsa-mir-381_52_A_g;hsa-mir-589_66_A_g;hsa-mir-625_58_A_g;hsa-mir-1260b_18_A_g;hsa-mir-7977_6_A_g;hsa-mir-379_10_A_g;hsa-mir-376c_48_A_g;hsa-mir-130b_71_A_g;hsa-mir-377_54_A_g;hsa-mir-539_18_A_g;hsa-mir-664a_18_A_g;hsa-mir-381_55_A_g;hsa-mir-301b_64_A_g;hsa-mir-376a-2_55_A_g;hsa-mir-337_66_A_g;hsa-let-7a-2_28_A_g;hsa-mir-1251_10_A_g;hsa-mir-411_20_A_g;hsa-mi…	23	23	0.0267442
C-to-U	C-to-U	hsa-mir-3653_42_C_u;hsa-mir-125b-1_25_C_u;hsa-mir-125b-2_27_C_u;hsa-mir-219a-2_33_C_u	4	4	0.00465116
Other	other	hsa-mir-1260a_22_U_g;hsa-mir-26a-1_8_C_g;hsa-mir-331_80_A_-;hsa-mir-26a-1_9_G_-	4	4	0.00465116
SNP	SNP rs10934682	hsa-mir-544b_27_U_g	1	14	0.0162791
	SNP rs1222288190	hsa-mir-4662a_28_C_a	1
	SNP rs12402181	hsa-mir-3117_49_G_a	1
	SNP rs1291197356	hsa-mir-143_50_A_u	1
	SNP rs1382485035	hsa-mir-758_74_C_u	1
	SNP rs2155248	hsa-mir-1304_65_C_a	1
	SNP rs370719000	hsa-mir-26a-1_9_G_c	1
	SNP rs66683138	hsa-mir-3622a_21_G_a	1
	SNP rs72996752	hsa-mir-4999_29_U_c	1
	SNP rs750550938	hsa-mir-943_76_C_u	1
	SNP rs752742190	hsa-mir-23b_81_G_u	1
	SNP rs766631753	hsa-mir-6511b-1_77_C_u	1
	SNP rs782515496	hsa-mir-98_101_C_u	1
	SNP rs965039743	hsa-mir-2277_42_A_u	1
Pseudo	pseudo	hsa-mir-9-3_78_G_a;hsa-mir-151b_80_A_u;hsa-mir-27a_69_C_u;hsa-mir-320b-1_59_A_g;hsa-mir-129-1_68_U_c;hsa-mir-320b-2_92_A_g;hsa-mir-23c_79_U_g;hsa-mir-181d_47_U_c;hsa-mir-107_71_C_g	9	9	0.0104651
Sum			860	860	1

## Sheet: Fig. 1b
The numbers of different types of editing events that have signifcant Spearman correlation ρ with the ages in the PC and PD-PC samples. The Spearman correlation and P-value between the editing levels and sample ages (for PC or PD-PC, respectively) were calculated with the corr function in MATLAB. The sites with Pvalue smaller than 0.05 were considered as being significantly correlated with age.
editing categories	all-PC	all-PD-PC	positive-PC	positive-PD-PC	negative-PC	negative-PD-PC
3'-A	112	34	90	31	22	3
3'-Other	14	1	4	0	10	1
3'-U	78	23	35	2	43	21
5'	9	0	5	0	4	0
A-to-I(G)	4	1	3	0	1	1
C-to-U	2	0	0	0	2	0
pseudo	6	0	1	0	5	0
SNP	2	1	1	1	1	0

## Sheet: Fig. 1c
The Spearman correlation (ρ) between the editing levels of A-to-I and C-to-U editing sites and ages of the PC and PD-PC samples, respectively. The editing levels of M/E sites were retrieved from Table S2.1. The Spearman correlation and P-value between editing levels and ages for the sames in PC or PD-PC were calculated with the corr function in MatLab, respectively.
Edit_site	miRNA	ME_Position_in_PremiR	WT_Nucl	ME_Nucl	miR_Chr	miR_Strand	PremiR_Start	PremiR_End	ME_Genome_Position	5'_Mature_Start	5'_Mature_End	3'_Mature_Start	3'_Mature_End	ME_Category_Manual	correlation between PC and PC age	pvalue of the correlation between PC and PC age	FDR	correlation between PD-PC and PD-PC age	pvalue of the correlation between PD-PC and PD-PC age	FDR	SRR1759212	SRR1759213	SRR1759214	SRR1759215	SRR1759216	SRR1759217	SRR1759218	SRR1759219	SRR1759220	SRR1759221	SRR1759222	SRR1759223	SRR1759224	SRR1759225	SRR1759226	SRR1759227	SRR1759228	SRR1759229	SRR1759230	SRR1759231	SRR1759232	SRR1759233	SRR1759234	SRR1759235	SRR1759236	SRR1759237	SRR1759238	SRR1759239	SRR1759240
hsa-mir-376a-2_55_A_g	hsa-mir-376a-2 MI0003529 [80 bases, B366137] [80 bases, B366137] [80 bases, B366137] [80 bases, B366137] [80 bases, B366137] [80 [80 bases, B366137]	55	A	g	chr14	+	101040069	101040148	101040123	101040080	101040100	101040118	101040138	A-to-I(G)	0.296148	0.0794713	0.255975	-0.367849	0.0496175	0.633823	0.826	0.891	0.895	0.816	0.843	0.9	0.842	0.837	0.857	0.902	0.889	0.892	0.897	0.837	0.848	0.86	0.8	0.903	0.81	0.784	0.827	0.902	0.919	0.867	0.814	0.855	0.88	0.905	0.838
hsa-mir-1251_10_A_g	hsa-mir-1251 MI0006386 [70 bases, 179C0DC8] [70 bases, 179C0DC8] [70 bases, 179C0DC8] [70 bases, 179C0DC8] [70 bases, 179C0DC8] [70 bases, 179C0DC8]	10	A	g	chr12	+	97491909	97491978	97491918	97491913	97491933	97491951	97491971	A-to-I(G)	0.200618	0.240714	0.491372	0.33605	0.0746961	0.633823	0.16	0.139	0.121	0.118	0.094	0.078	0.157	0.159	0.067	0.075	0.139	0.169	0.087	0.104	0.114	0.05	0.103	0.081	0.25	0.203	0.082	0.11	0.2	0.228	0.109	0.108	0.096	0.086	0.103
hsa-mir-411_20_A_g	hsa-mir-411 MI0003675 [96 bases, EC0E51C5] [96 bases, EC0E51C5] [96 bases, EC0E51C5] [96 bases, EC0E51C5] [96 bases, EC0E51C5] [ [96 bases, EC0E51C5]	20	A	g	chr14	+	101023325	101023420	101023344	101023340	101023360	101023375	101023396	A-to-I(G)	-0.200799	0.240283	0.491372	0.291276	0.125268	0.685386	0.225	0.223	0.212	0.236	0.227	0.334	0.263	0.206	0.21	0.243	0.261	0.244	0.232	0.24	0.232	0.239	0.239	0.236	0.244	0.247	0.222	0.26	0.247	0.251	0.225	0.241	0.259	0.355	0.261
hsa-mir-376a-1_49_A_g	hsa-mir-376a-1 MI0000784 [68 bases, 1C4C3DF6] [68 bases, 1C4C3DF6] [68 bases, 1C4C3DF6] [68 bases, 1C4C3DF6] [68 bases, 1C4C3DF6 [68 bases, 1C4C3DF6]	49	A	g	chr14	+	101040782	101040849	101040830	101040788	101040809	101040825	101040845	A-to-I(G)	0.285107	0.0919008	0.278107	-0.261584	0.170463	0.74668	0.826	0.891	0.895	0.78	0.843	0.9	0.842	0.837	0.857	0.902	0.805	0.892	0.897	0.837	0.848	0.857	0.8	0.903	0.81	0.784	0.827	0.902	0.918	0.867	0.814	0.852	0.83	0.894	0.796
hsa-mir-376c_48_A_g	hsa-mir-376c MI0000776 [66 bases, 8BA95743] [66 bases, 8BA95743] [66 bases, 8BA95743] [66 bases, 8BA95743] [66 bases, 8BA95743] [66 bases, 8BA95743]	48	A	g	chr14	+	101039690	101039755	101039737	101039694	101039714	101039732	101039752	A-to-I(G)	-0.00251208	0.988399	0.993614	-0.249538	0.191737	0.766746	0.802	0.794	0.793	0.848	0.849	0.8	0.955	0.786	0.795	0.767	0.829	0.839	0.736	0.791	0.702	0.832	0.815	0.807	0.828	0.801	0.874	0.807	0.83	0.835	0.806	0.835	0.818	0.87	0.845
hsa-mir-497_83_A_g	hsa-mir-497 MI0003138 [112 bases, EF2C28FF] [112 bases, EF2C28FF] [112 bases, EF2C28FF] [112 bases, EF2C28FF] [112 bases, EF2C28 [112 bases, EF2C28FF]	83	A	g	chr17	-	7017911	7018022	7017940	7017979	7017999	7017938	7017959	A-to-I(G)	-0.0712261	0.679754	0.844147	-0.219271	0.253102	0.771291	0.87	0.943	0.871	0.923	1	0.944	0.8	0.887	0.87	1	1	0.8	1	0.917	1	0.952	1	0.812	0.909	1	0.926	0.929	0.833	0.923	0.923	0.833	1	0.878	0.963
hsa-mir-625_58_A_g	hsa-mir-625 MI0003639 [85 bases, 6A7510D8] [85 bases, 6A7510D8] [85 bases, 6A7510D8] [85 bases, 6A7510D8] [85 bases, 6A7510D8] [ [85 bases, 6A7510D8]	58	A	g	chr14	+	65471102	65471186	65471159	65471116	65471136	65471153	65471174	A-to-I(G)	0.156155	0.363106	0.617136	-0.212574	0.268248	0.775841	0.114	0.143	0.125	0.103	0.096	0.071	0.068	0.147	0.137	0.227	0.093	0.194	0.231	0.037	0.087	0.094	0.087	0.133	0.105	0.112	0.1	0.125	0.095	0.094	0.107	0.091	0.125	0.134	0.083
hsa-mir-377_54_A_g	hsa-mir-377 MI0000785 [69 bases, 30CD6E39] [69 bases, 30CD6E39] [69 bases, 30CD6E39] [69 bases, 30CD6E39] [69 bases, 30CD6E39] [ [69 bases, 30CD6E39]	54	A	g	chr14	+	101062050	101062118	101062103	101062056	101062077	101062094	101062115	A-to-I(G)	-0.26625	0.116507	0.327438	-0.197135	0.305359	0.799706	0.103	0.085	0.103	0.117	0.103	0.1	0.073	0.086	0.079	0.148	0.105	0.12	0.111	0.141	0.101	0.142	0.131	0.107	0.167	0.088	0.137	0.16	0.124	0.095	0.151	0.117	0.125	0.09	0.12
hsa-mir-379_10_A_g	hsa-mir-379 MI0000787 [67 bases, 33F3B0] [67 bases, 33F3B0] [67 bases, 33F3B0] [67 bases, 33F3B0] [67 bases, 33F3B0] [67 bases, [67 bases, 33F3B0]	10	A	g	chr14	+	101022066	101022132	101022075	101022071	101022091	101022109	101022130	A-to-I(G)	0.254497	0.134164	0.358895	0.184312	0.338505	0.801323	0.073	0.112	0.082	0.084	0.113	0.095	0.099	0.085	0.077	0.091	0.073	0.055	0.094	0.056	0.061	0.089	0.056	0.072	0.073	0.07	0.06	0.075	0.09	0.09	0.062	0.084	0.076	0.089	0.082
hsa-mir-1301_52_A_g	hsa-mir-1301 MI0003815 [82 bases, D66B4687] [82 bases, D66B4687] [82 bases, D66B4687] [82 bases, D66B4687] [82 bases, D66B4687] [82 bases, D66B4687]	52	A	g	chr2	-	25328640	25328721	25328670	25328689	25328707	25328651	25328674	A-to-I(G)	0.541401	0.000650007	0.0203871	-0.138886	0.472439	0.855471	0.107	0.118	0.095	0.142	0.125	0.135	0.089	0.11	0.094	0.089	0.092	0.075	0.073	0.089	0.042	0.133	0.092	0.131	0.105	0.074	0.103	0.105	0.116	0.105	0.058	0.065	0.085	0.113	0.074
hsa-mir-539_18_A_g	hsa-mir-539 MI0003514 [78 bases, 4267A99B] [78 bases, 4267A99B] [78 bases, 4267A99B] [78 bases, 4267A99B] [78 bases, 4267A99B] [ [78 bases, 4267A99B]	18	A	g	chr14	+	101047321	101047398	101047338	101047329	101047350	101047369	101047390	A-to-I(G)	0.23976	0.159003	0.392005	0.131868	0.495313	0.869179	0.086	0.101	0.138	0.099	0.138	0.201	0.187	0.135	0.117	0.119	0.077	0.115	0.085	0.106	0.108	0.07	0.131	0.139	0.089	0.122	0.074	0.091	0.076	0.11	0.083	0.081	0.152	0.149	0.123
hsa-mir-589_66_A_g	hsa-mir-589 MI0003599 [99 bases, 58E61E44] [99 bases, 58E61E44] [99 bases, 58E61E44] [99 bases, 58E61E44] [99 bases, 58E61E44] [ [99 bases, 58E61E44]	66	A	g	chr7	-	5495819	5495917	5495852	5495873	5495894	5495834	5495857	A-to-I(G)	-0.0322705	0.851787	0.930797	-0.101124	0.601701	0.92003	0.486	0.273	0.462	0.591	0.579	0.231	0.355	0.393	0.182	0.509	0.486	0.4	0.383	0.581	0.341	0.521	0.4	0.486	0.588	0.481	0.475	0.511	0.522	0.545	0.354	0.298	0.429	0.423	0.603
hsa-mir-381_52_A_g	hsa-mir-381 MI0000789 [75 bases, 7393B5AD] [75 bases, 7393B5AD] [75 bases, 7393B5AD] [75 bases, 7393B5AD] [75 bases, 7393B5AD] [ [75 bases, 7393B5AD]	52	A	g	chr14	+	101045920	101045994	101045971	101045927	101045948	101045968	101045989	A-to-I(G)	0.242651	0.153887	0.388101	0.100174	0.605137	0.92003	0.068	0.066	0.052	0.064	0.071	0.113	0.055	0.067	0.063	0.055	0.062	0.057	0.056	0.062	0.052	0.071	0.06	0.053	0.057	0.049	0.053	0.056	0.06	0.065	0.043	0.066	0.064	0.158	0.049
hsa-mir-337_66_A_g	hsa-mir-337 MI0000806 [93 bases, 8DB5AE77] [93 bases, 8DB5AE77] [93 bases, 8DB5AE77] [93 bases, 8DB5AE77] [93 bases, 8DB5AE77] [ [93 bases, 8DB5AE77]	66	A	g	chr14	+	100874493	100874585	100874558	100874515	100874535	100874553	100874574	A-to-I(G)	0.453702	0.00544899	0.0516508	0.0998768	0.606213	0.92003	0.115	0.136	0.244	0.143	0.171	0.133	0.145	0.197	0.091	0.125	0.217	0.125	0.065	0.208	0.071	0.083	0.286	0.16	0.08	0.07	0.088	0.125	0.167	0.094	0.125	0.079	0.245	0.14	0.073
hsa-mir-376a-1_9_A_g	hsa-mir-376a-1 MI0000784 [68 bases, 1C4C3DF6] [68 bases, 1C4C3DF6] [68 bases, 1C4C3DF6] [68 bases, 1C4C3DF6] [68 bases, 1C4C3DF6 [68 bases, 1C4C3DF6]	9	A	g	chr14	+	101040782	101040849	101040790	101040788	101040809	101040825	101040845	A-to-I(G)	0.0511598	0.766986	0.891362	-0.0623997	0.747782	0.957145	0.066	0.072	0.066	0.07	0.071	0.141	0.121	0.071	0.067	0.088	0.096	0.059	0.075	0.092	0.05	0.086	0.134	0.068	0.071	0.086	0.149	0.113	0.07	0.074	0.04	0.067	0.063	0.207	0.058
hsa-mir-381_55_A_g	hsa-mir-381 MI0000789 [75 bases, 7393B5AD] [75 bases, 7393B5AD] [75 bases, 7393B5AD] [75 bases, 7393B5AD] [75 bases, 7393B5AD] [ [75 bases, 7393B5AD]	55	A	g	chr14	+	101045920	101045994	101045974	101045927	101045948	101045968	101045989	A-to-I(G)	0.304152	0.0713091	0.240494	-0.0615901	0.750952	0.957388	0.058	0.056	0.048	0.058	0.06	0.063	0.065	0.064	0.057	0.049	0.051	0.046	0.018	0.05	0.015	0.06	0.052	0.051	0.049	0.041	0.042	0.045	0.059	0.057	0.044	0.055	0.051	0.082	0.055
hsa-mir-7977_6_A_g	hsa-mir-7977 MI0025753 [49 bases, 9751809D] [49 bases, 9751809D] [49 bases, 9751809D] [49 bases, 9751809D] [49 bases, 9751809D] [49 bases, 9751809D]	6	A	g	chr3	+	176515103	176515151	176515108	176515103	176515120			A-to-I(G)	-0.0272446	0.874671	0.942406	-0.0573057	0.767789	0.961339	1	1	1	1	0.976	1	1	1	1	1	1	1	1	0.929	1	1	1	1	1	1	1	1	1	1	1	1	1	1	1
hsa-mir-301b_64_A_g	hsa-mir-301b MI0005568 [78 bases, B4D8E168] [78 bases, B4D8E168] [78 bases, B4D8E168] [78 bases, B4D8E168] [78 bases, B4D8E168] [78 bases, B4D8E168]	64	A	g	chr22	+	21652981	21653058	21653044	21652990	21653011	21653025	21653047	A-to-I(G)	0.182029	0.287992	0.546739	-0.03556	0.854695	0.967856	0.212	0.242	0.287	0.243	0.27	0.21	0.249	0.217	0.212	0.234	0.168	0.223	0.313	0.268	0.243	0.221	0.113	0.241	0.303	0.262	0.239	0.243	0.22	0.198	0.23	0.206	0.209	0.277	0.205
hsa-mir-497_25_A_g	hsa-mir-497 MI0003138 [112 bases, EF2C28FF] [112 bases, EF2C28FF] [112 bases, EF2C28FF] [112 bases, EF2C28FF] [112 bases, EF2C28 [112 bases, EF2C28FF]	25	A	g	chr17	-	7017911	7018022	7017998	7017979	7017999	7017938	7017959	A-to-I(G)	0.470353	0.00379383	0.0466099	0.0331314	0.864525	0.969487	0.111	0.103	0.123	0.119	0.118	0.127	0.155	0.133	0.118	0.044	0.03	0.096	0.032	0.05	0.029	0.046	0.04	0.076	0.043	0.035	0.044	0.044	0.077	0.09	0.076	0.061	0.096	0.191	0.069
hsa-mir-1260b_18_A_g	hsa-mir-1260b MI0014197 [89 bases, 7309AA37] [89 bases, 7309AA37] [89 bases, 7309AA37] [89 bases, 7309AA37] [89 bases, 7309AA37] [89 bases, 7309AA37]	18	A	g	chr11	+	96341438	96341526	96341455	96341447	96341465			A-to-I(G)	-0.000516999	0.997612	0.99762	-0.0263647	0.892014	0.981752	0.714	0.778	0.889	0.5	0.714	0.429	0.625	0.571	0.625	1	0.571	0.667	0.333	0.833	0.667	0.5	1	0.778	0.4	0.667	0.444	0.8	0.714	0.833	0.667	0.889	0.8	0.647	0.667
hsa-let-7a-2_28_A_g	hsa-let-7a-2 MI0000061 [72 bases, E61CFC7C] [72 bases, E61CFC7C] [72 bases, E61CFC7C] [72 bases, E61CFC7C] [72 bases, E61CFC7C] [72 bases, E61CFC7C]	28	A	g	chr11	-	122146522	122146593	122146566	122146568	122146589	122146523	122146544	A-to-I(G)	-0.37343	0.0248737	0.126091	-0.017416	0.92855	0.987198	0.435	0.388	0.453	0.397	0.31	0.434	0.37	0.34	0.4	0.401	0.509	0.481	0.5	0.475	0.48	0.358	0.478	0.487	0.454	0.425	0.408	0.486	0.448	0.415	0.454	0.492	0.547	0.642	0.423
hsa-mir-664a_18_A_g	hsa-mir-664a MI0006442 [82 bases, 6BFD131D] [82 bases, 6BFD131D] [82 bases, 6BFD131D] [82 bases, 6BFD131D] [82 bases, 6BFD131D] [82 bases, 6BFD131D]	18	A	g	chr1	-	220200538	220200619	220200602	220200586	220200609	220200549	220200571	A-to-I(G)	0.0349047	0.83984	0.927166	-0.0090157	0.962978	0.988678	0.049	0.085	0.104	0.065	0.091	0.167	0.072	0.067	0.092	0.12	0.037	0.077	0.076	0.118	0.027	0.081	0	0.081	0.087	0.055	0.034	0.059	0.113	0.075	0.066	0.08	0.124	0.139	0.099
hsa-mir-130b_71_A_g	hsa-mir-130b MI0000748 [82 bases, 6207FC45] [82 bases, 6207FC45] [82 bases, 6207FC45] [82 bases, 6207FC45] [82 bases, 6207FC45] [82 bases, 6207FC45]	71	A	g	chr22	+	21653304	21653385	21653374	21653316	21653336	21653354	21653375	A-to-I(G)	0.00908271	0.958071	0.976234	-0.00271874	0.988833	0.999133	0.041	0.047	0.075	0.033	0.074	0.07	0.063	0.063	0.042	0.057	0.028	0.058	0.124	0.071	0.127	0.079	0.048	0.051	0.124	0.043	0.083	0.097	0.059	0.044	0.061	0.035	0.075	0.103	0.055
hsa-mir-219a-2_33_C_u	hsa-mir-219a-2 MI0000740 [97 bases, 795EAB27] [97 bases, 795EAB27] [97 bases, 795EAB27] [97 bases, 795EAB27] [97 bases, 795EAB27 [97 bases, 795EAB27]	33	C	u	chr9	-	128392618	128392714	128392682	128392676	128392696	128392632	128392653	C-to-U	-0.134806	0.433111	0.672338	0.0978355	0.61363	0.921196	0.061	0.076	0.076	0.078	0.084	0.042	0.068	0.059	0.07	0.13	0.127	0.096	0.077	0.12	0.085	0.105	0.114	0.075	0.116	0.112	0.159	0.103	0.079	0.067	0.104	0.077	0.083	0.025	0.073
hsa-mir-125b-2_27_C_u	hsa-mir-125b-2 MI0000470 [89 bases, D7836F2E] [89 bases, D7836F2E] [89 bases, D7836F2E] [89 bases, D7836F2E] [89 bases, D7836F2E [89 bases, D7836F2E]	27	C	u	chr21	+	16590237	16590325	16590263	16590253	16590274	16590290	16590311	C-to-U	-0.56637	0.000317272	0.0149341	-0.0645197	0.739502	0.957145	0.017	0.014	0.016	0.016	0.016	0.021	0.016	0.016	0.022	0.049	0.059	0.043	0.075	0.048	0.072	0.05	0.05	0.042	0.076	0.043	0.055	0.075	0.041	0.015	0.057	0.061	0.046	0.076	0.045
hsa-mir-125b-1_25_C_u	hsa-mir-125b-1 MI0000446 [88 bases, CA568472] [88 bases, CA568472] [88 bases, CA568472] [88 bases, CA568472] [88 bases, CA568472 [88 bases, CA568472]	25	C	u	chr11	-	122099757	122099844	122099820	122099809	122099830	122099769	122099790	C-to-U	-0.564214	0.000338309	0.0149341	-0.0577166	0.766169	0.961339	0.017	0.014	0.016	0.016	0.016	0.021	0.016	0.016	0.023	0.049	0.059	0.043	0.075	0.048	0.072	0.05	0.051	0.043	0.077	0.043	0.056	0.076	0.041	0.015	0.057	0.061	0.046	0.076	0.045
hsa-mir-3653_42_C_u	hsa-mir-3653 MI0016053 [110 bases, 34F39935] [110 bases, 34F39935] [110 bases, 34F39935] [110 bases, 34F39935] [110 bases, 34F39 [110 bases, 34F39935]	42	C	u	chr22	-	29333158	29333267	29333226	29333226	29333245	29333176	29333193	C-to-U	-0.138	0.422189	0.66256	-0.0393877	0.839246	0.967856	0.184	0.239	0.146	0.162	0.222	0.075	0.161	0.288	0.278	0.214	0.417	0.191	0.333	0.27	0.111	0.2	0.125	0.194	0.3	0.182	0.133	0.353	0.156	0.132	0.245	0.185	0.18	0.038	0.207
[truncated: 36 more columns]

## Sheet: Fig.1d
The correlation between PC v s PC age and
ME_ID	ME_Category_Manual	correlation between PC and PC age	correlation between PD-PC and PD-PC age PD-PC vs PD-PC age
hsa-mir-1301_52_A_g	A-to-I(G)	0.541401	0.472439
hsa-mir-497_25_A_g	A-to-I(G)	0.470353	0.864525
hsa-mir-337_66_A_g	A-to-I(G)	0.453702	0.606213
hsa-let-7a-2_28_A_g	A-to-I(G)	-0.37343	0.92855
hsa-mir-376a-2_55_A_g	A-to-I(G)	0.296148	0.0496175
hsa-mir-125b-2_27_C_u	C-to-U	-0.56637	0.739502
hsa-mir-125b-1_25_C_u	C-to-U	-0.564214	0.766169

## Sheet: Fig. 1e
The plots of ages(y) against the editing levels of one A-to-I editing site (hsa-mir-1301_52_A_g) in PC samples.
Category	PC	PC	PC	PC	PC	PC	PC	PC	PC	PC	PC	PC	PC	PC	PC	PC	PC	PC	PC	PC	PC	PC	PC	PC	PC	PC	PC	PC	PC	PC	PC	PC	PC	PC	PC	PC
Samples	SRR1759212	SRR1759213	SRR1759214	SRR1759215	SRR1759216	SRR1759217	SRR1759218	SRR1759219	SRR1759220	SRR1759221	SRR1759222	SRR1759223	SRR1759224	SRR1759225	SRR1759226	SRR1759227	SRR1759228	SRR1759229	SRR1759230	SRR1759231	SRR1759232	SRR1759233	SRR1759234	SRR1759235	SRR1759236	SRR1759237	SRR1759238	SRR1759239	SRR1759240	SRR1759241	SRR1759242	SRR1759243	SRR1759244	SRR1759245	SRR1759246	SRR1759247
age(y)	73	91	82	97	86	91	81	79	63	66	69	79	61	58	70	66	60	76	61	62	69	61	93	53	57	43	71	46	40	44	57	80	75	76	68	64
hsa-mir-1301_52_A_g	10.7	11.8	9.5	14.2	12.5	13.5	8.9	11	9.4	8.9	9.2	7.5	7.3	8.9	4.2	13.3	9.2	13.1	10.5	7.4	10.3	10.5	11.6	10.5	5.8	6.5	8.5	11.3	7.4	7.5	6.8	8.7	11.4	13	10.9	9.8
ρ	0.54169
P-value	0.000644832

## Sheet: Fig. 1f
The plots of ages (y) against the editing levels of one C-to-U editing site (hsa-mir-125b-1_25_C_u) in PC samples.
Category	PC	PC	PC	PC	PC	PC	PC	PC	PC	PC	PC	PC	PC	PC	PC	PC	PC	PC	PC	PC	PC	PC	PC	PC	PC	PC	PC	PC	PC	PC	PC	PC	PC	PC	PC	PC
Samples	SRR1759212	SRR1759213	SRR1759214	SRR1759215	SRR1759216	SRR1759217	SRR1759218	SRR1759219	SRR1759220	SRR1759221	SRR1759222	SRR1759223	SRR1759224	SRR1759225	SRR1759226	SRR1759227	SRR1759228	SRR1759229	SRR1759230	SRR1759231	SRR1759232	SRR1759233	SRR1759234	SRR1759235	SRR1759236	SRR1759237	SRR1759238	SRR1759239	SRR1759240	SRR1759241	SRR1759242	SRR1759243	SRR1759244	SRR1759245	SRR1759246	SRR1759247
age(y)	73	91	82	97	86	91	81	79	63	66	69	79	61	58	70	66	60	76	61	62	69	61	93	53	57	43	71	46	40	44	57	80	75	76	68	64
hsa-mir-125b-1_25_C_u	1.7	1.4	1.6	1.6	1.6	2.1	1.6	1.6	2.3	4.9	5.9	4.3	7.5	4.8	7.2	5	5.1	4.3	7.7	4.3	5.6	7.6	4.1	1.5	5.7	6.1	4.6	7.6	4.5	4.6	5.2	6	1.9	1.9	3.6	7
ρ	-0.540675
P-value	0.00066315
