# Supplementary material for: Characterizing Relevant MicroRNA Editing Sites in Parkinson’s Disease
Source: Cells. 2022 Dec 24;12(1):75. doi: 10.3390/cells12010075 (PMC9818192; doi:10.3390/cells12010075)
Supplement: Supplementary file 1 [file cells-12-00075-s001.zip › TableS10_Fig4-source-data-2021-10-20.xlsx]

## Sheet: Fig. 4a
The conservation scores for 30 mammals at the A-to-I edited miR-497-5p complementary site in the 3' UTR of OPA1 calculated with PhyloP. The values were retrieved from the UCSC Genome Browser.
Bases	Position of chr3	PhyloP score
a	193695673	-0.0943386
a	193695674	0.166094
a	193695675	0.322354
t	193695676	1.10365
g	193695677	0.218181
c	193695678	0.114008
t	193695679	-1.3965
t	193695680	0.114008
t	193695681	1.10365
c	193695682	-0.250598
t	193695683	1.10365
t	193695684	1.10365
t	193695685	-0.406858
a	193695686	0.322354
c	193695687	0.99948
t	193695688	0.166094
t	193695689	1.10365
a	193695690	0.218181
a	193695691	-0.458945
a	193695692	0.322354
a	193695693	0.270268
t	193695694	-0.667291
g	193695695	-0.563118
t	193695696	0.166094
c	193695697	0.114008
t	193695698	1.10365
a	193695699	0.218181
t	193695700	1.10365
c	193695701	-0.719378
t	193695702	1.10365
c	193695703	0.114008
a	193695704	0.270268
T	193695705	1.10365
T	193695706	0.166094
T	193695707	0.166094
G	193695708	1.15574
C	193695709	-0.250598
T	193695710	-0.146425
G	193695711	-0.146425
C	193695712	0.99948
C	193695713	0.99948
t	193695714	-0.302685
t	193695715	1.10365
t	193695716	1.10365
t	193695717	1.10365
c	193695718	-0.250598
a	193695719	0.270268
c	193695720	0.166094
t	193695721	1.10365
a	193695722	1.25991
a	193695723	1.312
g	193695724	1.15574
c	193695725	-1.44859
c	193695726	0.99948
t	193695727	1.10365
t	193695728	-0.198512
t	193695729	0.166094
a	193695730	1.312
c	193695731	-0.250598
t	193695732	1.05157
t	193695733	-0.250598
t	193695734	0.114008
g	193695735	-0.302685

## Sheet: Fig. 4b
The conservation scores for 30 mammals at the A-to-I edited miR-497-5p complementary site in the 3' UTR of VAPB calculated with PhyloP. The values were retrieved from the UCSC Genome Browser.
Bases	Position of chr20	PhyloP score
g	58450496	0.141606
c	58450497	0.112346
t	58450498	1.13644
g	58450499	-0.326551
t	58450500	-0.853228
c	58450501	-1.58472
g	58450502	-1.32139
t	58450503	1.13644
t	58450504	1.13644
t	58450505	-0.150992
c	58450506	-0.794709
c	58450507	-0.297291
t	58450508	1.13644
t	58450509	1.13644
t	58450510	1.13644
t	58450511	1.13644
t	58450512	-0.180252
a	58450513	0.258646
a	58450514	1.312
a	58450515	1.312
g	58450516	0.141606
a	58450517	1.312
c	58450518	-0.414331
g	58450519	-0.180252
a	58450520	-0.0632126
t	58450521	1.13644
t	58450522	-0.238772
t	58450523	1.13644
a	58450524	0.258646
t	58450525	1.13644
c	58450526	-0.414331
a	58450527	1.312
a	58450528	1.312
c	58450529	0.0830866
t	58450530	-0.268032
g	58450531	0.141606
c	58450532	0.112346
t	58450533	1.13644
g	58450534	1.1657
c	58450535	-1.46768
c	58450536	0.112346
a	58450537	1.22422
t	58450538	0.170866
t	58450539	1.13644
t	58450540	1.13644
g	58450541	0.200126
g	58450542	0.200126
a	58450543	1.312
a	58450544	0.287906
c	58450545	1.0194
t	58450546	0.170866
t	58450547	1.13644
c	58450548	0.990142
c	58450549	0.960882
t	58450550	1.04866
a	58450551	0.258646
t	58450552	0.141606
a	58450553	1.312
a	58450554	1.312
g	58450555	0.141606
a	58450556	1.312
a	58450557	1.312
a	58450558	1.312

## Sheet: Fig. 4c - 4d
The sequences of A-to-I edited miR-497-5p complementary sites on OPA1 and VAPB in 30 mammals. These sequences were used to prepare the phylogenetic trees in Fig. 5c and 5d with ClustalX (v2.1).
Organism	Abbreviation	sequence of OPA1	sequence of VAPB
Aotus nancymaae	ana	tatctatctcatttgctgcct	actatatataaactgctgtca
Colobus angolensis palliatus	can	tgtctatctcatttgttgcct	actatttataaactgctgcca
Cercocebus atys	cat	tgtctatctcatttgctgcct	actatttataaactgctgcca
Cebus capucinus imitator	cca	tatctatctcatttgctgcct	actatatataaa---ctgtca
Callithrix jacchus	cja	tatctatctcatttgctgcct	actatatataaa---ctgtca
Canis lupus familiaris	clu	agtctttctcgtctctgctgtt	a--atttataaactgctgcca
Chlorocebus sabaeus	csa	tgtctatctcatttgctgcct	actatttataaactgctgcca
Tarsius syrichta	csy	cgtctatctcatttgctacca	acaatttataaactgctgct-
Dasypus novemcinctus	dno	tgtttttctcatttaactctgc	acagtttatgaacacttgcca
Eulemur flavifrons	efl	tgtctatttcatttgctgcct	acaatttataaactgctgcca
Eulemur macaco	ema	tgtctatttcatttgctgcct	acaatttataaactgctgcca
Gorilla gorilla gorilla	gor	tgtctatctcatttgctgcct	acgatttatcaactgctgcca
Homo sapiens	hsa	tgtctatctcatttgctgcct	acgatttatcaactgctgcca
Macaca fascicularis	mfa	tgtctatctcatttgctgcct	actatttataaactgctgcca
Mandrillus leucophaeus	mle	tgtctatctcatttgctgcct	actatttataaactgctgcca
Macaca nemestrina	mne	tgtctatctcatttgctgcct	actatttataaactgctgcca
Macaca mulatta	mul	tgtctatctcatttgctgcct	actatttataaactgctgcca
Microcebus murinus	mur	tgtctatctcatttgctgcct	acaatttataaactgctgcca
Mus musculus	mus	tgtctttttcatctgccacctt	aaaatatatgaactgctggca
Nasalis larvatus	nla	tgtctatctcatttgctgcct	actatttataaactgctgcca
Nomascus leucogenys	nle	tgtctatctcatttgctgcct	actatttatcaactgctgcca
Otolemur garnettii	oga	tacctatcttatttgctgcc	acaatttctaaacagctgtca
Papio anubis	pab	tgtctatctcatttgctgcct	actatttataaactgctgcca
Pan paniscus	pan	tgtctatctcatttgctgcct	acgatttatcaactgctgcca
Propithecus coquereli	pco	catctatctcattggctgcct	acaatttataaactgctgtca
Pongo pygmaeus abelii	ppy	tgtctatttcatttgctgcct	atgatttatcaactgctgcca
Pan troglodytes	ptr	tgtctatctcatttgctgcct	acgatttatcaactgctgcca
Rhinopithecus bieti	rbi	tgtctatctcatttgctgcct	actatttataaaatgctgcca
Rhinopithecus roxellana	rro	tgtctatctcatttgctgcct	actatttataaactgctgcca
Saimiri boliviensis	sbb	tatctatctcatttgccgcct	actgtatataaactgctgtca

## Sheet: Fig. 4e
The luciferase activities when co-transfecting a pGLO plasmid containing one of the 3' UTR segments in Fig. 4a and a pCDNA plasmid containing the original pre-hsa-mir-497 (p497) or A-to-I edited pre-hsa-mir-497, i.e., pre-hsa-mir-497_25g (p497_25g). The values are the Firefly/Renilla ratios. For each co-transfection pair, three biological replicates were performed. For each biological replicates,…
	Control	Human
Sample	pCDNA + pGLO	p497_25g + pGLO-OPA1	p497_25g + pGLO-OPA1m	p497 + pGLO-OPA1
biological_rep1	1.74	1.03	1.84	1.8
biological_rep2	1.91	1.19	2.03	1.86
biological_rep3	2.02	0.89	1.76	1.88
mean	1.89	1.03667	1.87667	1.84667
std	0.141067	0.150111	0.138684	0.0416333
Comparisons
GroupA	GroupB	P-value (two-tailed t-test)
p497_25g + pGLO-OPA1 (2)	(1)pCDNA + pGLO	0.00199803
p497_25g + pGLO-OPA1 (2)	(3)p497_25g + pGLO-OPA1m	0.00205769
p497_25g + pGLO-OPA1 (2)	(4)p497 + pGLO-OPA1	0.00084161
Raw data
biological_rep1
technical_replicate	pCDNA + pGLO	p497_25g + pGLO-OPA1	p497_25g + pGLO-OPA1m	p497 + pGLO-OPA1
1	1.66781	0.957628	1.72555	1.97887
2	1.67529	1.09118	1.85065	1.6746
3	1.87278	1.0388	1.95485	1.73453
avg1	1.73863	1.0292	1.84368	1.796
biological_rep2
technical_replicate	pCDNA + pGLO	p497_25g + pGLO-OPA1	p497_25g + pGLO-OPA1m	p497 + pGLO-OPA1
1	1.80489	1.15489	2.08309	1.91445
2	2.10046	1.15935	1.97276	1.92326
3	1.83346	1.26482	2.02975	1.75706
avg2	1.91294	1.19302	2.02854	1.86492
biological_rep3
technical_replicate	pCDNA + pGLO	p497_25g + pGLO-OPA1	p497_25g + pGLO-OPA1m	p497 + pGLO-OPA1
1	2.10799	0.859417	1.97841	1.88734
2	1.86489	0.889006	1.61502	1.91047
3	2.08926	0.930787	1.6738	1.8469
avg3	2.02072	0.89307	1.75574	1.88157

## Sheet: Fig. 4f
The luciferase activities when co-transfecting a pGLO plasmid containing one of the 3' UTR segments in Fig. 4a and a pCDNA plasmid containing the original pre-hsa-mir-497 (p497) or A-to-I edited pre-hsa-mir-497, i.e., pre-hsa-mir-497_25g (p497_25g). The values are the Firefly/Renilla ratios. For each co-transfection pair, three biological replicates were performed. For each biological replicates,…
	Control	Human
Sample	pCDNA + pGLO	p497_25g + pGLO-VAPB	p497_25g + pGLO-VAPBm	p497 + pGLO-VAPB
biological_rep1	4.5	1.39	3.45	3.92
biological_rep2	4.43	1.35	3.41	3.76
biological_rep3	4.72	1.38	3.41	3.74
mean	4.55	1.37333	3.42333	3.80667
std	0.151327	0.0208167	0.023094	0.0986577
Comparisons
GroupA	GroupB	P-value (two-tailed t-test)
p497_25g + pGLO-VAPB	pCDNA + pGLO	3.5461e-06
p497_25g + pGLO-VAPB	p497_25g + pGLO-VAPBm	3.5255e-08
p497_25g + pGLO-VAPB	p497 + pGLO-VAPB	1.958e-06
Raw data
biological_rep1
technical_replicate	pCDNA + pGLO	p497_25g + pGLO-VAPB	p497_25g + pGLO-VAPBm	p497 + pGLO-VAPB
1	4.05435	1.38117	3.28397	3.72588
2	4.34161	1.42219	3.42826	3.54165
3	5.11276	1.37646	3.64336	4.48041
avg1	4.50291	1.39327	3.45186	3.91598
biological_rep2
technical_replicate	pCDNA + pGLO	p497_25g + pGLO-VAPB	p497_25g + pGLO-VAPBm	p497 + pGLO-VAPB
1	3.9448	1.32541	3.30521	3.55671
2	4.72381	1.38352	3.48581	3.54594
3	4.63348	1.33743	3.45246	4.16559
avg2	4.43403	1.34878	3.41449	3.75608
biological_rep3
technical_replicate	pCDNA + pGLO	p497_25g + pGLO-VAPB	p497_25g + pGLO-VAPBm	p497 + pGLO-VAPB
1	4.44612	1.38727	3.32107	3.74219
2	4.94474	1.35547	3.49065	3.65166
3	4.76575	1.39337	3.41788	3.82995
avg3	4.71887	1.3787	3.40987	3.74127

## Sheet: Fig. 4g
The luciferase activities when co-transfecting a pGLO plasmid containing the 3' UTR segments of mouse Opa1 (musOpa1) in Fig. S9c and a pCDNA plasmid containing the original pre-hsa-mir-497 (p497) or A-to-I edited pre-hsa-mir-497, i.e., pre-hsa-mir-497_25g (p497_25g). The values are the Firefly/Renilla ratios. For each co-transfection pair, three biological replicates were performed. For each biol…
	Control	Human	Mouse	Mouse
Sample	pCDNA + pGLO	p497_25g + pGLO-OPA1	p497_25g + pGLO-musOpa1	p497+ pGLO-musOpa1
biological_rep1	0.69566	0.414	0.649215	0.717434
biological_rep2	0.845467	0.529	0.656066	0.838169
biological_rep3	0.832539	0.372	0.710577	0.849343
mean	0.791222	0.438333	0.671953	0.801649
std	0.0830114	0.0812794	0.0336247	0.0731457
Comparisons
GroupA	GroupB	P-value (two-tailed t-test)
p497_25g + pGLO-OPA1	pCDNA + pGLO	0.0222
p497_25g + pGLO-OPA1	p497_25g + pGLO-musOpa1	0.0433
p497_25g + pGLO-OPA1	p497 + pGLO-musOpa1	0.0222
Raw data
biological_rep1
technical_replicate	pCDNA + pGLO	p497_25g + pGLO-OPA1	p497_25g + pGLO-musOpa1	p497 + pGLO-musOpa1
1	0.706442	0.3862	0.5997	0.687501
2	0.666833	0.4385	0.635021	0.716801
3	0.713703	0.4184	0.712924	0.748
avg1	0.69566	0.414367	0.649215	0.717434
biological_rep2
technical_replicate	pCDNA + pGLO	p497_25g + pGLO-OPA1	p497_25g + pGLO-musOpa1	p497 + pGLO-musOpa1
1	0.784512	0.5118	0.665734	0.743857
2	0.838181	0.5162	0.652204	0.854794
3	0.913706	0.5607	0.65026	0.915858
avg2	0.845467	0.529567	0.656066	0.838169
biological_rep3
technical_replicate	pCDNA + pGLO	p497_25g + pGLO-OPA1	p497_25g + pGLO-musOpa1	p497 + pGLO-musOpa1
1	0.850898	0.3534	0.737668	0.841639
2	0.805091	0.3657	0.704132	0.842448
3	0.841628	0.3821	0.689931	0.863942
avg3	0.832539	0.367067	0.710577	0.849343

## Sheet: Fig. 4h
The luciferase activities when co-transfecting a pGLO plasmid containing the 3' UTR segment of mouse Vapb in Fig. S9d (musVapb) and a pCDNA plasmid containing the original pre-hsa-mir-497 (p497) or A-to-I edited pre-hsa-mir-497, i.e., pre-hsa-mir-497_25g (p497_25g). The values are the Firefly/Renilla ratios. For each co-transfection pair, three biological replicates were performed. For each biolo…
	Control	Human	Mouse	Mouse
Sample	pCDNA + pGLO	p497_25g + pGLO-VAPB	p497_25g + pGLO-musVapb	p497 + pGLO-musVapb
biological_rep1	4.5	1.39	3.31	3.03
biological_rep2	4.43	1.35	3.17	2.76
biological_rep3	4.72	1.38	3.65	3.02
mean	4.55	1.37333	3.37667	2.93667
std	0.151327	0.0208167	0.246847	0.15308
Comparisons
GroupA	GroupB	P-value (two-tailed t-test)
p497_25g + pGLO-VAPB	pCDNA + pGLO	3.5461e-06
p497_25g + pGLO-VAPB	p497_25g + pGLO-musVapb	0.00015071
p497_25g + pGLO-musVapb	p497 + pGLO-musVapb	0.0586
Raw data
biological_rep1
technical_replicate	pCDNA + pGLO	p497_25g + pGLO-VAPB	p497_25g + pGLO-musVapb	p497 + pGLO-musVapb
1	4.05435	1.38117	3.3083	2.9458
2	4.34161	1.42219	3.0479	2.8597
3	5.11276	1.37646	3.5862	3.2719
avg1	4.50291	1.39327	3.31413	3.0258
biological_rep2
technical_replicate	pCDNA + pGLO	p497_25g + pGLO-VAPB	p497_25g + pGLO-musVapb	p497 + pGLO-musVapb
1	3.9448	1.32541	2.7339	2.3477
2	4.72381	1.38352	3.4069	2.9892
3	4.63348	1.33743	3.3704	2.9393
avg2	4.43403	1.34878	3.1704	2.75873
biological_rep3
technical_replicate	pCDNA + pGLO	p497_25g + pGLO-VAPB	p497_25g + pGLO-musVapb	p497 + pGLO-musVapb
1	4.44612	1.38727	3.2458	2.8237
2	4.94474	1.35547	3.6819	3.071
3	4.76575	1.39337	4.0168	3.169
avg3	4.71887	1.3787	3.64817	3.02123
