# Supplementary material for: Characterizing Relevant MicroRNA Editing Sites in Parkinson’s Disease
Source: Cells. 2022 Dec 24;12(1):75. doi: 10.3390/cells12010075 (PMC9818192; doi:10.3390/cells12010075)
Supplement: Supplementary file 1 [file cells-12-00075-s001.zip › TableS11_Fig5-source-data-2022-08-01.xlsx]

## Sheet: Fig. 5a
The expression level of VAPB in the U-118-MG cell line of control and A-to-I edited hsa-mir-497_25g (p497_25g) groups.The relative RNA expression was examined using the 2^(-Delta Delta Ct) method analysis. The expression level of VAPB in different groups were then compared with two tailed t-tests.
Sample Name	Internal gene	Ct1	Ct1mean	Target Name	Ct2	Delta Ct=Ct2-Ct1mean	Delta Ct Mean	Delta Delta Ct	2-Delta Delta Ct
U-118-MG control-replicate1	actin	15.8169	15.8431	VAPB	23.9478	8.10471	8.0965	0.00820541	0.994329
	actin	15.9169		VAPB	23.8813	8.03817		-0.0583324	1.04126
	actin	15.7955		VAPB	23.9897	8.14663		0.050127	0.965851
U-118-MG control-replicate2	actin	15.933	15.9714	VAPB	24.8441	8.87274		0.776244	0.583885
	actin	15.989		VAPB	25.1013	9.1299		1.0334	0.488558
	actin	15.9922		VAPB	24.9363	8.96494		0.868438	0.54774
U-118-MG p497_25g--replicate1	actin	16.2312	16.3409	VAPB	25.9189	9.57797		1.48147	0.358123
	actin	16.3996		VAPB	25.9229	9.58197		1.48547	0.357132
	actin	16.3919		VAPB	25.9847	9.64377		1.54727	0.342158
Comparisons
U-118-MG control-replicate2	U-118-MG p497_25g--replicate1	P-value (two-tailed t-test)
0.583885	0.358123	0.0027
0.488558	0.357132
0.54774	0.342158

## Sheet: Fig. 5b
The expression level of VAPB in the Hs683 cell line of control and A-to-I edited hsa-mir-497_25g (p497_25g) groups.The relative RNA expression was examined using the 2^(-Delta Delta Ct) method analysis. The expression level of VAPB in different groups were then compared with two tailed t-tests.
Sample Name	Internal gene	Ct1	Ct1mean	Target Name	Ct2	Delta Ct=Ct2-Ct1mean	Delta Ct Mean	Delta Delta Ct	2-Delta Delta Ct
Hs683 control-replicate1	actin	20.1323	20.2411	VAPB	25.1213	4.88016	5.22914	-0.348973	1.27365
	actin	20.3136		VAPB	25.6111	5.37003		0.140891	0.906959
	actin	20.2775		VAPB	25.6783	5.43722		0.208082	0.865687
Hs683 control-replicate2	actin	16.0598	15.9784	VAPB	25.246	9.26763		4.03849	0.0608544
	actin	15.9621		VAPB	25.0154	9.03699		3.80785	0.0714039
	actin	15.9133		VAPB	25.4176	9.43918		4.21005	0.0540318
Hs683 miR-497_25g--replicate1	actin	16.3154	16.252	VAPB	25.948	9.69598		4.46685	0.0452215
	actin	16.2424		VAPB	25.9287	9.67667		4.44753	0.0458311
	actin	16.1982		VAPB	25.8593	9.60735		4.37821	0.0480869
Comparisons
Hs683 control-replicate2	Hs683 miR-497_25g--replicate1	P-value (two-tailed t-test)
0.0608544	0.0452215	0.0375
0.0714039	0.0458311
0.0540318	0.0480869

## Sheet: Fig. 5c
The expression level of OPA1 in the U-118-MG cell line of control and A-to-I edited hsa-mir-497_25g (p497_25g) groups.The relative RNA expression was examined using the 2^(-Delta Delta Ct) method analysis. The expression level of OPA1 in different groups were then compared with two tailed t-tests.
Sample Name	Internal gene	Ct1	Ct1mean	Target Name	Ct2	Delta Ct=Ct2-Ct1mean	Delta Ct Mean	Delta Delta Ct	2-Delta Delta Ct
U-118-MG control-replicate1	actin	19.7438	19.6941	OPA1	26.7778	7.08368	7.22856	-0.144878	1.10564
	actin	19.7856		OPA1	26.9382	7.24411		0.0155468	0.989282
	actin	19.5529		OPA1	27.052	7.35789		0.129332	0.914255
U-118-MG control-replicate2	actin	16.563	16.5284	OPA1	24.4113	7.88287		0.654316	0.635377
	actin	16.4728		OPA1	24.3068	7.77836		0.549797	0.683116
	actin	16.5495		OPA1	24.9532	8.42477		1.19621	0.436419
U-118-MG miR-497_25g--replicate1	actin	18.4055	17.2683	OPA1	28.1467	10.8784		3.6498	0.079671
	actin	17.3		OPA1	28.9564	11.6881		4.45958	0.0454499
	actin	16.0994		OPA1	28.7273	11.459		4.23039	0.0532752
Comparisons
U-118-MG control-replicate2	U-118-MG miR-497_25g--replicate1	P-value (two-tailed t-test)
0.635377	0.079671	0.0023
0.683116	0.0454499
0.436419	0.0532752

## Sheet: Fig. 5d
The expression level of OPA1 in the Hs683 cell line of control and A-to-I edited hsa-mir-497_25g (p497_25g) groups.The relative RNA expression was examined using the 2^(-Delta Delta Ct) method analysis. The expression level of OPA1 in different groups were then compared with two tailed t-tests.
Sample Name	Internal gene	Ct1	Ct1mean	Target Name	Ct2	Delta Ct=Ct2-Ct1mean	Delta Ct Mean	Delta Delta Ct	2-Delta Delta Ct
Hs683 control-replicate1	actin	24.4044	23.6725	OPA1	25.6082	1.93568	2.11899	-0.183311	1.13549
	actin	24.2468		OPA1	25.8364	2.16387		0.0448761	0.969373
	actin	22.3665		OPA1	25.93	2.25743		0.138435	0.908504
Hs683 control-replicate2	actin	20.4747	20.232	OPA1	24.8382	4.60622		2.48722	0.178349
	actin	20.3344		OPA1	25.0422	4.81016		2.69116	0.154838
	actin	19.887		OPA1	25.2039	4.97192		2.85293	0.138415
Hs683 miR-497_25g--replicate1	actin	16.6195	17.1136	OPA1	23.4901	6.37654		4.25755	0.0522817
	actin	17.6683		OPA1	23.8119	6.69836		4.57937	0.0418285
	actin	17.0529		OPA1	24.0177	6.90417		4.78518	0.0362675
Comparisons
Hs683 control-replicate2	Hs683 miR-497_25g--replicate1	P-value (two-tailed t-test)
0.178349	0.0522817	0.0008
0.154838	0.0418285
0.138415	0.0362675

## Sheet: Fig. 5e
The proliferation activities of U-118-MG cells was measured using an absorbance microplate reader at a wavelength of 490 nm, after 24 h transiently transfected with the hsa-mir-497-5p (p497) and hsa-mir-497_25g (p497_25g) plasmids. The cell proliferation activities of different groups were then compared with two tailed t-tests.
Sample	Control	lip2000	p497_25g	p497
biological_rep1	0.642	0.589	0.502	0.602
biological_rep2	0.668	0.629	0.537	0.626
biological_rep3	0.679	0.639	0.539	0.631
biological_rep4	0.68	0.643	0.545	0.634
biological_rep5	0.687	0.681	0.555	0.698
std	0.0158164	0.0294646	0.0179287	0.0319525
Comparisons
Control	p497_25g	P-value (two-tailed t-test)
0.642	0.502	P<0.0001
0.668	0.537
0.679	0.539
0.68	0.545
0.687	0.555
Comparisons
lip2000	p497_25g	P-value (two-tailed t-test)
0.589	0.502	0.0004
0.629	0.537
0.639	0.539
0.643	0.545
0.681	0.555
Comparisons
p497_25g	p497	P-value (two-tailed t-test)
0.502	0.602	0.0005
0.537	0.626
0.539	0.631
0.545	0.634
0.555	0.698

## Sheet: Fig. 5f
The proliferation activities of U-118-MG cells was measured using an absorbance microplate reader at a wavelength of 490 nm, after 48 h transiently transfected with the hsa-mir-497-5p (p497) and hsa-mir-497_25g (p497_25g) plasmids. The cell proliferation activities of different groups were then compared with two tailed t-tests.
Sample	Control	lip2000	p497_25g	p497
biological_rep1	0.885	0.886	0.597	0.755
biological_rep2	0.814	0.792	0.583	0.663
biological_rep3	0.789	0.783	0.506	0.658
biological_rep4	0.743	0.757	0.496	0.64
biological_rep5	0.723	0.718	0.496	0.634
std	0.0570908	0.0556827	0.0447866	0.0438497
Comparisons
Control	p497_25g	P-value (two-tailed t-test)
0.885	0.597	0.0001
0.814	0.583
0.789	0.506
0.743	0.496
0.723	0.496
Comparisons
lip2000	p497_25g	P-value (two-tailed t-test)
0.886	0.597	0.0001
0.792	0.583
0.783	0.506
0.757	0.496
0.718	0.496
Comparisons
p497_25g	p497	P-value (two-tailed t-test)
0.597	0.755	0.0027
0.583	0.663
0.506	0.658
0.496	0.64
0.496	0.634

## Sheet: Fig. 5g
The proliferation activities of U-118-MG cells was measured using an absorbance microplate reader at a wavelength of 490 nm, after 72 h transiently transfected with the hsa-mir-497-5p (p497) and hsa-mir-497_25g (p497_25g) plasmids. The cell proliferation activities of different groups were then compared with two tailed t-tests.
Sample	Control	lip2000	p497_25g	p497
biological_rep1	1.18	1.248	0.493	0.869
biological_rep2	1.058	1.202	0.661	0.813
biological_rep3	0.968	1.128	0.533	0.804
biological_rep4	0.822	1.27	0.531	0.7
biological_rep5	1.246	0.908	0.508	0.973
std	0.150979	0.130957	0.0597809	0.0892399
Comparisons
Control	p497_25g	P-value (two-tailed t-test)
1.18	0.493	0.0002
1.058	0.661
0.968	0.533
0.822	0.531
1.246	0.508
Comparisons
lip2000	p497_25g	P-value (two-tailed t-test)
1.248	0.493	P<0.0001
1.202	0.661
1.128	0.533
1.27	0.531
0.908	0.508
Comparisons
p497_25g	p497	P-value (two-tailed t-test)
0.493	0.869	0.0007
0.661	0.813
0.533	0.804
0.531	0.7
0.508	0.973

## Sheet: Fig. 5h
The proliferation activities of Hs683 cells was measured using an absorbance microplate reader at a wavelength of 450 nm, after 24 h transiently transfected with the hsa-mir-497-5p (p497) and hsa-mir-497_25g (p497_25g) plasmids. The cell proliferation activities of different groups were then compared with two tailed t-tests.
Sample	Control	p497_25g	p497
biological_rep1	0.561	0.396	0.503
biological_rep2	0.58	0.439	0.535
biological_rep3	0.589	0.448	0.568
biological_rep4	0.599	0.465	0.581
biological_rep5	0.639	0.48	0.611
std	0.0259199	0.0285279	0.0373609
Comparisons
Control	p497_25g	P-value (two-tailed t-test)
0.561	0.396	P<0.0001
0.58	0.439
0.589	0.448
0.599	0.465
0.639	0.48
Comparisons
p497_25g	p497	P-value (two-tailed t-test)
0.396	0.503	0.0013
0.439	0.535
0.448	0.568
0.465	0.581
0.48	0.611

## Sheet: Fig. 5i
The proliferation activities of Hs683 cells was measured using an absorbance microplate reader at a wavelength of 450 nm, after 48 h transiently transfected with the hsa-mir-497-5p (p497) and hsa-mir-497_25g (p497_25g) plasmids. The cell proliferation activities of different groups were then compared with two tailed t-tests.
Sample	Control	p497_25g	p497
biological_rep1	0.661	0.432	0.456
biological_rep2	0.669	0.444	0.484
biological_rep3	0.68	0.444	0.49
biological_rep4	0.706	0.451	0.497
biological_rep5	0.714	0.47	0.515
std	0.0206591	0.0124964	0.019252
Comparisons
Control	p497_25g	P-value (two-tailed t-test)
0.661	0.432	P<0.0001
0.669	0.444
0.68	0.444
0.706	0.451
0.714	0.47
Comparisons
p497_25g	p497	P-value (two-tailed t-test)
0.432	0.456	0.008
0.444	0.484
0.444	0.49
0.451	0.497
0.47	0.515

## Sheet: Fig. 5j
The proliferation activities of Hs683 cells was measured using an absorbance microplate reader at a wavelength of 450 nm, after 72 h transiently transfected with the hsa-mir-497-5p (p497) and hsa-mir-497_25g (p497_25g) plasmids. The cell proliferation activities of different groups were then compared with two tailed t-tests.
Sample	Control	p497_25g	p497
biological_rep1	0.956	0.349	0.651
biological_rep2	1.037	0.39	0.833
biological_rep3	1.104	0.543	0.868
biological_rep4	1.142	0.583	0.974
biological_rep5	1.373	0.603	0.999
std	0.14036	0.103965	0.123827
Comparisons
Control	p497_25g	P-value (two-tailed t-test)
0.956	0.349	P<0.0001
1.037	0.39
1.104	0.543
1.142	0.583
1.373	0.603
Comparisons
p497_25g	p497	P-value (two-tailed t-test)
0.349	0.651	0.0018
0.39	0.833
0.543	0.868
0.583	0.974
0.603	0.999
