# Supplementary material for: Characterizing Relevant MicroRNA Editing Sites in Parkinson’s Disease
Source: Cells. 2022 Dec 24;12(1):75. doi: 10.3390/cells12010075 (PMC9818192; doi:10.3390/cells12010075)
Supplement: Supplementary file 1 [file cells-12-00075-s001.zip › TableS12_FigS1-source-data-2021-10-20.xlsx]

## Sheet: Fig. S1a
The categories of signicant M/E sites in miRNAs. The A-to-G, C-to-U and Other M/E sites in Table S2.1 were classified to twenty types based on their original and edited nucleotide.
Type	Editing_Sites_ID	Total
A_c		0
A_g	hsa-mir-497_83_A_g;hsa-mir-376a-1_9_A_g;hsa-mir-381_52_A_g;hsa-mir-589_66_A_g;hsa-mir-625_58_A_g;hsa-mir-1260b_18_A_g;hsa-mir-7977_6_A_g;hsa-mir-379_10_A_g;hsa-mir-376c_48_A_g;hsa-mir-130b_71_A_g;hsa-mir-377_54_A_g;hsa-mir-539_18_A_g;hsa-mir-664a_18_A_g;hsa-mir-381_55_A_g;hsa-mir-301b_64_A_g;hsa-mir-376a-2_55_A_g;hsa-mir-337_66_A_g;hsa-let-7a-2_28_A_g;hsa-mir-1251_10_A_g;hsa-mir-411_20_A_g;hsa-mi…	23
A_u	NA	0
A_-	hsa-mir-331_80_A_-	1
C_a	NA	0
C_g	hsa-mir-26a-1_8_C_g	1
C_u	hsa-mir-3653_42_C_u;hsa-mir-125b-1_25_C_u;hsa-mir-125b-2_27_C_u;hsa-mir-219a-2_33_C_u	4
C_-	NA	0
G_a	NA	0
G_c	NA	0
G_u	NA	0
G_-	hsa-mir-26a-1_9_G_-	1
U_a	NA	0
U_c	NA	0
U_g	hsa-mir-1260a_22_U_g;	1
U_-	NA	0
-_a	NA	0
-_c	NA	0
-_g	NA	0
-_c	NA	0
Sum		31

## Sheet: Fig. S1b
The distribution of the numbers of pre-miRNAs with different numbers of 5_-, 3_-editing and Central editing sites.
3'-precursor	Number of editing events	5'-precursor	Number of editing events	Central	Number of editing events
hsa-let-7a-1	3	hsa-let-7a-1	1	hsa-let-7a-2	1
hsa-let-7a-2	1	hsa-let-7a-2	1	hsa-mir-1251	1
hsa-let-7a-3	4	hsa-let-7a-3	1	hsa-mir-125b-1	1
hsa-let-7b	6	hsa-let-7b	1	hsa-mir-125b-2	1
hsa-let-7c	3	hsa-let-7c	1	hsa-mir-1260a	1
hsa-let-7d	3	hsa-let-7d	1	hsa-mir-1260b	1
hsa-let-7e	6	hsa-let-7f-1	1	hsa-mir-1301	1
hsa-let-7f-1	4	hsa-let-7f-2	1	hsa-mir-130b	1
hsa-let-7f-2	3	hsa-mir-100	1	hsa-mir-219a-2	1
hsa-let-7g	5	hsa-mir-101-1	1	hsa-mir-26a-1	2
hsa-let-7i	4	hsa-mir-101-2	1	hsa-mir-301b	1
hsa-mir-100	3	hsa-mir-103a-1	1	hsa-mir-331	1
hsa-mir-101-1	5	hsa-mir-103a-2	1	hsa-mir-337	1
hsa-mir-101-2	4	hsa-mir-125a	1	hsa-mir-3653	1
hsa-mir-103a-1	4	hsa-mir-181a-2	1	hsa-mir-376a-1	2
hsa-mir-103a-2	3	hsa-mir-181c	1	hsa-mir-376a-2	1
hsa-mir-105-1	1	hsa-mir-21	1	hsa-mir-376c	1
hsa-mir-105-2	1	hsa-mir-22	1	hsa-mir-377	1
hsa-mir-106a	1	hsa-mir-26a-2	1	hsa-mir-379	1
hsa-mir-106b	5	hsa-mir-26b	1	hsa-mir-381	2
hsa-mir-107	3	hsa-mir-27b	1	hsa-mir-411	1
hsa-mir-10a	2	hsa-mir-4454	1	hsa-mir-497	2
hsa-mir-10b	1	hsa-mir-98	1	hsa-mir-539	1
hsa-mir-1180	3	Total	23	hsa-mir-589	1
hsa-mir-1224	2			hsa-mir-625	1
hsa-mir-124-1	5			hsa-mir-664a	1
hsa-mir-124-2	4			hsa-mir-7977	1
hsa-mir-124-3	4			Total	31
hsa-mir-1247	2
hsa-mir-125a	5
hsa-mir-125b-1	7
hsa-mir-125b-2	9
hsa-mir-126	5
hsa-mir-127	6
hsa-mir-1271	3
hsa-mir-128-1	6
hsa-mir-128-2	5
hsa-mir-129-1	6
hsa-mir-129-2	4
hsa-mir-1296	1
hsa-mir-1301	3
hsa-mir-1307	4
hsa-mir-130a	2
hsa-mir-130b	2
hsa-mir-132	2
hsa-mir-133a-1	1
hsa-mir-133a-2	1
hsa-mir-134	4
hsa-mir-135a-1	1
hsa-mir-135a-2	2
hsa-mir-136	2
hsa-mir-137	3
hsa-mir-138-1	6
hsa-mir-138-2	7
hsa-mir-139	4
hsa-mir-140	7
hsa-mir-142	2
hsa-mir-143	8
hsa-mir-145	6
hsa-mir-146a	3
hsa-mir-146b	3
hsa-mir-148a	2
hsa-mir-148b	2
hsa-mir-149	4
hsa-mir-150	3
hsa-mir-151a	8
hsa-mir-151b	1
hsa-mir-152	4
hsa-mir-153-1	2
hsa-mir-153-2	2
hsa-mir-155	2
hsa-mir-15a	3
hsa-mir-16-1	2
hsa-mir-16-2	2
hsa-mir-17	2
hsa-mir-181a-1	7
hsa-mir-181a-2	6
hsa-mir-181b-1	7
hsa-mir-181b-2	5
hsa-mir-181c	6
hsa-mir-181d	3
hsa-mir-184	3
hsa-mir-185	4
hsa-mir-186	2
hsa-mir-187	2
hsa-mir-190a	4
hsa-mir-191	2
hsa-mir-1912	1
hsa-mir-192	3
hsa-mir-193a	2
hsa-mir-193b	1
hsa-mir-195	3
hsa-mir-197	2
hsa-mir-199a-1	6
hsa-mir-199a-2	6
hsa-mir-199b	4
hsa-mir-19a	1
hsa-mir-19b-1	1
hsa-mir-19b-2	1
hsa-mir-200b	1
hsa-mir-203a	1
hsa-mir-204	4
hsa-mir-20a	1
hsa-mir-20b	1
hsa-mir-21	3
hsa-mir-210	3
hsa-mir-211	1
hsa-mir-2110	2
hsa-mir-212	3
hsa-mir-218-1	4
hsa-mir-218-2	5
hsa-mir-219a-1	1
hsa-mir-219a-2	3
hsa-mir-22	4
hsa-mir-221	2
hsa-mir-222	6
hsa-mir-223	3
hsa-mir-23a	3
hsa-mir-23b	2
hsa-mir-24-1	2
hsa-mir-24-2	2
hsa-mir-25	2
hsa-mir-2681	1
hsa-mir-2682	1
hsa-mir-26a-1	3
hsa-mir-26a-2	4
hsa-mir-26b	3
hsa-mir-27a	4
hsa-mir-27b	6
hsa-mir-28	5
hsa-mir-299	1
hsa-mir-29a	5
hsa-mir-29b-1	3
hsa-mir-29b-2	2
hsa-mir-29c	7
hsa-mir-301a	2
hsa-mir-3065	2
hsa-mir-30a	4
hsa-mir-30b	2
hsa-mir-30c-1	2
hsa-mir-30c-2	2
hsa-mir-30d	2
hsa-mir-30e	4
hsa-mir-31	1
hsa-mir-3117	2
hsa-mir-3200	3
hsa-mir-320a	4
hsa-mir-323a	3
hsa-mir-323b	2
hsa-mir-324	4
hsa-mir-326	2
hsa-mir-328	3
hsa-mir-329-1	4
hsa-mir-329-2	4
hsa-mir-330	9
hsa-mir-331	4
hsa-mir-335	1
hsa-mir-338	4
hsa-mir-339	4
hsa-mir-33a	2
hsa-mir-33b	1
hsa-mir-340	3
hsa-mir-342	5
hsa-mir-345	3
hsa-mir-346	2
hsa-mir-34a	3
hsa-mir-34b	1
hsa-mir-34c	2
hsa-mir-361	3
hsa-mir-3615	4
hsa-mir-363	1
hsa-mir-370	3
hsa-mir-374a	3
hsa-mir-374b	1
hsa-mir-375	2
hsa-mir-376a-1	2
hsa-mir-377	2
hsa-mir-378a	3
hsa-mir-379	3
hsa-mir-381	2
hsa-mir-382	2
hsa-mir-383	2
hsa-mir-409	2
hsa-mir-410	2
hsa-mir-411	3
hsa-mir-421	6
hsa-mir-423	5
hsa-mir-424	2
hsa-mir-425	4
hsa-mir-431	2
hsa-mir-432	3
hsa-mir-433	4
hsa-mir-448	2
hsa-mir-455	1
hsa-mir-484	3
hsa-mir-485	5
hsa-mir-486-1	2
hsa-mir-486-2	2
hsa-mir-487a	1
hsa-mir-487b	2
hsa-mir-488	2
hsa-mir-491	2
hsa-mir-493	1
hsa-mir-495	1
hsa-mir-497	2
hsa-mir-5001	1
hsa-mir-5006	1
hsa-mir-500a	3
hsa-mir-501	2
hsa-mir-5010	1
hsa-mir-502	2
hsa-mir-504	1
hsa-mir-5196	1
hsa-mir-532	2
hsa-mir-539	3
hsa-mir-543	1
hsa-mir-551b	1
hsa-mir-5699	1
hsa-mir-574	2
hsa-mir-577	2
hsa-mir-582	1
hsa-mir-584	5
hsa-mir-585	1
hsa-mir-598	3
hsa-mir-625	1
hsa-mir-628	7
hsa-mir-6516	1
hsa-mir-652	3
hsa-mir-654	3
hsa-mir-660	2
hsa-mir-671	3
hsa-mir-708	3
hsa-mir-7-1	4
hsa-mir-7-2	1
hsa-mir-7-3	3
hsa-mir-744	5
hsa-mir-758	2
hsa-mir-760	1
hsa-mir-766	2
hsa-mir-767	2
hsa-mir-769	5
hsa-mir-770	2
hsa-mir-873	5
hsa-mir-874	6
hsa-mir-885	2
hsa-mir-887	2
hsa-mir-889	1
hsa-mir-9-1	5
hsa-mir-9-2	5
hsa-mir-92a-1	3
hsa-mir-92a-2	2
hsa-mir-92b	5
hsa-mir-93	3
hsa-mir-9-3	5
hsa-mir-935	2
hsa-mir-940	1
hsa-mir-95	1
hsa-mir-98	2
hsa-mir-99a	4
hsa-mir-99b	7
Total	783

## Sheet:  Fig. S1c
The percentage of different types of editing events that have signifcant Spearman correlation ρ with the ages of individuals in the PC and PD-PC groups. The original value was shown in Table S6, Fig. 1b. The Spearman correlation between editing levels and the sample ages for PC or PD-PC were calculated with the corr function in MatLab. The M/E sites with P-value less than 0.05 were considered to …
editing categories	all-PC	all-PD-PC	positive-PC	positive-PD-PC	negative-PC	negative-PD-PC
3'-A	0.493392	0.566667	0.647482	0.911765	0.25	0.115385
3'-Other	0.061674	0.0166667	0.028777	0	0.113636	0.0384615
3'-U	0.343612	0.383333	0.251799	0.0588235	0.488636	0.807692
5'	0.0396476	0	0.0359712	0	0.0454545	0
A-to-I(G)	0.0176211	0.0166667	0.0215827	0	0.0113636	0.0384615
C-to-U	0.00881057	0	0	0	0.0227273	0
pseudo	0.0264317	0	0.00719424	0	0.0568182	0
SNP	0.00881057	0.0166667	0.00719424	0.0294118	0.0113636	0
