# Supplementary material for: Characterizing Relevant MicroRNA Editing Sites in Parkinson’s Disease
Source: Cells. 2022 Dec 24;12(1):75. doi: 10.3390/cells12010075 (PMC9818192; doi:10.3390/cells12010075)
Supplement: Supplementary file 1 [file cells-12-00075-s001.zip › TableS13_FigS2-source-data-2021-10-20.xlsx]

## Sheet: Fig. S2a
The editing levels of the 23 A-to-I editing sites in the 131 selected brain data sets. All the message of miRNA editing levels were extracted from Table S2.1.
Categories of samples	PD-PC	PD-PC	PD-PC	PD-PC	PD-PC	PD-PC	PD-PC	PD-PC	PD-PC	PD-PC	PD-PC	PD-PC	PD-PC	PD-PC	PD-PC	PD-PC	PD-PC	PD-PC	PD-PC	PD-PC	PD-PC	PD-PC	PD-PC	PD-PC	PD-PC	PD-PC	PD-PC	PD-PC	PD-PC	PD-Am	PD-Am	PD-Am	PD-Am	PD-Am	PD-Am	PD-Am	PD-Am	PD-Am	PD-Am	PD-Am	PD-Am	PD-Am	PD-Am	PC	PC	PC	PC	PC	PC
ME_ID	SRR2353417	SRR2353418	SRR2353419	SRR2353420	SRR2353421	SRR2353422	SRR2353423	SRR2353424	SRR2353425	SRR2353426	SRR2353427	SRR2353428	SRR2353429	SRR2353430	SRR2353431	SRR2353432	SRR2353433	SRR2353434	SRR2353435	SRR2353436	SRR2353437	SRR2353438	SRR2353439	SRR2353440	SRR2353441	SRR2353442	SRR2353443	SRR2353444	SRR2353445	SRR5398629	SRR5398630	SRR5398631	SRR5398632	SRR5398633	SRR5398634	SRR5398636	SRR5398643	SRR5398644	SRR5398645	SRR5398646	SRR5398647	SRR5398648	SRR5398650	SRR1759212	SRR1759213	SRR1759214	SRR1759215	SRR1759216	SRR1759217
hsa-let-7a-2_28_A_g	0.405	0.333	0.439	0.408	0.403	0.332	0.418	0.376	0.384	0.427	0.328	0.39	0.385	0.407	0.374	0.368	0.414	0.289	0.361	0.416	0.439	0.408	0.466	0.441	0.47	0.439	0.352	0.325	0.464	0.23	0.307	0.193	0.232	0.359	0.325	0.376	0.251	0.26	0.283	0.312	0.325	0.328	0.435	0.388	0.453	0.397	0.31	0.434	0.37
hsa-mir-130b_71_A_g	0.057	0.075	0.035	0.093	0.028	0.054	0.053	0.04	0.05	0.05	0.055	0.041	0.047	0.047	0.062	0.087	0.049	0.041	0.036	0.039	0.091	0.035	0.026	0.038	0.049	0.039	0.09	0.05	0.084	0.016	0.026	0.054	0.055	0.062	0.035	0.087	0.032	0.049	0.055	0.046	0.034	0.036	0.041	0.047	0.075	0.033	0.074	0.07	0.063
hsa-mir-301b_64_A_g	0.274	0.212	0.22	0.264	0.241	0.275	0.19	0.182	0.272	0.22	0.229	0.255	0.255	0.209	0.3	0.293	0.232	0.169	0.18	0.199	0.296	0.202	0.188	0.198	0.21	0.251	0.248	0.154	0.257	0.113	0.159	0.217	0.256	0.226	0.152	0.312	0.162	0.213	0.207	0.182	0.223	0.181	0.212	0.242	0.287	0.243	0.27	0.21	0.249
hsa-mir-337_66_A_g	0.147	0.089	0.109	0.229	0.087	0.151	0.182	0.069	0.118	0.077	0.281	0.111	0.154	0.103	0.133	0.196	0.125	0.148	0.191	0.107	0.127	0.075	0.122	0.154	0.211	0.094	0.172	0.167	0.138	0.059	0.115	0.132	0.047	0.025	0.107	0.375	0.105	0.113	0.129	0.058	0.135	0.17	0.115	0.136	0.244	0.143	0.171	0.133	0.145
hsa-mir-376a-1_9_A_g	0.109	0.06	0.062	0.092	0.071	0.064	0.077	0.074	0.08	0.065	0.065	0.067	0.046	0.076	0.064	0.072	0.06	0.063	0.064	0.104	0.085	0.08	0.078	0.073	0.085	0.082	0.069	0.075	0.079	0.028	0.013	0.02	0.019	0.023	0.021	0.364	0.02	0.018	0.025	0.023	0.042	0.047	0.066	0.072	0.066	0.07	0.071	0.141	0.121
hsa-mir-376a-1_49_A_g	0.852	0.888	0.867	0.879	0.89	0.867	0.891	0.854	0.813	0.857	0.879	0.879	0.893	0.855	0.884	0.862	0.844	0.888	0.889	0.878	0.889	0.808	0.895	0.909	0.848	0.89	0.9	0.882	0.923	0.844	0.837	0.769	0.814	0.777	0.774	0.75	0.877	0.776	0.831	0.784	0.846	0.787	0.826	0.891	0.895	0.78	0.843	0.9	0.842
hsa-mir-376a-2_55_A_g	0.894	0.888	0.867	0.879	0.89	0.867	0.891	0.854	0.871	0.857	0.879	0.879	0.941	0.855	0.884	0.862	0.844	0.888	0.889	0.878	0.889	0.865	0.895	0.909	0.848	0.89	0.9	0.882	0.923	0.844	0.837	0.773	0.814	0.777	0.774	0.75	0.877	0.776	0.848	0.784	0.846	0.787	0.826	0.891	0.895	0.816	0.843	0.9	0.842
hsa-mir-376c_48_A_g	0.811	0.772	0.87	0.865	0.862	0.799	0.823	0.807	0.834	0.838	0.83	0.804	0.835	0.826	0.881	0.992	0.825	0.814	0.827	0.8	0.797	0.821	0.994	0.833	0.8	0.829	0.858	0.759	0.833	0.772	0.778	0.827	0.752	0.718	0.805	0.551	0.846	0.831	0.795	0.849	0.752	0.775	0.802	0.794	0.793	0.848	0.849	0.8	0.955
hsa-mir-377_54_A_g	0.092	0.097	0.103	0.127	0.111	0.095	0.09	0.089	0.124	0.106	0.084	0.067	0.126	0.082	0.129	0.086	0.114	0.105	0.12	0.079	0.097	0.088	0.09	0.105	0.131	0.122	0.137	0.137	0.095	0.175	0.074	0.069	0.087	0.091	0.091	0.075	0.074	0.052	0.152	0.086	0.064	0.115	0.103	0.085	0.103	0.117	0.103	0.1	0.073
hsa-mir-379_10_A_g	0.087	0.073	0.102	0.093	0.108	0.097	0.091	0.098	0.098	0.081	0.099	0.103	0.066	0.076	0.084	0.095	0.08	0.085	0.084	0.071	0.079	0.079	0.086	0.102	0.091	0.077	0.088	0.077	0.074	0.091	0.062	0.06	0.042	0.059	0.049	0.075	0.064	0.061	0.068	0.069	0.08	0.08	0.073	0.112	0.082	0.084	0.113	0.095	0.099
hsa-mir-381_52_A_g	0.065	0.061	0.061	0.065	0.066	0.06	0.066	0.069	0.056	0.058	0.056	0.055	0.058	0.065	0.066	0.057	0.068	0.053	0.061	0.065	0.059	0.064	0.061	0.063	0.059	0.066	0.067	0.055	0.064	0.057	0.049	0.059	0.053	0.046	0.044	0.109	0.048	0.067	0.064	0.07	0.051	0.059	0.068	0.066	0.052	0.064	0.071	0.113	0.055
hsa-mir-381_55_A_g	0.061	0.047	0.053	0.062	0.053	0.053	0.057	0.058	0.053	0.051	0.05	0.049	0.062	0.054	0.064	0.057	0.053	0.048	0.055	0.059	0.057	0.054	0.053	0.053	0.055	0.047	0.065	0.057	0.057	0.045	0.036	0.046	0.038	0.034	0.041	0.051	0.036	0.052	0.042	0.049	0.04	0.041	0.058	0.056	0.048	0.058	0.06	0.063	0.065
hsa-mir-411_20_A_g	0.233	0.226	0.207	0.218	0.216	0.215	0.234	0.232	0.221	0.19	0.213	0.237	0.224	0.234	0.229	0.222	0.223	0.198	0.239	0.265	0.219	0.218	0.226	0.219	0.246	0.237	0.234	0.229	0.227	0.231	0.232	0.224	0.24	0.227	0.215	0.24	0.199	0.217	0.215	0.263	0.218	0.196	0.225	0.223	0.212	0.236	0.227	0.334	0.263
hsa-mir-497_25_A_g	0.156	0.091	0.15	0.134	0.139	0.139	0.121	0.101	0.139	0.137	0.157	0.139	0.116	0.145	0.134	0.128	0.107	0.112	0.103	0.112	0.148	0.096	0.122	0.13	0.12	0.135	0.108	0.113	0.147	0.005	0.009	0.021	0.015	0.012	0.015	0.025	0.016	0.022	0.023	0.01	0.018	0.016	0.111	0.103	0.123	0.119	0.118	0.127	0.155
hsa-mir-497_83_A_g	0.913	0.921	0.9	1	0.826	0.939	0.812	0.667	0.889	0.897	0.871	0.875	0.905	0.917	0.867	0.905	0.9	0.897	0.972	0.882	1	0.75	0.95	0.833	0.882	0.947	0.95	0.938	0.895	0.684	0.556	0.929	0.889	0.8	1	1	0.875	0.8	0.926	0.75	0.833	1	0.87	0.943	0.871	0.923	1	0.944	0.8
hsa-mir-539_18_A_g	0.116	0.127	0.147	0.131	0.142	0.114	0.164	0.118	0.143	0.12	0.096	0.158	0.196	0.091	0.126	0.128	0.119	0.1	0.131	0.121	0.138	0.105	0.074	0.115	0.162	0.137	0.17	0.129	0.127	0.118	0.067	0.083	0.111	0.08	0.064	0.048	0.114	0.116	0.105	0.101	0.064	0.125	0.086	0.101	0.138	0.099	0.138	0.201	0.187
hsa-mir-589_66_A_g	0.688	0.652	0.487	0.25	0.45	0.396	0.462	0.333	0.455	0.327	0.433	0.364	0.407	0.469	0.5	0.619	0.476	0.295	0.607	0.526	0.514	0.35	0.526	0.4	0.3	0.389	0.5	0.478	0.44	0.419	0.255	0.42	0.394	0.194	0.475	0.75	0.241	0.4	0.273	0.406	0.438	0.389	0.486	0.273	0.462	0.591	0.579	0.231	0.355
hsa-mir-625_58_A_g	0.102	0.143	0.163	0.2	0.075	0.078	0.113	0.043	0.2	0.161	0.27	0.14	0.111	0.079	0.167	0.189	0.159	0.153	0.136	0.056	0.204	0.08	0.053	0.143	0.099	0.143	0.133	0.085	0.154	0.098	0.05	0.125	0.1	0.128	0.141	0.077	0.162	0.038	0.125	0.085	0.075	0.091	0.114	0.143	0.125	0.103	0.096	0.071	0.068
hsa-mir-664a_18_A_g	0.125	0.093	0.072	0.141	0.146	0.099	0.1	0.078	0.029	0.125	0.119	0.079	0.121	0.075	0.105	0.108	0.092	0.062	0.08	0.05	0.079	0.127	0.075	0.088	0.103	0.109	0.07	0.059	0.059	0.025	0.083	0.05	0.038	0.052	0.104	0.08	0.045	0	0.072	0.099	0.032	0.019	0.049	0.085	0.104	0.065	0.091	0.167	0.072
hsa-mir-1251_10_A_g	0.16	0.178	0.176	0.247	0.103	0.265	0.179	0.185	0.152	0.144	0.146	0.188	0.225	0.231	0.2	0.109	0.167	0.169	0.081	0.257	0.215	0.158	0.2	0.316	0.208	0.14	0.156	0.164	0.205	0.104	0.091	0.027	0.054	0.042	0.064	0.308	0.088	0.06	0.105	0.027	0.102	0.082	0.16	0.139	0.121	0.118	0.094	0.078	0.157
hsa-mir-1260b_18_A_g	0.727	0.8	0.667	0.75	0.625	0.625	0.75	0.625	0.5	0.6	0.636	0.333	0.5	0.778	0.429	0.833	0.6	0.667	0.444	0.857	0.643	0.857	0.769	0.571	0.556	0.667	0.5	0.5	0.8	0.625	0.636	0.6	1	0.571	0.385	0.75	0.5	0.4	0.571	0.667	0.571	0.667	0.714	0.778	0.889	0.5	0.714	0.429	0.625
hsa-mir-1301_52_A_g	0.111	0.088	0.117	0.139	0.107	0.104	0.119	0.132	0.11	0.11	0.12	0.109	0.12	0.125	0.159	0.112	0.106	0.11	0.313	0.103	0.116	0.101	0.09	0.113	0.106	0.119	0.136	0.097	0.112	0.043	0.033	0.049	0.026	0.039	0.028	0.09	0.018	0.044	0.052	0.056	0.026	0.054	0.107	0.118	0.095	0.142	0.125	0.135	0.089
hsa-mir-7977_6_A_g	0.964	1	1	1	1	1	1	1	1	1	1	1	1	0.989	1	1	1	1	1	1	1	1	1	1	1	1	1	1	1	1	1	1	1	1	1	1	0.955	1	1	0.944	1	1	1	1	1	1	0.976	1	1
[truncated: 87 more columns]

## Sheet: Fig. S2b
The percentages of nucleotides immediately beside the 23 A-to-I editing sites.
Editing Events	5'	3'
hsa-let-7a-2_28_A_g	u	g
hsa-mir-130b_71_A_g	c	u
hsa-mir-301b_64_A_g	a	a
hsa-mir-337_66_A_g	u	u
hsa-mir-376a-1_9_A_g	u	g
hsa-mir-376a-1_49_A_g	u	g
hsa-mir-376a-2_55_A_g	u	g
hsa-mir-376c_48_A_g	u	g
hsa-mir-377_54_A_g	a	g
hsa-mir-379_10_A_g	u	g
hsa-mir-381_52_A_g	u	c
hsa-mir-381_55_A_g	a	g
hsa-mir-411_20_A_g	u	g
hsa-mir-497_25_A_g	c	g
hsa-mir-497_83_A_g	u	g
hsa-mir-539_18_A_g	u	u
hsa-mir-589_66_A_g	a	c
hsa-mir-625_58_A_g	u	g
hsa-mir-664a_18_A_g	u	g
hsa-mir-1251_10_A_g	u	g
hsa-mir-1260b_18_A_g	c	c
hsa-mir-1301_52_A_g	c	g
hsa-mir-7977_6_A_g	c	g
sum(u)	14 (0.17)	3 (0.04)
sum(g)	0 (0)	16 (0.13)
sum(c)	5 (0.22)	3 (0.70)
sum(a)	4 (0.61)	1 (0.13)

## Sheet: Fig. S2c
The MiRME map of hsa-mir-1301 in one of PD-PC samples (SRR2353435). The figure shows the numbers of total mapped reads (tptm), the numbers of M/E reads (tptm), and P-values (in -log10) at each nucleotide of the hsa-mir-1301 precursor in the sample SRR2353435.
position on precursor	1	2	3	4	5	6	7	8	9	10	11	12	13	14	15	16	17	18	19	20	21	22	23	24	25	26	27	28	29	30	31	32	33	34	35	36	37	38	39	40	41	42	43	44	45	46	47	48	49
Reads (tptm)	0	0	0	0	0	0	0	0	0	0	1	3	3	3	3	3	3	3	3	3	3	3	3	3	3	3	3	3	3	3	2	2	0	0	0	0	0	0	0	0	0	0	0	0	0	0	0	1171	1269
position on precursor	1	2	3	4	5	6	7	8	9	10	11	12	13	14	15	16	17	18	19	20	21	22	23	24	25	26	27	28	29	30	31	32	33	34	35	36	37	38	39	40	41	42	43	44	45	46	47	48	49
del (M/E reads(tptm))	0	0	0	0	0	0	0	0	0	0	0	0	0	0	0	0	0	0	0	0	0	0	0	0	0	0	0	0	0	0	0	0	0	0	0	0	0	0	0	0	0	0	0	0	0	0	0	0	0
U (M/E reads(tptm))	0	0	0	0	0	0	0	0	0	0	0	0	0	0	0	0	0	0	0	0	0	0	0	0	0	0	0	0	0	0	0	0	0	0	0	0	0	0	0	0	0	0	0	0	0	0	0	0	0
C (M/E reads(tptm))	0	0	0	0	0	0	0	0	0	0	0	0	0	0	0	0	0	0	0	0	0	0	0	0	0	0	0	0	0	0	0	0	0	0	0	0	0	0	0	0	0	0	0	0	0	0	0	0	1
A (M/E reads(tptm))	0	0	0	0	0	0	0	0	0	0	0	0	0	0	0	0	0	0	0	0	0	0	0	0	0	0	0	0	0	0	0	1	0	0	0	0	0	0	0	0	0	0	0	0	0	0	0	0	0
G (M/E reads(tptm))	0	0	0	0	0	0	0	0	0	0	0	0	0	0	0	0	0	0	0	0	0	0	0	0	0	0	0	0	0	0	0	0	0	0	0	0	0	0	0	0	0	0	0	0	0	0	0	0	0
insert (M/E reads(tptm))	0	0	0	0	0	0	0	0	0	0	0	0	0	0	0	0	0	0	0	0	0	0	0	0	0	0	0	0	0	0	0	0	0	0	0	0	0	0	0	0	0	0	0	0	0	0	0	0	0
position on precursor	32	49	52	58	60	66	67	68	69	70	71	72	73
del (P(-log10))	0	0	0	0	0	0	0	0	0	0	0	0	0
U (P(-log10))	0	0	0	0	0	0	0	0	0	0	9.93036	300	300
C (P(-log10))	0	0	0	0	0	0	0	0	0	0	0	0	0
A (P(-log10))	2.45888	0	0	0	0	0	0	0	0	0	0	0	0
G (P(-log10))	0	0	300	0	0	0	0	0	0	0	0	0	0
insert (P(-log10))	0	0	0	0	0	0	0	0	0	0	0	0	0
[truncated: 33 more columns]

## Sheet: Fig. S2d
The MiRME map of hsa-mir-381 in one of the unknown normal samples (SRR1658345). Legends are the same to those of Extended Data Fig. 2c.
position on precursor	1	2	3	4	5	6	7	8	9	10	11	12	13	14	15	16	17	18	19	20	21	22	23	24	25	26	27	28	29	30	31	32	33	34	35	36	37	38	39	40	41	42	43	44	45	46	47	48	49
Reads (tptm)	0	0	0	0	0	0	0	92	92	95	95	95	95	95	95	95	95	95	95	95	95	95	95	95	95	89	83	58	52	39	3	0	0	0	0	0	0	0	0	0	0	0	0	0	0	0	3	190	10370
position on precursor	1	2	3	4	5	6	7	8	9	10	11	12	13	14	15	16	17	18	19	20	21	22	23	24	25	26	27	28	29	30	31	32	33	34	35	36	37	38	39	40	41	42	43	44	45	46	47	48	49
del (M/E reads(tptm))	0	0	0	0	0	0	0	0	0	0	0	0	0	0	0	0	0	0	0	0	0	0	0	0	0	0	0	0	0	0	0	0	0	0	0	0	0	0	0	0	0	0	0	0	0	0	0	0	0
U (M/E reads(tptm))	0	0	0	0	0	0	0	0	0	0	0	0	0	0	0	0	0	0	0	0	0	0	0	0	0	0	0	0	0	0	0	0	0	0	0	0	0	0	0	0	0	0	0	0	0	0	0	0	0
C (M/E reads(tptm))	0	0	0	0	0	0	0	0	0	0	0	0	0	0	0	0	0	0	0	0	0	0	0	0	0	0	0	0	0	0	0	0	0	0	0	0	0	0	0	0	0	0	0	0	0	0	0	3	1
A (M/E reads(tptm))	0	0	0	0	0	0	0	0	0	0	0	0	1	0	0	0	0	0	0	0	0	0	0	0	0	0	0	0	0	0	0	0	0	0	0	0	0	0	0	0	0	0	0	0	0	0	0	0	1
G (M/E reads(tptm))	0	0	0	0	0	0	0	2	0	0	0	0	0	0	0	0	0	0	0	0	0	0	0	0	0	0	0	0	0	0	0	0	0	0	0	0	0	0	0	0	0	0	0	0	0	0	0	0	0
insert (M/E reads(tptm))	0	0	0	0	0	0	0	0	0	0	0	0	0	0	0	0	0	0	0	0	0	0	0	0	0	0	0	0	0	0	0	0	0	0	0	0	0	0	0	0	0	0	0	0	0	0	0	0	0
position on precursor	8	13	14	15	17	19	20	22	24	27	29	48	49	50	51	52	53	54	55	56	57	58	59	60	61	62	63	64	65	66	67	68	69	70	71
del (P(-log10))	0	0	0	0	0	0	0	0	0	0	0	0	0	0	0	0	0	0	0	0	0	0	0	0	0	0	0	0	0	0	0	0	0	0	0
U (P(-log10))	0	0	0	0	0	0	0	0	0	0	0	0	0	0	0	0	0	0	0	0	0	0	0	0	0	0	0	0	0	0	0	0	0	0	0
C (P(-log10))	0	0	0	0	0	0	0	0	0	0	0	0	0	0	0	0	0	0	0	0	0	0	0	0	0	0	0	0	0	0	0	0	0	0	0
A (P(-log10))	0	0	0	0	0	0	0	0	0	0	0	0	0	0	0	0	0	0	0	0	0	0	0	0	0	0	0	0	0	0	0	0	0	0	300
G (P(-log10))	0	0	0	0	0	0	0	0	0	0	0	0	0	0	0	300	0	0	2.19039	0	0	0	0	0	0	0	0	0	0	0	0	0	0	0	0
insert (P(-log10))	0	0	0	0	0	0	0	0	0	0	0	0	0	0	0	0	0	0	0	0	0	0	0	0	0	0	0	0	0	0	0	0	0	0	0
[truncated: 26 more columns]
