# Supplementary material for: Characterizing Relevant MicroRNA Editing Sites in Parkinson’s Disease
Source: Cells. 2022 Dec 24;12(1):75. doi: 10.3390/cells12010075 (PMC9818192; doi:10.3390/cells12010075)
Supplement: Supplementary file 1 [file cells-12-00075-s001.zip › TableS14_FigS3-source-data-2021-11-14.xlsx]

## Sheet: Fig. S3a
The editing levels of the 26 identified C-to-U editing sites in the 131 sRNA-seq profiles
Categories of samples	PD-PC	PD-PC	PD-PC	PD-PC	PD-PC	PD-PC	PD-PC	PD-PC	PD-PC	PD-PC	PD-PC	PD-PC	PD-PC	PD-PC	PD-PC	PD-PC	PD-PC	PD-PC	PD-PC	PD-PC	PD-PC	PD-PC	PD-PC	PD-PC	PD-PC	PD-PC	PD-PC	PD-PC	PD-PC	PD-Am	PD-Am	PD-Am	PD-Am	PD-Am	PD-Am	PD-Am	PD-Am	PD-Am	PD-Am	PD-Am	PD-Am	PD-Am	PD-Am	PC	PC	PC	PC	PC	PC
SRA accession	SRR2353417	SRR2353418	SRR2353419	SRR2353420	SRR2353421	SRR2353422	SRR2353423	SRR2353424	SRR2353425	SRR2353426	SRR2353427	SRR2353428	SRR2353429	SRR2353430	SRR2353431	SRR2353432	SRR2353433	SRR2353434	SRR2353435	SRR2353436	SRR2353437	SRR2353438	SRR2353439	SRR2353440	SRR2353441	SRR2353442	SRR2353443	SRR2353444	SRR2353445	SRR5398629	SRR5398630	SRR5398631	SRR5398632	SRR5398633	SRR5398634	SRR5398636	SRR5398643	SRR5398644	SRR5398645	SRR5398646	SRR5398647	SRR5398648	SRR5398650	SRR1759212	SRR1759213	SRR1759214	SRR1759215	SRR1759216	SRR1759217
hsa-mir-125b-1_25_C_u	0.017	0.018	0.015	0.014	0.017	0.017	0.018	0.021	0.022	0.021	0.022	0.021	0.018	0.015	0.016	0.018	0.02	0.02	0.018	0.022	0.018	0.019	0.017	0.019	0.017	0.021	0.019	0.019	0.017	0.061	0.076	0.061	0.055	0.071	0.062	0.062	0.042	0.059	0.049	0.051	0.057	0.06	0.056	0.017	0.014	0.016	0.016	0.016	0.021
hsa-mir-125b-2_27_C_u	0.017	0.018	0.015	0.014	0.017	0.017	0.018	0.021	0.022	0.02	0.021	0.021	0.018	0.015	0.015	0.018	0.019	0.02	0.018	0.022	0.018	0.019	0.017	0.019	0.017	0.02	0.019	0.019	0.017	0.06	0.075	0.061	0.055	0.07	0.061	0.062	0.042	0.059	0.049	0.051	0.057	0.06	0.056	0.017	0.014	0.016	0.016	0.016	0.021
hsa-mir-219a-2_33_C_u	0.075	0.091	0.068	0.078	0.093	0.075	0.071	0.064	0.074	0.086	0.092	0.066	0.065	0.07	0.045	0.069	0.068	0.083	0.061	0.074	0.059	0.069	0.071	0.071	0.074	0.085	0.066	0.066	0.078	0.086	0.15	0.113	0.089	0.074	0.099	0.072	0.033	0.083	0.099	0.064	0.069	0.111	0.073	0.061	0.076	0.076	0.078	0.084	0.042
hsa-mir-3653_42_C_u	0.222	0.102	0.238	0.2	0.211	0.194	0.143	0.197	0.231	0.19	0.271	0.22	0.114	0.341	0.294	0.16	0.172	0.224	0.113	0.24	0.245	0.083	0.231	0.267	0.222	0.233	0.286	0.207	0.239	0.133	0.185	0.217	0.222	0.042	0.241	0.093	0.75	0.125	0.167	0.286	0.214	0.267	0.333	0.184	0.239	0.146	0.162	0.222	0.075
[truncated: 82 more columns]

## Sheet: Fig. S3b
The percentages of nucleotides immediately beside the 4 C-to-U editing sites.
Editing Events	5'		3'
hsa-mir-125b-1_25_C_u	c	c	c
hsa-mir-125b-2_27_C_u	c	c	c
hsa-mir-219a-2_33_C_u	g	g	a
hsa-mir-3653_42_C_u	u	u	c
sum(u)	1	0.25	0	0
sum(g)	1	0.25	0	0
sum(c)	2	0.5	3	0.75
sum(a)	0	0	1	0.25

## Sheet: Fig. S3c
The MiRME map of hsa-mir-125b-1 in one of the corpus callosum (CC) samples (SRR2294748). Legends are the same as those of Extended Data Fig. 2c.
position on precursor	1	2	3	4	5	6	7	8	9	10	11	12	13	14	15	16	17	18	19	20	21	22	23	24	25	26	27	28	29	30	31	32	33	34	35	36	37	38	39	40	41	42	43	44	45	46	47	48	49
Reads (tptm)	0	0	0	0	0	0	0	0	0	0	0	0	8199	8222	8225	8315	8357	8360	8360	8360	8360	8360	8360	8360	8360	8360	8360	8360	8360	8360	8305	8235	5753	3829	1240	11	3	1	1	1	1	1	1	1	1	1	4	170	173
position on precursor	1	2	3	4	5	6	7	8	9	10	11	12	13	14	15	16	17	18	19	20	21	22	23	24	25	26	27	28	29	30	31	32	33	34	35	36	37	38	39	40	41	42	43	44	45	46	47	48	49
del (M/E reads(tptm))	0	0	0	0	0	0	0	0	0	0	0	0	0	0	0	0	0	0	0	0	0	0	0	0	0	0	0	0	0	0	0	0	0	0	0	0	0	0	0	0	0	0	0	0	0	0	0	0	0
U (M/E reads(tptm))	0	0	0	0	0	0	0	0	0	0	0	0	0	0	0	0	54	0	0	1	0	0	0	4	837	0	0	39	0	0	0	0	0	8	24	0	0	0	0	0	0	0	0	0	0	0	0	0	0
C (M/E reads(tptm))	0	0	0	0	0	0	0	0	0	0	0	0	0	0	0	0	0	0	0	0	1	0	0	0	0	1	0	0	0	0	0	0	0	0	1	0	0	0	0	0	0	0	0	0	0	0	0	0	0
A (M/E reads(tptm))	0	0	0	0	0	0	0	0	0	0	0	0	0	0	0	0	0	0	0	0	0	0	0	0	0	2	0	0	0	0	0	0	3	26	758	4	0	0	0	0	0	0	0	0	0	0	0	0	0
G (M/E reads(tptm))	0	0	0	0	0	0	0	0	0	0	0	0	1	3	0	1	0	0	0	1	0	0	0	0	0	0	6	0	0	0	2	0	0	0	0	0	0	0	0	0	0	0	0	0	0	0	0	0	0
insert (M/E reads(tptm))	0	0	0	0	0	0	0	0	0	0	0	0	0	0	0	0	0	0	0	0	0	0	0	0	0	0	0	0	0	0	0	0	0	0	0	0	0	0	0	0	0	0	0	0	0	0	0	0	0
position on precursor	12	13	14	15	16	17	18	19	20	21	23	24	25	26	27	28	31	32	33	34	35	36	69
del (P(-log10))	0	0	0	0	0	0	0	0	0	0	0	0	0	0	0	0	0	0	0	0	0	0	0
U (P(-log10))	0	0	0	0	0	0	0	0	0	0	0	0	300	0	0	0	0	0	0	0	0	0	0
C (P(-log10))	3.35004	0	0	0	0	0	0	0	0	0	0	0	0	0	0	0	0	0	0	0	0	0	0
A (P(-log10))	0	0	0	0	0	0	0	0	0	0	0	0	0	0	0	0	0	0	0	0	300	4.83259	0
G (P(-log10))	0	0	0	0	0	0	0	0	0	0	0	0	0	0	0	0	0	0	0	0	0	0	0
insert (P(-log10))	0	0	0	0	0	0	0	0	0	0	0	0	0	0	0	0	0	0	0	0	0	0	0
[truncated: 31 more columns]

## Sheet: Fig. S3d
The MiRME map of hsa-mir-125b-2 in one of the corpus callosum (CC) samples (SRR2294748). Legends are the same as those of Extended Data Fig. 2c.
position on precursor	1	2	3	4	5	6	7	8	9	10	11	12	13	14	15	16	17	18	19	20	21	22	23	24	25	26	27	28	29	30	31	32	33	34	35	36	37	38	39	40	41	42	43	44	45	46	47	48	49
Reads (tptm)	0	0	0	0	0	0	0	0	0	0	0	0	0	0	0	3	44308	44400	44428	44452	44464	44464	44464	44464	44464	44464	44464	44464	44464	44464	44464	44464	44464	44464	44439	43382	41666	29425	5357	89	6	0	0	0	0	0	0	0	0
position on precursor	1	2	3	4	5	6	7	8	9	10	11	12	13	14	15	16	17	18	19	20	21	22	23	24	25	26	27	28	29	30	31	32	33	34	35	36	37	38	39	40	41	42	43	44	45	46	47	48	49
del (M/E reads(tptm))	0	0	0	0	0	0	0	0	0	0	0	0	0	0	0	0	0	0	0	0	0	0	0	0	0	0	0	0	0	0	0	0	0	0	0	0	0	0	0	0	0	0	0	0	0	0	0	0	0
U (M/E reads(tptm))	0	0	0	0	0	0	0	0	0	0	0	0	0	0	0	0	0	13	5	1	0	0	0	1	0	11	3717	51	0	0	0	9	0	0	1	0	5	637	9	6	0	0	0	0	0	0	0	0	0
C (M/E reads(tptm))	0	0	0	0	0	0	0	0	0	0	0	0	0	0	0	3	2	0	0	0	6	0	0	0	0	0	0	0	1	0	0	0	2	1	1	2	0	7	34	0	0	0	0	0	0	0	0	0	0
A (M/E reads(tptm))	0	0	0	0	0	0	0	0	0	0	0	0	0	0	0	0	1	1	8	1	0	0	0	0	0	2	2	2	0	0	0	1	0	0	14	43	73	0	4860	47	0	0	0	0	0	0	0	0	0
G (M/E reads(tptm))	0	0	0	0	0	0	0	0	0	0	0	0	0	0	0	0	248	0	0	1	1	0	0	0	2	1	0	0	2	5	1	0	1	0	0	9	0	2364	0	0	0	0	0	0	0	0	0	0	0
insert (M/E reads(tptm))	0	0	0	0	0	0	0	0	0	0	0	0	0	0	0	0	0	0	0	0	0	0	0	0	0	0	0	0	0	0	0	0	0	0	0	0	0	0	0	0	0	0	0	0	0	0	0	0	0
position on precursor	15	16	17	18	19	20	21	22	23	24	25	26	27	28	29	30	31	32	33	34	35	36	37	38	39	40	41	54	55	56	57	58	59	60	61	62	63	64	65	66	67	68	69	70	71	72	73	74	75
del (P(-log10))	0	0	0	0	0	0	0	0	0	0	0	0	0	0	0	0	0	0	0	0	0	0	0	0	0	0	0	0	0	0	0	0	0	0	0	0	0	0	0	0	0	0	0	0	0	0	0	0	0
U (P(-log10))	0	0	0	0	0	0	0	0	0	0	0	0	300	0	0	0	0	0	0	0	0	0	0	0	0	0	0	0	0	0	0	0	0	0	0	0	0	0	0	0	0	0	0	0	0	0	0	0	0
C (P(-log10))	0	11.8168	0	0	0	0	0	0	0	0	0	0	0	0	0	0	0	0	0	0	0	0	0	0	0	0	0	0	0	0	0	0	0	0	0	0	0	0	0	0	0	0	0	0	0	0	0	0	0
A (P(-log10))	0	0	0	0	0	0	0	0	0	0	0	0	0	0	0	0	0	0	0	0	0	0	0	0	300	300	0	0	0	0	0	0	0	0	0	0	0	0	0	0	0	0	0	0	0	0	0	0	0
G (P(-log10))	0	0	0	0	0	0	0	0	0	0	0	0	0	0	0	0	0	0	0	0	0	0	0	300	0	0	0	0	0	0	0	0	0	0	0	0	0	0	0	0	0	0	0	0	0	0	0	0	0
insert (P(-log10))	0	0	0	0	0	0	0	0	0	0	0	0	0	0	0	0	0	0	0	0	0	0	0	0	0	0	0	0	0	0	0	0	0	0	0	0	0	0	0	0	0	0	0	0	0	0	0	0	0
[truncated: 40 more columns]

## Sheet: Fig. S3e
The MiRME map of hsa-mir-219a-2 in one of the corpus callosum (CC) samples (SRR2294748). Legends are the same as those of Extended Data Fig. 2c.
position on precursor	1	2	3	4	5	6	7	8	9	10	11	12	13	14	15	16	17	18	19	20	21	22	23	24	25	26	27	28	29	30	31	32	33	34	35	36	37	38	39	40	41	42	43	44	45	46	47	48	49
Reads (tptm)	1	1	1	1	1	1	1	1	1	1	1	1	1	1	1	1	2	5	18036	18065	18111	18125	18126	18126	18126	18126	18126	18126	18126	18126	18126	18126	18126	18126	18126	18126	18073	17985	16523	14570	8803	794	437	425	424	424	424	424	424
position on precursor	1	2	3	4	5	6	7	8	9	10	11	12	13	14	15	16	17	18	19	20	21	22	23	24	25	26	27	28	29	30	31	32	33	34	35	36	37	38	39	40	41	42	43	44	45	46	47	48	49
del (M/E reads(tptm))	0	0	0	0	0	0	0	0	0	0	0	0	0	0	0	0	0	0	0	0	0	0	0	0	0	0	0	0	0	0	0	0	0	0	0	0	0	0	0	0	0	0	0	0	0	0	0	0	0
U (M/E reads(tptm))	0	0	0	0	0	0	0	0	0	0	0	0	0	0	0	0	0	0	0	2	0	0	0	1	0	1	3	0	0	0	22	1	887	1	1	0	0	3	0	0	83	0	3	0	0	0	0	0	0
C (M/E reads(tptm))	0	0	0	0	0	0	0	0	0	0	0	0	0	0	0	0	0	0	4	0	0	4	0	0	2	0	0	0	22	0	0	1	0	0	0	0	0	0	3	0	1	3	0	0	0	0	0	0	0
A (M/E reads(tptm))	0	0	0	0	0	0	0	0	0	0	0	0	0	0	0	0	0	0	0	0	0	1	0	0	1	0	1	0	0	0	0	1	0	0	0	0	7	12	14	9	147	40	0	0	0	0	0	0	0
G (M/E reads(tptm))	0	0	0	0	0	0	0	0	0	0	0	0	0	0	0	0	0	0	0	0	0	0	0	0	1	0	1	0	0	0	0	0	0	2	1	0	0	9	3	7	0	4	0	0	0	0	0	0	0
insert (M/E reads(tptm))	0	0	0	0	0	0	0	0	0	0	0	0	0	0	0	0	0	0	0	0	0	0	0	0	0	0	0	0	0	0	0	0	0	0	0	0	0	0	0	0	0	0	0	0	0	0	0	0	0
position on precursor	17	18	19	20	21	22	23	24	25	26	27	28	29	30	31	32	33	34	35	36	37	38	39	40	41	42	43	44	53	55	56	59	60	61	62	63	66	68	70	71	72	73	74	75	76	78	80	81	84
del (P(-log10))	0	0	0	0	0	0	0	0	0	0	0	0	0	0	0	0	0	0	0	0	0	0	0	0	0	0	0	0	0	0	0	0	0	0	0	0	0	0	0	0	0	0	0	0	0	0	0	0	0
U (P(-log10))	0	0	0	0	0	0	0	0	0	0	0	0	0	0	0	0	0	0	0	0	0	0	0	0	0	0	0	0	0	0	0	0	0	0	300	0	0	0	0	0	300	0	0	0	0	0	0	0	0
C (P(-log10))	0	0	0	0	0	0	0	0	0	0	0	0	0	0	0	0	0	0	0	0	0	0	0	0	0	0	0	0	0	0	0	0	0	0	0	0	0	0	0	0	0	0	0	0	0	0	0	0	0
A (P(-log10))	0	0	0	0	0	0	0	0	0	0	0	0	0	0	0	0	0	0	0	0	0	0	0	0	0	0	0	0	0	0	0	0	0	0	0	0	0	0	0	0	0	0	0	0	0	0	0	0	0
G (P(-log10))	0	0	0	0	0	0	0	0	0	0	0	0	0	0	0	0	0	0	0	0	0	0	0	0	0	0	0	0	0	0	0	0	0	0	0	0	0	0	0	0	0	0	0	0	0	0	0	0	0
insert (P(-log10))	0	0	0	0	0	0	0	0	0	0	0	0	0	0	0	0	0	0	0	0	0	0	0	0	0	0	0	0	0	0	0	0	0	0	0	0	0	0	0	0	0	0	0	0	0	0	0	0	0
[truncated: 48 more columns]
