# Supplementary material for: Characterizing Relevant MicroRNA Editing Sites in Parkinson’s Disease
Source: Cells. 2022 Dec 24;12(1):75. doi: 10.3390/cells12010075 (PMC9818192; doi:10.3390/cells12010075)
Supplement: Supplementary file 1 [file cells-12-00075-s001.zip › TableS15_FigS4-source-data-2021-11-14.xlsx]

## Sheet: Fig. S4a
The M/E levels of the 14 SNPs in the 131 sRNA-seq profiles. The data were extracted from Table S2.1.
ME_ID	SRR2353417_ME_ID	SRR2353418_ME_ID	SRR2353419_ME_ID	SRR2353420_ME_ID	SRR2353421_ME_ID	SRR2353422_ME_ID	SRR2353423_ME_ID	SRR2353424_ME_ID	SRR2353425_ME_ID	SRR2353426_ME_ID	SRR2353427_ME_ID	SRR2353428_ME_ID	SRR2353429_ME_ID	SRR2353430_ME_ID	SRR2353431_ME_ID	SRR2353432_ME_ID	SRR2353433_ME_ID	SRR2353434_ME_ID	SRR2353435_ME_ID	SRR2353436_ME_ID	SRR2353437_ME_ID	SRR2353438_ME_ID	SRR2353439_ME_ID	SRR2353440_ME_ID	SRR2353441_ME_ID	SRR2353442_ME_ID	SRR2353443_ME_ID	SRR2353444_ME_ID	SRR2353445_ME_ID	SRR5398629_ME_ID	SRR5398630_ME_ID	SRR5398631_ME_ID	SRR5398632_ME_ID	SRR5398633_ME_ID	SRR5398634_ME_ID	SRR5398636_ME_ID	SRR5398643_ME_ID	SRR5398644_ME_ID	SRR5398645_ME_ID	SRR5398646_ME_ID	SRR5398647_ME_ID	SRR5398648_ME_ID	SRR5398650_ME_ID	SRR1759212_ME_ID	SRR1759213_ME_ID	SRR1759214_ME_ID	SRR1759215_ME_ID	SRR1759216_ME_ID	SRR1759217_ME_ID
hsa-mir-26a-1_9_G_c	0.293	0.484	0.316	0.44	0.394	0.459	0.381	0.49	0.273	0.333	0.279	0.5	0.5	0.417	0.375	0.517	0.515	0.383	0.463	0.686	0.441	0.529	0.393	0.5	0.433	0.412	0.375	0.316	0.344	0.956	0.983	0.981	0.991	0.987	0.961	0.976	0.991	0.99	0.972	0.971	0.972	0.983	0.975	0.58	0.409	0.412	0.48	0.372	0.385
hsa-mir-23b_81_G_u	0.974	0.965	0.971	0.97	0.97	0.975	0.97	0.965	0.967	0.979	0.976	0.969	0.974	0.971	0.966	0.974	0.962	0.971	0.97	0.954	0.979	0.959	0.969	0.974	0.966	0.968	0.976	0.966	0.972	0.947	0.957	0.96	0.955	0.957	0.943	0.952	0.937	0.881	0.944	0.887	0.902	0.891	0.902	0.946	0.975	0.968	0.966	0.96	0.96
hsa-mir-758_74_C_u	0.214	0.312	0.156	0.26	0.222	0.333	0.135	0.219	0.393	0.173	0.328	0.4	0.156	0.167	0.273	0.263	0.179	0.261	0.355	0.462	0.367	0.125	0.118	0.231	0.353	0.333	0.233	0.308	0.192	0.025	0.088	0.086	0.058	0.034	0.087	0.069	0.214	0.045	0.047	0.077	0.074	0.033	0.091	0.15	0.188	0.188	0.167	0.158	0.286
hsa-mir-6511b-1_77_C_u	1	1	1	1	1	1	1	1	1	1	1	1	1	1	1	1	1	1	1	1	1	1	1	1	1	1	1	1	1	1	1	1	1	1	1	1	1	1	1	1	1	1	1	1	1	1	1	1	1
hsa-mir-2277_42_A_u	0.786	1	0.538	1	0	1	0.667	0.5	0.333	0.667	0.5	1	0.857	0.778	0.833	0.917	0.714	0.6	1	0	0.818	1	0.5	0.5	1	0.75	0.75	0.333	1	0.667	1	0.333	0.5	0.5	0.4	0.667	1	0.857	0.833	1	0.429	0.5	0.5	0.833	0.636	0.75	1	0.333	1
hsa-mir-943_76_C_u	1	1	0.833	1	1	1	0.667	1	0.875	0.929	1	1	0.833	0.75	0.833	0	1	1	1	1	1	0.875	1	0.667	1	1	0.75	0.5	1	0.75	1	0.75	0.9	0.333	1	1	0.8	0.889	0.75	0.667	1	1	0.714	0.667	0.8	0.556	1	0.875	1
hsa-mir-544b_27_U_g	1	1	0	1	0	0	0	0	0	0	0	1	0	1	1	1	0.972	0	1	1	0	1	0	1	1	1	0	0	0	0	0	0	0	0	1	0	0	1	0	0	0	0	0	0	0	1	0	0	0
hsa-mir-4662a_28_C_a	0.833	0.88	0.846	1	1	1	1	0.923	1	0.889	1	0.846	1	1	0	0.5	0.75	1	1	0.889	1	1	1	1	1	1	1	0.8	0.875	1	1	1	0.833	1	1	0	1	1	1	1	1	1	1	1	0.9	1	1	1	1
hsa-mir-4999_29_U_c	0	0.8	0.667	0.273	0.571	0	0	0	0	0.667	0.722	0.25	0.25	1	0.625	0	0	0	0.9	0.5	0	0.444	0	0	0.667	0	0.5	0	0.667	0.5	1	0	0	0	0.556	0.714	0.333	0	0	0.7	0	0	1	0	0.462	0.667	0	0	0
hsa-mir-143_50_A_u	1	0.667	0.833	1	0	1	0.5	1	0.9	1	0	1	0.8	0.5	0.643	0.833	1	1	0.833	1	0.857	1	0	0.714	0	1	0.75	0.5	0.8	0	0	0.667	0.818	1	1	1	1	0.7	0.875	0.75	0.667	0.625	1	1	0.643	0.875	0.333	1	0.667
hsa-mir-3622a_21_G_a	0.688	0	0	0.769	0.733	0	0	0	0	0.429	0.706	0	0.667	0	0.812	0	0	0.818	0.625	0	0	0.75	0	0	0	0	1	0	0	1	0.5	0	0	0.571	0	0	0	0.923	0	0.786	0	0	0.6	1	0	0	0	0	0
hsa-mir-1304_65_C_a	1	1	1	1	1	1	1	1	1	1	1	1	1	1	1	1	1	1	1	0.923	1	1	1	1	1	1	1	1	1	1	1	1	1	1	0.172	1	1	1	1	1	1	1	1	1	1	1	1	1	1
hsa-mir-98_101_C_u	0.994	0.989	0.99	0.997	0.985	0.982	0.989	0.982	0.984	0.993	0.991	0.986	0.994	0.99	0.984	0.995	0.962	0.987	0.988	0.979	0.995	0.99	0.987	0.969	0.985	0.996	0.987	0.961	0.996	0.976	0.986	0.973	0.985	0.957	0.987	0.981	0.932	0.799	0.956	0.754	0.786	0.785	0.851	0.987	0.981	0.992	0.988	0.989	0.983
hsa-mir-3117_49_G_a	0	0	0.239	0	0	0	0.236	0.275	0	0	0.113	0	0.016	0.153	0.093	0	0	0	0	0.217	0	0	0	0	0	0	0	0	0	0.123	0	0.079	0.865	0	0	0	0	0	0	0	0.154	0	0	0	0.951	0	0	0	0
[truncated: 82 more columns]

## Sheet: Fig. S4b
The MiRME map of hsa-mir-544b in one of the prefrontal cortex samples (SRR2353432). Legends are the same as those of Extended Data Fig. S2c.
position on precursor	1	2	3	4	5	6	7	8	9	10	11	12	13	14	15	16	17	18	19	20	21	22	23	24	25	26	27	28	29	30	31	32	33	34	35	36	37	38	39	40	41	42	43	44	45	46	47	48	49
Reads (tptm)	0	0	0	0	0	0	0	0	0	0	0	82	82	82	82	82	82	82	82	82	82	82	82	82	82	82	82	82	82	82	82	82	0	0	0	0	0	0	0	0	0	0	0	0	0	0	2	2	2
position on precursor	1	2	3	4	5	6	7	8	9	10	11	12	13	14	15	16	17	18	19	20	21	22	23	24	25	26	27	28	29	30	31	32	33	34	35	36	37	38	39	40	41	42	43	44	45	46	47	48	49
del (M/E reads(tptm))	0	0	0	0	0	0	0	0	0	0	0	0	0	0	0	0	0	0	0	0	0	0	0	0	0	0	0	0	0	0	0	0	0	0	0	0	0	0	0	0	0	0	0	0	0	0	0	0	0
U (M/E reads(tptm))	0	0	0	0	0	0	0	0	0	0	0	0	0	0	0	0	0	0	0	0	0	0	0	0	0	0	0	0	0	0	0	0	0	0	0	0	0	0	0	0	0	0	0	0	0	0	0	0	0
C (M/E reads(tptm))	0	0	0	0	0	0	0	0	0	0	0	0	0	0	0	0	0	0	0	0	0	0	0	0	0	0	0	0	0	0	0	0	0	0	0	0	0	0	0	0	0	0	0	0	0	0	0	0	0
A (M/E reads(tptm))	0	0	0	0	0	0	0	0	0	0	0	0	0	0	0	0	0	0	0	0	0	0	0	0	0	0	0	0	0	0	0	0	0	0	0	0	0	0	0	0	0	0	0	0	0	0	0	0	0
G (M/E reads(tptm))	0	0	0	0	0	0	0	0	0	0	0	0	0	0	0	0	0	0	0	0	0	0	0	0	0	0	82	0	0	0	0	0	0	0	0	0	0	0	0	0	0	0	0	0	0	0	0	0	0
insert (M/E reads(tptm))	0	0	0	0	0	0	0	0	0	0	0	0	0	0	0	0	0	0	0	0	0	0	0	0	0	0	0	0	0	0	0	0	0	0	0	0	0	0	0	0	0	0	0	0	0	0	0	0	0
position on precursor	27
del (P(-log10))	0
U (P(-log10))	0
C (P(-log10))	0
A (P(-log10))	0
G (P(-log10))	300
insert (P(-log10))	0
[truncated: 29 more columns]

## Sheet: Fig. S4c
The MiRME map of hsa-mir-1304 in one the normal prefrontal cortex samples (SRR2294748). Legends are the same as those of Extended Data Fig. S2c.
position on precursor	1	2	3	4	5	6	7	8	9	10	11	12	13	14	15	16	17	18	19	20	21	22	23	24	25	26	27	28	29	30	31	32	33	34	35	36	37	38	39	40	41	42	43	44	45	46	47	48	49
Reads (tptm)	0	0	0	0	0	0	0	0	0	0	0	0	0	0	0	0	1	1	1	1	1	1	1	1	1	1	1	1	1	1	1	1	1	1	1	1	1	1	0	0	0	0	0	0	0	0	0	0	0
position on precursor	1	2	3	4	5	6	7	8	9	10	11	12	13	14	15	16	17	18	19	20	21	22	23	24	25	26	27	28	29	30	31	32	33	34	35	36	37	38	39	40	41	42	43	44	45	46	47	48	49
del (M/E reads(tptm))	0	0	0	0	0	0	0	0	0	0	0	0	0	0	0	0	0	0	0	0	0	0	0	0	0	0	0	0	0	0	0	0	0	0	0	0	0	0	0	0	0	0	0	0	0	0	0	0	0
U (M/E reads(tptm))	0	0	0	0	0	0	0	0	0	0	0	0	0	0	0	0	0	0	0	0	0	0	0	0	0	0	0	0	0	0	0	0	0	0	0	0	0	0	0	0	0	0	0	0	0	0	0	0	0
C (M/E reads(tptm))	0	0	0	0	0	0	0	0	0	0	0	0	0	0	0	0	0	0	0	0	0	0	0	0	0	0	0	0	0	0	0	0	0	0	0	0	0	0	0	0	0	0	0	0	0	0	0	0	0
A (M/E reads(tptm))	0	0	0	0	0	0	0	0	0	0	0	0	0	0	0	0	0	0	0	0	0	0	0	0	0	0	0	0	0	0	0	0	0	0	0	0	0	0	0	0	0	0	0	0	0	0	0	0	0
G (M/E reads(tptm))	0	0	0	0	0	0	0	0	0	0	0	0	0	0	0	0	0	0	0	0	0	0	0	0	0	0	0	0	0	0	0	0	0	0	0	0	0	0	0	0	0	0	0	0	0	0	0	0	0
insert (M/E reads(tptm))	0	0	0	0	0	0	0	0	0	0	0	0	0	0	0	0	0	0	0	0	0	0	0	0	0	0	0	0	0	0	0	0	0	0	0	0	0	0	0	0	0	0	0	0	0	0	0	0	0
position on precursor	65
del (P(-log10))	0
U (P(-log10))	0
C (P(-log10))	0
A (P(-log10))	300
G (P(-log10))	0
insert (P(-log10))	0
[truncated: 42 more columns]

## Sheet: Fig. S4d
The MiRME map of hsa-mir-4999 in one the normal amygdala samples (SRR5398642). Legends are the same as those of Extended Data Fig. S2c.
position on precursor	1	2	3	4	5	6	7	8	9	10	11	12	13	14	15	16	17	18	19	20	21	22	23	24	25	26	27	28	29	30	31	32	33	34	35	36	37	38	39	40	41	42	43	44	45	46	47	48	49
Reads (tptm)	0	0	0	0	0	0	0	0	0	0	0	0	0	0	0	0	1	2	5	10	16	16	16	16	16	16	16	16	16	16	16	16	16	16	16	16	16	16	16	13	7	2	0	0	0	0	0	0	0
position on precursor	1	2	3	4	5	6	7	8	9	10	11	12	13	14	15	16	17	18	19	20	21	22	23	24	25	26	27	28	29	30	31	32	33	34	35	36	37	38	39	40	41	42	43	44	45	46	47	48	49
del (M/E reads(tptm))	0	0	0	0	0	0	0	0	0	0	0	0	0	0	0	0	0	0	0	0	0	0	0	0	0	0	0	0	0	0	0	0	0	0	0	0	0	0	0	0	0	0	0	0	0	0	0	0	0
U (M/E reads(tptm))	0	0	0	0	0	0	0	0	0	0	0	0	0	0	0	0	0	0	0	0	0	0	0	0	0	0	0	0	0	0	0	0	0	0	0	0	0	0	0	0	0	0	0	0	0	0	0	0	0
C (M/E reads(tptm))	0	0	0	0	0	0	0	0	0	0	0	0	0	0	0	0	0	0	0	0	0	0	0	0	0	0	0	0	16	0	0	0	0	0	0	0	0	0	0	0	0	0	0	0	0	0	0	0	0
A (M/E reads(tptm))	0	0	0	0	0	0	0	0	0	0	0	0	0	0	0	0	0	0	0	0	0	0	0	0	0	0	0	0	0	0	0	0	0	0	0	0	0	0	0	0	0	0	0	0	0	0	0	0	0
G (M/E reads(tptm))	0	0	0	0	0	0	0	0	0	0	0	0	0	0	0	0	0	0	0	0	0	0	0	0	0	0	0	0	0	0	0	0	0	0	0	0	0	0	0	0	0	0	0	0	0	0	0	0	0
insert (M/E reads(tptm))	0	0	0	0	0	0	0	0	0	0	0	0	0	0	0	0	0	0	0	0	0	0	0	0	0	0	0	0	0	0	0	0	0	0	0	0	0	0	0	0	0	0	0	0	0	0	0	0	0
position on precursor	29
del (P(-log10))	0
U (P(-log10))	0
C (P(-log10))	300
A (P(-log10))	0
G (P(-log10))	0
insert (P(-log10))	0
[truncated: 42 more columns]
