# Supplementary material for: Characterizing Relevant MicroRNA Editing Sites in Parkinson’s Disease
Source: Cells. 2022 Dec 24;12(1):75. doi: 10.3390/cells12010075 (PMC9818192; doi:10.3390/cells12010075)
Supplement: Supplementary file 1 [file cells-12-00075-s001.zip › TableS17_FigS6-source-data-2022-12-4.xlsx]

## Sheet: Fig.S6a-b
The editing levels of five A-to-I and five other types of M/E sites with significantly different editing levels in PC and PD-PC-like samples. The editing levels of the M/E sites were retrieved from Table S2.1. The differences of editing levels between other PC samples and PD-PC-like samples were calculated with the Mann-Whitney U-test.
sample	PD-PC-like	PD-PC-like	PD-PC-like	PD-PC-like	PD-PC-like	PD-PC-like	PD-PC-like	PD-PC-like	PD-PC-like	PD-PC-like	PD-PC-like	PD-PC-like	PC	PC	PC	PC	PC	PC	PC	PC	PC	PC	PC	PC	PC	PC	PC	PC	PC	PC	PC	PC	PC	PC	PC	PC
ME_ID	SRR1759212	SRR1759213	SRR1759214	SRR1759215	SRR1759216	SRR1759217	SRR1759218	SRR1759219	SRR1759220	SRR1759235	SRR1759244	SRR1759245	SRR1759221	SRR1759222	SRR1759223	SRR1759224	SRR1759225	SRR1759226	SRR1759227	SRR1759228	SRR1759229	SRR1759230	SRR1759231	SRR1759232	SRR1759233	SRR1759234	SRR1759236	SRR1759237	SRR1759238	SRR1759239	SRR1759240	SRR1759241	SRR1759242	SRR1759243	SRR1759246	SRR1759247	P-value (PC vs PD-PC-like)	Corrected P-value (PC vs PD-PC-like)	ME_Category_Final
hsa-let-7a-2_28_A_g	0.435	0.388	0.453	0.397	0.31	0.434	0.37	0.34	0.4	0.415	0.336	0.395	0.401	0.509	0.481	0.5	0.475	0.48	0.358	0.478	0.487	0.454	0.425	0.408	0.486	0.448	0.454	0.492	0.547	0.642	0.423	0.476	0.582	0.54	0.421	0.39	0.000238021	0.00155074	A-to-I(G)
hsa-mir-1251_10_A_g	0.16	0.139	0.121	0.118	0.094	0.078	0.157	0.159	0.067	0.228	0.111	0.127	0.075	0.139	0.169	0.087	0.104	0.114	0.05	0.103	0.081	0.25	0.203	0.082	0.11	0.2	0.109	0.108	0.096	0.086	0.103	0.081	0.125	0.149	0.107	0.171	0.364811	0.522896	A-to-I(G)
hsa-mir-1301_52_A_g	0.107	0.118	0.095	0.142	0.125	0.135	0.089	0.11	0.094	0.105	0.114	0.13	0.089	0.092	0.075	0.073	0.089	0.042	0.133	0.092	0.131	0.105	0.074	0.103	0.105	0.116	0.058	0.065	0.085	0.113	0.074	0.075	0.068	0.087	0.109	0.098	0.002651	0.0105953	A-to-I(G)
hsa-mir-411_20_A_g	0.225	0.223	0.212	0.236	0.227	0.334	0.263	0.206	0.21	0.251	0.312	0.231	0.243	0.261	0.244	0.232	0.24	0.232	0.239	0.239	0.236	0.244	0.247	0.222	0.26	0.247	0.225	0.241	0.259	0.355	0.261	0.249	0.309	0.293	0.242	0.228	0.11849	0.222716	A-to-I(G)
hsa-mir-497_25_A_g	0.111	0.103	0.123	0.119	0.118	0.127	0.155	0.133	0.118	0.09	0.116	0.14	0.044	0.03	0.096	0.032	0.05	0.029	0.046	0.04	0.076	0.043	0.035	0.044	0.044	0.077	0.076	0.061	0.096	0.191	0.069	0.079	0.061	0.094	0.071	0.044	1.58833e-05	0.00019239	A-to-I(G)
hsa-mir-125b-1_25_C_u	0.017	0.014	0.016	0.016	0.016	0.021	0.016	0.016	0.023	0.015	0.019	0.019	0.049	0.059	0.043	0.075	0.048	0.072	0.05	0.051	0.043	0.077	0.043	0.056	0.076	0.041	0.057	0.061	0.046	0.076	0.045	0.046	0.052	0.06	0.036	0.07	1.40754e-06	4.85824e-05	C-to-U
hsa-mir-125b-2_27_C_u	0.017	0.014	0.016	0.016	0.016	0.021	0.016	0.016	0.022	0.015	0.019	0.019	0.049	0.059	0.043	0.075	0.048	0.072	0.05	0.05	0.042	0.076	0.043	0.055	0.075	0.041	0.057	0.061	0.046	0.076	0.045	0.046	0.052	0.06	0.036	0.07	1.40975e-06	4.85824e-05	C-to-U
hsa-mir-219a-2_33_C_u	0.061	0.076	0.076	0.078	0.084	0.042	0.068	0.059	0.07	0.067	0.04	0.092	0.13	0.127	0.096	0.077	0.12	0.085	0.105	0.114	0.075	0.116	0.112	0.159	0.103	0.079	0.104	0.077	0.083	0.025	0.073	0.079	0.071	0.086	0.062	0.12	0.00151378	0.00672001	C-to-U
hsa-mir-26a-1_9_G_-	0.275	0.091	0.059	0.04	0.186	0.038	0.051	0.102	0.079	0.042	0.033	0.163	0.042	0.001	0.017	0.047	0.003	0.05	0.033	0.009	0.008	0.046	0.038	0.006	0.055	0.008	0.004	0.031	0.018	0.192	0.005	0.023	0.013	0.003	0.014	0.014	0.000221812	0.00146875	other
