# Supplementary material for: Characterizing Relevant MicroRNA Editing Sites in Parkinson’s Disease
Source: Cells. 2022 Dec 24;12(1):75. doi: 10.3390/cells12010075 (PMC9818192; doi:10.3390/cells12010075)
Supplement: Supplementary file 1 [file cells-12-00075-s001.zip › TableS19_FigS8-source-data-2020-3-28.xlsx]

## Sheet: Fig. S8a-8e
The abundance of VAPB in different GSO datasets of Normal controls (NC) and PD patients (PD). The abundance of VAPB were extracted from five GEO datasets and P-values were calculated by two-tailed t-test.
Extended DATA Fig. S8a
GSE20292	GSM508708	GSM508717	GSM508720	GSM508721	GSM508722	GSM508723	GSM508724	GSM508725	GSM508726	GSM508729	GSM508730	GSM508733	GSM508734	GSM508735	GSM521253	GSM508713	GSM508710	GSM508711	GSM508712	GSM508714	GSM508715	GSM508716	GSM508718	GSM508728	GSM508731	GSM508732
class	Control	Control	Control	Control	Control	Control	Control	Control	Control	Control	Control	Control	Control	Control	Control	Parkinsons disease	Parkinsons disease	Parkinsons disease	Parkinsons disease	Parkinsons disease	Parkinsons disease	Parkinsons disease	Parkinsons disease	Parkinsons disease	Parkinsons disease	Parkinsons disease
202549_at	6.44953	6.28434	6.31513	6.50981	6.37245	7.72408	7.65816	7.80051	8.04985	6.01346	6.03996	6.31423	6.23605	5.94482	6.34371	6.42033	6.36494	6.54687	6.32238	6.30127	5.95748	6.15175	6.45568	6.15129	5.89501	6.49413
202550_s_at	9.49632	8.88799	9.49609	8.79934	9.49107	8.21209	8.50137	8.50648	8.10468	9.24967	9.29768	9.46736	9.19314	9.89624	9.57248	8.81181	8.24945	8.59932	8.8929	8.87546	8.96608	8.0401	8.91303	9.07727	8.99711	8.45398
P-value of 202549_at	0.0988778
P-value of 202550_s_at	0.0636344
Extended DATA Fig. S8b
GSE7621	GSM184354	GSM184355	GSM184356	GSM184357	GSM184358	GSM184359	GSM184360	GSM184361	GSM184362	GSM184363	GSM184364	GSM184365	GSM184366	GSM184367	GSM184368	GSM184369	GSM184370	GSM184371	GSM184372	GSM184373	GSM184374	GSM184375	GSM184376	GSM184377	GSM184378
class	Control	Control	Control	Control	Control	Control	Control	Control	Control	Parkinsons disease	Parkinsons disease	Parkinsons disease	Parkinsons disease	Parkinsons disease	Parkinsons disease	Parkinsons disease	Parkinsons disease	Parkinsons disease	Parkinsons disease	Parkinsons disease	Parkinsons disease	Parkinsons disease	Parkinsons disease	Parkinsons disease	Parkinsons disease
202549_at	87.32	123.99	28.48	29.26	98.91	69.34	36.9	16.36	35.93	56.35	50.66	53.85	85.51	47.11	65.4	48.85	47.17	22.42	87	133.06	128.55	28.39	85.33	59.13	87.54
202550_s_at	318.26	298.23	364.13	273.68	327.52	286.26	527.66	400.11	418.22	317.07	237.59	342.7	428.12	357.81	365.3	370.83	434.8	433.36	259.91	311.45	351.5	273.51	324	336.73	296.26
P-value of 202549_at	0.510946
P-value of 202550_s_at	0.550291
Extended DATA Fig. S8c
GSE20291	GSM508594	GSM508683	GSM508686	GSM508687	GSM508688	GSM508689	GSM508690	GSM508691	GSM508692	GSM508693	GSM508696	GSM508699	GSM508702	GSM508703	GSM508705	GSM508608	GSM508609	GSM508610	GSM508611	GSM508627	GSM508628	GSM508629	GSM508661	GSM508684	GSM508695	GSM508697	GSM508700	GSM508701	GSM508704	GSM508706
class	Control	Control	Control	Control	Control	Control	Control	Control	Control	Control	Control	Control	Control	Control	Control	Parkinsons disease	Parkinsons disease	Parkinsons disease	Parkinsons disease	Parkinsons disease	Parkinsons disease	Parkinsons disease	Parkinsons disease	Parkinsons disease	Parkinsons disease	Parkinsons disease	Parkinsons disease	Parkinsons disease	Parkinsons disease	Parkinsons disease
202549_at	5.63399	5.45154	5.55277	5.59524	5.44973	6.39276	6.57282	6.36555	6.89356	5.70915	6.37025	7.45186	6.44017	5.7066	5.89907	5.79067	5.78888	6.16733	5.75909	5.55174	5.73806	5.95319	5.70072	5.46372	6.61728	6.76428	6.12739	6.78299	5.78948	5.86058
202550_s_at	8.60124	7.92996	8.55158	8.56718	8.04013	8.35582	8.56621	7.94709	7.64516	9.02152	8.8232	8.66514	8.91849	7.36486	8.23008	8.54134	8.69421	8.28944	7.66508	8.22225	8.11311	8.43914	8.12784	8.52623	8.72394	8.66542	9.15211	8.94304	8.33463	8.52623
P-value of 202549_at	0.569151
P-value of 202550_s_at	0.462481
Extended DATA Fig. S8d
GSE130752	GSM3753081_bulkRNAseq_15-033_CD271	GSM3753080_bulkRNAseq_15-018_CD271	GSM3753082_bulkRNAseq_15-093_CD271	GSM3753092_bulkRNAseq_16-116_SVZ	GSM3753093_bulkRNAseq_16-137_SVZ	GSM3753095_bulkRNAseq_18-105_CD271	GSM3753096_bulkRNAseq_15-087_CD11b	GSM3753097_bulkRNAseq_16-116_CD11b	GSM3753083_bulkRNAseq_16-016_CD271	GSM3753084_bulkRNAseq_16-084_CD271	GSM3753085_bulkRNAseq_16-090_SVZ	GSM3753086_bulkRNAseq_16-098_CD271	GSM3753087_bulkRNAseq_16-098_SVZ	GSM3753088_bulkRNAseq_16-101_CD271	GSM3753089_bulkRNAseq_16-101_SVZ	GSM3753090_bulkRNAseq_16-102_CD271	GSM3753091_bulkRNAseq_16-102_SVZ	GSM3753094_bulkRNAseq_17-043_SVZ	GSM3753098_bulkRNAseq_16-084_CD11b	GSM3753099_bulkRNAseq_16-090_CD11b	GSM3753100_bulkRNAseq_16-101_CD11b	GSM3753101_bulkRNAseq_16-016_CD11b
class	Control	Control	Control	Control	Control	Control	Control	Control	Parkinson's disease	Parkinson's disease	Parkinson's disease	Parkinson's disease	Parkinson's disease	Parkinson's disease	Parkinson's disease	Parkinson's disease	Parkinson's disease	Parkinson's disease	Parkinson's disease	Parkinson's disease	Parkinson's disease	Parkinson's disease
VAPB	80	54	47	31	68	70	23	44	33	110	38	48	218	86	50	69	158	43	27	30	84	36
P-value	0.308421
Extended DATA Fig. S8e
GSE110716	GSM3014964	GSM3014965	GSM3014966	GSM3014967	GSM3014968	GSM3014969	GSM3014970	GSM3014971	GSM3014972	GSM3014973	GSM3014974	GSM3014975	GSM3014976	GSM3014977	GSM3014978	GSM3014979
class	Control	Control	Control	Control	Control	Control	Control	Control	PD	PD	PD	PD	PD	PD	PD	PD
VAPB	7324	3994	8465	4052	6284	4424	7586	12291	2567	4440	10526	4322	6240	4685	7132	6376
P-value	0.449328
GSE110716	Extended DATA Fig. 7d
GSE110716	GSM3014964	GSM3014965	GSM3014966	GSM3014967	GSM3014968	GSM3014969	GSM3014970	GSM3014971	GSM3014972	GSM3014973	GSM3014974	GSM3014975	GSM3014976	GSM3014977	GSM3014978	GSM3014979
class	Control	Control	Control	Control	Control	Control	Control	Control	PD	PD	PD	PD	PD	PD	PD	PD
VAPB	7324	3994	8465	4052	6284	4424	7586	12291	2567	4440	10526	4322	6240	4685	7132	6376
P-value	0.449634
GSE130752	Extended DATA Fig. 7e
GSE130752	GSM3753081_bulkRNAseq_15-033_CD271	GSM3753080_bulkRNAseq_15-018_CD271	GSM3753082_bulkRNAseq_15-093_CD271	GSM3753092_bulkRNAseq_16-116_SVZ	GSM3753093_bulkRNAseq_16-137_SVZ	GSM3753095_bulkRNAseq_18-105_CD271	GSM3753096_bulkRNAseq_15-087_CD11b	GSM3753097_bulkRNAseq_16-116_CD11b	GSM3753083_bulkRNAseq_16-016_CD271	GSM3753084_bulkRNAseq_16-084_CD271	GSM3753085_bulkRNAseq_16-090_SVZ	GSM3753086_bulkRNAseq_16-098_CD271	GSM3753087_bulkRNAseq_16-098_SVZ	GSM3753088_bulkRNAseq_16-101_CD271	GSM3753089_bulkRNAseq_16-101_SVZ	GSM3753090_bulkRNAseq_16-102_CD271	GSM3753091_bulkRNAseq_16-102_SVZ	GSM3753094_bulkRNAseq_17-043_SVZ	GSM3753098_bulkRNAseq_16-084_CD11b	GSM3753099_bulkRNAseq_16-090_CD11b	GSM3753100_bulkRNAseq_16-101_CD11b	GSM3753101_bulkRNAseq_16-016_CD11b
class	Control	Control	Control	Control	Control	Control	Control	Control	Parkinson's disease	Parkinson's disease	Parkinson's disease	Parkinson's disease	Parkinson's disease	Parkinson's disease	Parkinson's disease	Parkinson's disease	Parkinson's disease	Parkinson's disease	Parkinson's disease	Parkinson's disease	Parkinson's disease	Parkinson's disease
VAPB	80	54	47	31	68	70	23	44	33	110	38	48	218	86	50	69	158	43	27	30	84	36
P-value	0.208
GSE20291	Extended DATA Fig. 7f
GSE20291	GSM508594	GSM508683	GSM508686	GSM508687	GSM508688	GSM508689	GSM508690	GSM508691	GSM508692	GSM508693	GSM508696	GSM508699	GSM508702	GSM508703	GSM508705	GSM508608	GSM508609	GSM508610	GSM508611	GSM508627	GSM508628	GSM508629	GSM508661	GSM508684	GSM508695	GSM508697	GSM508700	GSM508701	GSM508704	GSM508706
class	Control	Control	Control	Control	Control	Control	Control	Control	Control	Control	Control	Control	Control	Control	Control	Parkinsons disease	Parkinsons disease	Parkinsons disease	Parkinsons disease	Parkinsons disease	Parkinsons disease	Parkinsons disease	Parkinsons disease	Parkinsons disease	Parkinsons disease	Parkinsons disease	Parkinsons disease	Parkinsons disease	Parkinsons disease	Parkinsons disease
202549_at	5.63399	5.45154	5.55277	5.59524	5.44973	6.39276	6.57282	6.36555	6.89356	5.70915	6.37025	7.45186	6.44017	5.7066	5.89907	5.79067	5.78888	6.16733	5.75909	5.55174	5.73806	5.95319	5.70072	5.46372	6.61728	6.76428	6.12739	6.78299	5.78948	5.86058
202550_s_at	8.60124	7.92996	8.55158	8.56718	8.04013	8.35582	8.56621	7.94709	7.64516	9.02152	8.8232	8.66514	8.91849	7.36486	8.23008	8.54134	8.69421	8.28944	7.66508	8.22225	8.11311	8.43914	8.12784	8.52623	8.72394	8.66542	9.15211	8.94304	8.33463	8.52623
P-value of 202549_at	0.569666
P-value of 202550_s_at	0.46292

## Sheet: Fig. S8f-8i
The Spearman correlation coefficient between the ages of normal control samples and the abundances of VAPB in different GEO datasets. The Spearman correlation (ρ) and P-value were calcuated with the corr function in MatLab (MathWorks, MA).
Extended DATA Fig. S8f
GSE20168	GSM506037	GSM506047	GSM506050	GSM506051	GSM506052	GSM506053	GSM506054	GSM506055	GSM506056	GSM506057	GSM506060	GSM506061	GSM506064	GSM506065	GSM506067
class	Control	Control	Control	Control	Control	Control	Control	Control	Control	Control	Control	Control	Control	Control	Control
age	57	94	79	67	54	73	82	72	73	60	74	72	75	81	55
202549_at	7.17814	6.89637	7.569	7.10367	8.03521	6.97892	6.79578	6.38699	7.33279	8.75856	6.463	6.14086	6.30064	6.43182	7.5567
ρ	-0.466906
P-value	0.0793223
Extended DATA Fig. S8g
GSE20292	GSM508708	GSM508717	GSM508720	GSM508721	GSM508722	GSM508723	GSM508724	GSM508725	GSM508726	GSM508729	GSM508730	GSM508733	GSM508734	GSM508735	GSM521253
class	Control	Control	Control	Control	Control	Control	Control	Control	Control	Control	Control	Control	Control	Control	Control
age	57	94	79	67	54	73	82	72	73	74	72	75	81	55	59
202550_s_at	9.49632	8.88799	9.49609	8.79934	9.49107	8.21209	8.50137	8.50648	8.10468	9.24967	9.29768	9.46736	9.19314	9.89624	9.57248
ρ	-0.472273
P-value	0.0754743
Extended DATA Fig. S8h
GSE20291	GSM508594	GSM508683	GSM508686	GSM508687	GSM508688	GSM508689	GSM508690	GSM508691	GSM508692	GSM508693	GSM508696	GSM508699	GSM508702	GSM508703	GSM508705
class	Control	Control	Control	Control	Control	Control	Control	Control	Control	Control	Control	Control	Control	Control	Control
age	57	94	79	67	54	73	82	72	73	60	74	72	75	81	55
202550_s_at	8.60124	7.92996	8.55158	8.56718	8.04013	8.35582	8.56621	7.94709	7.64516	9.02152	8.8232	8.66514	8.91849	7.36486	8.23008
ρ	-0.198569
P-value	0.478045
Extended DATA Fig. S8i
GSE130752	GSM3753081_bulkRNAseq_15-033_CD271	GSM3753080_bulkRNAseq_15-018_CD271	GSM3753082_bulkRNAseq_15-093_CD271	GSM3753092_bulkRNAseq_16-116_SVZ	GSM3753093_bulkRNAseq_16-137_SVZ	GSM3753095_bulkRNAseq_18-105_CD271	GSM3753096_bulkRNAseq_15-087_CD11b	GSM3753097_bulkRNAseq_16-116_CD11b
class	Control	Control	Control	Control	Control	Control	Control	Control
age	-	84	86	81	77	87	75	81
VAPB__chr20	80	54	47	31	68	70	23	44
ρ	0.594619
P-value	0.169841

## Sheet:  Fig. S8j-8n
The Spearman correlation coefficient between the ages of Parkinson's disease samples and the abundances of VAPB in different GEO datasets. The Spearman correlation (ρ) and P-value were calcuated with the corr function in MatLab (MathWorks, MA).
Extended DATA Fig. S8j
GSE68719	GSM1679692	GSM1679693	GSM1679694	GSM1679695	GSM1679696	GSM1679697	GSM1679698	GSM1679699	GSM1679700	GSM1679701	GSM1679702	GSM1679703	GSM1679704	GSM1679705	GSM1679706	GSM1679707	GSM1679708	GSM1679709	GSM1679710	GSM1679711	GSM1679712	GSM1679713	GSM1679714	GSM1679715	GSM1679716	GSM1679717	GSM1679718	GSM1679719	GSM1679720
class	Parkinson's disease	Parkinson's disease	Parkinson's disease	Parkinson's disease	Parkinson's disease	Parkinson's disease	Parkinson's disease	Parkinson's disease	Parkinson's disease	Parkinson's disease	Parkinson's disease	Parkinson's disease	Parkinson's disease	Parkinson's disease	Parkinson's disease	Parkinson's disease	Parkinson's disease	Parkinson's disease	Parkinson's disease	Parkinson's disease	Parkinson's disease	Parkinson's disease	Parkinson's disease	Parkinson's disease	Parkinson's disease	Parkinson's disease	Parkinson's disease	Parkinson's disease	Parkinson's disease
age	74	83	80	83	80	84	88	81	77	64	85	94	80	85	75	74	89	66	65	85	64	64	75	68	95	74	68	79	70
VAPB	3890.24	2249.74	3490.66	2838.69	2219.64	3622.5	2923.84	2635.63	2928.03	2039.2	2403.22	2470.94	2407.58	3465.28	2900.4	2815.2	2602.76	2604.02	3645.98	3924.29	3031.12	3298.44	2456.3	2847.79	2268.19	2938.06	4019.66	2259.94	2506.35
ρ	-0.195038
P-value	0.310634
Extended DATA Fig. S8k
GSE20168	GSM506039	GSM506040	GSM506041	GSM506042	GSM506043	GSM506044	GSM506045	GSM506046	GSM506048	GSM506059	GSM506062	GSM506063	GSM506066	GSM506068
class	Parkinson's disease	Parkinson's disease	Parkinson's disease	Parkinson's disease	Parkinson's disease	Parkinson's disease	Parkinson's disease	Parkinson's disease	Parkinson's disease	Parkinson's disease	Parkinson's disease	Parkinson's disease	Parkinson's disease	Parkinson's disease
age	73	80	78	84	70	82	70	80	70	75	79	67	81	89
202549_at	6.29819	6.36789	7.03469	6.35193	6.75593	6.60446	6.90588	7.14769	6.90984	6.13786	6.32071	6.1953	6.53116	6.71681
ρ	0.0508295
P-value	0.862994
Extended DATA Fig.S8l
GSE20292	GSM508713	GSM508710	GSM508711	GSM508712	GSM508714	GSM508715	GSM508716	GSM508718	GSM508728	GSM508731	GSM508732
class	Parkinsons disease	Parkinsons disease	Parkinsons disease	Parkinsons disease	Parkinsons disease	Parkinsons disease	Parkinsons disease	Parkinsons disease	Parkinsons disease	Parkinsons disease	Parkinsons disease
age	70	73	80	84	82	70	80	70	75	79	67
202550_s_at	8.81181	8.24945	8.59932	8.8929	8.87546	8.96608	8.0401	8.91303	9.07727	8.99711	8.45398
ρ	-0.013794
P-value	0.967892
Extended DATA Fig. S8m
GSE20291	GSM508608	GSM508609	GSM508610	GSM508611	GSM508627	GSM508628	GSM508629	GSM508661	GSM508684	GSM508695	GSM508697	GSM508700	GSM508701	GSM508704	GSM508706
class	Parkinsons disease	Parkinsons disease	Parkinsons disease	Parkinsons disease	Parkinsons disease	Parkinsons disease	Parkinsons disease	Parkinsons disease	Parkinsons disease	Parkinsons disease	Parkinsons disease	Parkinsons disease	Parkinsons disease	Parkinsons disease	Parkinsons disease
age	73	80	78	84	70	82	70	80	70	75	73	79	67	81	89
202550_s_at	8.54134	8.69421	8.28944	7.66508	8.22225	8.11311	8.43914	8.12784	8.52623	8.72394	8.66542	9.15211	8.94304	8.33463	8.52623
ρ	-0.391738
P-value	0.148726
Extended DATA Fig. S8n
GSE130752	GSM3753083_bulkRNAseq_16-016_CD271	GSM3753084_bulkRNAseq_16-084_CD271	GSM3753085_bulkRNAseq_16-090_SVZ	GSM3753086_bulkRNAseq_16-098_CD271	GSM3753087_bulkRNAseq_16-098_SVZ	GSM3753088_bulkRNAseq_16-101_CD271	GSM3753089_bulkRNAseq_16-101_SVZ	GSM3753090_bulkRNAseq_16-102_CD271	GSM3753091_bulkRNAseq_16-102_SVZ	GSM3753094_bulkRNAseq_17-043_SVZ	GSM3753098_bulkRNAseq_16-084_CD11b	GSM3753099_bulkRNAseq_16-090_CD11b	GSM3753100_bulkRNAseq_16-101_CD11b	GSM3753101_bulkRNAseq_16-016_CD11b
class	Parkinson's disease	Parkinson's disease	Parkinson's disease	Parkinson's disease	Parkinson's disease	Parkinson's disease	Parkinson's disease	Parkinson's disease	Parkinson's disease	Parkinson's disease	Parkinson's disease	Parkinson's disease	Parkinson's disease	Parkinson's disease
age	66	70	80	73	73	88	88	78	78	80	70	80	88	66
VAPB__chr20	33	110	38	48	218	86	50	69	158	43	27	30	84	36
ρ	0.249465
P-value	0.38973
