# Supplementary material for: Characterizing Relevant MicroRNA Editing Sites in Parkinson’s Disease
Source: Cells. 2022 Dec 24;12(1):75. doi: 10.3390/cells12010075 (PMC9818192; doi:10.3390/cells12010075)
Supplement: Supplementary file 1 [file cells-12-00075-s001.zip › TableS20_FigS9-source-data-2021-04-06.xlsx]

## Sheet: Fig. S8a
The luciferase activities when co-transfecting a pGLO plasmid containing the 3' UTR segment of monkey OPA1 or mutated segment of monkey OPA1 (mfaOPA1m) in Fig. S9c and a pCDNA plasmid containing the original pre-hsa-mir-497 (p497) or A-to-I edited pre-hsa-mir-497, i.e., pre-hsa-mir-497_25g (p497_25g). The values are the Firefly/Renilla ratios. For each co-transfection pair, three biological repli…
	Control	Monkey
Sample	pCDNA + pGLO	p497_25g + pGLO-mfaOPA1	p497_25g + pGLO-mfaOPA1m	p497 + pGLO-mfaOPA1
biological_rep1	1.75	0.86	1.31	1.17
biological_rep2	1.91	0.76	1.23	1.07
biological_rep3	1.72	0.73	1.16	1.19
mean	1.79333	0.783333	1.23333	1.14333
std	0.102144	0.0680686	0.0750555	0.064291
Comparisons
GroupA	GroupB	P-value (two-tailed t-test)
p497_25g + pGLO-mfaOPA1	pCDNA + pGLO	0.000140778
p497_25g + pGLO-mfaOPA1	p497_25g + pGLO-mfaOPA1m	0.0015364
p497_25g + pGLO-mfaOPA1	p497 + pGLO-mfaOPA1	0.00264089
Raw data
biological_rep1
technical_replicate	pCDNA + pGLO	p497_25g + pGLO-mfaOPA1	p497_25g + pGLO-mfaOPA1m	p497 + pGLO-mfaOPA1
1	1.76434	0.924961	1.154	1.20501
2	1.76836	0.884971	1.40593	1.22797
3	1.73091	0.768873	1.36226	1.07818
avg1	1.75453	0.859602	1.3074	1.17039
biological_rep2
technical_replicate	pCDNA + pGLO	p497_25g + pGLO-mfaOPA1	p497_25g + pGLO-mfaOPA1m	p497 + pGLO-mfaOPA1
1	1.8711	0.796471	1.13163	1.01749
2	2.02025	0.723267	1.05233	1.11725
3	1.83063	0.765868	1.49951	1.08737
avg2	1.90733	0.761869	1.22782	1.07403
biological_rep3
technical_replicate	pCDNA + pGLO	p497_25g + pGLO-mfaOPA1	p497_25g + pGLO-mfaOPA1m	p497 + pGLO-mfaOPA1
1	1.83233	0.728496	1.16592	1.22438
2	1.7379	0.740014	1.08794	1.11896
3	1.60073	0.710953	1.22147	1.22539
avg3	1.72366	0.726488	1.15844	1.18958

## Sheet: Fig. S8b
The luciferase activities when co-transfecting a pGLO plasmid containing the 3' UTR segment of monkey VAPB (mfaVAPB) or mutated segment of monkey VAPB (mfaVAPBm) in Fig. S9d and a pCDNA plasmid containing the original pre-hsa-mir-497 (p497) or A-to-I edited pre-hsa-mir-497, i.e., pre-hsa-mir-497_25g (p497_25g). The values are the Firefly/Renilla ratios. For each co-transfection pair, three biolog…
	Control	Monkey
Sample	pCDNA + pGLO	p497_25g + pGLO-mfaVAPB	p497_25g + pGLO-mfaVAPBm	p497 + pGLO-mfaVAPB
biological_rep1	1.63	0.57	0.99	1.12
biological_rep2	1.55	0.78	1.03	1.21
biological_rep3	1.63	0.46	0.87	1.21
mean	1.60333	0.603333	0.963333	1.18
std	0.046188	0.162583	0.0832666	0.0519615
Comparisons
GroupA	GroupB	P-value (two-tailed t-test)
p497_25g + pGLO-mfaVAPB	pCDNA + pGLO	0.000511151
p497_25g + pGLO-mfaVAPB	p497_25g + pGLO-mfaVAPBm	0.0269392
p497_25g + pGLO-mfaVAPB	p497 + pGLO-mfaVAPB	0.00425441
Raw data
biological_rep1
technical_replicate	pCDNA + pGLO	p497_25g + pGLO-mfaVAPB	p497_25g + pGLO-mfaVAPBm	p497 + pGLO-mfaVAPB
1	1.59371	0.644936	0.910779	1.03309	补OPA1
2	1.59986	0.507845	0.955507	1.09406
3	1.69118	0.548919	1.101	1.23227
avg1	1.62825	0.567233	0.989096	1.11981
biological_rep2
technical_replicate	pCDNA + pGLO	p497_25g + pGLO-mfaVAPB	p497_25g + pGLO-mfaVAPBm	p497 + pGLO-mfaVAPB
1	1.65085	0.763387	0.951574	1.1797	补OPA1
2	1.43106	0.785387	1.0246	1.28604
3	1.57089	0.780174	1.11827	1.15032
avg2	1.55093	0.776316	1.03148	1.20535
biological_rep3
technical_replicate	pCDNA + pGLO	p497_25g + pGLO-mfaVAPB	p497_25g + pGLO-mfaVAPBm	p497 + pGLO-mfaVAPB
1	1.51678	0.448784	0.825846	1.1568	补EGFR
2	1.67125	0.456149	0.780638	1.26748
3	1.70056	0.47484	1.01706	1.20766
avg3	1.62953	0.459925	0.874513	1.21065
